# Supplementary material for: Diagnostic Role of Cell-Free miRNAs in Identifying Placenta Accreta Spectrum during the First-Trimester Screening
Source: Preprints.org preprint supplement (doi:10.20944/preprints202312.0752.v1), 2023-12-12
Supplement: Supplementary file 2 [file Table S1.xlsx]

## Sheet: Sheet1
Ppi versus Ppc
Gene	baseMean	log2FoldChange	lfcSE	stat	pvalue
hsa-miR-10b-5p	8818.73	5.27164	1.36086	3.87376	0.000107168
hsa-miR-3615	1382.3	4.19187	1.11206	3.76945	0.000163606
hsa-miR-25-3p	23099.6	4.28298	1.16647	3.67175	0.000240895
hsa-miR-342-5p	242.458	3.82667	1.05734	3.61915	0.000295577
hsa-miR-185-5p	2561.82	4.14548	1.15303	3.5953	0.000324022
hsa-let-7i-5p	57260.1	4.20829	1.17854	3.57077	0.000355939
hsa-miR-7-5p	2879.94	4.23656	1.19378	3.54887	0.000386889
hsa-miR-92a-3p	190197	3.87099	1.105	3.50317	0.000459759
hsa-miR-148a-3p	43279.7	3.6499	1.05833	3.44873	0.000563233
hsa-miR-2110	446.088	3.49914	1.01754	3.43881	0.000584267
hsa-miR-182-5p	890.368	4.07002	1.18728	3.42801	0.000608016
hsa-miR-139-3p	273.847	4.21716	1.23195	3.42316	0.00061897
hsa-miR-30e-5p	2688.86	3.37677	0.995974	3.39042	0.000697868
hsa-miR-151a-3p	10532.1	3.52448	1.04022	3.38822	0.000703484
hsa-miR-183-5p	2317.03	3.57949	1.07146	3.34077	0.000835462
hsa-miR-144-3p	884.393	4.03331	1.22527	3.29176	0.000995621
hsa-miR-363-3p	2732.76	3.75669	1.14463	3.28202	0.00103068
hsa-miR-16-5p	4380.55	3.45054	1.06524	3.23922	0.00119857
hsa-miR-19b-3p	351.88	3.62921	1.13758	3.19028	0.00142137
hsa-miR-7706	257.295	2.7638	0.871061	3.17291	0.00150919
hsa-miR-15b-3p	141.773	4.15116	1.31912	3.14692	0.00165
hsa-miR-10a-5p	2530.2	2.90375	0.924731	3.1401	0.00168892
hsa-miR-335-3p	359.748	-1.84385	0.594594	-3.10103	0.00192847
hsa-let-7a-3p	207.32	3.562	1.17954	3.01982	0.00252927
hsa-miR-194-5p	1061.53	2.73281	0.909792	3.00377	0.00266653
hsa-miR-18a-3p	128.044	3.00667	1.02796	2.9249	0.00344565
hsa-miR-629-5p	1939.38	2.60435	0.899447	2.89551	0.00378548
hsa-miR-1180-3p	810.64	2.66587	0.924064	2.88494	0.00391491
hsa-miR-92b-3p	729.074	2.5002	0.874927	2.85761	0.00426848
hsa-miR-339-3p	170.792	1.87556	0.685514	2.736	0.00621919
hsa-let-7g-5p	21155.1	2.63304	0.971185	2.71117	0.00670468
hsa-miR-484	2180.9	1.97356	0.727988	2.71098	0.00670854
hsa-miR-320c	821.866	2.12926	0.788424	2.70065	0.00692034
hsa-miR-320b	2271.78	2.00225	0.741433	2.70051	0.00692327
hsa-miR-152-3p	478.958	-1.85691	0.688181	-2.69828	0.00696985
hsa-miR-625-3p	815.353	2.49604	0.937375	2.6628	0.00774944
hsa-miR-625-5p	791.651	2.47069	0.933522	2.64663	0.00812984
hsa-miR-320d	202.127	2.24598	0.852837	2.63354	0.00844999
hsa-miR-20b-5p	113.403	3.0825	1.18581	2.5995	0.00933608
hsa-miR-106b-5p	158.479	2.3786	0.92047	2.58411	0.00976309
hsa-miR-98-5p	335.051	2.77292	1.07398	2.58192	0.0098252
hsa-miR-146b-5p	1373.87	2.40278	0.931506	2.57946	0.00989555
hsa-miR-199a-3p	16145.9	-2.30661	0.895226	-2.57657	0.00997872
hsa-miR-501-3p	391.68	2.36649	0.929136	2.54698	0.0108659
hsa-miR-328-3p	1129.07	2.0675	0.817678	2.52851	0.0114549
hsa-miR-199b-3p	8067.62	-2.30589	0.917693	-2.5127	0.0119812
hsa-miR-20a-5p	648.714	1.97585	0.788518	2.50578	0.0122183
hsa-let-7f-5p	17972.6	2.46384	0.984637	2.50228	0.0123395
hsa-miR-22-5p	237.094	2.19149	0.877631	2.49706	0.0125229
hsa-miR-330-3p	159.508	1.01635	0.407489	2.49419	0.0126246
hsa-miR-186-5p	1950.41	2.04409	0.823456	2.48233	0.0130525
hsa-miR-374a-5p	239.041	2.03387	0.834879	2.43613	0.0148454
hsa-miR-181a-3p	89.0475	-1.89816	0.802344	-2.36577	0.0179928
hsa-let-7b-3p	121.023	2.10169	0.900798	2.33314	0.0196408
hsa-miR-760	57.1349	1.98157	0.851928	2.32599	0.0200192
hsa-miR-320a	14687.8	0.766081	0.336102	2.27931	0.0226485
hsa-let-7d-5p	1667.81	2.04579	0.904209	2.26252	0.0236655
hsa-miR-17-5p	565.397	1.60222	0.718678	2.2294	0.0257875
hsa-miR-29b-3p	95.1166	1.23403	0.565884	2.18072	0.0292041
hsa-miR-22-3p	7706.2	1.10733	0.512496	2.16066	0.0307216
hsa-let-7c-5p	6778.03	2.07003	0.965567	2.14385	0.0320453
hsa-miR-425-5p	657.147	1.52256	0.721028	2.11165	0.0347161
hsa-miR-335-5p	79.5638	-1.25767	0.598688	-2.10072	0.0356659
hsa-miR-25-5p	76.3466	1.97431	0.942267	2.09528	0.0361461
hsa-miR-375	271.366	2.05326	0.982885	2.08901	0.0367068
hsa-miR-140-3p	3161.52	1.1124	0.536782	2.07234	0.0382335
hsa-miR-199a-5p	6844.27	-2.25746	1.09306	-2.06526	0.0388988
hsa-miR-99a-5p	7812.46	2.22562	1.08106	2.05873	0.0395199
hsa-miR-196a-5p	23.1406	-2.71071	1.31783	-2.05695	0.0396914
hsa-miR-107	980.335	1.53341	0.748374	2.04899	0.0404627
hsa-miR-455-5p	357.078	-1.77656	0.867816	-2.04716	0.0406421
hsa-miR-6511b-3p	59.9064	1.41602	0.699766	2.02357	0.0430149
hsa-miR-1269a	293.664	-3.61813	1.79256	-2.01842	0.043548
hsa-miR-432-5p	651.87	-1.5962	0.80046	-1.9941	0.0461414
hsa-miR-140-5p	182.92	1.32015	0.663747	1.98894	0.0467077
hsa-miR-486-5p	5030.54	8.20513	1.54965	5.29484	1.1912e-07
hsa-miR-451a	267936	7.39535	1.5362	4.81405	1.47905e-06
hsa-let-7b-5p	171225	5.81957	1.35132	4.30657	1.65807e-05
hsa-miR-92b-5p	375.897	5.24039	1.22304	4.28473	1.82963e-05
hsa-miR-101-3p	17533.2	4.85532	1.13675	4.27122	1.94408e-05
hsa-miR-142-5p	4579.02	7.48413	1.46806	5.09799	3.43277e-07
hsa-miR-16-2-3p	5215.05	7.3708	1.45486	5.06632	4.05581e-07
hsa-miR-128-3p	12113.9	4.95853	1.22501	4.04776	5.17097e-05
hsa-miR-192-5p	3734.06	4.60694	1.14415	4.02653	5.66065e-05
hsa-let-7d-3p	2395.68	4.68519	1.16507	4.02138	5.78589e-05

## Sheet: Sheet2
mirnaid	refseqid	genesymbol	duplex	start	end	bindingp	energy	seed	accessibility	au	phylopstem	phylopflank	me	number_of_pairings	binding_region_length	longest_consecutive_pairings	position	validated	TargetScan	miRDB
hsa-let-7a-3p	XM_047418649	BRPF3	CTATACAATCTACTGTCTTTC#GATGTCGAGGGTGGTTTGTGTGGA#((((((((.(((((.((....#.)).))))).)))))))).	4571	4595	1.0	-18.8	1	0.0001511908	0.412	0.0	0.0	-5.729413664698063	15	19	8	3UTR	MIRT660136	0	1
hsa-let-7a-3p	NM_001731	BTG1	CTATACAATCTACTGTCTTTC#AGTGGATTGTATAGC#((((((((((((((.......#)))))))))))))).	3513	3528	1.0	-18.4	1	0.02310973	0.603	0.0	0.0	-4.906073086755913	14	15	14	3UTR	MIRT497923	0	1
hsa-let-7b-3p	NM_001122898	CD99	CTATACAACCTACTGCCTTCCC#GGGGGGGCGGTTTCCCATGGGATGTGA#...((((.((((((((((((((#))))))))))).......))).)))).	810	837	0.9615384615384616	-22.7	0	0.0001492685	0.426	-0.058479790476190494	-0.237659038	-8.82817512285937	18	27	11	3UTR	MIRT610201	0	0
hsa-let-7b-3p	NM_001321368	CD99	CTATACAACCTACTGCCTTCCC#GGGGGGGCGGTTTCCCATGGGATGTGA#...((((.((((((((((((((#))))))))))).......))).)))).	855	882	0.9615384615384616	-22.7	0	0.0001492685	0.426	-0.058479790476190494	-0.237659038	-8.82817512285937	18	27	11	3UTR	MIRT610201	0	0
hsa-let-7b-3p	NM_001351288	MGAT4C	CTATACAACCTACTGCCTTCCC#GGGAAGGCCTATAGTAGT#.........(((((((((((((#))))))))....))))).	2415	2433	1.0	-19.2	0	0.001171174	0.676	0.07259752941176473	-0.2195411237500001	-20.48026952694116	13	18	8	3UTR	MIRT541525	0	0
hsa-let-7b-3p	NM_001351291	MGAT4C	CTATACAACCTACTGCCTTCCC#GGGAAGGCCTATAGTAGT#.........(((((((((((((#))))))))....))))).	3535	3553	1.0	-19.2	0	0.001171174	0.676	0.062315235294117685	0.05664653000000002	-20.48026952694116	13	18	8	3UTR	MIRT541525	0	0
hsa-let-7b-3p	NM_001354596	GSK3B	CTATACAACCTACTGCCTTCCC#AAGGACTGTGGGTTGTATAC#.((((((((((((.(((((...#)))).).)))))))))))).	6721	6741	1.0	-20.9	1	0.008441502	0.721	0.0	0.0	-4.650164754877524	17	20	12	3UTR	MIRT120264	0	1
hsa-let-7b-3p	NM_001367990	MDM2	CTATACAACCTACTGCCTTCCC#GGGAGGTAGCTGGGA#........(((((((((((((.#))))))))).)))).	6187	6202	1.0	-19.7	0	0.003342451	0.456	0.0	0.0	-19.423879868695398	13	15	9	3UTR	MIRT573533	0	1
hsa-let-7b-3p	XM_047418649	BRPF3	CTATACAACCTACTGCCTTCCC#GGGAAGGACATGGTGTATAT#.(((((.(((...(((((((((#))))))).)).)))))))).	5275	5295	1.0	-19.9	0	0.0003651823	0.691	0.0	0.0	-12.797719769901386	17	20	8	3UTR	MIRT660135	0	1
hsa-let-7b-3p	XM_047441935	PHF8	CTATACAACCTACTGCCTTCCC#GGGGAGGGGTTGGGAGTGTTAGT#((((((..((.(((.(((((((#)))))))))).))..)))).)).	4234	4257	1.0	-19.9	0	0.03009767	0.559	0.0	0.0	-11.3551199459146	18	23	10	3UTR	MIRT521929	0	0
hsa-let-7b-3p	XM_047450092	GPRIN3	CTATACAACCTACTGCCTTCCC#GGGAAGCAGAGGTTGC#.....((((((.(((.((((((#))))))))))))))).	11717	11733	1.0	-22.0	0	4.401601e-05	0.441	0.0	0.0	-17.245452033350368	15	16	15	3UTR	MIRT612925	0	1
hsa-let-7b-3p	NM_173473	ANAPC16	CTATACAACCTACTGCCTTCCC#GGAGGCGGAGGTTGC#.....((((((.((((((((..#)))))))))))))).	2447	2462	1.0	-22.1	0	4.918259e-05	0.471	0.0	0.0	-17.012402953046756	14	15	14	3UTR	MIRT705712	0	1
hsa-let-7b-3p	NM_178544	ZNF546	CTATACAACCTACTGCCTTCCC#GGAAGGCCCTGTGGGTGTAAGA#((.(((.((((((.(((((((.#)))))))...))))))))))).	4010	4032	1.0	-22.7	0	0.0002184431	0.603	0.0	0.0	-7.895640372899838	18	22	11	3UTR	MIRT717924	0	0
hsa-let-7b-3p	NM_181782	NCOA7	CTATACAACCTACTGCCTTCCC#GGGAGGCTGAGGCAGGAGAATTGCTTGAATCCGGGAAGCAGAGGTTGTAGTGA#(..((((((((.(((.((((((#.)))))))))))))))))..).	4479	4532	1.0	-25.8	0	0.003343059	0.485	0.0	0.0	-10.238642192423255	18	22	17	3UTR	MIRT543945	0	0
hsa-let-7b-3p	NM_181782	NCOA7	CTATACAACCTACTGCCTTCCC#GGGAGGGACCTAGTGGGATGTGATTAGA#(((((((.((((((((((((((#)))))))...))))))).))))..))).	6016	6044	1.0	-23.7	1	0.05061422	0.441	0.0	0.0	-6.251209375382295	21	28	7	3UTR	MIRT543945	0	0
hsa-let-7b-3p	NM_198077	C1orf52	CTATACAACCTACTGCCTTCCC#GGGAAGGTGTGATCGTTGA#.....((((.(((.((((((((#)))))))))))...)))).	1703	1722	1.0	-17.8	0	0.1235459	0.647	0.34939357499999996	-0.296276182	-15.764946029298986	15	19	11	3UTR	MIRT720838	0	0
hsa-let-7b-3p	NM_198281	GPRIN3	CTATACAACCTACTGCCTTCCC#GGGAAGCAGAGGTTGC#.....((((((.(((.((((((#))))))))))))))).	10665	10681	1.0	-22.0	0	4.401601e-05	0.441	0.0	0.0	-17.245452033350368	15	16	15	3UTR	MIRT612925	0	1
hsa-let-7b-3p	NM_001195798	LDLR	CTATACAACCTACTGCCTTCCC#GGAGGTGGAGGTTGC#.....((((((.((((((((..#)))))))))))))).	4469	4484	1.0	-19.5	0	0.01772118	0.368	-0.04854325000000002	0.0057196875000000355	-17.012402953046756	14	15	14	3UTR	MIRT149841	0	0
hsa-let-7b-3p	NM_001195799	LDLR	CTATACAACCTACTGCCTTCCC#GGAGGTGGAGGTTGC#.....((((((.((((((((..#)))))))))))))).	4352	4367	1.0	-19.5	0	0.01772118	0.368	-0.04854325000000002	0.0057196875000000355	-17.012402953046756	14	15	14	3UTR	MIRT149841	0	0
hsa-let-7b-3p	NM_001195800	LDLR	CTATACAACCTACTGCCTTCCC#GGAGGTGGAGGTTGC#.....((((((.((((((((..#)))))))))))))).	3971	3986	1.0	-19.5	0	0.01772118	0.368	-0.04854325000000002	0.0057196875000000355	-17.012402953046756	14	15	14	3UTR	MIRT149841	0	0
hsa-let-7b-3p	NM_001195803	LDLR	CTATACAACCTACTGCCTTCCC#GGAGGTGGAGGTTGC#.....((((((.((((((((..#)))))))))))))).	3941	3956	1.0	-19.5	0	0.01772118	0.368	-0.04854325000000002	0.0057196875000000355	-17.012402953046756	14	15	14	3UTR	MIRT149841	0	0
hsa-let-7b-3p	NM_001199619	NCOA7	CTATACAACCTACTGCCTTCCC#GGGAGGGACCTAGTGGGATGTGATTAGA#(((((((.((((((((((((((#)))))))...))))))).))))..))).	6242	6270	1.0	-23.7	1	0.05061422	0.441	0.10217099999999998	0.010147025000000018	-6.251209375382295	21	28	7	3UTR	MIRT543945	0	0
hsa-let-7b-3p	NM_001199621	NCOA7	CTATACAACCTACTGCCTTCCC#GGGAGGGACCTAGTGGGATGTGATTAGA#(((((((.((((((((((((((#)))))))...))))))).))))..))).	5762	5790	1.0	-23.7	1	0.05061422	0.441	0.10217099999999998	0.010147025000000018	-6.251209375382295	21	28	7	3UTR	MIRT543945	0	0
hsa-let-7b-3p	NM_001199622	NCOA7	CTATACAACCTACTGCCTTCCC#GGGAGGGACCTAGTGGGATGTGATTAGA#(((((((.((((((((((((((#)))))))...))))))).))))..))).	3777	3805	1.0	-23.7	1	0.05061422	0.441	0.10217099999999998	0.010147025000000018	-6.251209375382295	21	28	7	3UTR	MIRT543945	0	0
hsa-let-7b-3p	NM_001242546	ANAPC16	CTATACAACCTACTGCCTTCCC#GGAGGCGGAGGTTGC#.....((((((.((((((((..#)))))))))))))).	2773	2788	1.0	-22.1	0	4.918259e-05	0.471	-0.05004925000000002	-0.0008171749999999929	-17.012402953046756	14	15	14	3UTR	MIRT705712	0	1
hsa-let-7b-3p	NM_001242548	ANAPC16	CTATACAACCTACTGCCTTCCC#GGAGGCGGAGGTTGC#.....((((((.((((((((..#)))))))))))))).	2306	2321	1.0	-22.1	0	4.918259e-05	0.471	-0.05004925000000002	-0.0008171749999999929	-17.012402953046756	14	15	14	3UTR	MIRT705712	0	1
hsa-let-7b-3p	NM_001278462	MDM2	CTATACAACCTACTGCCTTCCC#GGGAGGTAGCTGGGA#........(((((((((((((.#))))))))).)))).	5670	5685	1.0	-19.7	0	0.003342451	0.456	0.0	0.0	-19.423879868695398	13	15	9	3UTR	MIRT573533	0	1
hsa-let-7b-3p	NM_030650	LNPK	CTATACAACCTACTGCCTTCCC#GAACACGGGAGGCAGAGGTTGC#.....((((((.(((((((((.#.))))))))))))))).	5660	5682	1.0	-26.4	0	0.0009907242	0.456	0.8329500444444444	1.158129725	-17.012402953046756	15	17	15	3UTR	MIRT038997	0	1
hsa-let-7b-3p	NM_001145339	MDM2	CTATACAACCTACTGCCTTCCC#GGGAGGTAGCTGGGA#........(((((((((((((.#))))))))).)))).	6272	6287	1.0	-19.7	0	0.003342451	0.456	-0.19141740714285713	0.0010028437499999543	-19.423879868695398	13	15	9	3UTR	MIRT573533	0	1
hsa-let-7b-3p	NM_001145340	MDM2	CTATACAACCTACTGCCTTCCC#GGGAGGTAGCTGGGA#........(((((((((((((.#))))))))).)))).	5592	5607	1.0	-19.7	0	0.003342451	0.456	-0.19141740714285713	0.0010028437499999543	-19.423879868695398	13	15	9	3UTR	MIRT573533	0	1
hsa-let-7b-3p	NM_001146156	GSK3B	CTATACAACCTACTGCCTTCCC#AAGGACTGTGGGTTGTATAC#.((((((((((((.(((((...#)))).).)))))))))))).	6820	6840	1.0	-20.9	1	0.008441502	0.721	1.6228523441666667	1.59764937825	-4.650164754877524	17	20	12	3UTR	MIRT120264	0	1
hsa-let-7b-3p	NM_001170765	LCOR	CTATACAACCTACTGCCTTCCC#GGGGAGGGAGAGGTGTTGGG#(((.((.((((.((.(((((((#))))))).))))))))))).	3031	3051	1.0	-22.4	0	0.009610744	0.676	0.19893382142857144	0.8012660699999999	-12.595536125879162	18	20	11	3UTR	MIRT057682	0	1
hsa-let-7b-3p	NM_001170765	LCOR	CTATACAACCTACTGCCTTCCC#GGGAAGGTGGTGGAAAATGTGC#...((((..(((((((((((((#)))))))))))))....)))).	2462	2484	1.0	-22.3	0	0.00183628	0.529	1.8696756923076923	2.1884892799999998	-9.884564781105134	17	22	13	3UTR	MIRT057682	0	1
hsa-let-7b-3p	NM_005023	PGGT1B	CTATACAACCTACTGCCTTCCC#GGGAGGGTGGGGGGATTTGTAG#...((((((((.((((((((((#)))))))))).)))..))))).	1173	1195	1.0	-22.9	0	8.069461e-05	0.588	0.21868349999999998	0.11352479624999999	-9.861343503275094	18	22	10	3UTR	MIRT566463	0	0
hsa-let-7b-3p	NM_005859	PURA	CTATACAACCTACTGCCTTCCC#GGGGGGGGAGAGGTGGTGTT#..((((.((((.((.(((((((#))))))).)))))).)))).	10248	10268	1.0	-23.0	0	0.01265317	0.544	-0.12573308571428574	1.2525869199999997	-10.582940124090598	17	20	7	3UTR	MIRT654588	0	1
hsa-let-7b-3p	NM_007099	ACP1	CTATACAACCTACTGCCTTCCC#GAGTCTACCTCTTCAGTAGGTTTGTGTGGA#(((((((((((((((.......#.))))))))).)))))).	851	881	1.0	-19.7	1	0.04512395	0.456	-0.037928750000000004	-0.24602376625	-4.1706235265052785	15	18	9	3UTR	MIRT551900	0	0
hsa-let-7b-3p	NM_002093	GSK3B	CTATACAACCTACTGCCTTCCC#AAGGACTGTGGGTTGTATAC#.((((((((((((.(((((...#)))).).)))))))))))).	6859	6879	1.0	-20.9	1	0.008441502	0.721	0.0	0.0	-4.650164754877524	17	20	12	3UTR	MIRT120264	0	1
hsa-let-7b-3p	NM_002392	MDM2	CTATACAACCTACTGCCTTCCC#GGGAGGTAGCTGGGA#........(((((((((((((.#))))))))).)))).	6432	6447	1.0	-19.7	0	0.003342451	0.456	0.0	0.0	-19.423879868695398	13	15	9	3UTR	MIRT573533	0	1
hsa-let-7b-3p	NM_002414	CD99	CTATACAACCTACTGCCTTCCC#GGGGGGGCGGTTTCCCATGGGATGTGA#...((((.((((((((((((((#))))))))))).......))).)))).	858	885	1.0	-22.7	0	0.0001492685	0.426	0.0	0.0	-8.82817512285937	18	27	11	3UTR	MIRT610201	0	0
hsa-let-7b-3p	NM_003468	FZD5	CTATACAACCTACTGCCTTCCC#GAGGTAGTGGGTGGTT#....((.((((((((((((...#)))))))))))).)).	3504	3520	1.0	-19.6	0	0.0002724358	0.544	0.0	0.0	-11.090249003509248	14	16	12	3UTR	MIRT523592	0	0
hsa-let-7b-3p	NM_004300	ACP1	CTATACAACCTACTGCCTTCCC#CAGTAGGTTTGTGTGGA#(((((((((((((((.......#))))))))).)))))).	864	881	1.0	-19.6	1	0.04512395	0.456	0.0	0.0	-4.1706235265052785	15	17	9	3UTR	MIRT551900	0	0
hsa-let-7b-3p	NM_032440	LCOR	CTATACAACCTACTGCCTTCCC#GGGGAGGGAGAGGTGTTGGG#(((.((.((((.((.(((((((#))))))).))))))))))).	3099	3119	1.0	-22.4	0	0.009610744	0.676	0.19893382142857144	0.8012660699999999	-12.595536125879162	18	20	11	3UTR	MIRT057682	0	1
hsa-let-7b-3p	NM_032440	LCOR	CTATACAACCTACTGCCTTCCC#GGGAAGGTGGTGGAAAATGTGC#...((((..(((((((((((((#)))))))))))))....)))).	2530	2552	1.0	-22.3	0	0.00183628	0.529	1.8696756923076923	2.1884892799999998	-9.884564781105134	17	22	13	3UTR	MIRT057682	0	1
hsa-let-7b-3p	NM_080626	BRI3BP	CTATACAACCTACTGCCTTCCC#GGGAGAATTGTATGAACCTGGGAGGCAGAGGTTGC#.....((((((.(((((((((.#.))))))))))))))).	4909	4944	1.0	-26.1	0	8.796632e-05	0.485	-0.10418544444444443	-0.023066437499999988	-17.012402953046756	15	17	15	3UTR	MIRT538897	0	0
hsa-let-7b-3p	NM_080626	BRI3BP	CTATACAACCTACTGCCTTCCC#GGGAGGCGGAGGTTGC#.....((((((.(((((((((.#))))))))))))))).	3066	3082	1.0	-25.4	0	0.001499951	0.456	-0.28004477777777775	0.037930751249999964	-17.012402953046756	15	16	15	3UTR	MIRT538897	0	0
hsa-let-7b-3p	NM_134260	RORA	CTATACAACCTACTGCCTTCCC#GGAAGGTACGTTGGGAGGTATT#..((((..(((((((((((((.#)))))))).)).)))..)))).	2577	2599	1.0	-19.9	0	0.00223952	0.662	5.346599333333333	3.999351587500001	-8.81432218342424	17	22	8	3UTR	MIRT193467	0	1
hsa-let-7b-3p	NM_134261	RORA	CTATACAACCTACTGCCTTCCC#GGAAGGTACGTTGGGAGGTATT#..((((..(((((((((((((.#)))))))).)).)))..)))).	2406	2428	1.0	-19.9	0	0.00223952	0.662	5.428685333333333	5.553867	-8.81432218342424	17	22	8	3UTR	MIRT193467	0	1
hsa-let-7b-3p	NM_134262	RORA	CTATACAACCTACTGCCTTCCC#GGAAGGTACGTTGGGAGGTATT#..((((..(((((((((((((.#)))))))).)).)))..)))).	2266	2288	1.0	-19.9	0	0.00223952	0.662	4.268528	4.408758600000001	-8.81432218342424	17	22	8	3UTR	MIRT193467	0	1
hsa-let-7b-3p	NM_134262	RORA	CTATACAACCTACTGCCTTCCC#GGAAGGAGTGTGTGTGTGTGT#.((((((((.((((.((((((.#)))))))))).)).)))))).	4975	4996	1.0	-18.7	1	0.7882295	0.471	5.085280000000001	2.4366495375	-5.771280865935932	18	21	10	3UTR	MIRT193467	0	1
hsa-let-7b-3p	NM_134442	CREB1	CTATACAACCTACTGCCTTCCC#GGGGGGGTGGCATTTGTATAA#.(((((((....((((((((((#))))))))))...))))))).	4355	4376	1.0	-20.2	1	0.01824214	0.735	1.3371678	2.5488560412500005	-12.263798748937765	17	21	10	3UTR	MIRT524354	0	1
hsa-let-7b-3p	NM_145034	TOR1AIP2	CTATACAACCTACTGCCTTCCC#GGAAGGAGGTTGATAA#.(((.((((((....((((((.#))))))))))))))).	1877	1893	1.0	-16.7	0	0.01706684	0.662	0.5002196	0.05758737875	-14.14058541220323	15	16	15	3UTR	MIRT182780	0	1
hsa-let-7b-3p	NM_001297763	ZNF546	CTATACAACCTACTGCCTTCCC#GGAAGGCCCTGTGGGTGTAAGA#((.(((.((((((.(((((((.#)))))))...))))))))))).	3932	3954	1.0	-22.7	0	0.0002184431	0.603	0.3253763942857143	0.013346702999999972	-7.895640372899838	18	22	11	3UTR	MIRT717924	0	0
hsa-let-7b-3p	NM_001305009	LNPK	CTATACAACCTACTGCCTTCCC#GAACACGGGAGGCAGAGGTTGC#.....((((((.(((((((((.#.))))))))))))))).	5831	5853	1.0	-26.4	0	0.0009907242	0.456	0.6441649	0.8130089462500001	-17.012402953046756	15	17	15	3UTR	MIRT038997	0	1
hsa-let-7b-3p	NM_001305011	LNPK	CTATACAACCTACTGCCTTCCC#GAACACGGGAGGCAGAGGTTGC#.....((((((.(((((((((.#.))))))))))))))).	5430	5452	1.0	-26.4	0	0.0009907242	0.456	1.6352806666666664	2.2444632587499997	-17.012402953046756	15	17	15	3UTR	MIRT038997	0	1
hsa-let-7b-3p	NM_001321367	CD99	CTATACAACCTACTGCCTTCCC#GGCGTGAACCCTGGAGGCGGAGGTTGC#.....((((((.((((((((..#.)))))))))))))).	3300	3327	1.0	-22.1	0	5.246854e-06	0.368	-0.06548224999999998	-0.04384930000000002	-17.012402953046756	14	16	14	3UTR	MIRT610201	0	0
hsa-let-7b-3p	NM_000330	RS1	CTATACAACCTACTGCCTTCCC#GGGGGGGGGGTGGGGGGA#.....(..((((((.(((((((#))))))).))))))..).	2274	2292	1.0	-24.7	0	0.03055126	0.338	0.0	0.0	-18.258370667752985	14	18	7	3UTR	MIRT682258	0	0
hsa-let-7b-3p	NM_000527	LDLR	CTATACAACCTACTGCCTTCCC#GGAGGTGGAGGTTGC#.....((((((.((((((((..#)))))))))))))).	4475	4490	1.0	-19.5	0	0.01772118	0.368	0.0	0.0	-17.012402953046756	14	15	14	3UTR	MIRT149841	0	0
hsa-let-7b-3p	NM_000668	ADH1B	CTATACAACCTACTGCCTTCCC#GGGAGGCGGAGGTTGC#.....((((((.(((((((((.#))))))))))))))).	2939	2955	1.0	-25.4	0	0.000949862	0.412	0.0	0.0	-17.012402953046756	15	16	15	3UTR	MIRT518101	0	0
hsa-let-7b-3p	NM_001032282	KLF10	CTATACAACCTACTGCCTTCCC#GGAGGTAGTTGGGTA#.......(((((((((((((..#))))))))).)))).	2714	2729	1.0	-18.0	0	0.004217721	0.662	0.0	0.0	-17.110244939514768	13	15	9	3UTR	MIRT702372	0	1
hsa-let-7b-5p	NM_018195	NKAPD1	TGAGGTAGTAGGTTGTGTGGTT#TCATACAACCTGGAATTTCT#.(((((..((((((((((((..#))))))))))))..))))).	3634	3654	0.9538461538461539	-20.1	0	0.04421236	0.721	1.0568039999999999	1.4645801025806455	-7.650646301409068	17	20	12	3UTR	MIRT264691	1	0
hsa-let-7b-5p	NM_007085	FSTL1	TGAGGTAGTAGGTTGTGTGGTT#ACCCACAATAATTCTGCCTCC#.(((((((...((((((.(((.#)))))))))....))))))).	4618	4639	0.9538461538461539	-21.4	1	0.08609403	0.603	0.7250157428571428	2.01670093	-8.91699543934141	16	21	9	3UTR	MIRT051922	0	0
hsa-let-7b-5p	NM_001082970	NKAPD1	TGAGGTAGTAGGTTGTGTGGTT#TCATACAACCTGGAATTTCT#.(((((..((((((((((((..#))))))))))))..))))).	3631	3651	0.9538461538461539	-20.1	0	0.04421236	0.721	1.0568039999999999	1.4645801025806455	-7.650646301409068	17	20	12	3UTR	MIRT264691	1	0
hsa-let-7b-5p	NM_001301017	NKAPD1	TGAGGTAGTAGGTTGTGTGGTT#TCATACAACCTGGAATTTCT#.(((((..((((((((((((..#))))))))))))..))))).	3073	3093	0.9538461538461539	-20.1	0	0.04421236	0.721	1.0568039999999999	1.4645801025806455	-7.650646301409068	17	20	12	3UTR	MIRT264691	1	0
hsa-let-7b-5p	NM_001301019	NKAPD1	TGAGGTAGTAGGTTGTGTGGTT#TCATACAACCTGGAATTTCT#.(((((..((((((((((((..#))))))))))))..))))).	3117	3137	0.9538461538461539	-20.1	0	0.04421236	0.721	1.0568039999999999	1.4645801025806455	-7.650646301409068	17	20	12	3UTR	MIRT264691	1	0
hsa-let-7b-5p	NM_001330470	MTUS1	TGAGGTAGTAGGTTGTGTGGTT#ACCACCAACTCTGCTCAGCCC#...((((((((((((.(((((.#))))))))).)))))..))).	1789	1810	0.9615384615384616	-20.2	0	0.05470278	0.529	2.9295359600000004	2.4450043537500004	-6.747589273982352	17	21	9	3UTR	MIRT052348	1	1
hsa-let-7b-5p	NM_001367287	PGM3	TGAGGTAGTAGGTTGTGTGGTT#ACAATGCAGCCTACTGGATTGTCTCT#.(((((((((((((((((.((.#)).))))))))))))).....)))).	1954	1980	0.9615384615384616	-19.5	1	0.0004473195	0.676	1.9343268818181818	1.4408149645000001	-3.793324837357118	19	26	13	3UTR	MIRT032419	0	0
hsa-let-7b-5p	NM_181698	CCNY	TGAGGTAGTAGGTTGTGTGGTT#AACGACACAATTTGTTACTTTAA#((((((((((((((((((.(((#))).)))))))))))))))))).	3867	3890	0.9615384615384616	-21.0	1	0.01264233	0.779	0.0	0.0	-3.937574446201665	21	23	18	3UTR	MIRT032307	1	1
hsa-let-7b-5p	NM_198400	NEDD4	TGAGGTAGTAGGTTGTGTGGTT#AGCCATGTGAACTGAAGCAGCTTACTTAACCTCT#.(((((((((((((((((((((#))))))..........))))))))))..))))).	5912	5946	0.9615384615384616	-22.8	1	0.03440818	0.603	4.349604745454546	1.88497166875	-3.793324837357118	21	34	10	3UTR	MIRT001612	0	0
hsa-let-7b-5p	NM_017990	PDPR	TGAGGTAGTAGGTTGTGTGGTT#CCACATAGCCTCTCCTTC#.((((.((.(((((((((((..#))))))))))))))))).	8122	8140	0.9615384615384616	-23.1	0	0.0001799829	0.412	-0.36089419454545457	-0.14387526275	-6.750673256795928	17	18	17	3UTR	MIRT032497	1	1
hsa-let-7b-5p	NM_001195102	GSR	TGAGGTAGTAGGTTGTGTGGTT#GCTATTTCAGCTCACCACAACCTCTGCCTCC#.(((((((.(((((((((((((#.))).))).)))))))))))))).	1907	1938	0.9615384615384616	-26.5	1	0.006878971	0.441	4.403118866666667	4.734992278749999	-4.849714495602881	20	24	14	3UTR	MIRT032416	0	0
hsa-let-7b-5p	NM_001195103	GSR	TGAGGTAGTAGGTTGTGTGGTT#GCTATTTCAGCTCACCACAACCTCTGCCTCC#.(((((((.(((((((((((((#.))).))).)))))))))))))).	1835	1866	0.9615384615384616	-26.5	1	0.006878971	0.441	4.308952933333334	4.59066417375	-4.849714495602881	20	24	14	3UTR	MIRT032416	0	0
hsa-let-7b-5p	NM_001199918	PGM3	TGAGGTAGTAGGTTGTGTGGTT#ACAATGCAGCCTACTGGATTGTCTCT#.(((((((((((((((((.((.#)).))))))))))))).....)))).	1615	1641	0.9615384615384616	-19.5	1	0.0004473195	0.676	2.5546977818181817	3.3585402500000003	-3.793324837357118	19	26	13	3UTR	MIRT032419	0	0
hsa-let-7b-5p	NM_001243203	RANBP6	TGAGGTAGTAGGTTGTGTGGTT#GACCTTGGTGATAACCTGTGCTTCAA#(((((((.((((((((..((((#))))......))))))))))))))).	2410	2436	0.9615384615384616	-18.9	1	0.002738064	0.603	6.068963999999999	5.3841370375	-6.251209375382295	19	26	15	3UTR	MIRT032217	0	0
hsa-let-7b-5p	NM_001278518	MDM4	TGAGGTAGTAGGTTGTGTGGTT#CCACACACCTCGGCCTCC#.(((((.(.(((.(((((((..#))))))))))).))))).	4013	4031	0.9615384615384616	-22.8	0	0.07012686	0.441	0.0	0.0	-7.682531643140443	16	18	11	3UTR	MIRT052186	1	1
hsa-let-7b-5p	NM_001282852	CCNY	TGAGGTAGTAGGTTGTGTGGTT#AACGACACAATTTGTTACTTTAA#((((((((((((((((((.(((#))).)))))))))))))))))).	4177	4200	0.9615384615384616	-21.0	1	0.01264233	0.779	0.2026592222222222	0.6962251299749999	-3.937574446201665	21	23	18	3UTR	MIRT032307	1	1
hsa-let-7b-5p	NM_001282853	CCNY	TGAGGTAGTAGGTTGTGTGGTT#AACGACACAATTTGTTACTTTAA#((((((((((((((((((.(((#))).)))))))))))))))))).	4315	4338	0.9615384615384616	-21.0	1	0.01264233	0.779	0.0	0.0	-3.937574446201665	21	23	18	3UTR	MIRT032307	1	1
hsa-let-7b-5p	NM_001284338	NEDD4	TGAGGTAGTAGGTTGTGTGGTT#AGCCATGTGAACTGAAGCAGCTTACTTAACCTCT#.(((((((((((((((((((((#))))))..........))))))))))..))))).	6133	6167	0.9615384615384616	-22.8	1	0.03440818	0.603	3.963171551515152	2.3100482424999997	-3.793324837357118	21	34	10	3UTR	MIRT001612	0	0
hsa-let-7b-5p	NM_001284339	NEDD4	TGAGGTAGTAGGTTGTGTGGTT#AGCCATGTGAACTGAAGCAGCTTACTTAACCTCT#.(((((((((((((((((((((#))))))..........))))))))))..))))).	6080	6114	0.9615384615384616	-22.8	1	0.03440818	0.603	4.349604745454546	1.88497166875	-3.793324837357118	21	34	10	3UTR	MIRT001612	0	0
hsa-let-7b-5p	NM_001284430	UTP15	TGAGGTAGTAGGTTGTGTGGTT#AGCCGCATGCCTGTTCCCTCAG#(((((.((((((.(((((((((#))))))))))))))).))))).	4799	4821	0.9615384615384616	-22.3	0	0.01428915	0.544	-0.07847933333333332	-0.08324796450000004	-7.127663820060954	20	22	15	3UTR	MIRT032450	1	0
hsa-let-7b-5p	NM_001284431	UTP15	TGAGGTAGTAGGTTGTGTGGTT#AGCCGCATGCCTGTTCCCTCAG#(((((.((((((.(((((((((#))))))))))))))).))))).	4683	4705	0.9615384615384616	-22.3	0	0.01428915	0.544	-0.07847933333333332	-0.08324796450000004	-7.127663820060954	20	22	15	3UTR	MIRT032450	1	0
hsa-let-7b-5p	NM_024955	FOXRED2	TGAGGTAGTAGGTTGTGTGGTT#GGCTCACTGCAACTTCTGCCTCC#.(((((((.(((((((((((((#))).))).)))))))))))))).	4152	4175	0.9615384615384616	-23.0	1	0.01332338	0.456	4.6750616	5.078788378737499	-4.849714495602881	20	23	14	3UTR	MIRT052050	0	0
hsa-let-7b-5p	NM_001145160	TPM4	TGAGGTAGTAGGTTGTGTGGTT#CCACCACCCTACTCCTA#..(((.((((((.((.((((..#)))))).))))))))).	2437	2454	0.9615384615384616	-20.1	0	0.6352166	0.485	1.0527133333333334	1.3615399049999997	-8.380139173535193	15	17	9	3UTR	MIRT052131	0	0
hsa-let-7b-5p	NM_004998	MYO1E	TGAGGTAGTAGGTTGTGTGGTT#GATCAAACGATCCTCCTGCCTCAG#((((((((.(((((((.(((((#))))).)))).))).)))))))).	6600	6624	0.9615384615384616	-23.1	1	0.0001070216	0.485	4.081474375	5.4254175572499985	-4.993964104447428	20	24	8	3UTR	MIRT032300	0	0
hsa-let-7b-5p	NM_012416	RANBP6	TGAGGTAGTAGGTTGTGTGGTT#GACCTTGGTGATAACCTGTGCTTCAA#(((((((.((((((((..((((#))))......))))))))))))))).	3525	3551	0.9615384615384616	-18.9	1	0.002738064	0.603	6.64834625	5.1470708451250005	-6.251209375382295	19	26	15	3UTR	MIRT032217	0	0
hsa-let-7b-5p	NM_002657	PLAGL2	TGAGGTAGTAGGTTGTGTGGTT#ACCATGATAACCTAGTGCCTCC#.((((((.(((((((((((((.#))))).)))))))).)))))).	5210	5232	0.9615384615384616	-26.7	1	0.01134484	0.515	4.922046285714286	4.997180049999999	-6.106959766537749	19	22	8	3UTR	MIRT005038	1	1
hsa-let-7b-5p	NM_001102371	FOXRED2	TGAGGTAGTAGGTTGTGTGGTT#GGCTCACTGCAACTTCTGCCTCC#.(((((((.(((((((((((((#))).))).)))))))))))))).	4055	4078	0.9615384615384616	-23.0	1	0.01332338	0.456	5.364199628866667	4.0092728179125	-4.849714495602881	20	23	14	3UTR	MIRT052050	0	0
hsa-let-7b-5p	NM_032175	UTP15	TGAGGTAGTAGGTTGTGTGGTT#AGCCGCATGCCTGTTCCCTCAG#(((((.((((((.(((((((((#))))))))))))))).))))).	4854	4876	0.9615384615384616	-22.3	0	0.01428915	0.544	-0.07847933333333332	-0.08324796450000004	-7.127663820060954	20	22	15	3UTR	MIRT032450	1	0
hsa-let-7b-5p	NM_032338	LLPH	TGAGGTAGTAGGTTGTGTGGTT#CCGCTGCAACCTCCACCTCC#.(((((.(.(((((((((((..#)))).)))))))).))))).	2453	2473	0.9615384615384616	-22.6	0	0.04334637	0.382	0.24988965	-0.144017189375	-6.3934010304742	17	20	8	3UTR	MIRT032394	0	0
hsa-let-7b-5p	NM_032812	PLXDC2	TGAGGTAGTAGGTTGTGTGGTT#TCACTGCAACCTCCGCCTCC#.(((((.(.(((((((((((..#)))).)))))))).))))).	9215	9235	0.9615384615384616	-21.0	0	0.004851534	0.397	-0.04578641666666666	0.028012412500000014	-6.3934010304742	17	20	8	3UTR	MIRT032203	0	0
hsa-let-7b-5p	NM_133370	YTHDC1	TGAGGTAGTAGGTTGTGTGGTT#GACCTCAAGTGACCTCACCTGCCTCAG#((((((((.(((((.((.((((#)))).))...)))))...)))))))).	4627	4654	0.9615384615384616	-22.4	1	0.007327082	0.456	4.501975	5.591394510624999	-5.729413664698063	19	27	8	3UTR	MIRT052150	0	0
hsa-let-7b-5p	NM_145012	CCNY	TGAGGTAGTAGGTTGTGTGGTT#AACGACACAATTTGTTACTTTAA#((((((((((((((((((.(((#))).)))))))))))))))))).	4252	4275	0.9615384615384616	-21.0	1	0.01264233	0.779	0.4430237185	0.5892905941375002	-3.937574446201665	21	23	18	3UTR	MIRT032307	1	1
hsa-let-7b-5p	NM_001322117	PDPR	TGAGGTAGTAGGTTGTGTGGTT#CCACATAGCCTCTCCTTC#.((((.((.(((((((((((..#))))))))))))))))).	8779	8797	0.9615384615384616	-23.1	0	0.0001799829	0.412	-0.36089419454545457	-0.14387526275	-6.750673256795928	17	18	17	3UTR	MIRT032497	1	1
hsa-let-7b-5p	NM_001322118	PDPR	TGAGGTAGTAGGTTGTGTGGTT#CCACATAGCCTCTCCTTC#.((((.((.(((((((((((..#))))))))))))))))).	8459	8477	0.9615384615384616	-23.1	0	0.0001799829	0.412	-0.36089419454545457	-0.14387526275	-6.750673256795928	17	18	17	3UTR	MIRT032497	1	1
hsa-let-7b-5p	NM_001010866	TMEM201	TGAGGTAGTAGGTTGTGTGGTT#AGCCACTCACCACTGCTGCCA#...(((((((((.((.((((((#)))))).)).).)))))))).	1408	1429	0.9615384615384616	-22.6	0	0.005784598	0.368	0.0	0.0	-8.036719886648596	17	21	8	3UTR	MIRT032231	0	0
hsa-let-7b-5p	NM_018054	ARHGAP17	TGAGGTAGTAGGTTGTGTGGTT#GCCTACTCTCTGCTACCTGGA#(.((((((((((..(((.(((.#))))))..)))))))))).).	2930	2951	0.9743589743589743	-20.4	1	0.007510317	0.5	0.0	0.0	-7.247220858403485	17	21	10	3UTR	MIRT032476	0	0
hsa-let-7b-5p	NM_001006634	ARHGAP17	TGAGGTAGTAGGTTGTGTGGTT#GCCTACTCTCTGCTACCTGGA#(.((((((((((..(((.(((.#))))))..)))))))))).).	3164	3185	0.9743589743589743	-20.4	1	0.007510317	0.5	0.0	0.0	-7.247220858403485	17	21	10	3UTR	MIRT032476	0	0
hsa-let-7b-5p	NM_014672	PRORP	TGAGGTAGTAGGTTGTGTGGTT#TCACTGCAACCTCTGCCTCC#.(((((((.(((((((((((..#)))).)))))))))))))).	5661	5681	0.9807692307692307	-25.3	1	0.00142087	0.485	-0.18257196666666667	-0.11463955374999997	-4.849714495602881	18	20	14	3UTR	MIRT549802	1	0
hsa-let-7b-5p	NM_017723	TOR4A	TGAGGTAGTAGGTTGTGTGGTT#TCACTGCAACCTCTGCCTCC#.(((((((.(((((((((((..#)))).)))))))))))))).	3802	3822	0.9807692307692307	-25.3	1	0.000784196	0.426	0.17982141666666665	-0.15784977499999997	-4.849714495602881	18	20	14	3UTR	MIRT052330	0	0
hsa-let-7b-5p	NM_001256678	PRORP	TGAGGTAGTAGGTTGTGTGGTT#TCACTGCAACCTCTGCCTCC#.(((((((.(((((((((((..#)))).)))))))))))))).	5613	5633	0.9807692307692307	-25.3	1	0.00142087	0.485	-0.18257196666666667	-0.11463955374999997	-4.849714495602881	18	20	14	3UTR	MIRT549802	1	0
hsa-let-7b-5p	NM_001256679	PRORP	TGAGGTAGTAGGTTGTGTGGTT#TCACTGCAACCTCTGCCTCC#.(((((((.(((((((((((..#)))).)))))))))))))).	5108	5128	0.9807692307692307	-25.3	1	0.00142087	0.485	-0.18257196666666667	-0.11463955374999997	-4.849714495602881	18	20	14	3UTR	MIRT549802	1	0
hsa-let-7b-5p	NM_001256680	PRORP	TGAGGTAGTAGGTTGTGTGGTT#TCACTGCAACCTCTGCCTCC#.(((((((.(((((((((((..#)))).)))))))))))))).	4656	4676	0.9807692307692307	-25.3	1	0.00142087	0.485	-0.18257196666666667	-0.11463955374999997	-4.849714495602881	18	20	14	3UTR	MIRT549802	1	0
hsa-let-7b-5p	NM_001256681	PRORP	TGAGGTAGTAGGTTGTGTGGTT#TCACTGCAACCTCTGCCTCC#.(((((((.(((((((((((..#)))).)))))))))))))).	4608	4628	0.9807692307692307	-25.3	1	0.00142087	0.485	0.0	0.0	-4.849714495602881	18	20	14	3UTR	MIRT549802	1	0
hsa-let-7b-5p	NM_012474	UCK2	TGAGGTAGTAGGTTGTGTGGTT#CTGGGCGTTCTGCTGCCTTC#.(((((((((((.(((.(((..#))).))).))))))))))).	4540	4560	0.9807692307692307	-21.1	1	0.02175472	0.456	-0.43134949090909097	-0.29052492999999996	-5.08245545002336	17	20	11	3UTR	MIRT032462	0	0
hsa-let-7b-5p	NM_003123	SPN	TGAGGTAGTAGGTTGTGTGGTT#TCACTGCAACCTCTGCCTCC#.(((((((.(((((((((((..#)))).)))))))))))))).	1502	1522	0.9807692307692307	-25.3	1	0.01763019	0.471	0.0	0.0	-4.849714495602881	18	20	14	3UTR	MIRT052328	0	0
hsa-let-7b-5p	NM_003457	ZNF207	TGAGGTAGTAGGTTGTGTGGTT#TCACTGCAACCTCTGCCTCC#.(((((((.(((((((((((..#)))).)))))))))))))).	5775	5795	0.9807692307692307	-25.3	1	0.004616698	0.412	0.0	0.0	-4.849714495602881	18	20	14	3UTR	MIRT052265	0	0
hsa-let-7b-5p	NM_001098507	ZNF207	TGAGGTAGTAGGTTGTGTGGTT#TCACTGCAACCTCTGCCTCC#.(((((((.(((((((((((..#)))).)))))))))))))).	5823	5843	0.9807692307692307	-25.3	1	0.004616698	0.412	-0.009867383333333332	0.053755190000000015	-4.849714495602881	18	20	14	3UTR	MIRT052265	0	0
hsa-let-7b-5p	NM_001029858	SLC35F1	TGAGGTAGTAGGTTGTGTGGTT#CCACATGGCCTTTTTGCCTG#..((((((.(((((((((((..#)))))))))))..)))))).	3608	3628	0.9807692307692307	-22.9	1	0.001019049	0.456	0.0	0.0	-6.013390377618052	17	20	11	3UTR	MIRT052251	0	0
hsa-let-7b-5p	NM_001030288	SPN	TGAGGTAGTAGGTTGTGTGGTT#TCACTGCAACCTCTGCCTCC#.(((((((.(((((((((((..#)))).)))))))))))))).	1550	1570	0.9807692307692307	-25.3	1	0.01763019	0.471	0.0	0.0	-4.849714495602881	18	20	14	3UTR	MIRT052328	0	0
hsa-let-7b-5p	NM_001032293	ZNF207	TGAGGTAGTAGGTTGTGTGGTT#TCACTGCAACCTCTGCCTCC#.(((((((.(((((((((((..#)))).)))))))))))))).	5730	5750	0.9807692307692307	-25.3	1	0.004616698	0.412	0.0	0.0	-4.849714495602881	18	20	14	3UTR	MIRT052265	0	0
hsa-let-7b-5p	NM_001128930	ENTPD4	TGAGGTAGTAGGTTGTGTGGTT#GACCCCATGCACAGCCTGCCGAGTCCTCT#.((((..(((((((((((((((#))))....))))))))))).....)))).	3288	3317	0.9846153846153847	-24.7	0	0.02439102	0.412	0.5522600526315791	0.37561148975000014	-7.2379701334214825	19	29	11	3UTR	MIRT051917	0	0
hsa-let-7b-5p	NM_001363738	MGME1	TGAGGTAGTAGGTTGTGTGGTT#CACATCAGCCCACTACCG#...((((((.(((((((((...#)))).))))).)))))).	1422	1440	0.9914529914529915	-21.8	0	0.001305216	0.456	0.0	0.0	-7.757046662006918	15	18	6	3UTR	MIRT005230	0	0
hsa-let-7b-5p	NM_001330753	PPARGC1A	TGAGGTAGTAGGTTGTGTGGTT#ATGATACACCTACTACTCAA#(((.((((((((.(((((.((.#)).)))))))))))))))).	4781	4801	1.0	-20.3	0	0.2148888	0.588	3.7545337500000002	4.277621825000001	-8.258727333827098	18	20	16	3UTR	MIRT051970	1	0
hsa-let-7b-5p	NM_001331190	CMC1	TGAGGTAGTAGGTTGTGTGGTT#AATGGCATAAATCCATTCACGAGGGCTCCAGCCTCATCACCCTATTACCTCT#.(((((((((((.((((.((((#.)))).)).)).))))))))))).	1228	1280	1.0	-24.8	1	0.4639541	0.544	-0.0006519090909091247	-0.04829357474999999	-5.08245545002336	19	24	11	3UTR	MIRT032230	0	0
hsa-let-7b-5p	NM_001348022	ZNF606	TGAGGTAGTAGGTTGTGTGGTT#AGCCACCATTTTATGCTGCCTCT#.(((((((((...((.((((((#)))))))).....))))))))).	3975	3998	1.0	-22.5	1	0.03538735	0.603	0.0	0.0	-11.48708231533368	17	23	9	3UTR	MIRT052134	0	0
hsa-let-7b-5p	NM_001348061	AR	TGAGGTAGTAGGTTGTGTGGTT#AGCCACACTCCTTGATTGCTCTCT#.(((((((((((..((((((((#)))))))).)))..))))).))).	3185	3209	1.0	-21.3	1	0.1096558	0.559	0.0	0.0	-5.9392953675437665	19	24	8	3UTR	MIRT052016	0	0
hsa-let-7b-5p	NM_001348064	AR	TGAGGTAGTAGGTTGTGTGGTT#AGCCACACTCCTTGATTGCTCTCT#.(((((((((((..((((((((#)))))))).)))..))))).))).	3102	3126	1.0	-21.3	1	0.1096558	0.559	0.0	0.0	-5.9392953675437665	19	24	8	3UTR	MIRT052016	0	0
hsa-let-7b-5p	NM_001348336	TRIP12	TGAGGTAGTAGGTTGTGTGGTT#AGCTCACTGCAGCCTCTGCCTCC#.(((((((.(((((((((((((#))).))).)))))))))))))).	3588	3611	1.0	-25.8	1	8.349548e-05	0.441	0.023671253333333322	-0.12089384325000002	-4.849714495602881	20	23	14	3UTR	MIRT032415	0	0
hsa-let-7b-5p	NM_001349999	RBFOX2	TGAGGTAGTAGGTTGTGTGGTT#GCCACAGAACCTCTCCTCT#.((((.((.(((((.((((((.#)))))).))))))))))).	6650	6669	1.0	-25.2	0	0.2435772	0.441	0.0	0.0	-7.486122817046563	17	19	11	3UTR	MIRT032498	1	1
hsa-let-7b-5p	NM_001352977	OXNAD1	TGAGGTAGTAGGTTGTGTGGTT#GCAGGACCTGGAGCTGCCTCT#.(((((((((((((.(((....#))).)))))...)))))))).	2373	2394	1.0	-23.2	1	0.0003194715	0.559	0.0	0.0	-4.528774397607753	16	21	8	3UTR	MIRT032479	0	0
hsa-let-7b-5p	NM_001353301	CYRIB	TGAGGTAGTAGGTTGTGTGGTT#AGCCAGGCCCTACTGCTTG#..((((((((((..((.(((((#))))).)))))))))))).	2507	2526	1.0	-22.2	1	5.244598e-05	0.485	0.9243095900000002	3.0230289399999997	-7.102971249558938	17	19	12	3UTR	MIRT032366	0	0
hsa-let-7b-5p	NM_001362770	CSNK2A1	TGAGGTAGTAGGTTGTGTGGTT#GGCAGGCCAGCCTGCACCCTCAG#(((((..((((((((.((.(((#)))..))))))))))..))))).	2372	2395	1.0	-21.7	0	0.0001082754	0.426	0.0	0.0	-7.615268822569644	18	23	10	3UTR	MIRT052272	1	0
hsa-let-7b-5p	NM_001362771	CSNK2A1	TGAGGTAGTAGGTTGTGTGGTT#GGCAGGCCAGCCTGCACCCTCAG#(((((..((((((((.((.(((#)))..))))))))))..))))).	2255	2278	1.0	-21.7	0	0.0001082754	0.426	0.0	0.0	-7.615268822569644	18	23	10	3UTR	MIRT052272	1	0
hsa-let-7b-5p	NM_001363041	FOXRED2	TGAGGTAGTAGGTTGTGTGGTT#GGCTCACTGCAACTTCTGCCTCC#.(((((((.(((((((((((((#))).))).)))))))))))))).	3882	3905	1.0	-23.0	1	0.01332338	0.456	0.0	0.0	-4.849714495602881	20	23	14	3UTR	MIRT052050	0	0
hsa-let-7b-5p	NM_001363042	FOXRED2	TGAGGTAGTAGGTTGTGTGGTT#GGCTCACTGCAACTTCTGCCTCC#.(((((((.(((((((((((((#))).))).)))))))))))))).	3785	3808	1.0	-23.0	1	0.01332338	0.456	1.6181931600000001	3.6752909799999998	-4.849714495602881	20	23	14	3UTR	MIRT052050	0	0
hsa-let-7b-5p	NM_001363466	FAM126A	TGAGGTAGTAGGTTGTGTGGTT#CCACATAGCTGACTCACCTCC#.((((((((.((((((((((..#)))))))))).))).))))).	7660	7681	1.0	-24.5	1	0.0572455	0.574	0.0	0.0	-5.035831305685297	18	21	10	3UTR	MIRT052001	0	0
hsa-let-7b-5p	NM_001363466	FAM126A	TGAGGTAGTAGGTTGTGTGGTT#CCACTACGGCCTACTGAAAGCCTA#..((((((((((((((((((..#)))).))))))))))....)))).	10427	10451	1.0	-23.9	1	0.003759926	0.647	0.0	0.0	-4.95700071937229	18	24	10	3UTR	MIRT052001	0	0
hsa-let-7b-5p	NM_001363491	ZC3HAV1	TGAGGTAGTAGGTTGTGTGGTT#GGCTCACTGCAACCTCTGCCTCC#.(((((((.(((((((((((((#))).))).)))))))))))))).	3780	3803	1.0	-25.7	1	0.001069534	0.368	0.0	0.0	-4.849714495602881	20	23	14	3UTR	MIRT052130	0	0
hsa-let-7b-5p	NM_001363568	UCK2	TGAGGTAGTAGGTTGTGTGGTT#CTGGGCGTTCTGCTGCCTTC#.(((((((((((.(((.(((..#))).))).))))))))))).	4778	4798	1.0	-21.1	1	0.02175472	0.456	0.0	0.0	-5.08245545002336	17	20	11	3UTR	MIRT032462	0	0
hsa-let-7b-5p	NM_001363662	PAPOLA	TGAGGTAGTAGGTTGTGTGGTT#GCCAACTCAACCTGTTGTCTTCAA#(((((((((((((((.(((((.#)))).).)))))))))).))))).	2417	2441	1.0	-20.0	1	0.01283072	0.618	0.0	0.0	-4.1706235265052785	20	24	10	3UTR	MIRT052114	0	0
hsa-let-7b-5p	NM_001363738	MGME1	TGAGGTAGTAGGTTGTGTGGTT#GGCACGCGAAATCCCAGCTATGCTACCTCT#.((((((((((((((.(.((((#.)))))))))).))))))))).	1177	1207	1.0	-20.7	1	0.03045789	0.5	0.0	0.0	-4.026373917660731	19	22	10	3UTR	MIRT005230	0	0
hsa-let-7b-5p	NM_001363748	EPHA4	TGAGGTAGTAGGTTGTGTGGTT#CCAGCCAACTTACTGCCA#...((((((((((((..(((..#)))..)))))))))))).	5241	5259	1.0	-23.6	0	0.06620635	0.603	0.0	0.0	-6.747589273982352	15	18	12	3UTR	MIRT548343	1	1
hsa-let-7b-5p	NM_001363818	MTX3	TGAGGTAGTAGGTTGTGTGGTT#AGCGCAGTCTCGGCTCACTGCAACCTCTACCTCC#.(((((((.(((((((((((((#.))).))).)))))))))))))).	3514	3548	1.0	-26.0	1	0.00175282	0.412	0.0	0.0	-4.849714495602881	20	24	14	3UTR	MIRT682447	0	0
hsa-let-7b-5p	NM_001363891	FTO	TGAGGTAGTAGGTTGTGTGGTT#GGCACGATCTCAGCTCACTGCAACCTCTGCCTCC#.(((((((.(((((((((((((#.))).))).)))))))))))))).	3720	3754	1.0	-26.1	1	0.001949262	0.426	0.0	0.0	-4.849714495602881	20	24	14	3UTR	MIRT052254	0	0
hsa-let-7b-5p	NM_001364800	RBFOX1	TGAGGTAGTAGGTTGTGTGGTT#ATCACGCAATCTGCAAACCCAG#((.(((.((((((((((((((.#))))))))))))))..))))).	4802	4824	1.0	-22.5	0	0.003250888	0.647	0.0	0.0	-7.038800455379432	19	22	14	3UTR	MIRT032440	1	1
hsa-let-7b-5p	NM_001366299	KHSRP	TGAGGTAGTAGGTTGTGTGGTT#GCCACCTTCCAACCTACCTCAC#((((((((..((..(.(((((.#))))))..))...)))))))).	2870	2892	1.0	-21.9	1	0.003934411	0.441	0.0	0.0	-8.61549018326587	16	22	8	3UTR	MIRT052159	0	0
hsa-let-7b-5p	NM_001366305	KPNA5	TGAGGTAGTAGGTTGTGTGGTT#ATCACGCTACCTGACTTCAA#((((((..(((((.(((((((.#))))))).))))))))))).	9055	9075	1.0	-19.9	0	0.02123293	0.588	0.0	0.0	-8.651735827774022	18	20	11	3UTR	MIRT502101	1	0
hsa-let-7b-5p	NM_001366305	KPNA5	TGAGGTAGTAGGTTGTGTGGTT#AATTTTCACAACCTACTCATCTGAC#(.(((((((((((((((.....#.))))))))))).)))).).	9559	9584	1.0	-20.3	1	0.1661454	0.647	0.0	0.0	-5.101250328216836	16	20	11	3UTR	MIRT502101	1	0
hsa-let-7b-5p	NM_001366306	KPNA5	TGAGGTAGTAGGTTGTGTGGTT#ATCACGCTACCTGACTTCAA#((((((..(((((.(((((((.#))))))).))))))))))).	8995	9015	1.0	-19.9	0	0.02123293	0.588	0.0	0.0	-8.651735827774022	18	20	11	3UTR	MIRT502101	1	0
hsa-let-7b-5p	NM_001366306	KPNA5	TGAGGTAGTAGGTTGTGTGGTT#AATTTTCACAACCTACTCATCTGAC#(.(((((((((((((((.....#.))))))))))).)))).).	9499	9524	1.0	-20.3	1	0.1661454	0.647	0.0	0.0	-5.101250328216836	16	20	11	3UTR	MIRT502101	1	0
hsa-let-7b-5p	NM_001366307	KPNA5	TGAGGTAGTAGGTTGTGTGGTT#ACTCACACAGCTTATTAATGCTTTG#.((((((((((((((((((((.#)).))))))))))))...)))))).	6249	6274	1.0	-20.0	1	0.003091528	0.691	0.36938462083333334	0.3000355615	-3.793324837357118	20	25	12	3UTR	MIRT502101	1	0
hsa-let-7b-5p	NM_001366307	KPNA5	TGAGGTAGTAGGTTGTGTGGTT#AATTTTCACAACCTACTCATCTGAC#(.(((((((((((((((.....#.))))))))))).)))).).	9605	9630	1.0	-20.3	1	0.1661454	0.647	0.07268600000000003	0.04919382500000004	-5.101250328216836	16	20	11	3UTR	MIRT502101	1	0
hsa-let-7b-5p	NM_001367838	TPM4	TGAGGTAGTAGGTTGTGTGGTT#CCACCACCCTACTCCTA#..(((.((((((.((.((((..#)))))).))))))))).	2386	2403	1.0	-20.1	0	0.6352166	0.485	0.0	0.0	-8.380139173535193	15	17	9	3UTR	MIRT052131	0	0
hsa-let-7b-5p	NM_001369400	RALB	TGAGGTAGTAGGTTGTGTGGTT#GCCAGACCTTCTGCTACCTCT#.(((((((((((..((.((((.#)))).))..))))))))))).	1790	1811	1.0	-25.6	1	0.0125947	0.574	0.0	0.0	-5.9392953675437665	17	21	11	3UTR	MIRT052235	1	1
hsa-let-7b-5p	NM_001369414	ERCC1	TGAGGTAGTAGGTTGTGTGGTT#CCACAGGCCCTGCTGCCTCT#.(((((((((((.(.(((((..#))))).).))))))))))).	2114	2134	1.0	-29.2	1	2.58192e-05	0.471	0.0	0.0	-5.8179050102739955	17	20	11	3UTR	MIRT052171	0	0
hsa-let-7b-5p	NM_001369415	ERCC1	TGAGGTAGTAGGTTGTGTGGTT#CCACAGGCCCTGCTGCCTCT#.(((((((((((.(.(((((..#))))).).))))))))))).	2011	2031	1.0	-29.2	1	2.58192e-05	0.471	0.0	0.0	-5.8179050102739955	17	20	11	3UTR	MIRT052171	0	0
hsa-let-7b-5p	NM_001369419	ERCC1	TGAGGTAGTAGGTTGTGTGGTT#CCACAGGCCCTGCTGCCTCT#.(((((((((((.(.(((((..#))))).).))))))))))).	1991	2011	1.0	-29.2	1	2.58192e-05	0.471	0.0	0.0	-5.8179050102739955	17	20	11	3UTR	MIRT052171	0	0
hsa-let-7b-5p	XM_017021870	ARPP19	TGAGGTAGTAGGTTGTGTGGTT#GCGATCTTGGCTCACTGCAACCTCTGCCTCC#.(((((((.(((((((((((((#.))).))).)))))))))))))).	3890	3921	1.0	-25.9	1	0.001671981	0.397	0.0	0.0	-4.849714495602881	20	24	14	3UTR	MIRT051971	1	1
hsa-let-7b-5p	XM_017023332	RBFOX1	TGAGGTAGTAGGTTGTGTGGTT#ATCACGCAATCTGCAAACCCAG#((.(((.((((((((((((((.#))))))))))))))..))))).	4948	4970	1.0	-22.5	0	0.003250888	0.647	0.0	0.0	-7.038800455379432	19	22	14	3UTR	MIRT032440	1	1
hsa-let-7b-5p	XM_017028696	RBFOX2	TGAGGTAGTAGGTTGTGTGGTT#GCCACAGAACCTCTCCTCT#.((((.((.(((((.((((((.#)))))).))))))))))).	6287	6306	1.0	-25.2	0	0.2435772	0.441	0.0	0.0	-7.486122817046563	17	19	11	3UTR	MIRT032498	1	1
hsa-let-7b-5p	XM_024450656	ZNF652	TGAGGTAGTAGGTTGTGTGGTT#ATCCTTGAGACAGCCTGCTGTCTTG#.(((((((((((((((.(.(..#.).).))))))))))))))).	8437	8462	1.0	-20.7	1	1.837698e-05	0.529	0.0	0.0	-3.793324837357118	17	21	15	3UTR	MIRT052080	1	1
hsa-let-7b-5p	XM_024450656	ZNF652	TGAGGTAGTAGGTTGTGTGGTT#AGCCACCACGTCCAACTGCCTTAT#(((((((((.((.(((((((((#)))))).))).)).))))))))).	4401	4425	1.0	-24.2	1	0.001453699	0.559	0.0	0.0	-6.469211527196086	20	24	9	3UTR	MIRT052080	1	1
hsa-let-7b-5p	XM_047415907	TBC1D19	TGAGGTAGTAGGTTGTGTGGTT#GGCCCTTGAGTCATGACCTGCTTTTTGCCTCC#.((((((((((((((((.....#.)))))))))))....))))).	3562	3594	1.0	-20.8	1	0.02205791	0.485	0.0	0.0	-3.793324837357118	16	22	11	3UTR	MIRT495971	0	0
hsa-let-7b-5p	XM_047416614	MARCHF6	TGAGGTAGTAGGTTGTGTGGTT#TACATTTCCTACTGCCTGAT#(.((((((((((..(((((...#)))))..)))))))))).).	2932	2952	1.0	-22.5	1	0.1182599	0.676	0.0	0.0	-7.247220858403485	16	20	10	3UTR	MIRT052052	0	0
hsa-let-7b-5p	XM_047416640	SLC12A7	TGAGGTAGTAGGTTGTGTGGTT#CCCACAGCCTCTGCCTG#..((((((.((((((((.((..#)))))))))))))))).	4806	4823	1.0	-24.5	1	7.201129e-05	0.441	0.0	0.0	-6.013390377618052	16	17	16	3UTR	MIRT497878	0	0
hsa-let-7b-5p	XM_047417664	TCOF1	TGAGGTAGTAGGTTGTGTGGTT#CCACCGACCTCTGCCCAC#((.(((((.((((((.((((..#))))))))))))))))).	4240	4258	1.0	-23.0	0	0.1143899	0.426	0.0	0.0	-6.784552659057488	17	18	17	3UTR	MIRT032257	0	0
hsa-let-7b-5p	XM_047417828	ZCCHC9	TGAGGTAGTAGGTTGTGTGGTT#ACTATCATGAGTTACTACCTCAT#(((((((((((.(((((((((.#)))).))))).))))))))))).	1838	1861	1.0	-24.1	1	0.002227966	0.588	0.0	0.0	-7.284377755798021	20	23	11	3UTR	MIRT052011	0	1
hsa-let-7b-5p	XM_047419912	CUX1	TGAGGTAGTAGGTTGTGTGGTT#ACCATCAAAACCTGCTACTTTG#.(((((((((((((.((((((.#)))).)).))))))))))))).	8466	8488	1.0	-23.6	1	0.01552696	0.529	0.0	0.0	-4.528774397607753	19	22	13	3UTR	MIRT052342	0	1
hsa-let-7b-5p	XM_047419916	CUX1	TGAGGTAGTAGGTTGTGTGGTT#ACCATCAAAACCTGCTACTTTG#.(((((((((((((.((((((.#)))).)).))))))))))))).	8160	8182	1.0	-23.6	1	0.01552696	0.529	0.0	0.0	-4.528774397607753	19	22	13	3UTR	MIRT052342	0	1
hsa-let-7b-5p	XM_047420438	CPA4	TGAGGTAGTAGGTTGTGTGGTT#GGCTCACCACAACCTCTGCCTCC#.(((((((.(((((((((((((#))).))).)))))))))))))).	2021	2044	1.0	-26.1	1	0.0491033	0.426	0.0	0.0	-4.849714495602881	20	23	14	3UTR	MIRT682606	1	1
hsa-let-7b-5p	XM_047420438	CPA4	TGAGGTAGTAGGTTGTGTGGTT#TCATCAACCAGCTGCCTCT#.((((((((.(((((.((((..#))))))))).)))))))).	2731	2750	1.0	-22.1	1	0.03763485	0.559	0.0	0.0	-5.2688803859889095	17	19	9	3UTR	MIRT682606	1	1
hsa-let-7b-5p	XM_047423518	HAUS6	TGAGGTAGTAGGTTGTGTGGTT#ACACATACTATTGCCCTCT#.((((((((((..(((((....#)))))..)))))))).)).	3333	3352	1.0	-19.8	1	0.006061481	0.529	0.0	0.0	-8.429258759619717	15	19	8	3UTR	MIRT052232	0	0
hsa-let-7b-5p	XM_047427592	NARS2	TGAGGTAGTAGGTTGTGTGGTT#GCCGATAATTAACTTTTATCCCTTTCTTACAGATGAGGCTGCTACCTCT#.((((((((((.((.(((((..#.))))).)...).)))))))))).	3070	3119	1.0	-20.1	1	1.797512e-05	0.574	0.0	0.0	-7.875577707204108	17	24	10	3UTR	MIRT032305	0	0
hsa-let-7b-5p	XM_047429469	STAT2	TGAGGTAGTAGGTTGTGTGGTT#AGCTCACTGCAGCCTCAACCTCCTGGGTTCAAGCAATCCTCCTACCTCAG#((((((((.(((((((.(((..#.))).)))).))).)))))))).	2558	2608	1.0	-21.6	1	0.01148797	0.412	0.0	0.0	-4.993964104447428	18	23	8	3UTR	MIRT681508	0	0
hsa-let-7b-5p	XM_047431919	NEK9	TGAGGTAGTAGGTTGTGTGGTT#GGCGCGATCTCAGCTCACTGCAACCTCTGCCTCC#.(((((((.(((((((((((((#.))).))).)))))))))))))).	7076	7110	1.0	-26.1	1	0.003613861	0.397	0.0	0.0	-4.849714495602881	20	24	14	3UTR	MIRT052110	1	0
hsa-let-7b-5p	XM_047432112	ARPP19	TGAGGTAGTAGGTTGTGTGGTT#GCGATCTTGGCTCACTGCAACCTCTGCCTCC#.(((((((.(((((((((((((#.))).))).)))))))))))))).	3882	3913	1.0	-25.9	1	0.001671981	0.397	0.0	0.0	-4.849714495602881	20	24	14	3UTR	MIRT051971	1	1
hsa-let-7b-5p	XM_047432115	DYRK3	TGAGGTAGTAGGTTGTGTGGTT#CCACACAATCTCTGATGTCTTCT#.(((((((.(((((((((((..#))))))))))))))....)))).	6664	6687	1.0	-20.3	1	0.01824846	0.632	0.0	0.0	-4.849714495602881	18	23	14	3UTR	MIRT735595	0	0
hsa-let-7b-5p	XM_047434143	ABCC1	TGAGGTAGTAGGTTGTGTGGTT#GACCAAATTCAGCCTACTGCCTCGG#(((((((((((((((..(((((#)))))....))))))))))))))).	4920	4945	1.0	-31.0	1	0.0009046298	0.485	0.0	0.0	-4.1706235265052785	20	25	15	3UTR	MIRT032483	0	0
hsa-let-7b-5p	XM_047434153	ABCC1	TGAGGTAGTAGGTTGTGTGGTT#GACCAAATTCAGCCTACTGCCTCGG#(((((((((((((((..(((((#)))))....))))))))))))))).	4626	4651	1.0	-31.0	1	0.0009046298	0.485	0.0	0.0	-4.1706235265052785	20	25	15	3UTR	MIRT032483	0	0
hsa-let-7b-5p	XM_047434241	RBFOX1	TGAGGTAGTAGGTTGTGTGGTT#ATCACGCAATCTGCAAACCCAG#((.(((.((((((((((((((.#))))))))))))))..))))).	4293	4315	1.0	-22.5	0	0.003250888	0.647	0.0	0.0	-7.038800455379432	19	22	14	3UTR	MIRT032440	1	1
hsa-let-7b-5p	XM_047434248	RBFOX1	TGAGGTAGTAGGTTGTGTGGTT#ATCACGCAATCTGCAAACCCAG#((.(((.((((((((((((((.#))))))))))))))..))))).	3818	3840	1.0	-22.5	0	0.003250888	0.647	0.0	0.0	-7.038800455379432	19	22	14	3UTR	MIRT032440	1	1
hsa-let-7b-5p	XM_047434250	RBFOX1	TGAGGTAGTAGGTTGTGTGGTT#ATCACGCAATCTGCAAACCCAG#((.(((.((((((((((((((.#))))))))))))))..))))).	3871	3893	1.0	-22.5	0	0.003250888	0.647	0.0	0.0	-7.038800455379432	19	22	14	3UTR	MIRT032440	1	1
hsa-let-7b-5p	XM_047434251	RBFOX1	TGAGGTAGTAGGTTGTGTGGTT#ATCACGCAATCTGCAAACCCAG#((.(((.((((((((((((((.#))))))))))))))..))))).	3790	3812	1.0	-22.5	0	0.003250888	0.647	0.0	0.0	-7.038800455379432	19	22	14	3UTR	MIRT032440	1	1
hsa-let-7b-5p	XM_047434584	UBE2I	TGAGGTAGTAGGTTGTGTGGTT#AGCTCACTACAACCTCTGCCTCC#.(((((((.(((((((((((((#))).))).)))))))))))))).	2359	2382	1.0	-26.2	1	0.00188625	0.441	0.0	0.0	-4.849714495602881	20	23	14	3UTR	MIRT032401	0	0
hsa-let-7b-5p	XM_047434584	UBE2I	TGAGGTAGTAGGTTGTGTGGTT#GGCCACATGGCAAGACCTGCTCTCTTTAA#(((((.((((((((((((((((#)))))))).....))))))))..))))).	2827	2856	1.0	-22.1	0	0.09114777	0.603	0.0	0.0	-5.838533207394711	21	29	8	3UTR	MIRT032401	0	0
hsa-let-7b-5p	XM_047436514	SLC25A19	TGAGGTAGTAGGTTGTGTGGTT#ACCTATCAGCCCTGCCTG#..((((((..(((((...(((.#)))...))))))))))).	1138	1156	1.0	-17.6	1	0.0335648	0.441	0.0	0.0	-7.488945926249844	14	18	11	3UTR	MIRT032289	0	0
hsa-let-7b-5p	XM_047438115	HNRNPUL1	TGAGGTAGTAGGTTGTGTGGTT#CCTCCAGCCCACTGCCTCC#.((((((((.(((((.(.((..#)).)))))).)))))))).	2234	2253	1.0	-23.1	1	0.002393612	0.324	0.0	0.0	-5.2688803859889095	16	19	8	3UTR	MIRT052204	0	0
hsa-let-7b-5p	XM_047438178	C19orf47	TGAGGTAGTAGGTTGTGTGGTT#CCTTCTTCCCCTGAGCAGGGTCTGCTGCCTCAG#((((((((((((((.(((....#.))).)))))))))))))).	1639	1672	1.0	-23.3	1	2.343369e-09	0.353	0.0	0.0	-4.6730240064523	17	20	14	3UTR	MIRT559090	1	1
hsa-let-7b-5p	XM_047441253	RBFOX2	TGAGGTAGTAGGTTGTGTGGTT#GCCACAGAACCTCTCCTCT#.((((.((.(((((.((((((.#)))))).))))))))))).	6277	6296	1.0	-25.2	0	0.2435772	0.441	0.0	0.0	-7.486122817046563	17	19	11	3UTR	MIRT032498	1	1
hsa-let-7b-5p	XM_047441496	FOXRED2	TGAGGTAGTAGGTTGTGTGGTT#GGCTCACTGCAACTTCTGCCTCC#.(((((((.(((((((((((((#))).))).)))))))))))))).	4640	4663	1.0	-23.0	1	0.01332338	0.456	0.0	0.0	-4.849714495602881	20	23	14	3UTR	MIRT052050	0	0
hsa-let-7b-5p	XM_047441497	FOXRED2	TGAGGTAGTAGGTTGTGTGGTT#GGCTCACTGCAACTTCTGCCTCC#.(((((((.(((((((((((((#))).))).)))))))))))))).	4370	4393	1.0	-23.0	1	0.01332338	0.456	0.0	0.0	-4.849714495602881	20	23	14	3UTR	MIRT052050	0	0
hsa-let-7b-5p	XM_047441560	EIF3D	TGAGGTAGTAGGTTGTGTGGTT#ACCCCGCAACCTGGCCA#...(((..(((((((((.(((.#))).)))))))))))).	1086	1103	1.0	-19.4	0	0.02535092	0.529	0.0	0.0	-10.371861657730689	15	17	12	3UTR	MIRT052211	0	0
hsa-let-7b-5p	XM_047443512	TOE1	TGAGGTAGTAGGTTGTGTGGTT#GACCACAAAACCCTGCTCTTAT#((((((((..((((.(((((((#))))))).)))))))).)))).	876	898	1.0	-19.9	1	0.0130882	0.544	0.0	0.0	-6.971920133026242	19	22	8	3UTR	MIRT032323	0	0
hsa-let-7b-5p	XM_047443741	ATG4B	TGAGGTAGTAGGTTGTGTGGTT#GCCCCGCTGCTCTGCTGCCTG#..(((((((((((.(((.(((.#))).))).)).))))))))).	2499	2520	1.0	-22.8	1	0.001727503	0.382	0.0	0.0	-5.813840636892696	17	21	9	3UTR	MIRT032363	1	0
hsa-let-7b-5p	XM_047444487	NDUFA10	TGAGGTAGTAGGTTGTGTGGTT#CCCACAGCCTCCTCCCCTCT#.((((.((.((((((((.((..#)))))))))).))..)))).	2267	2287	1.0	-21.1	0	0.2091365	0.426	0.0	0.0	-6.750673256795928	16	20	10	3UTR	MIRT051977	0	0
hsa-let-7b-5p	XM_047448121	MAP4	TGAGGTAGTAGGTTGTGTGGTT#AACAGCACAGGCCCAGAGTACCTGCTGCCTCC#.((((((((((((..((.((((#.))))))....)))))))))))).	8956	8988	1.0	-25.9	1	0.01962207	0.368	0.0	0.0	-5.3856143151281595	18	24	12	3UTR	MIRT052234	0	0
hsa-let-7b-5p	XM_047449174	AK4	TGAGGTAGTAGGTTGTGTGGTT#TATTCCTGCTGCCTTAA#((((((((((((..(((.....#))).)))))))))))).	2025	2042	1.0	-18.7	1	0.1383982	0.618	0.0	0.0	-6.083544976388314	15	17	12	3UTR	MIRT508935	0	0
hsa-let-7b-5p	NM_153273	IP6K1	TGAGGTAGTAGGTTGTGTGGTT#AGCCCTTAATGGCACAGATCTGCTGCTTCT#.(((((((((((((((((.(((#.))).))))).)))))))))))).	3042	3072	1.0	-25.0	1	0.01753986	0.471	0.7969840555555554	1.4383197174999998	-3.793324837357118	20	24	12	3UTR	MIRT051881	0	0
hsa-let-7b-5p	NM_153273	IP6K1	TGAGGTAGTAGGTTGTGTGGTT#GACCACACGCCCTCTCAGCCAGGCTCCTCAG#(((((.((((((.(((((((((#))))))))).))).........)))))))).	1822	1853	1.0	-24.0	0	0.003742036	0.353	0.2977524444444445	0.5879971787500002	-7.127663820060954	20	31	9	3UTR	MIRT051881	0	0
hsa-let-7b-5p	NM_153280	UBA1	TGAGGTAGTAGGTTGTGTGGTT#GCCACTGCCTTCTACCTTG#.(((((((.((((...(((((.#))))).)))).))))))).	3422	3441	1.0	-21.9	1	0.2559023	0.559	0.8959232857142858	0.8499309801612902	-6.675053053677535	16	19	7	3UTR	MIRT051972	0	0
hsa-let-7b-5p	NM_170743	IFNLR1	TGAGGTAGTAGGTTGTGTGGTT#GCACACCTGCTATACCTCAT#((((((((((((.(((((....#)))))))))))..)))))).	2003	2023	1.0	-22.8	1	0.09218872	0.426	0.3498200392857143	0.008660340625000013	-5.226705058867908	17	20	11	3UTR	MIRT475334	0	1
hsa-let-7b-5p	NM_170743	IFNLR1	TGAGGTAGTAGGTTGTGTGGTT#CTGCACAGCCGGGCCAACCTCT#.(((((.((.((((((((((..#))))))))))..))..))))).	3401	3423	1.0	-22.4	0	0.0008805029	0.485	0.012511949999999994	0.08557500499999998	-6.5795178405566155	17	22	10	3UTR	MIRT475334	0	1
hsa-let-7b-5p	NM_172387	NFATC1	TGAGGTAGTAGGTTGTGTGGTT#ACGTACACTCCTGCTGCCTTAC#((((((((((((..(((((((.#)).))))).)))))))))))).	3436	3458	1.0	-24.3	1	0.02008925	0.515	0.0	0.0	-6.083544976388314	19	22	12	3UTR	MIRT052157	0	0
hsa-let-7b-5p	NM_172388	NFATC1	TGAGGTAGTAGGTTGTGTGGTT#ACGTACACTCCTGCTGCCTTAC#((((((((((((..(((((((.#)).))))).)))))))))))).	2271	2293	1.0	-24.3	1	0.02008925	0.515	0.0	0.0	-6.083544976388314	19	22	12	3UTR	MIRT052157	0	0
hsa-let-7b-5p	NM_172389	NFATC1	TGAGGTAGTAGGTTGTGTGGTT#ACGTACACTCCTGCTGCCTTAC#((((((((((((..(((((((.#)).))))).)))))))))))).	3129	3151	1.0	-24.3	1	0.02008925	0.515	0.03582160833333332	0.16617480874999996	-6.083544976388314	19	22	12	3UTR	MIRT052157	0	0
hsa-let-7b-5p	NM_172390	NFATC1	TGAGGTAGTAGGTTGTGTGGTT#AGCCGCTCCTGCTACCTCC#.(((((((((((....((((((#)))))).))))))))))).	4285	4304	1.0	-25.0	1	0.003027036	0.294	1.2430879636363636	1.567452304807692	-6.907794008098015	17	19	11	3UTR	MIRT052157	0	0
hsa-let-7b-5p	NM_173064	IFNLR1	TGAGGTAGTAGGTTGTGTGGTT#GCACACCTGCTATACCTCAT#((((((((((((.(((((....#)))))))))))..)))))).	1916	1936	1.0	-22.8	1	0.09218872	0.426	1.7614073757142859	1.406330566625	-5.226705058867908	17	20	11	3UTR	MIRT475334	0	1
hsa-let-7b-5p	NM_173064	IFNLR1	TGAGGTAGTAGGTTGTGTGGTT#CTGCACAGCCGGGCCAACCTCT#.(((((.((.((((((((((..#))))))))))..))..))))).	3314	3336	1.0	-22.4	0	0.0008805029	0.485	0.02839159999999996	0.06563950350000013	-6.5795178405566155	17	22	10	3UTR	MIRT475334	0	1
hsa-let-7b-5p	NM_173163	NFATC3	TGAGGTAGTAGGTTGTGTGGTT#AGCCCACACCTATGCCTCAG#(((((((.((((.((((.((((#))))))))))))))))))).	4125	4145	1.0	-23.8	1	0.10375	0.574	0.0	0.0	-7.5403399880485384	19	20	19	3UTR	MIRT052288	0	0
hsa-let-7b-5p	NM_173165	NFATC3	TGAGGTAGTAGGTTGTGTGGTT#AGCCCACACCTATGCCTCAG#(((((((.((((.((((.((((#))))))))))))))))))).	4036	4056	1.0	-23.8	1	0.10375	0.574	2.515182857142857	0.9565779712499999	-7.5403399880485384	19	20	19	3UTR	MIRT052288	0	0
hsa-let-7b-5p	NM_174911	LRATD2	TGAGGTAGTAGGTTGTGTGGTT#AGCTGAGGCTCCTGCTACCTCC#.(((((((((((..((.(((((#)))).).)).))))))))))).	2181	2203	1.0	-22.7	1	0.0002203414	0.412	0.0	0.0	-5.9392953675437665	18	22	11	3UTR	MIRT052286	1	0
hsa-let-7b-5p	NM_175736	FMNL3	TGAGGTAGTAGGTTGTGTGGTT#GAGCGCTACAGCCTGCTCTCTTCT#.((((.(((((((((((((.((#)).))).))))))))))..)))).	9619	9643	1.0	-22.8	0	0.0009714009	0.397	0.0	0.0	-5.694283598550164	19	24	10	3UTR	MIRT449956	0	0
hsa-let-7b-5p	NM_175852	TXLNA	TGAGGTAGTAGGTTGTGTGGTT#AGCCAGGCACCTGCTCCTCT#.((((.((((((.(((.(((((#))))).))))))))))))).	4658	4678	1.0	-26.2	0	0.0005708911	0.338	0.0	0.0	-6.983414211216407	18	20	13	3UTR	MIRT052326	1	1
hsa-let-7b-5p	NM_175852	TXLNA	TGAGGTAGTAGGTTGTGTGGTT#CCACATAATTGCCTGACTCACACTTCAGCTACCTCT#.(((((((((((((((((((..#)))))))...)))).............)))))))).	3841	3877	1.0	-23.2	1	0.002510429	0.456	0.4803496657142857	0.4971541724999998	-3.793324837357118	19	36	8	3UTR	MIRT052326	1	1
hsa-let-7b-5p	NM_175907	PTGR3	TGAGGTAGTAGGTTGTGTGGTT#GGCCACCCGACTTGTACCTGGG#(.(((((.(((((((.((((((#)))))).)))))))))))).).	4500	4522	1.0	-21.5	0	0.0002761801	0.529	0.0	0.0	-7.64793433770108	19	22	12	3UTR	MIRT032369	0	0
hsa-let-7b-5p	NM_176818	GATC	TGAGGTAGTAGGTTGTGTGGTT#CCAGGCCCTCTGCCTTC#.(((((((.(((..((.(((..#))).)))))))))))).	3261	3278	1.0	-18.6	1	0.000502288	0.441	3.9392392857142853	1.6075022237500005	-6.9956850257895296	15	17	12	3UTR	MIRT032329	0	0
hsa-let-7b-5p	NM_177422	AGO3	TGAGGTAGTAGGTTGTGTGGTT#CCACAAATCCTGCTACCTGAC#(.((((((((((...(((((..#)))))...)))))))))).).	12623	12644	1.0	-25.5	1	0.002438313	0.529	0.0	0.0	-7.98267041865412	16	21	10	3UTR	MIRT005037	1	1
hsa-let-7b-5p	NM_177559	CSNK2A1	TGAGGTAGTAGGTTGTGTGGTT#TTACTGGGCATAACTTACTGCTTTT#.((((((((((((((((((((.#.)))..))))))))))))))))).	2398	2423	1.0	-22.3	1	0.04331743	0.691	0.0	0.0	-3.793324837357118	20	24	17	3UTR	MIRT052272	1	0
hsa-let-7b-5p	NM_177560	CSNK2A1	TGAGGTAGTAGGTTGTGTGGTT#TTACTGGGCATAACTTACTGCTTTT#.((((((((((((((((((((.#.)))..))))))))))))))))).	2071	2096	1.0	-22.3	1	0.04331743	0.691	0.5876504818181817	0.5729056787499998	-3.793324837357118	20	24	17	3UTR	MIRT052272	1	0
hsa-let-7b-5p	NM_177966	PDE12	TGAGGTAGTAGGTTGTGTGGTT#GCCATCACGGCTTACTGCAACCTCC#.((((((((((((((((((((.#)))).)))))))))))...))))).	6658	6683	1.0	-25.4	1	0.001173057	0.397	0.0	0.0	-3.793324837357118	20	25	11	3UTR	MIRT005039	1	1
hsa-let-7b-5p	NM_178326	ATG4B	TGAGGTAGTAGGTTGTGTGGTT#GCCCCGCTGCTCTGCTGCCTG#..(((((((((((.(((.(((.#))).))).)).))))))))).	2294	2315	1.0	-22.8	1	0.001727503	0.382	0.0	0.0	-5.813840636892696	17	21	9	3UTR	MIRT032363	1	0
hsa-let-7b-5p	NM_178557	NAT8L	TGAGGTAGTAGGTTGTGTGGTT#GCCCGGCGCGGCCTGCTTTCAGACGCTCAA#(((((((((((((((((((((.#)))..)))))))))))).....)).)))).	1156	1186	1.0	-23.4	1	0.002511969	0.368	0.0	0.0	-3.937574446201665	21	30	12	3UTR	MIRT309843	1	1
hsa-let-7b-5p	NM_178819	GPAT4	TGAGGTAGTAGGTTGTGTGGTT#AATCTCAGCTCCACTGCAACCTCTACCTCC#.(((((((.(((((((((((..#.)))).)))))))))))))).	5197	5227	1.0	-27.7	1	0.02850893	0.456	0.0	0.0	-4.849714495602881	18	21	14	3UTR	MIRT735598	1	1
hsa-let-7b-5p	NM_178819	GPAT4	TGAGGTAGTAGGTTGTGTGGTT#GGCCACGCAGCCATCCATCTTCT#.((((.....((((((((((((#))))))))))))......)))).	5931	5954	1.0	-22.1	0	0.03658358	0.412	0.0	0.0	-11.850501189176057	16	23	12	3UTR	MIRT735598	1	1
hsa-let-7b-5p	NM_181425	FXN	TGAGGTAGTAGGTTGTGTGGTT#CCACTCAGCCTCTGCCTGGA#(.((((((.((((((.((((..#)))).)))))))))))).).	6720	6740	1.0	-25.4	1	0.0001006676	0.456	0.0	0.0	-6.390689066766211	17	20	12	3UTR	MIRT454283	0	0
hsa-let-7b-5p	NM_181500	CUX1	TGAGGTAGTAGGTTGTGTGGTT#GCCCGCAGCCTGACCTCT#.(((((..(((((((((.(((.#))))))))))))))))).	2325	2343	1.0	-23.7	0	4.788886e-05	0.324	-0.38740109999999994	-0.26775743874999997	-7.650646301409068	17	18	17	3UTR	MIRT052342	0	1
hsa-let-7b-5p	NM_181552	CUX1	TGAGGTAGTAGGTTGTGTGGTT#ACCATCAAAACCTGCTACTTTG#.(((((((((((((.((((((.#)))).)).))))))))))))).	8489	8511	1.0	-23.6	1	0.01552696	0.529	0.0	0.0	-4.528774397607753	19	22	13	3UTR	MIRT052342	0	1
hsa-let-7b-5p	NM_181838	UBE2D2	TGAGGTAGTAGGTTGTGTGGTT#ACCCACATCCTGCATTTTAA#((((((.(((((.((((.(((.#))))))).))))))))))).	1575	1595	1.0	-18.4	0	0.2917633	0.647	2.7931095	2.0474456500000002	-6.770391593739227	18	20	11	3UTR	MIRT032280	0	0
hsa-let-7b-5p	NM_182796	MAT2B	TGAGGTAGTAGGTTGTGTGGTT#AACTTCTACAGCTTGATGCCTCC#.((((((.(((((((((.((((#))))..))))))))).)))))).	1833	1856	1.0	-19.9	1	0.007550844	0.603	1.0020006555555558	1.206354375	-6.106959766537749	19	23	9	3UTR	MIRT032407	0	0
hsa-let-7b-5p	NM_182910	SYNE2	TGAGGTAGTAGGTTGTGTGGTT#GCTACACCACCTGCCTGATTGCCA#...((((((((((.(((((((.#))))))).)))))).....)))).	1678	1702	1.0	-21.3	0	0.004943718	0.382	-0.22600761800000005	1.1437381523749997	-7.371380111199145	17	24	7	3UTR	MIRT052060	0	0
hsa-let-7b-5p	NM_198434	AURKA	TGAGGTAGTAGGTTGTGTGGTT#GCCATATAACCTGACAGGAACATGCTACTG#...((((((((((((((((((.#))))))))))))...........)))))).	1425	1455	1.0	-20.9	0	0.03439491	0.529	4.180034482758621	3.5815875000000013	-6.514540193678739	18	30	12	3UTR	MIRT005051	0	0
hsa-let-7b-5p	NM_198435	AURKA	TGAGGTAGTAGGTTGTGTGGTT#GCCATATAACCTGACAGGAACATGCTACTG#...((((((((((((((((((.#))))))))))))...........)))))).	1315	1345	1.0	-20.9	0	0.03439491	0.529	3.5564082551724128	3.5352419575000003	-6.514540193678739	18	30	12	3UTR	MIRT005051	0	0
hsa-let-7b-5p	NM_198437	AURKA	TGAGGTAGTAGGTTGTGTGGTT#GCCATATAACCTGACAGGAACATGCTACTG#...((((((((((((((((((.#))))))))))))...........)))))).	1301	1331	1.0	-20.9	0	0.03439491	0.529	3.1921370137931038	3.59524912	-6.514540193678739	18	30	12	3UTR	MIRT005051	0	0
hsa-let-7b-5p	NM_198514	NHLRC2	TGAGGTAGTAGGTTGTGTGGTT#GGCTCACTGCAACCTCTACCTCC#.(((((((.(((((((((((((#))).))).)))))))))))))).	4126	4149	1.0	-25.7	1	0.03490242	0.426	0.0	0.0	-4.849714495602881	20	23	14	3UTR	MIRT701427	1	0
hsa-let-7b-5p	NM_198514	NHLRC2	TGAGGTAGTAGGTTGTGTGGTT#GCCACCACCTACTGTCTCC#.(((((((((((.((.(((((.#)))))))))))))))))).	2418	2437	1.0	-23.1	1	0.2543034	0.529	0.0	0.0	-5.315504530326973	18	19	18	3UTR	MIRT701427	1	0
hsa-let-7b-5p	NM_198900	FMNL3	TGAGGTAGTAGGTTGTGTGGTT#GAGCGCTACAGCCTGCTCTCTTCT#.((((.(((((((((((((.((#)).))).))))))))))..)))).	9466	9490	1.0	-22.8	0	0.0009714009	0.397	0.0	0.0	-5.694283598550164	19	24	10	3UTR	MIRT449956	0	0
hsa-let-7b-5p	NM_198902	TSPAN3	TGAGGTAGTAGGTTGTGTGGTT#ACCTACTTACCTACTACCTG#..(((((((((((.(((.(((.#))))))..))))))))))).	988	1008	1.0	-23.1	1	0.5483958	0.544	0.314309490909091	0.3017599530000001	-5.813840636892696	17	20	11	3UTR	MIRT052340	0	0
hsa-let-7b-5p	NM_198902	TSPAN3	TGAGGTAGTAGGTTGTGTGGTT#GCTATAGAACCACTGCCTG#..(((((((.((((.((((((.#)))))).))))))))))).	5866	5885	1.0	-22.8	1	0.0172295	0.559	0.0	0.0	-6.934956747951103	17	19	11	3UTR	MIRT052340	0	0
hsa-let-7b-5p	NM_198902	TSPAN3	TGAGGTAGTAGGTTGTGTGGTT#CCTCCCTCCTGCTGCCTCC#.(((((((((((..(.(.((..#)).))..))))))))))).	3774	3793	1.0	-22.3	1	0.1844584	0.412	0.0	0.0	-6.1723444478473795	15	19	11	3UTR	MIRT052340	0	0
hsa-let-7b-5p	NM_198902	TSPAN3	TGAGGTAGTAGGTTGTGTGGTT#ACACGAGCCTGCTTCTGTTACCTCC#.(((((((((((((((((....#)))).))))))))......))))).	1128	1153	1.0	-20.4	1	1.867907e-07	0.529	0.5359628758333335	0.8446841327500001	-3.793324837357118	17	25	8	3UTR	MIRT052340	0	0
hsa-let-7b-5p	NM_198963	DHX57	TGAGGTAGTAGGTTGTGTGGTT#ACCTGCTTCTAGCTCACCTGGGAAATAACAGCAGAACCTCTACCTCGA#((((((((.(((((.(((.(((#.))).))).))))))))))))).	4344	4392	1.0	-25.0	1	0.02787065	0.485	0.0	0.0	-5.729413664698063	19	23	13	3UTR	MIRT001639	1	1
hsa-let-7b-5p	NM_198968	DZIP1	TGAGGTAGTAGGTTGTGTGGTT#ACCAGATAACTTGCTGCTTCAA#((((((((((((((((.((((.#)))).)))))))))))))))).	7121	7143	1.0	-28.6	1	0.03177391	0.721	0.0	0.0	-3.937574446201665	20	22	16	3UTR	MIRT005040	1	0
hsa-let-7b-5p	NM_199359	TPD52L2	TGAGGTAGTAGGTTGTGTGGTT#AGCACACGCAACCCAGCCTCAG#((((((....((((((((((((#))).)))))))))..)))))).	683	705	1.0	-23.5	0	0.009436577	0.368	0.1963640307692308	0.8103198206250002	-10.093792036827557	18	22	9	3UTR	MIRT052308	0	0
hsa-let-7b-5p	NM_199360	TPD52L2	TGAGGTAGTAGGTTGTGTGGTT#AGCACACGCAACCCAGCCTCAG#((((((....((((((((((((#))).)))))))))..)))))).	812	834	1.0	-23.5	0	0.009436577	0.368	0.34820556153846144	0.7690231512500001	-10.093792036827557	18	22	9	3UTR	MIRT052308	0	0
hsa-let-7b-5p	NM_199362	TPD52L2	TGAGGTAGTAGGTTGTGTGGTT#AGCACACGCAACCCAGCCTCAG#((((((....((((((((((((#))).)))))))))..)))))).	785	807	1.0	-23.5	0	0.009436577	0.368	0.1760770692307692	0.4158911275	-10.093792036827557	18	22	9	3UTR	MIRT052308	0	0
hsa-let-7b-5p	NM_201269	ZNF644	TGAGGTAGTAGGTTGTGTGGTT#TCAGACAATAAAGTGGTGCATCCATGCTACCTCC#.(((((((((((.(((......#.))).)).))))))))).	4737	4771	1.0	-19.3	1	0.01579386	0.603	1.1052621666666667	0.78650488125	-5.08245545002336	14	18	9	3UTR	MIRT505019	1	1
hsa-let-7b-5p	NM_001369762	ZNF28	TGAGGTAGTAGGTTGTGTGGTT#TCACCCACCTCTACCTCC#.(((((((.((((.(.((((..#))))).))))))))))).	3939	3957	1.0	-20.5	1	0.1587975	0.515	0.0	0.0	-5.9396034934269	16	18	11	3UTR	MIRT486662	0	0
hsa-let-7b-5p	NM_001369846	ZBTB37	TGAGGTAGTAGGTTGTGTGGTT#AGCTCACTGCAGCCTCAACCTCCTGGACTCAAGCAATCCTCCTACCTCAT#((((((((.(((((((.(((((#.))).)).)))).))).)))))))).	10859	10909	1.0	-22.7	1	0.4417101	0.426	0.0	0.0	-4.993964104447428	20	26	8	3UTR	MIRT574366	1	0
hsa-let-7b-5p	NM_001370208	FBXL20	TGAGGTAGTAGGTTGTGTGGTT#GCCATGGCACAATCTCAGTTCACTGCAACCTCTGCCTCC#.(((((((.(((((((((((..#.)))).)))))))))))))).	6827	6866	1.0	-25.3	1	0.0003000648	0.485	0.0	0.0	-4.849714495602881	18	21	14	3UTR	MIRT548268	0	0
hsa-let-7b-5p	NM_001370208	FBXL20	TGAGGTAGTAGGTTGTGTGGTT#CCACGAGACCATGCTCCTCAG#(((((.((((((((.(((((..#))))).)))).))))))))).	9530	9551	1.0	-23.1	0	0.02143654	0.5	0.0	0.0	-6.573982767645346	18	21	9	3UTR	MIRT548268	0	0
hsa-let-7b-5p	NM_001370660	CUL1	TGAGGTAGTAGGTTGTGTGGTT#CCACATGTAACCTGCTATG#....((((((((((((((((..#))))))..)))))))))).	3360	3379	1.0	-20.9	0	0.01437668	0.603	0.0	0.0	-9.546562468637928	16	19	10	3UTR	MIRT032428	0	0
hsa-let-7b-5p	NM_001370661	CUL1	TGAGGTAGTAGGTTGTGTGGTT#CCACATGTAACCTGCTATG#....((((((((((((((((..#))))))..)))))))))).	3034	3053	1.0	-20.9	0	0.01437668	0.603	0.0	0.0	-9.546562468637928	16	19	10	3UTR	MIRT032428	0	0
hsa-let-7b-5p	NM_001370662	CUL1	TGAGGTAGTAGGTTGTGTGGTT#CCACATGTAACCTGCTATG#....((((((((((((((((..#))))))..)))))))))).	2975	2994	1.0	-20.9	0	0.01437668	0.603	0.0	0.0	-9.546562468637928	16	19	10	3UTR	MIRT032428	0	0
hsa-let-7b-5p	NM_001370663	CUL1	TGAGGTAGTAGGTTGTGTGGTT#CCACATGTAACCTGCTATG#....((((((((((((((((..#))))))..)))))))))).	2924	2943	1.0	-20.9	0	0.01437668	0.603	0.0	0.0	-9.546562468637928	16	19	10	3UTR	MIRT032428	0	0
hsa-let-7b-5p	NM_001371473	GALNT11	TGAGGTAGTAGGTTGTGTGGTT#CCGGAGGGCCCTTGTGCTGCCTCT#.(((((((((((((.(.(((..#))).).))))....))))))))).	1275	1299	1.0	-22.9	1	0.009457743	0.441	0.0	0.0	-4.528774397607753	17	24	9	3UTR	MIRT052104	0	0
hsa-let-7b-5p	NM_001371474	GALNT11	TGAGGTAGTAGGTTGTGTGGTT#CCGGAGGGCCCTTGTGCTGCCTCT#.(((((((((((((.(.(((..#))).).))))....))))))))).	1330	1354	1.0	-22.9	1	0.009457743	0.441	0.0	0.0	-4.528774397607753	17	24	9	3UTR	MIRT052104	0	0
hsa-let-7b-5p	NM_001371623	TCOF1	TGAGGTAGTAGGTTGTGTGGTT#CCACCGACCTCTGCCCAC#((.(((((.((((((.((((..#))))))))))))))))).	4585	4603	1.0	-23.0	0	0.1143899	0.426	0.0	0.0	-6.784552659057488	17	18	17	3UTR	MIRT032257	0	0
hsa-let-7b-5p	NM_001375323	UTRN	TGAGGTAGTAGGTTGTGTGGTT#AGCCATGACCACCTTTCTACCTCAG#((((((((.((((.((((((((#)))))).)).))))..)))))))).	4859	4884	1.0	-24.7	1	0.06368065	0.618	0.0	0.0	-5.850804021967834	20	25	8	3UTR	MIRT052224	1	1
hsa-let-7b-5p	NM_001375323	UTRN	TGAGGTAGTAGGTTGTGTGGTT#AGCCATATAACCAACTAGATCC#.((..((((.((((((((((((#)))))))))))).))))..)).	3783	3805	1.0	-21.6	0	0.1305449	0.632	0.0	0.0	-12.186890755456961	18	22	12	3UTR	MIRT052224	1	1
hsa-let-7b-5p	NM_001376	DYNC1H1	TGAGGTAGTAGGTTGTGTGGTT#GATTAGGCCACCTACTGCTTCT#.((((((((((((.((.(((((#))))).)).)))))))))))).	16027	16049	1.0	-24.6	1	0.01506276	0.485	-0.2673891416666667	0.3035737412499998	-4.650164754877524	19	22	12	3UTR	MIRT052059	0	0
hsa-let-7b-5p	NM_001376857	TXLNA	TGAGGTAGTAGGTTGTGTGGTT#AGCCAGGCACCTGCTCCTCT#.((((.((((((.(((.(((((#))))).))))))))))))).	4805	4825	1.0	-26.2	0	0.0005708911	0.338	0.0	0.0	-6.983414211216407	18	20	13	3UTR	MIRT052326	1	1
hsa-let-7b-5p	NM_001376857	TXLNA	TGAGGTAGTAGGTTGTGTGGTT#CCACATAATTGCCTGACTCACACTTCAGCTACCTCT#.(((((((((((((((((((..#)))))))...)))).............)))))))).	3988	4024	1.0	-23.2	1	0.002510429	0.456	0.0	0.0	-3.793324837357118	19	36	8	3UTR	MIRT052326	1	1
hsa-let-7b-5p	NM_001377960	RBM12B	TGAGGTAGTAGGTTGTGTGGTT#TCATGCTTTTGCTGCCTCAC#((((((((((((..((((((..#)))))).)))))))))))).	4609	4629	1.0	-21.1	1	0.01469671	0.618	0.0	0.0	-6.083544976388314	18	20	12	3UTR	MIRT032302	0	0
hsa-let-7b-5p	NM_001377963	RBM12B	TGAGGTAGTAGGTTGTGTGGTT#TCATGCTTTTGCTGCCTCAC#((((((((((((..((((((..#)))))).)))))))))))).	4554	4574	1.0	-21.1	1	0.01469671	0.618	0.0	0.0	-6.083544976388314	18	20	12	3UTR	MIRT032302	0	0
hsa-let-7b-5p	NM_001379403	WDR26	TGAGGTAGTAGGTTGTGTGGTT#GACCCTATCACCTCTGCCTCAC#((((((((.((((.(((.((((#)))).))).)))))))))))).	6036	6058	1.0	-23.2	1	0.03816279	0.574	0.0	0.0	-5.850804021967834	19	22	12	3UTR	MIRT052146	0	0
hsa-let-7b-5p	NM_001379446	SLC11A2	TGAGGTAGTAGGTTGTGTGGTT#TCACTGTAACCTCTACCTCC#.(((((((.((((((.((((..#))))..))))))))))))).	3095	3115	1.0	-21.9	1	0.08246197	0.5	0.0	0.0	-5.082763575906494	17	20	13	3UTR	MIRT461171	0	0
hsa-let-7b-5p	NM_001382578	STIM1	TGAGGTAGTAGGTTGTGTGGTT#GACCACCATGGCCTGCCTGCCCTGCCTCC#.(((((((((((((((((((((#)))))).)))))))))......)))))).	2271	2300	1.0	-25.0	1	0.02959893	0.412	0.9719621499999999	0.7645039825000001	-3.793324837357118	21	29	9	3UTR	MIRT032252	0	0
hsa-let-7b-5p	NM_001382579	STIM1	TGAGGTAGTAGGTTGTGTGGTT#GACCACCATGGCCTGCCTGCCCTGCCTCC#.(((((((((((((((((((((#)))))).)))))))))......)))))).	2392	2421	1.0	-25.0	1	0.02959893	0.412	1.308105642857143	1.0746727200000001	-3.793324837357118	21	29	9	3UTR	MIRT032252	0	0
hsa-let-7b-5p	NM_001385682	MAP4	TGAGGTAGTAGGTTGTGTGGTT#AACAGCACAGGCCCAGAGTACCTGCTGCCTCC#.((((((((((((..((.((((#.))))))....)))))))))))).	8862	8894	1.0	-25.9	1	0.01962207	0.368	0.0	0.0	-5.3856143151281595	18	24	12	3UTR	MIRT052234	0	0
hsa-let-7b-5p	NM_001386206	RNASE10	TGAGGTAGTAGGTTGTGTGGTT#GCCCTCAGCCTATTTCCTCT#.((((.(((((((((.(.(((.#)))).))))))))).)))).	2331	2351	1.0	-22.6	0	2.989798e-05	0.603	0.0	0.0	-5.927332678853777	17	20	9	3UTR	MIRT052197	0	0
hsa-let-7b-5p	NM_001391952	USP54	TGAGGTAGTAGGTTGTGTGGTT#ACTAACACAGCCTTCTGTCCTCAA#((((((((.((((((((((((.#)))).)))))))).))).))))).	6475	6499	1.0	-24.9	1	0.005726265	0.515	0.0	0.0	-4.993964104447428	20	24	8	3UTR	MIRT052169	0	0
hsa-let-7b-5p	NM_001391953	USP54	TGAGGTAGTAGGTTGTGTGGTT#ACTAACACAGCCTTCTGTCCTCAA#((((((((.((((((((((((.#)))).)))))))).))).))))).	6308	6332	1.0	-24.9	1	0.005726265	0.515	0.0	0.0	-4.993964104447428	20	24	8	3UTR	MIRT052169	0	0
hsa-let-7b-5p	NM_001391956	USP54	TGAGGTAGTAGGTTGTGTGGTT#ACTAACACAGCCTTCTGTCCTCAA#((((((((.((((((((((((.#)))).)))))))).))).))))).	6636	6660	1.0	-24.9	1	0.005726265	0.515	0.0	0.0	-4.993964104447428	20	24	8	3UTR	MIRT052169	0	0
hsa-let-7b-5p	NM_001394802	IPCEF1	TGAGGTAGTAGGTTGTGTGGTT#GGCACGATTTTAGCTCACTGCAACCTCTGCCTCC#.(((((((.(((((((((((((#.))).))).)))))))))))))).	5536	5570	1.0	-26.0	1	0.000370333	0.441	0.0	0.0	-4.849714495602881	20	24	14	3UTR	MIRT052329	0	0
hsa-let-7b-5p	NM_001395199	ZBTB37	TGAGGTAGTAGGTTGTGTGGTT#AGCTCACTGCAGCCTCAACCTCCTGGACTCAAGCAATCCTCCTACCTCAT#((((((((.(((((((.(((((#.))).)).)))).))).)))))))).	10811	10861	1.0	-22.7	1	0.4417101	0.426	0.0	0.0	-4.993964104447428	20	26	8	3UTR	MIRT574366	1	0
hsa-let-7b-5p	NM_001395918	ICOSLG	TGAGGTAGTAGGTTGTGTGGTT#CCACTGTCACCACTGCCTCC#.((((((((.(((...((((..#))))....))))))))))).	4832	4852	1.0	-21.5	1	0.5022442	0.397	0.0	0.0	-6.861169863759951	15	20	11	3UTR	MIRT475382	0	0
hsa-let-7b-5p	NM_014280	DNAJC8	TGAGGTAGTAGGTTGTGTGGTT#AACCTTTCCCCTGCTATCTCC#.(((((((((((......((((#)))).....))))))))))).	815	836	1.0	-19.7	1	0.05594244	0.471	2.2548233636363637	2.3608014625000004	-6.907794008098015	15	21	11	3UTR	MIRT052102	0	0
hsa-let-7b-5p	NM_014413	EIF2AK1	TGAGGTAGTAGGTTGTGTGGTT#CCAAACCTTCTGCTGCCTCT#.(((((((((((..((.(((..#))).))..))))))))))).	2448	2468	1.0	-21.5	1	0.08158666	0.603	0.18697081818181827	0.8709938075000001	-5.9392953675437665	16	20	11	3UTR	MIRT052113	0	0
hsa-let-7b-5p	NM_014423	AFF4	TGAGGTAGTAGGTTGTGTGGTT#GCTATACAGCTTACAGTTCTAATGCCTGAT#(.(((((((((((((((((((.#))))))))))))))........))))).).	4955	4985	1.0	-21.6	1	0.05387335	0.662	1.962959851851852	1.8871640650000003	-5.101250328216836	20	30	14	3UTR	MIRT052066	0	0
hsa-let-7b-5p	NM_014455	RNF115	TGAGGTAGTAGGTTGTGTGGTT#ACCAAATTGAATAATTCATGACCTGCATGCTTCAG#(((((((((((((((((((((.#))))............)))))))))).))))))).	5694	5729	1.0	-22.4	1	0.03395054	0.574	0.11379251176470587	0.06939814874999997	-3.937574446201665	21	35	10	3UTR	MIRT051949	0	1
hsa-let-7b-5p	NM_014584	ERO1A	TGAGGTAGTAGGTTGTGTGGTT#ACCACTGTAATTACAACCTACCTCT#.(((((...((((((((((((.#))))).......)))))))))))).	4810	4835	1.0	-20.0	0	0.1896531	0.632	3.9645761052631583	3.6856434475000004	-8.707035959654831	17	25	12	3UTR	MIRT032494	1	1
hsa-let-7b-5p	NM_014766	SCRN1	TGAGGTAGTAGGTTGTGTGGTT#ACCAGTTGGGCCTAATCCTGCCTCAT#((((((((((((((...((((.#))))....))))))...)))))))).	2846	2872	1.0	-22.6	1	0.0004466442	0.5	0.3182369823529412	0.4614058425000001	-4.906073086755913	18	26	8	3UTR	MIRT032457	0	0
hsa-let-7b-5p	NM_014774	EFCAB14	TGAGGTAGTAGGTTGTGTGGTT#TTATACGAACCTAACCTACCTTG#.(((((((((((((((((((..#)))))).))))))..))))))).	5603	5626	1.0	-19.5	1	0.1559447	0.691	0.7574178181818181	0.6009094500000001	-3.793324837357118	19	23	7	3UTR	MIRT051951	0	0
hsa-let-7b-5p	NM_014886	NSA2	TGAGGTAGTAGGTTGTGTGGTT#GACTGAATACACTTTCAACATCAGTCCTTAGCTACCTCAA#((((((((((((((((((....#.))).))).)))..))))))))).	4092	4132	1.0	-20.5	1	0.03622774	0.662	0.23730264545454546	0.16498578375000006	-3.937574446201665	18	24	9	3UTR	MIRT032355	0	0
hsa-let-7b-5p	NM_014897	ZNF652	TGAGGTAGTAGGTTGTGTGGTT#AGCCACCACGTCCAACTGCCTTAT#(((((((((.((.(((((((((#)))))).))).)).))))))))).	4878	4902	1.0	-24.2	1	0.001453699	0.559	0.4650969399999999	0.3673874780000001	-6.469211527196086	20	24	9	3UTR	MIRT052080	1	1
hsa-let-7b-5p	NM_014923	FNDC3A	TGAGGTAGTAGGTTGTGTGGTT#CCATAAGTTTCTGCTGCTTCT#.(((((((((((...(((((..#)))))....))))))))))).	4457	4478	1.0	-20.6	1	0.007471091	0.559	1.720968181818182	1.0489709275	-6.674744927794402	16	21	11	3UTR	MIRT001631	1	1
hsa-let-7b-5p	NM_014934	DZIP1	TGAGGTAGTAGGTTGTGTGGTT#ACCAGATAACTTGCTGCTTCAA#((((((((((((((((.((((.#)))).)))))))))))))))).	7064	7086	1.0	-28.6	1	0.03177391	0.721	0.82890615375	1.1978934273750002	-3.937574446201665	20	22	16	3UTR	MIRT005040	1	0
hsa-let-7b-5p	NM_015014	RBM34	TGAGGTAGTAGGTTGTGTGGTT#GGCGTGATCTTGGCTCACTGCAACCTCTGCCTTC#.(((((((.(((((((((((((#.))).))).)))))))))))))).	1562	1596	1.0	-24.0	1	0.002079385	0.397	0.5632587866666668	0.651649425	-4.849714495602881	20	24	14	3UTR	MIRT032382	0	0
hsa-let-7b-5p	NM_015042	ZNF609	TGAGGTAGTAGGTTGTGTGGTT#CCACTAAGTCCTGCTGCTTCT#.(((((((((((((..((((..#))))..)).))))))))))).	5427	5448	1.0	-24.1	1	0.06753776	0.485	1.4901207642857142	0.7549141187500001	-4.761823477911366	17	21	11	3UTR	MIRT735614	0	0
hsa-let-7b-5p	NM_015140	TTLL12	TGAGGTAGTAGGTTGTGTGGTT#AGCTGCACCTGATGATGCTGCCTCT#.(((((((((.(((((((((((#))))))))..)))..))))))))).	3176	3201	1.0	-22.0	1	0.005418623	0.5	1.3297544692307695	1.9121112416249997	-6.618099312767468	20	25	9	3UTR	MIRT032468	0	0
hsa-let-7b-5p	NM_015180	SYNE2	TGAGGTAGTAGGTTGTGTGGTT#GCTACACCACCTGCCTGATTGCCA#...((((((((((.(((((((.#))))))).)))))).....)))).	20869	20893	1.0	-21.3	0	0.004943718	0.382	-0.22600761800000005	1.1437381523749997	-7.371380111199145	17	24	7	3UTR	MIRT052060	0	0
hsa-let-7b-5p	NM_015324	RRP8	TGAGGTAGTAGGTTGTGTGGTT#AGCCACACAGACTTGCTTTTTATTCCTCAA#(((((.((((((((((((((((#)))))))))).)))))).......))))).	5287	5317	1.0	-24.3	0	0.09876414	0.588	2.7886275058823533	3.9408650037499995	-5.838533207394711	21	30	10	3UTR	MIRT005242	0	0
hsa-let-7b-5p	NM_015324	RRP8	TGAGGTAGTAGGTTGTGTGGTT#AGCCACATGGCCTTCCTGTCCTG#..((((((.(((((((((((((#)))))))))))))..))).))).	1807	1830	1.0	-23.4	1	0.0004455255	0.5	0.9430312	0.28171067375000003	-6.013390377618052	19	23	13	3UTR	MIRT005242	0	0
hsa-let-7b-5p	NM_015328	AHCYL2	TGAGGTAGTAGGTTGTGTGGTT#CCAAAAATCATAACCTGCTGTTTCT#.(((((((((((((((((((..#))).....)))))))))))))))).	3884	3909	1.0	-20.4	1	0.1036086	0.603	0.8588790458333334	0.45238543500000006	-3.793324837357118	19	25	16	3UTR	MIRT482223	0	0
hsa-let-7b-5p	NM_015339	ADNP	TGAGGTAGTAGGTTGTGTGGTT#GGCTATGGCAACGTGCTGCCA#...(((((((.(((((.(((((#)))))..))))).))))))).	6501	6522	1.0	-21.9	0	3.021368e-06	0.559	1.8235814285714285	2.320975	-9.33931466908909	17	21	7	3UTR	MIRT052249	0	0
hsa-let-7b-5p	NM_015425	POLR1A	TGAGGTAGTAGGTTGTGTGGTT#ACCATGTTGCCCAGGCTCAAACTCCTGAGCTCACACGATCTGCTGCCTTC#.(((((((((((((((((((((#.))).)))))))))))))))))).	12328	12378	1.0	-30.5	1	0.1970597	0.471	3.946657163636364	2.5278210374999994	-3.793324837357118	21	24	18	3UTR	MIRT032207	0	0
hsa-let-7b-5p	NM_015568	PPP1R16B	TGAGGTAGTAGGTTGTGTGGTT#GGCCATTCCCTCCTTTTCCGCATGCCTCCTGCCTCC#.(((((((.(((.(((((((..#.)))))))))).))))))).	4282	4318	1.0	-24.1	1	0.0004880176	0.397	-0.10753671428571422	0.17395040500000003	-6.138845108269123	17	20	10	3UTR	MIRT052173	1	1
hsa-let-7b-5p	NM_015679	TRUB2	TGAGGTAGTAGGTTGTGTGGTT#AGCTCACTGCAACCTCTGCCTCC#.(((((((.(((((((((((((#))).))).)))))))))))))).	2406	2429	1.0	-25.8	1	0.002650017	0.426	0.053296800000000005	-0.0643739	-4.849714495602881	20	23	14	3UTR	MIRT032411	0	0
hsa-let-7b-5p	NM_015679	TRUB2	TGAGGTAGTAGGTTGTGTGGTT#ACCGCACCTGGCCGGGACCTCAG#((((((....(((((((((((.#)))))))..))))...)))))).	1901	1924	1.0	-23.0	0	0.0002510931	0.5	0.0006967692307692337	-0.10600177500000002	-10.093792036827557	17	23	7	3UTR	MIRT032411	0	0
hsa-let-7b-5p	NM_015679	TRUB2	TGAGGTAGTAGGTTGTGTGGTT#GATTATGCCAACCTCTGCCTCC#.(((((((.(((((((((((((#)))))))).)))))))))))).	2607	2629	1.0	-22.8	1	0.04456408	0.382	0.032709499999999996	0.033598350000000034	-4.849714495602881	20	22	12	3UTR	MIRT032411	0	0
hsa-let-7b-5p	NM_015966	ERGIC3	TGAGGTAGTAGGTTGTGTGGTT#CCCCAGCCTCTGCCA#...(((((.((((((.(.((..#)))))))))))))).	1223	1238	1.0	-18.4	0	0.02750995	0.309	0.1719580666666667	0.1597552475	-7.803978932228115	14	15	14	3UTR	MIRT032333	0	0
hsa-let-7b-5p	NM_016009	SH3GLB1	TGAGGTAGTAGGTTGTGTGGTT#AGCCTATAGCCAACTTTGCCTCAA#(((((((((.(((((((.((((#))))))))))).)))..)))))).	4631	4655	1.0	-21.9	1	0.0486071	0.603	0.10357778181818182	-0.05819235500000003	-5.180080914529843	20	24	11	3UTR	MIRT032399	0	0
hsa-let-7b-5p	NM_016124	RHD	TGAGGTAGTAGGTTGTGTGGTT#ACCATCTTGGCTCACTGCAACCTCTACCTCC#.(((((((.(((((((((((((#.))).))).)))))))))))))).	1674	1705	1.0	-25.9	1	0.02089599	0.441	0.1323924	-0.039763404999999946	-4.849714495602881	20	24	14	3UTR	MIRT453404	0	0
hsa-let-7b-5p	NM_016352	CPA4	TGAGGTAGTAGGTTGTGTGGTT#TCATCAACCAGCTGCCTCT#.((((((((.(((((.((((..#))))))))).)))))))).	2608	2627	1.0	-22.1	1	0.03763485	0.559	0.027156822499999955	0.21691006925	-5.2688803859889095	17	19	9	3UTR	MIRT682606	1	1
hsa-let-7b-5p	NM_016359	NUSAP1	TGAGGTAGTAGGTTGTGTGGTT#AGCTACATAGCCCTATCG#...(((((..((((((((((((#))))))))))))))))).	2032	2050	1.0	-19.6	0	0.009379432	0.662	0.2455674333333334	0.21871958875000003	-8.81343632025268	17	18	17	3UTR	MIRT052111	0	0
hsa-let-7b-5p	NM_016491	MRPL37	TGAGGTAGTAGGTTGTGTGGTT#GCCCGTTTGGCCTGCTGCTCTCG#.(((((((((((((.((.(((.#)))))...)))))))))).))).	1428	1451	1.0	-21.5	1	9.150395e-05	0.397	-0.4994666942857142	-0.10239689775	-4.528774397607753	18	23	10	3UTR	MIRT052195	0	0
hsa-let-7b-5p	NM_016570	ERGIC2	TGAGGTAGTAGGTTGTGTGGTT#TACACTTCAGACTACCTCT#.((((((((..(..(((((...#)))))..)..)))))))).	3669	3688	1.0	-21.0	1	0.0379553	0.632	0.90088155	1.4667165599999996	-10.006576311282297	14	19	8	3UTR	MIRT032433	1	0
hsa-let-7b-5p	NM_016620	ZNF644	TGAGGTAGTAGGTTGTGTGGTT#TCAGACAATAAAGTGGTGCATCCATGCTACCTCC#.(((((((((((.(((......#.))).)).))))))))).	1258	1292	1.0	-19.3	1	0.01579386	0.603	2.108117001666667	2.3208157487500003	-5.08245545002336	14	18	9	3UTR	MIRT505019	1	1
hsa-let-7b-5p	NM_017548	CDV3	TGAGGTAGTAGGTTGTGTGGTT#GACTACCTCAGATTTGCTGCACTCAT#((((((((((((((..((((((#))))))....)))))))))).)))).	1464	1490	1.0	-20.4	1	0.02550835	0.559	3.4019233333333334	3.6947157125	-4.906073086755913	20	26	10	3UTR	MIRT255311	1	1
hsa-let-7b-5p	NM_017774	CDKAL1	TGAGGTAGTAGGTTGTGTGGTT#GGCACGATCTCAGGTCACTGCAACCTCTGCCTCC#.(((((((.(((((((((((..#.)))).)))))))))))))).	2352	2386	1.0	-25.3	1	0.001071558	0.412	-0.34327066666666656	-0.05226686374999999	-4.849714495602881	18	21	14	3UTR	MIRT001643	0	1
hsa-let-7b-5p	NM_017877	SLC35F6	TGAGGTAGTAGGTTGTGTGGTT#GGCTCACTACAACCTCTGCCTCC#.(((((((.(((((((((((((#))).))).)))))))))))))).	1680	1703	1.0	-26.1	1	0.01634487	0.412	-0.34121809999999997	-0.19355732749999988	-4.849714495602881	20	23	14	3UTR	MIRT005243	0	0
hsa-let-7b-5p	NM_017877	SLC35F6	TGAGGTAGTAGGTTGTGTGGTT#GACCTCATGATCCACCTGCCTCAG#((((((((..(((((((.((((#)))).))))).))..)))))))).	2416	2440	1.0	-23.2	1	0.02243948	0.441	0.264638	0.02432290000000001	-6.236470572775607	19	24	8	3UTR	MIRT005243	0	0
hsa-let-7b-5p	NM_018086	FIGN	TGAGGTAGTAGGTTGTGTGGTT#GGCACACACACATAAAACCTGCTACA#....(((((((((((((((((.#.)).))))))....))))))))).	2631	2657	1.0	-21.9	0	0.05915418	0.574	3.9248290909090913	4.334160012499998	-9.546562468637928	17	24	9	3UTR	MIRT507244	1	1
hsa-let-7b-5p	NM_018101	CDCA8	TGAGGTAGTAGGTTGTGTGGTT#GCCTCCACCACCGCTACCCAG#((.((((((.(((.(((.(((.#)))..))).))))))))))).	1292	1313	1.0	-19.3	0	0.0262187	0.456	-0.3144145	-0.15806323362500002	-7.594460306356698	17	21	11	3UTR	MIRT032429	1	1
hsa-let-7b-5p	NM_018126	TMEM33	TGAGGTAGTAGGTTGTGTGGTT#GCCATCTCAGCTCACTGCAACCTCTGCCTCC#.(((((((.(((((((((((((#.))).))).)))))))))))))).	4675	4706	1.0	-26.1	1	0.01701837	0.426	-0.0030817333333333402	0.04141308749999997	-4.849714495602881	20	24	14	3UTR	MIRT032486	0	0
hsa-let-7b-5p	NM_018126	TMEM33	TGAGGTAGTAGGTTGTGTGGTT#GGCTCACTGCAACCTCTGCCTCC#.(((((((.(((((((((((((#))).))).)))))))))))))).	5378	5401	1.0	-25.7	1	0.0005328116	0.426	-0.11391980000000004	0.0006270375000000071	-4.849714495602881	20	23	14	3UTR	MIRT032486	0	0
hsa-let-7b-5p	NM_018221	MOB1A	TGAGGTAGTAGGTTGTGTGGTT#GGCTCACTGCAAGCTCTGCCTCC#.(((((((.((.((((((((((#))).))).)))).))))))))).	3282	3305	1.0	-21.6	1	0.002239818	0.382	-0.128160725	0.6258321720000001	-8.196517805199235	19	23	9	3UTR	MIRT032205	0	0
hsa-let-7b-5p	NM_001193347	MEF2C	TGAGGTAGTAGGTTGTGTGGTT#AGCCACATATCTTCTACATCAA#(((.((((.(((.(((((((((#))))))))).))))))).))).	5690	5712	1.0	-20.3	0	0.1611524	0.676	7.053884222222223	6.8526400999999995	-9.315116992072863	19	22	9	3UTR	MIRT052262	1	1
hsa-let-7b-5p	NM_001193348	MEF2C	TGAGGTAGTAGGTTGTGTGGTT#AGCCACATATCTTCTACATCAA#(((.((((.(((.(((((((((#))))))))).))))))).))).	5202	5224	1.0	-20.3	0	0.1611524	0.676	4.879772622222223	5.736364200000002	-9.315116992072863	19	22	9	3UTR	MIRT052262	1	1
hsa-let-7b-5p	NM_001193350	MEF2C	TGAGGTAGTAGGTTGTGTGGTT#AGCCACATATCTTCTACATCAA#(((.((((.(((.(((((((((#))))))))).))))))).))).	5600	5622	1.0	-20.3	0	0.1611524	0.676	5.61099588888889	5.828296999999999	-9.315116992072863	19	22	9	3UTR	MIRT052262	1	1
hsa-let-7b-5p	NM_001195104	GSR	TGAGGTAGTAGGTTGTGTGGTT#GCTATTTCAGCTCACCACAACCTCTGCCTCC#.(((((((.(((((((((((((#.))).))).)))))))))))))).	1748	1779	1.0	-26.5	1	0.006878971	0.441	4.779361	3.8737652725	-4.849714495602881	20	24	14	3UTR	MIRT032416	0	0
hsa-let-7b-5p	NM_001195141	TCOF1	TGAGGTAGTAGGTTGTGTGGTT#CCACCGACCTCTGCCCAC#((.(((((.((((((.((((..#))))))))))))))))).	4468	4486	1.0	-23.0	0	0.1143899	0.426	-0.13338399999999997	0.43740331875	-6.784552659057488	17	18	17	3UTR	MIRT032257	0	0
hsa-let-7b-5p	NM_001198777	CUL2	TGAGGTAGTAGGTTGTGTGGTT#ACCACACCCCTCCTCCCTCAA#(((((.((.(((..(((((((.#))))))).))).)).))))).	3643	3664	1.0	-22.6	0	0.9903817	0.603	5.537348000000001	6.07425575875	-9.040893395827124	17	21	7	3UTR	MIRT052315	0	0
hsa-let-7b-5p	NM_001198778	CUL2	TGAGGTAGTAGGTTGTGTGGTT#ACCACACCCCTCCTCCCTCAA#(((((.((.(((..(((((((.#))))))).))).)).))))).	3550	3571	1.0	-22.6	0	0.9903817	0.603	4.299762857142857	5.3875400475	-9.040893395827124	17	21	7	3UTR	MIRT052315	0	0
hsa-let-7b-5p	NM_001198779	CUL2	TGAGGTAGTAGGTTGTGTGGTT#ACCACACCCCTCCTCCCTCAA#(((((.((.(((..(((((((.#))))))).))).)).))))).	3710	3731	1.0	-22.6	0	0.9903817	0.603	4.6128604285714285	5.838638541249999	-9.040893395827124	17	21	7	3UTR	MIRT052315	0	0
hsa-let-7b-5p	NM_001198909	ATP6V1F	TGAGGTAGTAGGTTGTGTGGTT#GCCATCAGCCTTCTTTACTTTTTGAGCCTCT#.(((((((.((((((.(((((.#))))))))))).))...........))))).	548	579	1.0	-19.5	1	0.04972187	0.5	0.3200155283333333	-0.031018923999999976	-5.082763575906494	18	31	11	3UTR	MIRT001650	0	0
hsa-let-7b-5p	NM_001199917	PGM3	TGAGGTAGTAGGTTGTGTGGTT#GCCATATTCACCTGACCTCT#.(((((..(((((.(((((((.#)))))))..)))))))))).	5363	5383	1.0	-20.2	0	0.414784	0.574	2.315309057142857	3.2246240550000005	-8.507486218929476	17	20	10	3UTR	MIRT032419	0	0
hsa-let-7b-5p	NM_001199917	PGM3	TGAGGTAGTAGGTTGTGTGGTT#ACAATGCAGCCTACTGGATTGTCTCT#.(((((((((((((((((.((.#)).))))))))))))).....)))).	1945	1971	1.0	-19.5	1	0.0004473195	0.676	0.3039699940909092	0.22657534687500003	-3.793324837357118	19	26	13	3UTR	MIRT032419	0	0
hsa-let-7b-5p	NM_001202514	MXD1	TGAGGTAGTAGGTTGTGTGGTT#GACCTCGCTGTGTTCTGCTATCTCGA#((((((((((((..(((.((((#)))).))).....)))))))))))).	1575	1601	1.0	-22.4	1	0.001044651	0.5	0.44873695	0.49065712374999987	-6.083544976388314	19	26	12	3UTR	MIRT303317	1	1
hsa-let-7b-5p	NM_001202514	MXD1	TGAGGTAGTAGGTTGTGTGGTT#ACCACAGCCTGAAGCTCCCCCAGCGCCTGCACCTCG#.(((((.((((((..((.((..#.))))..))))))))))).	2430	2466	1.0	-22.0	0	0.000436871	0.412	2.088895	0.5787204799999998	-6.9293008499994775	15	19	11	3UTR	MIRT303317	1	1
hsa-let-7b-5p	NM_001202514	MXD1	TGAGGTAGTAGGTTGTGTGGTT#CCACCAGCCTGACTGCTA#...((((((((((((.((((..#))))))))))).))))).	3513	3531	1.0	-22.1	0	0.001056335	0.574	0.22798392307692314	1.4115353487499998	-6.747589273982352	16	18	11	3UTR	MIRT303317	1	1
hsa-let-7b-5p	NM_001202543	CUX1	TGAGGTAGTAGGTTGTGTGGTT#ACCATCAAAACCTGCTACTTTG#.(((((((((((((.((((((.#)))).)).))))))))))))).	8532	8554	1.0	-23.6	1	0.01552696	0.529	-0.34847856923076925	0.10179917849999998	-4.528774397607753	19	22	13	3UTR	MIRT052342	0	1
hsa-let-7b-5p	NM_001202544	CUX1	TGAGGTAGTAGGTTGTGTGGTT#GCCCGCAGCCTGACCTCT#.(((((..(((((((((.(((.#))))))))))))))))).	2283	2301	1.0	-23.7	0	4.788886e-05	0.324	0.44858949000000004	-0.24182454937500003	-7.650646301409068	17	18	17	3UTR	MIRT052342	0	1
hsa-let-7b-5p	NM_001202545	CUX1	TGAGGTAGTAGGTTGTGTGGTT#GCCCGCAGCCTGACCTCT#.(((((..(((((((((.(((.#))))))))))))))))).	2193	2211	1.0	-23.7	0	4.788886e-05	0.324	0.44858949000000004	-0.24182454937500003	-7.650646301409068	17	18	17	3UTR	MIRT052342	0	1
hsa-let-7b-5p	NM_001202546	CUX1	TGAGGTAGTAGGTTGTGTGGTT#GCCCGCAGCCTGACCTCT#.(((((..(((((((((.(((.#))))))))))))))))).	2214	2232	1.0	-23.7	0	4.788886e-05	0.324	0.44858949000000004	-0.24182454937500003	-7.650646301409068	17	18	17	3UTR	MIRT052342	0	1
hsa-let-7b-5p	NM_001204171	MDM4	TGAGGTAGTAGGTTGTGTGGTT#GCTCACCGCAACCTCTGCCTCC#.(((((((.((((((((((((.#)).))).)))))))))))))).	4172	4194	1.0	-25.3	1	0.002025972	0.397	0.18341792857142858	-0.1495487625	-4.849714495602881	19	22	14	3UTR	MIRT052186	1	1
hsa-let-7b-5p	NM_001204172	MDM4	TGAGGTAGTAGGTTGTGTGGTT#GCTCACCGCAACCTCTGCCTCC#.(((((((.((((((((((((.#)).))).)))))))))))))).	3344	3366	1.0	-25.3	1	0.002025972	0.397	0.18341792857142858	-0.1495487625	-4.849714495602881	19	22	14	3UTR	MIRT052186	1	1
hsa-let-7b-5p	NM_001204172	MDM4	TGAGGTAGTAGGTTGTGTGGTT#CCACACACCTCGGCCTCC#.(((((.(.(((.(((((((..#))))))))))).))))).	3514	3532	1.0	-22.8	0	0.07012686	0.441	-0.1518081428571429	-0.178551575	-7.682531643140443	16	18	11	3UTR	MIRT052186	1	1
hsa-let-7b-5p	NM_001204817	ZNF587	TGAGGTAGTAGGTTGTGTGGTT#GGCTCACTGCAACCTCTGCCTCC#.(((((((.(((((((((((((#))).))).)))))))))))))).	2691	2714	1.0	-25.7	1	0.01256908	0.471	0.19126935999999997	0.007911104625000012	-4.849714495602881	20	23	14	3UTR	MIRT457680	0	1
hsa-let-7b-5p	NM_001206651	SH3GLB1	TGAGGTAGTAGGTTGTGTGGTT#AGCCTATAGCCAACTTTGCCTCAA#(((((((((.(((((((.((((#))))))))))).)))..)))))).	4718	4742	1.0	-21.9	1	0.0486071	0.603	0.25717007272727266	-0.09964814749999998	-5.180080914529843	20	24	11	3UTR	MIRT032399	0	0
hsa-let-7b-5p	NM_001206652	SH3GLB1	TGAGGTAGTAGGTTGTGTGGTT#AGCCTATAGCCAACTTTGCCTCAA#(((((((((.(((((((.((((#))))))))))).)))..)))))).	4694	4718	1.0	-21.9	1	0.0486071	0.603	0.10357778181818182	-0.05819235500000003	-5.180080914529843	20	24	11	3UTR	MIRT032399	0	0
hsa-let-7b-5p	NM_001206653	SH3GLB1	TGAGGTAGTAGGTTGTGTGGTT#AGCCTATAGCCAACTTTGCCTCAA#(((((((((.(((((((.((((#))))))))))).)))..)))))).	4489	4513	1.0	-21.9	1	0.0486071	0.603	0.25717007272727266	-0.09964814749999998	-5.180080914529843	20	24	11	3UTR	MIRT032399	0	0
hsa-let-7b-5p	NM_001207067	BZW1	TGAGGTAGTAGGTTGTGTGGTT#GCCAGTGCCAGCCTATGGCCTCAA#((((((.((((((((..((((.#))))....)))))))).)))))).	3470	3494	1.0	-24.6	0	0.000104746	0.647	0.329095025	0.7697874899999999	-5.7143100613765965	18	24	8	3UTR	MIRT300034	1	1
hsa-let-7b-5p	NM_001207068	BZW1	TGAGGTAGTAGGTTGTGTGGTT#GCCAGTGCCAGCCTATGGCCTCAA#((((((.((((((((..((((.#))))....)))))))).)))))).	3497	3521	1.0	-24.6	0	0.000104746	0.647	0.329095025	0.7697874899999999	-5.7143100613765965	18	24	8	3UTR	MIRT300034	1	1
hsa-let-7b-5p	NM_001207069	BZW1	TGAGGTAGTAGGTTGTGTGGTT#AGCTCACTGCAATCTCTGCCTCC#.(((((((.(((((((((((((#))).))).)))))))))))))).	4350	4373	1.0	-23.2	1	0.02175361	0.471	0.0	0.0	-4.849714495602881	20	23	14	3UTR	MIRT300034	1	1
hsa-let-7b-5p	NM_001218	CA12	TGAGGTAGTAGGTTGTGTGGTT#AGCCACTTCTGCAGGATCCCTACTGCCA#...(((((((((((((((((((#))))))....))))....))))))))).	2227	2255	1.0	-22.4	0	0.0009114882	0.574	0.30364051851851853	0.3957962725000002	-6.514540193678739	19	28	9	3UTR	MIRT032380	0	0
hsa-let-7b-5p	NM_001241	CCNT2	TGAGGTAGTAGGTTGTGTGGTT#GCACAGCCAGTTTTTACCTCT#.(((((((..((((((((....#)))))))).....))))))).	6266	6287	1.0	-20.5	1	0.003108924	0.588	0.47204053125	-0.038631471250000035	-6.09222096393106	15	21	8	3UTR	MIRT548970	1	1
hsa-let-7b-5p	NM_001242618	NXT2	TGAGGTAGTAGGTTGTGTGGTT#ACTGTGAACCCAGCCTATTGCA#....(((((((((((...((((#.))))))))))))))).	748	770	1.0	-17.8	0	0.2001041	0.721	1.1221070999999998	0.37538551375000007	-9.779611548941542	15	17	15	3UTR	MIRT005043	1	0
hsa-let-7b-5p	NM_001242673	AHCYL1	TGAGGTAGTAGGTTGTGTGGTT#GCCATGCACCCTGCTTCCCAG#((.((.((((((.((((((((.#)))))))).)))))).)))).	3577	3598	1.0	-22.9	0	0.001716918	0.5	0.7704331249999999	0.8915476775	-8.685203294367403	18	21	8	3UTR	MIRT052133	0	0
hsa-let-7b-5p	NM_001242675	AHCYL1	TGAGGTAGTAGGTTGTGTGGTT#GCCATGCACCCTGCTTCCCAG#((.((.((((((.((((((((.#)))))))).)))))).)))).	3302	3323	1.0	-22.9	0	0.001716918	0.5	0.7704331249999999	0.8915476775	-8.685203294367403	18	21	8	3UTR	MIRT052133	0	0
hsa-let-7b-5p	NM_001242829	IP6K1	TGAGGTAGTAGGTTGTGTGGTT#GACCACACGCCCTCTCAGCCAGGCTCCTCAG#(((((.((((((.(((((((((#))))))))).))).........)))))))).	2210	2241	1.0	-24.0	0	0.003742036	0.353	0.5297441	0.66475891875	-7.127663820060954	20	31	9	3UTR	MIRT051881	0	0
hsa-let-7b-5p	NM_001243076	E2F3	TGAGGTAGTAGGTTGTGTGGTT#GGCCACCTGGCCTGCTGGGAAACAGCAATCTTCCTTAA#(((((((((((((((.((((((#)))))).))))))))))...............))))).	1571	1609	1.0	-21.6	1	0.03692222	0.456	2.7469300333333333	2.53939200625	-4.1706235265052785	21	38	10	3UTR	MIRT051918	0	0
hsa-let-7b-5p	NM_001243142	NUSAP1	TGAGGTAGTAGGTTGTGTGGTT#AGCTACATAGCCCTATCG#...(((((..((((((((((((#))))))))))))))))).	2026	2044	1.0	-19.6	0	0.009379432	0.662	0.2455674333333334	0.21871958875000003	-8.81343632025268	17	18	17	3UTR	MIRT052111	0	0
hsa-let-7b-5p	NM_001243143	NUSAP1	TGAGGTAGTAGGTTGTGTGGTT#AGCTACATAGCCCTATCG#...(((((..((((((((((((#))))))))))))))))).	1987	2005	1.0	-19.6	0	0.009379432	0.662	0.2455674333333334	0.21871958875000003	-8.81343632025268	17	18	17	3UTR	MIRT052111	0	0
hsa-let-7b-5p	NM_001243144	NUSAP1	TGAGGTAGTAGGTTGTGTGGTT#AGCTACATAGCCCTATCG#...(((((..((((((((((((#))))))))))))))))).	1843	1861	1.0	-19.6	0	0.009379432	0.662	0.2455674333333334	0.21871958875000003	-8.81343632025268	17	18	17	3UTR	MIRT052111	0	0
hsa-let-7b-5p	NM_001243385	PARVB	TGAGGTAGTAGGTTGTGTGGTT#AGCTCACTGCAACCTCTGCCTCC#.(((((((.(((((((((((((#))).))).)))))))))))))).	2136	2159	1.0	-25.8	1	0.0007148441	0.412	0.0	0.0	-4.849714495602881	20	23	14	3UTR	MIRT032339	0	0
hsa-let-7b-5p	NM_001243386	PARVB	TGAGGTAGTAGGTTGTGTGGTT#AGCTCACTGCAACCTCTGCCTCC#.(((((((.(((((((((((((#))).))).)))))))))))))).	2083	2106	1.0	-25.8	1	0.0007148441	0.412	0.0	0.0	-4.849714495602881	20	23	14	3UTR	MIRT032339	0	0
hsa-let-7b-5p	NM_001243770	SLF2	TGAGGTAGTAGGTTGTGTGGTT#GACCACCAGCCTGGACAGCTACGGAGAACCCGCCTTAG#((((((..(((((((.((((((#)))))))))))))..................)))))).	501	539	1.0	-21.4	0	0.005690224	0.515	0.12992907142857144	0.67898218375	-8.027944990557229	19	38	13	3UTR	MIRT051982	1	1
hsa-let-7b-5p	NM_001243892	TPD52L2	TGAGGTAGTAGGTTGTGTGGTT#AGCACACGCAACCCAGCCTCAG#((((((....((((((((((((#))).)))))))))..)))))).	614	636	1.0	-23.5	0	0.009436577	0.368	0.5848816846153846	0.7270672599999998	-10.093792036827557	18	22	9	3UTR	MIRT052308	0	0
hsa-let-7b-5p	NM_001243894	TPD52L2	TGAGGTAGTAGGTTGTGTGGTT#GACCCTCAGCAGCTGCCTGAT#(.(((((((..((((.(.((((#))))).)))).))))))).).	1072	1093	1.0	-19.4	1	0.0005631577	0.485	0.8645895714285715	0.4205528325	-9.40158035225898	17	21	7	3UTR	MIRT052308	0	0
hsa-let-7b-5p	NM_001243895	TPD52L2	TGAGGTAGTAGGTTGTGTGGTT#GACCCTCAGCAGCTGCCTGAT#(.(((((((..((((.(.((((#))))).)))).))))))).).	1185	1206	1.0	-19.4	1	0.0005631577	0.485	0.8645895714285715	0.4205528325	-9.40158035225898	17	21	7	3UTR	MIRT052308	0	0
hsa-let-7b-5p	NM_001256099	CTHRC1	TGAGGTAGTAGGTTGTGTGGTT#ATTTGCTACCTCT#.((((((((((((.........#)))))))))))).	749	762	1.0	-16.1	1	0.3370259	0.706	0.8224291983333334	2.4433783219999996	-5.618663395431772	12	13	12	3UTR	MIRT437975	0	1
hsa-let-7b-5p	NM_001256185	SNX12	TGAGGTAGTAGGTTGTGTGGTT#AACCACACAGTCTCTGACTTCT#.(((((((.(((((((((((((#)))))))))))))))).)))).	1639	1661	1.0	-22.1	1	0.03042484	0.515	1.7631484615384614	1.9127801624999998	-4.849714495602881	20	22	16	3UTR	MIRT052243	0	0
hsa-let-7b-5p	NM_001256188	SNX12	TGAGGTAGTAGGTTGTGTGGTT#AACCACACAGTCTCTGACTTCT#.(((((((.(((((((((((((#)))))))))))))))).)))).	1489	1511	1.0	-22.1	1	0.03042484	0.515	1.5158265384615381	0.7651107074999998	-4.849714495602881	20	22	16	3UTR	MIRT052243	0	0
hsa-let-7b-5p	NM_001256440	C19orf47	TGAGGTAGTAGGTTGTGTGGTT#CCTTCTTCCCCTGAGCAGGGTCTGCTGCCTCAG#((((((((((((((.(((....#.))).)))))))))))))).	1599	1632	1.0	-23.3	1	2.343369e-09	0.353	3.0453550714285713	3.74314477375	-4.6730240064523	17	20	14	3UTR	MIRT559090	1	1
hsa-let-7b-5p	NM_001256441	C19orf47	TGAGGTAGTAGGTTGTGTGGTT#CCTTCTTCCCCTGAGCAGGGTCTGCTGCCTCAG#((((((((((((((.(((....#.))).)))))))))))))).	1582	1615	1.0	-23.3	1	2.343369e-09	0.353	0.37304242857142855	0.3269184312499999	-4.6730240064523	17	20	14	3UTR	MIRT559090	1	1
hsa-let-7b-5p	NM_001256681	PRORP	TGAGGTAGTAGGTTGTGTGGTT#CCGCACAGCCTGAAATGAGGCATCTCTATCTA#..((((((((((((((((((..#)))))))))))).............)))))).	4826	4858	1.0	-22.9	1	0.008559577	0.441	0.0	0.0	-4.95700071937229	18	32	12	3UTR	MIRT549802	1	0
hsa-let-7b-5p	NM_001256875	CDCA8	TGAGGTAGTAGGTTGTGTGGTT#GCCTCCACCACCGCTACCCAG#((.((((((.(((.(((.(((.#)))..))).))))))))))).	1389	1410	1.0	-19.3	0	0.0262187	0.456	-0.3144145	-0.15806323362500002	-7.594460306356698	17	21	11	3UTR	MIRT032429	1	1
hsa-let-7b-5p	NM_001261400	PSMD9	TGAGGTAGTAGGTTGTGTGGTT#TCACATTCTCCTAAAATGACAGCAGCAGAGAGCCTTCTGCCTCAG#((((((((.(((((.(.((.(.#.).)).).))))).)))))))).	2061	2106	1.0	-24.0	1	7.49533e-07	0.426	-0.78941925	-0.08030184249999998	-5.729413664698063	17	23	8	3UTR	MIRT032262	0	0
hsa-let-7b-5p	NM_001267803	PAAF1	TGAGGTAGTAGGTTGTGTGGTT#TACAGCTTCTGCCTTAA#((((((((.((((((((.....#)))))))))))))))).	3025	3042	1.0	-19.3	1	0.0001684179	0.471	0.0	0.0	-4.993964104447428	16	17	16	3UTR	MIRT032270	0	0
hsa-let-7b-5p	NM_001267805	PAAF1	TGAGGTAGTAGGTTGTGTGGTT#TACAGCTTCTGCCTTAA#((((((((.((((((((.....#)))))))))))))))).	3012	3029	1.0	-19.3	1	0.0001684179	0.471	-0.121315375	0.11173548750000004	-4.993964104447428	16	17	16	3UTR	MIRT032270	0	0
hsa-let-7b-5p	NM_001267806	PAAF1	TGAGGTAGTAGGTTGTGTGGTT#TACAGCTTCTGCCTTAA#((((((((.((((((((.....#)))))))))))))))).	2929	2946	1.0	-19.3	1	0.0001684179	0.471	0.0	0.0	-4.993964104447428	16	17	16	3UTR	MIRT032270	0	0
hsa-let-7b-5p	NM_001270660	MARCHF6	TGAGGTAGTAGGTTGTGTGGTT#TACATTTCCTACTGCCTGAT#(.((((((((((..(((((...#)))))..)))))))))).).	3390	3410	1.0	-22.5	1	0.1182599	0.676	3.3603229999999997	2.398140446375	-7.247220858403485	16	20	10	3UTR	MIRT052052	0	0
hsa-let-7b-5p	NM_001270660	MARCHF6	TGAGGTAGTAGGTTGTGTGGTT#AATCGCTGTTTCTCCTGAGCTTGCTGCCTCT#.(((((((((((((..((((((#))))))...........))))))))))))).	8719	8750	1.0	-22.1	1	0.0009646992	0.515	0.23669575384615388	-0.06680241875000001	-4.761823477911366	19	31	13	3UTR	MIRT052052	0	0
hsa-let-7b-5p	NM_001270661	MARCHF6	TGAGGTAGTAGGTTGTGTGGTT#TACATTTCCTACTGCCTGAT#(.((((((((((..(((((...#)))))..)))))))))).).	3219	3239	1.0	-22.5	1	0.1182599	0.676	3.3603229999999997	2.398140446375	-7.247220858403485	16	20	10	3UTR	MIRT052052	0	0
hsa-let-7b-5p	NM_001270661	MARCHF6	TGAGGTAGTAGGTTGTGTGGTT#AATCGCTGTTTCTCCTGAGCTTGCTGCCTCT#.(((((((((((((..((((((#))))))...........))))))))))))).	8548	8579	1.0	-22.1	1	0.0009646992	0.515	0.23669575384615388	-0.06680241875000001	-4.761823477911366	19	31	13	3UTR	MIRT052052	0	0
hsa-let-7b-5p	NM_001271665	NSA2	TGAGGTAGTAGGTTGTGTGGTT#GACTGAATACACTTTCAACATCAGTCCTTAGCTACCTCAA#((((((((((((((((((....#.))).))).)))..))))))))).	3899	3939	1.0	-20.5	1	0.03622774	0.662	0.23730264545454546	0.16498578375000006	-3.937574446201665	18	24	9	3UTR	MIRT032355	0	0
hsa-let-7b-5p	NM_001271869	SZRD1	TGAGGTAGTAGGTTGTGTGGTT#CCATACCCCTCAGGGTGGTTCCCTACCAGCCAGGCTTACTACTTCT#.((((((((((((((..((((.#.))))..))).))))))))))).	1342	1388	1.0	-22.9	1	0.0006306223	0.456	1.4755167333333334	1.0443654962500002	-4.026373917660731	18	23	11	3UTR	MIRT051894	0	0
hsa-let-7b-5p	NM_001277783	ATG12	TGAGGTAGTAGGTTGTGTGGTT#GGCTCATTGCAACCTCTACCTCC#.(((((((.(((((((((((((#))).))).)))))))))))))).	2037	2060	1.0	-23.2	1	0.001828149	0.471	0.18128251533333337	0.3677430693750001	-4.849714495602881	20	23	14	3UTR	MIRT481391	0	0
hsa-let-7b-5p	NM_001277961	STIM1	TGAGGTAGTAGGTTGTGTGGTT#GACCACCATGGCCTGCCTGCCCTGCCTCC#.(((((((((((((((((((((#)))))).)))))))))......)))))).	3126	3155	1.0	-25.0	1	0.02959893	0.412	1.1587082428571427	1.1138892300000003	-3.793324837357118	21	29	9	3UTR	MIRT032252	0	0
hsa-let-7b-5p	NM_001278277	E2F6	TGAGGTAGTAGGTTGTGTGGTT#CCACATTTTCACATACCTAGCTGTTTCTACCTCAT#((((((((((((.(((((((..#.))))))))))).......)))))))).	2322	2357	1.0	-21.9	1	0.04248407	0.544	3.893387789473684	2.65026014625	-5.226705058867908	19	28	11	3UTR	MIRT005044	1	1
hsa-let-7b-5p	NM_001278290	ZNF3	TGAGGTAGTAGGTTGTGTGGTT#AGCCACACACCCATTTTCCTCAC#(((((.(((.((.(((((((((#))))))))))).)))..))))).	1509	1532	1.0	-22.7	0	0.05465086	0.5	2.953853333333333	1.0845755812499998	-8.370170288389133	19	23	11	3UTR	MIRT052240	0	0
hsa-let-7b-5p	NM_001278291	ZNF3	TGAGGTAGTAGGTTGTGTGGTT#AGCCACACACCCATTTTCCTCAC#(((((.(((.((.(((((((((#))))))))))).)))..))))).	1378	1401	1.0	-22.7	0	0.05465086	0.5	0.0	0.0	-8.370170288389133	19	23	11	3UTR	MIRT052240	0	0
hsa-let-7b-5p	NM_001278438	FNDC3A	TGAGGTAGTAGGTTGTGTGGTT#CCATAAGTTTCTGCTGCTTCT#.(((((((((((...(((((..#)))))....))))))))))).	4837	4858	1.0	-20.6	1	0.007471091	0.559	-0.42880487272727275	0.42694802500000006	-6.674744927794402	16	21	11	3UTR	MIRT001631	1	1
hsa-let-7b-5p	NM_001278516	MDM4	TGAGGTAGTAGGTTGTGTGGTT#GCTCACCGCAACCTCTGCCTCC#.(((((((.((((((((((((.#)).))).)))))))))))))).	4254	4276	1.0	-25.3	1	0.002025972	0.397	0.18341792857142858	-0.1495487625	-4.849714495602881	19	22	14	3UTR	MIRT052186	1	1
hsa-let-7b-5p	NM_001278517	MDM4	TGAGGTAGTAGGTTGTGTGGTT#GCTCACCGCAACCTCTGCCTCC#.(((((((.((((((((((((.#)).))).)))))))))))))).	4028	4050	1.0	-25.3	1	0.002025972	0.397	0.18341792857142858	-0.1495487625	-4.849714495602881	19	22	14	3UTR	MIRT052186	1	1
hsa-let-7b-5p	NM_001278518	MDM4	TGAGGTAGTAGGTTGTGTGGTT#GGCTCACTGCAACCTCTGCCTCC#.(((((((.(((((((((((((#))).))).)))))))))))))).	4395	4418	1.0	-25.7	1	0.002907259	0.412	0.0	0.0	-4.849714495602881	20	23	14	3UTR	MIRT052186	1	1
hsa-let-7b-5p	NM_001278518	MDM4	TGAGGTAGTAGGTTGTGTGGTT#GCTCACCGCAACCTCTGCCTCC#.(((((((.((((((((((((.#)).))).)))))))))))))).	3843	3865	1.0	-25.3	1	0.002025972	0.397	0.0	0.0	-4.849714495602881	19	22	14	3UTR	MIRT052186	1	1
hsa-let-7b-5p	NM_001278518	MDM4	TGAGGTAGTAGGTTGTGTGGTT#AGCCTCAAGCAACCCTCCTGCCTCAG#((((((((..((((((..((((#))))....))))))...)))))))).	2724	2750	1.0	-23.7	1	0.02563289	0.456	0.0	0.0	-6.236470572775607	18	26	8	3UTR	MIRT052186	1	1
hsa-let-7b-5p	NM_001278519	MDM4	TGAGGTAGTAGGTTGTGTGGTT#GCTCACCGCAACCTCTGCCTCC#.(((((((.((((((((((((.#)).))).)))))))))))))).	3653	3675	1.0	-25.3	1	0.002025972	0.397	0.18341792857142858	-0.1495487625	-4.849714495602881	19	22	14	3UTR	MIRT052186	1	1
hsa-let-7b-5p	NM_001278519	MDM4	TGAGGTAGTAGGTTGTGTGGTT#CCACACACCTCGGCCTCC#.(((((.(.(((.(((((((..#))))))))))).))))).	3823	3841	1.0	-22.8	0	0.07012686	0.441	-0.1518081428571429	-0.178551575	-7.682531643140443	16	18	11	3UTR	MIRT052186	1	1
hsa-let-7b-5p	NM_001278549	PDK1	TGAGGTAGTAGGTTGTGTGGTT#AGCATGATCTTGGCTCACTGCAACCTCTGCCTCC#.(((((((.(((((((((((((#.))).))).)))))))))))))).	9602	9636	1.0	-25.9	1	0.009397013	0.485	-0.3033605333333333	-0.1231162	-4.849714495602881	20	24	14	3UTR	MIRT032356	0	0
hsa-let-7b-5p	NM_001278669	NFATC1	TGAGGTAGTAGGTTGTGTGGTT#ACGTACACTCCTGCTGCCTTAC#((((((((((((..(((((((.#)).))))).)))))))))))).	3677	3699	1.0	-24.3	1	0.02008925	0.515	0.8859951041666668	0.2482765888750001	-6.083544976388314	19	22	12	3UTR	MIRT052157	0	0
hsa-let-7b-5p	NM_001278670	NFATC1	TGAGGTAGTAGGTTGTGTGGTT#GGCTGTCACGTACACTCCTGCTGCCTTAC#((((((((((((..(((((((.#.)).))))).)))))))))))).	2980	3009	1.0	-24.8	1	0.02008925	0.515	0.0	0.0	-6.083544976388314	19	23	12	3UTR	MIRT052157	0	0
hsa-let-7b-5p	NM_001278672	NFATC1	TGAGGTAGTAGGTTGTGTGGTT#GGCTGTCACGTACACTCCTGCTGCCTTAC#((((((((((((..(((((((.#.)).))))).)))))))))))).	2739	2768	1.0	-24.8	1	0.02008925	0.515	0.1231343858333333	0.30876400612499993	-6.083544976388314	19	23	12	3UTR	MIRT052157	0	0
hsa-let-7b-5p	NM_001278673	NFATC1	TGAGGTAGTAGGTTGTGTGGTT#ACGTACACTCCTGCTGCCTTAC#((((((((((((..(((((((.#)).))))).)))))))))))).	2337	2359	1.0	-24.3	1	0.02008925	0.515	0.4260804166666667	0.3438602373750002	-6.083544976388314	19	22	12	3UTR	MIRT052157	0	0
hsa-let-7b-5p	NM_001280791	SURF4	TGAGGTAGTAGGTTGTGTGGTT#CCACGGACTCAACCCAGTTACCTCAC#((((((((..((((((((((..#)))))....)))))...)))))))).	1897	1923	1.0	-20.6	1	0.06095471	0.441	2.327255621428571	0.9056708849999995	-6.236470572775607	18	26	8	3UTR	MIRT565452	1	1
hsa-let-7b-5p	NM_001280792	SURF4	TGAGGTAGTAGGTTGTGTGGTT#CCACGGACTCAACCCAGTTACCTCAC#((((((((..((((((((((..#)))))....)))))...)))))))).	1612	1638	1.0	-20.6	1	0.06095471	0.441	0.5984475571428571	0.57163397875	-6.236470572775607	18	26	8	3UTR	MIRT565452	1	1
hsa-let-7b-5p	NM_001281501	FADS2	TGAGGTAGTAGGTTGTGTGGTT#ACCACATGGCCTTGCCTCGG#(((((((..((((((((((((.#))))))))))))))))))).	2501	2521	1.0	-26.1	1	6.593594e-05	0.397	-0.3036216666666667	-0.2004385225	-7.307599033628058	19	20	19	3UTR	MIRT001634	0	0
hsa-let-7b-5p	NM_001281502	FADS2	TGAGGTAGTAGGTTGTGTGGTT#ACCACATGGCCTTGCCTCGG#(((((((..((((((((((((.#))))))))))))))))))).	2570	2590	1.0	-26.1	1	6.593594e-05	0.397	-0.3036216666666667	-0.2004385225	-7.307599033628058	19	20	19	3UTR	MIRT001634	0	0
hsa-let-7b-5p	NM_001281933	NCAPG2	TGAGGTAGTAGGTTGTGTGGTT#AACGCAGTGGTGTGATCTCAGTTCACTGCAACCTCTGCCTCC#.(((((((.(((((((((((..#.)))).)))))))))))))).	4554	4596	1.0	-25.3	1	0.02361962	0.5	1.8310156166666662	2.4024904849999995	-4.849714495602881	18	21	14	3UTR	MIRT005219	0	0
hsa-let-7b-5p	NM_001282205	SIGMAR1	TGAGGTAGTAGGTTGTGTGGTT#TCACACAGCCCCTGCTGCATTCT#.(((((((((((((((((((..#))))))))))..)))))).))).	1383	1406	1.0	-22.9	1	0.0003917416	0.603	0.0	0.0	-3.793324837357118	19	23	10	3UTR	MIRT005041	0	1
hsa-let-7b-5p	NM_001282207	SIGMAR1	TGAGGTAGTAGGTTGTGTGGTT#TCACACAGCCCCTGCTGCATTCT#.(((((((((((((((((((..#))))))))))..)))))).))).	1541	1564	1.0	-22.9	1	0.0003917416	0.603	0.0	0.0	-3.793324837357118	19	23	10	3UTR	MIRT005041	0	1
hsa-let-7b-5p	NM_001282208	SIGMAR1	TGAGGTAGTAGGTTGTGTGGTT#TCACACAGCCCCTGCTGCATTCT#.(((((((((((((((((((..#))))))))))..)))))).))).	1624	1647	1.0	-22.9	1	0.0003917416	0.603	0.0	0.0	-3.793324837357118	19	23	10	3UTR	MIRT005041	0	1
hsa-let-7b-5p	NM_001282209	SIGMAR1	TGAGGTAGTAGGTTGTGTGGTT#TCACACAGCCCCTGCTGCATTCT#.(((((((((((((((((((..#))))))))))..)))))).))).	1461	1484	1.0	-22.9	1	0.0003917416	0.603	0.0	0.0	-3.793324837357118	19	23	10	3UTR	MIRT005041	0	1
hsa-let-7b-5p	NM_001282291	ABCB8	TGAGGTAGTAGGTTGTGTGGTT#CCACACCCTTGCTAGGACCTCAC#((((((((((((..((((((..#)))))).))))))...)))))).	2718	2741	1.0	-22.3	1	0.00287606	0.426	-0.08513397333333338	-0.3675174662499999	-6.083544976388314	18	23	6	3UTR	MIRT051898	0	0
hsa-let-7b-5p	NM_001282736	PLXDC2	TGAGGTAGTAGGTTGTGTGGTT#GACCATGCAGCTGTAAACCTTC#.(((((....((((((((((((#))))))))))))....))))).	8819	8841	1.0	-21.4	0	0.014524	0.588	0.0	0.0	-9.94954242798301	17	22	12	3UTR	MIRT032203	0	0
hsa-let-7b-5p	NM_001282763	CDV3	TGAGGTAGTAGGTTGTGTGGTT#GACTACCTCAGATTTGCTGCACTCAT#((((((((((((((..((((((#))))))....)))))))))).)))).	983	1009	1.0	-20.4	1	0.02550835	0.559	3.4019233333333334	3.6947157125	-4.906073086755913	20	26	10	3UTR	MIRT255311	1	1
hsa-let-7b-5p	NM_001282765	CDV3	TGAGGTAGTAGGTTGTGTGGTT#CCACGTGGACTTGCTCCTCT#.((((.((((((((.(((((..#)))))..)))))))))))).	908	928	1.0	-22.3	0	0.002620558	0.544	0.46074309	0.5054667692499999	-6.429733158800799	17	20	12	3UTR	MIRT255311	1	1
hsa-let-7b-5p	NM_001282765	CDV3	TGAGGTAGTAGGTTGTGTGGTT#GACTACCTCAGATTTGCTGCACTCAT#((((((((((((((..((((((#))))))....)))))))))).)))).	1916	1942	1.0	-20.4	1	0.02550835	0.559	3.4019233333333334	3.6947157125	-4.906073086755913	20	26	10	3UTR	MIRT255311	1	1
hsa-let-7b-5p	NM_001282868	RHD	TGAGGTAGTAGGTTGTGTGGTT#ACCATCTTGGCTCACTGCAACCTCTACCTCC#.(((((((.(((((((((((((#.))).))).)))))))))))))).	1489	1520	1.0	-25.9	1	0.02089599	0.441	0.023477533333333345	-0.0008965125000000088	-4.849714495602881	20	24	14	3UTR	MIRT453404	0	0
hsa-let-7b-5p	NM_001282869	RHD	TGAGGTAGTAGGTTGTGTGGTT#ACCATCTTGGCTCACTGCAACCTCTACCTCC#.(((((((.(((((((((((((#.))).))).)))))))))))))).	1520	1551	1.0	-25.9	1	0.02089599	0.441	0.0	0.0	-4.849714495602881	20	24	14	3UTR	MIRT453404	0	0
hsa-let-7b-5p	NM_001282870	RHD	TGAGGTAGTAGGTTGTGTGGTT#ACCATCTTGGCTCACTGCAACCTCTACCTCC#.(((((((.(((((((((((((#.))).))).)))))))))))))).	1623	1654	1.0	-25.9	1	0.02089599	0.441	0.023477533333333345	-0.0008965125000000088	-4.849714495602881	20	24	14	3UTR	MIRT453404	0	0
hsa-let-7b-5p	NM_001282871	RHD	TGAGGTAGTAGGTTGTGTGGTT#ACCATCTTGGCTCACTGCAACCTCTACCTCC#.(((((((.(((((((((((((#.))).))).)))))))))))))).	1690	1721	1.0	-25.9	1	0.02089599	0.441	0.023477533333333345	-0.0008965125000000088	-4.849714495602881	20	24	14	3UTR	MIRT453404	0	0
hsa-let-7b-5p	NM_001282872	RHD	TGAGGTAGTAGGTTGTGTGGTT#ACCATCTTGGCTCACTGCAACCTCTACCTCC#.(((((((.(((((((((((((#.))).))).)))))))))))))).	1793	1824	1.0	-25.9	1	0.02089599	0.441	0.023477533333333345	-0.0008965125000000088	-4.849714495602881	20	24	14	3UTR	MIRT453404	0	0
hsa-let-7b-5p	NM_001283052	ICOSLG	TGAGGTAGTAGGTTGTGTGGTT#CCACTGTCACCACTGCCTCC#.((((((((.(((...((((..#))))....))))))))))).	4178	4198	1.0	-21.5	1	0.5022442	0.397	0.0	0.0	-6.861169863759951	15	20	11	3UTR	MIRT475382	0	0
hsa-let-7b-5p	NM_001284430	UTP15	TGAGGTAGTAGGTTGTGTGGTT#CCACTGCAACCTCTGCCCTCC#.(((((((.(((((((((((..#)))).)))))))))))).)).	2786	2807	1.0	-23.8	1	0.004489751	0.426	-0.171636	-0.2620934912499999	-4.849714495602881	18	21	12	3UTR	MIRT032450	1	0
hsa-let-7b-5p	NM_001284430	UTP15	TGAGGTAGTAGGTTGTGTGGTT#GACCTCAAGTGATCTACCTGCCTCT#.(((((((((((((.((.((((#)))).))...))))))).)))))).	2939	2964	1.0	-21.3	1	0.0196885	0.485	-0.20956573571428574	-0.10279046000000001	-4.528774397607753	19	25	7	3UTR	MIRT032450	1	0
hsa-let-7b-5p	NM_001284431	UTP15	TGAGGTAGTAGGTTGTGTGGTT#CCACTGCAACCTCTGCCCTCC#.(((((((.(((((((((((..#)))).)))))))))))).)).	2670	2691	1.0	-23.8	1	0.004489751	0.426	-0.171636	-0.2620934912499999	-4.849714495602881	18	21	12	3UTR	MIRT032450	1	0
hsa-let-7b-5p	NM_001284431	UTP15	TGAGGTAGTAGGTTGTGTGGTT#GACCTCAAGTGATCTACCTGCCTCT#.(((((((((((((.((.((((#)))).))...))))))).)))))).	2823	2848	1.0	-21.3	1	0.0196885	0.485	-0.20956573571428574	-0.10279046000000001	-4.528774397607753	19	25	7	3UTR	MIRT032450	1	0
hsa-let-7b-5p	NM_001286188	SCAF8	TGAGGTAGTAGGTTGTGTGGTT#AATCATGCAGCCTCCTCAG#(((((....(((((((((((((#)))))))))))))))))).	4903	4922	1.0	-21.6	0	0.0008530958	0.672	2.4961470769230774	1.1503343361842107	-10.752244329692425	18	19	18	3UTR	MIRT052039	0	0
hsa-let-7b-5p	NM_001286189	SCAF8	TGAGGTAGTAGGTTGTGTGGTT#AATCATGCAGCCTCCTCAG#(((((....(((((((((((((#)))))))))))))))))).	4867	4886	1.0	-21.6	0	0.0008530958	0.672	2.4961470769230774	1.1503343361842107	-10.752244329692425	18	19	18	3UTR	MIRT052039	0	0
hsa-let-7b-5p	NM_001286272	TPT1	TGAGGTAGTAGGTTGTGTGGTT#AACCCCAGCTGTTTACCTCAT#((((((((..(((((.(.((((#))))))))))..)))))))).	2922	2943	1.0	-20.5	1	0.02294656	0.603	1.5475458875	1.2770377412500002	-6.46951965307922	18	21	10	3UTR	MIRT052061	0	0
hsa-let-7b-5p	NM_001286273	TPT1	TGAGGTAGTAGGTTGTGTGGTT#AACCCCAGCTGTTTACCTCAT#((((((((..(((((.(.((((#))))))))))..)))))))).	2683	2704	1.0	-20.5	1	0.02294656	0.603	0.05111450000000001	0.016708178750000052	-6.46951965307922	18	21	10	3UTR	MIRT052061	0	0
hsa-let-7b-5p	NM_001286433	NME4	TGAGGTAGTAGGTTGTGTGGTT#AGCCACCAACTTCAGTGCCTTT#.((((((.(((((((.((((((#)))))))))))).).)))))).	631	653	1.0	-21.9	1	0.0207448	0.456	0.1798249125	0.09957425999999997	-6.340008846841362	19	22	12	3UTR	MIRT052182	1	1
hsa-let-7b-5p	NM_001286435	NME4	TGAGGTAGTAGGTTGTGTGGTT#GCCCTTACCACCCCATCCCCCACGCAGGACCAACTACCTCC#.((((((((.((((((((((..#.)))))))..))).)))))))).	708	749	1.0	-27.4	1	0.004179161	0.412	0.0	0.0	-5.035831305685297	18	23	8	3UTR	MIRT052182	1	1
hsa-let-7b-5p	NM_001286440	NME4	TGAGGTAGTAGGTTGTGTGGTT#GCCCTTACCACCCCATCCCCCACGCAGGACCAACTACCTCC#.((((((((.((((((((((..#.)))))))..))).)))))))).	921	962	1.0	-27.4	1	0.004179161	0.412	0.0	0.0	-5.035831305685297	18	23	8	3UTR	MIRT052182	1	1
hsa-let-7b-5p	NM_001287216	AMD1	TGAGGTAGTAGGTTGTGTGGTT#ACCACAATTTACGCTTCAA#((((((.((((((..((((((.#)))))))))))))))))).	3013	3032	1.0	-17.2	0	0.0301768	0.691	3.69158	2.895741026785714	-7.073550458844025	18	19	18	3UTR	MIRT705753	0	0
hsa-let-7b-5p	NM_001287427	CCND3	TGAGGTAGTAGGTTGTGTGGTT#GCCACCCACCTCCCTGCCTCC#.(((((((.((((.(.(((((.#)))))).))))..))))))).	1586	1607	1.0	-22.7	1	0.0008254235	0.353	2.1407284142857144	4.984982925	-5.9396034934269	17	21	7	3UTR	MIRT052181	0	0
hsa-let-7b-5p	NM_001289410	FAM104A	TGAGGTAGTAGGTTGTGTGGTT#GACACAGGCACTTCTCTCCACAGCCTGCTAACCTA#..(((((((((((((((.((..#.)))))))))))))).))).	1999	2034	1.0	-23.4	1	0.001357397	0.485	4.50062125	3.0775591425000006	-4.95700071937229	17	20	14	3UTR	MIRT574787	1	1
hsa-let-7b-5p	NM_001289411	FAM104A	TGAGGTAGTAGGTTGTGTGGTT#GACACAGGCACTTCTCTCCACAGCCTGCTAACCTA#..(((((((((((((((.((..#.)))))))))))))).))).	2017	2052	1.0	-23.4	1	0.001357397	0.485	3.5181717750000003	3.3466909000000005	-4.95700071937229	17	20	14	3UTR	MIRT574787	1	1
hsa-let-7b-5p	NM_001289412	FAM104A	TGAGGTAGTAGGTTGTGTGGTT#GACACAGGCACTTCTCTCCACAGCCTGCTAACCTA#..(((((((((((((((.((..#.)))))))))))))).))).	1931	1966	1.0	-23.4	1	0.001357397	0.485	0.0	0.0	-4.95700071937229	17	20	14	3UTR	MIRT574787	1	1
hsa-let-7b-5p	NM_001290050	UHRF1	TGAGGTAGTAGGTTGTGTGGTT#ACCAAAGTTTGCAGCCTATACCTCAA#((((((.((((((((((((((.#)))).....)))))))))))))))).	4086	4112	1.0	-23.2	0	0.1312717	0.706	2.866267721052631	0.8605404987499998	-5.4812609810729835	20	26	16	3UTR	MIRT001580	0	0
hsa-let-7b-5p	NM_001290051	UHRF1	TGAGGTAGTAGGTTGTGTGGTT#ACCAAAGTTTGCAGCCTATACCTCAA#((((((.((((((((((((((.#)))).....)))))))))))))))).	3623	3649	1.0	-23.2	0	0.1312717	0.706	2.866267721052631	0.8605404987499998	-5.4812609810729835	20	26	16	3UTR	MIRT001580	0	0
hsa-let-7b-5p	NM_001290052	UHRF1	TGAGGTAGTAGGTTGTGTGGTT#ACCAAAGTTTGCAGCCTATACCTCAA#((((((.((((((((((((((.#)))).....)))))))))))))))).	3648	3674	1.0	-23.2	0	0.1312717	0.706	2.866267721052631	0.8605404987499998	-5.4812609810729835	20	26	16	3UTR	MIRT001580	0	0
hsa-let-7b-5p	NM_018360	TXLNG	TGAGGTAGTAGGTTGTGTGGTT#GGCCACATGCCTAGAATCCTA#..(((...((((.(((((((((#)))))))))))))....))).	2162	2183	1.0	-18.8	0	0.002472844	0.588	-0.45311655555555547	0.27756748750000004	-12.00441155728353	16	21	13	3UTR	MIRT259476	1	1
hsa-let-7b-5p	NM_018383	WDR33	TGAGGTAGTAGGTTGTGTGGTT#AGCTACCAGCCTGGCTGGCCCTGTCCTGTCCACCCTCAT#(((((((((((((((.((((((#))))))))))))).)))................))))).	4364	4403	1.0	-20.8	1	0.1461977	0.426	-0.15732081999999997	0.027680650499999987	-4.1706235265052785	21	39	13	3UTR	MIRT032334	0	0
hsa-let-7b-5p	NM_018385	LSG1	TGAGGTAGTAGGTTGTGTGGTT#GGCCATATAAGATGTGCCTGCTTCTCC#.((((.((((((((((((((((#)))))))))......))))))))))).	3142	3169	1.0	-21.0	0	0.02842561	0.515	3.475452554545454	2.6637394612499996	-5.694283598550164	20	27	11	3UTR	MIRT032473	0	0
hsa-let-7b-5p	NM_018428	UTP6	TGAGGTAGTAGGTTGTGTGGTT#TTACTGCAACCTCTGCCTCC#.(((((((.(((((((((((..#)))).)))))))))))))).	4049	4069	1.0	-23.2	1	0.0004876471	0.456	3.798839500000001	3.40660858	-4.849714495602881	18	20	14	3UTR	MIRT032485	0	0
hsa-let-7b-5p	NM_018454	NUSAP1	TGAGGTAGTAGGTTGTGTGGTT#AGCTACATAGCCCTATCG#...(((((..((((((((((((#))))))))))))))))).	2029	2047	1.0	-19.6	0	0.009379432	0.662	0.2455674333333334	0.21871958875000003	-8.81343632025268	17	18	17	3UTR	MIRT052111	0	0
hsa-let-7b-5p	NM_018566	YOD1	TGAGGTAGTAGGTTGTGTGGTT#GGGTTGAAGCCTACTACCTCAC#((((((((((((((........#.)))))))))))))).	1240	1262	1.0	-24.0	1	0.01581462	0.529	0.5487318999999999	0.33557231249999997	-4.906073086755913	14	16	14	3UTR	MIRT510513	1	1
hsa-let-7b-5p	NM_018662	DISC1	TGAGGTAGTAGGTTGTGTGGTT#CCGCAATCTCGGCTCACTGCAACCTCTACCTCC#.(((((((.(((((((((((((#.))).))).)))))))))))))).	5862	5895	1.0	-26.0	1	0.001094966	0.412	-0.2855152	-0.15394170812499997	-4.849714495602881	20	24	14	3UTR	MIRT452946	0	0
hsa-let-7b-5p	NM_018662	DISC1	TGAGGTAGTAGGTTGTGTGGTT#AGCTATTCTACTGCCTCAG#((((((((((((....((((((#)))))))))))))))))).	5903	5922	1.0	-21.3	1	0.004613248	0.471	0.10049858333333335	-0.34186963375	-7.052043616942562	18	19	18	3UTR	MIRT452946	0	0
hsa-let-7b-5p	NM_019001	XRN1	TGAGGTAGTAGGTTGTGTGGTT#CTGCATTACCTAATAATTACCTCAG#(((((((((((((.((((((..#)))))).))))....))))))))).	8088	8113	1.0	-21.1	1	0.1363317	0.721	2.840625908235294	3.5425373715	-4.794414363722071	19	25	9	3UTR	MIRT032310	1	1
hsa-let-7b-5p	NM_019008	MIEF1	TGAGGTAGTAGGTTGTGTGGTT#GCCTCACAGGGTTCCTGCTGCCTGGT#(.(((((((((((((((.(((.#))).)))))....)))))))))).).	1956	1982	1.0	-25.0	1	0.0001197483	0.441	0.6777732105263157	2.2558338947499994	-5.101250328216836	19	26	10	3UTR	MIRT473240	1	1
hsa-let-7b-5p	NM_019018	OTULINL	TGAGGTAGTAGGTTGTGTGGTT#GGCTGCAGTGCAGTGGCACAATCTCGGCTCACTGCAACCTCTACCTCC#.(((((((.(((((((((((((#.))).))).)))))))))))))).	3826	3874	1.0	-26.0	1	0.01923112	0.412	0.07429950000000002	-0.11062902650000003	-4.849714495602881	20	24	14	3UTR	MIRT001633	0	0
hsa-let-7b-5p	NM_019084	CCNJ	TGAGGTAGTAGGTTGTGTGGTT#AACCCAGCAACCTGGAGTCCAATTTTCAGTATTTTAACTACCTCAA#((((((((((((((((..((((#))))..))))))).......................))))))))).	3231	3277	1.0	-24.8	1	0.0850726	0.676	2.652597328205129	2.1174548599999996	-3.937574446201665	20	46	9	3UTR	MIRT005036	1	1
hsa-let-7b-5p	NM_019087	ARL15	TGAGGTAGTAGGTTGTGTGGTT#AACCCACGACTGTCTGCAGCGTCTCAG#((((((((..(((((((.((((#)))))))))))..)))).....)))).	2630	2657	1.0	-21.3	1	0.0005894001	0.5	4.05558653076923	2.70564359875	-6.236470572775607	19	27	11	3UTR	MIRT005226	0	0
hsa-let-7b-5p	NM_020156	C1GALT1	TGAGGTAGTAGGTTGTGTGGTT#GCCACTGACTCTGCTATTTA#..(((((((((((((.(((((.#))))))))).))))))))).	2855	2875	1.0	-18.7	1	0.0009697959	0.632	0.7577744285714286	0.2081607475	-5.1900497996759025	18	20	9	3UTR	MIRT052034	1	1
hsa-let-7b-5p	NM_020362	PITHD1	TGAGGTAGTAGGTTGTGTGGTT#GGCTGCCACAGCCTCTGCCA#...(((((.(((((((((((((#)))))).)))))))))))).	827	847	1.0	-22.8	0	3.489754e-06	0.441	1.090773171428571	0.7433590574999999	-7.570929851924502	18	20	12	3UTR	MIRT032469	0	0
hsa-let-7b-5p	NM_020440	PTGFRN	TGAGGTAGTAGGTTGTGTGGTT#AGCCTTTTTGGCAGGAATAATAAGCAATACTACACAACTTGCTACTTTC#.((((((((((((((((((((.#.)))))))))))))))))))).	5948	5997	1.0	-28.7	1	0.09905563	0.662	1.6536118000000002	1.6547214674999997	-3.793324837357118	20	22	20	3UTR	MIRT051989	0	0
hsa-let-7b-5p	NM_020774	MIB1	TGAGGTAGTAGGTTGTGTGGTT#AACTCTCTGAATCTGCTACCTCT#.(((((((((((((..(.((((#))))..)..))))))))))))).	6108	6131	1.0	-21.5	1	0.007023231	0.588	1.306395846153846	0.21348301750000004	-4.761823477911366	18	23	13	3UTR	MIRT052189	1	1
hsa-let-7b-5p	NM_020776	KIAA1328	TGAGGTAGTAGGTTGTGTGGTT#GCCCACCCTGCTGCCCAA#((.(((((((((..(((.(((.#))))))))))))))))).	4336	4354	1.0	-22.0	0	0.1161746	0.485	-0.22464572222222223	0.06351970375000004	-7.641084450694762	17	18	17	3UTR	MIRT702487	0	0
hsa-let-7b-5p	NM_020776	KIAA1328	TGAGGTAGTAGGTTGTGTGGTT#AGCCATCAGCCTGGCAGCTGCCCAT#((.((((((((((((.((((((#))))))))))))....)))))))).	2315	2340	1.0	-22.1	0	0.0001357625	0.441	0.27506192500000004	-0.09338370800000001	-5.728163000811725	20	25	12	3UTR	MIRT702487	0	0
hsa-let-7b-5p	NM_020786	PDP2	TGAGGTAGTAGGTTGTGTGGTT#CCACACAATCCTTCTACCTCT#.(((((((.(((((((((((..#)))))))).))).))))))).	2672	2693	1.0	-28.6	1	0.4456892	0.544	0.25266550000000015	0.12554535125	-4.849714495602881	18	21	8	3UTR	MIRT052354	1	1
hsa-let-7b-5p	NM_020802	CEP126	TGAGGTAGTAGGTTGTGTGGTT#GGCCACATAGCTACCTACA#....((((..((((((((((((#))))))))))))..)))).	4840	4859	1.0	-21.2	0	0.01185817	0.574	-0.22486416166666667	0.0027187972500000157	-11.84545859521187	16	19	12	3UTR	MIRT052032	0	0
hsa-let-7b-5p	NM_020993	BCL7A	TGAGGTAGTAGGTTGTGTGGTT#CCACGGTCACCTGCTGCCC#...((((((((((..(((((..#)))))...)))))))))).	1912	1931	1.0	-23.2	0	0.009978046	0.368	0.2703789	0.32166052499999975	-8.10682967144978	15	19	10	3UTR	MIRT002399	1	1
hsa-let-7b-5p	NM_021117	CRY2	TGAGGTAGTAGGTTGTGTGGTT#GACCACCTCCGCCTACTTCTCC#.((((.(((((((.(.((((((#))))))..).))))))))))).	3775	3797	1.0	-21.6	0	0.1017702	0.412	-0.14868997142857143	0.23807110375	-6.784172596374183	18	22	11	3UTR	MIRT180600	1	1
hsa-let-7b-5p	NM_021734	SLC25A19	TGAGGTAGTAGGTTGTGTGGTT#ACCTATCAGCCCTGCCTG#..((((((..(((((...(((.#)))...))))))))))).	1453	1471	1.0	-17.6	1	0.0335648	0.441	0.5833780000000001	1.6312481350000003	-7.488945926249844	14	18	11	3UTR	MIRT032289	0	0
hsa-let-7b-5p	NM_022845	CBFB	TGAGGTAGTAGGTTGTGTGGTT#ATCAAGCGATCCTCCTGCCTTAG#((((((((.(((((((.((((.#)))).)))).))).)))))))).	1529	1552	1.0	-20.0	1	0.02258181	0.441	-0.2180139375	0.23058803875	-4.993964104447428	19	23	8	3UTR	MIRT005054	0	0
hsa-let-7b-5p	NM_024096	DCTPP1	TGAGGTAGTAGGTTGTGTGGTT#GGCCCAGCAGCCTCTAGAAGGTAGCCTCC#.(((((((.(((((((..((((#))))..)))))))))........))))).	691	720	1.0	-19.6	1	0.0002539684	0.485	1.7546154285714284	1.2221633875	-4.849714495602881	18	29	9	3UTR	MIRT005221	0	0
hsa-let-7b-5p	NM_024738	SPRING1	TGAGGTAGTAGGTTGTGTGGTT#AAGCACACAACGGTACTACGTTT#.((.((((((.((((((((.((#)).))))))))..)))))).)).	8069	8092	1.0	-21.4	0	0.004199581	0.559	3.2666524	4.265280280000001	-9.650121587726659	18	23	8	3UTR	MIRT052145	0	0
hsa-let-7b-5p	NM_024771	NAA40	TGAGGTAGTAGGTTGTGTGGTT#GCCTCACCCTGCTGGCTCC#.(((.(((((((..(((.(((.#))).)))))))))).))).	2524	2543	1.0	-21.6	0	0.0007819619	0.412	-0.0077662857142856935	0.10066308375000022	-10.05833254235624	16	19	10	3UTR	MIRT005239	0	0
hsa-let-7b-5p	NM_024821	CCDC134	TGAGGTAGTAGGTTGTGTGGTT#AGCTCACTGCAGCCTCTATCTCC#.(((((((.(((((((((((((#))).))).)))))))))))))).	6236	6259	1.0	-23.2	1	0.0004273322	0.426	-0.8060004	-0.21095338749999995	-4.849714495602881	20	23	14	3UTR	MIRT032346	0	0
hsa-let-7b-5p	NM_024821	CCDC134	TGAGGTAGTAGGTTGTGTGGTT#GCCAGCAGCTCCTCCTGCCTCGA#((((((((.(((...((((((.#)))).))...))).)))))))).	6536	6559	1.0	-22.1	1	0.0005276643	0.412	0.14988058999999998	-0.11798286700000005	-7.875384194884712	17	23	8	3UTR	MIRT032346	0	0
hsa-let-7b-5p	NM_024852	AGO3	TGAGGTAGTAGGTTGTGTGGTT#CCACAAATCCTGCTACCTGAC#(.((((((((((...(((((..#)))))...)))))))))).).	12881	12902	1.0	-25.5	1	0.002438313	0.529	0.404754284	0.2512765012499999	-7.98267041865412	16	21	10	3UTR	MIRT005037	1	1
hsa-let-7b-5p	NM_024852	AGO3	TGAGGTAGTAGGTTGTGTGGTT#ACCGCACCCGGCCTACTATTCTTT#.((((((((((((((((((((.#)))))))..)))))))))).))).	4186	4210	1.0	-23.7	1	0.06224596	0.559	0.19074083043478265	0.8877836287499999	-3.793324837357118	20	24	10	3UTR	MIRT005037	1	1
hsa-let-7b-5p	NM_024940	DOCK5	TGAGGTAGTAGGTTGTGTGGTT#AGCCGCATCTGCTACCTGAT#(.(((((((((...((((((((#))))))))))))))))).).	6734	6754	1.0	-22.9	1	0.006596084	0.544	0.30230873333333336	0.7582790649999998	-10.594024167999843	18	20	17	3UTR	MIRT001638	0	0
hsa-let-7b-5p	NM_025009	CEP135	TGAGGTAGTAGGTTGTGTGGTT#ACACAAATTCTACCTCT#.(((((((....((((((....#))))))...))))))).	3690	3707	1.0	-18.2	1	0.06250693	0.691	3.3483057142857144	1.9206432799999997	-12.263798748937765	13	17	7	3UTR	MIRT502782	1	1
hsa-let-7b-5p	NM_025073	SIKE1	TGAGGTAGTAGGTTGTGTGGTT#ACTTTATAGCCTGGTGCCTTT#.((((((.(((((((((.(((.#))).))))))))).)))))).	1237	1258	1.0	-22.0	1	0.007936686	0.588	0.20437755555555556	0.07520450475000001	-6.106959766537749	18	21	9	3UTR	MIRT052225	0	0
hsa-let-7b-5p	NM_025155	PAAF1	TGAGGTAGTAGGTTGTGTGGTT#TACAGCTTCTGCCTTAA#((((((((.((((((((.....#)))))))))))))))).	2956	2973	1.0	-19.3	1	0.0001684179	0.471	-0.121315375	0.11173548750000004	-4.993964104447428	16	17	16	3UTR	MIRT032270	0	0
hsa-let-7b-5p	NM_025205	MED28	TGAGGTAGTAGGTTGTGTGGTT#GGCTCACTGCAACCTCTGCCTCC#.(((((((.(((((((((((((#))).))).)))))))))))))).	8896	8919	1.0	-25.7	1	0.002766653	0.426	-0.22463271999999998	0.08059307124999994	-4.849714495602881	20	23	14	3UTR	MIRT052202	1	1
hsa-let-7b-5p	NM_025205	MED28	TGAGGTAGTAGGTTGTGTGGTT#GACCACGCGGCTGGGCACGTCCTCC#.((((..((.((((((((((((#))))))))))))..))....)))).	10605	10630	1.0	-22.8	0	0.0005054443	0.456	3.4906598333333325	2.2087708775	-8.480476601749661	18	25	12	3UTR	MIRT052202	1	1
hsa-let-7b-5p	NM_025205	MED28	TGAGGTAGTAGGTTGTGTGGTT#CCGCCTGCCTCTGCCTCC#.(((((((.((((.(.((((..#))))).))))))))))).	3946	3964	1.0	-22.8	1	0.0798264	0.412	0.02998671428571428	-0.030138049999999993	-5.9396034934269	16	18	11	3UTR	MIRT052202	1	1
hsa-let-7b-5p	NM_030885	MAP4	TGAGGTAGTAGGTTGTGTGGTT#GGCCTATTTCTGCTGATGCCTGAGCAAACAACCTGCTTCCTCT#.((((.((((((((((.((.((#.)).)).)))))))))).)))).	541	584	1.0	-24.7	0	0.0509364	0.5	0.23087174800000004	0.260812919	-5.694283598550164	18	23	10	3UTR	MIRT052234	0	0
hsa-let-7b-5p	NM_001144884	SLC30A7	TGAGGTAGTAGGTTGTGTGGTT#AGCTCACTGCAACCTCTGCTTCC#.(((((((.(((((((((((((#))).))).)))))))))))))).	1727	1750	1.0	-23.1	1	0.0009181032	0.441	0.040745106666666656	0.19766443000000006	-4.849714495602881	20	23	14	3UTR	MIRT032430	1	0
hsa-let-7b-5p	NM_001144884	SLC30A7	TGAGGTAGTAGGTTGTGTGGTT#ACCCTACAACACTTTACCTCC#.(((((((.((((((((.(((.#))).)))))).))))))))).	7532	7553	1.0	-20.0	1	0.6939783	0.632	0.4594541777777777	0.507624634125	-4.849714495602881	18	21	9	3UTR	MIRT032430	1	0
hsa-let-7b-5p	NM_001145365	ZNF652	TGAGGTAGTAGGTTGTGTGGTT#AGCCACCACGTCCAACTGCCTTAT#(((((((((.((.(((((((((#)))))).))).)).))))))))).	5159	5183	1.0	-24.2	1	0.001453699	0.559	0.171968486	0.013190574249999986	-6.469211527196086	20	24	9	3UTR	MIRT052080	1	1
hsa-let-7b-5p	NM_001145513	SCRN1	TGAGGTAGTAGGTTGTGTGGTT#ACCAGTTGGGCCTAATCCTGCCTCAT#((((((((((((((...((((.#))))....))))))...)))))))).	2862	2888	1.0	-22.6	1	0.0004466442	0.5	0.34722251764705886	0.44116741250000013	-4.906073086755913	18	26	8	3UTR	MIRT032457	0	0
hsa-let-7b-5p	NM_001145514	SCRN1	TGAGGTAGTAGGTTGTGTGGTT#ACCAGTTGGGCCTAATCCTGCCTCAT#((((((((((((((...((((.#))))....))))))...)))))))).	2794	2820	1.0	-22.6	1	0.0004466442	0.5	0.27268881176470583	0.3662479625000002	-4.906073086755913	18	26	8	3UTR	MIRT032457	0	0
hsa-let-7b-5p	NM_001145515	SCRN1	TGAGGTAGTAGGTTGTGTGGTT#ACCAGTTGGGCCTAATCCTGCCTCAT#((((((((((((((...((((.#))))....))))))...)))))))).	2686	2712	1.0	-22.6	1	0.0004466442	0.5	0.4965498611764707	0.07537201175000009	-4.906073086755913	18	26	8	3UTR	MIRT032457	0	0
hsa-let-7b-5p	NM_001146188	TOX3	TGAGGTAGTAGGTTGTGTGGTT#AACCACACTTCCAGGCTATCTGAA#(.(((((((.((..((((((((#))))))))..))..))))))).).	2277	2301	1.0	-24.3	1	0.0003121879	0.574	3.9411662499999998	3.0099752037500003	-8.489727326731664	18	24	8	3UTR	MIRT052048	0	0
hsa-let-7b-5p	NM_001146699	RBM19	TGAGGTAGTAGGTTGTGTGGTT#CCAGCAGCCTCTGCCCG#.(.(((((.(((((((.(((..#)))))))))))))))).	3987	4004	1.0	-20.3	0	0.0004122601	0.471	0.7650984285714285	1.5853320387499996	-6.407253969909329	16	17	16	3UTR	MIRT001601	0	1
hsa-let-7b-5p	NM_001159547	BEND4	TGAGGTAGTAGGTTGTGTGGTT#GCCGCTCTCAATGGCTTGTTGCCTCC#.((((((((((((((((((((.#))))).....))))))))))))))).	5888	5914	1.0	-19.9	1	0.0001907768	0.471	1.1032664799999998	0.44228744499999995	-3.793324837357118	20	26	15	3UTR	MIRT549205	1	1
hsa-let-7b-5p	NM_001159547	BEND4	TGAGGTAGTAGGTTGTGTGGTT#GACCTACAGCTTTTGCCTGAG#(.((((((.((((((((.((((#)))))))))))))))))).).	4357	4378	1.0	-19.6	1	0.0006545863	0.485	0.49588019999999994	0.005258836249999999	-6.157639986462598	19	21	18	3UTR	MIRT549205	1	1
hsa-let-7b-5p	NM_001160233	ATP1A1	TGAGGTAGTAGGTTGTGTGGTT#GGCCACACACTCTGCATCCGACACCCACCCCCTCTTTGTGTACTTCAG#((((((((((((.(((((((((#))))))))).))))).........................))))))).	3464	3512	1.0	-22.2	1	0.01704491	0.471	1.1747680540540542	2.2118057562499995	-5.226705058867908	21	48	9	3UTR	MIRT052345	0	0
hsa-let-7b-5p	NM_001160234	ATP1A1	TGAGGTAGTAGGTTGTGTGGTT#GGCCACACACTCTGCATCCGACACCCACCCCCTCTTTGTGTACTTCAG#((((((((((((.(((((((((#))))))))).))))).........................))))))).	3273	3321	1.0	-22.2	1	0.01704491	0.471	1.1747680540540542	2.2118057562499995	-5.226705058867908	21	48	9	3UTR	MIRT052345	0	0
hsa-let-7b-5p	NM_001163446	CPA4	TGAGGTAGTAGGTTGTGTGGTT#GGCTCACCACAACCTCTGCCTCC#.(((((((.(((((((((((((#))).))).)))))))))))))).	1799	1822	1.0	-26.1	1	0.0491033	0.426	0.007392766666666632	-0.1459422475	-4.849714495602881	20	23	14	3UTR	MIRT682606	1	1
hsa-let-7b-5p	NM_001163446	CPA4	TGAGGTAGTAGGTTGTGTGGTT#TCATCAACCAGCTGCCTCT#.((((((((.(((((.((((..#))))))))).)))))))).	2509	2528	1.0	-22.1	1	0.03763485	0.559	0.0835191975	0.0722472815	-5.2688803859889095	17	19	9	3UTR	MIRT682606	1	1
hsa-let-7b-5p	NM_001164540	DISC1	TGAGGTAGTAGGTTGTGTGGTT#CCGCAATCTCGGCTCACTGCAACCTCTACCTCC#.(((((((.(((((((((((((#.))).))).)))))))))))))).	5496	5529	1.0	-26.0	1	0.001094966	0.412	0.0	0.0	-4.849714495602881	20	24	14	3UTR	MIRT452946	0	0
hsa-let-7b-5p	NM_001164540	DISC1	TGAGGTAGTAGGTTGTGTGGTT#AGCTATTCTACTGCCTCAG#((((((((((((....((((((#)))))))))))))))))).	5537	5556	1.0	-21.3	1	0.004613248	0.471	0.0	0.0	-7.052043616942562	18	19	18	3UTR	MIRT452946	0	0
hsa-let-7b-5p	NM_001165931	RRM2	TGAGGTAGTAGGTTGTGTGGTT#ATGCAGCCTCACTGCTTCAA#((((((((((((((((((....#))))))))).))))))))).	1723	1743	1.0	-23.1	1	0.001472693	0.632	0.6516859621052632	0.4850904629999998	-3.937574446201665	18	20	9	3UTR	MIRT005050	1	1
hsa-let-7b-5p	NM_001166049	ERCC1	TGAGGTAGTAGGTTGTGTGGTT#CCACAGGCCCTGCTGCCTCT#.(((((((((((.(.(((((..#))))).).))))))))))).	1981	2001	1.0	-29.2	1	2.58192e-05	0.471	-0.22588970909090908	-0.2707988724999999	-5.8179050102739955	17	20	11	3UTR	MIRT052171	0	0
hsa-let-7b-5p	NM_001166393	MTUS1	TGAGGTAGTAGGTTGTGTGGTT#ACCACCAACTCTGCTCAGCCC#...((((((((((((.(((((.#))))))))).)))))..))).	2116	2137	1.0	-20.2	0	0.05470278	0.529	1.2668251466666667	1.8706201137499994	-6.747589273982352	17	21	9	3UTR	MIRT052348	1	1
hsa-let-7b-5p	NM_001167741	MTX3	TGAGGTAGTAGGTTGTGTGGTT#AGCGCAGTCTCGGCTCACTGCAACCTCTACCTCC#.(((((((.(((((((((((((#.))).))).)))))))))))))).	3444	3478	1.0	-26.0	1	0.00175282	0.412	0.15142214666666667	0.22312113125	-4.849714495602881	20	24	14	3UTR	MIRT682447	0	0
hsa-let-7b-5p	NM_001167830	TMED5	TGAGGTAGTAGGTTGTGTGGTT#AGCCATACACCTAATGTACGTCT#.((.(((.((((.(((((((((#)))))))))))))...))).)).	4403	4426	1.0	-20.5	0	0.01908693	0.574	0.4772203733333332	0.7525344719999999	-10.428112654163183	18	23	13	3UTR	MIRT032422	1	1
hsa-let-7b-5p	NM_001168412	TSPAN3	TGAGGTAGTAGGTTGTGTGGTT#ACCTACTTACCTACTACCTG#..(((((((((((.(((.(((.#))))))..))))))))))).	871	891	1.0	-23.1	1	0.5483958	0.544	0.24005942727272725	-0.17634242875000009	-5.813840636892696	17	20	11	3UTR	MIRT052340	0	0
hsa-let-7b-5p	NM_001168412	TSPAN3	TGAGGTAGTAGGTTGTGTGGTT#CCTCCCTCCTGCTGCCTCC#.(((((((((((..(.(.((..#)).))..))))))))))).	3657	3676	1.0	-22.3	1	0.1844584	0.412	-0.0665668727272727	-0.022554924999999993	-6.1723444478473795	15	19	11	3UTR	MIRT052340	0	0
hsa-let-7b-5p	NM_001168412	TSPAN3	TGAGGTAGTAGGTTGTGTGGTT#ACACGAGCCTGCTTCTGTTACCTCC#.(((((((((((((((((....#)))).))))))))......))))).	1011	1036	1.0	-20.4	1	1.867907e-07	0.529	-0.2900433375	-0.27640925875	-3.793324837357118	17	25	8	3UTR	MIRT052340	0	0
hsa-let-7b-5p	NM_001168683	TXLNG	TGAGGTAGTAGGTTGTGTGGTT#GGCCACATGCCTAGAATCCTA#..(((...((((.(((((((((#)))))))))))))....))).	1766	1787	1.0	-18.8	0	0.002472844	0.588	0.058141133333333324	0.33232407350000004	-12.00441155728353	16	21	13	3UTR	MIRT259476	1	1
hsa-let-7b-5p	NM_001172639	CELF1	TGAGGTAGTAGGTTGTGTGGTT#CCACACAGCTTCTGGGCTCTGCCTCT#.(((((((.(((((((((((..#))))))))))).......))))))).	2341	2367	1.0	-24.9	1	0.0002156964	0.441	1.8664960909090909	1.6601931387499997	-4.849714495602881	18	26	11	3UTR	MIRT502846	1	0
hsa-let-7b-5p	NM_001172703	GGA3	TGAGGTAGTAGGTTGTGTGGTT#GCCACTCTACATCCTACTGCTTTG#.(((((((((((.((((((((.#)))))...))).))))))))))).	3076	3100	1.0	-24.2	1	0.08280857	0.441	3.4217021818181816	3.7238916950000007	-5.08245545002336	19	24	11	3UTR	MIRT499496	0	1
hsa-let-7b-5p	NM_001172704	GGA3	TGAGGTAGTAGGTTGTGTGGTT#GCCACTCTACATCCTACTGCTTTG#.(((((((((((.((((((((.#)))))...))).))))))))))).	2120	2144	1.0	-24.2	1	0.08280857	0.441	4.003181781818181	3.8429442325	-5.08245545002336	19	24	11	3UTR	MIRT499496	0	1
hsa-let-7b-5p	NM_001172735	PPP1R16B	TGAGGTAGTAGGTTGTGTGGTT#GGCCATTCCCTCCTTTTCCGCATGCCTCCTGCCTCC#.(((((((.(((.(((((((..#.)))))))))).))))))).	4156	4192	1.0	-24.1	1	0.0004880176	0.397	-0.10753671428571422	0.17395040500000003	-6.138845108269123	17	20	10	3UTR	MIRT052173	1	1
hsa-let-7b-5p	NM_001174084	POLL	TGAGGTAGTAGGTTGTGTGGTT#GCCACCCCTTCTACCTCAC#((((((((.(((..(.(((((.#))))))))).)))))))).	2433	2452	1.0	-22.0	1	0.5624019	0.426	0.25582849999999996	0.40426204749999994	-7.37298371493769	17	19	9	3UTR	MIRT735605	0	1
hsa-let-7b-5p	NM_001174126	SLC11A2	TGAGGTAGTAGGTTGTGTGGTT#TCACTGTAACCTCTACCTCC#.(((((((.((((((.((((..#))))..))))))))))))).	3104	3124	1.0	-21.9	1	0.08246197	0.5	1.5458560000000001	5.0279317375	-5.082763575906494	17	20	13	3UTR	MIRT461171	0	0
hsa-let-7b-5p	NM_001178040	STX3	TGAGGTAGTAGGTTGTGTGGTT#AGCACAGCGCCTGCTGCTTACAG#(((((((((((((..((((.(.#).))))..))))))))))).)).	4538	4561	1.0	-23.0	1	6.46635e-06	0.559	0.016677664285714315	-0.07201928999999997	-5.529863923972706	18	23	11	3UTR	MIRT760988	1	1
hsa-let-7b-5p	NM_001178091	BCAT1	TGAGGTAGTAGGTTGTGTGGTT#CCACAATATACCTAGCTACCTA#..(((((((((((..(((((..#)))))....))))).)))))).	7220	7242	1.0	-21.9	1	0.09531457	0.559	0.14362216333333333	0.35220243525000006	-6.549290197143331	16	22	6	3UTR	MIRT052293	1	1
hsa-let-7b-5p	NM_001178091	BCAT1	TGAGGTAGTAGGTTGTGTGGTT#ACTACCAACCTAGTACA#....(((.(((((((.(((((.#)))))))))))).))).	5602	5619	1.0	-20.0	0	0.01508024	0.676	0.6089661714285715	1.02113349375	-12.093246478122174	15	17	12	3UTR	MIRT052293	1	1
hsa-let-7b-5p	NM_001178092	BCAT1	TGAGGTAGTAGGTTGTGTGGTT#CCACAATATACCTAGCTACCTA#..(((((((((((..(((((..#)))))....))))).)))))).	7148	7170	1.0	-21.9	1	0.09531457	0.559	0.3796301108333333	0.535906045625	-6.549290197143331	16	22	6	3UTR	MIRT052293	1	1
hsa-let-7b-5p	NM_001178092	BCAT1	TGAGGTAGTAGGTTGTGTGGTT#ACTACCAACCTAGTACA#....(((.(((((((.(((((.#)))))))))))).))).	5530	5547	1.0	-20.0	0	0.01508024	0.676	1.4612486857142855	2.020629075	-12.093246478122174	15	17	12	3UTR	MIRT052293	1	1
hsa-let-7b-5p	NM_001178093	BCAT1	TGAGGTAGTAGGTTGTGTGGTT#ACTACCAACCTAGTACA#....(((.(((((((.(((((.#)))))))))))).))).	5659	5676	1.0	-20.0	0	0.01508024	0.676	0.2990452571428572	0.34318093124999993	-12.093246478122174	15	17	12	3UTR	MIRT052293	1	1
hsa-let-7b-5p	NM_001178094	BCAT1	TGAGGTAGTAGGTTGTGTGGTT#ACTACCAACCTAGTACA#....(((.(((((((.(((((.#)))))))))))).))).	5798	5815	1.0	-20.0	0	0.01508024	0.676	0.43186830000000004	0.44584255500000003	-12.093246478122174	15	17	12	3UTR	MIRT052293	1	1
hsa-let-7b-5p	NM_001184720	GYG1	TGAGGTAGTAGGTTGTGTGGTT#GGCTCACTGCAACCTCTGCCTCC#.(((((((.(((((((((((((#))).))).)))))))))))))).	2959	2982	1.0	-25.7	1	0.001217404	0.426	0.0	0.0	-4.849714495602881	20	23	14	3UTR	MIRT052247	0	0
hsa-let-7b-5p	NM_001184720	GYG1	TGAGGTAGTAGGTTGTGTGGTT#CCTTACCTGCTACTGCCTCAA#(((((((((((...(((.((..#)).)))...))))))))))).	4923	4944	1.0	-22.3	1	0.04848624	0.529	0.0	0.0	-9.430348285984671	16	21	11	3UTR	MIRT052247	0	0
hsa-let-7b-5p	NM_001184721	GYG1	TGAGGTAGTAGGTTGTGTGGTT#GGCTCACTGCAACCTCTGCCTCC#.(((((((.(((((((((((((#))).))).)))))))))))))).	2739	2762	1.0	-25.7	1	0.001217404	0.426	0.0	0.0	-4.849714495602881	20	23	14	3UTR	MIRT052247	0	0
hsa-let-7b-5p	NM_001184721	GYG1	TGAGGTAGTAGGTTGTGTGGTT#CCTTACCTGCTACTGCCTCAA#(((((((((((...(((.((..#)).)))...))))))))))).	4703	4724	1.0	-22.3	1	0.04848624	0.529	0.0	0.0	-9.430348285984671	16	21	11	3UTR	MIRT052247	0	0
hsa-let-7b-5p	NM_001184906	FBXL20	TGAGGTAGTAGGTTGTGTGGTT#GCCATGGCACAATCTCAGTTCACTGCAACCTCTGCCTCC#.(((((((.(((((((((((..#.)))).)))))))))))))).	6613	6652	1.0	-25.3	1	0.0003000648	0.485	-0.3064808833333333	0.10612767099999999	-4.849714495602881	18	21	14	3UTR	MIRT548268	0	0
hsa-let-7b-5p	NM_004805	POLR2D	TGAGGTAGTAGGTTGTGTGGTT#TCACATAACCACACTGTTGACTACCTCAT#(((((((((.....((((((((#.)))))))).....))))))))).	744	773	1.0	-26.6	1	0.002921548	0.544	0.008931666666666659	0.07480790775000001	-13.4976292297232	17	24	9	3UTR	MIRT470676	1	1
hsa-let-7b-5p	NM_004805	POLR2D	TGAGGTAGTAGGTTGTGTGGTT#GGCTCACTGCAACCTCTGCCTTC#.(((((((.(((((((((((((#))).))).)))))))))))))).	2389	2412	1.0	-23.8	1	0.002837169	0.441	0.5265201533333334	0.04788031500000002	-4.849714495602881	20	23	14	3UTR	MIRT470676	1	1
hsa-let-7b-5p	NM_004845	PCYT1B	TGAGGTAGTAGGTTGTGTGGTT#AGCGGCTGTTCCCTCAACCTGCTACTTCT#.((((((((((((((.(.((..#.))).)))))))))))))).	1705	1734	1.0	-25.5	1	0.002060702	0.397	-0.18801207857142854	-0.05114008375	-4.026373917660731	17	20	14	3UTR	MIRT032240	1	0
hsa-let-7b-5p	NM_004996	ABCC1	TGAGGTAGTAGGTTGTGTGGTT#GACCAAATTCAGCCTACTGCCTCGG#(((((((((((((((..(((((#)))))....))))))))))))))).	5097	5122	1.0	-31.0	1	0.0009046298	0.485	0.6993385066666667	0.141253555	-4.1706235265052785	20	25	15	3UTR	MIRT032483	0	0
hsa-let-7b-5p	NM_005009	NME4	TGAGGTAGTAGGTTGTGTGGTT#AGCCACCAACTTCAGTGCCTTT#.((((((.(((((((.((((((#)))))))))))).).)))))).	733	755	1.0	-21.9	1	0.0207448	0.456	0.1972704125	-0.11675455999999998	-6.340008846841362	19	22	12	3UTR	MIRT052182	1	1
hsa-let-7b-5p	NM_005063	SCD	TGAGGTAGTAGGTTGTGTGGTT#AGACATACAGCTGCCTACCTA#..((((((..(((((((((...#.)))))))))..)))))).	1965	1986	1.0	-22.0	1	0.06898181	0.485	-0.10246068000000001	-0.09691320600000002	-7.255896845946231	15	19	9	3UTR	MIRT032312	1	1
hsa-let-7b-5p	NM_005151	USP14	TGAGGTAGTAGGTTGTGTGGTT#ACTGCACACCTATTACCTA#..((((((((((.((((((((.#)))))))))))))))))).	1980	1999	1.0	-25.0	1	0.1551819	0.603	1.3584867800000002	1.8938015912500004	-6.246131332038532	18	19	18	3UTR	MIRT052341	0	0
hsa-let-7b-5p	NM_005219	DIAPH1	TGAGGTAGTAGGTTGTGTGGTT#ACCACCCTGACCCTGTCTTTCTCTCTGGCCTGCTGCTCTCT#.((((((((((((((.(((((.#))))))....................)))))))))).))).	4012	4053	1.0	-21.3	1	0.04138898	0.441	2.034553134285714	1.9524737392499998	-4.026373917660731	19	41	10	3UTR	MIRT032344	0	0
hsa-let-7b-5p	NM_005348	HSP90AA1	TGAGGTAGTAGGTTGTGTGGTT#ATGGCATGACAACTACTTTAA#(((((((((..(((((((.((.#)).))))))).))))))))).	2362	2383	1.0	-18.0	1	0.03239939	0.691	4.991919111111112	3.7833334999999995	-8.004855389940193	18	21	9	3UTR	MIRT052238	0	0
hsa-let-7b-5p	NM_005415	SLC20A1	TGAGGTAGTAGGTTGTGTGGTT#TCACCAGCTTCTGCCCTCAC#((((((((.((((((.((((..#))))))))))))))).))).	2890	2910	1.0	-19.5	1	0.0002059842	0.574	1.4647549999999998	0.8414493387499999	-5.227013184751041	18	20	15	3UTR	MIRT297441	1	1
hsa-let-7b-5p	NM_005504	BCAT1	TGAGGTAGTAGGTTGTGTGGTT#ACTACCAACCTAGTACA#....(((.(((((((.(((((.#)))))))))))).))).	5713	5730	1.0	-20.0	0	0.01508024	0.676	0.2658389	0.08846454999999996	-12.093246478122174	15	17	12	3UTR	MIRT052293	1	1
hsa-let-7b-5p	NM_005724	TSPAN3	TGAGGTAGTAGGTTGTGTGGTT#ACCTACTTACCTACTACCTG#..(((((((((((.(((.(((.#))))))..))))))))))).	1063	1083	1.0	-23.1	1	0.5483958	0.544	-0.1317870909090909	-0.18949007125	-5.813840636892696	17	20	11	3UTR	MIRT052340	0	0
hsa-let-7b-5p	NM_005724	TSPAN3	TGAGGTAGTAGGTTGTGTGGTT#ACACGAGCCTGCTTCTGTTACCTCC#.(((((((((((((((((....#)))).))))))))......))))).	1203	1228	1.0	-20.4	1	1.867907e-07	0.529	-0.09949752541666666	-0.1744533305	-3.793324837357118	17	25	8	3UTR	MIRT052340	0	0
hsa-let-7b-5p	NM_005744	ARIH1	TGAGGTAGTAGGTTGTGTGGTT#ACCACAACAACCTTATTACCA#...((((((((((((((((((.#)))))).)))))).)))))).	6758	6779	1.0	-24.2	0	0.1655244	0.603	-0.137117965	-0.012757687499999983	-6.514540193678739	18	21	6	3UTR	MIRT559500	0	0
hsa-let-7b-5p	NM_005744	ARIH1	TGAGGTAGTAGGTTGTGTGGTT#AGCTCACTACAACCTCTGCCTTC#.(((((((.(((((((((((((#))).))).)))))))))))))).	16717	16740	1.0	-24.3	1	9.764342e-05	0.441	-0.0013703333333333493	-0.09273607499999997	-4.849714495602881	20	23	14	3UTR	MIRT559500	0	0
hsa-let-7b-5p	NM_005744	ARIH1	TGAGGTAGTAGGTTGTGTGGTT#AGCTCAAGCGATCTGCCTGCCTCAG#((((((((((((((((.(((((#))).)).))))))))).))))))).	16877	16902	1.0	-23.9	1	0.001304543	0.471	-0.026556235294117648	-0.03768727499999999	-3.937574446201665	21	25	9	3UTR	MIRT559500	0	0
hsa-let-7b-5p	NM_005885	MARCHF6	TGAGGTAGTAGGTTGTGTGGTT#TACATTTCCTACTGCCTGAT#(.((((((((((..(((((...#)))))..)))))))))).).	3534	3554	1.0	-22.5	1	0.1182599	0.676	3.3603229999999997	2.398140446375	-7.247220858403485	16	20	10	3UTR	MIRT052052	0	0
hsa-let-7b-5p	NM_005885	MARCHF6	TGAGGTAGTAGGTTGTGTGGTT#AATCGCTGTTTCTCCTGAGCTTGCTGCCTCT#.(((((((((((((..((((((#))))))...........))))))))))))).	8863	8894	1.0	-22.1	1	0.0009646992	0.515	0.23669575384615388	-0.06680241875000001	-4.761823477911366	19	31	13	3UTR	MIRT052052	0	0
hsa-let-7b-5p	NM_006087	TUBB4A	TGAGGTAGTAGGTTGTGTGGTT#ACCGCTGACCTTGCCTCAC#(((((((..((((((.(((((.#)))))))))))))))))).	1841	1860	1.0	-21.4	1	0.03819021	0.368	0.0	0.0	-7.540648113931671	18	19	18	3UTR	MIRT735613	0	0
hsa-let-7b-5p	NM_006162	NFATC1	TGAGGTAGTAGGTTGTGTGGTT#ACGTACACTCCTGCTGCCTTAC#((((((((((((..(((((((.#)).))))).)))))))))))).	3370	3392	1.0	-24.3	1	0.02008925	0.515	0.8859951041666668	0.2482765888750001	-6.083544976388314	19	22	12	3UTR	MIRT052157	0	0
hsa-let-7b-5p	NM_006268	DPF2	TGAGGTAGTAGGTTGTGTGGTT#GCCGCATAGCCTCACCTCT#.(((((.(.((((((((((((.#)))))))))))))))))).	1683	1702	1.0	-26.3	0	0.04996644	0.382	0.7121694166666668	0.11562879374999999	-6.3934010304742	18	19	18	3UTR	MIRT032431	1	0
hsa-let-7b-5p	NM_006268	DPF2	TGAGGTAGTAGGTTGTGTGGTT#GGCCACCCACCTGCTCCCCGA#((.((.(((((((.(.((((((#))))))).))))))))).)).	1214	1235	1.0	-20.8	0	0.3407898	0.456	-0.4376250714285715	2.2997880187499993	-8.485961679525179	18	21	9	3UTR	MIRT032431	1	0
hsa-let-7b-5p	NM_006369	LRRC41	TGAGGTAGTAGGTTGTGTGGTT#CCAGGCAGCCTGGAGTACCTCAT#(((((((.((((((((.(((..#))).))))))))...))))))).	3387	3410	1.0	-26.5	1	0.0005730186	0.368	2.7884352000000003	3.0757175274999993	-6.251209375382295	18	23	8	3UTR	MIRT052252	0	0
hsa-let-7b-5p	NM_006369	LRRC41	TGAGGTAGTAGGTTGTGTGGTT#ACCACACAGCTGCTCAGTGCCTTC#.((((((...(((((((((((.#)))))))))))......)))))).	3713	3737	1.0	-23.5	1	0.002811815	0.441	2.3069656363636364	2.1863935625	-8.40585589311169	17	24	11	3UTR	MIRT052252	0	0
hsa-let-7b-5p	NM_006369	LRRC41	TGAGGTAGTAGGTTGTGTGGTT#ACCACACTGCTCTCAGGCCTCAA#((((((.(..(((.(((((((.#))))))).)))..)..)))))).	3102	3125	1.0	-22.8	0	0.01334438	0.559	2.8634745142857136	2.4743551362500007	-8.636997025167332	17	23	7	3UTR	MIRT052252	0	0
hsa-let-7b-5p	NM_006547	IGF2BP3	TGAGGTAGTAGGTTGTGTGGTT#GACCAGGCAACTTTTGAACTCCTG#..(((.((((((((((.(((((#))))).)))))))....)))))).	2250	2274	1.0	-19.8	0	0.03269938	0.574	5.700130714285714	5.359522628750001	-6.857959480565336	18	24	7	3UTR	MIRT032297	1	1
hsa-let-7b-5p	NM_006598	SLC12A7	TGAGGTAGTAGGTTGTGTGGTT#CCCACAGCCTCTGCCTG#..((((((.((((((((.((..#)))))))))))))))).	4905	4922	1.0	-24.5	1	7.201129e-05	0.441	1.6794224962500002	3.174377061875001	-6.013390377618052	16	17	16	3UTR	MIRT497878	0	0
hsa-let-7b-5p	NM_006612	KIF1C	TGAGGTAGTAGGTTGTGTGGTT#CCACCCGCCTCTGCCTCC#.(((((((.((((.(.((((..#))))).))))))))))).	6886	6904	1.0	-23.1	1	0.001345164	0.441	0.004189142857142868	0.080305075	-5.9396034934269	16	18	11	3UTR	MIRT051959	0	0
hsa-let-7b-5p	NM_006621	AHCYL1	TGAGGTAGTAGGTTGTGTGGTT#GCCATGCACCCTGCTTCCCAG#((.((.((((((.((((((((.#)))))))).)))))).)))).	3206	3227	1.0	-22.9	0	0.001716918	0.5	0.7704331249999999	0.8915476775	-8.685203294367403	18	21	8	3UTR	MIRT052133	0	0
hsa-let-7b-5p	NM_006628	ARPP19	TGAGGTAGTAGGTTGTGTGGTT#GCGATCTTGGCTCACTGCAACCTCTGCCTCC#.(((((((.(((((((((((((#.))).))).)))))))))))))).	3967	3998	1.0	-25.9	1	0.001671981	0.397	0.9743146800000002	1.3580042799999998	-4.849714495602881	20	24	14	3UTR	MIRT051971	1	1
hsa-let-7b-5p	NM_006763	BTG2	TGAGGTAGTAGGTTGTGTGGTT#AACCACATGAAAGTCTTGATGCTGCTGCCA#...((((((((.((((((((((#))))))))))...........)))))))).	1431	1461	1.0	-20.2	0	0.005245737	0.529	0.9155128400000004	1.12837246	-9.861343503275094	18	30	10	3UTR	MIRT052067	1	1
hsa-let-7b-5p	NM_006784	WDR3	TGAGGTAGTAGGTTGTGTGGTT#AACCACAGCCGCAGACCTCAA#((((((....(((..(((((((#))))))))))....)))))).	3940	3961	1.0	-21.4	0	0.03515469	0.5	-0.17012828571428568	-0.005285749999999999	-11.686081514598598	16	21	10	3UTR	MIRT052227	0	0
hsa-let-7b-5p	NM_007124	UTRN	TGAGGTAGTAGGTTGTGTGGTT#AGCCATGACCACCTTTCTACCTCAG#((((((((.((((.((((((((#)))))).)).))))..)))))))).	12464	12489	1.0	-24.7	1	0.06368065	0.618	0.0	0.0	-5.850804021967834	20	25	8	3UTR	MIRT052224	1	1
hsa-let-7b-5p	NM_007124	UTRN	TGAGGTAGTAGGTTGTGTGGTT#AGCCATATAACCAACTAGATCC#.((..((((.((((((((((((#)))))))))))).))))..)).	11388	11410	1.0	-21.6	0	0.1305449	0.632	-0.21715316666666662	0.17841969999999996	-12.186890755456961	18	22	12	3UTR	MIRT052224	1	1
hsa-let-7b-5p	NM_007188	ABCB8	TGAGGTAGTAGGTTGTGTGGTT#CCACACCCTTGCTAGGACCTCAC#((((((((((((..((((((..#)))))).))))))...)))))).	2667	2690	1.0	-22.3	1	0.00287606	0.426	-0.08513397333333338	-0.3675174662499999	-6.083544976388314	18	23	6	3UTR	MIRT051898	0	0
hsa-let-7b-5p	NM_007192	SUPT16H	TGAGGTAGTAGGTTGTGTGGTT#AACCTACCCTACTGCCA#...(((((((((..(((.((((#)))))))))))))))).	3650	3667	1.0	-19.8	0	0.3334177	0.529	4.75289888888889	5.466293055	-8.66051072386539	16	17	16	3UTR	MIRT052127	0	0
hsa-let-7b-5p	NM_012204	GTF3C4	TGAGGTAGTAGGTTGTGTGGTT#AGCTGCAGTCAGCCGAGGTGGCACCACTGCACTTCAGCCTGGGCAAGACTGGAGACTGCCTCAA#(((((((((((((((((((((.#.)))))))...)))))..............))))))))).	4037	4101	1.0	-23.3	1	0.00535938	0.603	0.002836078947368446	-0.04531320974999998	-3.937574446201665	21	40	9	3UTR	MIRT032467	0	0
hsa-let-7b-5p	NM_012316	KPNA6	TGAGGTAGTAGGTTGTGTGGTT#CCAGGAAGGCAGGGGGCAGAATCTTTTTTTCACTTGGCCTGCTACCTCC#.(((((((((((((..((((..#.))))..))))))))))))).	3890	3939	1.0	-26.7	1	0.05150348	0.618	0.405758176923077	0.09381247500000002	-4.761823477911366	17	21	13	3UTR	MIRT052349	0	0
hsa-let-7b-5p	NM_012333	MYCBP	TGAGGTAGTAGGTTGTGTGGTT#GACTTCACATCTTGCCTATCTCAC#((((((((((((.((((.((((#)))).)))).))))).))))))).	2466	2490	1.0	-21.2	1	0.1268918	0.706	2.1527774615384616	2.544542675	-5.226705058867908	20	24	7	3UTR	MIRT032374	1	1
hsa-let-7b-5p	NM_013261	PPARGC1A	TGAGGTAGTAGGTTGTGTGGTT#ATGATACACCTACTACTCAA#(((.((((((((.(((((.((.#)).)))))))))))))))).	4732	4752	1.0	-20.3	0	0.2148888	0.588	3.6699374999999996	3.7631325249999996	-8.258727333827098	18	20	16	3UTR	MIRT051970	1	0
hsa-let-7b-5p	NM_013274	POLL	TGAGGTAGTAGGTTGTGTGGTT#GCCACCCCTTCTACCTCAC#((((((((.(((..(.(((((.#))))))))).)))))))).	2370	2389	1.0	-22.0	1	0.5624019	0.426	0.25582849999999996	0.4015909039999999	-7.37298371493769	17	19	9	3UTR	MIRT735605	0	1
hsa-let-7b-5p	NM_013282	UHRF1	TGAGGTAGTAGGTTGTGTGGTT#ACCAAAGTTTGCAGCCTATACCTCAA#((((((.((((((((((((((.#)))).....)))))))))))))))).	4029	4055	1.0	-23.2	0	0.1312717	0.706	2.866267721052631	0.8605404987499998	-5.4812609810729835	20	26	16	3UTR	MIRT001580	0	0
hsa-let-7b-5p	NM_013283	MAT2B	TGAGGTAGTAGGTTGTGTGGTT#AACTTCTACAGCTTGATGCCTCC#.((((((.(((((((((.((((#))))..))))))))).)))))).	1603	1626	1.0	-19.9	1	0.007550844	0.603	1.0020006555555558	1.206354375	-6.106959766537749	19	23	9	3UTR	MIRT032407	0	0
hsa-let-7b-5p	NM_013346	SNX12	TGAGGTAGTAGGTTGTGTGGTT#AACCACACAGTCTCTGACTTCT#.(((((((.(((((((((((((#)))))))))))))))).)))).	1501	1523	1.0	-22.1	1	0.03042484	0.515	1.6394870769230765	0.8475757824999999	-4.849714495602881	20	22	16	3UTR	MIRT052243	0	0
hsa-let-7b-5p	NM_013390	CEMIP2	TGAGGTAGTAGGTTGTGTGGTT#GACTTTACAAAATATGCTACCTCAA#((((((((((..(((((.((((#)))).)))))....)))))))))).	5774	5799	1.0	-22.1	1	0.1326827	0.603	1.57740766	2.3227735037499997	-10.10915223120837	19	25	10	3UTR	MIRT001585	1	1
hsa-let-7b-5p	NM_013410	AK4	TGAGGTAGTAGGTTGTGTGGTT#TATTCCTGCTGCCTTAA#((((((((((((..(((.....#))).)))))))))))).	2267	2284	1.0	-18.7	1	0.1383982	0.618	2.1244885833333336	0.22322806	-6.083544976388314	15	17	12	3UTR	MIRT508935	0	0
hsa-let-7b-5p	NM_013448	BAZ1A	TGAGGTAGTAGGTTGTGTGGTT#GACCACATGAAAGTGTGGCCTGCACTATATTCTCAA#((((((((((((((((((((((#))))))))........)))))))....))).)))).	5045	5081	1.0	-19.4	1	0.1603787	0.647	3.463664714285715	3.938534918125	-3.937574446201665	22	36	8	3UTR	MIRT032364	0	0
hsa-let-7b-5p	NM_013942	PAX3	TGAGGTAGTAGGTTGTGTGGTT#CCACATTGGCTGCCTTAT#(((((((((.....((((((..#))))))..))))))))).	1055	1073	1.0	-19.6	1	0.01487349	0.534	0.8329626666666666	1.5041413032954545	-13.4976292297232	15	18	9	3UTR	MIRT052081	1	1
hsa-let-7b-5p	NM_014001	GGA3	TGAGGTAGTAGGTTGTGTGGTT#GCCACTCTACATCCTACTGCTTTG#.(((((((((((.((((((((.#)))))...))).))))))))))).	2954	2978	1.0	-24.2	1	0.08280857	0.441	3.170608090909091	3.2723667649999997	-5.08245545002336	19	24	11	3UTR	MIRT499496	0	1
hsa-let-7b-5p	NM_014001	GGA3	TGAGGTAGTAGGTTGTGTGGTT#ACCAGACCCTATTGCTTCAA#((((((((((((..((.((((.#)))).)))))))))))))).	3180	3200	1.0	-22.9	1	0.1266251	0.412	4.02704275	3.467130225	-6.083544976388314	18	20	14	3UTR	MIRT499496	0	1
hsa-let-7b-5p	NM_001489	NR6A1	TGAGGTAGTAGGTTGTGTGGTT#AGCCACGGTGGCCCTGCCTCT#.(((((((..((((.(((((((#)))))))..))))))))))).	6040	6061	1.0	-23.0	1	0.0001941278	0.368	0.0	0.0	-6.827670524181695	18	21	11	3UTR	MIRT471967	1	1
hsa-let-7b-5p	NM_001542	IGSF3	TGAGGTAGTAGGTTGTGTGGTT#TCACAGAGACAGACTGCCTCT#.((((((((..(((.(((((..#)))))..)))..)))))))).	4559	4580	1.0	-21.5	1	5.910504e-07	0.5	0.0	0.0	-8.596055341346283	16	21	8	3UTR	MIRT032291	0	0
hsa-let-7b-5p	NM_001621	AHR	TGAGGTAGTAGGTTGTGTGGTT#GGCTCACTGCAACCTCTACCTCC#.(((((((.(((((((((((((#))).))).)))))))))))))).	4794	4817	1.0	-25.7	1	0.0003565984	0.456	0.0	0.0	-4.849714495602881	20	23	14	3UTR	MIRT482187	0	0
hsa-let-7b-5p	NM_001626	AKT2	TGAGGTAGTAGGTTGTGTGGTT#ACCATGGTGATGCAGGTCTCGTAGTGTGGGCACAGGCCTGGCTACCTCAT#((((((((((((((((((....#.)))))).)))).)))))))).	4269	4319	1.0	-25.1	1	0.005878531	0.441	-0.13390544999999995	0.29973234249999997	-3.937574446201665	18	22	8	3UTR	MIRT437977	1	0
hsa-let-7b-5p	NM_001652	AQP6	TGAGGTAGTAGGTTGTGTGGTT#GGCTCACTGCAACCTCTACCTCC#.(((((((.(((((((((((((#))).))).)))))))))))))).	1708	1731	1.0	-25.7	1	0.00422406	0.412	0.0	0.0	-4.849714495602881	20	23	14	3UTR	MIRT760981	0	0
hsa-let-7b-5p	NM_001759	CCND2	TGAGGTAGTAGGTTGTGTGGTT#GCCTGCAGCCTACTTTGGGGAAATAAAGTGCCTTAC#(((((((((((((((((.(((.#))))))))))))))...............)))))).	5849	5885	1.0	-21.8	1	0.03224674	0.544	0.0	0.0	-3.937574446201665	20	36	14	3UTR	MIRT003835	1	1
hsa-let-7b-5p	NM_001761	CCNF	TGAGGTAGTAGGTTGTGTGGTT#GGCCTCTCCCTGGGAACGGGCTGACCACAACACACCCTGCTGCCATCC#.(((((((((((.(((((((((#.))))))).))...))))))))).)).	3520	3568	1.0	-25.6	1	0.1684273	0.5	0.0	0.0	-5.08245545002336	20	27	9	3UTR	MIRT005061	1	0
hsa-let-7b-5p	NM_001850	COL8A1	TGAGGTAGTAGGTTGTGTGGTT#AGCACGATCTTGGCTTACTGCAACCTCTACCTCC#.(((((((.(((((((((((((#.)))).)).)))))))))))))).	3690	3724	1.0	-23.6	1	0.003749856	0.485	-0.6812252666666666	-1.2510334025000003	-4.849714495602881	20	24	14	3UTR	MIRT461367	0	0
hsa-let-7b-5p	NM_001866	COX7B	TGAGGTAGTAGGTTGTGTGGTT#GGCTGGAGTGCAGTGGCACCATCTCAGCTCACTGCGACCTCTGCCTCC#.(((((((.(((((((((((((#.))).))).)))))))))))))).	602	650	1.0	-25.8	1	0.0005319471	0.426	-0.43378392	0.8854533775000002	-4.849714495602881	20	24	14	3UTR	MIRT032325	0	0
hsa-let-7b-5p	NM_001866	COX7B	TGAGGTAGTAGGTTGTGTGGTT#GACACACTGCAACCTTTGCCTCC#.(((((((.(((((((((((((#))).))).)))))))))))))).	1764	1787	1.0	-23.6	1	0.007992297	0.471	0.0	0.0	-4.849714495602881	20	23	14	3UTR	MIRT032325	0	0
hsa-let-7b-5p	NM_001913	CUX1	TGAGGTAGTAGGTTGTGTGGTT#GCCCGCAGCCTGACCTCT#.(((((..(((((((((.(((.#))))))))))))))))).	2331	2349	1.0	-23.7	0	4.788886e-05	0.324	0.0	0.0	-7.650646301409068	17	18	17	3UTR	MIRT052342	0	1
hsa-let-7b-5p	NM_001943	DSG2	TGAGGTAGTAGGTTGTGTGGTT#GACCACACTGTCTCTGCTTCC#.(((((((.(((..((((((((#))))))))..)))))))))).	3581	3602	1.0	-23.0	1	0.02610184	0.603	0.0	0.0	-6.9956850257895296	18	21	10	3UTR	MIRT032265	0	0
hsa-let-7b-5p	NM_001955	EDN1	TGAGGTAGTAGGTTGTGTGGTT#CCACATTTAATTATTGCCTCC#.((((((((((...((((((..#))))))....)))))))))).	1516	1537	1.0	-21.1	1	0.2126264	0.5	2.0621755	2.1772131624999997	-9.286098677140124	16	21	10	3UTR	MIRT244066	1	1
hsa-let-7b-5p	NM_001983	ERCC1	TGAGGTAGTAGGTTGTGTGGTT#CCACAGGCCCTGCTGCCTCT#.(((((((((((.(.(((((..#))))).).))))))))))).	2053	2073	1.0	-29.2	1	2.58192e-05	0.471	0.0	0.0	-5.8179050102739955	17	20	11	3UTR	MIRT052171	0	0
hsa-let-7b-5p	NM_002022	FMO4	TGAGGTAGTAGGTTGTGTGGTT#CCAATGCATCTTCTACCCTGCTACCTCAG#((((((((((((....((((..#.)))))))))))))))).	2238	2267	1.0	-23.0	1	0.09069591	0.647	0.0	0.0	-7.052043616942562	16	18	16	3UTR	MIRT617854	0	1
hsa-let-7b-5p	NM_002213	ITGB5	TGAGGTAGTAGGTTGTGTGGTT#ACTACATAGAACCTATTACCTGGG#(.(((((((((((((((((((.#))))))))..))))))))))).).	4230	4254	1.0	-24.5	1	0.001546131	0.588	0.0	0.0	-5.101250328216836	20	24	11	3UTR	MIRT051994	0	0
hsa-let-7b-5p	NM_002357	MXD1	TGAGGTAGTAGGTTGTGTGGTT#ACCACAGCCTGAAGCTCCCCCAGCGCCTGCACCTCG#.(((((.((((((..((.((..#.))))..))))))))))).	2460	2496	1.0	-22.0	0	0.000436871	0.412	0.0	0.0	-6.9293008499994775	15	19	11	3UTR	MIRT303317	1	1
hsa-let-7b-5p	NM_002357	MXD1	TGAGGTAGTAGGTTGTGTGGTT#CCACCAGCCTGACTGCTA#...((((((((((((.((((..#))))))))))).))))).	3543	3561	1.0	-22.1	0	0.001056335	0.574	0.0	0.0	-6.747589273982352	16	18	11	3UTR	MIRT303317	1	1
hsa-let-7b-5p	NM_002375	MAP4	TGAGGTAGTAGGTTGTGTGGTT#AACAGCACAGGCCCAGAGTACCTGCTGCCTCC#.((((((((((((..((.((((#.))))))....)))))))))))).	5521	5553	1.0	-25.9	1	0.01962207	0.368	0.0	0.0	-5.3856143151281595	18	24	12	3UTR	MIRT052234	0	0
hsa-let-7b-5p	NM_002393	MDM4	TGAGGTAGTAGGTTGTGTGGTT#GGCTCACTGCAACCTCTGCCTCC#.(((((((.(((((((((((((#))).))).)))))))))))))).	4874	4897	1.0	-25.7	1	0.002907259	0.412	0.0	0.0	-4.849714495602881	20	23	14	3UTR	MIRT052186	1	1
hsa-let-7b-5p	NM_002393	MDM4	TGAGGTAGTAGGTTGTGTGGTT#GCTCACCGCAACCTCTGCCTCC#.(((((((.((((((((((((.#)).))).)))))))))))))).	4322	4344	1.0	-25.3	1	0.002025972	0.397	0.0	0.0	-4.849714495602881	19	22	14	3UTR	MIRT052186	1	1
hsa-let-7b-5p	NM_002393	MDM4	TGAGGTAGTAGGTTGTGTGGTT#AGCCTCAAGCAACCCTCCTGCCTCAG#((((((((..((((((..((((#))))....))))))...)))))))).	3203	3229	1.0	-23.7	1	0.02563289	0.456	0.0	0.0	-6.236470572775607	18	26	8	3UTR	MIRT052186	1	1
hsa-let-7b-5p	NM_002524	NRAS	TGAGGTAGTAGGTTGTGTGGTT#TCACAGAGAAGCTCCTGCTACTTCC#.(((((((((((((.(((((..#))))).)).....))))))))))).	807	832	1.0	-21.1	1	0.00268181	0.544	3.7610501111111114	3.40056889875	-4.528774397607753	18	25	11	3UTR	MIRT003836	1	1
hsa-let-7b-5p	NM_002524	NRAS	TGAGGTAGTAGGTTGTGTGGTT#CATAGGTTACTACCTA#..(((((((((.(((((.....#))))).))))))))).	1618	1634	1.0	-18.0	1	0.0001062394	0.676	-0.26450047666666676	-0.16096567062500006	-8.303804028968646	14	16	9	3UTR	MIRT003836	1	1
hsa-let-7b-5p	NM_002610	PDK1	TGAGGTAGTAGGTTGTGTGGTT#AGCATGATCTTGGCTCACTGCAACCTCTGCCTCC#.(((((((.(((((((((((((#.))).))).)))))))))))))).	9542	9576	1.0	-25.9	1	0.009397013	0.485	0.0	0.0	-4.849714495602881	20	24	14	3UTR	MIRT032356	0	0
hsa-let-7b-5p	NM_002657	PLAGL2	TGAGGTAGTAGGTTGTGTGGTT#GACTGCATTTGTTCCTGCCTGCCTCGG#((((((((((((..((((((((#)))))))).....))))).))))))).	2561	2588	1.0	-23.5	1	0.003399048	0.456	-0.06538227692307691	0.5470256600000001	-6.083544976388314	20	27	8	3UTR	MIRT005038	1	1
hsa-let-7b-5p	NM_002661	PLCG2	TGAGGTAGTAGGTTGTGTGGTT#ACCACCGGCTGCCTGCTGCA#....(((((((((.(((((((.#)))))..)).))))))))).	4509	4529	1.0	-21.8	0	9.166135e-06	0.515	0.0	0.0	-10.403402386158335	16	20	9	3UTR	MIRT499408	0	1
hsa-let-7b-5p	NM_002813	PSMD9	TGAGGTAGTAGGTTGTGTGGTT#TCACATTCTCCTAAAATGACAGCAGCAGAGAGCCTTCTGCCTCAG#((((((((.(((((.(.((.(.#.).)).).))))).)))))))).	2376	2421	1.0	-24.0	1	7.49533e-07	0.426	0.0	0.0	-5.729413664698063	17	23	8	3UTR	MIRT032262	0	0
hsa-let-7b-5p	NM_002881	RALB	TGAGGTAGTAGGTTGTGTGGTT#GCCAGACCTTCTGCTACCTCT#.(((((((((((..((.((((.#)))).))..))))))))))).	1787	1808	1.0	-25.6	1	0.0125947	0.574	3.335482972727272	5.462246973750001	-5.9392953675437665	17	21	11	3UTR	MIRT052235	1	1
hsa-let-7b-5p	NM_003074	SMARCC1	TGAGGTAGTAGGTTGTGTGGTT#CCGCTCCTTCCCTAGGCCTGCTGGCTCT#.(((.(((((((((..(.((..#.)))..))))))))).))).	4135	4163	1.0	-21.6	0	2.1824e-06	0.5	2.7834850666666666	1.4714795837499999	-8.880860652723838	15	20	9	3UTR	MIRT032311	1	1
hsa-let-7b-5p	NM_003113	SP100	TGAGGTAGTAGGTTGTGTGGTT#AGCCACTAACCTTTGCCTGGT#(.((((((.((((((.((((((#)))))))))))))))))).).	2926	2947	1.0	-21.7	1	4.820779e-05	0.515	1.4528670000000001	1.5863730887500003	-6.390689066766211	19	21	18	3UTR	MIRT032264	0	0
hsa-let-7b-5p	NM_003123	SPN	TGAGGTAGTAGGTTGTGTGGTT#AGCCACTGCACCCAGCCACTGCTTCAT#(((((((((.((((((((((((#)))))).)))....)))))))))))).	4713	4740	1.0	-22.9	1	0.001209846	0.426	0.0	0.0	-5.180080914529843	21	27	12	3UTR	MIRT052328	0	0
hsa-let-7b-5p	NM_003156	STIM1	TGAGGTAGTAGGTTGTGTGGTT#GACCACCATGGCCTGCCTGCCCTGCCTCC#.(((((((((((((((((((((#)))))).)))))))))......)))))).	2847	2876	1.0	-25.0	1	0.02959893	0.412	2.1611674285714284	2.1252941522499995	-3.793324837357118	21	29	9	3UTR	MIRT032252	0	0
hsa-let-7b-5p	NM_003246	THBS1	TGAGGTAGTAGGTTGTGTGGTT#GACACAATCTCGGCTCACTGCAACCTCTGCCTCC#.(((((((.(((((((((((((#.))).))).)))))))))))))).	7302	7336	1.0	-26.0	1	0.004866994	0.412	0.0	0.0	-4.849714495602881	20	24	14	3UTR	MIRT001586	1	1
hsa-let-7b-5p	NM_003290	TPM4	TGAGGTAGTAGGTTGTGTGGTT#CCACCACCCTACTCCTA#..(((.((((((.((.((((..#)))))).))))))))).	2313	2330	1.0	-20.1	0	0.6352166	0.485	0.0	0.0	-8.380139173535193	15	17	9	3UTR	MIRT052131	0	0
hsa-let-7b-5p	NM_003334	UBA1	TGAGGTAGTAGGTTGTGTGGTT#GCCACTGCCTTCTACCTTG#.(((((((.((((...(((((.#))))).)))).))))))).	3514	3533	1.0	-21.9	1	0.2559023	0.559	0.0	0.0	-6.675053053677535	16	19	7	3UTR	MIRT051972	0	0
hsa-let-7b-5p	NM_003339	UBE2D2	TGAGGTAGTAGGTTGTGTGGTT#ACCCACATCCTGCATTTTAA#((((((.(((((.((((.(((.#))))))).))))))))))).	1411	1431	1.0	-18.4	0	0.2917633	0.647	2.829242166666667	2.9107793775	-6.770391593739227	18	20	11	3UTR	MIRT032280	0	0
hsa-let-7b-5p	NM_003373	VCL	TGAGGTAGTAGGTTGTGTGGTT#GGCTGCAGTGCAGTGGTGCAATCTCAGCTCACTGCAACCTCTGCCTCC#.(((((((.(((((((((((((#.))).))).)))))))))))))).	5685	5733	1.0	-26.1	1	0.001904102	0.412	0.0	0.0	-4.849714495602881	20	24	14	3UTR	MIRT464268	0	0
hsa-let-7b-5p	NM_003406	YWHAZ	TGAGGTAGTAGGTTGTGTGGTT#GGCCGCATGATCTTTCTGGCTCC#.(((.(((.(((((((((((((#)))))))))))))..))).))).	2406	2429	1.0	-22.7	0	0.02389094	0.5	0.0	0.0	-8.968751670415353	19	23	13	3UTR	MIRT052271	0	0
hsa-let-7b-5p	NM_003417	ZNF264	TGAGGTAGTAGGTTGTGTGGTT#GGCTCACAGCAGCCTCTGCCTCC#.(((((((.(((((((((((((#))).)))).))))))))))))).	10436	10459	1.0	-26.1	1	0.000354816	0.368	0.0	0.0	-4.849714495602881	20	23	13	3UTR	MIRT294443	0	0
hsa-let-7b-5p	NM_003417	ZNF264	TGAGGTAGTAGGTTGTGTGGTT#GGCTCAAGCAACCTGCTTGCCTGGG#(.((((((((((((((.(((((#))).)).)))))))))).)))).).	3898	3923	1.0	-22.9	1	0.0001237656	0.426	0.0	0.0	-5.101250328216836	20	25	10	3UTR	MIRT294443	0	0
hsa-let-7b-5p	NM_003582	DYRK3	TGAGGTAGTAGGTTGTGTGGTT#CCACACAATCTCTGATGTCTTCT#.(((((((.(((((((((((..#))))))))))))))....)))).	6565	6588	1.0	-20.3	1	0.01824846	0.632	0.0	0.0	-4.849714495602881	18	23	14	3UTR	MIRT735595	0	0
hsa-let-7b-5p	NM_003591	CUL2	TGAGGTAGTAGGTTGTGTGGTT#ACCACACCCCTCCTCCCTCAA#(((((.((.(((..(((((((.#))))))).))).)).))))).	3621	3642	1.0	-22.6	0	0.9903817	0.603	1.9401014285714289	1.90987801475	-9.040893395827124	17	21	7	3UTR	MIRT052315	0	0
hsa-let-7b-5p	NM_003600	AURKA	TGAGGTAGTAGGTTGTGTGGTT#GCCATATAACCTGACAGGAACATGCTACTG#...((((((((((((((((((.#))))))))))))...........)))))).	1526	1556	1.0	-20.9	0	0.03439491	0.529	2.5335157517241376	2.1740818925000003	-6.514540193678739	18	30	12	3UTR	MIRT005051	0	0
hsa-let-7b-5p	NM_003729	RTCA	TGAGGTAGTAGGTTGTGTGGTT#TCAAGCAATTCTACTGCCTCAG#((((((((((((((((.(((..#))).))))).))))))))))).	1781	1803	1.0	-23.7	1	0.004876229	0.485	1.1738389999999999	1.07374337375	-3.937574446201665	19	22	11	3UTR	MIRT032266	1	0
hsa-let-7b-5p	NM_003745	SOCS1	TGAGGTAGTAGGTTGTGTGGTT#AACTCGCACCTCCTACCTCTTCAT#(((((..(((((..((((((((#))).)))))..)))))..))))).	1073	1097	1.0	-22.4	0	0.268854	0.529	1.0306415111111111	1.00270023125	-9.528190272452681	18	24	5	3UTR	MIRT492219	1	1
hsa-let-7b-5p	NM_003825	SNAP23	TGAGGTAGTAGGTTGTGTGGTT#ACCACATGAATTCAGATTTACCTCAA#((((((((....(((((((((.#)))))))))........)))))))).	1916	1942	1.0	-19.0	1	0.01454127	0.706	0.0	0.0	-12.408048357782313	17	26	9	3UTR	MIRT001590	1	1
hsa-let-7b-5p	NM_003927	MBD2	TGAGGTAGTAGGTTGTGTGGTT#CCCACGATCACTGCCTTC#.((((((((.(((((((.((..#))))))))))))))))).	3516	3534	1.0	-22.0	1	0.3003521	0.426	0.0	0.0	-5.035831305685297	17	18	17	3UTR	MIRT501940	1	1
hsa-let-7b-5p	NM_004040	RHOB	TGAGGTAGTAGGTTGTGTGGTT#GACCACACTTGTACGCTGTAACCTCATCTACTTCT#.(((((((.(((((((((((((#))))))))...........)))))...))))))).	1905	1940	1.0	-22.7	1	0.02473625	0.662	0.0	0.0	-4.849714495602881	20	35	8	3UTR	MIRT001599	0	0
hsa-let-7b-5p	NM_004060	CCNG1	TGAGGTAGTAGGTTGTGTGGTT#GACATTTGTATCTACGATAAAAATTTTTATACAGAACCTACTGCCTCAA#((((((((((((((.((((...#.)))).)))))))))))))).	1773	1822	1.0	-29.8	1	0.1233343	0.676	3.8626797642857147	2.7775335300000004	-4.6730240064523	18	21	14	3UTR	MIRT052358	0	0
hsa-let-7b-5p	NM_004091	E2F2	TGAGGTAGTAGGTTGTGTGGTT#GGCTCACTGCAACCTCTGCCTCC#.(((((((.(((((((((((((#))).))).)))))))))))))).	4169	4192	1.0	-25.7	1	0.0008698785	0.397	0.0	0.0	-4.849714495602881	20	23	14	3UTR	MIRT735481	1	1
hsa-let-7b-5p	NM_004130	GYG1	TGAGGTAGTAGGTTGTGTGGTT#GGCTCACTGCAACCTCTGCCTCC#.(((((((.(((((((((((((#))).))).)))))))))))))).	3010	3033	1.0	-25.7	1	0.001217404	0.426	0.0	0.0	-4.849714495602881	20	23	14	3UTR	MIRT052247	0	0
hsa-let-7b-5p	NM_004130	GYG1	TGAGGTAGTAGGTTGTGTGGTT#CCTTACCTGCTACTGCCTCAA#(((((((((((...(((.((..#)).)))...))))))))))).	4974	4995	1.0	-22.3	1	0.04848624	0.529	0.0	0.0	-9.430348285984671	16	21	11	3UTR	MIRT052247	0	0
hsa-let-7b-5p	NM_004177	STX3	TGAGGTAGTAGGTTGTGTGGTT#AGCACAGCGCCTGCTGCTTACAG#(((((((((((((..((((.(.#).))))..))))))))))).)).	4652	4675	1.0	-23.0	1	6.46635e-06	0.559	0.0	0.0	-5.529863923972706	18	23	11	3UTR	MIRT760988	1	1
hsa-let-7b-5p	NM_004265	FADS2	TGAGGTAGTAGGTTGTGTGGTT#ACCACATGGCCTTGCCTCGG#(((((((..((((((((((((.#))))))))))))))))))).	2575	2595	1.0	-26.1	1	6.593594e-05	0.397	0.10158900000000003	0.1374878125	-7.307599033628058	19	20	19	3UTR	MIRT001634	0	0
hsa-let-7b-5p	NM_004401	DFFA	TGAGGTAGTAGGTTGTGTGGTT#ACCACATGACCGACAGACCG#...(((.((.(((((((((((.#))))))))))).))..))).	5177	5197	1.0	-21.3	0	0.03720698	0.441	0.0	0.0	-9.300733196878237	16	20	11	3UTR	MIRT052026	0	0
hsa-let-7b-5p	NM_004423	DVL3	TGAGGTAGTAGGTTGTGTGGTT#GCCTGCTGCCTCAG#(((((((((((((.........#))))))))))))).	2935	2949	1.0	-22.7	1	0.011586	0.412	-0.1409743846153846	-0.03949876062499996	-5.762913004276319	13	14	13	3UTR	MIRT523985	1	1
hsa-let-7b-5p	NM_004438	EPHA4	TGAGGTAGTAGGTTGTGTGGTT#CCAGCCAACTTACTGCCA#...((((((((((((..(((..#)))..)))))))))))).	5212	5230	1.0	-23.6	0	0.06620635	0.603	1.426987425	1.4131405087500002	-6.747589273982352	15	18	12	3UTR	MIRT548343	1	1
hsa-let-7b-5p	NM_004481	GALNT2	TGAGGTAGTAGGTTGTGTGGTT#CCACACCCCGCCTGGCCAAGATGACTGCTTCAG#(((((((((((((.((((((..#))))))...))))..........))))))))).	3017	3050	1.0	-22.7	1	0.003983314	0.412	0.0	0.0	-4.794414363722071	19	33	9	3UTR	MIRT032309	1	1
hsa-let-7b-5p	NM_004555	NFATC3	TGAGGTAGTAGGTTGTGTGGTT#AGCCCACACCTATGCCTCAG#(((((((.((((.((((.((((#))))))))))))))))))).	4140	4160	1.0	-23.8	1	0.10375	0.574	0.0	0.0	-7.5403399880485384	19	20	19	3UTR	MIRT052288	0	0
hsa-let-7b-5p	NM_004707	ATG12	TGAGGTAGTAGGTTGTGTGGTT#GGCTCATTGCAACCTCTACCTCC#.(((((((.(((((((((((((#))).))).)))))))))))))).	2174	2197	1.0	-23.2	1	0.001828149	0.471	2.6643066800000006	2.36646217	-4.849714495602881	20	23	14	3UTR	MIRT481391	0	0
hsa-let-7b-5p	NM_004712	HGS	TGAGGTAGTAGGTTGTGTGGTT#CCAAGCAGCCTGTGCCCTCT#.((((..(((((((((.(((..#))).)))))))))..)))).	2694	2714	1.0	-20.7	0	0.01363665	0.338	-0.24630555555555553	0.005330837499999935	-7.2379701334214825	16	20	9	3UTR	MIRT052221	0	0
hsa-let-7b-5p	NM_004781	VAMP3	TGAGGTAGTAGGTTGTGTGGTT#GGCCACAGTGCCCAGACCCATGTAACCCACTGGCTCC#.(((.((((.((((((((((..#.)))))))))).)))).))).	2049	2086	1.0	-20.3	0	0.01552646	0.471	0.45085759999999997	0.38203677	-9.154868480497768	17	21	10	3UTR	MIRT032396	0	0
hsa-let-7b-5p	NM_203390	RBM12B	TGAGGTAGTAGGTTGTGTGGTT#TCATGCTTTTGCTGCCTCAC#((((((((((((..((((((..#)))))).)))))))))))).	4541	4561	1.0	-21.1	1	0.01469671	0.618	1.036011	0.41903236875000005	-6.083544976388314	18	20	12	3UTR	MIRT032302	0	0
hsa-let-7b-5p	NM_206853	QKI	TGAGGTAGTAGGTTGTGTGGTT#TCACATCTCCTCTGCCTTAG#((((((((.(((..((((((..#))))))..))))))))))).	4882	4902	1.0	-21.8	1	0.1065149	0.618	3.705825625	2.967578912500001	-7.139934634634077	17	20	11	3UTR	MIRT052209	0	0
hsa-let-7b-5p	NM_206854	QKI	TGAGGTAGTAGGTTGTGTGGTT#TCACATCTCCTCTGCCTTAG#((((((((.(((..((((((..#))))))..))))))))))).	6161	6181	1.0	-21.8	1	0.1065149	0.618	3.705825625	2.967578912500001	-7.139934634634077	17	20	11	3UTR	MIRT052209	0	0
hsa-let-7b-5p	NM_206855	QKI	TGAGGTAGTAGGTTGTGTGGTT#TCACATCTCCTCTGCCTTAG#((((((((.(((..((((((..#))))))..))))))))))).	7108	7128	1.0	-21.8	1	0.1065149	0.618	3.705825625	2.967578912500001	-7.139934634634077	17	20	11	3UTR	MIRT052209	0	0
hsa-let-7b-5p	NM_206925	CA12	TGAGGTAGTAGGTTGTGTGGTT#AGCCACTTCTGCAGGATCCCTACTGCCA#...(((((((((((((((((((#))))))....))))....))))))))).	2194	2222	1.0	-22.4	0	0.0009114882	0.574	0.010308166666666665	-0.04318352499999999	-6.514540193678739	19	28	9	3UTR	MIRT032380	0	0
hsa-let-7b-5p	NM_207344	SPRYD4	TGAGGTAGTAGGTTGTGTGGTT#GGCTCACTGCAACCTCTGCCTCC#.(((((((.(((((((((((((#))).))).)))))))))))))).	4019	4042	1.0	-25.7	1	0.00287941	0.368	0.0	0.0	-4.849714495602881	20	23	14	3UTR	MIRT001588	1	1
hsa-let-7b-5p	NM_207406	BEND4	TGAGGTAGTAGGTTGTGTGGTT#GACCTACAGCTTTTGCCTGAG#(.((((((.((((((((.((((#)))))))))))))))))).).	4428	4449	1.0	-19.6	1	0.0006545863	0.485	0.0	0.0	-6.157639986462598	19	21	18	3UTR	MIRT549205	1	1
hsa-let-7b-5p	XM_005247590	CDV3	TGAGGTAGTAGGTTGTGTGGTT#GACTACCTCAGATTTGCTGCACTCAT#((((((((((((((..((((((#))))))....)))))))))).)))).	1461	1487	1.0	-20.4	1	0.02550835	0.559	0.0	0.0	-4.906073086755913	20	26	10	3UTR	MIRT255311	1	1
hsa-let-7b-5p	XM_005248116	TMEM33	TGAGGTAGTAGGTTGTGTGGTT#GCCATCTCAGCTCACTGCAACCTCTGCCTCC#.(((((((.(((((((((((((#.))).))).)))))))))))))).	4811	4842	1.0	-26.1	1	0.01701837	0.426	0.0	0.0	-4.849714495602881	20	24	14	3UTR	MIRT032486	0	0
hsa-let-7b-5p	XM_005248116	TMEM33	TGAGGTAGTAGGTTGTGTGGTT#GGCTCACTGCAACCTCTGCCTCC#.(((((((.(((((((((((((#))).))).)))))))))))))).	5514	5537	1.0	-25.7	1	0.0005328116	0.426	0.0	0.0	-4.849714495602881	20	23	14	3UTR	MIRT032486	0	0
hsa-let-7b-5p	XM_005248117	TMEM33	TGAGGTAGTAGGTTGTGTGGTT#GCCATCTCAGCTCACTGCAACCTCTGCCTCC#.(((((((.(((((((((((((#.))).))).)))))))))))))).	4763	4794	1.0	-26.1	1	0.01701837	0.426	0.0	0.0	-4.849714495602881	20	24	14	3UTR	MIRT032486	0	0
hsa-let-7b-5p	XM_005248117	TMEM33	TGAGGTAGTAGGTTGTGTGGTT#GGCTCACTGCAACCTCTGCCTCC#.(((((((.(((((((((((((#))).))).)))))))))))))).	5466	5489	1.0	-25.7	1	0.0005328116	0.426	0.0	0.0	-4.849714495602881	20	23	14	3UTR	MIRT032486	0	0
hsa-let-7b-5p	XM_005249996	RAB19	TGAGGTAGTAGGTTGTGTGGTT#GGCTCACTGCAACCTCTACCTCC#.(((((((.(((((((((((((#))).))).)))))))))))))).	1580	1603	1.0	-25.7	1	0.01604808	0.456	0.0	0.0	-4.849714495602881	20	23	14	3UTR	MIRT681741	0	0
hsa-let-7b-5p	XM_005250154	CUX1	TGAGGTAGTAGGTTGTGTGGTT#GCCCGCAGCCTGACCTCT#.(((((..(((((((((.(((.#))))))))))))))))).	2288	2306	1.0	-23.7	0	4.788886e-05	0.324	0.0	0.0	-7.650646301409068	17	18	17	3UTR	MIRT052342	0	1
hsa-let-7b-5p	XM_005251061	YWHAZ	TGAGGTAGTAGGTTGTGTGGTT#GGCCGCATGATCTTTCTGGCTCC#.(((.(((.(((((((((((((#)))))))))))))..))).))).	2811	2834	1.0	-22.7	0	0.02389094	0.5	0.0	0.0	-8.968751670415353	19	23	13	3UTR	MIRT052271	0	0
hsa-let-7b-5p	XM_005251063	YWHAZ	TGAGGTAGTAGGTTGTGTGGTT#GGCCGCATGATCTTTCTGGCTCC#.(((.(((.(((((((((((((#)))))))))))))..))).))).	2857	2880	1.0	-22.7	0	0.02389094	0.5	0.0	0.0	-8.968751670415353	19	23	13	3UTR	MIRT052271	0	0
hsa-let-7b-5p	XM_005251917	NR6A1	TGAGGTAGTAGGTTGTGTGGTT#AGCCACGGTGGCCCTGCCTCT#.(((((((..((((.(((((((#)))))))..))))))))))).	6052	6073	1.0	-23.0	1	0.0001941278	0.368	0.0	0.0	-6.827670524181695	18	21	11	3UTR	MIRT471967	1	1
hsa-let-7b-5p	XM_005252916	RHOG	TGAGGTAGTAGGTTGTGTGGTT#CCACACAGTTGTTGCTGCCTA#..(((((((((.((((((((..#))))))))...))))))))).	1350	1371	1.0	-23.1	1	0.0007990612	0.456	0.0	0.0	-8.303804028968646	17	21	9	3UTR	MIRT001598	0	0
hsa-let-7b-5p	XM_005258317	KIAA1328	TGAGGTAGTAGGTTGTGTGGTT#GCCCACCCTGCTGCCCAA#((.(((((((((..(((.(((.#))))))))))))))))).	4738	4756	1.0	-22.0	0	0.1161746	0.485	0.0	0.0	-7.641084450694762	17	18	17	3UTR	MIRT702487	0	0
hsa-let-7b-5p	XM_005258317	KIAA1328	TGAGGTAGTAGGTTGTGTGGTT#AGCCATCAGCCTGGCAGCTGCCCAT#((.((((((((((((.((((((#))))))))))))....)))))))).	2717	2742	1.0	-22.1	0	0.0001357625	0.441	0.0	0.0	-5.728163000811725	20	25	12	3UTR	MIRT702487	0	0
hsa-let-7b-5p	XM_005258318	KIAA1328	TGAGGTAGTAGGTTGTGTGGTT#GCCCACCCTGCTGCCCAA#((.(((((((((..(((.(((.#))))))))))))))))).	4687	4705	1.0	-22.0	0	0.1161746	0.485	0.0	0.0	-7.641084450694762	17	18	17	3UTR	MIRT702487	0	0
hsa-let-7b-5p	XM_005258318	KIAA1328	TGAGGTAGTAGGTTGTGTGGTT#AGCCATCAGCCTGGCAGCTGCCCAT#((.((((((((((((.((((((#))))))))))))....)))))))).	2666	2691	1.0	-22.1	0	0.0001357625	0.441	0.0	0.0	-5.728163000811725	20	25	12	3UTR	MIRT702487	0	0
hsa-let-7b-5p	XM_005258459	HNRNPUL1	TGAGGTAGTAGGTTGTGTGGTT#CCTCCAGCCCACTGCCTCC#.((((((((.(((((.(.((..#)).)))))).)))))))).	2857	2876	1.0	-23.1	1	0.002393612	0.324	0.0	0.0	-5.2688803859889095	16	19	8	3UTR	MIRT052204	0	0
hsa-let-7b-5p	XM_005258464	HNRNPUL1	TGAGGTAGTAGGTTGTGTGGTT#CCTCCAGCCCACTGCCTCC#.((((((((.(((((.(.((..#)).)))))).)))))))).	2456	2475	1.0	-23.1	1	0.002393612	0.324	0.0	0.0	-5.2688803859889095	16	19	8	3UTR	MIRT052204	0	0
hsa-let-7b-5p	XM_005263236	NAA15	TGAGGTAGTAGGTTGTGTGGTT#GACCATATCTAGTATATAATATTTTTGTCACGCACCTGCTGCATTGCTCT#.(((((((((((.(((((((..#.)))))))))))))))....))).	2903	2953	1.0	-22.8	1	0.004344147	0.632	0.0	0.0	-5.08245545002336	18	24	15	3UTR	MIRT032425	0	0
hsa-let-7b-5p	XM_005263728	RALB	TGAGGTAGTAGGTTGTGTGGTT#GCCAGACCTTCTGCTACCTCT#.(((((((((((..((.((((.#)))).))..))))))))))).	2332	2353	1.0	-25.6	1	0.0125947	0.574	0.0	0.0	-5.9392953675437665	17	21	11	3UTR	MIRT052235	1	1
hsa-let-7b-5p	XM_005268502	TCOF1	TGAGGTAGTAGGTTGTGTGGTT#CCACCGACCTCTGCCCAC#((.(((((.((((((.((((..#))))))))))))))))).	4696	4714	1.0	-23.0	0	0.1143899	0.426	0.0	0.0	-6.784552659057488	17	18	17	3UTR	MIRT032257	0	0
hsa-let-7b-5p	XM_005268506	TCOF1	TGAGGTAGTAGGTTGTGTGGTT#CCACCGACCTCTGCCCAC#((.(((((.((((((.((((..#))))))))))))))))).	4582	4600	1.0	-23.0	0	0.1143899	0.426	0.0	0.0	-6.784552659057488	17	18	17	3UTR	MIRT032257	0	0
hsa-let-7b-5p	XM_005272324	VPS28	TGAGGTAGTAGGTTGTGTGGTT#GCCACACAGGCCGTGGTCATCCACACAACTCACTGTCTGCAGCTGCCTG#..(((((((.((((((((((..#.))))))))))...........))))))).	774	823	1.0	-22.9	1	0.000955982	0.471	0.0	0.0	-6.199507187700468	17	30	10	3UTR	MIRT052309	0	0
hsa-let-7b-5p	XM_006715854	CUX1	TGAGGTAGTAGGTTGTGTGGTT#ACCATCAAAACCTGCTACTTTG#.(((((((((((((.((((((.#)))).)).))))))))))))).	8423	8445	1.0	-23.6	1	0.01552696	0.529	0.0	0.0	-4.528774397607753	19	22	13	3UTR	MIRT052342	0	1
hsa-let-7b-5p	XM_006722952	CDC34	TGAGGTAGTAGGTTGTGTGGTT#GACCCGTGGCTCCTTAGACGACAGACTACCTCAC#(((((((((..(((((.(((..#.))).)))))..))))))))).	921	955	1.0	-23.1	1	0.02038459	0.368	0.0	0.0	-8.004855389940193	17	22	9	3UTR	MIRT001229	1	1
hsa-let-7b-5p	XM_006723403	OPA3	TGAGGTAGTAGGTTGTGTGGTT#GACCCGACAGCCTGTCTTCATGTAGCAGTACCCTCCTGCCTCC#.(((((((((((((((..((((#))))..)))))))).....................))))))).	2435	2478	1.0	-23.5	1	0.01415204	0.368	0.0	0.0	-3.793324837357118	19	43	8	3UTR	MIRT461095	0	1
hsa-let-7b-5p	XM_006723403	OPA3	TGAGGTAGTAGGTTGTGTGGTT#GGCTCACTGCAACTTCTACCTCC#.(((((((.(((((((((((((#))).))).)))))))))))))).	4125	4148	1.0	-23.0	1	0.1146813	0.441	0.0	0.0	-4.849714495602881	20	23	14	3UTR	MIRT461095	0	1
hsa-let-7b-5p	XM_011517029	RBM12B	TGAGGTAGTAGGTTGTGTGGTT#TCATGCTTTTGCTGCCTCAC#((((((((((((..((((((..#)))))).)))))))))))).	4492	4512	1.0	-21.1	1	0.01469671	0.618	0.0	0.0	-6.083544976388314	18	20	12	3UTR	MIRT032302	0	0
hsa-let-7b-5p	XM_011519747	CUL2	TGAGGTAGTAGGTTGTGTGGTT#ACCACACCCCTCCTCCCTCAA#(((((.((.(((..(((((((.#))))))).))).)).))))).	3727	3748	1.0	-22.6	0	0.9903817	0.603	0.0	0.0	-9.040893395827124	17	21	7	3UTR	MIRT052315	0	0
hsa-let-7b-5p	XM_011522546	RBFOX1	TGAGGTAGTAGGTTGTGTGGTT#ATCACGCAATCTGCAAACCCAG#((.(((.((((((((((((((.#))))))))))))))..))))).	3871	3893	1.0	-22.5	0	0.003250888	0.647	0.0	0.0	-7.038800455379432	19	22	14	3UTR	MIRT032440	1	1
hsa-let-7b-5p	XM_011525522	EIF4A3	TGAGGTAGTAGGTTGTGTGGTT#AGCCACCATGCCTGGCCTCAT#((((((..(((((((.((((((#)))))))).))))))))))).	2271	2292	1.0	-22.1	0	0.002432298	0.618	0.0	0.0	-8.027944990557229	19	21	11	3UTR	MIRT681800	0	0
hsa-let-7b-5p	XM_011541315	IGSF3	TGAGGTAGTAGGTTGTGTGGTT#TCACAGAGACAGACTGCCTCT#.((((((((..(((.(((((..#)))))..)))..)))))))).	4529	4550	1.0	-21.5	1	5.910504e-07	0.5	0.0	0.0	-8.596055341346283	16	21	8	3UTR	MIRT032291	0	0
hsa-let-7b-5p	XM_011541538	SH3GLB1	TGAGGTAGTAGGTTGTGTGGTT#AGCCTATAGCCAACTTTGCCTCAA#(((((((((.(((((((.((((#))))))))))).)))..)))))).	4670	4694	1.0	-21.9	1	0.0486071	0.603	0.0	0.0	-5.180080914529843	20	24	11	3UTR	MIRT032399	0	0
hsa-let-7b-5p	XM_011541804	PITHD1	TGAGGTAGTAGGTTGTGTGGTT#GGCTGCCACAGCCTCTGCCA#...(((((.(((((((((((((#)))))).)))))))))))).	783	803	1.0	-22.8	0	3.489754e-06	0.441	0.0	0.0	-7.570929851924502	18	20	12	3UTR	MIRT032469	0	0
hsa-let-7b-5p	XM_011544133	RBM34	TGAGGTAGTAGGTTGTGTGGTT#GGCGTGATCTTGGCTCACTGCAACCTCTGCCTTC#.(((((((.(((((((((((((#.))).))).)))))))))))))).	1502	1536	1.0	-24.0	1	0.002079385	0.397	0.0	0.0	-4.849714495602881	20	24	14	3UTR	MIRT032382	0	0
hsa-let-7b-5p	XM_017002491	ZNF644	TGAGGTAGTAGGTTGTGTGGTT#TCAGACAATAAAGTGGTGCATCCATGCTACCTCC#.(((((((((((.(((......#.))).)).))))))))).	4902	4936	1.0	-19.3	1	0.01579386	0.603	0.0	0.0	-5.08245545002336	14	18	9	3UTR	MIRT505019	1	1
hsa-let-7b-5p	XM_017004394	SEMA4C	TGAGGTAGTAGGTTGTGTGGTT#GCACAGGCACCAGCTACCTCAG#(((((((((.((.(((.((((.#)).)).))))).))))))))).	2352	2374	1.0	-22.7	1	0.002847457	0.412	0.0	0.0	-6.469211527196086	18	22	9	3UTR	MIRT501242	1	1
hsa-let-7b-5p	XM_017008690	SLC10A7	TGAGGTAGTAGGTTGTGTGGTT#AACTCCTGAGCTCAGGCAATCTGCCTGCCTCAT#((((((((((((((((.(((((#.))).)).))))))))).))))))).	4463	4496	1.0	-27.0	1	0.01388605	0.5	0.0	0.0	-3.937574446201665	21	26	9	3UTR	MIRT501174	1	1
hsa-let-7b-5p	XM_017013408	RBM12B	TGAGGTAGTAGGTTGTGTGGTT#TCATGCTTTTGCTGCCTCAC#((((((((((((..((((((..#)))))).)))))))))))).	4559	4579	1.0	-21.1	1	0.01469671	0.618	0.0	0.0	-6.083544976388314	18	20	12	3UTR	MIRT032302	0	0
hsa-let-7b-5p	NM_001048201	UHRF1	TGAGGTAGTAGGTTGTGTGGTT#ACCAAAGTTTGCAGCCTATACCTCAA#((((((.((((((((((((((.#)))).....)))))))))))))))).	3675	3701	1.0	-23.2	0	0.1312717	0.706	2.866267721052631	0.8605404987499998	-5.4812609810729835	20	26	16	3UTR	MIRT001580	0	0
hsa-let-7b-5p	NM_001048222	DBNDD2	TGAGGTAGTAGGTTGTGTGGTT#GACCACATCTAGGACCTCCTCCTCC#.((((.((.(((((((((((((#))))))))....))))).)))))).	594	619	1.0	-22.4	0	0.004001118	0.412	1.9628680882352942	1.56400713125	-6.750673256795928	19	25	8	3UTR	MIRT052207	0	0
hsa-let-7b-5p	NM_001048222	DBNDD2	TGAGGTAGTAGGTTGTGTGGTT#CCACCAACCTGCATAGCCCAA#((.(((.((((((((.((((..#))))))))))))...))))).	635	656	1.0	-22.4	0	0.1707828	0.426	1.39401325	2.2845112750000003	-7.271849535683045	17	21	12	3UTR	MIRT052207	0	0
hsa-let-7b-5p	NM_001048224	DBNDD2	TGAGGTAGTAGGTTGTGTGGTT#GACCACATCTAGGACCTCCTCCTCC#.((((.((.(((((((((((((#))))))))....))))).)))))).	593	618	1.0	-22.4	0	0.004001118	0.412	1.9628680882352942	1.56400713125	-6.750673256795928	19	25	8	3UTR	MIRT052207	0	0
hsa-let-7b-5p	NM_001048224	DBNDD2	TGAGGTAGTAGGTTGTGTGGTT#CCACCAACCTGCATAGCCCAA#((.(((.((((((((.((((..#))))))))))))...))))).	634	655	1.0	-22.4	0	0.1707828	0.426	1.39401325	2.2845112750000003	-7.271849535683045	17	21	12	3UTR	MIRT052207	0	0
hsa-let-7b-5p	NM_001077619	UBXN2B	TGAGGTAGTAGGTTGTGTGGTT#AGCCTCCACCTACTGCCCAA#((.(((((((((.((.(.((((#)))).)))))))))))))).	4102	4122	1.0	-21.6	0	0.161812	0.529	-0.23123344444444444	-0.16347946999999996	-7.017293613477968	18	20	14	3UTR	MIRT240327	0	0
hsa-let-7b-5p	NM_001077619	UBXN2B	TGAGGTAGTAGGTTGTGTGGTT#GCTCACCGCAACCTCCGCCTCC#.(((((.(.((((((((((((.#)).))).)))))))).))))).	1713	1735	1.0	-21.0	0	0.009535675	0.471	0.061230205714285724	0.10680295625000003	-6.3934010304742	18	22	8	3UTR	MIRT240327	0	0
hsa-let-7b-5p	NM_001079673	FNDC3A	TGAGGTAGTAGGTTGTGTGGTT#CCATAAGTTTCTGCTGCTTCT#.(((((((((((...(((((..#)))))....))))))))))).	4847	4868	1.0	-20.6	1	0.007471091	0.559	1.720968181818182	1.0489709275	-6.674744927794402	16	21	11	3UTR	MIRT001631	1	1
hsa-let-7b-5p	NM_001079812	DIAPH1	TGAGGTAGTAGGTTGTGTGGTT#ACCACCCTGACCCTGTCTTTCTCTCTGGCCTGCTGCTCTCT#.((((((((((((((.(((((.#))))))....................)))))))))).))).	3985	4026	1.0	-21.3	1	0.04138898	0.441	1.7635187634285716	1.8341463462500007	-4.026373917660731	19	41	10	3UTR	MIRT032344	0	0
hsa-let-7b-5p	NM_001080391	SP100	TGAGGTAGTAGGTTGTGTGGTT#GGCCAGAGTGCAATGGCGTGATCTTGGCTCACCACAACCTCTGCCTCC#.(((((((.(((((((((((((#.))).))).)))))))))))))).	4339	4387	1.0	-26.3	1	0.05277463	0.412	0.04246066666666668	0.015529624999999995	-4.849714495602881	20	24	14	3UTR	MIRT032264	0	0
hsa-let-7b-5p	NM_001080430	TOX3	TGAGGTAGTAGGTTGTGTGGTT#AACCACACTTCCAGGCTATCTGAA#(.(((((((.((..((((((((#))))))))..))..))))))).).	2524	2548	1.0	-24.3	1	0.0003121879	0.574	3.293575	2.9697799962499993	-8.489727326731664	18	24	8	3UTR	MIRT052048	0	0
hsa-let-7b-5p	NM_001105545	ECHDC1	TGAGGTAGTAGGTTGTGTGGTT#CTATACAAAACCTATTCCTGGC#(.(((.((((((((((((((..#)))))))..)))))))))).).	1212	1234	1.0	-18.1	0	0.04588554	0.676	4.0559409	2.66535761125	-7.002209089409883	18	22	10	3UTR	MIRT549850	0	1
hsa-let-7b-5p	NM_001114600	SZRD1	TGAGGTAGTAGGTTGTGTGGTT#CCATACCCCTCAGGGTGGTTCCCTACCAGCCAGGCTTACTACTTCT#.((((((((((((((..((((.#.))))..))).))))))))))).	1345	1391	1.0	-22.9	1	0.0006306223	0.456	1.4755167333333334	1.0443654962500002	-4.026373917660731	18	23	11	3UTR	MIRT051894	0	0
hsa-let-7b-5p	NM_001115113	WDR26	TGAGGTAGTAGGTTGTGTGGTT#GACCCTATCACCTCTGCCTCAC#((((((((.((((.(((.((((#)))).))).)))))))))))).	5988	6010	1.0	-23.2	1	0.03816279	0.574	0.0	0.0	-5.850804021967834	19	22	12	3UTR	MIRT052146	0	0
hsa-let-7b-5p	NM_001122770	ZBTB37	TGAGGTAGTAGGTTGTGTGGTT#AGCTCACTGCAGCCTCAACCTCCTGGACTCAAGCAATCCTCCTACCTCAT#((((((((.(((((((.(((((#.))).)).)))).))).)))))))).	10808	10858	1.0	-22.7	1	0.4417101	0.426	0.0	0.0	-4.993964104447428	20	26	8	3UTR	MIRT574366	1	0
hsa-let-7b-5p	NM_001126122	SLC25A19	TGAGGTAGTAGGTTGTGTGGTT#ACCTATCAGCCCTGCCTG#..((((((..(((((...(((.#)))...))))))))))).	1379	1397	1.0	-17.6	1	0.0335648	0.441	2.479601666666667	3.2161229725000005	-7.488945926249844	14	18	11	3UTR	MIRT032289	0	0
hsa-let-7b-5p	NM_001127457	CRY2	TGAGGTAGTAGGTTGTGTGGTT#GACCACCTCCGCCTACTTCTCC#.((((.(((((((.(.((((((#))))))..).))))))))))).	3708	3730	1.0	-21.6	0	0.1017702	0.412	-0.14868997142857143	0.23807110375	-6.784172596374183	18	22	11	3UTR	MIRT180600	1	1
hsa-let-7b-5p	NM_001127691	RHD	TGAGGTAGTAGGTTGTGTGGTT#ACCATCTTGGCTCACTGCAACCTCTACCTCC#.(((((((.(((((((((((((#.))).))).)))))))))))))).	1386	1417	1.0	-25.9	1	0.02089599	0.441	0.023477533333333345	-0.0008965125000000088	-4.849714495602881	20	24	14	3UTR	MIRT453404	0	0
hsa-let-7b-5p	NM_001130700	IPCEF1	TGAGGTAGTAGGTTGTGTGGTT#GGCACGATTTTAGCTCACTGCAACCTCTGCCTCC#.(((((((.(((((((((((((#.))).))).)))))))))))))).	5597	5631	1.0	-26.0	1	0.000370333	0.441	0.0	0.0	-4.849714495602881	20	24	14	3UTR	MIRT052329	0	0
hsa-let-7b-5p	NM_001130723	AHCYL2	TGAGGTAGTAGGTTGTGTGGTT#CCAAAAATCATAACCTGCTGTTTCT#.(((((((((((((((((((..#))).....)))))))))))))))).	3643	3668	1.0	-20.4	1	0.1036086	0.603	0.8588790458333334	0.45238543500000006	-3.793324837357118	19	25	16	3UTR	MIRT482223	0	0
hsa-let-7b-5p	NM_001130841	RTCA	TGAGGTAGTAGGTTGTGTGGTT#AACCTCTGCCTCCCGGGTTCAAGCAATTCTACTGCCTCAG#((((((((((((((((.(((..#.))).))))).))))))))))).	1802	1842	1.0	-23.7	1	0.004876229	0.485	-0.19552329411764707	0.07989255249999996	-3.937574446201665	19	23	11	3UTR	MIRT032266	1	0
hsa-let-7b-5p	NM_001130841	RTCA	TGAGGTAGTAGGTTGTGTGGTT#TCAAGCAATTCTACTGCCTCAG#((((((((((((((((.(((..#))).))))).))))))))))).	1820	1842	1.0	-23.7	1	0.004876229	0.485	-0.04228152941176471	-0.009657727500000006	-3.937574446201665	19	22	11	3UTR	MIRT032266	1	0
hsa-let-7b-5p	NM_001131005	MEF2C	TGAGGTAGTAGGTTGTGTGGTT#AGCCACATATCTTCTACATCAA#(((.((((.(((.(((((((((#))))))))).))))))).))).	5630	5652	1.0	-20.3	0	0.1611524	0.676	7.053884222222223	6.8526400999999995	-9.315116992072863	19	22	9	3UTR	MIRT052262	1	1
hsa-let-7b-5p	NM_001131035	ZCCHC9	TGAGGTAGTAGGTTGTGTGGTT#ACTATCATGAGTTACTACCTCAT#(((((((((((.(((((((((.#)))).))))).))))))))))).	956	979	1.0	-24.1	1	0.002227966	0.588	-0.08146619999999996	0.9048169150000003	-7.284377755798021	20	23	11	3UTR	MIRT052011	0	1
hsa-let-7b-5p	NM_001134375	CCNJ	TGAGGTAGTAGGTTGTGTGGTT#AACCCAGCAACCTGGAGTCCAATTTTCAGTATTTTAACTACCTCAA#((((((((((((((((..((((#))))..))))))).......................))))))))).	3264	3310	1.0	-24.8	1	0.0850726	0.676	2.652597328205129	2.1174548599999996	-3.937574446201665	20	46	9	3UTR	MIRT005036	1	1
hsa-let-7b-5p	NM_001134376	CCNJ	TGAGGTAGTAGGTTGTGTGGTT#AACCCAGCAACCTGGAGTCCAATTTTCAGTATTTTAACTACCTCAA#((((((((((((((((..((((#))))..))))))).......................))))))))).	3228	3274	1.0	-24.8	1	0.0850726	0.676	2.652597328205129	2.1174548599999996	-3.937574446201665	20	46	9	3UTR	MIRT005036	1	1
hsa-let-7b-5p	NM_001134422	CDV3	TGAGGTAGTAGGTTGTGTGGTT#CCACGTGGACTTGCTCCTCT#.((((.((((((((.(((((..#)))))..)))))))))))).	1193	1213	1.0	-22.3	0	0.002620558	0.544	0.46074309	0.5054667692499999	-6.429733158800799	17	20	12	3UTR	MIRT255311	1	1
hsa-let-7b-5p	NM_001134422	CDV3	TGAGGTAGTAGGTTGTGTGGTT#GACTACCTCAGATTTGCTGCACTCAT#((((((((((((((..((((((#))))))....)))))))))).)))).	2201	2227	1.0	-20.4	1	0.02550835	0.559	3.4019233333333334	3.6947157125	-4.906073086755913	20	26	10	3UTR	MIRT255311	1	1
hsa-let-7b-5p	NM_001134423	CDV3	TGAGGTAGTAGGTTGTGTGGTT#CCACGTGGACTTGCTCCTCT#.((((.((((((((.(((((..#)))))..)))))))))))).	750	770	1.0	-22.3	0	0.002620558	0.544	0.46074309	0.5054667692499999	-6.429733158800799	17	20	12	3UTR	MIRT255311	1	1
hsa-let-7b-5p	NM_001134423	CDV3	TGAGGTAGTAGGTTGTGTGGTT#GACTACCTCAGATTTGCTGCACTCAT#((((((((((((((..((((((#))))))....)))))))))).)))).	1758	1784	1.0	-20.4	1	0.02550835	0.559	3.4019233333333334	3.6947157125	-4.906073086755913	20	26	10	3UTR	MIRT255311	1	1
hsa-let-7b-5p	NM_001135244	TCOF1	TGAGGTAGTAGGTTGTGTGGTT#CCACCGACCTCTGCCCAC#((.(((((.((((((.((((..#))))))))))))))))).	4471	4489	1.0	-23.0	0	0.1143899	0.426	-0.13338399999999997	0.43740331875	-6.784552659057488	17	18	17	3UTR	MIRT032257	0	0
hsa-let-7b-5p	NM_001135245	TCOF1	TGAGGTAGTAGGTTGTGTGGTT#CCACCGACCTCTGCCCAC#((.(((((.((((((.((((..#))))))))))))))))).	4354	4372	1.0	-23.0	0	0.1143899	0.426	-0.13338399999999997	0.43740331875	-6.784552659057488	17	18	17	3UTR	MIRT032257	0	0
hsa-let-7b-5p	NM_001135701	YWHAZ	TGAGGTAGTAGGTTGTGTGGTT#GGCCGCATGATCTTTCTGGCTCC#.(((.(((.(((((((((((((#)))))))))))))..))).))).	2419	2442	1.0	-22.7	0	0.02389094	0.5	-0.04207166769230767	1.4414619855000002	-8.968751670415353	19	23	13	3UTR	MIRT052271	0	0
hsa-let-7b-5p	NM_001135820	CEMIP2	TGAGGTAGTAGGTTGTGTGGTT#GACTTTACAAAATATGCTACCTCAA#((((((((((..(((((.((((#)))).)))))....)))))))))).	5585	5610	1.0	-22.1	1	0.1326827	0.603	1.57740766	2.3227735037499997	-10.10915223120837	19	25	10	3UTR	MIRT001585	1	1
hsa-let-7b-5p	NM_001136017	CCND3	TGAGGTAGTAGGTTGTGTGGTT#GGCCGCTGCCACCCACCTCCCTGCCTCC#.(((((((.((((.(.(((((.#.)))))).))))..))))))).	1116	1144	1.0	-23.1	1	0.0008254235	0.353	2.244340157142857	2.6273100937500002	-5.9396034934269	17	22	7	3UTR	MIRT052181	0	0
hsa-let-7b-5p	NM_001136126	CCND3	TGAGGTAGTAGGTTGTGTGGTT#GGCCGCTGCCACCCACCTCCCTGCCTCC#.(((((((.((((.(.(((((.#.)))))).))))..))))))).	694	722	1.0	-23.1	1	0.0008254235	0.353	1.1429117285714288	0.29600483749999995	-5.9396034934269	17	22	7	3UTR	MIRT052181	0	0
hsa-let-7b-5p	NM_001137675	ATXN1L	TGAGGTAGTAGGTTGTGTGGTT#CCGCTCACTGTCCTGCCTGCTGTCCTCT#.((((((((((((((.((((..#)))).)).......)))))))).)))).	5628	5656	1.0	-22.5	1	0.01056869	0.426	1.1277317681818182	0.9223609987500001	-4.026373917660731	18	28	8	3UTR	MIRT051885	1	0
hsa-let-7b-5p	NM_001142285	RPS24	TGAGGTAGTAGGTTGTGTGGTT#GGCTCACTGCAACCTCTGCTTCC#.(((((((.(((((((((((((#))).))).)))))))))))))).	1720	1743	1.0	-23.0	1	0.002612316	0.426	-0.22306066666666666	-0.274827086	-4.849714495602881	20	23	14	3UTR	MIRT052260	0	0
hsa-let-7b-5p	NM_031895	CACNG8	TGAGGTAGTAGGTTGTGTGGTT#GCCACACGGCTGTCCTCT#.((((.....(((((((((((.#)))))))))))..)))).	8754	8772	1.0	-22.4	0	0.001384393	0.353	0.044689	0.2072599725	-11.850501189176057	15	18	11	3UTR	MIRT052055	0	0
hsa-let-7b-5p	NM_032045	KREMEN1	TGAGGTAGTAGGTTGTGTGGTT#CCACACAACTGGGCATAGTGGTTCATGCCTG#..(((((...((((((((((..#))))))))))...............))))).	2515	2546	1.0	-19.8	0	0.00233044	0.456	-0.41989770000000004	0.028431325000000004	-9.569531775126862	15	31	10	3UTR	MIRT300890	1	1
hsa-let-7b-5p	NM_032175	UTP15	TGAGGTAGTAGGTTGTGTGGTT#CCACTGCAACCTCTGCCCTCC#.(((((((.(((((((((((..#)))).)))))))))))).)).	2841	2862	1.0	-23.8	1	0.004489751	0.426	-0.171636	-0.2620934912499999	-4.849714495602881	18	21	12	3UTR	MIRT032450	1	0
hsa-let-7b-5p	NM_032175	UTP15	TGAGGTAGTAGGTTGTGTGGTT#GACCTCAAGTGATCTACCTGCCTCT#.(((((((((((((.((.((((#)))).))...))))))).)))))).	2994	3019	1.0	-21.3	1	0.0196885	0.485	-0.20956573571428574	-0.10279046000000001	-4.528774397607753	19	25	7	3UTR	MIRT032450	1	0
hsa-let-7b-5p	NM_032186	ZNF644	TGAGGTAGTAGGTTGTGTGGTT#CCAGTTGCATTTCTCAGACAATAAAGTGGTGCATCCATGCTACCTCC#.(((((((((((.(((......#.))).)).))))))))).	1080	1127	1.0	-19.3	1	0.01579386	0.603	3.8311333333333337	3.23096295025	-5.08245545002336	14	18	9	3UTR	MIRT505019	1	1
hsa-let-7b-5p	NM_032338	LLPH	TGAGGTAGTAGGTTGTGTGGTT#ACTACACTTAGGCTATGTGATATAGCCTATTGCTTCT#.(((((((((((((((((.(..#.).))))))))))))))))).	5623	5660	1.0	-23.1	1	1.063607e-05	0.603	0.08653166235294117	0.12783567050000003	-3.793324837357118	18	21	17	3UTR	MIRT032394	0	0
hsa-let-7b-5p	NM_032339	MIEN1	TGAGGTAGTAGGTTGTGTGGTT#TGGCATAGCCAAGGCAAGGAAAATGAGTCCCACAGTAGACCCTGCCTCGT#((((((((..((((.(((((..#.)))))...)))))))))))).	897	947	1.0	-21.8	1	0.002011126	0.426	0.47140531249999995	0.30611922499999994	-6.971920133026242	17	22	12	3UTR	MIRT051901	0	0
hsa-let-7b-5p	NM_032408	BAZ1B	TGAGGTAGTAGGTTGTGTGGTT#ACCGCCAGCTTCCCCTGCCTCC#.(((((((.((((((.(((((.#)))))))))))...))))))).	5910	5932	1.0	-23.5	1	0.0753276	0.471	0.7057727714285714	0.51732298	-5.082763575906494	18	22	11	3UTR	MIRT032225	0	0
hsa-let-7b-5p	NM_032522	ZBTB37	TGAGGTAGTAGGTTGTGTGGTT#GACTCAAGCAATCTGCCTGCCTCAG#((((((((((((((((.(((((#))).)).))))))))).))))))).	3592	3617	1.0	-24.6	1	0.005034891	0.471	0.012000831764705906	-0.03467572200000001	-3.937574446201665	21	25	9	3UTR	MIRT574366	1	0
hsa-let-7b-5p	NM_032522	ZBTB37	TGAGGTAGTAGGTTGTGTGGTT#ACCATATTAGCCAGGATGGTCTCGATCTGCTGACCTCAT#((((((((((((((((.(((((#.))))).).......)))))))))).))))).	10143	10182	1.0	-22.7	1	0.01526265	0.441	0.14569712499999998	0.167442225	-3.937574446201665	21	32	10	3UTR	MIRT574366	1	0
hsa-let-7b-5p	NM_032522	ZBTB37	TGAGGTAGTAGGTTGTGTGGTT#GGCTCGCTGCAATCTCTGCCTCC#.(((((((.(((((((((((((#))).))).)))))))))))))).	3099	3122	1.0	-22.7	1	0.001013711	0.412	-0.37351226666666665	0.054169625	-4.849714495602881	20	23	14	3UTR	MIRT574366	1	0
hsa-let-7b-5p	NM_032581	FAM126A	TGAGGTAGTAGGTTGTGTGGTT#CCACATAGCTGACTCACCTCC#.((((((((.((((((((((..#)))))))))).))).))))).	7364	7385	1.0	-24.5	1	0.0572455	0.574	1.387541885	0.501064813125	-5.035831305685297	18	21	10	3UTR	MIRT052001	0	0
hsa-let-7b-5p	NM_032581	FAM126A	TGAGGTAGTAGGTTGTGTGGTT#CCACTACGGCCTACTGAAAGCCTA#..((((((((((((((((((..#)))).))))))))))....)))).	10131	10155	1.0	-23.9	1	0.003759926	0.647	0.33268892608695655	0.10440869249999997	-4.95700071937229	18	24	10	3UTR	MIRT052001	0	0
hsa-let-7b-5p	NM_032632	PAPOLA	TGAGGTAGTAGGTTGTGTGGTT#GCCAACTCAACCTGTTGTCTTCAA#(((((((((((((((.(((((.#)))).).)))))))))).))))).	2480	2504	1.0	-20.0	1	0.01283072	0.618	3.3663650000000005	3.474838423749999	-4.1706235265052785	20	24	10	3UTR	MIRT052114	0	0
hsa-let-7b-5p	NM_032664	FUT10	TGAGGTAGTAGGTTGTGTGGTT#GACCCACATACTTACTGCCTTT#.((((((((((((((((.((((#)))))))).)))))))))))).	2047	2069	1.0	-25.9	1	0.002255282	0.544	2.902111647058824	3.0013364412500003	-3.793324837357118	20	22	12	3UTR	MIRT458281	0	0
hsa-let-7b-5p	NM_032812	PLXDC2	TGAGGTAGTAGGTTGTGTGGTT#GACCATGCAGCTGTAAACCTTC#.(((((....((((((((((((#))))))))))))....))))).	8966	8988	1.0	-21.4	0	0.014524	0.588	0.5349226833333334	0.17246333125	-9.94954242798301	17	22	12	3UTR	MIRT032203	0	0
hsa-let-7b-5p	NM_032822	FAM136A	TGAGGTAGTAGGTTGTGTGGTT#TCACCAACTTATTACTTGAA#(.(((((((((((((.((((..#))))))))))))))))).).	1670	1690	1.0	-19.7	1	0.1842971	0.676	2.944226476923077	3.94892524875	-5.334299408520449	18	20	17	3UTR	MIRT052030	0	0
hsa-let-7b-5p	NM_032828	ZNF587	TGAGGTAGTAGGTTGTGTGGTT#GGCTCACTGCAACCTCTGCCTCC#.(((((((.(((((((((((((#))).))).)))))))))))))).	2694	2717	1.0	-25.7	1	0.01256908	0.471	0.19126935999999997	0.007911104625000012	-4.849714495602881	20	23	14	3UTR	MIRT457680	0	1
hsa-let-7b-5p	NM_032837	FAM104A	TGAGGTAGTAGGTTGTGTGGTT#GACACAGGCACTTCTCTCCACAGCCTGCTAACCTA#..(((((((((((((((.((..#.)))))))))))))).))).	2099	2134	1.0	-23.4	1	0.001357397	0.485	1.5235047000000002	3.4204407475	-4.95700071937229	17	20	14	3UTR	MIRT574787	1	1
hsa-let-7b-5p	NM_032875	FBXL20	TGAGGTAGTAGGTTGTGTGGTT#GCCATGGCACAATCTCAGTTCACTGCAACCTCTGCCTCC#.(((((((.(((((((((((..#.)))).)))))))))))))).	6709	6748	1.0	-25.3	1	0.0003000648	0.485	-0.10607741666666666	0.03665441774999999	-4.849714495602881	18	21	14	3UTR	MIRT548268	0	0
hsa-let-7b-5p	NM_032924	ZNF3	TGAGGTAGTAGGTTGTGTGGTT#AGCCACACACCCATTTTCCTCAC#(((((.(((.((.(((((((((#))))))))))).)))..))))).	1630	1653	1.0	-22.7	0	0.05465086	0.5	2.0685124444444445	1.5644710712499998	-8.370170288389133	19	23	11	3UTR	MIRT052240	0	0
hsa-let-7b-5p	NM_032932	RAB11FIP4	TGAGGTAGTAGGTTGTGTGGTT#CCACATTGCCCACTGCCTCC#.((((((((.(((.((((((..#)))))).))).)))))))).	7530	7550	1.0	-26.7	1	0.3491057	0.471	0.7542975125	0.72285958	-5.892671223205703	17	20	8	3UTR	MIRT501440	1	1
hsa-let-7b-5p	NM_032932	RAB11FIP4	TGAGGTAGTAGGTTGTGTGGTT#TCACTCGAGCTGCTGACCTCAA#(((((((((((.(((.((((..#)))).))).)))))).))))).	4836	4858	1.0	-23.6	1	0.002993751	0.412	-0.28262770833333334	-0.04626857874999997	-7.517426836101634	18	22	6	3UTR	MIRT501440	1	1
hsa-let-7b-5p	NM_033016	PDGFB	TGAGGTAGTAGGTTGTGTGGTT#CCACATGACCTCCATTTCCCAAAGTCCTCTGCTCCAGCAACTGCCC#...(((((((((((((((((..#)))))))))))............................)))))).	1941	1987	1.0	-21.3	0	0.005443633	0.412	0.0	0.0	-6.514540193678739	17	46	11	3UTR	MIRT760986	1	1
hsa-let-7b-5p	NM_033360	KRAS	TGAGGTAGTAGGTTGTGTGGTT#AACCATAAGATTTACTGCTGCT#.(.(((((((((((.(((((((#))))))).))))))))))).).	2759	2781	1.0	-19.6	0	0.03514158	0.603	0.2393483727272728	0.80540000625	-6.086313871914201	19	22	11	3UTR	MIRT000411	0	0
hsa-let-7b-5p	NM_053056	CCND1	TGAGGTAGTAGGTTGTGTGGTT#ACACACACAAACCTTCTGCCTTT#.(((((((.((((((((((((.#)).))))))).))).))))))).	2559	2582	1.0	-23.7	1	0.05058624	0.647	-0.04872144285714287	0.8178222549999998	-4.849714495602881	19	23	7	3UTR	MIRT002484	1	1
hsa-let-7b-5p	NM_058241	CCNT2	TGAGGTAGTAGGTTGTGTGGTT#GCACAGCCAGTTTTTACCTCT#.(((((((..((((((((....#)))))))).....))))))).	6367	6388	1.0	-20.5	1	0.003108924	0.588	0.47204053125	-0.038631471250000035	-6.09222096393106	15	21	8	3UTR	MIRT548970	1	1
hsa-let-7b-5p	NM_080659	C11orf52	TGAGGTAGTAGGTTGTGTGGTT#GGAGAACCTACTGCTTTG#.(((((((((((((.(.(....#).).))))))))))))).	480	498	1.0	-19.4	1	0.001318981	0.456	0.003028207692307682	0.05428474125000003	-4.528774397607753	15	18	13	3UTR	MIRT052335	0	0
hsa-let-7b-5p	NM_080660	ZC3HAV1L	TGAGGTAGTAGGTTGTGTGGTT#GGCTCAAGCGATCTGCCTGCTTCAG#((((((((((((((((.(((((#))).)).))))))))).))))))).	1550	1575	1.0	-21.1	1	0.001417469	0.441	0.33659215294117645	0.15699382749999996	-3.937574446201665	21	25	9	3UTR	MIRT463422	1	0
hsa-let-7b-5p	NM_130798	SNAP23	TGAGGTAGTAGGTTGTGTGGTT#ACCACATGAATTCAGATTTACCTCAA#((((((((....(((((((((.#)))))))))........)))))))).	1757	1783	1.0	-19.0	1	0.01454127	0.706	0.0016851111111111125	0.007566894999999959	-12.408048357782313	17	26	9	3UTR	MIRT001590	1	1
hsa-let-7b-5p	NM_133496	SLC30A7	TGAGGTAGTAGGTTGTGTGGTT#AGCTCACTGCAACCTCTGCTTCC#.(((((((.(((((((((((((#))).))).)))))))))))))).	2043	2066	1.0	-23.1	1	0.0009181032	0.441	0.040745106666666656	0.19766443000000006	-4.849714495602881	20	23	14	3UTR	MIRT032430	1	0
hsa-let-7b-5p	NM_133496	SLC30A7	TGAGGTAGTAGGTTGTGTGGTT#ACCCTACAACACTTTACCTCC#.(((((((.((((((((.(((.#))).)))))).))))))))).	7848	7869	1.0	-20.0	1	0.6939783	0.632	0.4594541777777777	0.507624634125	-4.849714495602881	18	21	9	3UTR	MIRT032430	1	0
hsa-let-7b-5p	NM_138285	NUP35	TGAGGTAGTAGGTTGTGTGGTT#ATACAACCTATTTGTAGCTCG#.(((.(((((((((((((....#)))))))))))...)).))).	1137	1158	1.0	-18.5	0	0.01298515	0.676	1.062351865625	0.9881664006249997	-7.91236201216959	16	21	11	3UTR	MIRT032327	0	0
hsa-let-7b-5p	NM_138444	KCTD12	TGAGGTAGTAGGTTGTGTGGTT#TATGGGACCTACTGCTTCT#.(((((((((((((.((((...#)))).))))))))))))).	4826	4845	1.0	-23.3	1	0.004418192	0.647	0.12106329230769228	0.13240238875	-4.528774397607753	17	19	13	3UTR	MIRT032456	0	0
hsa-let-7b-5p	NM_138962	MSI2	TGAGGTAGTAGGTTGTGTGGTT#TACCAGCCTATTAACCTCT#.((((((((((((((.(((...#))))))))))))).)))).	2277	2296	1.0	-21.5	1	0.02729675	0.603	3.597907466666667	2.55033530375	-4.026373917660731	17	19	13	3UTR	MIRT547371	1	1
hsa-let-7b-5p	NM_144618	GABPB2	TGAGGTAGTAGGTTGTGTGGTT#GCCTACACTTCCTCTGCCCAG#((.(((((.(((..(((((((.#))).))))..)))))))))).	4642	4663	1.0	-21.5	0	0.07665198	0.515	0.04606875000000001	0.1901744475	-8.697474108940526	17	21	10	3UTR	MIRT052267	0	0
hsa-let-7b-5p	NM_144628	TBC1D20	TGAGGTAGTAGGTTGTGTGGTT#GACTACAGGCACCTGCTACCA#...(((((((((((.(((((((#))))))).).)))))))))).	2930	2951	1.0	-26.0	0	0.0001885957	0.515	-0.19765321749999995	0.015404481625000022	-7.249989753929374	18	21	10	3UTR	MIRT052174	0	0
hsa-let-7b-5p	NM_144628	TBC1D20	TGAGGTAGTAGGTTGTGTGGTT#TCAGGCAATTCTCGCTGCCTCAG#((((((((((((((((.(((..#))).))))).)).))))))))).	2891	2914	1.0	-22.5	1	0.0004186188	0.368	-0.5397149122222221	0.009773474625	-3.937574446201665	19	23	9	3UTR	MIRT052174	0	0
hsa-let-7b-5p	NM_145168	SDR42E1	TGAGGTAGTAGGTTGTGTGGTT#AGCCACCCAGCACTGCTACCTCAC#(((((((((((((((.((((((#)))))).)))).))))))))))).	5162	5186	1.0	-31.3	1	0.03836324	0.397	-0.3058366875000001	-0.3223994124999999	-4.1706235265052785	21	24	11	3UTR	MIRT499656	0	1
hsa-let-7b-5p	NM_145690	YWHAZ	TGAGGTAGTAGGTTGTGTGGTT#GGCCGCATGATCTTTCTGGCTCC#.(((.(((.(((((((((((((#)))))))))))))..))).))).	2384	2407	1.0	-22.7	0	0.02389094	0.5	1.7485585000000003	1.2185516247500003	-8.968751670415353	19	23	13	3UTR	MIRT052271	0	0
hsa-let-7b-5p	NM_145899	HMGA1	TGAGGTAGTAGGTTGTGTGGTT#AGCCGCACCCTGCACCTGCTGCGTCC#.((.(((((((((.((((((((#)))))))).....))))))))).)).	866	892	1.0	-26.2	0	0.003400331	0.382	0.16314822222222217	0.20255459250000002	-7.682187029836714	19	26	9	3UTR	MIRT001625	1	1
hsa-let-7b-5p	NM_145901	HMGA1	TGAGGTAGTAGGTTGTGTGGTT#AGCCGCACCCTGCACCTGCTGCGTCC#.((.(((((((((.((((((((#)))))))).....))))))))).)).	1106	1132	1.0	-26.2	0	0.003400331	0.382	0.16314822222222217	0.20255459250000002	-7.682187029836714	19	26	9	3UTR	MIRT001625	1	1
hsa-let-7b-5p	NM_145903	HMGA1	TGAGGTAGTAGGTTGTGTGGTT#AGCCGCACCCTGCACCTGCTGCGTCC#.((.(((((((((.((((((((#)))))))).....))))))))).)).	719	745	1.0	-26.2	0	0.003400331	0.382	0.16314822222222217	0.20255459250000002	-7.682187029836714	19	26	9	3UTR	MIRT001625	1	1
hsa-let-7b-5p	NM_145905	HMGA1	TGAGGTAGTAGGTTGTGTGGTT#AGCCGCACCCTGCACCTGCTGCGTCC#.((.(((((((((.((((((((#)))))))).....))))))))).)).	795	821	1.0	-26.2	0	0.003400331	0.382	0.16314822222222217	0.20255459250000002	-7.682187029836714	19	26	9	3UTR	MIRT001625	1	1
hsa-let-7b-5p	NM_001291978	NOP14	TGAGGTAGTAGGTTGTGTGGTT#GCTCTTGTTGCCCAGGCTGGAGTGCAATGGCACAACCTCCACCTCCTGGGTTCAAGCGATTCTCCTGCCTCAG#((((((((.(((((((((.(((#.))).)))))))))..........................)))))))).	3000	3073	1.0	-24.6	1	0.02200267	0.426	2.048126555555556	3.8404088049999996	-4.993964104447428	20	49	9	3UTR	MIRT032426	0	0
hsa-let-7b-5p	NM_001300800	NAA40	TGAGGTAGTAGGTTGTGTGGTT#GCCTCACCCTGCTGGCTCC#.(((.(((((((..(((.(((.#))).)))))))))).))).	2627	2646	1.0	-21.6	0	0.0007819619	0.412	-0.0077662857142856935	0.10066308375000022	-10.05833254235624	16	19	10	3UTR	MIRT005239	0	0
hsa-let-7b-5p	NM_001300842	SLC10A7	TGAGGTAGTAGGTTGTGTGGTT#GGCCAAAAGCAGCCTGTTACATCC#.((.((((((((((((.(((((#)))))...)))))))))))).)).	2284	2308	1.0	-19.0	0	0.01213827	0.544	1.2908758333333334	0.92696835875	-6.825347112316308	19	24	12	3UTR	MIRT501174	1	1
hsa-let-7b-5p	NM_001301136	NUSAP1	TGAGGTAGTAGGTTGTGTGGTT#AGCTACATAGCCCTATCG#...(((((..((((((((((((#))))))))))))))))).	2029	2047	1.0	-19.6	0	0.009379432	0.662	0.2455674333333334	0.21871958875000003	-8.81343632025268	17	18	17	3UTR	MIRT052111	0	0
hsa-let-7b-5p	NM_001303542	RAB11FIP4	TGAGGTAGTAGGTTGTGTGGTT#GATTTTCCACATTGCCCACTGCCTCC#.((((((((.(((.((((((..#.)))))).))).)))))))).	7175	7201	1.0	-26.8	1	0.3491057	0.471	0.3541808875	0.820030595	-5.892671223205703	17	21	8	3UTR	MIRT501440	1	1
hsa-let-7b-5p	NM_001303542	RAB11FIP4	TGAGGTAGTAGGTTGTGTGGTT#TCACTCGAGCTGCTGACCTCAA#(((((((((((.(((.((((..#)))).))).)))))).))))).	4487	4509	1.0	-23.6	1	0.002993751	0.412	-0.28262770833333334	-0.04626857874999997	-7.517426836101634	18	22	6	3UTR	MIRT501440	1	1
hsa-let-7b-5p	NM_001304536	EPHA4	TGAGGTAGTAGGTTGTGTGGTT#CCAGCCAACTTACTGCCA#...((((((((((((..(((..#)))..)))))))))))).	5431	5449	1.0	-23.6	0	0.06620635	0.603	3.3708398583333334	5.0147869075	-6.747589273982352	15	18	12	3UTR	MIRT548343	1	1
hsa-let-7b-5p	NM_001304797	CCDC134	TGAGGTAGTAGGTTGTGTGGTT#AGCTCACTGCAGCCTCTATCTCC#.(((((((.(((((((((((((#))).))).)))))))))))))).	5897	5920	1.0	-23.2	1	0.0004273322	0.426	-0.8060004	-0.21095338749999995	-4.849714495602881	20	23	14	3UTR	MIRT032346	0	0
hsa-let-7b-5p	NM_001304797	CCDC134	TGAGGTAGTAGGTTGTGTGGTT#GCCAGCAGCTCCTCCTGCCTCGA#((((((((.(((...((((((.#)))).))...))).)))))))).	6197	6220	1.0	-22.1	1	0.0005276643	0.412	0.14988058999999998	-0.11798286700000005	-7.875384194884712	17	23	8	3UTR	MIRT032346	0	0
hsa-let-7b-5p	NM_001305563	TXNL4A	TGAGGTAGTAGGTTGTGTGGTT#ATTACACTCCTGCTATTTCT#.(((((((((((..(((((((.#))))))).))))))))))).	2216	2236	1.0	-21.9	1	0.009033905	0.529	-0.13137683636363637	-0.1190058175	-5.9392953675437665	18	20	11	3UTR	MIRT052139	0	0
hsa-let-7b-5p	NM_001305564	TXNL4A	TGAGGTAGTAGGTTGTGTGGTT#ATTACACTCCTGCTATTTCT#.(((((((((((..(((((((.#))))))).))))))))))).	2159	2179	1.0	-21.9	1	0.009033905	0.529	-0.34421829090909095	-0.06925400499999997	-5.9392953675437665	18	20	11	3UTR	MIRT052139	0	0
hsa-let-7b-5p	NM_001306093	PTGR3	TGAGGTAGTAGGTTGTGTGGTT#GGCCACCCGACTTGTACCTGGG#(.(((((.(((((((.((((((#)))))).)))))))))))).).	4531	4553	1.0	-21.5	0	0.0002761801	0.529	0.8923451428571428	1.846001035	-7.64793433770108	19	22	12	3UTR	MIRT032369	0	0
hsa-let-7b-5p	NM_001306195	ARPP19	TGAGGTAGTAGGTTGTGTGGTT#GCGATCTTGGCTCACTGCAACCTCTGCCTCC#.(((((((.(((((((((((((#.))).))).)))))))))))))).	3945	3976	1.0	-25.9	1	0.001671981	0.397	1.33826832	1.5175669850000002	-4.849714495602881	20	24	14	3UTR	MIRT051971	1	1
hsa-let-7b-5p	NM_001306196	ARPP19	TGAGGTAGTAGGTTGTGTGGTT#GCGATCTTGGCTCACTGCAACCTCTGCCTCC#.(((((((.(((((((((((((#.))).))).)))))))))))))).	4024	4055	1.0	-25.9	1	0.001671981	0.397	1.2686893199999998	1.6272088499999997	-4.849714495602881	20	24	14	3UTR	MIRT051971	1	1
hsa-let-7b-5p	NM_001308002	MEF2C	TGAGGTAGTAGGTTGTGTGGTT#AGCCACATATCTTCTACATCAA#(((.((((.(((.(((((((((#))))))))).))))))).))).	5579	5601	1.0	-20.3	0	0.1611524	0.676	6.578140666666668	5.510149337499998	-9.315116992072863	19	22	9	3UTR	MIRT052262	1	1
hsa-let-7b-5p	NM_001308192	CPEB4	TGAGGTAGTAGGTTGTGTGGTT#ACCTGCTGCCTG#..(((((((((((.........#))))))))))).	5567	5579	1.0	-18.3	1	0.005457422	0.529	0.2578128727272727	-0.17393139000000002	-6.782339277446944	11	12	11	3UTR	MIRT054125	1	0
hsa-let-7b-5p	NM_001308193	CPEB4	TGAGGTAGTAGGTTGTGTGGTT#ACCTGCTGCCTG#..(((((((((((.........#))))))))))).	5516	5528	1.0	-18.3	1	0.005457422	0.529	0.2578128727272727	-0.17393139000000002	-6.782339277446944	11	12	11	3UTR	MIRT054125	1	0
hsa-let-7b-5p	NM_001314007	DIAPH1	TGAGGTAGTAGGTTGTGTGGTT#ACCACCCTGACCCTGTCTTTCTCTCTGGCCTGCTGCTCTCT#.((((((((((((((.(((((.#))))))....................)))))))))).))).	4065	4106	1.0	-21.3	1	0.04138898	0.441	2.034553134285714	1.9524737392499998	-4.026373917660731	19	41	10	3UTR	MIRT032344	0	0
hsa-let-7b-5p	NM_001317816	SLC10A7	TGAGGTAGTAGGTTGTGTGGTT#GGCCAAAAGCAGCCTGTTACATCC#.((.((((((((((((.(((((#)))))...)))))))))))).)).	2134	2158	1.0	-19.0	0	0.01213827	0.544	0.9053106166666666	0.96675761125	-6.825347112316308	19	24	12	3UTR	MIRT501174	1	1
hsa-let-7b-5p	NM_001317818	SLC10A7	TGAGGTAGTAGGTTGTGTGGTT#AACCACTTCTAAAGCCTGCTAATTTCAT#((((((((((((((..((((((#))))))......))))))))).))))).	717	745	1.0	-21.0	1	0.03635643	0.647	0.40910766666666665	0.3750591924999999	-4.906073086755913	20	28	9	3UTR	MIRT501174	1	1
hsa-let-7b-5p	NM_001317818	SLC10A7	TGAGGTAGTAGGTTGTGTGGTT#AGCCATATAACTTAAGATGTCC#.((.((..((((((((((((((#))))))))))))))..)).)).	670	692	1.0	-19.8	0	0.03106904	0.735	0.49894444285714284	0.42921623750000004	-10.682668576368258	18	22	14	3UTR	MIRT501174	1	1
hsa-let-7b-5p	NM_001318008	TLCD3A	TGAGGTAGTAGGTTGTGTGGTT#GGCTAAATGCTCCTGGGAGTCAGGCGCAGCCTCACACCAGCTGCCTCC#.((((((((.((.((((.((((#.)))).)))))).)))))))).	522	570	1.0	-24.8	1	0.003803629	0.412	1.137196525	2.5462923425	-6.32496191835154	18	22	8	3UTR	MIRT052244	0	0
hsa-let-7b-5p	NM_001318136	ZNF3	TGAGGTAGTAGGTTGTGTGGTT#AGCCACACACCCATTTTCCTCAC#(((((.(((.((.(((((((((#))))))))))).)))..))))).	1658	1681	1.0	-22.7	0	0.05465086	0.5	0.0	0.0	-8.370170288389133	19	23	11	3UTR	MIRT052240	0	0
hsa-let-7b-5p	NM_001319080	HMGA1	TGAGGTAGTAGGTTGTGTGGTT#AGCCGCACCCTGCACCTGCTGCGTCC#.((.(((((((((.((((((((#)))))))).....))))))))).)).	863	889	1.0	-26.2	0	0.003400331	0.382	0.16314822222222217	0.20255459250000002	-7.682187029836714	19	26	9	3UTR	MIRT001625	1	1
hsa-let-7b-5p	NM_001321367	CD99	TGAGGTAGTAGGTTGTGTGGTT#GGCCACAGATTCGATGAGCTTCTGCTGCTTCC#.(((((((((((...(((((((#))))))).............))))))))))).	3521	3553	1.0	-20.9	1	0.0005371374	0.5	-0.8009308181818183	-0.15201420000000002	-6.674744927794402	18	32	11	3UTR	MIRT051929	0	0
hsa-let-7b-5p	NM_001322250	MSI2	TGAGGTAGTAGGTTGTGTGGTT#TACCAGCCTATTAACCTCT#.((((((((((((((.(((...#))))))))))))).)))).	2180	2199	1.0	-21.5	1	0.02729675	0.603	3.597907466666667	2.55033530375	-4.026373917660731	17	19	13	3UTR	MIRT547371	1	1
hsa-let-7b-5p	NM_001322814	SOD2	TGAGGTAGTAGGTTGTGTGGTT#AGGCACACAACTTATATCCTTT#.((((..((((((((((((.((#)).))))))))))))..)))).	12603	12625	1.0	-21.9	0	0.09515007	0.647	0.22147216666666666	0.07775876375000004	-7.2379701334214825	18	22	12	3UTR	MIRT525730	0	0
hsa-let-7b-5p	NM_001323909	GABPB2	TGAGGTAGTAGGTTGTGTGGTT#GCCTACACTTCCTCTGCCCAG#((.(((((.(((..(((((((.#))).))))..)))))))))).	4528	4549	1.0	-21.5	0	0.07665198	0.515	0.04606875000000001	0.1901744475	-8.697474108940526	17	21	10	3UTR	MIRT052267	0	0
hsa-let-7b-5p	NM_001324375	CUL2	TGAGGTAGTAGGTTGTGTGGTT#ACCACACCCCTCCTCCCTCAA#(((((.((.(((..(((((((.#))))))).))).)).))))).	3432	3453	1.0	-22.6	0	0.9903817	0.603	8.550002857142859	6.821890408749997	-9.040893395827124	17	21	7	3UTR	MIRT052315	0	0
hsa-let-7b-5p	NM_001329237	NEK9	TGAGGTAGTAGGTTGTGTGGTT#GGCGCGATCTCAGCTCACTGCAACCTCTGCCTCC#.(((((((.(((((((((((((#.))).))).)))))))))))))).	7377	7411	1.0	-26.1	1	0.003613861	0.397	0.0	0.0	-4.849714495602881	20	24	14	3UTR	MIRT052110	1	0
hsa-let-7b-5p	NM_001329238	NEK9	TGAGGTAGTAGGTTGTGTGGTT#GGCGCGATCTCAGCTCACTGCAACCTCTGCCTCC#.(((((((.(((((((((((((#.))).))).)))))))))))))).	7139	7173	1.0	-26.1	1	0.003613861	0.397	0.0	0.0	-4.849714495602881	20	24	14	3UTR	MIRT052110	1	0
hsa-let-7b-5p	NM_001329752	FAM136A	TGAGGTAGTAGGTTGTGTGGTT#TCACCAACTTATTACTTGAA#(.(((((((((((((.((((..#))))))))))))))))).).	1991	2011	1.0	-19.7	1	0.1842971	0.676	2.944226476923077	2.77537684625	-5.334299408520449	18	20	17	3UTR	MIRT052030	0	0
hsa-let-7b-5p	NM_001329755	FAM136A	TGAGGTAGTAGGTTGTGTGGTT#TCACCAACTTATTACTTGAA#(.(((((((((((((.((((..#))))))))))))))))).).	2293	2313	1.0	-19.7	1	0.1842971	0.676	0.0	0.0	-5.334299408520449	18	20	17	3UTR	MIRT052030	0	0
hsa-let-7b-5p	NM_001330206	MIEN1	TGAGGTAGTAGGTTGTGTGGTT#TGGCATAGCCAAGGCAAGGAAAATGAGTCCCACAGTAGACCCTGCCTCGT#((((((((..((((.(((((..#.)))))...)))))))))))).	976	1026	1.0	-21.8	1	0.002011126	0.426	0.2135116875	1.2110913000000003	-6.971920133026242	17	22	12	3UTR	MIRT051901	0	0
hsa-let-7b-5p	NM_001330232	NAP1L1	TGAGGTAGTAGGTTGTGTGGTT#AGCCACATTTACAATACCTCAG#(((((((....((.((((((((#))))))))..))..))))))).	2050	2072	1.0	-20.4	1	0.04163324	0.647	2.802261875	0.822122815	-12.231719894886995	17	22	8	3UTR	MIRT712370	1	1
hsa-let-7b-5p	NM_001330308	DPF2	TGAGGTAGTAGGTTGTGTGGTT#GCCGCATAGCCTCACCTCT#.(((((.(.((((((((((((.#)))))))))))))))))).	1725	1744	1.0	-26.3	0	0.04996644	0.382	0.7121694166666668	0.11562879374999999	-6.3934010304742	18	19	18	3UTR	MIRT032431	1	0
hsa-let-7b-5p	NM_001330308	DPF2	TGAGGTAGTAGGTTGTGTGGTT#GGCCACCCACCTGCTCCCCGA#((.((.(((((((.(.((((((#))))))).))))))))).)).	1256	1277	1.0	-20.8	0	0.3407898	0.456	-0.4376250714285715	2.2997880187499993	-8.485961679525179	18	21	9	3UTR	MIRT032431	1	0
hsa-let-7b-5p	NM_000044	AR	TGAGGTAGTAGGTTGTGTGGTT#CCTCTCTGGCTGCTGCCTCAC#(((((((((((.(.(.(.((..#)).).).).))))))))))).	9843	9864	1.0	-21.4	1	0.0001001025	0.441	0.1582766718181818	0.2339775539999999	-8.37426675362204	16	21	11	3UTR	MIRT052016	0	0
hsa-let-7b-5p	NM_000144	FXN	TGAGGTAGTAGGTTGTGTGGTT#CCACTCAGCCTCTGCCTGGA#(.((((((.((((((.((((..#)))).)))))))))))).).	6712	6732	1.0	-25.4	1	0.0001006676	0.456	-0.165787	-0.03754284399999999	-6.390689066766211	17	20	12	3UTR	MIRT454283	0	0
hsa-let-7b-5p	NM_000356	TCOF1	TGAGGTAGTAGGTTGTGTGGTT#CCACCGACCTCTGCCCAC#((.(((((.((((((.((((..#))))))))))))))))).	4351	4369	1.0	-23.0	0	0.1143899	0.426	0.0	0.0	-6.784552659057488	17	18	17	3UTR	MIRT032257	0	0
hsa-let-7b-5p	NM_000456	SUOX	TGAGGTAGTAGGTTGTGTGGTT#AGCCACCTCCACCCCTTTCCCCACCCATTAGCCTCACTGCTTCAG#(((((((((((((((((.(((.#.)))))).))))).))))))))).	1958	2003	1.0	-23.0	1	0.04846667	0.515	0.0	0.0	-3.937574446201665	20	24	9	3UTR	MIRT187714	0	0
hsa-let-7b-5p	NM_000456	SUOX	TGAGGTAGTAGGTTGTGTGGTT#ACCCCACCTCCATTTCTAATGCCTACTGCCATCAA#(((((((((((((...((((..#.)))).......)))))))))).))).	2227	2262	1.0	-21.7	1	0.01373581	0.559	0.0	0.0	-5.762913004276319	17	27	10	3UTR	MIRT187714	0	0
hsa-let-7b-5p	NM_000527	LDLR	TGAGGTAGTAGGTTGTGTGGTT#CACCAGCCTGGTGCCCAT#((.((((.(((((((.(((...#)))))))))).)))))).	3425	3443	1.0	-21.8	0	0.0009899191	0.353	0.0	0.0	-8.041797929992358	16	18	10	3UTR	MIRT032197	0	0
hsa-let-7b-5p	NM_000554	CRX	TGAGGTAGTAGGTTGTGTGGTT#CACACAGCCTAGACCC#...(((..(((((((((((...#))))))))))).))).	3207	3223	1.0	-21.6	0	0.001365925	0.412	0.0	0.0	-10.371861657730689	14	16	11	3UTR	MIRT735593	0	0
hsa-let-7b-5p	NM_000637	GSR	TGAGGTAGTAGGTTGTGTGGTT#GCTATTTCAGCTCACCACAACCTCTGCCTCC#.(((((((.(((((((((((((#.))).))).)))))))))))))).	1994	2025	1.0	-26.5	1	0.006878971	0.441	0.0	0.0	-4.849714495602881	20	24	14	3UTR	MIRT032416	0	0
hsa-let-7b-5p	NM_000701	ATP1A1	TGAGGTAGTAGGTTGTGTGGTT#GGCCACACACTCTGCATCCGACACCCACCCCCTCTTTGTGTACTTCAG#((((((((((((.(((((((((#))))))))).))))).........................))))))).	3369	3417	1.0	-22.2	1	0.01704491	0.471	0.0	0.0	-5.226705058867908	21	48	9	3UTR	MIRT052345	0	0
hsa-let-7b-5p	NM_000761	CYP1A2	TGAGGTAGTAGGTTGTGTGGTT#ATCATCTCAGCTCACTGCAACCTCTGCCTCC#.(((((((.(((((((((((((#.))).))).)))))))))))))).	2703	2734	1.0	-26.1	1	9.267648e-05	0.412	0.0	0.0	-4.849714495602881	20	24	14	3UTR	MIRT052168	0	0
hsa-let-7b-5p	NM_001001343	FNDC9	TGAGGTAGTAGGTTGTGTGGTT#AGCCCCACATCCCTATTCCCTTGCCTACCTCAT#((((((((((((.((((.((((#)))).))))..)))).........)))))))).	1974	2007	1.0	-22.4	1	0.1560449	0.441	0.0	0.0	-5.226705058867908	20	33	8	3UTR	MIRT735596	0	0
hsa-let-7b-5p	NM_001001715	FARP1	TGAGGTAGTAGGTTGTGTGGTT#CTACTAGATTTGGTGCCTCT#.((((((.((((((..((((..#))))..)))))).)))))).	1027	1047	1.0	-19.9	1	0.01747414	0.544	0.0	0.0	-7.075458407091997	16	20	6	3UTR	MIRT005052	1	1
hsa-let-7b-5p	NM_001003828	PARVB	TGAGGTAGTAGGTTGTGTGGTT#AGCTCACTGCAACCTCTGCCTCC#.(((((((.(((((((((((((#))).))).)))))))))))))).	2420	2443	1.0	-25.8	1	0.0007148441	0.412	0.0	0.0	-4.849714495602881	20	23	14	3UTR	MIRT032339	0	0
hsa-let-7b-5p	NM_001004023	DYRK3	TGAGGTAGTAGGTTGTGTGGTT#CCACACAATCTCTGATGTCTTCT#.(((((((.(((((((((((..#))))))))))))))....)))).	6659	6682	1.0	-20.3	1	0.01824846	0.632	0.0	0.0	-4.849714495602881	18	23	14	3UTR	MIRT735595	0	0
hsa-let-7b-5p	NM_001005849	SUMO2	TGAGGTAGTAGGTTGTGTGGTT#ACCACATCCTGACTACTACCG#...((((((((...(((((((.#))))))).....)))))))).	426	447	1.0	-21.5	0	0.09599317	0.603	0.0	0.0	-12.007314033461745	15	21	8	3UTR	MIRT051926	0	0
hsa-let-7b-5p	NM_001006115	IP6K1	TGAGGTAGTAGGTTGTGTGGTT#AGCCCTTAATGGCACAGATCTGCTGCTTCT#.(((((((((((((((((.(((#.))).))))).)))))))))))).	2691	2721	1.0	-25.0	1	0.01753986	0.471	0.0	0.0	-3.793324837357118	20	24	12	3UTR	MIRT051881	0	0
hsa-let-7b-5p	NM_001007237	IGSF3	TGAGGTAGTAGGTTGTGTGGTT#TCACAGAGACAGACTGCCTCT#.((((((((..(((.(((((..#)))))..)))..)))))))).	4477	4498	1.0	-21.5	1	5.910504e-07	0.5	0.0	0.0	-8.596055341346283	16	21	8	3UTR	MIRT032291	0	0
hsa-let-7b-5p	NM_001007269	GEMIN7	TGAGGTAGTAGGTTGTGTGGTT#AACCCTACAGAAATATGGGCCTGCTGCCA#...((((((((((((((.((((#)))).)))).........)))))))))).	754	783	1.0	-21.9	0	0.0003048206	0.426	0.0	0.0	-6.514540193678739	18	29	10	3UTR	MIRT001630	1	0
hsa-let-7b-5p	NM_001007270	GEMIN7	TGAGGTAGTAGGTTGTGTGGTT#AACCCTACAGAAATATGGGCCTGCTGCCA#...((((((((((((((.((((#)))).)))).........)))))))))).	779	808	1.0	-21.9	0	0.0003048206	0.426	0.0	0.0	-6.514540193678739	18	29	10	3UTR	MIRT001630	1	0
hsa-let-7b-5p	NM_001008749	RAB19	TGAGGTAGTAGGTTGTGTGGTT#GGCTCACTGCAACCTCTACCTCC#.(((((((.(((((((((((((#))).))).)))))))))))))).	1597	1620	1.0	-25.7	1	0.01604808	0.456	0.0	0.0	-4.849714495602881	20	23	14	3UTR	MIRT681741	0	0
hsa-let-7b-5p	NM_001010853	PM20D2	TGAGGTAGTAGGTTGTGTGGTT#GGCTCACTGCAACCTCTGCCTCC#.(((((((.(((((((((((((#))).))).)))))))))))))).	1973	1996	1.0	-25.7	1	0.001558105	0.426	0.0	0.0	-4.849714495602881	20	23	14	3UTR	MIRT545390	0	0
hsa-let-7b-5p	NM_001010867	IBA57	TGAGGTAGTAGGTTGTGTGGTT#GCTCACTGCAACCTCTGCCTCC#.(((((((.((((((((((((.#)).))).)))))))))))))).	3130	3152	1.0	-25.3	1	0.0007590177	0.441	0.0	0.0	-4.849714495602881	19	22	14	3UTR	MIRT051887	0	0
hsa-let-7b-5p	NM_001010867	IBA57	TGAGGTAGTAGGTTGTGTGGTT#AGCCCCACTGGCTGCTGCTTTAA#(((((((((((.(.(((.((((#)))).))).).))))))))))).	2613	2636	1.0	-22.3	1	0.000659125	0.485	0.0	0.0	-8.141217673318426	19	23	11	3UTR	MIRT051887	0	0
hsa-let-7b-5p	NM_001010891	MTX3	TGAGGTAGTAGGTTGTGTGGTT#AGCGCAGTCTCGGCTCACTGCAACCTCTACCTCC#.(((((((.(((((((((((((#.))).))).)))))))))))))).	3425	3459	1.0	-26.0	1	0.00175282	0.412	0.0	0.0	-4.849714495602881	20	24	14	3UTR	MIRT682447	0	0
hsa-let-7b-5p	NM_001010989	HERPUD1	TGAGGTAGTAGGTTGTGTGGTT#GCCGTGGCGCGATCTCGGCTCACTGCAACCTCTACCTCC#.(((((((.(((((((((((((#.))).))).)))))))))))))).	2504	2543	1.0	-26.0	1	0.03432611	0.382	0.0	0.0	-4.849714495602881	20	24	14	3UTR	MIRT475736	0	0
hsa-let-7b-5p	NM_001011713	NAA30	TGAGGTAGTAGGTTGTGTGGTT#CCACCAACCACTGCCC#...((((((.(((((.((((..#))))))))))))))).	6032	6048	1.0	-22.5	0	0.02892501	0.515	0.0	0.0	-7.9900957423105305	15	16	15	3UTR	MIRT191401	1	1
hsa-let-7b-5p	NM_001011713	NAA30	TGAGGTAGTAGGTTGTGTGGTT#GCTGAACCTGCTGCCTTT#.(((((((((((((..((....#))..))))))))))))).	7456	7474	1.0	-22.0	1	0.0270755	0.529	0.0	0.0	-4.761823477911366	15	18	13	3UTR	MIRT191401	1	1
hsa-let-7b-5p	NM_001012957	DISC1	TGAGGTAGTAGGTTGTGTGGTT#CCGCAATCTCGGCTCACTGCAACCTCTACCTCC#.(((((((.(((((((((((((#.))).))).)))))))))))))).	5796	5829	1.0	-26.0	1	0.001094966	0.412	0.0	0.0	-4.849714495602881	20	24	14	3UTR	MIRT452946	0	0
hsa-let-7b-5p	NM_001012957	DISC1	TGAGGTAGTAGGTTGTGTGGTT#AGCTATTCTACTGCCTCAG#((((((((((((....((((((#)))))))))))))))))).	5837	5856	1.0	-21.3	1	0.004613248	0.471	0.0	0.0	-7.052043616942562	18	19	18	3UTR	MIRT452946	0	0
hsa-let-7b-5p	NM_001012975	RNASE10	TGAGGTAGTAGGTTGTGTGGTT#GCCCTCAGCCTATTTCCTCT#.((((.(((((((((.(.(((.#)))).))))))))).)))).	1961	1981	1.0	-22.6	0	2.989798e-05	0.603	0.0	0.0	-5.927332678853777	17	20	9	3UTR	MIRT052197	0	0
hsa-let-7b-5p	NM_001017368	RFFL	TGAGGTAGTAGGTTGTGTGGTT#CTACTTACAACCTGCTTTCTCT#.((((.((((((((((((((..#))))..)))))))))).)))).	3394	3416	1.0	-22.5	0	0.1443258	0.485	0.0	0.0	-5.694283598550164	18	22	10	3UTR	MIRT052109	0	0
hsa-let-7b-5p	NM_001024808	BCL7A	TGAGGTAGTAGGTTGTGTGGTT#CCACGGTCACCTGCTGCCC#...((((((((((..(((((..#)))))...)))))))))).	1849	1868	1.0	-23.2	0	0.009978046	0.368	0.0	0.0	-8.10682967144978	15	19	10	3UTR	MIRT002399	1	1
hsa-let-7b-5p	NM_001029859	KCTD21	TGAGGTAGTAGGTTGTGTGGTT#AACAGTAATACATAACCCTACCTACCTCAC#(((((((((((((((((((...#.))))))))).))).))))))).	3296	3326	1.0	-23.6	1	0.03418349	0.618	0.0	0.0	-3.937574446201665	19	23	9	3UTR	MIRT474906	1	1
hsa-let-7b-5p	NM_001030288	SPN	TGAGGTAGTAGGTTGTGTGGTT#AGCCACTGCACCCAGCCACTGCTTCAT#(((((((((.((((((((((((#)))))).)))....)))))))))))).	4761	4788	1.0	-22.9	1	0.001209846	0.426	0.0	0.0	-5.180080914529843	21	27	12	3UTR	MIRT052328	0	0
hsa-let-7b-5p	NM_001031695	RBFOX2	TGAGGTAGTAGGTTGTGTGGTT#GCCACAGAACCTCTCCTCT#.((((.((.(((((.((((((.#)))))).))))))))))).	6296	6315	1.0	-25.2	0	0.2435772	0.441	0.0	0.0	-7.486122817046563	17	19	11	3UTR	MIRT032498	1	1
hsa-let-7b-5p	NM_001031732	YTHDC1	TGAGGTAGTAGGTTGTGTGGTT#GGCAGTGGCATGATCTTGGCTCACTGCAACCTCCTGCCTCAG#((((((((.(((((((((((((#.))).))).))))))).)))))))).	4532	4574	1.0	-27.7	1	1.926084e-06	0.397	0.0	0.0	-4.993964104447428	21	26	8	3UTR	MIRT052150	0	0
hsa-let-7b-5p	NM_001032386	SUOX	TGAGGTAGTAGGTTGTGTGGTT#AGCCACCTCCACCCCTTTCCCCACCCATTAGCCTCACTGCTTCAG#(((((((((((((((((.(((.#.)))))).))))).))))))))).	1832	1877	1.0	-23.0	1	0.04846667	0.515	0.0	0.0	-3.937574446201665	20	24	9	3UTR	MIRT187714	0	0
hsa-let-7b-5p	NM_001032386	SUOX	TGAGGTAGTAGGTTGTGTGGTT#ACCCCACCTCCATTTCTAATGCCTACTGCCATCAA#(((((((((((((...((((..#.)))).......)))))))))).))).	2101	2136	1.0	-21.7	1	0.01373581	0.559	0.0	0.0	-5.762913004276319	17	27	10	3UTR	MIRT187714	0	0
hsa-let-7b-5p	NM_001032387	SUOX	TGAGGTAGTAGGTTGTGTGGTT#AGCCACCTCCACCCCTTTCCCCACCCATTAGCCTCACTGCTTCAG#(((((((((((((((((.(((.#.)))))).))))).))))))))).	1723	1768	1.0	-23.0	1	0.04846667	0.515	0.0	0.0	-3.937574446201665	20	24	9	3UTR	MIRT187714	0	0
hsa-let-7b-5p	NM_001032387	SUOX	TGAGGTAGTAGGTTGTGTGGTT#ACCCCACCTCCATTTCTAATGCCTACTGCCATCAA#(((((((((((((...((((..#.)))).......)))))))))).))).	1992	2027	1.0	-21.7	1	0.01373581	0.559	0.0	0.0	-5.762913004276319	17	27	10	3UTR	MIRT187714	0	0
hsa-let-7b-5p	NM_001033583	ACOT9	TGAGGTAGTAGGTTGTGTGGTT#GGCATGATCTTGGCTCACTGCAACCTCTACCTCC#.(((((((.(((((((((((((#.))).))).)))))))))))))).	3313	3347	1.0	-25.9	1	0.00227228	0.412	0.0	0.0	-4.849714495602881	20	24	14	3UTR	MIRT454857	0	0
hsa-let-7b-5p	NM_001034	RRM2	TGAGGTAGTAGGTTGTGTGGTT#ATGCAGCCTCACTGCTTCAA#((((((((((((((((((....#))))))))).))))))))).	1552	1572	1.0	-23.1	1	0.001472693	0.632	0.0	0.0	-3.937574446201665	18	20	9	3UTR	MIRT005050	1	1
hsa-let-7b-5p	NM_001037171	ACOT9	TGAGGTAGTAGGTTGTGTGGTT#GGCATGATCTTGGCTCACTGCAACCTCTACCTCC#.(((((((.(((((((((((((#.))).))).)))))))))))))).	3340	3374	1.0	-25.9	1	0.00227228	0.412	0.0	0.0	-4.849714495602881	20	24	14	3UTR	MIRT454857	0	0
hsa-let-7b-5p	NM_001037277	GGPS1	TGAGGTAGTAGGTTGTGTGGTT#GCCACCAACTCTATCCTACTACCATCAA#(((((((((((((((.(((((.#))))))))......))))))))).))).	1241	1269	1.0	-24.1	1	0.6604063	0.618	-0.03741883545454542	0.51299324975	-4.1706235265052785	20	28	9	3UTR	MIRT052321	0	0
hsa-let-7b-5p	NM_001037334	USP14	TGAGGTAGTAGGTTGTGTGGTT#ACTGCACACCTATTACCTA#..((((((((((.((((((((.#)))))))))))))))))).	1875	1894	1.0	-25.0	1	0.1551819	0.603	0.0	0.0	-6.246131332038532	18	19	18	3UTR	MIRT052341	0	0
hsa-let-7b-5p	NM_001037334	USP14	TGAGGTAGTAGGTTGTGTGGTT#AGCCACCCATCCTTTGCCTTAT#((((((((.(((.((.((((((#)))))).)).))))))))))).	1933	1955	1.0	-21.6	1	0.5814599	0.574	0.0	0.0	-6.516143797417284	19	22	11	3UTR	MIRT052341	0	0
hsa-let-7b-5p	NM_001039999	FAM83G	TGAGGTAGTAGGTTGTGTGGTT#AGCCTTTTCCAAGTGGGACATGGAAGAGGCAGCCTGCTGCCTGGA#(.((((((((((((((.(....#.).)))))))))))))).).	3801	3846	1.0	-25.9	1	1.006406e-05	0.412	0.0	0.0	-5.101250328216836	16	20	14	3UTR	MIRT476977	1	0
hsa-let-7c-5p	NM_018195	NKAPD1	TGAGGTAGTAGGTTGTATGGTT#TCATACAACCTGGAATTTCT#.(((((..((((((((((((..#))))))))))))..))))).	3634	3654	0.9538461538461539	-20.1	0	0.04421236	0.721	1.0568039999999999	1.4645801025806455	-7.650646301409068	17	20	12	3UTR	MIRT264692	1	0
hsa-let-7c-5p	NM_001082970	NKAPD1	TGAGGTAGTAGGTTGTATGGTT#TCATACAACCTGGAATTTCT#.(((((..((((((((((((..#))))))))))))..))))).	3631	3651	0.9538461538461539	-20.1	0	0.04421236	0.721	1.0568039999999999	1.4645801025806455	-7.650646301409068	17	20	12	3UTR	MIRT264692	1	0
hsa-let-7c-5p	NM_001301017	NKAPD1	TGAGGTAGTAGGTTGTATGGTT#TCATACAACCTGGAATTTCT#.(((((..((((((((((((..#))))))))))))..))))).	3073	3093	0.9538461538461539	-20.1	0	0.04421236	0.721	1.0568039999999999	1.4645801025806455	-7.650646301409068	17	20	12	3UTR	MIRT264692	1	0
hsa-let-7c-5p	NM_001301019	NKAPD1	TGAGGTAGTAGGTTGTATGGTT#TCATACAACCTGGAATTTCT#.(((((..((((((((((((..#))))))))))))..))))).	3117	3137	0.9538461538461539	-20.1	0	0.04421236	0.721	1.0568039999999999	1.4645801025806455	-7.650646301409068	17	20	12	3UTR	MIRT264692	1	0
hsa-let-7c-5p	NM_006391	IPO7	TGAGGTAGTAGGTTGTATGGTT#GATCATGCAACCTGGCACTG#...(((..((((((((((((((#))))))))))))))..))).	3375	3395	0.9615384615384616	-20.4	0	0.001053618	0.456	3.596802142857143	1.91132359	-10.371861657730689	17	20	14	3UTR	MIRT051784	0	0
hsa-let-7c-5p	NM_002657	PLAGL2	TGAGGTAGTAGGTTGTATGGTT#ACCATGATAACCTAGTGCCTCC#.((((((.(((((((((((((.#))))).)))))))).)))))).	5210	5232	0.9615384615384616	-26.7	1	0.01134484	0.515	4.922046285714286	4.997180049999999	-6.106959766537749	19	22	8	3UTR	MIRT485299	1	1
hsa-let-7c-5p	NM_003074	SMARCC1	TGAGGTAGTAGGTTGTATGGTT#CCTAGGCCTGCTGGCTCT#.(((.(((((((((....((..#))..))))))))).))).	4145	4163	0.9615384615384616	-19.6	0	2.1824e-06	0.5	0.7341939888888889	1.3369949050000007	-8.880860652723838	14	18	9	3UTR	MIRT051857	1	1
hsa-let-7c-5p	NM_001135700	YWHAZ	TGAGGTAGTAGGTTGTATGGTT#AGCCAATTTGGAAGCTGCTATCTTAG#(((((((((((.((.(((((((#)))))...)).)).))))))))))).	4361	4387	0.9615384615384616	-20.3	1	0.0007310466	0.632	5.9691185454545455	5.418966687499999	-8.019827316048655	20	26	11	3UTR	MIRT463664	0	0
hsa-let-7c-5p	NM_001135701	YWHAZ	TGAGGTAGTAGGTTGTATGGTT#AGCCAATTTGGAAGCTGCTATCTTAG#(((((((((((.((.(((((((#)))))...)).)).))))))))))).	4410	4436	0.9615384615384616	-20.3	1	0.0007310466	0.632	6.418078345454545	5.455815123750001	-8.019827316048655	20	26	11	3UTR	MIRT463664	0	0
hsa-let-7c-5p	NM_001135702	YWHAZ	TGAGGTAGTAGGTTGTATGGTT#AGCCAATTTGGAAGCTGCTATCTTAG#(((((((((((.((.(((((((#)))))...)).)).))))))))))).	4449	4475	0.9615384615384616	-20.3	1	0.0007310466	0.632	5.217369363636364	4.95047274125	-8.019827316048655	20	26	11	3UTR	MIRT463664	0	0
hsa-let-7c-5p	NM_138578	BCL2L1	TGAGGTAGTAGGTTGTATGGTT#TATGGCCTCAGCTGCCTCAC#(((((((((((((((((.....#))))))))..))))))))).	1885	1905	0.9615384615384616	-21.0	1	0.00189519	0.456	3.4428919999999996	3.96871403	-3.937574446201665	17	20	9	3UTR	MIRT004491	1	1
hsa-let-7c-5p	NM_145690	YWHAZ	TGAGGTAGTAGGTTGTATGGTT#AGCCAATTTGGAAGCTGCTATCTTAG#(((((((((((.((.(((((((#)))))...)).)).))))))))))).	4375	4401	0.9615384615384616	-20.3	1	0.0007310466	0.632	6.344992372727273	5.37541908375	-8.019827316048655	20	26	11	3UTR	MIRT463664	0	0
hsa-let-7c-5p	NM_001317919	BCL2L1	TGAGGTAGTAGGTTGTATGGTT#TATGGCCTCAGCTGCCTCAC#(((((((((((((((((.....#))))))))..))))))))).	1867	1887	0.9615384615384616	-21.0	1	0.00189519	0.456	4.673832631578947	4.299575592499998	-3.937574446201665	17	20	9	3UTR	MIRT004491	1	1
hsa-let-7c-5p	NM_001317921	BCL2L1	TGAGGTAGTAGGTTGTATGGTT#TATGGCCTCAGCTGCCTCAC#(((((((((((((((((.....#))))))))..))))))))).	1845	1865	0.9615384615384616	-21.0	1	0.00189519	0.456	5.683647947368421	4.730220525000001	-3.937574446201665	17	20	9	3UTR	MIRT004491	1	1
hsa-let-7c-5p	NM_001322239	BCL2L1	TGAGGTAGTAGGTTGTATGGTT#TATGGCCTCAGCTGCCTCAC#(((((((((((((((((.....#))))))))..))))))))).	1734	1754	0.9615384615384616	-21.0	1	0.00189519	0.456	5.351957473684211	5.085590517499999	-3.937574446201665	17	20	9	3UTR	MIRT004491	1	1
hsa-let-7c-5p	NM_001322240	BCL2L1	TGAGGTAGTAGGTTGTATGGTT#TATGGCCTCAGCTGCCTCAC#(((((((((((((((((.....#))))))))..))))))))).	1863	1883	0.9615384615384616	-21.0	1	0.00189519	0.456	4.998152684210527	4.320582817499998	-3.937574446201665	17	20	9	3UTR	MIRT004491	1	1
hsa-let-7c-5p	NM_001322242	BCL2L1	TGAGGTAGTAGGTTGTATGGTT#TATGGCCTCAGCTGCCTCAC#(((((((((((((((((.....#))))))))..))))))))).	1700	1720	0.9615384615384616	-21.0	1	0.00189519	0.456	3.936742352631578	5.3796898987500015	-3.937574446201665	17	20	9	3UTR	MIRT004491	1	1
hsa-let-7c-5p	NM_181425	FXN	TGAGGTAGTAGGTTGTATGGTT#CCACTCAGCCTCTGCCTGGA#(.((((((.((((((..(((..#)))..)))))))))))).).	6720	6740	0.9743589743589743	-22.2	1	0.0001006676	0.456	0.0	0.0	-6.390689066766211	16	20	12	3UTR	MIRT454282	0	0
hsa-let-7c-5p	NM_199076	CNNM2	TGAGGTAGTAGGTTGTATGGTT#ATGCCAGCTGCTGCCTCT#.((((((((((.(.((((....#)))).).)))))))))).	5117	5135	0.9743589743589743	-21.1	1	1.4105e-06	0.456	0.0	0.0	-7.996968064473879	15	18	10	3UTR	MIRT439168	1	0
hsa-let-7c-5p	NM_004060	CCNG1	TGAGGTAGTAGGTTGTATGGTT#GACATTTGTATCTACGATAAAAATTTTTATACAGAACCTACTGCCTCAA#((((((((((((((((((((..#.)))))))..))))))))))))).	1773	1822	0.9743589743589743	-27.3	1	0.1233343	0.676	3.4474850772727277	2.862493080000001	-3.937574446201665	20	24	13	3UTR	MIRT051874	0	0
hsa-let-7c-5p	NM_032833	PPP1R15B	TGAGGTAGTAGGTTGTATGGTT#GCTTACAGGGTTACTACCTCAG#(((((((((((.(((((.(((.#))))))))..))))))))))).	3967	3989	0.9743589743589743	-20.4	1	0.0008107147	0.676	1.3851835454545454	1.1006836775000002	-7.284377755798021	19	22	11	3UTR	MIRT470419	1	1
hsa-let-7c-5p	NM_000144	FXN	TGAGGTAGTAGGTTGTATGGTT#CCACTCAGCCTCTGCCTGGA#(.((((((.((((((..(((..#)))..)))))))))))).).	6712	6732	0.9743589743589743	-22.2	1	0.0001006676	0.456	-0.165787	-0.03754284399999999	-6.390689066766211	16	20	12	3UTR	MIRT454282	0	0
hsa-let-7c-5p	NM_001330470	MTUS1	TGAGGTAGTAGGTTGTATGGTT#CCAAAACTTATTACCTCC#.(((((((((((((...(((..#))).))))))))))))).	2602	2620	1.0	-19.4	1	0.1149331	0.603	3.260968615384616	2.219084483625	-4.761823477911366	16	18	13	3UTR	MIRT472736	1	1
hsa-let-7c-5p	NM_001346413	PCF11	TGAGGTAGTAGGTTGTATGGTT#AGCTATCATTTGGTTAATAAATACATTTTAGTATTTGCATTTCCTACTGCCTGCAG#((((((((((((.((((.....#.))))...)))))))))).)).	5493	5549	1.0	-19.7	1	0.001647603	0.632	0.02097960769230769	-0.04381983624999998	-5.226705058867908	16	22	10	3UTR	MIRT051836	0	0
hsa-let-7c-5p	NM_001354870	MYC	TGAGGTAGTAGGTTGTATGGTT#GATCAAATGCAACCTCACAACCTTG#.(((((.(((((((((((((((#)))))..)))))))).)).))))).	2596	2621	1.0	-19.7	0	0.0003261468	0.588	2.337732803333333	1.10126489225	-5.337011372228436	20	25	8	3UTR	MIRT003748	0	0
hsa-let-7c-5p	NM_001362770	CSNK2A1	TGAGGTAGTAGGTTGTATGGTT#GGCAGGCCAGCCTGCACCCTCAG#(((((..((((((((.......#.))))))))..))))).	2372	2395	1.0	-20.1	0	0.0001082754	0.426	0.0	0.0	-7.615268822569644	13	17	8	3UTR	MIRT051854	1	0
hsa-let-7c-5p	NM_001362771	CSNK2A1	TGAGGTAGTAGGTTGTATGGTT#GGCAGGCCAGCCTGCACCCTCAG#(((((..((((((((.......#.))))))))..))))).	2255	2278	1.0	-20.1	0	0.0001082754	0.426	0.0	0.0	-7.615268822569644	13	17	8	3UTR	MIRT051854	1	0
hsa-let-7c-5p	NM_001363059	MTUS1	TGAGGTAGTAGGTTGTATGGTT#ACCATCCAGAGCCACAAAAGCAAACCTTCTACCTCC#.(((((((.(((((((.(((((#.))))).....)))).))).))))))).	4996	5032	1.0	-20.8	1	0.302939	0.544	0.0	0.0	-4.849714495602881	19	28	7	3UTR	MIRT472736	1	1
hsa-let-7c-5p	NM_001363059	MTUS1	TGAGGTAGTAGGTTGTATGGTT#CCAAAACTTATTACCTCC#.(((((((((((((...(((..#))).))))))))))))).	5411	5429	1.0	-19.4	1	0.1149331	0.603	0.0	0.0	-4.761823477911366	16	18	13	3UTR	MIRT472736	1	1
hsa-let-7c-5p	NM_001363062	MTUS1	TGAGGTAGTAGGTTGTATGGTT#ACCATCCAGAGCCACAAAAGCAAACCTTCTACCTCC#.(((((((.(((((((.(((((#.))))).....)))).))).))))))).	4834	4870	1.0	-20.8	1	0.302939	0.544	0.0	0.0	-4.849714495602881	19	28	7	3UTR	MIRT472736	1	1
hsa-let-7c-5p	NM_001363062	MTUS1	TGAGGTAGTAGGTTGTATGGTT#CCAAAACTTATTACCTCC#.(((((((((((((...(((..#))).))))))))))))).	5249	5267	1.0	-19.4	1	0.1149331	0.603	0.0	0.0	-4.761823477911366	16	18	13	3UTR	MIRT472736	1	1
hsa-let-7c-5p	NM_001363748	EPHA4	TGAGGTAGTAGGTTGTATGGTT#CCAGCCAACTTACTGCCA#...((((((((((((..(((..#)))..)))))))))))).	5241	5259	1.0	-22.5	0	0.06620635	0.603	0.0	0.0	-6.747589273982352	15	18	12	3UTR	MIRT548344	1	1
hsa-let-7c-5p	NM_001363818	MTX3	TGAGGTAGTAGGTTGTATGGTT#GGCTGGAGTGCAGTAGCGCAGTCTCGGCTCACTGCAACCTCTACCTCC#.(((((((.(((((((((((((#.))).)).))))))))))))))).	3500	3548	1.0	-24.5	1	0.00175282	0.412	0.0	0.0	-4.849714495602881	20	24	15	3UTR	MIRT682446	0	0
hsa-let-7c-5p	NM_001365953	KIF1B	TGAGGTAGTAGGTTGTATGGTT#GGCTGCAGTGCAGTGGCACAATCTCAGCTCACTGCAACCTCTGCCTCC#.(((((((.(((((((((((((#.))).)).))))))))))))))).	6481	6529	1.0	-24.6	1	0.0003159861	0.441	0.0	0.0	-4.849714495602881	20	24	15	3UTR	MIRT051831	0	0
hsa-let-7c-5p	NM_001366307	KPNA5	TGAGGTAGTAGGTTGTATGGTT#TCAGCAATCTACTGGCTG#..((.(((((((((((.(((..#)))))))))))))).)).	4894	4912	1.0	-17.7	0	0.0004013811	0.647	0.36720984545454544	1.0659999724999998	-9.076037894184761	16	18	14	3UTR	MIRT502100	1	0
hsa-let-7c-5p	NM_001368095	TGOLN2	TGAGGTAGTAGGTTGTATGGTT#GACCATGCTTCTTATATTATCTTC#.(((((((((((..((((((((#))))))))..)))))..)))))).	2757	2781	1.0	-18.7	1	0.1878282	0.618	0.0	0.0	-5.9392953675437665	19	24	8	3UTR	MIRT573822	0	0
hsa-let-7c-5p	NM_001368096	TGOLN2	TGAGGTAGTAGGTTGTATGGTT#GACCATGCTTCTTATATTATCTTC#.(((((((((((..((((((((#))))))))..)))))..)))))).	2716	2740	1.0	-18.7	1	0.1878282	0.618	0.0	0.0	-5.9392953675437665	19	24	8	3UTR	MIRT573822	0	0
hsa-let-7c-5p	XM_017020201	ACVR1B	TGAGGTAGTAGGTTGTATGGTT#GCCATATTACGACTTAGTGCCCTCT#.((((((.(((((((((((((.#))))...))))))))).)))).)).	1203	1228	1.0	-21.0	1	0.04822056	0.544	0.0	0.0	-6.106959766537749	19	25	9	3UTR	MIRT051801	1	0
hsa-let-7c-5p	XM_017024551	SOCS7	TGAGGTAGTAGGTTGTATGGTT#GATCTTTCCCTTCCCTGCTGCCTCG#.(((((((((((..........#.))))))))))).	6045	6070	1.0	-20.7	1	0.08510256	0.515	0.0	0.0	-6.907794008098015	11	13	11	3UTR	MIRT735635	0	1
hsa-let-7c-5p	XM_017027993	BCL2L1	TGAGGTAGTAGGTTGTATGGTT#TATGGCCTCAGCTGCCTCAC#(((((((((((((((((.....#))))))))..))))))))).	1691	1711	1.0	-21.0	1	0.00189519	0.456	0.0	0.0	-3.937574446201665	17	20	9	3UTR	MIRT004491	1	1
hsa-let-7c-5p	XM_024448983	NAP1L1	TGAGGTAGTAGGTTGTATGGTT#AATTGAACAGCCTATGTCCTCAG#(((((..(((((((((......#.)))))))))..))))).	11112	11135	1.0	-22.3	0	0.00131599	0.603	0.0	0.0	-7.382219742266031	14	18	9	3UTR	MIRT712371	1	1
hsa-let-7c-5p	XM_024448983	NAP1L1	TGAGGTAGTAGGTTGTATGGTT#ACTGTTTACCTAACTACCTCAT#(((((((((((((...(((((.#)))))..))))).)))))))).	2313	2335	1.0	-20.4	1	0.00421968	0.676	0.0	0.0	-5.762913004276319	18	22	8	3UTR	MIRT712371	1	1
hsa-let-7c-5p	XM_047420438	CPA4	TGAGGTAGTAGGTTGTATGGTT#GATCTTGGCTCACCACAACCTCTGCCTCC#.(((((((.(((((((..(((.#.))))))))))))))))).	2015	2044	1.0	-23.8	1	0.0491033	0.426	0.0	0.0	-4.849714495602881	17	19	17	3UTR	MIRT682608	1	1
hsa-let-7c-5p	XM_047420438	CPA4	TGAGGTAGTAGGTTGTATGGTT#GACCACAAGTTCCTAAGTAGAGCAAGAATTCATCAACCAGCTGCCTCT#.((((((((.(((((.((((..#.))))))))).)))))))).	2702	2750	1.0	-22.7	1	0.03763485	0.559	0.0	0.0	-5.2688803859889095	17	20	9	3UTR	MIRT682608	1	1
hsa-let-7c-5p	XM_047425088	POLL	TGAGGTAGTAGGTTGTATGGTT#CCAGACAGGAGCAGGCTGCCACCCCTTCTACCTCAC#((((((((.(((.....((((.#.))))..))).)))))))).	1886	1922	1.0	-18.9	1	0.5624019	0.426	0.0	0.0	-8.108433275188325	15	20	8	3UTR	MIRT735631	0	1
hsa-let-7c-5p	XM_047427391	RDX	TGAGGTAGTAGGTTGTATGGTT#AGCATATAAAAACATCAGTCCCGAGGAGGGGACAACAATACTACCTCAC#((((((((((.(((((......#.)))))..)))))))))).	2015	2064	1.0	-21.0	1	0.2286972	0.544	0.0	0.0	-6.7623489216120145	15	19	10	3UTR	MIRT521391	1	1
hsa-let-7c-5p	XM_047429469	STAT2	TGAGGTAGTAGGTTGTATGGTT#AGCTCACTGCAGCCTCAACCTCCTGGGTTCAAGCAATCCTCCTACCTCAG#((((((((.(((((((.(((..#.))).)))).))).)))))))).	2558	2608	1.0	-21.6	1	0.01148797	0.412	0.0	0.0	-4.993964104447428	18	23	8	3UTR	MIRT439141	0	0
hsa-let-7c-5p	XM_047432115	DYRK3	TGAGGTAGTAGGTTGTATGGTT#ATACTCCTACTACTTTG#.(((((((((((..((((....#)))).))))))))))).	7180	7197	1.0	-18.1	1	0.04643035	0.618	0.0	0.0	-5.9392953675437665	15	17	11	3UTR	MIRT735619	0	0
hsa-let-7c-5p	XM_047447472	CTPS1	TGAGGTAGTAGGTTGTATGGTT#GGCTGGAGTGCAGTGGCATGATCCCAGTTCACTGCAACCTCTGCCTTC#.(((((((.(((((((((((..#.))).))))))))))))))).	1609	1657	1.0	-21.9	1	0.0005037141	0.426	0.0	0.0	-4.849714495602881	18	21	15	3UTR	MIRT704419	1	0
hsa-let-7c-5p	XM_047449174	AK4	TGAGGTAGTAGGTTGTATGGTT#GATGATGAAATTTATTCCTGCTGCCTTAA#((((((((((((..(((.....#.))).)))))))))))).	2013	2042	1.0	-19.2	1	0.1383982	0.618	0.0	0.0	-6.083544976388314	15	18	12	3UTR	MIRT508934	0	0
hsa-let-7c-5p	NM_175736	FMNL3	TGAGGTAGTAGGTTGTATGGTT#AGCGCTACAGCCTGCTCTCTTCT#.((((.(((((((((((..(((#)))..)))))))))))..)))).	9620	9643	1.0	-22.0	0	0.0009714009	0.397	0.0	0.0	-5.694283598550164	18	23	11	3UTR	MIRT449955	0	0
hsa-let-7c-5p	NM_175852	TXLNA	TGAGGTAGTAGGTTGTATGGTT#AGCCAGGCACCTGCTCCTCT#.((((.((((((.(((.(((((#))))).))))))))))))).	4658	4678	1.0	-23.6	0	0.0005708911	0.338	0.0	0.0	-6.983414211216407	18	20	13	3UTR	MIRT068152	1	1
hsa-let-7c-5p	NM_177560	CSNK2A1	TGAGGTAGTAGGTTGTATGGTT#TTACTGGGCATAACTTACTGCTTTT#.(((((((((((((((......#.))))))))))))))).	2071	2096	1.0	-17.5	1	0.04331743	0.691	0.6908949133333333	0.6233995637499998	-3.793324837357118	15	17	15	3UTR	MIRT051854	1	0
hsa-let-7c-5p	NM_177966	PDE12	TGAGGTAGTAGGTTGTATGGTT#GCCATCACGGCTTACTGCAACCTCC#.((((((((((((((((((((.#))))).))))))))))...))))).	6658	6683	1.0	-23.5	1	0.001173057	0.397	0.0	0.0	-3.793324837357118	20	25	10	3UTR	MIRT120919	1	1
hsa-let-7c-5p	NM_178819	GPAT4	TGAGGTAGTAGGTTGTATGGTT#AATCTCAGCTCCACTGCAACCTCTACCTCC#.(((((((.(((((((((((..#.))).))))))))))))))).	5197	5227	1.0	-26.2	1	0.02850893	0.456	0.0	0.0	-4.849714495602881	18	21	15	3UTR	MIRT735623	1	1
hsa-let-7c-5p	NM_182757	RNF144B	TGAGGTAGTAGGTTGTATGGTT#ACACGTAGCCCACTGCCTCAT#(((((((((.(((((.......#.))))).))))))))).	3242	3263	1.0	-20.0	1	0.000987527	0.632	0.0	0.0	-5.413129994833456	14	17	9	3UTR	MIRT469104	0	0
hsa-let-7c-5p	NM_183228	IKZF3	TGAGGTAGTAGGTTGTATGGTT#GGCTCAAGCAATCTGCCCACCTCAG#((((((.(((((((((.(((((#))).)).)))))))))..)))))).	6398	6423	1.0	-21.5	0	0.05188554	0.456	0.0	0.0	-5.4812609810729835	20	25	9	3UTR	MIRT511388	0	1
hsa-let-7c-5p	NM_183229	IKZF3	TGAGGTAGTAGGTTGTATGGTT#GGCTCAAGCAATCTGCCCACCTCAG#((((((.(((((((((.(((((#))).)).)))))))))..)))))).	6449	6474	1.0	-21.5	0	0.05188554	0.456	0.0	0.0	-5.4812609810729835	20	25	9	3UTR	MIRT511388	0	1
hsa-let-7c-5p	NM_183230	IKZF3	TGAGGTAGTAGGTTGTATGGTT#GGCTCAAGCAATCTGCCCACCTCAG#((((((.(((((((((.(((((#))).)).)))))))))..)))))).	6449	6474	1.0	-21.5	0	0.05188554	0.456	-0.011131222222222237	0.10476290000000002	-5.4812609810729835	20	25	9	3UTR	MIRT511388	0	1
hsa-let-7c-5p	NM_183416	KIF1B	TGAGGTAGTAGGTTGTATGGTT#GGCTGCAGTGCAGTGGCACAATCTCAGCTCACTGCAACCTCTGCCTCC#.(((((((.(((((((((((((#.))).)).))))))))))))))).	6556	6604	1.0	-24.6	1	0.0003159861	0.441	0.0	0.0	-4.849714495602881	20	24	15	3UTR	MIRT051831	0	0
hsa-let-7c-5p	NM_198332	STAT2	TGAGGTAGTAGGTTGTATGGTT#AGCTCACTGCAGCCTCAACCTCCTGGGTTCAAGCAATCCTCCTACCTCAG#((((((((.(((((((.(((..#.))).)))).))).)))))))).	3451	3501	1.0	-21.6	1	0.01148797	0.412	0.03882672500000001	0.0043049937500000066	-4.993964104447428	18	23	8	3UTR	MIRT439141	0	0
hsa-let-7c-5p	NM_198401	ANKRD46	TGAGGTAGTAGGTTGTATGGTT#GATCAAGTATATTGCATCCTAACGCTACCTCT#.(((((((((((.((((.....#.)))).)))...)))))))).	1151	1183	1.0	-19.3	1	0.09226744	0.603	0.6516169714285714	1.322560965	-5.08245545002336	15	21	8	3UTR	MIRT449007	1	1
hsa-let-7c-5p	NM_198514	NHLRC2	TGAGGTAGTAGGTTGTATGGTT#GGCTCACTGCAACCTCTACCTCC#.(((((((.(((((((((((((#))).)).))))))))))))))).	4126	4149	1.0	-24.2	1	0.03490242	0.426	0.0	0.0	-4.849714495602881	20	23	15	3UTR	MIRT701429	1	0
hsa-let-7c-5p	NM_198514	NHLRC2	TGAGGTAGTAGGTTGTATGGTT#GCCCAACAACCTGCACCA#...(((.(((((((((..(((.#)))..)))))))))))).	6433	6451	1.0	-20.8	0	0.1252688	0.618	0.0	0.0	-8.058226728550057	15	18	12	3UTR	MIRT701429	1	0
hsa-let-7c-5p	NM_198900	FMNL3	TGAGGTAGTAGGTTGTATGGTT#AGCGCTACAGCCTGCTCTCTTCT#.((((.(((((((((((..(((#)))..)))))))))))..)))).	9467	9490	1.0	-22.0	0	0.0009714009	0.397	0.0	0.0	-5.694283598550164	18	23	11	3UTR	MIRT449955	0	0
hsa-let-7c-5p	NM_201269	ZNF644	TGAGGTAGTAGGTTGTATGGTT#ACTCCAGTTGCATTTCTCAGACAATAAAGTGGTGCATCCATGCTACCTCC#.(((((((((((.(((((.(..#.).))))).)).))))))))).	4721	4771	1.0	-22.2	1	0.01579386	0.603	0.9060387499999999	0.89296499125	-5.08245545002336	17	22	9	3UTR	MIRT505018	1	1
hsa-let-7c-5p	NM_001369846	ZBTB37	TGAGGTAGTAGGTTGTATGGTT#GACTCAAGCAATCCTCCTACCTCAT#((((((((.(((((((.(((((#))).)).)))).))).)))))))).	10884	10909	1.0	-22.3	1	0.4417101	0.426	0.0	0.0	-4.993964104447428	20	25	8	3UTR	MIRT574365	1	0
hsa-let-7c-5p	NM_001369846	ZBTB37	TGAGGTAGTAGGTTGTATGGTT#TCATATGGCCTACACCA#...(((.(((((((((((((..#)))))))))))))))).	8918	8935	1.0	-20.3	0	0.001561706	0.676	0.0	0.0	-8.058226728550057	16	17	16	3UTR	MIRT574365	1	0
hsa-let-7c-5p	NM_001370208	FBXL20	TGAGGTAGTAGGTTGTATGGTT#GCCATGGCACAATCTCAGTTCACTGCAACCTCTGCCTCC#.(((((((.(((((((((((..#.))).))))))))))))))).	6827	6866	1.0	-23.8	1	0.0003000648	0.485	0.0	0.0	-4.849714495602881	18	21	15	3UTR	MIRT548267	0	0
hsa-let-7c-5p	NM_001370208	FBXL20	TGAGGTAGTAGGTTGTATGGTT#AGGCATGCACCACTACTGCCTGGC#(.((((((((((.((((((.((#)).)))))).).))))))))).).	3252	3276	1.0	-21.8	1	0.0001194388	0.559	0.0	0.0	-6.3903809408830785	19	24	9	3UTR	MIRT548267	0	0
hsa-let-7c-5p	NM_001370535	RFWD3	TGAGGTAGTAGGTTGTATGGTT#ACCATATTCCTTTGTCACTACCTCT#.(((((((((((..(((((((.#))))))).))).....)))))))).	4870	4895	1.0	-21.9	1	0.1883736	0.544	0.0	0.0	-5.9392953675437665	18	25	8	3UTR	MIRT051730	0	0
hsa-let-7c-5p	NM_001376857	TXLNA	TGAGGTAGTAGGTTGTATGGTT#AGCCAGGCACCTGCTCCTCT#.((((.((((((.(((.(((((#))))).))))))))))))).	4805	4825	1.0	-23.6	0	0.0005708911	0.338	0.0	0.0	-6.983414211216407	18	20	13	3UTR	MIRT068152	1	1
hsa-let-7c-5p	NM_001377960	RBM12B	TGAGGTAGTAGGTTGTATGGTT#GACCACTGACTCCAGTTCATGCTTTTGCTGCCTCAC#((((((((((((..((((((..#.)))))).)))))))))))).	4593	4629	1.0	-22.1	1	0.01469671	0.618	0.0	0.0	-6.083544976388314	18	21	12	3UTR	MIRT543787	0	0
hsa-let-7c-5p	NM_001377963	RBM12B	TGAGGTAGTAGGTTGTATGGTT#GACCACTGACTCCAGTTCATGCTTTTGCTGCCTCAC#((((((((((((..((((((..#.)))))).)))))))))))).	4538	4574	1.0	-22.1	1	0.01469671	0.618	0.0	0.0	-6.083544976388314	18	21	12	3UTR	MIRT543787	0	0
hsa-let-7c-5p	NM_001379446	SLC11A2	TGAGGTAGTAGGTTGTATGGTT#TATATGACCTCTCTGCCTTAT#((((((((.((((((((((...#))))))))))..)))))))).	3689	3710	1.0	-20.8	1	0.1394302	0.691	0.0	0.0	-4.993964104447428	18	21	10	3UTR	MIRT461170	0	0
hsa-let-7c-5p	NM_001385111	STAT2	TGAGGTAGTAGGTTGTATGGTT#AGCTCACTGCAGCCTCAACCTCCTGGGTTCAAGCAATCCTCCTACCTCAG#((((((((.(((((((.(((..#.))).)))).))).)))))))).	3364	3414	1.0	-21.6	1	0.01148797	0.412	0.0	0.0	-4.993964104447428	18	23	8	3UTR	MIRT439141	0	0
hsa-let-7c-5p	NM_001395199	ZBTB37	TGAGGTAGTAGGTTGTATGGTT#GACTCAAGCAATCCTCCTACCTCAT#((((((((.(((((((.(((((#))).)).)))).))).)))))))).	10836	10861	1.0	-22.3	1	0.4417101	0.426	0.0	0.0	-4.993964104447428	20	25	8	3UTR	MIRT574365	1	0
hsa-let-7c-5p	NM_001395199	ZBTB37	TGAGGTAGTAGGTTGTATGGTT#TCATATGGCCTACACCA#...(((.(((((((((((((..#)))))))))))))))).	8870	8887	1.0	-20.3	0	0.001561706	0.676	0.0	0.0	-8.058226728550057	16	17	16	3UTR	MIRT574365	1	0
hsa-let-7c-5p	NM_014598	SOCS7	TGAGGTAGTAGGTTGTATGGTT#GATCTTTCCCTTCCCTGCTGCCTCG#.(((((((((((..........#.))))))))))).	6147	6172	1.0	-20.7	1	0.08510256	0.515	0.014374545454545447	-0.004086582499999936	-6.907794008098015	11	13	11	3UTR	MIRT735635	0	1
hsa-let-7c-5p	NM_014672	PRORP	TGAGGTAGTAGGTTGTATGGTT#GGCTGGAGTGCAATGGTTTGATCTCAGTTCACTGCAACCTCTGCCTCC#.(((((((.(((((((((((..#.))).))))))))))))))).	5633	5681	1.0	-23.8	1	0.00142087	0.485	-0.19165994166666667	-0.2666350325	-4.849714495602881	18	21	15	3UTR	MIRT549801	1	0
hsa-let-7c-5p	NM_014923	FNDC3A	TGAGGTAGTAGGTTGTATGGTT#CCATAAGTTTCTGCTGCTTCT#.(((((((((((...(((((..#)))))....))))))))))).	4457	4478	1.0	-20.6	1	0.007471091	0.559	1.720968181818182	1.0489709275	-6.674744927794402	16	21	11	3UTR	MIRT068787	1	1
hsa-let-7c-5p	NM_014923	FNDC3A	TGAGGTAGTAGGTTGTATGGTT#GCTATATTTCTACCTCCTCAT#(((((..(((((..(((((((.#))))))).)))))..))))).	3967	3988	1.0	-19.2	0	0.2253434	0.662	3.5102517142857144	3.417739101250001	-9.528190272452681	17	21	7	3UTR	MIRT068787	1	1
hsa-let-7c-5p	NM_015328	AHCYL2	TGAGGTAGTAGGTTGTATGGTT#GACCAAAAATCATAACCTGCTGTTTCTCAG#((((((((((((((((.(((((#)))))......)))))))))))..))))).	3882	3912	1.0	-19.9	1	0.001534601	0.588	0.8035122611111113	0.3427589762500001	-3.937574446201665	21	30	11	3UTR	MIRT482222	0	0
hsa-let-7c-5p	NM_015885	PCF11	TGAGGTAGTAGGTTGTATGGTT#TGCATTTCCTACTGCCTGCAG#((((((((((((.((((.....#))))...)))))))))).)).	5135	5156	1.0	-19.5	1	0.001647603	0.632	4.346721538461539	4.1942743999999985	-5.226705058867908	16	21	10	3UTR	MIRT051836	0	0
hsa-let-7c-5p	NM_016124	RHD	TGAGGTAGTAGGTTGTATGGTT#ACCATCTTGGCTCACTGCAACCTCTACCTCC#.(((((((.(((((((((((((#.))).)).))))))))))))))).	1674	1705	1.0	-24.4	1	0.02089599	0.441	0.1323924	-0.039763404999999946	-4.849714495602881	20	24	15	3UTR	MIRT453403	0	0
hsa-let-7c-5p	NM_016352	CPA4	TGAGGTAGTAGGTTGTATGGTT#GATCTTGGCTCACCACAACCTCTGCCTCC#.(((((((.(((((((..(((.#.))))))))))))))))).	1892	1921	1.0	-23.8	1	0.0491033	0.426	-0.212389	-0.138261575	-4.849714495602881	17	19	17	3UTR	MIRT682608	1	1
hsa-let-7c-5p	NM_016352	CPA4	TGAGGTAGTAGGTTGTATGGTT#GACCACAAGTTCCTAAGTAGAGCAAGAATTCATCAACCAGCTGCCTCT#.((((((((.(((((.((((..#.))))))))).)))))))).	2579	2627	1.0	-22.7	1	0.03763485	0.559	0.07412550000000001	0.0769441315	-5.2688803859889095	17	20	9	3UTR	MIRT682608	1	1
hsa-let-7c-5p	NM_016620	ZNF644	TGAGGTAGTAGGTTGTATGGTT#ACTCCAGTTGCATTTCTCAGACAATAAAGTGGTGCATCCATGCTACCTCC#.(((((((((((.(((((.(..#.).))))).)).))))))))).	1242	1292	1.0	-22.2	1	0.01579386	0.603	1.2837079999999996	2.3789366862499994	-5.08245545002336	17	22	9	3UTR	MIRT505018	1	1
hsa-let-7c-5p	NM_017774	CDKAL1	TGAGGTAGTAGGTTGTATGGTT#GGCTGGAGTGGTGCAGTGGCACGATCTCAGGTCACTGCAACCTCTGCCTCC#.(((((((.(((((((((((..#.))).))))))))))))))).	2335	2386	1.0	-23.8	1	0.001071558	0.412	-0.013933833333333335	0.04005513625000002	-4.849714495602881	18	21	15	3UTR	MIRT681762	0	1
hsa-let-7c-5p	NM_018085	IPO9	TGAGGTAGTAGGTTGTATGGTT#GACAGAGCGACACTCTGCCTCAA#((((((((.(((((((...(((#)))...))))).)))))))))).	9535	9558	1.0	-20.4	1	0.01658696	0.603	-0.3546841249999999	0.08055765124999999	-4.993964104447428	18	23	10	3UTR	MIRT702713	1	0
hsa-let-7c-5p	NM_018124	RFWD3	TGAGGTAGTAGGTTGTATGGTT#ACCATATTCCTTTGTCACTACCTCT#.(((((((((((..(((((((.#))))))).))).....)))))))).	4748	4773	1.0	-21.9	1	0.1883736	0.544	0.29724167500000004	0.15863771124999995	-5.9392953675437665	18	25	8	3UTR	MIRT051730	0	0
hsa-let-7c-5p	NM_001191	BCL2L1	TGAGGTAGTAGGTTGTATGGTT#TATGGCCTCAGCTGCCTCAC#(((((((((((((((((.....#))))))))..))))))))).	1696	1716	1.0	-21.0	1	0.00189519	0.456	0.0	0.0	-3.937574446201665	17	20	9	3UTR	MIRT004491	1	1
hsa-let-7c-5p	NM_001199743	DCTN5	TGAGGTAGTAGGTTGTATGGTT#GGCCATACTGACCTGTGCCA#...((((.((((((((((((((#)))))))).)))))))))).	5514	5534	1.0	-21.8	0	0.01506617	0.529	-0.06474959333333334	-0.09193830875000002	-8.82817512285937	18	20	10	3UTR	MIRT051842	0	0
hsa-let-7c-5p	NM_001204817	ZNF587	TGAGGTAGTAGGTTGTATGGTT#GGCTCACTGCAACCTCTGCCTCC#.(((((((.(((((((((((((#))).)).))))))))))))))).	2691	2714	1.0	-24.2	1	0.01256908	0.471	0.19126935999999997	0.007911104625000012	-4.849714495602881	20	23	15	3UTR	MIRT457679	0	1
hsa-let-7c-5p	NM_001204817	ZNF587	TGAGGTAGTAGGTTGTATGGTT#AGCTCATTGCAACCTCTGCTTCC#.(((((((.(((((((((((((#))).))).)))))))))))))).	3164	3187	1.0	-21.6	1	0.01705784	0.412	0.1407514666666666	0.0015119499999999356	-4.849714495602881	20	23	14	3UTR	MIRT457679	0	1
hsa-let-7c-5p	NM_001207067	BZW1	TGAGGTAGTAGGTTGTATGGTT#GCCAGTGCCAGCCTATGGCCTCAA#((((((.((((((((..((((.#))))....)))))))).)))))).	3470	3494	1.0	-24.6	0	0.000104746	0.647	0.329095025	0.7697874899999999	-5.7143100613765965	18	24	8	3UTR	MIRT300035	1	1
hsa-let-7c-5p	NM_001207068	BZW1	TGAGGTAGTAGGTTGTATGGTT#GCCAGTGCCAGCCTATGGCCTCAA#((((((.((((((((..((((.#))))....)))))))).)))))).	3497	3521	1.0	-24.6	0	0.000104746	0.647	0.329095025	0.7697874899999999	-5.7143100613765965	18	24	8	3UTR	MIRT300035	1	1
hsa-let-7c-5p	NM_001207069	BZW1	TGAGGTAGTAGGTTGTATGGTT#AGCTCACTGCAATCTCTGCCTCC#.(((((((.(((((((((((((#))).)).))))))))))))))).	4350	4373	1.0	-21.7	1	0.02175361	0.471	0.0	0.0	-4.849714495602881	20	23	15	3UTR	MIRT300035	1	1
hsa-let-7c-5p	NM_001243349	SH3D19	TGAGGTAGTAGGTTGTATGGTT#GAGCATATCAGCCTTATTACCA#...((((((((((((((((.((#)).)))).)))))).)))))).	3652	3674	1.0	-19.4	0	0.03672448	0.618	1.0550000000000004	2.1920375	-6.514540193678739	18	22	6	3UTR	MIRT051806	0	0
hsa-let-7c-5p	NM_001256678	PRORP	TGAGGTAGTAGGTTGTATGGTT#GGCTGGAGTGCAATGGTTTGATCTCAGTTCACTGCAACCTCTGCCTCC#.(((((((.(((((((((((..#.))).))))))))))))))).	5585	5633	1.0	-23.8	1	0.00142087	0.485	-0.19165994166666667	-0.2666350325	-4.849714495602881	18	21	15	3UTR	MIRT549801	1	0
hsa-let-7c-5p	NM_001256679	PRORP	TGAGGTAGTAGGTTGTATGGTT#GGCTGGAGTGCAATGGTTTGATCTCAGTTCACTGCAACCTCTGCCTCC#.(((((((.(((((((((((..#.))).))))))))))))))).	5080	5128	1.0	-23.8	1	0.00142087	0.485	-0.19165994166666667	-0.2666350325	-4.849714495602881	18	21	15	3UTR	MIRT549801	1	0
hsa-let-7c-5p	NM_001256680	PRORP	TGAGGTAGTAGGTTGTATGGTT#GGCTGGAGTGCAATGGTTTGATCTCAGTTCACTGCAACCTCTGCCTCC#.(((((((.(((((((((((..#.))).))))))))))))))).	4628	4676	1.0	-23.8	1	0.00142087	0.485	-0.19165994166666667	-0.2666350325	-4.849714495602881	18	21	15	3UTR	MIRT549801	1	0
hsa-let-7c-5p	NM_001256681	PRORP	TGAGGTAGTAGGTTGTATGGTT#GGCTGGAGTGCAATGGTTTGATCTCAGTTCACTGCAACCTCTGCCTCC#.(((((((.(((((((((((..#.))).))))))))))))))).	4580	4628	1.0	-23.8	1	0.00142087	0.485	0.0	0.0	-4.849714495602881	18	21	15	3UTR	MIRT549801	1	0
hsa-let-7c-5p	NM_001257412	IKZF3	TGAGGTAGTAGGTTGTATGGTT#GGCTCAAACAATCCTCCTACCTCAG#((((((((.(((((((.(((((#))).)).)))).))).)))))))).	5883	5908	1.0	-21.7	1	0.02771617	0.515	1.124335375	1.0053975450000001	-4.993964104447428	20	25	8	3UTR	MIRT511388	0	1
hsa-let-7c-5p	NM_001257413	IKZF3	TGAGGTAGTAGGTTGTATGGTT#GGCTCAAGCAATCTGCCCACCTCAG#((((((.(((((((((.(((((#))).)).)))))))))..)))))).	5903	5928	1.0	-21.5	0	0.05188554	0.456	2.729290777777778	0.8168198150000001	-5.4812609810729835	20	25	9	3UTR	MIRT511388	0	1
hsa-let-7c-5p	NM_001259	CDK6	TGAGGTAGTAGGTTGTATGGTT#TCATACCATCTCTGCCTTAT#((((((((.((((.((((((..#)))))).)))))))))))).	3070	3090	1.0	-20.0	1	0.1103712	0.603	0.3931445	0.64748405	-5.850804021967834	18	20	12	3UTR	MIRT000407	1	0
hsa-let-7c-5p	NM_001270709	NRM	TGAGGTAGTAGGTTGTATGGTT#GGCCCCAACCTTGCCTCAC#(((((((..((((((...((((#)))).))))))))))))).	1054	1073	1.0	-19.6	1	0.008949999	0.353	2.0676797714285717	1.19483018	-7.540648113931671	17	19	13	3UTR	MIRT439154	0	0
hsa-let-7c-5p	NM_001271629	MEF2D	TGAGGTAGTAGGTTGTATGGTT#CCCTGCAGCCCTACCTCT#.(((((((..(((((((.((..#)).)))))))))))))).	4109	4127	1.0	-22.4	1	0.02550181	0.382	3.0737979442857144	3.128337957625	-6.09222096393106	16	18	14	3UTR	MIRT735627	1	0
hsa-let-7c-5p	NM_001277783	ATG12	TGAGGTAGTAGGTTGTATGGTT#GACTGTAATGGCACAATCTTGGCTCATTGCAACCTCTACCTCC#.(((((((.(((((((((((((#.))).))).)))))))))))))).	2017	2060	1.0	-24.4	1	0.001828149	0.471	0.19833104000000004	0.2798404082499999	-4.849714495602881	20	24	14	3UTR	MIRT481390	0	0
hsa-let-7c-5p	NM_001278277	E2F6	TGAGGTAGTAGGTTGTATGGTT#CATACCTAGCTGTTTCTACCTCAT#((((((((..(((((((((...#)))))..))))....)))))))).	2333	2357	1.0	-19.1	1	0.04248407	0.544	4.1919498181818176	2.863480996249999	-6.236470572775607	17	24	8	3UTR	MIRT567719	1	1
hsa-let-7c-5p	NM_001278312	NUP155	TGAGGTAGTAGGTTGTATGGTT#AGCCTGGAGTGCAGTGGTGCGATCCCGGCTCACTGCAACCTCTGCCTCAC#((((((((.(((((((((((((#.))).)).)))))))))))))))).	5560	5610	1.0	-25.8	1	0.0006476285	0.412	0.0	0.0	-4.993964104447428	21	25	16	3UTR	MIRT506361	1	0
hsa-let-7c-5p	NM_001278438	FNDC3A	TGAGGTAGTAGGTTGTATGGTT#CCATAAGTTTCTGCTGCTTCT#.(((((((((((...(((((..#)))))....))))))))))).	4837	4858	1.0	-20.6	1	0.007471091	0.559	-0.42880487272727275	0.42694802500000006	-6.674744927794402	16	21	11	3UTR	MIRT068787	1	1
hsa-let-7c-5p	NM_001278518	MDM4	TGAGGTAGTAGGTTGTATGGTT#GGCTCACTGCAACCTCTGCCTCC#.(((((((.(((((((((((((#))).)).))))))))))))))).	4395	4418	1.0	-24.2	1	0.002907259	0.412	0.0	0.0	-4.849714495602881	20	23	15	3UTR	MIRT112240	1	1
hsa-let-7c-5p	NM_001278518	MDM4	TGAGGTAGTAGGTTGTATGGTT#ACCGCAACCTCTGCCTCC#.(((((((.(((((((..(((.#))))))))))))))))).	3847	3865	1.0	-23.6	1	0.002025972	0.397	0.0	0.0	-4.849714495602881	17	18	17	3UTR	MIRT112240	1	1
hsa-let-7c-5p	NM_001278518	MDM4	TGAGGTAGTAGGTTGTATGGTT#AGCCATGCCAGCCTCCACACTGCCA#...(((((((((((((((((((#)))))))).)))))....)))))).	5368	5393	1.0	-23.3	0	0.009191007	0.529	0.0	0.0	-6.514540193678739	19	25	8	3UTR	MIRT112240	1	1
hsa-let-7c-5p	NM_001282868	RHD	TGAGGTAGTAGGTTGTATGGTT#ACCATCTTGGCTCACTGCAACCTCTACCTCC#.(((((((.(((((((((((((#.))).)).))))))))))))))).	1489	1520	1.0	-24.4	1	0.02089599	0.441	0.023477533333333345	-0.0008965125000000088	-4.849714495602881	20	24	15	3UTR	MIRT453403	0	0
hsa-let-7c-5p	NM_001282869	RHD	TGAGGTAGTAGGTTGTATGGTT#ACCATCTTGGCTCACTGCAACCTCTACCTCC#.(((((((.(((((((((((((#.))).)).))))))))))))))).	1520	1551	1.0	-24.4	1	0.02089599	0.441	0.0	0.0	-4.849714495602881	20	24	15	3UTR	MIRT453403	0	0
hsa-let-7c-5p	NM_001282870	RHD	TGAGGTAGTAGGTTGTATGGTT#ACCATCTTGGCTCACTGCAACCTCTACCTCC#.(((((((.(((((((((((((#.))).)).))))))))))))))).	1623	1654	1.0	-24.4	1	0.02089599	0.441	0.023477533333333345	-0.0008965125000000088	-4.849714495602881	20	24	15	3UTR	MIRT453403	0	0
hsa-let-7c-5p	NM_001282871	RHD	TGAGGTAGTAGGTTGTATGGTT#ACCATCTTGGCTCACTGCAACCTCTACCTCC#.(((((((.(((((((((((((#.))).)).))))))))))))))).	1690	1721	1.0	-24.4	1	0.02089599	0.441	0.023477533333333345	-0.0008965125000000088	-4.849714495602881	20	24	15	3UTR	MIRT453403	0	0
hsa-let-7c-5p	NM_001282872	RHD	TGAGGTAGTAGGTTGTATGGTT#ACCATCTTGGCTCACTGCAACCTCTACCTCC#.(((((((.(((((((((((((#.))).)).))))))))))))))).	1793	1824	1.0	-24.4	1	0.02089599	0.441	0.023477533333333345	-0.0008965125000000088	-4.849714495602881	20	24	15	3UTR	MIRT453403	0	0
hsa-let-7c-5p	NM_001284335	EIF3J	TGAGGTAGTAGGTTGTATGGTT#ACCAGCACCATTCAGTAATACAGCCTTAACCATACCTCCTTGAACTACTTCAT#((((((((((((..((((((((#.))))))))..)))...))))))))).	996	1049	1.0	-24.8	1	0.05672301	0.618	2.7008954933333333	2.2017546150000005	-6.083544976388314	20	27	9	3UTR	MIRT032188	0	0
hsa-let-7c-5p	NM_001284336	EIF3J	TGAGGTAGTAGGTTGTATGGTT#ACCAGCACCATTCAGTAATACAGCCTTAACCATACCTCCTTGAACTACTTCAT#((((((((((((..((((((((#.))))))))..)))...))))))))).	1011	1064	1.0	-24.8	1	0.05672301	0.618	2.7008954933333333	2.2017546150000005	-6.083544976388314	20	27	9	3UTR	MIRT032188	0	0
hsa-let-7c-5p	NM_001284514	IKZF3	TGAGGTAGTAGGTTGTATGGTT#GGCTCAAGCAATCTGCCCACCTCAG#((((((.(((((((((.(((((#))).)).)))))))))..)))))).	6692	6717	1.0	-21.5	0	0.05188554	0.456	-0.07077777777777779	0.12121712499999994	-5.4812609810729835	20	25	9	3UTR	MIRT511388	0	1
hsa-let-7c-5p	NM_001284516	IKZF3	TGAGGTAGTAGGTTGTATGGTT#GGCTCAAACAATCCTCCTACCTCAG#((((((((.(((((((.(((((#))).)).)))).))).)))))))).	5875	5900	1.0	-21.7	1	0.02771617	0.515	0.8348170500000001	1.2471843175	-4.993964104447428	20	25	8	3UTR	MIRT511388	0	1
hsa-let-7c-5p	NM_001286433	NME4	TGAGGTAGTAGGTTGTATGGTT#AGGACCAACTACCTCC#.((((((((.((((.(......#).)))).)))))))).	521	537	1.0	-18.8	1	0.004179161	0.412	0.19727121249999996	-0.022547439999999995	-5.771280865935932	13	16	8	3UTR	MIRT051761	1	1
hsa-let-7c-5p	NM_001286435	NME4	TGAGGTAGTAGGTTGTATGGTT#AGGACCAACTACCTCC#.((((((((.((((.(......#).)))).)))))))).	733	749	1.0	-18.8	1	0.004179161	0.412	0.0	0.0	-5.771280865935932	13	16	8	3UTR	MIRT051761	1	1
hsa-let-7c-5p	NM_001286436	NME4	TGAGGTAGTAGGTTGTATGGTT#CCATCCCCCACGCAGGACCAACTACCTCC#.((((((((.((((((.(((..#.))).)))..))).)))))))).	846	875	1.0	-21.9	1	0.004179161	0.412	0.0577043375	-0.05743916500000001	-5.035831305685297	17	23	8	3UTR	MIRT051761	1	1
hsa-let-7c-5p	NM_001286439	NME4	TGAGGTAGTAGGTTGTATGGTT#AGGACCAACTACCTCC#.((((((((.((((.(......#).)))).)))))))).	810	826	1.0	-18.8	1	0.004179161	0.412	0.19727121249999996	-0.022547439999999995	-5.771280865935932	13	16	8	3UTR	MIRT051761	1	1
hsa-let-7c-5p	NM_001286440	NME4	TGAGGTAGTAGGTTGTATGGTT#AGGACCAACTACCTCC#.((((((((.((((.(......#).)))).)))))))).	946	962	1.0	-18.8	1	0.004179161	0.412	0.0	0.0	-5.771280865935932	13	16	8	3UTR	MIRT051761	1	1
hsa-let-7c-5p	NM_001286478	EIF3C	TGAGGTAGTAGGTTGTATGGTT#GGCCATCCAACCTTGAAGTCCTAAACCACACCTCAG#((((((.((((((((.((((((#)))))).))))))..............)))))))).	2868	2904	1.0	-20.9	0	0.09415701	0.544	3.569994036363637	3.2148791200000004	-5.7143100613765965	20	36	8	3UTR	MIRT051775	0	0
hsa-let-7c-5p	NM_001289410	FAM104A	TGAGGTAGTAGGTTGTATGGTT#AATTAACTGCCATACTACCTCT#.((((((((((((.((......#.)).))).))))))))).	1026	1048	1.0	-19.7	1	0.007343894	0.647	3.561530769230769	2.96138951	-4.650164754877524	14	18	9	3UTR	MIRT574789	1	1
hsa-let-7c-5p	NM_001289412	FAM104A	TGAGGTAGTAGGTTGTATGGTT#ACAGCCTGCTAACCTA#..((((((((((((((......#))))))))))).))).	1950	1966	1.0	-20.2	1	0.001357397	0.485	0.0	0.0	-4.95700071937229	14	16	11	3UTR	MIRT574789	1	1
hsa-let-7c-5p	NM_001289412	FAM104A	TGAGGTAGTAGGTTGTATGGTT#AATTAACTGCCATACTACCTCT#.((((((((((((.((......#.)).))).))))))))).	958	980	1.0	-19.7	1	0.007343894	0.647	0.0	0.0	-4.650164754877524	14	18	9	3UTR	MIRT574789	1	1
hsa-let-7c-5p	NM_018373	SYNJ2BP	TGAGGTAGTAGGTTGTATGGTT#TCAAGCGATTCTCCTGCCTCAG#((((((((.(((((((.(((..#))).))))).)).)))))))).	6073	6095	1.0	-18.7	1	0.01390017	0.412	0.977604625	0.8650985325	-4.993964104447428	18	22	8	3UTR	MIRT466726	1	0
hsa-let-7c-5p	NM_018566	YOD1	TGAGGTAGTAGGTTGTATGGTT#AATGAGGGTTGAAGCCTACTACCTCAC#((((((((((((((........#.)))))))))))))).	1235	1262	1.0	-24.0	1	0.01581462	0.529	0.647601757142857	0.25977203	-4.906073086755913	14	16	14	3UTR	MIRT510516	1	1
hsa-let-7c-5p	NM_018662	DISC1	TGAGGTAGTAGGTTGTATGGTT#GGCCCCGCAATCTCGGCTCACTGCAACCTCTACCTCC#.(((((((.(((((((((((((#.))).)).))))))))))))))).	5858	5895	1.0	-24.5	1	0.001094966	0.412	-0.4790060466666667	-0.15684404937500002	-4.849714495602881	20	24	15	3UTR	MIRT452945	0	0
hsa-let-7c-5p	NM_019008	MIEF1	TGAGGTAGTAGGTTGTATGGTT#GCCTCACAGGGTTCCTGCTGCCTGGT#(.((((((((((((((..(((.#)))..))))....)))))))))).).	1956	1982	1.0	-21.6	1	0.0001197483	0.441	0.5908833888888888	2.17779739475	-5.101250328216836	18	26	10	3UTR	MIRT473241	1	1
hsa-let-7c-5p	NM_019018	OTULINL	TGAGGTAGTAGGTTGTATGGTT#GGCTGCAGTGCAGTGGCACAATCTCGGCTCACTGCAACCTCTACCTCC#.(((((((.(((((((((((((#.))).)).))))))))))))))).	3826	3874	1.0	-24.5	1	0.01923112	0.412	0.07429950000000002	-0.11062902650000003	-4.849714495602881	20	24	15	3UTR	MIRT460502	0	0
hsa-let-7c-5p	NM_020232	PSMG2	TGAGGTAGTAGGTTGTATGGTT#ACCTTATACCCAAAACACTTACTACCA#...(((((((((.(((.(((..#.)))..)))))))))))).	878	905	1.0	-17.9	0	0.1783561	0.706	-0.21588771111111113	1.0522912075	-7.803670806344982	15	19	12	3UTR	MIRT051798	0	0
hsa-let-7c-5p	NM_020351	COL8A1	TGAGGTAGTAGGTTGTATGGTT#TGCAACCTCTACCTCC#.(((((((.((((((((.....#))))))))))))))).	3646	3662	1.0	-22.9	1	0.003749856	0.485	0.15699778749999999	0.09028867124999995	-4.849714495602881	15	16	15	3UTR	MIRT461366	0	0
hsa-let-7c-5p	NM_020749	MTUS1	TGAGGTAGTAGGTTGTATGGTT#GCAAACCTTCTACCTCC#.(((((((.(((((((......#)))).))).))))))).	2618	2635	1.0	-18.4	1	0.302939	0.544	2.8272671125000004	2.1971262410000003	-4.849714495602881	14	17	7	3UTR	MIRT472736	1	1
hsa-let-7c-5p	NM_020749	MTUS1	TGAGGTAGTAGGTTGTATGGTT#CCAAAACTTATTACCTCC#.(((((((((((((...(((..#))).))))))))))))).	3014	3032	1.0	-19.4	1	0.1149331	0.603	3.1714786153846153	2.6540745875000002	-4.761823477911366	16	18	13	3UTR	MIRT472736	1	1
hsa-let-7c-5p	NM_020776	KIAA1328	TGAGGTAGTAGGTTGTATGGTT#AGCCATCAGCCTGGCAGCTGCCCAT#((.((((((((((((.((((((#))))))))))))....)))))))).	2315	2340	1.0	-22.7	0	0.0001357625	0.441	0.27506192500000004	-0.09338370800000001	-5.728163000811725	20	25	12	3UTR	MIRT702486	0	0
hsa-let-7c-5p	NM_020786	PDP2	TGAGGTAGTAGGTTGTATGGTT#CCACACAATCCTTCTACCTCT#.(((((((.(((((((.(((..#))).)))).))).))))))).	2672	2693	1.0	-22.4	1	0.4456892	0.544	-0.10639762500000002	0.15681860750000004	-4.849714495602881	17	21	7	3UTR	MIRT284526	1	1
hsa-let-7c-5p	NM_021615	CHST6	TGAGGTAGTAGGTTGTATGGTT#GGCACAATCTCGGCTCACTGCAACCTCTGCCTCT#.(((((((.(((((((((((((#.))).)).))))))))))))))).	3901	3935	1.0	-24.9	1	0.004339563	0.441	-0.008539333333333328	-0.0632487025	-4.849714495602881	20	24	15	3UTR	MIRT051817	0	0
hsa-let-7c-5p	NM_021939	FKBP10	TGAGGTAGTAGGTTGTATGGTT#CCTGGAGGGCAGCCCTACCTCT#.(((((((..((((((......#.))))))))))))).	2260	2282	1.0	-19.3	1	6.316559e-07	0.338	-0.3510472714285714	-0.23832418750000006	-6.09222096393106	13	15	13	3UTR	MIRT051795	0	0
hsa-let-7c-5p	NM_025191	EDEM3	TGAGGTAGTAGGTTGTATGGTT#AGCCATCAGCCTTACTCCATCC#.((((.(((((((((.((((((#)))))))))))).))))).)).	3913	3935	1.0	-19.4	0	0.1254123	0.544	1.14550618	3.17802202	-5.927332678853777	19	22	12	3UTR	MIRT704029	1	1
hsa-let-7c-5p	NM_025205	MED28	TGAGGTAGTAGGTTGTATGGTT#GGCTCACTGCAACCTCTGCCTCC#.(((((((.(((((((((((((#))).)).))))))))))))))).	8896	8919	1.0	-24.2	1	0.002766653	0.426	-0.22463271999999998	0.08059307124999994	-4.849714495602881	20	23	15	3UTR	MIRT032187	1	1
hsa-let-7c-5p	NM_025205	MED28	TGAGGTAGTAGGTTGTATGGTT#CCAGAAGAACCTCTGCCTCC#.(((((((.(((((.(.(((..#)))..).)))))))))))).	3647	3667	1.0	-21.3	1	0.001544005	0.471	0.12527785714285714	0.11835784999999993	-5.585164055853516	16	20	12	3UTR	MIRT032187	1	1
hsa-let-7c-5p	NM_030806	C1orf21	TGAGGTAGTAGGTTGTATGGTT#CCATAAGCCTGCTAAAAAACAGAGATGATACCTCT#.(((((((((((((.(((((..#)))))))))))))................))))).	4324	4359	1.0	-20.3	1	0.01272298	0.603	0.4835743517241379	-0.005466517499999955	-4.528774397607753	18	35	13	3UTR	MIRT268837	0	0
hsa-let-7c-5p	NM_001145064	CASTOR2	TGAGGTAGTAGGTTGTATGGTT#GGCCAGTGCGGTTTCCCTTCCACTGCCTCAG#((((((((((((((((((((((#))))).)))))....)))...))))))))).	7586	7617	1.0	-21.6	1	0.002853651	0.471	0.04542990333333334	0.263512365	-3.937574446201665	22	31	9	3UTR	MIRT735616	0	0
hsa-let-7c-5p	NM_001145306	CDK6	TGAGGTAGTAGGTTGTATGGTT#TCATACCATCTCTGCCTTAT#((((((((.((((.((((((..#)))))).)))))))))))).	3079	3099	1.0	-20.0	1	0.1103712	0.603	0.74587675	0.6066412349999999	-5.850804021967834	18	20	12	3UTR	MIRT000407	1	0
hsa-let-7c-5p	NM_001159547	BEND4	TGAGGTAGTAGGTTGTATGGTT#GACCTACAGCTTTTGCCTGAG#(.((((((.((((((((.((((#)))))))))))))))))).).	4357	4378	1.0	-19.9	1	0.0006545863	0.485	0.49588019999999994	0.005258836249999999	-6.157639986462598	19	21	18	3UTR	MIRT549206	1	1
hsa-let-7c-5p	NM_001163446	CPA4	TGAGGTAGTAGGTTGTATGGTT#GATCTTGGCTCACCACAACCTCTGCCTCC#.(((((((.(((((((..(((.#.))))))))))))))))).	1793	1822	1.0	-23.8	1	0.0491033	0.426	0.3630764857142857	-0.09132179624999998	-4.849714495602881	17	19	17	3UTR	MIRT682608	1	1
hsa-let-7c-5p	NM_001163446	CPA4	TGAGGTAGTAGGTTGTATGGTT#GACCACAAGTTCCTAAGTAGAGCAAGAATTCATCAACCAGCTGCCTCT#.((((((((.(((((.((((..#.))))))))).)))))))).	2480	2528	1.0	-22.7	1	0.03763485	0.559	-0.03859836500000002	0.023400001249999997	-5.2688803859889095	17	20	9	3UTR	MIRT682608	1	1
hsa-let-7c-5p	NM_001164540	DISC1	TGAGGTAGTAGGTTGTATGGTT#GGCCCCGCAATCTCGGCTCACTGCAACCTCTACCTCC#.(((((((.(((((((((((((#.))).)).))))))))))))))).	5492	5529	1.0	-24.5	1	0.001094966	0.412	0.0	0.0	-4.849714495602881	20	24	15	3UTR	MIRT452945	0	0
hsa-let-7c-5p	NM_001164540	DISC1	TGAGGTAGTAGGTTGTATGGTT#AGCCATGGAACTTACTTGTTCACCTGGC#(.((((((((((((.(((((((#))))))).)))))))).....)))).).	6099	6127	1.0	-21.4	1	8.855879e-06	0.574	0.0	0.0	-5.8366998884674715	20	28	8	3UTR	MIRT452945	0	0
hsa-let-7c-5p	NM_001165931	RRM2	TGAGGTAGTAGGTTGTATGGTT#ATGCAGCCTCACTGCTTCAA#((((((((((((((((((....#))))))))).))))))))).	1723	1743	1.0	-24.1	1	0.001472693	0.632	0.6516859621052632	0.4850904629999998	-3.937574446201665	18	20	9	3UTR	MIRT297011	1	1
hsa-let-7c-5p	NM_001166393	MTUS1	TGAGGTAGTAGGTTGTATGGTT#CCAAAACTTATTACCTCC#.(((((((((((((...(((..#))).))))))))))))).	2929	2947	1.0	-19.4	1	0.1149331	0.603	3.1630678461538464	2.7715709425000004	-4.761823477911366	16	18	13	3UTR	MIRT472736	1	1
hsa-let-7c-5p	NM_001167741	MTX3	TGAGGTAGTAGGTTGTATGGTT#GGCTGGAGTGCAGTAGCGCAGTCTCGGCTCACTGCAACCTCTACCTCC#.(((((((.(((((((((((((#.))).)).))))))))))))))).	3430	3478	1.0	-24.5	1	0.00175282	0.412	-0.26317325333333336	0.26312119500000003	-4.849714495602881	20	24	15	3UTR	MIRT682446	0	0
hsa-let-7c-5p	NM_001167830	TMED5	TGAGGTAGTAGGTTGTATGGTT#AGCCATACACCTAATGTACGTCT#.((.(((.((((.(((((((((#)))))))))))))...))).)).	4403	4426	1.0	-20.5	0	0.01908693	0.574	0.4772203733333332	0.7525344719999999	-10.428112654163183	18	23	13	3UTR	MIRT466188	1	1
hsa-let-7c-5p	NM_001168683	TXLNG	TGAGGTAGTAGGTTGTATGGTT#ACTTCCAAGGGCTTTAAAGCAATGTGATTAACAGTACTTGGCCTGCTGCTTTT#.(((((((((((((((((.(((#.))).))))..))))))))))))).	3174	3227	1.0	-20.6	1	0.0001373948	0.632	1.3071083684210532	1.4051527595	-3.793324837357118	20	25	13	3UTR	MIRT259477	1	1
hsa-let-7c-5p	NM_001172704	GGA3	TGAGGTAGTAGGTTGTATGGTT#GCCACTCTACATCCTACTGCTTTG#.(((((((((((.((((((((.#))))...)))).))))))))))).	2120	2144	1.0	-22.8	1	0.08280857	0.441	4.003181781818181	3.8429442325	-5.08245545002336	19	24	11	3UTR	MIRT499495	0	1
hsa-let-7c-5p	NM_001174084	POLL	TGAGGTAGTAGGTTGTATGGTT#CCAGACAGGAGCAGGCTGCCACCCCTTCTACCTCAC#((((((((.(((.....((((.#.))))..))).)))))))).	2416	2452	1.0	-18.9	1	0.5624019	0.426	-0.8044083750000001	0.32739474749999997	-8.108433275188325	15	20	8	3UTR	MIRT735631	0	1
hsa-let-7c-5p	NM_001174126	SLC11A2	TGAGGTAGTAGGTTGTATGGTT#TATATGACCTCTCTGCCTTAT#((((((((.((((((((((...#))))))))))..)))))))).	3698	3719	1.0	-20.8	1	0.1394302	0.691	0.547424562	0.579881858375	-4.993964104447428	18	21	10	3UTR	MIRT461170	0	0
hsa-let-7c-5p	NM_001174127	SLC11A2	TGAGGTAGTAGGTTGTATGGTT#TATATGACCTCTCTGCCTTAT#((((((((.((((((((((...#))))))))))..)))))))).	3693	3714	1.0	-20.8	1	0.1394302	0.691	0.547424562	0.5941947208750001	-4.993964104447428	18	21	10	3UTR	MIRT461170	0	0
hsa-let-7c-5p	NM_001177591	PPP2R2A	TGAGGTAGTAGGTTGTATGGTT#CAACAGCTGCCTCAA#(((((((((..((((.......#)))).))))))))).	2745	2760	1.0	-18.1	1	0.1880993	0.676	1.7286503333333334	1.1347624315	-8.237904470243807	13	15	9	3UTR	MIRT322426	1	1
hsa-let-7c-5p	NM_001184906	FBXL20	TGAGGTAGTAGGTTGTATGGTT#GCCATGGCACAATCTCAGTTCACTGCAACCTCTGCCTCC#.(((((((.(((((((((((..#.))).))))))))))))))).	6613	6652	1.0	-23.8	1	0.0003000648	0.485	-0.3064808833333333	0.10612767099999999	-4.849714495602881	18	21	15	3UTR	MIRT548267	0	0
hsa-let-7c-5p	NM_001184906	FBXL20	TGAGGTAGTAGGTTGTATGGTT#AGGCATGCACCACTACTGCCTGGC#(.((((((((((.((((((.((#)).)))))).).))))))))).).	3038	3062	1.0	-21.8	1	0.0001194388	0.559	-0.9311427272727272	-0.0833857125	-6.3903809408830785	19	24	9	3UTR	MIRT548267	0	0
hsa-let-7c-5p	NM_001186	BACH1	TGAGGTAGTAGGTTGTATGGTT#TATAGCTTACTGCTTA#..(((((((((((((((.....#))))))))))))))).	5087	5103	1.0	-17.9	1	0.001400931	0.779	0.65072284	0.7317688003749999	-4.95700071937229	15	16	15	3UTR	MIRT084974	1	1
hsa-let-7c-5p	NM_005009	NME4	TGAGGTAGTAGGTTGTATGGTT#AGGACCAACTACCTCC#.((((((((.((((.(......#).)))).)))))))).	623	639	1.0	-18.8	1	0.004179161	0.412	0.772985325	-0.09233079000000001	-5.771280865935932	13	16	8	3UTR	MIRT051761	1	1
hsa-let-7c-5p	NM_005188	CBL	TGAGGTAGTAGGTTGTATGGTT#ACCACAACCTCTGCCTCC#.(((((((.(((((((..(((.#))))))))))))))))).	7719	7737	1.0	-23.3	1	0.1239553	0.441	-0.27339921428571434	0.00577095624999998	-4.849714495602881	17	18	17	3UTR	MIRT051757	1	0
hsa-let-7c-5p	NM_005585	SMAD6	TGAGGTAGTAGGTTGTATGGTT#AGCCCACCTGCTACCTTG#.(((((((((((.((...((((#))))))))))))))))).	3393	3411	1.0	-20.6	1	0.0002669376	0.456	-0.07984251818181819	-0.008574162499999982	-5.315504530326973	17	18	17	3UTR	MIRT439143	0	0
hsa-let-7c-5p	NM_005744	ARIH1	TGAGGTAGTAGGTTGTATGGTT#AGCTCAAGCGATCTGCCTGCCTCAG#((((((((((((((((.(((((#))).)).))))))))).))))))).	16877	16902	1.0	-23.9	1	0.001304543	0.471	-0.026556235294117648	-0.03768727499999999	-3.937574446201665	21	25	9	3UTR	MIRT559499	0	0
hsa-let-7c-5p	NM_005744	ARIH1	TGAGGTAGTAGGTTGTATGGTT#GACTCAAGCGACCCTCCTGCCTCAG#((((((((..((((((.(((((#))).)).))))))...)))))))).	13965	13990	1.0	-22.5	1	0.01016171	0.412	0.203379125	0.11208835000000003	-6.236470572775607	19	25	8	3UTR	MIRT559499	0	0
hsa-let-7c-5p	NM_005920	MEF2D	TGAGGTAGTAGGTTGTATGGTT#CCCTGCAGCCCTACCTCT#.(((((((..(((((((.((..#)).)))))))))))))).	4256	4274	1.0	-22.4	1	0.02550181	0.382	2.213747314285714	1.9396688738750003	-6.09222096393106	16	18	14	3UTR	MIRT735627	1	0
hsa-let-7c-5p	NM_006087	TUBB4A	TGAGGTAGTAGGTTGTATGGTT#CCATGCATCCTCCCTGCCTCAC#((((((((.(((.(((((((..#))))))).)))..)))))))).	2117	2139	1.0	-25.7	1	0.05852445	0.382	0.0	0.0	-6.283094717113671	18	22	8	3UTR	MIRT735640	0	0
hsa-let-7c-5p	NM_006315	PCGF3	TGAGGTAGTAGGTTGTATGGTT#GGCCCTGGGGCCTCTGCCTCT#.(((((((.(((((.((.((((#)))).)).)))))))))))).	3257	3278	1.0	-23.8	1	1.941143e-06	0.397	0.06920028571428573	0.20791553550000005	-5.585164055853516	18	21	12	3UTR	MIRT051823	1	1
hsa-let-7c-5p	NM_006315	PCGF3	TGAGGTAGTAGGTTGTATGGTT#ATATTACCTGTCTACCTCAA#(((((((((((((.((((....#)))).))))).)))))))).	2824	2844	1.0	-21.1	1	0.2271369	0.647	2.843506357142857	0.26471827425000005	-4.794414363722071	17	20	8	3UTR	MIRT051823	1	1
hsa-let-7c-5p	NM_006464	TGOLN2	TGAGGTAGTAGGTTGTATGGTT#GACCATGCTTCTTATATTATCTTC#.(((((((((((..((((((((#))))))))..)))))..)))))).	2699	2723	1.0	-18.7	1	0.1878282	0.618	-0.11625197692307693	0.19073217124999997	-5.9392953675437665	19	24	8	3UTR	MIRT573822	0	0
hsa-let-7c-5p	NM_006465	ARID3B	TGAGGTAGTAGGTTGTATGGTT#TCAATAAACCTCTACCTCT#.(((((((.(((((...(((..#)))...)))))))))))).	4201	4220	1.0	-18.9	1	0.03076479	0.681	0.0	0.0	-5.818213136157129	15	19	12	3UTR	MIRT073004	1	1
hsa-let-7c-5p	NM_006784	WDR3	TGAGGTAGTAGGTTGTATGGTT#CCATCAATGGCTTCTACCTCAG#((((((((.(((((((((((..#))))..))))))))))))))).	8978	9000	1.0	-20.4	1	0.03033654	0.529	0.0793452846153846	-0.13813340500000004	-4.993964104447428	19	22	15	3UTR	MIRT051837	0	0
hsa-let-7c-5p	NM_007192	SUPT16H	TGAGGTAGTAGGTTGTATGGTT#AACCTACCCTACTGCCA#...(((((((((..(((.((((#)))))))))))))))).	3650	3667	1.0	-20.1	0	0.3334177	0.529	4.75289888888889	5.466293055	-8.66051072386539	16	17	16	3UTR	MIRT051819	0	0
hsa-let-7c-5p	NM_012481	IKZF3	TGAGGTAGTAGGTTGTATGGTT#GGCTCAAGCAATCTGCCCACCTCAG#((((((.(((((((((.(((((#))).)).)))))))))..)))))).	6566	6591	1.0	-21.5	0	0.05188554	0.456	-0.0737298888888889	0.18614076250000003	-5.4812609810729835	20	25	9	3UTR	MIRT511388	0	1
hsa-let-7c-5p	NM_013274	POLL	TGAGGTAGTAGGTTGTATGGTT#CCAGACAGGAGCAGGCTGCCACCCCTTCTACCTCAC#((((((((.(((.....((((.#.))))..))).)))))))).	2353	2389	1.0	-18.9	1	0.5624019	0.426	-0.8044083750000001	0.430875986	-8.108433275188325	15	20	8	3UTR	MIRT735631	0	1
hsa-let-7c-5p	NM_013375	ABT1	TGAGGTAGTAGGTTGTATGGTT#CCATTTCCTGGCCCTGCTCTGCTTCCTGTCTACCTCAT#((((((((((((..(((.(((.#.))).)))..)))).)))))))).	867	905	1.0	-23.4	1	0.1024801	0.471	-0.0014989692307692153	-0.15645722874999995	-6.083544976388314	18	24	8	3UTR	MIRT100093	0	1
hsa-let-7c-5p	NM_013410	AK4	TGAGGTAGTAGGTTGTATGGTT#GATGATGAAATTTATTCCTGCTGCCTTAA#((((((((((((..(((.....#.))).)))))))))))).	2255	2284	1.0	-19.2	1	0.1383982	0.618	0.7049175249999999	0.40294389500000005	-6.083544976388314	15	18	12	3UTR	MIRT508934	0	0
hsa-let-7c-5p	NM_014001	GGA3	TGAGGTAGTAGGTTGTATGGTT#GCCACTCTACATCCTACTGCTTTG#.(((((((((((.((((((((.#))))...)))).))))))))))).	2954	2978	1.0	-22.8	1	0.08280857	0.441	3.170608090909091	3.2723667649999997	-5.08245545002336	19	24	11	3UTR	MIRT499495	0	1
hsa-let-7c-5p	NM_014089	NUP58	TGAGGTAGTAGGTTGTATGGTT#GGCCTACAACTTTTGCCTCAG#((((((((.((((((((.((((#)))))))))))))))))))).	2769	2790	1.0	-23.2	1	0.0277513	0.647	1.4114384999999998	0.8330570462499999	-4.993964104447428	20	21	20	3UTR	MIRT051820	0	0
hsa-let-7c-5p	NM_001621	AHR	TGAGGTAGTAGGTTGTATGGTT#GGCTCACTGCAACCTCTACCTCC#.(((((((.(((((((((((((#))).)).))))))))))))))).	4794	4817	1.0	-24.2	1	0.0003565984	0.456	0.0	0.0	-4.849714495602881	20	23	15	3UTR	MIRT482186	0	0
hsa-let-7c-5p	NM_001652	AQP6	TGAGGTAGTAGGTTGTATGGTT#GATCTCGGCTCACTGCAACCTCTACCTCC#.(((((((.(((((((((((((#.))).)).))))))))))))))).	1702	1731	1.0	-24.5	1	0.00422406	0.412	0.0	0.0	-4.849714495602881	20	24	15	3UTR	MIRT760994	0	0
hsa-let-7c-5p	NM_001761	CCNF	TGAGGTAGTAGGTTGTATGGTT#GGCCATGTGACCATGGCCTCT#.(((((.((.((((((((((((#)))))))))))))).))))).	3506	3527	1.0	-20.4	0	4.456507e-05	0.324	0.0	0.0	-6.5795178405566155	19	21	14	3UTR	MIRT051739	1	0
hsa-let-7c-5p	NM_002022	FMO4	TGAGGTAGTAGGTTGTATGGTT#ATCTTCTACCCTGCTACCTCAG#((((((((((((..(((.....#.))))))))))))))).	2245	2267	1.0	-21.6	1	0.09069591	0.647	0.0	0.0	-6.083544976388314	15	17	15	3UTR	MIRT617853	0	1
hsa-let-7c-5p	NM_002204	ITGA3	TGAGGTAGTAGGTTGTATGGTT#GCCGTGTCTCAGCCTCTGCCA#...(((((.((((((((((((.#))))))...))))))))))).	3967	3988	1.0	-21.0	0	0.005722235	0.368	0.17579057333333334	0.5415536375000003	-7.570929851924502	17	21	11	3UTR	MIRT682104	0	0
hsa-let-7c-5p	NM_002357	MXD1	TGAGGTAGTAGGTTGTATGGTT#CCAGCGCCTGCACCTCG#.(((((.(((((.(((.(((..#)))))))))))))))).	2479	2496	1.0	-20.0	0	0.000436871	0.412	0.0	0.0	-6.626141984894679	16	17	16	3UTR	MIRT303318	1	1
hsa-let-7c-5p	NM_002393	MDM4	TGAGGTAGTAGGTTGTATGGTT#GGCTCACTGCAACCTCTGCCTCC#.(((((((.(((((((((((((#))).)).))))))))))))))).	4874	4897	1.0	-24.2	1	0.002907259	0.412	0.0	0.0	-4.849714495602881	20	23	15	3UTR	MIRT112240	1	1
hsa-let-7c-5p	NM_002393	MDM4	TGAGGTAGTAGGTTGTATGGTT#ACCGCAACCTCTGCCTCC#.(((((((.(((((((..(((.#))))))))))))))))).	4326	4344	1.0	-23.6	1	0.002025972	0.397	0.0	0.0	-4.849714495602881	17	18	17	3UTR	MIRT112240	1	1
hsa-let-7c-5p	NM_002393	MDM4	TGAGGTAGTAGGTTGTATGGTT#AGCCATGCCAGCCTCCACACTGCCA#...(((((((((((((((((((#)))))))).)))))....)))))).	5847	5872	1.0	-23.3	0	0.009191007	0.529	0.0	0.0	-6.514540193678739	19	25	8	3UTR	MIRT112240	1	1
hsa-let-7c-5p	NM_002524	NRAS	TGAGGTAGTAGGTTGTATGGTT#GCTCCTGCTACTTCC#.(((((((((((..((......#)).))))))))))).	817	832	1.0	-17.6	1	0.00268181	0.544	3.6267910000000003	3.4594429612500006	-5.9392953675437665	13	15	11	3UTR	MIRT004531	1	1
hsa-let-7c-5p	NM_002906	RDX	TGAGGTAGTAGGTTGTATGGTT#AGCATATAAAAACATCAGTCCCGAGGAGGGGACAACAATACTACCTCAC#((((((((((.(((((......#.)))))..)))))))))).	2897	2946	1.0	-21.0	1	0.2286972	0.544	0.0	0.0	-6.7623489216120145	15	19	10	3UTR	MIRT521391	1	1
hsa-let-7c-5p	NM_003246	THBS1	TGAGGTAGTAGGTTGTATGGTT#GACACAATCTCGGCTCACTGCAACCTCTGCCTCC#.(((((((.(((((((((((((#.))).)).))))))))))))))).	7302	7336	1.0	-24.5	1	0.004866994	0.412	0.0	0.0	-4.849714495602881	20	24	15	3UTR	MIRT500817	1	1
hsa-let-7c-5p	NM_003333	UBA52	TGAGGTAGTAGGTTGTATGGTT#TACAACCTCTGCCTCC#.(((((((.((((((((.....#))))))))))))))).	1098	1114	1.0	-22.9	1	0.05646785	0.382	0.0	0.0	-4.849714495602881	15	16	15	3UTR	MIRT051853	0	0
hsa-let-7c-5p	NM_003333	UBA52	TGAGGTAGTAGGTTGTATGGTT#GGCTCACTGCAGCTTCTGCCTCT#.(((((((.(((((((((((((#))).)).))))))))))))))).	2006	2029	1.0	-21.9	1	0.0003351819	0.382	0.0	0.0	-4.849714495602881	20	23	15	3UTR	MIRT051853	0	0
hsa-let-7c-5p	NM_003373	VCL	TGAGGTAGTAGGTTGTATGGTT#GGCTGCAGTGCAGTGGTGCAATCTCAGCTCACTGCAACCTCTGCCTCC#.(((((((.(((((((((((((#.))).)).))))))))))))))).	5685	5733	1.0	-24.6	1	0.001904102	0.412	0.0	0.0	-4.849714495602881	20	24	15	3UTR	MIRT464267	0	0
hsa-let-7c-5p	NM_003406	YWHAZ	TGAGGTAGTAGGTTGTATGGTT#AGCCAATTTGGAAGCTGCTATCTTAG#(((((((((((.((.(((((((#)))))...)).)).))))))))))).	4397	4423	1.0	-20.3	1	0.0007310466	0.632	0.0	0.0	-8.019827316048655	20	26	11	3UTR	MIRT463664	0	0
hsa-let-7c-5p	NM_003417	ZNF264	TGAGGTAGTAGGTTGTATGGTT#GGCTCTCTGCAACCTCTGCCTCC#.(((((((.((((((((.((((#))))...))))))))))))))).	6803	6826	1.0	-23.7	1	0.005534929	0.441	0.0	0.0	-4.849714495602881	19	23	15	3UTR	MIRT294444	0	0
hsa-let-7c-5p	NM_003417	ZNF264	TGAGGTAGTAGGTTGTATGGTT#GGCTCAAGCAACCTGCTTGCCTGGG#(.((((((((((((((.(((((#))).)).)))))))))).)))).).	3898	3923	1.0	-22.9	1	0.0001237656	0.426	0.0	0.0	-5.101250328216836	20	25	10	3UTR	MIRT294444	0	0
hsa-let-7c-5p	NM_003417	ZNF264	TGAGGTAGTAGGTTGTATGGTT#GGCTCACAGCAGCCTCTGCCTCC#.(((((((.(((((((......#.)))))))))))))).	10436	10459	1.0	-22.3	1	0.000354816	0.368	0.0	0.0	-4.849714495602881	14	16	14	3UTR	MIRT294444	0	0
hsa-let-7c-5p	NM_003483	HMGA2	TGAGGTAGTAGGTTGTATGGTT#AATCAAAACACACTACTACCTCT#.((((((((((..(((.(((((#)))))..)))..)))))))))).	3623	3646	1.0	-21.6	1	0.2271053	0.647	0.0	0.0	-8.429258759619717	18	23	10	3UTR	MIRT002322	1	1
hsa-let-7c-5p	NM_003582	DYRK3	TGAGGTAGTAGGTTGTATGGTT#ATACTCCTACTACTTTG#.(((((((((((..((((....#)))).))))))))))).	7081	7098	1.0	-18.1	1	0.04643035	0.618	0.0	0.0	-5.9392953675437665	15	17	11	3UTR	MIRT735619	0	0
hsa-let-7c-5p	NM_003729	RTCA	TGAGGTAGTAGGTTGTATGGTT#TCAAGCAATTCTACTGCCTCAG#((((((((((((((((.(((..#))).))))).))))))))))).	1781	1803	1.0	-23.7	1	0.004876229	0.485	1.1738389999999999	1.07374337375	-3.937574446201665	19	22	11	3UTR	MIRT032189	1	0
hsa-let-7c-5p	NM_003745	SOCS1	TGAGGTAGTAGGTTGTATGGTT#AACTCGCACCTCCTACCTCT#.(((((((.(((.(((..((((#)))).)))))).))))))).	1073	1093	1.0	-18.7	1	0.3146288	0.529	1.4318107142857142	0.8472673100000001	-6.138845108269123	17	20	7	3UTR	MIRT492218	1	1
hsa-let-7c-5p	NM_003750	EIF3A	TGAGGTAGTAGGTTGTATGGTT#GGCCATACAACTCTGTCTACTC#...(((((((((((((((((((#))))))))))).))).))))).	6161	6183	1.0	-22.8	0	0.1852101	0.574	0.0	0.0	-6.514540193678739	19	22	11	3UTR	MIRT051776	0	0
hsa-let-7c-5p	NM_004231	ATP6V1F	TGAGGTAGTAGGTTGTATGGTT#GACCATCTCCCTCCACTACCTCT#.(((((((((((..(.((((((#)))))))..)))..)))))))).	590	613	1.0	-22.1	1	0.4843952	0.5	0.07368338461538462	0.13696707462500002	-6.1723444478473795	18	23	8	3UTR	MIRT402055	0	0
hsa-let-7c-5p	NM_004298	NUP155	TGAGGTAGTAGGTTGTATGGTT#AGCCTGGAGTGCAGTGGTGCGATCCCGGCTCACTGCAACCTCTGCCTCAC#((((((((.(((((((((((((#.))).)).)))))))))))))))).	5907	5957	1.0	-25.8	1	0.0006476285	0.412	0.0	0.0	-4.993964104447428	21	25	16	3UTR	MIRT506361	1	0
hsa-let-7c-5p	NM_004423	DVL3	TGAGGTAGTAGGTTGTATGGTT#GCCTGCTGCCTCAG#(((((((((((((.........#))))))))))))).	2935	2949	1.0	-22.7	1	0.011586	0.412	-0.1409743846153846	-0.03949876062499996	-5.762913004276319	13	14	13	3UTR	MIRT523987	1	1
hsa-let-7c-5p	NM_004438	EPHA4	TGAGGTAGTAGGTTGTATGGTT#CCAGCCAACTTACTGCCA#...((((((((((((..(((..#)))..)))))))))))).	5212	5230	1.0	-22.5	0	0.06620635	0.603	1.426987425	1.4131405087500002	-6.747589273982352	15	18	12	3UTR	MIRT548344	1	1
hsa-let-7c-5p	NM_004537	NAP1L1	TGAGGTAGTAGGTTGTATGGTT#AATTGAACAGCCTATGTCCTCAG#(((((..(((((((((......#.)))))))))..))))).	11301	11324	1.0	-22.3	0	0.00131599	0.603	0.0	0.0	-7.382219742266031	14	18	9	3UTR	MIRT712371	1	1
hsa-let-7c-5p	NM_004537	NAP1L1	TGAGGTAGTAGGTTGTATGGTT#ACTGTTTACCTAACTACCTCAT#(((((((((((((...(((((.#)))))..))))).)))))))).	2502	2524	1.0	-20.4	1	0.00421968	0.676	2.7048975	2.03910561	-5.762913004276319	18	22	8	3UTR	MIRT712371	1	1
hsa-let-7c-5p	NM_203390	RBM12B	TGAGGTAGTAGGTTGTATGGTT#GACCACTGACTCCAGTTCATGCTTTTGCTGCCTCAC#((((((((((((..((((((..#.)))))).)))))))))))).	4525	4561	1.0	-22.1	1	0.01469671	0.618	0.27262573333333334	0.42148585375000003	-6.083544976388314	18	21	12	3UTR	MIRT543787	0	0
hsa-let-7c-5p	NM_203464	AK4	TGAGGTAGTAGGTTGTATGGTT#GATGATGAAATTTATTCCTGCTGCCTTAA#((((((((((((..(((.....#.))).)))))))))))).	2294	2323	1.0	-19.2	1	0.1383982	0.618	0.29064565833333333	0.46756773250000017	-6.083544976388314	15	18	12	3UTR	MIRT508934	0	0
hsa-let-7c-5p	NM_206866	BACH1	TGAGGTAGTAGGTTGTATGGTT#TATAGCTTACTGCTTA#..(((((((((((((((.....#))))))))))))))).	5279	5295	1.0	-17.9	1	0.001400931	0.779	0.65072284	0.7317688003749999	-4.95700071937229	15	16	15	3UTR	MIRT084974	1	1
hsa-let-7c-5p	XM_005247590	CDV3	TGAGGTAGTAGGTTGTATGGTT#ACCTCAGATTTGCTGCACTCAT#((((((((((((((....(((.#)))...)))))))))).)))).	1465	1487	1.0	-18.3	1	0.02550835	0.559	0.0	0.0	-4.906073086755913	17	22	10	3UTR	MIRT255312	1	1
hsa-let-7c-5p	XM_005249996	RAB19	TGAGGTAGTAGGTTGTATGGTT#AGCTGGAGTATAGTGGTGGGATCTTGGCTCACTGCAACCTCTACCTCC#.(((((((.(((((((((((((#.))).)).))))))))))))))).	1555	1603	1.0	-24.4	1	0.01604808	0.456	0.0	0.0	-4.849714495602881	20	24	15	3UTR	MIRT681740	0	0
hsa-let-7c-5p	XM_005251061	YWHAZ	TGAGGTAGTAGGTTGTATGGTT#AGCCAATTTGGAAGCTGCTATCTTAG#(((((((((((.((.(((((((#)))))...)).)).))))))))))).	4802	4828	1.0	-20.3	1	0.0007310466	0.632	0.0	0.0	-8.019827316048655	20	26	11	3UTR	MIRT463664	0	0
hsa-let-7c-5p	XM_005251063	YWHAZ	TGAGGTAGTAGGTTGTATGGTT#AGCCAATTTGGAAGCTGCTATCTTAG#(((((((((((.((.(((((((#)))))...)).)).))))))))))).	4848	4874	1.0	-20.3	1	0.0007310466	0.632	0.0	0.0	-8.019827316048655	20	26	11	3UTR	MIRT463664	0	0
hsa-let-7c-5p	XM_005258317	KIAA1328	TGAGGTAGTAGGTTGTATGGTT#AGCCATCAGCCTGGCAGCTGCCCAT#((.((((((((((((.((((((#))))))))))))....)))))))).	2717	2742	1.0	-22.7	0	0.0001357625	0.441	0.0	0.0	-5.728163000811725	20	25	12	3UTR	MIRT702486	0	0
hsa-let-7c-5p	XM_005258318	KIAA1328	TGAGGTAGTAGGTTGTATGGTT#AGCCATCAGCCTGGCAGCTGCCCAT#((.((((((((((((.((((((#))))))))))))....)))))))).	2666	2691	1.0	-22.7	0	0.0001357625	0.441	0.0	0.0	-5.728163000811725	20	25	12	3UTR	MIRT702486	0	0
hsa-let-7c-5p	XM_005266600	NUP58	TGAGGTAGTAGGTTGTATGGTT#GGCCTACAACTTTTGCCTCAG#((((((((.((((((((.((((#)))))))))))))))))))).	2670	2691	1.0	-23.2	1	0.0277513	0.647	0.0	0.0	-4.993964104447428	20	21	20	3UTR	MIRT051820	0	0
hsa-let-7c-5p	XM_005268244	AREL1	TGAGGTAGTAGGTTGTATGGTT#GGCCATGGCACTGGACTGCCTCT#.((((((((.(((..(((((((#)))))))..)))..)))))))).	3273	3296	1.0	-22.6	1	0.0008026234	0.574	0.0	0.0	-6.628120783456338	18	23	8	3UTR	MIRT481654	0	0
hsa-let-7c-5p	XM_006711334	MEF2D	TGAGGTAGTAGGTTGTATGGTT#CCCTGCAGCCCTACCTCT#.(((((((..(((((((.((..#)).)))))))))))))).	4232	4250	1.0	-22.4	1	0.02550181	0.382	0.0	0.0	-6.09222096393106	16	18	14	3UTR	MIRT735627	1	0
hsa-let-7c-5p	XM_006711334	MEF2D	TGAGGTAGTAGGTTGTATGGTT#ACCAGTTTTGCCCTCTGCCTCAT#((((((((..(((....((((.#)))).....)))..)))))))).	4794	4817	1.0	-21.9	1	0.001178128	0.544	0.0	0.0	-8.061809130850262	15	23	8	3UTR	MIRT735627	1	0
hsa-let-7c-5p	XM_006717130	PBX3	TGAGGTAGTAGGTTGTATGGTT#GTGCTCACTTACTACCTCT#.((((((((((((.((((....#))))..)))))))))))).	2350	2369	1.0	-21.8	1	0.006023911	0.588	0.0	0.0	-4.650164754877524	16	19	12	3UTR	MIRT439151	1	1
hsa-let-7c-5p	XM_006717777	POLL	TGAGGTAGTAGGTTGTATGGTT#CCAGACAGGAGCAGGCTGCCACCCCTTCTACCTCAC#((((((((.(((.....((((.#.))))..))).)))))))).	2055	2091	1.0	-18.9	1	0.5624019	0.426	0.0	0.0	-8.108433275188325	15	20	8	3UTR	MIRT735631	0	1
hsa-let-7c-5p	XM_006720344	AREL1	TGAGGTAGTAGGTTGTATGGTT#GGCCATGGCACTGGACTGCCTCT#.((((((((.(((..(((((((#)))))))..)))..)))))))).	3470	3493	1.0	-22.6	1	0.0008026234	0.574	0.0	0.0	-6.628120783456338	18	23	8	3UTR	MIRT481654	0	0
hsa-let-7c-5p	XM_011517029	RBM12B	TGAGGTAGTAGGTTGTATGGTT#GACCACTGACTCCAGTTCATGCTTTTGCTGCCTCAC#((((((((((((..((((((..#.)))))).)))))))))))).	4476	4512	1.0	-22.1	1	0.01469671	0.618	0.0	0.0	-6.083544976388314	18	21	12	3UTR	MIRT543787	0	0
hsa-let-7c-5p	XM_011528964	BCL2L1	TGAGGTAGTAGGTTGTATGGTT#TATGGCCTCAGCTGCCTCAC#(((((((((((((((((.....#))))))))..))))))))).	1673	1693	1.0	-21.0	1	0.00189519	0.456	0.0	0.0	-3.937574446201665	17	20	9	3UTR	MIRT004491	1	1
hsa-let-7c-5p	XM_011537415	AREL1	TGAGGTAGTAGGTTGTATGGTT#GGCCATGGCACTGGACTGCCTCT#.((((((((.(((..(((((((#)))))))..)))..)))))))).	3593	3616	1.0	-22.6	1	0.0008026234	0.574	0.0	0.0	-6.628120783456338	18	23	8	3UTR	MIRT481654	0	0
hsa-let-7c-5p	XM_011539651	POLL	TGAGGTAGTAGGTTGTATGGTT#CCAGACAGGAGCAGGCTGCCACCCCTTCTACCTCAC#((((((((.(((.....((((.#.))))..))).)))))))).	2047	2083	1.0	-18.9	1	0.5624019	0.426	0.0	0.0	-8.108433275188325	15	20	8	3UTR	MIRT735631	0	1
hsa-let-7c-5p	XM_011539654	POLL	TGAGGTAGTAGGTTGTATGGTT#CCAGACAGGAGCAGGCTGCCACCCCTTCTACCTCAC#((((((((.(((.....((((.#.))))..))).)))))))).	1792	1828	1.0	-18.9	1	0.5624019	0.426	0.0	0.0	-8.108433275188325	15	20	8	3UTR	MIRT735631	0	1
hsa-let-7c-5p	XM_017002491	ZNF644	TGAGGTAGTAGGTTGTATGGTT#ACTCCAGTTGCATTTCTCAGACAATAAAGTGGTGCATCCATGCTACCTCC#.(((((((((((.(((((.(..#.).))))).)).))))))))).	4886	4936	1.0	-22.2	1	0.01579386	0.603	0.0	0.0	-5.08245545002336	17	22	9	3UTR	MIRT505018	1	1
hsa-let-7c-5p	XM_017008690	SLC10A7	TGAGGTAGTAGGTTGTATGGTT#CCAGGGTGGTCTCAAACTCCTGAGCTCAGGCAATCTGCCTGCCTCAT#((((((((((((((((.(((((#.))).)).))))))))).))))))).	4449	4496	1.0	-24.4	1	0.01388605	0.5	0.0	0.0	-3.937574446201665	21	26	9	3UTR	MIRT501172	1	1
hsa-let-7c-5p	XM_017013408	RBM12B	TGAGGTAGTAGGTTGTATGGTT#GACCACTGACTCCAGTTCATGCTTTTGCTGCCTCAC#((((((((((((..((((((..#.)))))).)))))))))))).	4543	4579	1.0	-22.1	1	0.01469671	0.618	0.0	0.0	-6.083544976388314	18	21	12	3UTR	MIRT543787	0	0
hsa-let-7c-5p	NM_001077619	UBXN2B	TGAGGTAGTAGGTTGTATGGTT#ACCGCAACCTCCGCCTCC#.(((((.(.(((((((..(((.#))))))))))).))))).	1717	1735	1.0	-19.3	0	0.009535675	0.471	0.18243396	0.12292310100000003	-6.3934010304742	16	18	11	3UTR	MIRT240328	0	0
hsa-let-7c-5p	NM_001079673	FNDC3A	TGAGGTAGTAGGTTGTATGGTT#CCATAAGTTTCTGCTGCTTCT#.(((((((((((...(((((..#)))))....))))))))))).	4847	4868	1.0	-20.6	1	0.007471091	0.559	1.720968181818182	1.0489709275	-6.674744927794402	16	21	11	3UTR	MIRT068787	1	1
hsa-let-7c-5p	NM_001105545	ECHDC1	TGAGGTAGTAGGTTGTATGGTT#CTATACAAAACCTATTCCTGGC#(.(((.((((((((((((((..#)))))))..)))))))))).).	1212	1234	1.0	-18.1	0	0.04588554	0.676	4.0559409	2.66535761125	-7.002209089409883	18	22	10	3UTR	MIRT549849	0	1
hsa-let-7c-5p	NM_001122770	ZBTB37	TGAGGTAGTAGGTTGTATGGTT#GACTCAAGCAATCCTCCTACCTCAT#((((((((.(((((((.(((((#))).)).)))).))).)))))))).	10833	10858	1.0	-22.3	1	0.4417101	0.426	0.0	0.0	-4.993964104447428	20	25	8	3UTR	MIRT574365	1	0
hsa-let-7c-5p	NM_001122770	ZBTB37	TGAGGTAGTAGGTTGTATGGTT#TCATATGGCCTACACCA#...(((.(((((((((((((..#)))))))))))))))).	8867	8884	1.0	-20.3	0	0.001561706	0.676	0.0	0.0	-8.058226728550057	16	17	16	3UTR	MIRT574365	1	0
hsa-let-7c-5p	NM_001127223	CD59	TGAGGTAGTAGGTTGTATGGTT#ACCAGTCATGCCTACTGGCTCT#.(((.((((((((((..((((.#))))..)).)))))))).))).	3154	3176	1.0	-23.7	0	3.796083e-06	0.441	0.16142454545454546	0.19329483662500002	-8.145411092473203	17	22	8	3UTR	MIRT512746	0	1
hsa-let-7c-5p	NM_001127691	RHD	TGAGGTAGTAGGTTGTATGGTT#ACCATCTTGGCTCACTGCAACCTCTACCTCC#.(((((((.(((((((((((((#.))).)).))))))))))))))).	1386	1417	1.0	-24.4	1	0.02089599	0.441	0.023477533333333345	-0.0008965125000000088	-4.849714495602881	20	24	15	3UTR	MIRT453403	0	0
hsa-let-7c-5p	NM_001128923	SH3D19	TGAGGTAGTAGGTTGTATGGTT#GAGCATATCAGCCTTATTACCA#...((((((((((((((((.((#)).)))).)))))).)))))).	3764	3786	1.0	-19.4	0	0.03672448	0.618	1.379	1.7981749999999996	-6.514540193678739	18	22	6	3UTR	MIRT051806	0	0
hsa-let-7c-5p	NM_001128924	SH3D19	TGAGGTAGTAGGTTGTATGGTT#GAGCATATCAGCCTTATTACCA#...((((((((((((((((.((#)).)))).)))))).)))))).	2855	2877	1.0	-19.4	0	0.03672448	0.618	2.3284364444444443	2.9984011099999996	-6.514540193678739	18	22	6	3UTR	MIRT051806	0	0
hsa-let-7c-5p	NM_001130723	AHCYL2	TGAGGTAGTAGGTTGTATGGTT#GACCAAAAATCATAACCTGCTGTTTCTCAG#((((((((((((((((.(((((#)))))......)))))))))))..))))).	3641	3671	1.0	-19.9	1	0.001534601	0.588	0.8035122611111113	0.3427589762500001	-3.937574446201665	21	30	11	3UTR	MIRT482222	0	0
hsa-let-7c-5p	NM_001130841	RTCA	TGAGGTAGTAGGTTGTATGGTT#GCCTCCCGGGTTCAAGCAATTCTACTGCCTCAG#((((((((((((((((.(((..#.))).))))).))))))))))).	1809	1842	1.0	-23.7	1	0.004876229	0.485	-0.20988970588235295	0.029011761250000018	-3.937574446201665	19	23	11	3UTR	MIRT032189	1	0
hsa-let-7c-5p	NM_001130841	RTCA	TGAGGTAGTAGGTTGTATGGTT#TCAAGCAATTCTACTGCCTCAG#((((((((((((((((.(((..#))).))))).))))))))))).	1820	1842	1.0	-23.7	1	0.004876229	0.485	-0.04228152941176471	-0.009657727500000006	-3.937574446201665	19	22	11	3UTR	MIRT032189	1	0
hsa-let-7c-5p	NM_001135699	YWHAZ	TGAGGTAGTAGGTTGTATGGTT#AGCCAATTTGGAAGCTGCTATCTTAG#(((((((((((.((.(((((((#)))))...)).)).))))))))))).	4429	4455	1.0	-20.3	1	0.0007310466	0.632	0.0	0.0	-8.019827316048655	20	26	11	3UTR	MIRT463664	0	0
hsa-let-7c-5p	NM_001142285	RPS24	TGAGGTAGTAGGTTGTATGGTT#ACCATCTTGGCTCACTGCAACCTCTGCTTCC#.(((((((.(((((((((((((#.))).)).))))))))))))))).	1712	1743	1.0	-21.7	1	0.002612316	0.426	-0.42665126666666675	-0.332449636	-4.849714495602881	20	24	15	3UTR	MIRT051855	0	0
hsa-let-7c-5p	NM_032186	ZNF644	TGAGGTAGTAGGTTGTATGGTT#ACTCCAGTTGCATTTCTCAGACAATAAAGTGGTGCATCCATGCTACCTCC#.(((((((((((.(((((.(..#.).))))).)).))))))))).	1077	1127	1.0	-22.2	1	0.01579386	0.603	3.9465508333333332	3.2631149502499994	-5.08245545002336	17	22	9	3UTR	MIRT505018	1	1
hsa-let-7c-5p	NM_032486	DCTN5	TGAGGTAGTAGGTTGTATGGTT#GGCCATACTGACCTGTGCCA#...((((.((((((((((((((#)))))))).)))))))))).	5484	5504	1.0	-21.8	0	0.01506617	0.529	-0.06474959333333334	-0.09193830875000002	-8.82817512285937	18	20	10	3UTR	MIRT051842	0	0
hsa-let-7c-5p	NM_032522	ZBTB37	TGAGGTAGTAGGTTGTATGGTT#GACTCAAGCAATCTGCCTGCCTCAG#((((((((((((((((.(((((#))).)).))))))))).))))))).	3592	3617	1.0	-24.6	1	0.005034891	0.471	0.012000831764705906	-0.03467572200000001	-3.937574446201665	21	25	9	3UTR	MIRT574365	1	0
hsa-let-7c-5p	NM_032522	ZBTB37	TGAGGTAGTAGGTTGTATGGTT#GATGGTATAACCTACTGCA#....((((((((((((((.(((#))).)))))))))))))).	4619	4638	1.0	-22.9	0	0.01924206	0.662	0.17655664285714293	0.04021911250000005	-9.546562468637928	17	19	14	3UTR	MIRT574365	1	0
hsa-let-7c-5p	NM_032522	ZBTB37	TGAGGTAGTAGGTTGTATGGTT#GACTCAAGCAATCCTCCTACCTCAT#((((((((.(((((((.(((((#))).)).)))).))).)))))))).	22902	22927	1.0	-22.3	1	0.4417101	0.426	0.073467125	0.1062750825	-4.993964104447428	20	25	8	3UTR	MIRT574365	1	0
hsa-let-7c-5p	NM_032664	FUT10	TGAGGTAGTAGGTTGTATGGTT#CCATGTCCGTGTCTGTGGACCCACATACTTACTGCCTTT#.(((((((((((((((..((((#.)))).))).)))))))))))).	2030	2069	1.0	-21.7	1	0.002255282	0.544	3.8939058125000003	2.85621607875	-3.793324837357118	19	23	12	3UTR	MIRT051863	0	0
hsa-let-7c-5p	NM_032828	ZNF587	TGAGGTAGTAGGTTGTATGGTT#GGCTCACTGCAACCTCTGCCTCC#.(((((((.(((((((((((((#))).)).))))))))))))))).	2694	2717	1.0	-24.2	1	0.01256908	0.471	0.19126935999999997	0.007911104625000012	-4.849714495602881	20	23	15	3UTR	MIRT457679	0	1
hsa-let-7c-5p	NM_032828	ZNF587	TGAGGTAGTAGGTTGTATGGTT#AGCTCATTGCAACCTCTGCTTCC#.(((((((.(((((((((((((#))).))).)))))))))))))).	3167	3190	1.0	-21.6	1	0.01705784	0.412	0.1407514666666666	0.0015119499999999356	-4.849714495602881	20	23	14	3UTR	MIRT457679	0	1
hsa-let-7c-5p	NM_032837	FAM104A	TGAGGTAGTAGGTTGTATGGTT#AATTAACTGCCATACTACCTCT#.((((((((((((.((......#.)).))).))))))))).	1126	1148	1.0	-19.7	1	0.007343894	0.647	0.4540331923076921	1.0401400450000002	-4.650164754877524	14	18	9	3UTR	MIRT574789	1	1
hsa-let-7c-5p	NM_032875	FBXL20	TGAGGTAGTAGGTTGTATGGTT#GCCATGGCACAATCTCAGTTCACTGCAACCTCTGCCTCC#.(((((((.(((((((((((..#.))).))))))))))))))).	6709	6748	1.0	-23.8	1	0.0003000648	0.485	-0.10607741666666666	0.03665441774999999	-4.849714495602881	18	21	15	3UTR	MIRT548267	0	0
hsa-let-7c-5p	NM_032875	FBXL20	TGAGGTAGTAGGTTGTATGGTT#AGGCATGCACCACTACTGCCTGGC#(.((((((((((.((((((.((#)).)))))).).))))))))).).	3134	3158	1.0	-21.8	1	0.0001194388	0.559	-0.09354990909090914	0.16376520599999994	-6.3903809408830785	19	24	9	3UTR	MIRT548267	0	0
hsa-let-7c-5p	NM_032932	RAB11FIP4	TGAGGTAGTAGGTTGTATGGTT#GCCATATTCTCTGCTACCCAC#((.(((((((((..(((((((.#)))))))..))))))))))).	7155	7176	1.0	-21.7	0	0.04447546	0.515	-0.48415788888888894	-0.14882223499999997	-7.641084450694762	18	21	11	3UTR	MIRT501444	1	1
hsa-let-7c-5p	NM_033089	ZCCHC3	TGAGGTAGTAGGTTGTATGGTT#AGCCCGGTGCTCATTCCACTACCTCT#.((((((((.((..((((((((#))))..)))).....)))))))))).	2083	2109	1.0	-19.1	1	0.1284456	0.485	1.67617273	1.4160183950000003	-7.181801835871946	18	26	10	3UTR	MIRT083298	0	0
hsa-let-7c-5p	NM_080660	ZC3HAV1L	TGAGGTAGTAGGTTGTATGGTT#GGCTCAAGCGATCTGCCTGCTTCAG#((((((((((((((((.(((((#))).)).))))))))).))))))).	1550	1575	1.0	-21.1	1	0.001417469	0.441	0.33659215294117645	0.15699382749999996	-3.937574446201665	21	25	9	3UTR	MIRT463421	1	0
hsa-let-7c-5p	NM_138400	NOM1	TGAGGTAGTAGGTTGTATGGTT#GCAGTGTCCTGTAATCTCAGCTCACTGCAACCTCTACCTCC#.(((((((.(((((((((((((#.))).)).))))))))))))))).	3365	3406	1.0	-24.6	1	0.002271393	0.441	-0.5283263333333333	-0.11569268750000004	-4.849714495602881	20	24	15	3UTR	MIRT460455	0	0
hsa-let-7c-5p	NM_144775	SMCR8	TGAGGTAGTAGGTTGTATGGTT#AACCTTTGCAACCACTTCACTACCTCT#.((((((((.(((((((.((((#))))..))))))).....)))))))).	4303	4330	1.0	-23.3	1	0.1119999	0.456	1.9838582500000002	-0.3503083549999999	-5.035831305685297	19	27	8	3UTR	MIRT076221	1	1
hsa-let-7c-5p	NM_147163	PSMG2	TGAGGTAGTAGGTTGTATGGTT#ACCTTATACCCAAAACACTTACTACCA#...(((((((((.(((.(((..#.)))..)))))))))))).	791	818	1.0	-17.9	0	0.1783561	0.706	-0.21588771111111113	1.0167347949999996	-7.803670806344982	15	19	12	3UTR	MIRT051798	0	0
hsa-let-7c-5p	NM_001291858	IGF1R	TGAGGTAGTAGGTTGTATGGTT#CCATGCAACCTCCTTCTGCCA#...(((((.(((((((((((..#)))))))))))....))))).	9284	9305	1.0	-23.0	0	0.001788303	0.515	1.2754481363636365	1.5520529574999995	-7.570929851924502	16	21	11	3UTR	MIRT053087	1	1
hsa-let-7c-5p	NM_001291858	IGF1R	TGAGGTAGTAGGTTGTATGGTT#GGCCATTTGCTTACATGCCTCGT#(((((((((((((...((((((#))))))..)))))).))))))).	11384	11407	1.0	-21.3	1	0.002392126	0.544	0.22245470000000003	0.314270145	-5.762913004276319	19	23	7	3UTR	MIRT053087	1	1
hsa-let-7c-5p	NM_001300842	SLC10A7	TGAGGTAGTAGGTTGTATGGTT#GGCCAAAAGCAGCCTGTTACATCC#.((.((((((((((((.(((((#)))))...)))))))))))).)).	2284	2308	1.0	-19.0	0	0.01213827	0.544	1.2908758333333334	0.92696835875	-6.825347112316308	19	24	12	3UTR	MIRT501172	1	1
hsa-let-7c-5p	NM_001303542	RAB11FIP4	TGAGGTAGTAGGTTGTATGGTT#GCCATATTCTCTGCTACCCAC#((.(((((((((..(((((((.#)))))))..))))))))))).	6806	6827	1.0	-21.7	0	0.04447546	0.515	-0.48415788888888894	-0.14882223499999997	-7.641084450694762	18	21	11	3UTR	MIRT501444	1	1
hsa-let-7c-5p	NM_001304536	EPHA4	TGAGGTAGTAGGTTGTATGGTT#CCAGCCAACTTACTGCCA#...((((((((((((..(((..#)))..)))))))))))).	5431	5449	1.0	-22.5	0	0.06620635	0.603	3.3708398583333334	5.0147869075	-6.747589273982352	15	18	12	3UTR	MIRT548344	1	1
hsa-let-7c-5p	NM_001307939	ARID3B	TGAGGTAGTAGGTTGTATGGTT#TCAATAAACCTCTACCTCT#.(((((((.(((((...(((..#)))...)))))))))))).	4204	4223	1.0	-18.9	1	0.03076479	0.681	4.155655714285715	3.61061522125	-5.818213136157129	15	19	12	3UTR	MIRT073004	1	1
hsa-let-7c-5p	NM_001317816	SLC10A7	TGAGGTAGTAGGTTGTATGGTT#GGCCAAAAGCAGCCTGTTACATCC#.((.((((((((((((.(((((#)))))...)))))))))))).)).	2134	2158	1.0	-19.0	0	0.01213827	0.544	0.9053106166666666	0.96675761125	-6.825347112316308	19	24	12	3UTR	MIRT501172	1	1
hsa-let-7c-5p	NM_001317818	SLC10A7	TGAGGTAGTAGGTTGTATGGTT#AGCCATATAACTTAAGATGTCC#.((.((..((((((((((((((#))))))))))))))..)).)).	670	692	1.0	-19.8	0	0.03106904	0.735	0.49894444285714284	0.42921623750000004	-10.682668576368258	18	22	14	3UTR	MIRT501172	1	1
hsa-let-7c-5p	NM_001317920	BCL2L1	TGAGGTAGTAGGTTGTATGGTT#TATGGCCTCAGCTGCCTCAC#(((((((((((((((((.....#))))))))..))))))))).	1716	1736	1.0	-21.0	1	0.00189519	0.456	0.0	0.0	-3.937574446201665	17	20	9	3UTR	MIRT004491	1	1
hsa-let-7c-5p	NM_001319960	EDEM3	TGAGGTAGTAGGTTGTATGGTT#AGCCATCAGCCTTACTCCATCC#.((((.(((((((((.((((((#)))))))))))).))))).)).	3961	3983	1.0	-19.4	0	0.1254123	0.544	1.53042413	1.4927119162500002	-5.927332678853777	19	22	12	3UTR	MIRT704029	1	1
hsa-let-7c-5p	NM_001321017	UBA52	TGAGGTAGTAGGTTGTATGGTT#TACAACCTCTGCCTCC#.(((((((.((((((((.....#))))))))))))))).	1180	1196	1.0	-22.9	1	0.05646785	0.382	-0.15534874999999998	-0.3910035999999999	-4.849714495602881	15	16	15	3UTR	MIRT051853	0	0
hsa-let-7c-5p	NM_001322814	SOD2	TGAGGTAGTAGGTTGTATGGTT#AGCCCCAGTGAGATGAACCTGGTACCTCAG#(((((((.((((((........#.)))))).))))))).	12391	12421	1.0	-20.5	1	0.002413146	0.5	-0.10128857142857138	0.08866027500000002	-7.219708015936543	13	16	7	3UTR	MIRT525729	0	0
hsa-let-7c-5p	NM_001322815	SOD2	TGAGGTAGTAGGTTGTATGGTT#AGCCCCAGTGAGATGAACCTGGTACCTCAG#(((((((.((((((........#.)))))).))))))).	12328	12358	1.0	-20.5	1	0.002413146	0.5	-0.22341571428571433	0.049987174999999995	-7.219708015936543	13	16	7	3UTR	MIRT525729	0	0
hsa-let-7c-5p	NM_001330232	NAP1L1	TGAGGTAGTAGGTTGTATGGTT#ACTGTTTACCTAACTACCTCAT#(((((((((((((...(((((.#)))))..))))).)))))))).	1639	1661	1.0	-20.4	1	0.00421968	0.676	0.3939567	1.1134522124999997	-5.762913004276319	18	22	8	3UTR	MIRT712371	1	1
hsa-let-7c-5p	NM_000212	ITGB3	TGAGGTAGTAGGTTGTATGGTT#TCACTGCAATCTCTGCCTCT#.(((((((.(((((((((((..#))).))))))))))))))).	5243	5263	1.0	-21.6	1	0.01419097	0.471	-0.041944666666666665	-0.15599780000000002	-4.849714495602881	18	20	15	3UTR	MIRT054066	1	1
hsa-let-7c-5p	NM_000456	SUOX	TGAGGTAGTAGGTTGTATGGTT#AGCCACCTCCACCCCTTTCCCCACCCATTAGCCTCACTGCTTCAG#(((((((((((((((.((((..#.)))))))))).))))))))).	1958	2003	1.0	-23.2	1	0.04846667	0.515	0.0	0.0	-4.1706235265052785	19	22	10	3UTR	MIRT187715	0	0
hsa-let-7c-5p	NM_000456	SUOX	TGAGGTAGTAGGTTGTATGGTT#GCCTACTGCCATCAA#(((((((((((((.........#)))))))))).))).	2247	2262	1.0	-18.9	1	0.01373581	0.559	0.0	0.0	-5.762913004276319	13	15	10	3UTR	MIRT187715	0	0
hsa-let-7c-5p	NM_000611	CD59	TGAGGTAGTAGGTTGTATGGTT#ACCAGTCATGCCTACTGGCTCT#.(((.((((((((((..((((.#))))..)).)))))))).))).	2932	2954	1.0	-23.7	0	3.796083e-06	0.441	0.0	0.0	-8.145411092473203	17	22	8	3UTR	MIRT512746	0	1
hsa-let-7c-5p	NM_000636	SOD2	TGAGGTAGTAGGTTGTATGGTT#AGCCCCAGTGAGATGAACCTGGTACCTCAG#(((((((.((((((........#.)))))).))))))).	12508	12538	1.0	-20.5	1	0.002413146	0.5	0.0	0.0	-7.219708015936543	13	16	7	3UTR	MIRT525729	0	0
hsa-let-7c-5p	NM_001001924	MTUS1	TGAGGTAGTAGGTTGTATGGTT#ACCATCCAGAGCCACAAAAGCAAACCTTCTACCTCC#.(((((((.(((((((.(((((#.))))).....)))).))).))))))).	5282	5318	1.0	-20.8	1	0.302939	0.544	0.0	0.0	-4.849714495602881	19	28	7	3UTR	MIRT472736	1	1
hsa-let-7c-5p	NM_001001924	MTUS1	TGAGGTAGTAGGTTGTATGGTT#CCAAAACTTATTACCTCC#.(((((((((((((...(((..#))).))))))))))))).	5697	5715	1.0	-19.4	1	0.1149331	0.603	0.0	0.0	-4.761823477911366	16	18	13	3UTR	MIRT472736	1	1
hsa-let-7c-5p	NM_001001925	MTUS1	TGAGGTAGTAGGTTGTATGGTT#ACCATCCAGAGCCACAAAAGCAAACCTTCTACCTCC#.(((((((.(((((((.(((((#.))))).....)))).))).))))))).	5120	5156	1.0	-20.8	1	0.302939	0.544	0.0	0.0	-4.849714495602881	19	28	7	3UTR	MIRT472736	1	1
hsa-let-7c-5p	NM_001001925	MTUS1	TGAGGTAGTAGGTTGTATGGTT#CCAAAACTTATTACCTCC#.(((((((((((((...(((..#))).))))))))))))).	5535	5553	1.0	-19.4	1	0.1149331	0.603	0.0	0.0	-4.761823477911366	16	18	13	3UTR	MIRT472736	1	1
hsa-let-7c-5p	NM_001001931	MTUS1	TGAGGTAGTAGGTTGTATGGTT#GCAAACCTTCTACCTCC#.(((((((.(((((((......#)))).))).))))))).	2656	2673	1.0	-18.4	1	0.302939	0.544	0.0	0.0	-4.849714495602881	14	17	7	3UTR	MIRT472736	1	1
hsa-let-7c-5p	NM_001001931	MTUS1	TGAGGTAGTAGGTTGTATGGTT#CCAAAACTTATTACCTCC#.(((((((((((((...(((..#))).))))))))))))).	3052	3070	1.0	-19.4	1	0.1149331	0.603	0.0	0.0	-4.761823477911366	16	18	13	3UTR	MIRT472736	1	1
hsa-let-7c-5p	NM_001004023	DYRK3	TGAGGTAGTAGGTTGTATGGTT#ATACTCCTACTACTTTG#.(((((((((((..((((....#)))).))))))))))).	7175	7192	1.0	-18.1	1	0.04643035	0.618	0.0	0.0	-5.9392953675437665	15	17	11	3UTR	MIRT735619	0	0
hsa-let-7c-5p	NM_001005353	AK4	TGAGGTAGTAGGTTGTATGGTT#GATGATGAAATTTATTCCTGCTGCCTTAA#((((((((((((..(((.....#.))).)))))))))))).	2385	2414	1.0	-19.2	1	0.1383982	0.618	0.0	0.0	-6.083544976388314	15	18	12	3UTR	MIRT508934	0	0
hsa-let-7c-5p	NM_001008564	NUP58	TGAGGTAGTAGGTTGTATGGTT#GGCCTACAACTTTTGCCTCAG#((((((((.((((((((.((((#)))))))))))))))))))).	2733	2754	1.0	-23.2	1	0.0277513	0.647	0.0	0.0	-4.993964104447428	20	21	20	3UTR	MIRT051820	0	0
hsa-let-7c-5p	NM_001008749	RAB19	TGAGGTAGTAGGTTGTATGGTT#AGCTGGAGTATAGTGGTGGGATCTTGGCTCACTGCAACCTCTACCTCC#.(((((((.(((((((((((((#.))).)).))))))))))))))).	1572	1620	1.0	-24.4	1	0.01604808	0.456	0.0	0.0	-4.849714495602881	20	24	15	3UTR	MIRT681740	0	0
hsa-let-7c-5p	NM_001010853	PM20D2	TGAGGTAGTAGGTTGTATGGTT#GGCTCACTGCAACCTCTGCCTCC#.(((((((.(((((((((((((#))).)).))))))))))))))).	1973	1996	1.0	-24.2	1	0.001558105	0.426	0.0	0.0	-4.849714495602881	20	23	15	3UTR	MIRT545389	0	0
hsa-let-7c-5p	NM_001010891	MTX3	TGAGGTAGTAGGTTGTATGGTT#GGCTGGAGTGCAGTAGCGCAGTCTCGGCTCACTGCAACCTCTACCTCC#.(((((((.(((((((((((((#.))).)).))))))))))))))).	3411	3459	1.0	-24.5	1	0.00175282	0.412	0.0	0.0	-4.849714495602881	20	24	15	3UTR	MIRT682446	0	0
hsa-let-7c-5p	NM_001010989	HERPUD1	TGAGGTAGTAGGTTGTATGGTT#GCCGTGGCGCGATCTCGGCTCACTGCAACCTCTACCTCC#.(((((((.(((((((((((((#.))).)).))))))))))))))).	2504	2543	1.0	-24.5	1	0.03432611	0.382	0.0	0.0	-4.849714495602881	20	24	15	3UTR	MIRT475735	0	0
hsa-let-7c-5p	NM_001012957	DISC1	TGAGGTAGTAGGTTGTATGGTT#GGCCCCGCAATCTCGGCTCACTGCAACCTCTACCTCC#.(((((((.(((((((((((((#.))).)).))))))))))))))).	5792	5829	1.0	-24.5	1	0.001094966	0.412	0.0	0.0	-4.849714495602881	20	24	15	3UTR	MIRT452945	0	0
hsa-let-7c-5p	NM_001012957	DISC1	TGAGGTAGTAGGTTGTATGGTT#AGCCATGGAACTTACTTGTTCACCTGGC#(.((((((((((((.(((((((#))))))).)))))))).....)))).).	6399	6427	1.0	-21.4	1	8.855879e-06	0.574	0.0	0.0	-5.8366998884674715	20	28	8	3UTR	MIRT452945	0	0
hsa-let-7c-5p	NM_001032386	SUOX	TGAGGTAGTAGGTTGTATGGTT#AGCCACCTCCACCCCTTTCCCCACCCATTAGCCTCACTGCTTCAG#(((((((((((((((.((((..#.)))))))))).))))))))).	1832	1877	1.0	-23.2	1	0.04846667	0.515	0.0	0.0	-4.1706235265052785	19	22	10	3UTR	MIRT187715	0	0
hsa-let-7c-5p	NM_001032386	SUOX	TGAGGTAGTAGGTTGTATGGTT#GCCTACTGCCATCAA#(((((((((((((.........#)))))))))).))).	2121	2136	1.0	-18.9	1	0.01373581	0.559	0.0	0.0	-5.762913004276319	13	15	10	3UTR	MIRT187715	0	0
hsa-let-7c-5p	NM_001032387	SUOX	TGAGGTAGTAGGTTGTATGGTT#AGCCACCTCCACCCCTTTCCCCACCCATTAGCCTCACTGCTTCAG#(((((((((((((((.((((..#.)))))))))).))))))))).	1723	1768	1.0	-23.2	1	0.04846667	0.515	0.0	0.0	-4.1706235265052785	19	22	10	3UTR	MIRT187715	0	0
hsa-let-7c-5p	NM_001032387	SUOX	TGAGGTAGTAGGTTGTATGGTT#GCCTACTGCCATCAA#(((((((((((((.........#)))))))))).))).	2012	2027	1.0	-18.9	1	0.01373581	0.559	0.0	0.0	-5.762913004276319	13	15	10	3UTR	MIRT187715	0	0
hsa-let-7c-5p	NM_001033583	ACOT9	TGAGGTAGTAGGTTGTATGGTT#AGCTGGAGTGCAGTGGCATGATCTTGGCTCACTGCAACCTCTACCTCC#.(((((((.(((((((((((((#.))).)).))))))))))))))).	3299	3347	1.0	-24.4	1	0.00227228	0.412	0.0	0.0	-4.849714495602881	20	24	15	3UTR	MIRT454856	0	0
hsa-let-7c-5p	NM_001033930	UBA52	TGAGGTAGTAGGTTGTATGGTT#TACAACCTCTGCCTCC#.(((((((.((((((((.....#))))))))))))))).	1120	1136	1.0	-22.9	1	0.05646785	0.382	0.0	0.0	-4.849714495602881	15	16	15	3UTR	MIRT051853	0	0
hsa-let-7c-5p	NM_001033930	UBA52	TGAGGTAGTAGGTTGTATGGTT#GGCTCACTGCAGCTTCTGCCTCT#.(((((((.(((((((((((((#))).)).))))))))))))))).	2028	2051	1.0	-21.9	1	0.0003351819	0.382	0.0	0.0	-4.849714495602881	20	23	15	3UTR	MIRT051853	0	0
hsa-let-7c-5p	NM_001034	RRM2	TGAGGTAGTAGGTTGTATGGTT#ATGCAGCCTCACTGCTTCAA#((((((((((((((((((....#))))))))).))))))))).	1552	1572	1.0	-24.1	1	0.001472693	0.632	0.0	0.0	-3.937574446201665	18	20	9	3UTR	MIRT297011	1	1
hsa-let-7c-5p	NM_001037171	ACOT9	TGAGGTAGTAGGTTGTATGGTT#AGCTGGAGTGCAGTGGCATGATCTTGGCTCACTGCAACCTCTACCTCC#.(((((((.(((((((((((((#.))).)).))))))))))))))).	3326	3374	1.0	-24.4	1	0.00227228	0.412	0.0	0.0	-4.849714495602881	20	24	15	3UTR	MIRT454856	0	0
hsa-let-7c-5p	NM_001039479	AREL1	TGAGGTAGTAGGTTGTATGGTT#GGCCATGGCACTGGACTGCCTCT#.((((((((.(((..(((((((#)))))))..)))..)))))))).	3500	3523	1.0	-22.6	1	0.0008026234	0.574	0.0	0.0	-6.628120783456338	18	23	8	3UTR	MIRT481654	0	0
hsa-let-7c-5p	NM_001039999	FAM83G	TGAGGTAGTAGGTTGTATGGTT#AGCCTTTTCCAAGTGGGACATGGAAGAGGCAGCCTGCTGCCTGGA#(.((((((((((((((......#.)))))))))))))).).	3801	3846	1.0	-25.1	1	1.006406e-05	0.412	0.0	0.0	-5.101250328216836	15	18	14	3UTR	MIRT476976	1	0
hsa-let-7d-3p	XM_047426290	CELF1	CTATACGACCTGCTGCCTTTCT#AGAGACACGAGAAGCAGAGGTAGAGCCTAGAAGGTGGCAGCAGGTGGG#.....(.(((((((((((((((#.)))))..)))))))))).).	2741	2789	1.0	-25.3	0	0.001478218	0.485	0.0	0.0	-15.20928617832172	16	21	10	3UTR	MIRT735642	0	0
hsa-let-7d-3p	XM_047426292	CELF1	CTATACGACCTGCTGCCTTTCT#AGAGACACGAGAAGCAGAGGTAGAGCCTAGAAGGTGGCAGCAGGTGGG#.....(.(((((((((((((((#.)))))..)))))))))).).	2732	2780	1.0	-25.3	0	0.001478218	0.485	0.0	0.0	-15.20928617832172	16	21	10	3UTR	MIRT735642	0	0
hsa-let-7d-3p	NM_198700	CELF1	CTATACGACCTGCTGCCTTTCT#AGAGACACGAGAAGCAGAGGTAGAGCCTAGAAGGTGGCAGCAGGTGGG#.....(.(((((((((((((((#.)))))..)))))))))).).	2875	2923	1.0	-25.3	0	0.001478218	0.485	0.0	0.0	-15.20928617832172	16	21	10	3UTR	MIRT735642	0	0
hsa-let-7d-3p	NM_001376372	CELF1	CTATACGACCTGCTGCCTTTCT#AGAGACACGAGAAGCAGAGGTAGAGCCTAGAAGGTGGCAGCAGGTGGG#.....(.(((((((((((((((#.)))))..)))))))))).).	6312	6360	1.0	-25.3	0	0.001478218	0.485	0.0	0.0	-15.20928617832172	16	21	10	3UTR	MIRT735642	0	0
hsa-let-7d-3p	NM_001376376	CELF1	CTATACGACCTGCTGCCTTTCT#AGAGACACGAGAAGCAGAGGTAGAGCCTAGAAGGTGGCAGCAGGTGGG#.....(.(((((((((((((((#.)))))..)))))))))).).	6360	6408	1.0	-25.3	0	0.001478218	0.485	0.0	0.0	-15.20928617832172	16	21	10	3UTR	MIRT735642	0	0
hsa-let-7d-3p	NM_001172639	CELF1	CTATACGACCTGCTGCCTTTCT#AGAGACACGAGAAGCAGAGGTAGAGCCTAGAAGGTGGCAGCAGGTGGG#.....(.(((((((((((((((#.)))))..)))))))))).).	5496	5544	1.0	-25.3	0	0.001478218	0.485	4.761295352941177	3.830494315000001	-15.20928617832172	16	21	10	3UTR	MIRT735642	0	0
hsa-let-7d-3p	NM_001172640	CELF1	CTATACGACCTGCTGCCTTTCT#AGAGACACGAGAAGCAGAGGTAGAGCCTAGAAGGTGGCAGCAGGTGGG#.....(.(((((((((((((((#.)))))..)))))))))).).	6042	6090	1.0	-25.3	0	0.001478218	0.485	2.6412224705882354	3.634440274999999	-15.20928617832172	16	21	10	3UTR	MIRT735642	0	0
hsa-let-7d-5p	XM_024447187	PPP2R2A	AGAGGTAGTAGGTTGCATAGTT#CAACAGCTGCCTCA#.((((((((..((((.......#)))).)))))))).	2820	2834	0.9615384615384616	-17.0	1	0.1708463	0.676	0.0	0.0	-8.09365486139926	12	14	8	3UTR	MIRT322427	1	1
hsa-let-7d-5p	XM_047438178	C19orf47	AGAGGTAGTAGGTTGCATAGTT#CTGAGCAGGGTCTGCTGCCTCA#.(((((((((((((((.(((..#))).))))..))))))))))).	1649	1671	0.9615384615384616	-23.3	1	4.760824e-08	0.368	0.0	0.0	-3.793324837357118	18	22	11	3UTR	MIRT559088	1	1
hsa-let-7d-5p	NM_183231	IKZF3	AGAGGTAGTAGGTTGCATAGTT#GGCTCACGGCAACCTCCGCCTCC#.(((((.(.(((((((..((((#))))....)))))))).))))).	4385	4408	0.9615384615384616	-20.1	0	0.0004136562	0.338	-0.8329562857142857	0.26949299000000004	-6.3934010304742	17	23	8	3UTR	MIRT511387	0	0
hsa-let-7d-5p	NM_201414	APP	AGAGGTAGTAGGTTGCATAGTT#ACTGTACAGATTGCTGCTTCTG#(((((((((((.(((.(((((.#))))).))).))))))))))).	2770	2792	0.9615384615384616	-18.9	1	0.001073353	0.647	2.4959551636363635	4.253160186250001	-7.517426836101634	19	22	11	3UTR	MIRT003901	0	0
hsa-let-7d-5p	NM_001204301	APP	AGAGGTAGTAGGTTGCATAGTT#ACTGTACAGATTGCTGCTTCTG#(((((((((((.(((.(((((.#))))).))).))))))))))).	2941	2963	0.9615384615384616	-18.9	1	0.001073353	0.647	3.889424990909091	5.620759997500001	-7.517426836101634	19	22	11	3UTR	MIRT003901	0	0
hsa-let-7d-5p	NM_001256441	C19orf47	AGAGGTAGTAGGTTGCATAGTT#CTGAGCAGGGTCTGCTGCCTCA#.(((((((((((((((.(((..#))).))))..))))))))))).	1592	1614	0.9615384615384616	-23.3	1	4.760824e-08	0.368	-0.0061134117647058854	0.340285655	-3.793324837357118	18	22	11	3UTR	MIRT559088	1	1
hsa-let-7d-5p	NM_001257409	IKZF3	AGAGGTAGTAGGTTGCATAGTT#GGCTCACGGCAACCTCCGCCTCC#.(((((.(.(((((((..((((#))))....)))))))).))))).	4451	4474	0.9615384615384616	-20.1	0	0.0004136562	0.338	-0.26627671428571426	0.04711414000000004	-6.3934010304742	17	23	8	3UTR	MIRT511387	0	0
hsa-let-7d-5p	NM_001257413	IKZF3	AGAGGTAGTAGGTTGCATAGTT#GGCTCACGGCAACCTCCGCCTCC#.(((((.(.(((((((..((((#))))....)))))))).))))).	4007	4030	0.9615384615384616	-20.1	0	0.0004136562	0.338	-0.11172785714285714	0.0726575175	-6.3934010304742	17	23	8	3UTR	MIRT511387	0	0
hsa-let-7d-5p	NM_001257414	IKZF3	AGAGGTAGTAGGTTGCATAGTT#GGCTCACGGCAACCTCCGCCTCC#.(((((.(.(((((((..((((#))))....)))))))).))))).	4268	4291	0.9615384615384616	-20.1	0	0.0004136562	0.338	-0.44658414285714293	0.0794191125	-6.3934010304742	17	23	8	3UTR	MIRT511387	0	0
hsa-let-7d-5p	NM_001280789	SURF4	AGAGGTAGTAGGTTGCATAGTT#CTGGTAGCCTACTTCCTTA#.((((.((((((((((.(((..#))))))))))))).)))).	2003	2022	0.9615384615384616	-21.5	0	0.006473779	0.529	0.0	0.0	-5.694283598550164	17	19	13	3UTR	MIRT565450	1	1
hsa-let-7d-5p	NM_001280790	SURF4	AGAGGTAGTAGGTTGCATAGTT#CTGGTAGCCTACTTCCTTA#.((((.((((((((((.(((..#))))))))))))).)))).	2512	2531	0.9615384615384616	-21.5	0	0.006473779	0.529	0.0	0.0	-5.694283598550164	17	19	13	3UTR	MIRT565450	1	1
hsa-let-7d-5p	NM_001166393	MTUS1	AGAGGTAGTAGGTTGCATAGTT#ACAAAAGCAAACCTTCTACCTCC#.(((((((.(((((((......#.)))).))).))))))).	2527	2550	0.9615384615384616	-20.8	1	0.302939	0.544	4.15487245	3.6486679312499994	-4.849714495602881	14	18	7	3UTR	MIRT472738	1	1
hsa-let-7d-5p	NM_005224	ARID3A	AGAGGTAGTAGGTTGCATAGTT#TGCAACCTGCACCTCC#.(((((.((((((((((.....#))))))))))))))).	3197	3213	0.9615384615384616	-24.9	0	1.870999e-05	0.397	-0.39242600000000005	-0.30727023124999997	-5.337011372228436	15	16	15	3UTR	MIRT032173	1	1
hsa-let-7d-5p	NM_002717	PPP2R2A	AGAGGTAGTAGGTTGCATAGTT#CAACAGCTGCCTCA#.((((((((..((((.......#)))).)))))))).	2996	3010	0.9615384615384616	-17.0	1	0.1708463	0.676	-0.014897499999999987	0.2712755324999999	-8.09365486139926	12	14	8	3UTR	MIRT322427	1	1
hsa-let-7d-5p	NM_001136016	APP	AGAGGTAGTAGGTTGCATAGTT#ACTGTACAGATTGCTGCTTCTG#(((((((((((.(((.(((((.#))))).))).))))))))))).	2969	2991	0.9615384615384616	-18.9	1	0.001073353	0.647	6.306960000000001	5.160689592500001	-7.517426836101634	19	22	11	3UTR	MIRT003901	0	0
hsa-let-7d-5p	NM_001136129	APP	AGAGGTAGTAGGTTGCATAGTT#ACTGTACAGATTGCTGCTTCTG#(((((((((((.(((.(((((.#))))).))).))))))))))).	2602	2624	0.9615384615384616	-18.9	1	0.001073353	0.647	2.4959551636363635	4.253160186250001	-7.517426836101634	19	22	11	3UTR	MIRT003901	0	0
hsa-let-7d-5p	NM_001136130	APP	AGAGGTAGTAGGTTGCATAGTT#ACTGTACAGATTGCTGCTTCTG#(((((((((((.(((.(((((.#))))).))).))))))))))).	2827	2849	0.9615384615384616	-18.9	1	0.001073353	0.647	2.4959551636363635	4.253160186250001	-7.517426836101634	19	22	11	3UTR	MIRT003901	0	0
hsa-let-7d-5p	NM_001136131	APP	AGAGGTAGTAGGTTGCATAGTT#ACTGTACAGATTGCTGCTTCTG#(((((((((((.(((.(((((.#))))).))).))))))))))).	2707	2729	0.9615384615384616	-18.9	1	0.001073353	0.647	3.024229345454545	5.786565935000001	-7.517426836101634	19	22	11	3UTR	MIRT003901	0	0
hsa-let-7d-5p	NM_145690	YWHAZ	AGAGGTAGTAGGTTGCATAGTT#TGCAACCTTCTCCTCC#.((((.((.((((((((.....#)))))))).)))))).	3873	3889	0.9615384615384616	-20.4	0	0.01421907	0.397	2.46213	3.2325873675	-6.750673256795928	14	16	8	3UTR	MIRT463663	0	0
hsa-let-7d-5p	NM_001330470	MTUS1	AGAGGTAGTAGGTTGCATAGTT#ATGCAGCCTCCTCTG#(((((....(((((((((....#)))))))))))))).	1643	1658	1.0	-19.3	0	0.0001049797	0.603	0.9783232222222225	0.5403408975	-10.752244329692425	14	15	14	3UTR	MIRT472738	1	1
hsa-let-7d-5p	NM_001330470	MTUS1	AGAGGTAGTAGGTTGCATAGTT#TTGTGTTGTTCCCTGCTGTCCTCC#.(((((((((((..((((((..#)))))).....))))))).)))).	3038	3062	1.0	-19.1	1	0.0601276	0.559	2.387150833333333	2.8902478	-5.9392953675437665	17	24	7	3UTR	MIRT472738	1	1
hsa-let-7d-5p	NM_001330476	SLC30A6	AGAGGTAGTAGGTTGCATAGTT#TGCAACCTCTGCCTCC#.(((((((.((((((((.....#))))))))))))))).	1730	1746	1.0	-25.1	1	0.005225428	0.456	0.032934	0.025856172499999927	-4.849714495602881	15	16	15	3UTR	MIRT032161	1	0
hsa-let-7d-5p	NM_001344	DAD1	AGAGGTAGTAGGTTGCATAGTT#ATGTAACCTTTTGCCTTC#.(((((((.(((((((((....#))))))))).))))))).	638	656	1.0	-20.7	1	0.008631198	0.567	-0.46259758888888886	1.264362967678571	-4.849714495602881	16	18	9	3UTR	MIRT032104	0	0
hsa-let-7d-5p	NM_001344	DAD1	AGAGGTAGTAGGTTGCATAGTT#ATTAATCCAGCCTCTGCCTTTC#((((((((.((((((.......#.)))))))))))))).	611	633	1.0	-18.3	1	0.1140587	0.676	0.7692208749999999	1.6526021500000005	-5.227013184751041	14	16	14	3UTR	MIRT032104	0	0
hsa-let-7d-5p	NM_001354412	RABL2A	AGAGGTAGTAGGTTGCATAGTT#GGCTGGAGTGCAGTGGCGCAGTCTCGGCTCGCTGCAACCTCTGACTCCCTGGTTCAAACGATTCTCCTGCCTCA#.(((((((.((((((((.((((#.))))...))))))))..........................))))))).	1437	1511	1.0	-20.8	1	0.03638202	0.397	0.0	0.0	-4.849714495602881	19	50	8	3UTR	MIRT454540	0	0
hsa-let-7d-5p	NM_001355241	ZNF738	AGAGGTAGTAGGTTGCATAGTT#GGCTCATCGTAACCTCTGCCTCC#.(((((((.(((((((......#.)))))))))))))).	920	943	1.0	-22.4	1	0.08694241	0.426	-0.18479868571428573	0.0729184375	-4.849714495602881	14	16	14	3UTR	MIRT681537	0	0
hsa-let-7d-5p	NM_001362952	NCOA1	AGAGGTAGTAGGTTGCATAGTT#GCTACCTCTGCCTCC#.(((((((.((((.((......#)).))))))))))).	6602	6617	1.0	-20.4	1	0.005465146	0.471	0.0	0.0	-5.706554413123287	13	15	11	3UTR	MIRT051725	1	0
hsa-let-7d-5p	NM_001362954	NCOA1	AGAGGTAGTAGGTTGCATAGTT#GCTACCTCTGCCTCC#.(((((((.((((.((......#)).))))))))))).	6599	6614	1.0	-20.4	1	0.005465146	0.471	0.0	0.0	-5.706554413123287	13	15	11	3UTR	MIRT051725	1	0
hsa-let-7d-5p	NM_001363059	MTUS1	AGAGGTAGTAGGTTGCATAGTT#GCAAACCTTCTACCTCC#.(((((((.(((((((......#)))).))).))))))).	5015	5032	1.0	-21.0	1	0.302939	0.544	0.0	0.0	-4.849714495602881	14	17	7	3UTR	MIRT472738	1	1
hsa-let-7d-5p	NM_001363062	MTUS1	AGAGGTAGTAGGTTGCATAGTT#GCAAACCTTCTACCTCC#.(((((((.(((((((......#)))).))).))))))).	4853	4870	1.0	-21.0	1	0.302939	0.544	0.0	0.0	-4.849714495602881	14	17	7	3UTR	MIRT472738	1	1
hsa-let-7d-5p	NM_001363062	MTUS1	AGAGGTAGTAGGTTGCATAGTT#ATGCAGCCTCCTCTG#(((((....(((((((((....#)))))))))))))).	4290	4305	1.0	-19.3	0	0.0001049797	0.603	0.0	0.0	-10.752244329692425	14	15	14	3UTR	MIRT472738	1	1
hsa-let-7d-5p	NM_001363748	EPHA4	AGAGGTAGTAGGTTGCATAGTT#TGTGCATTCTGAGACCTCTT#((((((..((((.((((((...#)))))).))))..)))))).	5851	5871	1.0	-19.6	0	0.008103012	0.559	0.0	0.0	-9.08402652291986	16	20	6	3UTR	MIRT548346	1	1
hsa-let-7d-5p	NM_001363818	MTX3	AGAGGTAGTAGGTTGCATAGTT#TGCAACCTCTACCTCC#.(((((((.((((((((.....#))))))))))))))).	3532	3548	1.0	-25.1	1	0.00175282	0.412	0.0	0.0	-4.849714495602881	15	16	15	3UTR	MIRT682445	0	0
hsa-let-7d-5p	XM_017018142	TMEM135	AGAGGTAGTAGGTTGCATAGTT#TTGTGCCATACTCTCCCCCACCCCCAGCCTGCTGCCTCTG#(((((((((((((((.......#.))))))))))))))).	5781	5821	1.0	-26.4	1	0.00251036	0.456	0.0	0.0	-4.1706235265052785	15	17	15	3UTR	MIRT032182	1	0
hsa-let-7d-5p	XM_017019062	ERC1	AGAGGTAGTAGGTTGCATAGTT#GTGCACCCGCTGCCTTC#.((((((((.((.(((((....#))))))).)))))))).	9295	9312	1.0	-20.6	1	1.585731e-06	0.426	0.0	0.0	-6.32496191835154	15	17	8	3UTR	MIRT032135	0	0
hsa-let-7d-5p	XM_017019064	ERC1	AGAGGTAGTAGGTTGCATAGTT#GTGCACCCGCTGCCTTC#.((((((((.((.(((((....#))))))).)))))))).	9283	9300	1.0	-20.6	1	1.585731e-06	0.426	0.0	0.0	-6.32496191835154	15	17	8	3UTR	MIRT032135	0	0
hsa-let-7d-5p	XM_017019066	ERC1	AGAGGTAGTAGGTTGCATAGTT#GTGCACCCGCTGCCTTC#.((((((((.((.(((((....#))))))).)))))))).	9211	9228	1.0	-20.6	1	1.585731e-06	0.426	0.0	0.0	-6.32496191835154	15	17	8	3UTR	MIRT032135	0	0
hsa-let-7d-5p	XM_017024551	SOCS7	AGAGGTAGTAGGTTGCATAGTT#CCTGCTGCCTCG#.(((((((((((..........#))))))))))).	6058	6070	1.0	-20.2	1	0.08510256	0.515	0.0	0.0	-6.907794008098015	11	12	11	3UTR	MIRT735663	0	1
hsa-let-7d-5p	XM_017024551	SOCS7	AGAGGTAGTAGGTTGCATAGTT#GCATCCCTATTGCTTCTG#((((((((((((.(((......#)))..)))))))))))).	2877	2895	1.0	-20.5	1	0.01346536	0.515	0.0	0.0	-5.226705058867908	15	18	12	3UTR	MIRT735663	0	1
hsa-let-7d-5p	XM_024448983	NAP1L1	AGAGGTAGTAGGTTGCATAGTT#AATTGAACAGCCTATGTCCTCA#.((((..((((((((.......#.))))))))..)))).	11112	11134	1.0	-19.8	0	0.002123114	0.603	0.0	0.0	-7.4710192137250955	12	16	8	3UTR	MIRT712372	1	1
hsa-let-7d-5p	XM_047415907	TBC1D19	AGAGGTAGTAGGTTGCATAGTT#GGCCTGCCTGCCTCTG#((((((((((((((........#))))))).))))))).	5930	5946	1.0	-19.9	1	2.393294e-07	0.368	0.0	0.0	-4.906073086755913	14	16	7	3UTR	MIRT495969	0	0
hsa-let-7d-5p	XM_047420438	CPA4	AGAGGTAGTAGGTTGCATAGTT#GAGTGTGATGGCTCGATCTTGGCTCACCACAACCTCTGCCTCC#.(((((((.((((((.......#.))))))))))))).	2001	2044	1.0	-20.6	1	0.0491033	0.426	0.0	0.0	-5.082763575906494	13	15	13	3UTR	MIRT682605	1	1
hsa-let-7d-5p	XM_047420438	CPA4	AGAGGTAGTAGGTTGCATAGTT#CAACCAGCTGCCTCTT#(((((((((.(((((.......#))))).))))))))).	2735	2751	1.0	-20.2	1	0.03620541	0.559	0.0	0.0	-5.413129994833456	14	16	9	3UTR	MIRT682605	1	1
hsa-let-7d-5p	XM_047423214	FBXW2	AGAGGTAGTAGGTTGCATAGTT#TGCAACCTCCGCCTCC#.(((((.(.((((((((.....#))))))))).))))).	3742	3758	1.0	-20.8	0	0.0003398462	0.412	0.0	0.0	-6.3934010304742	14	16	9	3UTR	MIRT523734	0	0
hsa-let-7d-5p	XM_047425088	POLL	AGAGGTAGTAGGTTGCATAGTT#TGCCACCCCTTCTACCTCA#.(((((((..(((.(((.....#))).)))....))))))).	1902	1921	1.0	-18.1	1	0.6358596	0.441	0.0	0.0	-6.949060881451466	13	19	7	3UTR	MIRT735659	0	1
hsa-let-7d-5p	XM_047427391	RDX	AGAGGTAGTAGGTTGCATAGTT#GAGGGGACAACAATACTACCTCA#.(((((((((.((((.......#.))))..))))))))).	2040	2063	1.0	-18.7	1	0.002849269	0.544	0.0	0.0	-6.851148393071081	13	17	9	3UTR	MIRT521390	1	1
hsa-let-7d-5p	XM_047428567	ERC1	AGAGGTAGTAGGTTGCATAGTT#GTGCACCCGCTGCCTTC#.((((((((.((.(((((....#))))))).)))))))).	9088	9105	1.0	-20.6	1	1.585731e-06	0.426	0.0	0.0	-6.32496191835154	15	17	8	3UTR	MIRT032135	0	0
hsa-let-7d-5p	XM_047429469	STAT2	AGAGGTAGTAGGTTGCATAGTT#TGCAGCCTCAACCTCC#.(((((.(.((((((((.....#))))))))).))))).	2565	2581	1.0	-20.5	0	0.0008882302	0.441	0.0	0.0	-6.3934010304742	14	16	9	3UTR	MIRT681507	0	0
hsa-let-7d-5p	XM_047431995	PRORP	AGAGGTAGTAGGTTGCATAGTT#GGCTCAAGCAATCTTCCTACCTCA#.(((((((.(((((((......#.)))))))..))))))).	2928	2952	1.0	-21.5	1	0.03934499	0.471	0.0	0.0	-4.849714495602881	14	18	7	3UTR	MIRT549800	1	0
hsa-let-7d-5p	XM_047432115	DYRK3	AGAGGTAGTAGGTTGCATAGTT#GGCTGGAGTGAAGTGGCGCAGTGTTGTCTGCAGCCTCAACCTCC#.(((((.(.((((((((.....#.))))))))).))))).	6134	6178	1.0	-20.7	0	8.523877e-05	0.426	0.0	0.0	-6.3934010304742	14	17	9	3UTR	MIRT735646	0	0
hsa-let-7d-5p	XM_047441143	ZNF280B	AGAGGTAGTAGGTTGCATAGTT#ATGCCCTTCCCCTAGGCCTGCATGGCTTGCTACCTCA#.((((((((((((((((.....#.))))..)))))))))))).	4683	4720	1.0	-23.6	1	0.01079901	0.515	0.0	0.0	-3.793324837357118	16	20	12	3UTR	MIRT032184	0	1
hsa-let-7d-5p	XM_047441143	ZNF280B	AGAGGTAGTAGGTTGCATAGTT#GGAGCCTCCTGCCTCA#.(((((((.(((((.(......#).))))).))))))).	2449	2465	1.0	-21.2	1	4.878407e-06	0.382	0.0	0.0	-5.585164055853516	13	16	7	3UTR	MIRT032184	0	1
hsa-let-7d-5p	XM_047445927	SLC19A3	AGAGGTAGTAGGTTGCATAGTT#TGCAACCTCCGCCTCC#.(((((.(.((((((((.....#))))))))).))))).	4480	4496	1.0	-20.8	0	0.0008064102	0.412	0.0	0.0	-6.3934010304742	14	16	9	3UTR	MIRT681942	0	0
hsa-let-7d-5p	XM_047445927	SLC19A3	AGAGGTAGTAGGTTGCATAGTT#GACTTCAGGTGATCTGTCTGCCTCG#.(((((((((((((((..((((#))))....)))))))).))))))).	3418	3443	1.0	-21.5	1	0.002253865	0.456	0.0	0.0	-3.793324837357118	19	25	8	3UTR	MIRT681942	0	0
hsa-let-7d-5p	XM_047447472	CTPS1	AGAGGTAGTAGGTTGCATAGTT#GGCTGGAGTGCAGTGGCATGATCCCAGTTCACTGCAACCTCTGCCTTC#.(((((((.((((((((.....#.))))))))))))))).	1609	1657	1.0	-23.4	1	0.0005037141	0.426	0.0	0.0	-4.849714495602881	15	17	15	3UTR	MIRT704422	1	0
hsa-let-7d-5p	XM_047449174	AK4	AGAGGTAGTAGGTTGCATAGTT#ATGCCAACCTGACCTCG#.(((((..((((((((((....#)))).))))))))))).	3255	3272	1.0	-18.1	0	0.002584709	0.559	0.0	0.0	-7.650646301409068	15	17	11	3UTR	MIRT508933	0	0
hsa-let-7d-5p	NM_152699	SENP5	AGAGGTAGTAGGTTGCATAGTT#CTCTGCTTTGCAGTTTACTGCTTCC#.((((((((((((((((.(((.#.))).)))))))))))))))).	5838	5863	1.0	-22.2	1	0.0002663046	0.456	0.35816795	0.6666560087500002	-3.793324837357118	19	22	16	3UTR	MIRT051719	1	1
hsa-let-7d-5p	NM_152699	SENP5	AGAGGTAGTAGGTTGCATAGTT#TGCAACCCCTGCCTCC#.(((((((..(((((((.....#))))))).))))))).	5206	5222	1.0	-21.9	1	0.002463114	0.426	-0.15506857142857142	-0.05412118749999999	-6.09222096393106	14	16	7	3UTR	MIRT051719	1	1
hsa-let-7d-5p	NM_153223	CEP120	AGAGGTAGTAGGTTGCATAGTT#AGCTGTCAGCTTAAACCCTCTG#(((((...(((((((.((((((#)))))))))))))...))))).	4077	4099	1.0	-19.0	0	0.01633824	0.632	2.9928274285714287	3.11282313125	-9.928903751750276	18	22	13	3UTR	MIRT032139	0	1
hsa-let-7d-5p	NM_153485	NUP155	AGAGGTAGTAGGTTGCATAGTT#TGCAACCTCTGCCTCA#.(((((((.((((((((.....#))))))))))))))).	5785	5801	1.0	-25.6	1	0.002457378	0.412	3.3390393750000005	3.4219908312499996	-4.849714495602881	15	16	15	3UTR	MIRT506360	1	0
hsa-let-7d-5p	NM_170743	IFNLR1	AGAGGTAGTAGGTTGCATAGTT#GCACACCTGCTATACCTCA#.(((((((((((((((......#))).)))))))..))))).	2003	2022	1.0	-21.1	1	0.4181024	0.426	0.42306377500000014	-0.13274761812499997	-3.793324837357118	15	19	7	3UTR	MIRT475332	0	1
hsa-let-7d-5p	NM_173064	IFNLR1	AGAGGTAGTAGGTTGCATAGTT#GCACACCTGCTATACCTCA#.(((((((((((((((......#))).)))))))..))))).	1916	1935	1.0	-21.1	1	0.4181024	0.426	1.4304176866666667	1.4723404884999998	-3.793324837357118	15	19	7	3UTR	MIRT475332	0	1
hsa-let-7d-5p	NM_173065	IFNLR1	AGAGGTAGTAGGTTGCATAGTT#GCACACCTGCTATACCTCA#.(((((((((((((((......#))).)))))))..))))).	1872	1891	1.0	-21.1	1	0.4181024	0.426	-0.55686795	-0.20159098249999996	-3.793324837357118	15	19	7	3UTR	MIRT475332	0	1
hsa-let-7d-5p	NM_173582	PGM2L1	AGAGGTAGTAGGTTGCATAGTT#GACTATTGCCCTGTTACCTCA#.(((((((((((..((((((((#)))))).))))))))))))).	6265	6286	1.0	-20.8	1	0.07302927	0.632	0.0	0.0	-5.9392953675437665	19	21	13	3UTR	MIRT471270	1	1
hsa-let-7d-5p	NM_175840	SMOX	AGAGGTAGTAGGTTGCATAGTT#AGCTAGCCGCCCTGACTGCCTTC#.((((((((.(((.((.(((((#))))))).)))...)))))))).	1799	1822	1.0	-19.9	1	0.009699199	0.529	4.87495875	3.3011018650000006	-5.892671223205703	18	23	8	3UTR	MIRT032103	0	0
hsa-let-7d-5p	NM_175852	TXLNA	AGAGGTAGTAGGTTGCATAGTT#ACTGATCTGCATCAGAGTTGCCTGCTATTCTCTG#(((((((((((((((((((((.#))))...))))........))))))))).)))).	3493	3527	1.0	-19.2	1	0.001618978	0.515	0.3305690787878789	1.0025081450000002	-3.937574446201665	21	34	9	3UTR	MIRT068153	1	1
hsa-let-7d-5p	NM_175921	RIMOC1	AGAGGTAGTAGGTTGCATAGTT#ACCTACCTACCTCTT#(((((((((((((.........#)))))).))))))).	3329	3344	1.0	-17.9	1	0.08543608	0.588	3.602835	2.21255496875	-5.762913004276319	13	15	7	3UTR	MIRT215719	1	1
hsa-let-7d-5p	NM_177966	PDE12	AGAGGTAGTAGGTTGCATAGTT#TGCAACCTCCACCTCC#.(((((.(.((((((((.....#))))))))).))))).	6673	6689	1.0	-20.5	0	0.003898555	0.397	0.0	0.0	-6.3934010304742	14	16	9	3UTR	MIRT120920	1	1
hsa-let-7d-5p	NM_177966	PDE12	AGAGGTAGTAGGTTGCATAGTT#GGCTCACTGCAACCTCCGCCCCCTGGGTTTAAGCGATTCTCCTGCCTCA#.(((((((.((((((((.((((#))))...))))))))..........................))))))).	2326	2375	1.0	-20.5	1	0.005513762	0.412	-0.04790817500000001	0.08448305999999997	-4.849714495602881	19	49	8	3UTR	MIRT120920	1	1
hsa-let-7d-5p	NM_178039	ERC1	AGAGGTAGTAGGTTGCATAGTT#GTGCACCCGCTGCCTTC#.((((((((.((.(((((....#))))))).)))))))).	9034	9051	1.0	-20.6	1	1.585731e-06	0.426	0.0	0.0	-6.32496191835154	15	17	8	3UTR	MIRT032135	0	0
hsa-let-7d-5p	NM_178040	ERC1	AGAGGTAGTAGGTTGCATAGTT#GTGCACCCGCTGCCTTC#.((((((((.((.(((((....#))))))).)))))))).	9118	9135	1.0	-20.6	1	1.585731e-06	0.426	0.0	0.0	-6.32496191835154	15	17	8	3UTR	MIRT032135	0	0
hsa-let-7d-5p	NM_178819	GPAT4	AGAGGTAGTAGGTTGCATAGTT#GCTGGAGTGCAATGGCACAATCTCAGCTCCACTGCAACCTCTACCTCC#.(((((((.((((((((.....#.))))))))))))))).	5179	5227	1.0	-25.3	1	0.02850893	0.456	0.0	0.0	-4.849714495602881	15	17	15	3UTR	MIRT735650	1	1
hsa-let-7d-5p	NM_181425	FXN	AGAGGTAGTAGGTTGCATAGTT#GCAGCCTCGACCTCC#.(((((.(.(((((((......#)))))))).))))).	3717	3732	1.0	-20.0	0	0.002116747	0.426	0.0	0.0	-6.3934010304742	13	15	8	3UTR	MIRT454281	0	0
hsa-let-7d-5p	NM_182757	RNF144B	AGAGGTAGTAGGTTGCATAGTT#GTAGCCCACTGCCTCA#.((((((((.((((((......#)))))).)))))))).	3246	3262	1.0	-23.4	1	0.00110158	0.632	0.0	0.0	-5.035831305685297	14	16	8	3UTR	MIRT469103	0	0
hsa-let-7d-5p	NM_194298	SLC16A9	AGAGGTAGTAGGTTGCATAGTT#CTATTTTTTATGTAGTGTATGCGTAGCCTCTATCTCG#.(((((((.((((((((((...#.))))))..))))))))))).	2092	2129	1.0	-20.4	1	0.0535855	0.618	0.0	0.0	-4.849714495602881	17	21	11	3UTR	MIRT543869	1	1
hsa-let-7d-5p	NM_198332	STAT2	AGAGGTAGTAGGTTGCATAGTT#GCAATCCTCCTACCTCA#.(((((((.(((((((......#)))).))).))))))).	3483	3500	1.0	-21.5	1	0.01222583	0.426	-0.054116462500000004	-0.11784853375000004	-4.849714495602881	14	17	7	3UTR	MIRT681507	0	0
hsa-let-7d-5p	NM_198401	ANKRD46	AGAGGTAGTAGGTTGCATAGTT#AACTACATACTATGATCAAGTATATTGCATCCTAACGCTACCTCTG#((((((((((((.((((.....#.)))).)))...))))))))).	1138	1184	1.0	-22.4	1	0.09462628	0.588	0.9507777666666667	1.0854543962500003	-5.226705058867908	16	22	9	3UTR	MIRT449006	1	1
hsa-let-7d-5p	NM_198401	ANKRD46	AGAGGTAGTAGGTTGCATAGTT#CTGAGTAACTGGCTGCTTCA#.((((((((.((((((.(((..#))).)))))).)))))))).	2417	2437	1.0	-20.5	1	0.0001667391	0.574	0.0	0.0	-5.035831305685297	17	20	8	3UTR	MIRT449006	1	1
hsa-let-7d-5p	NM_198514	NHLRC2	AGAGGTAGTAGGTTGCATAGTT#TGCAACCTCTACCTCC#.(((((((.((((((((.....#))))))))))))))).	4133	4149	1.0	-25.1	1	0.03490242	0.426	0.0	0.0	-4.849714495602881	15	16	15	3UTR	MIRT701425	1	0
hsa-let-7d-5p	NM_198514	NHLRC2	AGAGGTAGTAGGTTGCATAGTT#AGCTATGCTCCTTACTTACTTCTT#((((((((((((..((((((((#))))))))..)))))).)))))).	2537	2561	1.0	-23.0	1	0.3515012	0.721	0.0	0.0	-6.083544976388314	20	24	8	3UTR	MIRT701425	1	0
hsa-let-7d-5p	NM_198963	DHX57	AGAGGTAGTAGGTTGCATAGTT#GCTACTCACCTGCTTCTAGCTCACCTGGGAAATAACAGCAGAACCTCTACCTCG#.(((((((.(((((((......#.)))..))))))))))).	4337	4391	1.0	-20.1	1	0.02198152	0.471	0.0	0.0	-4.849714495602881	14	18	11	3UTR	MIRT051721	1	1
hsa-let-7d-5p	NM_201269	ZNF644	AGAGGTAGTAGGTTGCATAGTT#ACTCCAGTTGCATTTCTCAGACAATAAAGTGGTGCATCCATGCTACCTCC#.(((((((((((.(((((....#.))))).)).))))))))).	4721	4771	1.0	-24.2	1	0.01579386	0.603	0.8375557499999999	0.9293855162500001	-5.08245545002336	16	20	9	3UTR	MIRT032169	1	1
hsa-let-7d-5p	NM_001369846	ZBTB37	AGAGGTAGTAGGTTGCATAGTT#GACTCAAGCAATCCTCCTACCTCA#.(((((((.(((((((..((((#))))...)))).))).))))))).	10884	10908	1.0	-21.6	1	0.3321701	0.441	0.0	0.0	-4.849714495602881	18	24	7	3UTR	MIRT574364	1	0
hsa-let-7d-5p	NM_001369846	ZBTB37	AGAGGTAGTAGGTTGCATAGTT#AGCTGTGTGGCCTTCCTACTGATA#(..(((((.(((((((((((((#)))))))))))))..)))))..).	11656	11680	1.0	-21.2	0	0.006697692	0.574	0.0	0.0	-7.715179460769049	19	24	13	3UTR	MIRT574364	1	0
hsa-let-7d-5p	NM_001370208	FBXL20	AGAGGTAGTAGGTTGCATAGTT#TGCAACCTCTGCCTCC#.(((((((.((((((((.....#))))))))))))))).	6850	6866	1.0	-25.1	1	0.0003000648	0.485	0.0	0.0	-4.849714495602881	15	16	15	3UTR	MIRT548266	0	0
hsa-let-7d-5p	NM_001370208	FBXL20	AGAGGTAGTAGGTTGCATAGTT#GCTGATTTGCAGCCTACACCA#...(((.((((((((((((((.#))))...))))))))))))).	4746	4767	1.0	-21.8	0	0.0001746274	0.618	0.0	0.0	-8.058226728550057	17	21	13	3UTR	MIRT548266	0	0
hsa-let-7d-5p	NM_001370208	FBXL20	AGAGGTAGTAGGTTGCATAGTT#GGCATGCACCACTACTGCCTG#..((((((((((.(((((.(((#)))))))).).))))))))).	3253	3274	1.0	-21.0	1	0.001227333	0.559	0.0	0.0	-6.246131332038532	18	21	9	3UTR	MIRT548266	0	0
hsa-let-7d-5p	NM_001371411	SLC19A3	AGAGGTAGTAGGTTGCATAGTT#TGCAACCTCCGCCTCC#.(((((.(.((((((((.....#))))))))).))))).	4141	4157	1.0	-20.8	0	0.0008064102	0.412	0.0	0.0	-6.3934010304742	14	16	9	3UTR	MIRT681942	0	0
hsa-let-7d-5p	NM_001371411	SLC19A3	AGAGGTAGTAGGTTGCATAGTT#GACTTCAGGTGATCTGTCTGCCTCG#.(((((((((((((((..((((#))))....)))))))).))))))).	3079	3104	1.0	-21.5	1	0.002253865	0.456	0.0	0.0	-3.793324837357118	19	25	8	3UTR	MIRT681942	0	0
hsa-let-7d-5p	NM_001376376	CELF1	AGAGGTAGTAGGTTGCATAGTT#GCTGTGCTCCCTAGCCTTC#.(((((..((((..(((((((.#)))))))..))))))))).	4095	4114	1.0	-20.0	0	0.006854348	0.412	3.9176767142857143	4.502087899999999	-9.796616831595719	16	19	9	3UTR	MIRT502840	1	0
hsa-let-7d-5p	NM_001376857	TXLNA	AGAGGTAGTAGGTTGCATAGTT#ACTGATCTGCATCAGAGTTGCCTGCTATTCTCTG#(((((((((((((((((((((.#))))...))))........))))))))).)))).	3640	3674	1.0	-19.2	1	0.001618978	0.515	0.0	0.0	-3.937574446201665	21	34	9	3UTR	MIRT068153	1	1
hsa-let-7d-5p	NM_001377960	RBM12B	AGAGGTAGTAGGTTGCATAGTT#GATTCTTGATCCATATATCACCTGTTAAGTAGTGACCTTGCTGCCTCTG#((((((((((((((((.((.((#.)).))))))))).))))))))).	6395	6444	1.0	-23.3	1	0.0004814681	0.632	0.0	0.0	-3.937574446201665	20	24	9	3UTR	MIRT543786	0	0
hsa-let-7d-5p	NM_001377960	RBM12B	AGAGGTAGTAGGTTGCATAGTT#GACTCCAGTTCATGCTTTTGCTGCCTCA#.(((((((((((..((((....#.)))).))))))))))).	4600	4628	1.0	-20.1	1	0.01605199	0.618	0.0	0.0	-5.9392953675437665	15	18	11	3UTR	MIRT543786	0	0
hsa-let-7d-5p	NM_001377963	RBM12B	AGAGGTAGTAGGTTGCATAGTT#GATTCTTGATCCATATATCACCTGTTAAGTAGTGACCTTGCTGCCTCTG#((((((((((((((((.((.((#.)).))))))))).))))))))).	6340	6389	1.0	-23.3	1	0.0004814681	0.632	0.0	0.0	-3.937574446201665	20	24	9	3UTR	MIRT543786	0	0
hsa-let-7d-5p	NM_001377963	RBM12B	AGAGGTAGTAGGTTGCATAGTT#GACTCCAGTTCATGCTTTTGCTGCCTCA#.(((((((((((..((((....#.)))).))))))))))).	4545	4573	1.0	-20.1	1	0.01605199	0.618	0.0	0.0	-5.9392953675437665	15	18	11	3UTR	MIRT543786	0	0
hsa-let-7d-5p	NM_001379446	SLC11A2	AGAGGTAGTAGGTTGCATAGTT#TGTAACCTCTACCTCC#.(((((((.((((((((.....#))))))))))))))).	3099	3115	1.0	-23.1	1	0.08246197	0.5	0.0	0.0	-4.849714495602881	15	16	15	3UTR	MIRT004505	0	0
hsa-let-7d-5p	NM_001379446	SLC11A2	AGAGGTAGTAGGTTGCATAGTT#GTGATCTACCTGCCTCA#.(((((((((((((((......#))))))))).)))))).	3235	3252	1.0	-20.7	1	0.004126569	0.485	0.0	0.0	-3.793324837357118	15	17	9	3UTR	MIRT004505	0	0
hsa-let-7d-5p	NM_001385111	STAT2	AGAGGTAGTAGGTTGCATAGTT#TGCAGCCTCAACCTCC#.(((((.(.((((((((.....#))))))))).))))).	3371	3387	1.0	-20.5	0	0.0008882302	0.441	0.0	0.0	-6.3934010304742	14	16	9	3UTR	MIRT681507	0	0
hsa-let-7d-5p	NM_001385114	STAT2	AGAGGTAGTAGGTTGCATAGTT#TGCAGCCTCAACCTCC#.(((((.(.((((((((.....#))))))))).))))).	3449	3465	1.0	-20.5	0	0.0008882302	0.441	0.73693725	1.1831064612500004	-6.3934010304742	14	16	9	3UTR	MIRT681507	0	0
hsa-let-7d-5p	NM_001395199	ZBTB37	AGAGGTAGTAGGTTGCATAGTT#GACTCAAGCAATCCTCCTACCTCA#.(((((((.(((((((..((((#))))...)))).))).))))))).	10836	10860	1.0	-21.6	1	0.3321701	0.441	0.0	0.0	-4.849714495602881	18	24	7	3UTR	MIRT574364	1	0
hsa-let-7d-5p	NM_001395199	ZBTB37	AGAGGTAGTAGGTTGCATAGTT#AGCTGTGTGGCCTTCCTACTGATA#(..(((((.(((((((((((((#)))))))))))))..)))))..).	11608	11632	1.0	-21.2	0	0.006697692	0.574	0.0	0.0	-7.715179460769049	19	24	13	3UTR	MIRT574364	1	0
hsa-let-7d-5p	NM_001395918	ICOSLG	AGAGGTAGTAGGTTGCATAGTT#TGGAACCTGCTCCTTCTG#(((((.((((((((.((.....#)).)))))))).))))).	7497	7515	1.0	-19.8	0	0.004633658	0.485	0.0	0.0	-6.573982767645346	15	18	8	3UTR	MIRT475380	0	0
hsa-let-7d-5p	NM_014584	ERO1A	AGAGGTAGTAGGTTGCATAGTT#TGCAAGCTCTGCCTTC#.(((((((.((.(((((.....#))))).))))))))).	3498	3514	1.0	-19.1	1	0.002101551	0.426	0.4591517142857144	1.3552724537499996	-8.196517805199235	14	16	9	3UTR	MIRT735647	1	1
hsa-let-7d-5p	NM_014598	SOCS7	AGAGGTAGTAGGTTGCATAGTT#CCTGCTGCCTCG#.(((((((((((..........#))))))))))).	6160	6172	1.0	-20.2	1	0.08510256	0.515	0.30975059999999993	0.008097627500000093	-6.907794008098015	11	12	11	3UTR	MIRT735663	0	1
hsa-let-7d-5p	NM_014598	SOCS7	AGAGGTAGTAGGTTGCATAGTT#GCATCCCTATTGCTTCTG#((((((((((((.(((......#)))..)))))))))))).	2979	2997	1.0	-20.5	1	0.01346536	0.515	0.30852463333333335	0.32474663249999997	-5.226705058867908	15	18	12	3UTR	MIRT735663	0	1
hsa-let-7d-5p	NM_014672	PRORP	AGAGGTAGTAGGTTGCATAGTT#GGCTGGAGTGCAATGGTTTGATCTCAGTTCACTGCAACCTCTGCCTCC#.(((((((.((((((((.....#.))))))))))))))).	5633	5681	1.0	-25.3	1	0.00142087	0.485	0.08779421250000004	-0.24005283249999998	-4.849714495602881	15	17	15	3UTR	MIRT549800	1	0
hsa-let-7d-5p	NM_014685	HERPUD1	AGAGGTAGTAGGTTGCATAGTT#TGCAACCTCTACCTCC#.(((((((.((((((((.....#))))))))))))))).	2530	2546	1.0	-25.1	1	0.03432611	0.382	-0.382004125	-0.36937428250000004	-4.849714495602881	15	16	15	3UTR	MIRT475734	0	0
hsa-let-7d-5p	NM_014795	ZEB2	AGAGGTAGTAGGTTGCATAGTT#CTATTAAACGAGTCGCCTACTACCTA#..(((((((((((.((...(((#.)))..)).))))))))))).	9076	9102	1.0	-20.9	1	0.08459172	0.632	3.577583090909091	3.7716395	-5.813840636892696	16	21	11	3UTR	MIRT439136	0	0
hsa-let-7d-5p	NM_014901	RNF44	AGAGGTAGTAGGTTGCATAGTT#GCGTGTGGGGCCGGCACATCCTAGCAGGCAGCCCCTGGCGCCTGCTGCCTCA#.(((((((((((.(((.(((..#.))))))))))))))))).	3132	3184	1.0	-25.6	1	8.712416e-06	0.338	5.107846545454546	5.440737275	-5.08245545002336	17	19	17	3UTR	MIRT501349	1	1
hsa-let-7d-5p	NM_015042	ZNF609	AGAGGTAGTAGGTTGCATAGTT#ACTAAGTCCTGCTGCTTCTT#((((((((((((..((.((((.#)))).)))))))))))))).	5429	5449	1.0	-20.4	1	0.07347409	0.485	1.7045650166666662	0.7343726550000002	-6.083544976388314	18	20	14	3UTR	MIRT735669	0	0
hsa-let-7d-5p	NM_015155	LARP4B	AGAGGTAGTAGGTTGCATAGTT#TGCGGCTTGCGTGCCTCG#.((((((((((((((((.....#)))))))))).)))))).	5660	5678	1.0	-23.1	1	7.678679e-09	0.324	2.1026602705882356	3.494888601250002	-3.793324837357118	16	18	10	3UTR	MIRT032113	0	0
hsa-let-7d-5p	NM_015257	NEMP1	AGAGGTAGTAGGTTGCATAGTT#AACTGTCCTAAGTGACAACTACCTCA#.((((((((..(((((.(((..#.))).))))).)))))))).	2852	2878	1.0	-20.0	1	0.001346733	0.588	0.93937675	0.43202251875	-7.8606057810956464	16	20	8	3UTR	MIRT032144	1	1
hsa-let-7d-5p	NM_015264	KIAA0930	AGAGGTAGTAGGTTGCATAGTT#CTGTGCAGCCAGTATATTCTAATGACTGCCTG#..(((((((.((((((((((..#))))))))))..............))))))).	5047	5079	1.0	-22.3	1	0.006960036	0.559	5.038534199999999	5.059019522500001	-6.199507187700468	17	32	10	3UTR	MIRT474760	1	1
hsa-let-7d-5p	NM_015306	USP24	AGAGGTAGTAGGTTGCATAGTT#AGCTTGGAACAAGCAGACTGGAATTTTCCTCTGCTACCTCTT#((((((((((((((((......#.)))).............)))))))))))).	10625	10667	1.0	-19.5	1	0.008714041	0.676	0.39487402068965527	0.29373732125	-3.937574446201665	16	31	12	3UTR	MIRT032176	1	1
hsa-let-7d-5p	NM_015607	CHTOP	AGAGGTAGTAGGTTGCATAGTT#GGCTGTGGACTTACTTGCCA#...(((((((((((.(((((((#))))))))))))))).))).	1153	1173	1.0	-19.0	0	0.0001522929	0.544	1.3967990833333335	1.756089409375	-7.249989753929374	18	20	15	3UTR	MIRT266625	0	0
hsa-let-7d-5p	NM_016352	CPA4	AGAGGTAGTAGGTTGCATAGTT#GAGTGTGATGGCTCGATCTTGGCTCACCACAACCTCTGCCTCC#.(((((((.((((((.......#.))))))))))))).	1878	1921	1.0	-20.6	1	0.0491033	0.426	-0.212389	-0.04694279624999997	-5.082763575906494	13	15	13	3UTR	MIRT682605	1	1
hsa-let-7d-5p	NM_016352	CPA4	AGAGGTAGTAGGTTGCATAGTT#CAACCAGCTGCCTCTT#(((((((((.(((((.......#))))).))))))))).	2612	2628	1.0	-20.2	1	0.03620541	0.559	0.13361884222222217	0.22160686925000003	-5.413129994833456	14	16	9	3UTR	MIRT682605	1	1
hsa-let-7d-5p	NM_016620	ZNF644	AGAGGTAGTAGGTTGCATAGTT#ACTCCAGTTGCATTTCTCAGACAATAAAGTGGTGCATCCATGCTACCTCC#.(((((((((((.(((((....#.))))).)).))))))))).	1242	1292	1.0	-24.2	1	0.01579386	0.603	1.308440583333333	2.3937760237499996	-5.08245545002336	16	20	9	3UTR	MIRT032169	1	1
hsa-let-7d-5p	NM_016654	GABPB1	AGAGGTAGTAGGTTGCATAGTT#CTGTGCACCTAGAATCG#...(((..((((.(((((((..#)))))))))))..))).	3970	3987	1.0	-17.0	0	0.007280944	0.618	5.567162857142857	4.876667407499998	-11.660992270396932	14	17	11	3UTR	MIRT476549	0	0
hsa-let-7d-5p	NM_017774	CDKAL1	AGAGGTAGTAGGTTGCATAGTT#GGCTGGAGTGGTGCAGTGGCACGATCTCAGGTCACTGCAACCTCTGCCTCC#.(((((((.((((((((.....#.))))))))))))))).	2335	2386	1.0	-25.3	1	0.001071558	0.412	-0.11381425	-0.0020567137499999527	-4.849714495602881	15	17	15	3UTR	MIRT681761	0	0
hsa-let-7d-5p	NM_017964	SLC30A6	AGAGGTAGTAGGTTGCATAGTT#TGCAACCTCTGCCTCC#.(((((((.((((((((.....#))))))))))))))).	1945	1961	1.0	-25.1	1	0.005225428	0.456	0.032934	0.025856172499999927	-4.849714495602881	15	16	15	3UTR	MIRT032161	1	0
hsa-let-7d-5p	NM_018085	IPO9	AGAGGTAGTAGGTTGCATAGTT#GCTTGTGCCCCTGCTGCTTCA#.(((((((((((..(((((((.#))).)))).))))))))))).	5276	5297	1.0	-23.0	1	8.065035e-05	0.456	-0.5447104727272727	-0.19763976249999998	-5.9392953675437665	18	21	11	3UTR	MIRT702714	1	0
hsa-let-7d-5p	NM_001193513	SLC30A6	AGAGGTAGTAGGTTGCATAGTT#TGCAACCTCTGCCTCC#.(((((((.((((((((.....#))))))))))))))).	2065	2081	1.0	-25.1	1	0.005225428	0.456	0.032934	0.025856172499999927	-4.849714495602881	15	16	15	3UTR	MIRT032161	1	0
hsa-let-7d-5p	NM_001193514	SLC30A6	AGAGGTAGTAGGTTGCATAGTT#TGCAACCTCTGCCTCC#.(((((((.((((((((.....#))))))))))))))).	1876	1892	1.0	-25.1	1	0.005225428	0.456	0.304248	0.03647258999999995	-4.849714495602881	15	16	15	3UTR	MIRT032161	1	0
hsa-let-7d-5p	NM_001193514	SLC30A6	AGAGGTAGTAGGTTGCATAGTT#CTGTGTGAGGTTTTATGCCTACTTCCTCA#.((((.((((((((((((((..#))))))).........))))))).)))).	3570	3599	1.0	-21.1	0	0.01637264	0.559	0.08518301304347826	0.19512146875000003	-5.694283598550164	18	29	7	3UTR	MIRT032161	1	0
hsa-let-7d-5p	NM_001193515	SLC30A6	AGAGGTAGTAGGTTGCATAGTT#TGCAACCTCTGCCTCC#.(((((((.((((((((.....#))))))))))))))).	1858	1874	1.0	-25.1	1	0.005225428	0.456	0.304248	0.03647258999999995	-4.849714495602881	15	16	15	3UTR	MIRT032161	1	0
hsa-let-7d-5p	NM_001199671	CALU	AGAGGTAGTAGGTTGCATAGTT#ACAATGCAAACCACTTACTACCA#...(((((((((((((((.((.#)).)))))....)))))))))).	3082	3105	1.0	-19.4	0	0.09680584	0.515	2.0860211578947365	1.4243667304999998	-6.514540193678739	17	23	10	3UTR	MIRT123316	1	1
hsa-let-7d-5p	NM_001199672	CALU	AGAGGTAGTAGGTTGCATAGTT#ACAATGCAAACCACTTACTACCA#...(((((((((((((((.((.#)).)))))....)))))))))).	3082	3105	1.0	-19.4	0	0.09680584	0.515	2.0860211578947365	1.4243667304999998	-6.514540193678739	17	23	10	3UTR	MIRT123316	1	1
hsa-let-7d-5p	NM_001199673	CALU	AGAGGTAGTAGGTTGCATAGTT#ACAATGCAAACCACTTACTACCA#...(((((((((((((((.((.#)).)))))....)))))))))).	2067	2090	1.0	-19.4	0	0.09680584	0.515	2.0860211578947365	1.4243667304999998	-6.514540193678739	17	23	10	3UTR	MIRT123316	1	1
hsa-let-7d-5p	NM_001202514	MXD1	AGAGGTAGTAGGTTGCATAGTT#TTGTGCGATGTTCTTGGGACCTCGCTGTGTTCTGCTATCTCG#.(((((((((((..(((((((.#.)))))))))))))))))).	1558	1600	1.0	-23.1	1	0.001200132	0.5	0.5025865636363636	0.47015315624999987	-5.9392953675437665	18	20	18	3UTR	MIRT303319	1	1
hsa-let-7d-5p	NM_001202514	MXD1	AGAGGTAGTAGGTTGCATAGTT#GCGCCTGCACCTCG#.(((((.(((((.(((......#))))))))))))).	2452	2466	1.0	-19.7	0	0.000436871	0.412	0.19433920000000002	0.57764085	-6.626141984894679	13	14	13	3UTR	MIRT303319	1	1
hsa-let-7d-5p	NM_001204171	MDM4	AGAGGTAGTAGGTTGCATAGTT#GCAACCTCTGCCTCC#.(((((((.(((((((......#)))))))))))))).	4179	4194	1.0	-24.6	1	0.002025972	0.397	0.2625164285714286	-0.12318265	-4.849714495602881	14	15	14	3UTR	MIRT112241	1	1
hsa-let-7d-5p	NM_001204172	MDM4	AGAGGTAGTAGGTTGCATAGTT#GCAACCTCTGCCTCC#.(((((((.(((((((......#)))))))))))))).	3351	3366	1.0	-24.6	1	0.002025972	0.397	0.2625164285714286	-0.12318265	-4.849714495602881	14	15	14	3UTR	MIRT112241	1	1
hsa-let-7d-5p	NM_001204817	ZNF587	AGAGGTAGTAGGTTGCATAGTT#TGCAACCTCTGCCTCC#.(((((((.((((((((.....#))))))))))))))).	2698	2714	1.0	-25.1	1	0.01256908	0.471	0.28338304999999997	-0.03901471287499998	-4.849714495602881	15	16	15	3UTR	MIRT457678	0	1
hsa-let-7d-5p	NM_001204817	ZNF587	AGAGGTAGTAGGTTGCATAGTT#AGCTCATTGCAACCTCTGCTTCC#.(((((((.((((((((.((((#))))...))))))))))))))).	3164	3187	1.0	-23.3	1	0.01705784	0.412	0.07829850000000001	-0.01179768750000007	-4.849714495602881	19	23	15	3UTR	MIRT457678	0	1
hsa-let-7d-5p	NM_001206612	CHTOP	AGAGGTAGTAGGTTGCATAGTT#GGCTGTGGACTTACTTGCCA#...(((((((((((.(((((((#))))))))))))))).))).	1156	1176	1.0	-19.0	0	0.0001522929	0.544	1.4062049166666661	1.712353759375	-7.249989753929374	18	20	15	3UTR	MIRT266625	0	0
hsa-let-7d-5p	NM_001206866	IL6R	AGAGGTAGTAGGTTGCATAGTT#TGCAAGCTCTGCCTCTT#((((((((.((.(((((.....#))))).)))))))))).	1591	1608	1.0	-21.7	1	0.0001196293	0.456	-0.08055199999999998	-0.1317847625	-8.340767414043784	15	17	10	3UTR	MIRT761006	1	0
hsa-let-7d-5p	NM_001207067	BZW1	AGAGGTAGTAGGTTGCATAGTT#TGCAATCTCTGCCTCC#.(((((((.((((((((.....#))))))))))))))).	4313	4329	1.0	-22.5	1	0.02175361	0.471	0.164748375	-0.10800601249999994	-4.849714495602881	15	16	15	3UTR	MIRT300036	1	1
hsa-let-7d-5p	NM_001207068	BZW1	AGAGGTAGTAGGTTGCATAGTT#TGCAATCTCTGCCTCC#.(((((((.((((((((.....#))))))))))))))).	4340	4356	1.0	-22.5	1	0.02175361	0.471	0.164748375	-0.10800601249999994	-4.849714495602881	15	16	15	3UTR	MIRT300036	1	1
hsa-let-7d-5p	NM_001207069	BZW1	AGAGGTAGTAGGTTGCATAGTT#TGCAATCTCTGCCTCC#.(((((((.((((((((.....#))))))))))))))).	4357	4373	1.0	-22.5	1	0.02175361	0.471	0.0	0.0	-4.849714495602881	15	16	15	3UTR	MIRT300036	1	1
hsa-let-7d-5p	NM_001219	CALU	AGAGGTAGTAGGTTGCATAGTT#ACAATGCAAACCACTTACTACCA#...(((((((((((((((.((.#)).)))))....)))))))))).	2267	2290	1.0	-19.4	0	0.09680584	0.515	2.0860211578947365	1.4243667304999998	-6.514540193678739	17	23	10	3UTR	MIRT123316	1	1
hsa-let-7d-5p	NM_001241	CCNT2	AGAGGTAGTAGGTTGCATAGTT#GCTGTTGCTGCCACTGCTTCA#.((((((((.(((.(((((((.#))))).)).))))))))))).	2216	2237	1.0	-21.6	1	0.0001130102	0.559	1.414454625	3.47754809875	-5.892671223205703	18	21	11	3UTR	MIRT548972	1	1
hsa-let-7d-5p	NM_001244664	CHTOP	AGAGGTAGTAGGTTGCATAGTT#GGCTGTGGACTTACTTGCCA#...(((((((((((.(((((((#))))))))))))))).))).	831	851	1.0	-19.0	0	0.0001522929	0.544	1.4062049166666661	1.712353759375	-7.249989753929374	18	20	15	3UTR	MIRT266625	0	0
hsa-let-7d-5p	NM_001256425	PDLIM5	AGAGGTAGTAGGTTGCATAGTT#AACTGAATACTTCTCCAATAGCAACCCCAAGCTACCTCC#.((((((((.((((((......#.))))))....)))))))).	3727	3766	1.0	-21.7	1	0.003963686	0.485	0.8281810000000001	1.3147997875000001	-5.035831305685297	14	20	8	3UTR	MIRT735657	0	0
hsa-let-7d-5p	NM_001256426	PDLIM5	AGAGGTAGTAGGTTGCATAGTT#AACTGAATACTTCTCCAATAGCAACCCCAAGCTACCTCC#.((((((((.((((((......#.))))))....)))))))).	4233	4272	1.0	-21.7	1	0.003963686	0.485	0.8281810000000001	1.3147997875000001	-5.035831305685297	14	20	8	3UTR	MIRT735657	0	0
hsa-let-7d-5p	NM_001256429	PDLIM5	AGAGGTAGTAGGTTGCATAGTT#AACTGTGCTGTGCGCTCACATGACTGTATGGAAGAGCTGGCTTTCCAACAGTTATGCTGTGCTGCCTCTT#((((((((((....((((((..#.))))))..)))))))))).	855	925	1.0	-20.8	1	0.02186373	0.647	0.042664051000000036	0.10822256387499998	-12.25512276139502	16	20	10	3UTR	MIRT735657	0	0
hsa-let-7d-5p	NM_001256678	PRORP	AGAGGTAGTAGGTTGCATAGTT#GGCTGGAGTGCAATGGTTTGATCTCAGTTCACTGCAACCTCTGCCTCC#.(((((((.((((((((.....#.))))))))))))))).	5585	5633	1.0	-25.3	1	0.00142087	0.485	0.08779421250000004	-0.24005283249999998	-4.849714495602881	15	17	15	3UTR	MIRT549800	1	0
hsa-let-7d-5p	NM_001256679	PRORP	AGAGGTAGTAGGTTGCATAGTT#GGCTGGAGTGCAATGGTTTGATCTCAGTTCACTGCAACCTCTGCCTCC#.(((((((.((((((((.....#.))))))))))))))).	5080	5128	1.0	-25.3	1	0.00142087	0.485	0.08779421250000004	-0.24005283249999998	-4.849714495602881	15	17	15	3UTR	MIRT549800	1	0
hsa-let-7d-5p	NM_001256680	PRORP	AGAGGTAGTAGGTTGCATAGTT#GGCTGGAGTGCAATGGTTTGATCTCAGTTCACTGCAACCTCTGCCTCC#.(((((((.((((((((.....#.))))))))))))))).	4628	4676	1.0	-25.3	1	0.00142087	0.485	0.08779421250000004	-0.24005283249999998	-4.849714495602881	15	17	15	3UTR	MIRT549800	1	0
hsa-let-7d-5p	NM_001256681	PRORP	AGAGGTAGTAGGTTGCATAGTT#GGCTGGAGTGCAATGGTTTGATCTCAGTTCACTGCAACCTCTGCCTCC#.(((((((.((((((((.....#.))))))))))))))).	4580	4628	1.0	-25.3	1	0.00142087	0.485	0.0	0.0	-4.849714495602881	15	17	15	3UTR	MIRT549800	1	0
hsa-let-7d-5p	NM_001256681	PRORP	AGAGGTAGTAGGTTGCATAGTT#GGCTCAAGCAATCTTCCTACCTCA#.(((((((.(((((((......#.)))))))..))))))).	1752	1776	1.0	-21.5	1	0.03934499	0.471	0.0	0.0	-4.849714495602881	14	18	7	3UTR	MIRT549800	1	0
hsa-let-7d-5p	NM_001259	CDK6	AGAGGTAGTAGGTTGCATAGTT#ATGCAGTCCTTCTACCTG#..((((((.(((((((((....#)))))).))).)))))).	2734	2752	1.0	-20.0	1	0.01744173	0.618	1.2568537	1.42756907	-6.013390377618052	15	18	6	3UTR	MIRT000402	1	0
hsa-let-7d-5p	NM_001259	CDK6	AGAGGTAGTAGGTTGCATAGTT#ACTAAAGTGTTCCCTGCTACCATCC#.(((((((((((..((((....#.))))..))))))))).)).	10103	10128	1.0	-20.0	1	0.03093582	0.515	0.9735762916666668	1.29085137125	-5.9392953675437665	15	20	9	3UTR	MIRT000402	1	0
hsa-let-7d-5p	NM_001260494	RDX	AGAGGTAGTAGGTTGCATAGTT#GAGGGGACAACAATACTACCTCA#.(((((((((.((((.......#.))))..))))))))).	2551	2574	1.0	-18.7	1	0.002849269	0.544	5.391134444444444	4.892514652500001	-6.851148393071081	13	17	9	3UTR	MIRT521390	1	1
hsa-let-7d-5p	NM_001261390	CALCOCO2	AGAGGTAGTAGGTTGCATAGTT#GGCTGGCGTGCAATGGCGCAGTTGACTCACTACAGCCTCTGCCTCC#.(((((((.((((((..((((.#.))))))))))))))))).	2571	2617	1.0	-21.9	1	0.0006242216	0.441	0.006645657142857142	-0.26602815500000004	-5.082763575906494	17	19	17	3UTR	MIRT032106	0	0
hsa-let-7d-5p	NM_001261391	CALCOCO2	AGAGGTAGTAGGTTGCATAGTT#GGCTGGCGTGCAATGGCGCAGTTGACTCACTACAGCCTCTGCCTCC#.(((((((.((((((..((((.#.))))))))))))))))).	2562	2608	1.0	-21.9	1	0.0006242216	0.441	0.006645657142857142	-0.26602815500000004	-5.082763575906494	17	19	17	3UTR	MIRT032106	0	0
hsa-let-7d-5p	NM_001261393	CALCOCO2	AGAGGTAGTAGGTTGCATAGTT#GGCTGGCGTGCAATGGCGCAGTTGACTCACTACAGCCTCTGCCTCC#.(((((((.((((((..((((.#.))))))))))))))))).	2373	2419	1.0	-21.9	1	0.0006242216	0.441	0.006645657142857142	-0.26602815500000004	-5.082763575906494	17	19	17	3UTR	MIRT032106	0	0
hsa-let-7d-5p	NM_001261395	CALCOCO2	AGAGGTAGTAGGTTGCATAGTT#GGCTGGCGTGCAATGGCGCAGTTGACTCACTACAGCCTCTGCCTCC#.(((((((.((((((..((((.#.))))))))))))))))).	2309	2355	1.0	-21.9	1	0.0006242216	0.441	0.006645657142857142	-0.26602815500000004	-5.082763575906494	17	19	17	3UTR	MIRT032106	0	0
hsa-let-7d-5p	NM_001270377	ANKRD46	AGAGGTAGTAGGTTGCATAGTT#AACTACATACTATGATCAAGTATATTGCATCCTAACGCTACCTCTG#((((((((((((.((((.....#.)))).)))...))))))))).	1033	1079	1.0	-22.4	1	0.09462628	0.588	-0.14212893333333332	0.33599821119999995	-5.226705058867908	16	22	9	3UTR	MIRT449006	1	1
hsa-let-7d-5p	NM_001270378	ANKRD46	AGAGGTAGTAGGTTGCATAGTT#AACTACATACTATGATCAAGTATATTGCATCCTAACGCTACCTCTG#((((((((((((.((((.....#.)))).)))...))))))))).	1706	1752	1.0	-22.4	1	0.09462628	0.588	0.9798768241333333	0.43309506357499983	-5.226705058867908	16	22	9	3UTR	MIRT449006	1	1
hsa-let-7d-5p	NM_001270379	ANKRD46	AGAGGTAGTAGGTTGCATAGTT#CTGTGCTCCTGAGCCTCA#.(((((..((((..((((((..#)))))).)))).))))).	894	912	1.0	-21.2	0	2.446171e-05	0.5	0.0	0.0	-9.796616831595719	15	18	6	3UTR	MIRT449006	1	1
hsa-let-7d-5p	NM_001271629	MEF2D	AGAGGTAGTAGGTTGCATAGTT#TGCAGCCCTACCTCTG#((((((((..(((((((.....#))))))))))))))).	4112	4128	1.0	-22.9	1	0.002074813	0.382	2.7714548262500003	3.418824232624999	-6.236470572775607	15	16	15	3UTR	MIRT735654	1	0
hsa-let-7d-5p	NM_001276320	YOD1	AGAGGTAGTAGGTTGCATAGTT#TGAAGCCTACTACCTCA#.(((((((((((((.((.....#)).))))))))))))).	1275	1292	1.0	-23.8	1	0.0016612	0.529	0.4020566615384616	0.6890328212500001	-4.528774397607753	15	17	13	3UTR	MIRT510514	1	1
hsa-let-7d-5p	NM_001278312	NUP155	AGAGGTAGTAGGTTGCATAGTT#TGCAACCTCTGCCTCA#.(((((((.((((((((.....#))))))))))))))).	5593	5609	1.0	-25.6	1	0.002457378	0.412	0.0	0.0	-4.849714495602881	15	16	15	3UTR	MIRT506360	1	0
hsa-let-7d-5p	NM_001278516	MDM4	AGAGGTAGTAGGTTGCATAGTT#GCAACCTCTGCCTCC#.(((((((.(((((((......#)))))))))))))).	4261	4276	1.0	-24.6	1	0.002025972	0.397	0.2625164285714286	-0.12318265	-4.849714495602881	14	15	14	3UTR	MIRT112241	1	1
hsa-let-7d-5p	NM_001278517	MDM4	AGAGGTAGTAGGTTGCATAGTT#GCAACCTCTGCCTCC#.(((((((.(((((((......#)))))))))))))).	4035	4050	1.0	-24.6	1	0.002025972	0.397	0.2625164285714286	-0.12318265	-4.849714495602881	14	15	14	3UTR	MIRT112241	1	1
hsa-let-7d-5p	NM_001278518	MDM4	AGAGGTAGTAGGTTGCATAGTT#TGCAACCTCTGCCTCC#.(((((((.((((((((.....#))))))))))))))).	4402	4418	1.0	-25.1	1	0.002907259	0.412	0.0	0.0	-4.849714495602881	15	16	15	3UTR	MIRT112241	1	1
hsa-let-7d-5p	NM_001278518	MDM4	AGAGGTAGTAGGTTGCATAGTT#GCAACCTCTGCCTCC#.(((((((.(((((((......#)))))))))))))).	3850	3865	1.0	-24.6	1	0.002025972	0.397	0.0	0.0	-4.849714495602881	14	15	14	3UTR	MIRT112241	1	1
hsa-let-7d-5p	NM_001278519	MDM4	AGAGGTAGTAGGTTGCATAGTT#GCAACCTCTGCCTCC#.(((((((.(((((((......#)))))))))))))).	3660	3675	1.0	-24.6	1	0.002025972	0.397	0.2625164285714286	-0.12318265	-4.849714495602881	14	15	14	3UTR	MIRT112241	1	1
hsa-let-7d-5p	NM_001282868	RHD	AGAGGTAGTAGGTTGCATAGTT#TGCAACCTCTACCTCC#.(((((((.((((((((.....#))))))))))))))).	1504	1520	1.0	-25.1	1	0.02089599	0.441	0.07222562499999999	0.02347752499999998	-4.849714495602881	15	16	15	3UTR	MIRT453402	0	0
hsa-let-7d-5p	NM_001282869	RHD	AGAGGTAGTAGGTTGCATAGTT#TGCAACCTCTACCTCC#.(((((((.((((((((.....#))))))))))))))).	1535	1551	1.0	-25.1	1	0.02089599	0.441	0.0	0.0	-4.849714495602881	15	16	15	3UTR	MIRT453402	0	0
hsa-let-7d-5p	NM_001282870	RHD	AGAGGTAGTAGGTTGCATAGTT#TGCAACCTCTACCTCC#.(((((((.((((((((.....#))))))))))))))).	1638	1654	1.0	-25.1	1	0.02089599	0.441	0.07222562499999999	0.02347752499999998	-4.849714495602881	15	16	15	3UTR	MIRT453402	0	0
hsa-let-7d-5p	NM_001282871	RHD	AGAGGTAGTAGGTTGCATAGTT#TGCAACCTCTACCTCC#.(((((((.((((((((.....#))))))))))))))).	1705	1721	1.0	-25.1	1	0.02089599	0.441	0.07222562499999999	0.02347752499999998	-4.849714495602881	15	16	15	3UTR	MIRT453402	0	0
hsa-let-7d-5p	NM_001282872	RHD	AGAGGTAGTAGGTTGCATAGTT#TGCAACCTCTACCTCC#.(((((((.((((((((.....#))))))))))))))).	1808	1824	1.0	-25.1	1	0.02089599	0.441	0.07222562499999999	0.02347752499999998	-4.849714495602881	15	16	15	3UTR	MIRT453402	0	0
hsa-let-7d-5p	NM_001283052	ICOSLG	AGAGGTAGTAGGTTGCATAGTT#TGGAACCTGCTCCTTCTG#(((((.((((((((.((.....#)).)))))))).))))).	6843	6861	1.0	-19.8	0	0.004633658	0.485	0.0	0.0	-6.573982767645346	15	18	8	3UTR	MIRT475380	0	0
hsa-let-7d-5p	NM_001286407	RPUSD2	AGAGGTAGTAGGTTGCATAGTT#ACTTGCTACCTCC#.((((((((((((.........#)))))))))))).	1625	1638	1.0	-18.3	1	0.05615504	0.529	1.4516663333333335	1.4574409799999999	-5.618663395431772	12	13	12	3UTR	MIRT032131	1	1
hsa-let-7d-5p	NM_001289411	FAM104A	AGAGGTAGTAGGTTGCATAGTT#GCTGTGCCAAGGCCTCTACTTCC#.(((((((.((((((((((((.#)))))))...)))))))))))).	476	499	1.0	-23.0	1	0.0009557468	0.353	-0.028165073333333356	0.10759824625000004	-4.849714495602881	19	23	12	3UTR	MIRT032171	1	1
hsa-let-7d-5p	NM_001289411	FAM104A	AGAGGTAGTAGGTTGCATAGTT#TGCACTGAAATTAACTGCCATACTACCTCTC#(((((((((((((((((.....#))))............))).)))))))))).	1036	1067	1.0	-20.2	1	0.007533173	0.632	3.04670033	2.7563679475000002	-3.937574446201665	17	31	10	3UTR	MIRT032171	1	1
hsa-let-7d-5p	NM_001289412	FAM104A	AGAGGTAGTAGGTTGCATAGTT#CAGCCTGCTAACCTA#..(((((((((((((.......#)))))))))).))).	1951	1966	1.0	-18.2	1	0.001357397	0.485	0.0	0.0	-5.1900497996759025	13	15	10	3UTR	MIRT032171	1	1
hsa-let-7d-5p	NM_018360	TXLNG	AGAGGTAGTAGGTTGCATAGTT#GGCCTGCTGCTTTTG#((((((((((((((........#)))))))))))))).	3609	3624	1.0	-18.4	1	0.00012585	0.632	0.0	0.0	-4.906073086755913	14	15	14	3UTR	MIRT259478	1	1
hsa-let-7d-5p	NM_018373	SYNJ2BP	AGAGGTAGTAGGTTGCATAGTT#TGCAATCTCTGCCG#...(((((.((((((((.....#))))))))))))).	6052	6066	1.0	-18.4	0	0.001364622	0.397	0.2711377	0.8534161600000001	-7.570929851924502	13	14	13	3UTR	MIRT466720	1	0
hsa-let-7d-5p	NM_018428	UTP6	AGAGGTAGTAGGTTGCATAGTT#GGCTGGAGTGCAGTGGTGTGGTCTTACTGCAACCTCTGCCTCC#.(((((((.((((((((.....#.))))))))))))))).	4026	4069	1.0	-25.3	1	0.0004876471	0.456	2.1842495250000002	3.83922743	-4.849714495602881	15	17	15	3UTR	MIRT051727	0	0
hsa-let-7d-5p	NM_018566	YOD1	AGAGGTAGTAGGTTGCATAGTT#TGAAGCCTACTACCTCA#.(((((((((((((.((.....#)).))))))))))))).	1244	1261	1.0	-23.8	1	0.0016612	0.529	0.6200776153846154	0.5605018637499999	-4.528774397607753	15	17	13	3UTR	MIRT510514	1	1
hsa-let-7d-5p	NM_018662	DISC1	AGAGGTAGTAGGTTGCATAGTT#TTTTGTCATGTAATTTATTGCTTCA#.(((((((((((((((((....#.))))))))))))))))).	6867	6892	1.0	-19.7	1	0.04731609	0.794	1.5659815411764706	0.4654103574999999	-3.793324837357118	17	19	17	3UTR	MIRT452944	0	0
hsa-let-7d-5p	NM_018662	DISC1	AGAGGTAGTAGGTTGCATAGTT#TGCAACCTCTACCTCC#.(((((((.((((((((.....#))))))))))))))).	5879	5895	1.0	-25.1	1	0.001094966	0.412	-0.18731874999999998	-0.21779359000000004	-4.849714495602881	15	16	15	3UTR	MIRT452944	0	0
hsa-let-7d-5p	NM_019018	OTULINL	AGAGGTAGTAGGTTGCATAGTT#TGCAACCTCTACCTCC#.(((((((.((((((((.....#))))))))))))))).	3858	3874	1.0	-25.1	1	0.01923112	0.412	0.256930125	-0.11292609375000003	-4.849714495602881	15	16	15	3UTR	MIRT460501	0	0
hsa-let-7d-5p	NM_020165	RAD18	AGAGGTAGTAGGTTGCATAGTT#CTGTGCAAAAATTTGCTTCCTCTC#(((((.((((((((((((((..#)))))))...))))))).))))).	5036	5060	1.0	-20.8	0	0.1083028	0.515	3.119594117647059	3.492899534875	-5.838533207394711	19	24	7	3UTR	MIRT552004	0	0
hsa-let-7d-5p	NM_020165	RAD18	AGAGGTAGTAGGTTGCATAGTT#ACTTGGTCAGTTGCCTCCTGCCTCTA#((((((((.((((.((......#.)).)))).)))))))).	1753	1779	1.0	-20.4	1	0.04225303	0.632	-0.563826	0.030684165249999985	-5.850804021967834	14	18	8	3UTR	MIRT552004	0	0
hsa-let-7d-5p	NM_020351	COL8A1	AGAGGTAGTAGGTTGCATAGTT#TGCAACCTCTACCTCC#.(((((((.((((((((.....#))))))))))))))).	3646	3662	1.0	-25.1	1	0.003749856	0.485	0.15699778749999999	0.09028867124999995	-4.849714495602881	15	16	15	3UTR	MIRT461365	0	0
hsa-let-7d-5p	NM_020749	MTUS1	AGAGGTAGTAGGTTGCATAGTT#GCAAACCTTCTACCTCC#.(((((((.(((((((......#)))).))).))))))).	2618	2635	1.0	-21.0	1	0.302939	0.544	2.8272671125000004	2.1971262410000003	-4.849714495602881	14	17	7	3UTR	MIRT472738	1	1
hsa-let-7d-5p	NM_020749	MTUS1	AGAGGTAGTAGGTTGCATAGTT#TTGTGTTGTTCCCTGCTGTCCTCC#.(((((((((((..((((((..#)))))).....))))))).)))).	3450	3474	1.0	-19.1	1	0.0601276	0.559	0.4006111666666667	2.9745626624999995	-5.9392953675437665	17	24	7	3UTR	MIRT472738	1	1
hsa-let-7d-5p	NM_020776	KIAA1328	AGAGGTAGTAGGTTGCATAGTT#GCAGCCTGCATGCAGCG#.(..((((((((((((......#))))))))).)))..).	3166	3183	1.0	-19.0	0	2.415065e-05	0.456	-0.12383151538461537	0.17348819125000006	-8.382886586622757	13	17	9	3UTR	MIRT702485	0	0
hsa-let-7d-5p	NM_020786	PDP2	AGAGGTAGTAGGTTGCATAGTT#AACTGTGTCAGCCTGAGCCTTC#.(((((..((((((((((((((#))))))).))))))).))))).	2063	2085	1.0	-23.6	0	0.002112403	0.647	0.25720010666666676	0.4154737375000001	-7.650646301409068	19	22	7	3UTR	MIRT284527	1	1
hsa-let-7d-5p	NM_021117	CRY2	AGAGGTAGTAGGTTGCATAGTT#GTGGCCTGTGCCTCC#.((((((.((((((((......#)))))))))))))).	3017	3032	1.0	-19.1	1	8.449731e-05	0.412	0.261100625	0.47452674749999996	-6.106959766537749	14	15	14	3UTR	MIRT180602	1	1
hsa-let-7d-5p	NM_023923	PHACTR4	AGAGGTAGTAGGTTGCATAGTT#GCTGGAGTGCAGTGGCACAATCTTGGCTCAGAGCAACCTCTGCCTCC#.(((((((.(((((((......#.)))))))))))))).	5349	5396	1.0	-24.4	1	0.0001477664	0.426	-0.10206900000000003	-0.21489847499999998	-4.849714495602881	14	16	14	3UTR	MIRT682385	0	0
hsa-let-7d-5p	NM_023923	PHACTR4	AGAGGTAGTAGGTTGCATAGTT#AGCTCACTGCAACCTCCGCCTCC#.(((((.(.((((((((.((((#))))...))))))))).))))).	5029	5052	1.0	-21.7	0	0.0130708	0.397	-0.74840975	-0.129465975	-6.3934010304742	18	23	9	3UTR	MIRT682385	0	0
hsa-let-7d-5p	NM_024423	DSC3	AGAGGTAGTAGGTTGCATAGTT#TGCTCACTCCCTCACTCACCGATCAAAACCTGCTACCTCC#.(((((((((((((........#.))))))))))))).	5355	5395	1.0	-22.9	1	0.5004798	0.515	2.967428936153846	2.1756637826250005	-4.761823477911366	13	15	13	3UTR	MIRT051723	0	0
hsa-let-7d-5p	NM_025136	OPA3	AGAGGTAGTAGGTTGCATAGTT#TGCAACTTCTACCTCC#.(((((((.((((((((.....#))))))))))))))).	3992	4008	1.0	-22.4	1	0.1146813	0.441	0.0754298625	-0.16077162875	-4.849714495602881	15	16	15	3UTR	MIRT461093	0	1
hsa-let-7d-5p	NM_025191	EDEM3	AGAGGTAGTAGGTTGCATAGTT#ACTGTGCATATCCTCATACTTTTA#(((((((..(((.((((((((.#))))))))...)))..))))))).	6600	6624	1.0	-18.7	1	0.05550043	0.691	0.6798498749999999	2.0119431637500003	-8.596729646294301	18	24	8	3UTR	MIRT704030	1	1
hsa-let-7d-5p	NM_025243	SLC19A3	AGAGGTAGTAGGTTGCATAGTT#GACTTCAGGTGATCTGTCTGCCTCG#.(((((((((((((((..((((#))))....)))))))).))))))).	2989	3014	1.0	-21.5	1	0.002253865	0.456	0.2623336125	0.21852612624999992	-3.793324837357118	19	25	8	3UTR	MIRT681942	0	0
hsa-let-7d-5p	NM_001145064	CASTOR2	AGAGGTAGTAGGTTGCATAGTT#GGCTGGAGTGCAGTGGTGCGATCTCGGTTCGCTGCAACCTCTGCTTCC#.(((((((.((((((((.....#.))))))))))))))).	5959	6007	1.0	-22.6	1	0.001121484	0.412	0.007748128749999993	-0.24799825087500005	-4.849714495602881	15	17	15	3UTR	MIRT735643	0	0
hsa-let-7d-5p	NM_001145306	CDK6	AGAGGTAGTAGGTTGCATAGTT#ATGCAGTCCTTCTACCTG#..((((((.(((((((((....#)))))).))).)))))).	2743	2761	1.0	-20.0	1	0.01744173	0.618	3.259926300000001	1.662778595	-6.013390377618052	15	18	6	3UTR	MIRT000402	1	0
hsa-let-7d-5p	NM_001145306	CDK6	AGAGGTAGTAGGTTGCATAGTT#ACTAAAGTGTTCCCTGCTACCATCC#.(((((((((((..((((....#.))))..))))))))).)).	10112	10137	1.0	-20.0	1	0.03093582	0.515	0.5663209166666667	1.0092861912499997	-5.9392953675437665	15	20	9	3UTR	MIRT000402	1	0
hsa-let-7d-5p	NM_001160423	IGF2BP1	AGAGGTAGTAGGTTGCATAGTT#TGTGCGAAGTAAACTACCTCA#.((((((((...(((((((...#))))))).....)))))))).	3296	3317	1.0	-19.8	1	0.03130395	0.588	5.470498750000001	2.06577229375	-11.207409090692002	15	21	8	3UTR	MIRT032186	1	1
hsa-let-7d-5p	NM_001163446	CPA4	AGAGGTAGTAGGTTGCATAGTT#GAGTGTGATGGCTCGATCTTGGCTCACCACAACCTCTGCCTCC#.(((((((.((((((.......#.))))))))))))).	1779	1822	1.0	-20.6	1	0.0491033	0.426	-0.45623035714285715	-0.03670127874999998	-5.082763575906494	13	15	13	3UTR	MIRT682605	1	1
hsa-let-7d-5p	NM_001163446	CPA4	AGAGGTAGTAGGTTGCATAGTT#CAACCAGCTGCCTCTT#(((((((((.(((((.......#))))).))))))))).	2513	2529	1.0	-20.2	1	0.03620541	0.559	0.09186917555555556	0.03561190650000001	-5.413129994833456	14	16	9	3UTR	MIRT682605	1	1
hsa-let-7d-5p	NM_001164540	DISC1	AGAGGTAGTAGGTTGCATAGTT#TGCAACCTCTACCTCC#.(((((((.((((((((.....#))))))))))))))).	5513	5529	1.0	-25.1	1	0.001094966	0.412	0.0	0.0	-4.849714495602881	15	16	15	3UTR	MIRT452944	0	0
hsa-let-7d-5p	NM_001164829	C1orf210	AGAGGTAGTAGGTTGCATAGTT#TGCAACCTCCGCCTCC#.(((((.(.((((((((.....#))))))))).))))).	1047	1063	1.0	-20.8	0	0.006512281	0.426	2.4119444	1.8146845574999997	-6.3934010304742	14	16	9	3UTR	MIRT508402	0	0
hsa-let-7d-5p	NM_001165931	RRM2	AGAGGTAGTAGGTTGCATAGTT#AGCCAGTTAAAAGATGCAGCCTCACTGCTTCA#.(((((((((((((((((....#.))))))))).)))))))).	1710	1742	1.0	-25.6	1	0.0004475445	0.618	0.13338634888888892	0.41366029749999994	-3.793324837357118	17	20	9	3UTR	MIRT297012	1	1
hsa-let-7d-5p	NM_001165931	RRM2	AGAGGTAGTAGGTTGCATAGTT#AACTGTGTAGCTACCTCA#.((((((((....(((((((((#))))))))))))))))).	1526	1544	1.0	-21.4	1	0.007033856	0.588	0.9426172799999999	0.060711694999999996	-12.496539703358245	17	18	17	3UTR	MIRT297012	1	1
hsa-let-7d-5p	NM_001166393	MTUS1	AGAGGTAGTAGGTTGCATAGTT#ATGCAGCCTCCTCTG#(((((....(((((((((....#)))))))))))))).	1970	1985	1.0	-19.3	0	0.0001049797	0.603	0.47862197777777776	0.29673700625	-10.752244329692425	14	15	14	3UTR	MIRT472738	1	1
hsa-let-7d-5p	NM_001167741	MTX3	AGAGGTAGTAGGTTGCATAGTT#TGCAACCTCTACCTCC#.(((((((.((((((((.....#))))))))))))))).	3462	3478	1.0	-25.1	1	0.00175282	0.412	0.5619914500000001	0.16198845250000002	-4.849714495602881	15	16	15	3UTR	MIRT682445	0	0
hsa-let-7d-5p	NM_001171653	ZEB2	AGAGGTAGTAGGTTGCATAGTT#CTATTAAACGAGTCGCCTACTACCTA#..(((((((((((.((...(((#.)))..)).))))))))))).	9004	9030	1.0	-20.9	1	0.08459172	0.632	3.577583090909091	3.7716395	-5.813840636892696	16	21	11	3UTR	MIRT439136	0	0
hsa-let-7d-5p	NM_001172438	PEG10	AGAGGTAGTAGGTTGCATAGTT#CTGGCAACGTACACTGAATTCGTACCTCA#.(((((((((.(((((.(((..#)))))))).)))..........)))))).	2310	2339	1.0	-18.8	1	0.06134049	0.529	0.8018851789473684	0.7593490175	-6.618099312767468	17	29	8	3UTR	MIRT561776	1	1
hsa-let-7d-5p	NM_001174084	POLL	AGAGGTAGTAGGTTGCATAGTT#TGCCACCCCTTCTACCTCA#.(((((((..(((.(((.....#))).)))....))))))).	2432	2451	1.0	-18.1	1	0.6358596	0.441	0.2747612857142857	0.3923343974999999	-6.949060881451466	13	19	7	3UTR	MIRT735659	0	1
hsa-let-7d-5p	NM_001174126	SLC11A2	AGAGGTAGTAGGTTGCATAGTT#GTGATCTACCTGCCTCA#.(((((((((((((((......#))))))))).)))))).	3244	3261	1.0	-20.7	1	0.004126569	0.485	4.151007681875	4.398938873875001	-3.793324837357118	15	17	9	3UTR	MIRT004505	0	0
hsa-let-7d-5p	NM_001174127	SLC11A2	AGAGGTAGTAGGTTGCATAGTT#GTGATCTACCTGCCTCA#.(((((((((((((((......#))))))))).)))))).	3239	3256	1.0	-20.7	1	0.004126569	0.485	4.4351976818750005	4.629192673875	-3.793324837357118	15	17	9	3UTR	MIRT004505	0	0
hsa-let-7d-5p	NM_001184906	FBXL20	AGAGGTAGTAGGTTGCATAGTT#TGCAACCTCTGCCTCC#.(((((((.((((((((.....#))))))))))))))).	6636	6652	1.0	-25.1	1	0.0003000648	0.485	0.3325843475	0.07005509699999998	-4.849714495602881	15	16	15	3UTR	MIRT548266	0	0
hsa-let-7d-5p	NM_001184906	FBXL20	AGAGGTAGTAGGTTGCATAGTT#GCTGATTTGCAGCCTACACCA#...(((.((((((((((((((.#))))...))))))))))))).	4532	4553	1.0	-21.8	0	0.0001746274	0.618	-0.08079374705882351	-0.04666147000000001	-8.058226728550057	17	21	13	3UTR	MIRT548266	0	0
hsa-let-7d-5p	NM_001184906	FBXL20	AGAGGTAGTAGGTTGCATAGTT#ATGCTTCCTACTCTGGCCTCC#.(((((((((((..((((....#))))..))))))...))))).	9497	9518	1.0	-21.4	1	0.009151128	0.544	3.875944971428571	4.66117595375	-5.9392953675437665	15	21	6	3UTR	MIRT548266	0	0
hsa-let-7d-5p	NM_001184962	PEG10	AGAGGTAGTAGGTTGCATAGTT#CTGGCAACGTACACTGAATTCGTACCTCA#.(((((((((.(((((.(((..#)))))))).)))..........)))))).	2299	2328	1.0	-18.8	1	0.06134049	0.529	0.8018851789473684	0.7593490175	-6.618099312767468	17	29	8	3UTR	MIRT561776	1	1
hsa-let-7d-5p	NM_001186	BACH1	AGAGGTAGTAGGTTGCATAGTT#GTAACTACACTACCTCA#.((((((((.((((((......#))))))..)))))))).	4574	4591	1.0	-19.7	1	0.09406674	0.676	4.88553375	1.6362835874999995	-5.035831305685297	14	17	8	3UTR	MIRT084975	1	1
hsa-let-7d-5p	NM_004805	POLR2D	AGAGGTAGTAGGTTGCATAGTT#TGCAACCTCTGCCTTC#.(((((((.((((((((.....#))))))))))))))).	2396	2412	1.0	-23.2	1	0.002837169	0.441	0.7310397499999999	0.06964506875000004	-4.849714495602881	15	16	15	3UTR	MIRT032142	1	1
hsa-let-7d-5p	NM_005254	GABPB1	AGAGGTAGTAGGTTGCATAGTT#CTGTGCACCTAGAATCG#...(((..((((.(((((((..#)))))))))))..))).	4006	4023	1.0	-17.0	0	0.007280944	0.618	5.567162857142857	4.876667407499998	-11.660992270396932	14	17	11	3UTR	MIRT476549	0	0
hsa-let-7d-5p	NM_005373	MPL	AGAGGTAGTAGGTTGCATAGTT#TGCAACCTCTGCCTCC#.(((((((.((((((((.....#))))))))))))))).	2700	2716	1.0	-25.1	1	0.001999348	0.368	-0.117394625	-0.08780278749999999	-4.849714495602881	15	16	15	3UTR	MIRT006406	0	0
hsa-let-7d-5p	NM_005419	STAT2	AGAGGTAGTAGGTTGCATAGTT#TGCAGCCTCAACCTCC#.(((((.(.((((((((.....#))))))))).))))).	3470	3486	1.0	-20.5	0	0.0008882302	0.441	2.92647375	0.8471020762500001	-6.3934010304742	14	16	9	3UTR	MIRT681507	0	0
hsa-let-7d-5p	NM_005744	ARIH1	AGAGGTAGTAGGTTGCATAGTT#TGCAACCTCTGCCTCG#.(((((((.((((((((.....#))))))))))))))).	17800	17816	1.0	-25.5	1	0.00224359	0.441	0.04087725	-0.09225351250000005	-4.849714495602881	15	16	15	3UTR	MIRT559498	0	0
hsa-let-7d-5p	NM_005744	ARIH1	AGAGGTAGTAGGTTGCATAGTT#GTGCAATCTGCAACCTCC#.(((((.(((((((((((....#))))))))))).))))).	14580	14598	1.0	-24.3	0	0.0001156363	0.397	-0.2138310909090909	-0.025943112499999976	-5.337011372228436	16	18	11	3UTR	MIRT559498	0	0
hsa-let-7d-5p	NM_005831	CALCOCO2	AGAGGTAGTAGGTTGCATAGTT#GGCTGGCGTGCAATGGCGCAGTTGACTCACTACAGCCTCTGCCTCC#.(((((((.((((((..((((.#.))))))))))))))))).	2499	2545	1.0	-21.9	1	0.0006242216	0.441	0.006645657142857142	-0.26602815500000004	-5.082763575906494	17	19	17	3UTR	MIRT032106	0	0
hsa-let-7d-5p	NM_005920	MEF2D	AGAGGTAGTAGGTTGCATAGTT#TGCAGCCCTACCTCTG#((((((((..(((((((.....#))))))))))))))).	4259	4275	1.0	-22.9	1	0.002074813	0.382	2.2487969249999997	1.941287098875	-6.236470572775607	15	16	15	3UTR	MIRT735654	1	0
hsa-let-7d-5p	NM_006315	PCGF3	AGAGGTAGTAGGTTGCATAGTT#AGCTGTGTATGAATAAATATTACCTGTCTACCTCA#.(((((((((((((((((((((#)))))))))............))))).))))))).	2808	2843	1.0	-24.7	1	0.2094251	0.647	1.2742455929411765	0.18540865899999998	-3.793324837357118	21	35	9	3UTR	MIRT032156	1	1
hsa-let-7d-5p	NM_006465	ARID3B	AGAGGTAGTAGGTTGCATAGTT#AACCTCTACCTCTT#((((((((.(((((........#))))))))))))).	4207	4221	1.0	-18.3	1	0.02641961	0.674	0.0	0.0	-5.962462745001676	13	14	13	3UTR	MIRT073005	1	1
hsa-let-7d-5p	NM_006546	IGF2BP1	AGAGGTAGTAGGTTGCATAGTT#TGTGCGAAGTAAACTACCTCA#.((((((((...(((((((...#))))))).....)))))))).	3713	3734	1.0	-19.8	1	0.03130395	0.588	5.470498750000001	2.06577229375	-11.207409090692002	15	21	8	3UTR	MIRT032186	1	1
hsa-let-7d-5p	NM_012117	CBX5	AGAGGTAGTAGGTTGCATAGTT#CTATCAACTCCTGCTGCCTTTT#(((((((((((((((.((((..#)))))))..)))))))))))).	4073	4095	1.0	-20.7	1	0.07131175	0.676	0.7665497411764706	1.0121345124999996	-4.1706235265052785	19	22	12	3UTR	MIRT549022	1	1
hsa-let-7d-5p	NM_012199	AGO1	AGAGGTAGTAGGTTGCATAGTT#TGCTCCCTATTGCTTCTG#((((((((((((..(((.....#)))..)))))))))))).	4386	4404	1.0	-20.8	1	0.01461405	0.574	1.5701898333333333	1.6141406575000001	-6.083544976388314	15	18	12	3UTR	MIRT437855	1	1
hsa-let-7d-5p	NM_013274	POLL	AGAGGTAGTAGGTTGCATAGTT#TGCCACCCCTTCTACCTCA#.(((((((..(((.(((.....#))).)))....))))))).	2369	2388	1.0	-18.1	1	0.6358596	0.441	0.2747612857142857	0.3896632539999999	-6.949060881451466	13	19	7	3UTR	MIRT735659	0	1
hsa-let-7d-5p	NM_013410	AK4	AGAGGTAGTAGGTTGCATAGTT#ATGCCAACCTGACCTCG#.(((((..((((((((((....#)))).))))))))))).	3497	3514	1.0	-18.1	0	0.002584709	0.559	-0.5104545363636364	-0.0068073950000000355	-7.650646301409068	15	17	11	3UTR	MIRT508933	0	0
hsa-let-7d-5p	NM_013410	AK4	AGAGGTAGTAGGTTGCATAGTT#GCTGTCTTCTGGGAAGGATGATGAAATTTATTCCTGCTGCCTTA#.(((((((((((..........#.))))))))))).	2239	2283	1.0	-18.3	1	0.1253456	0.618	0.3800277818181818	0.69798238	-6.907794008098015	11	13	11	3UTR	MIRT508933	0	0
hsa-let-7d-5p	NM_001621	AHR	AGAGGTAGTAGGTTGCATAGTT#TGCAACCTCTACCTCC#.(((((((.((((((((.....#))))))))))))))).	4801	4817	1.0	-25.1	1	0.0003565984	0.456	0.0	0.0	-4.849714495602881	15	16	15	3UTR	MIRT482185	0	0
hsa-let-7d-5p	NM_001652	AQP6	AGAGGTAGTAGGTTGCATAGTT#TGCAACCTCTACCTCC#.(((((((.((((((((.....#))))))))))))))).	1715	1731	1.0	-25.1	1	0.00422406	0.412	0.0	0.0	-4.849714495602881	15	16	15	3UTR	MIRT761005	0	0
hsa-let-7d-5p	NM_001941	DSC3	AGAGGTAGTAGGTTGCATAGTT#TGCTCACTCCCTCACTCACCGATCAAAACCTGCTACCTCC#.(((((((((((((........#.))))))))))))).	5312	5352	1.0	-22.9	1	0.5004798	0.515	0.0	0.0	-4.761823477911366	13	15	13	3UTR	MIRT051723	0	0
hsa-let-7d-5p	NM_002022	FMO4	AGAGGTAGTAGGTTGCATAGTT#CCTGCTACCTCA#.(((((((((((..........#))))))))))).	2254	2266	1.0	-20.3	1	0.116952	0.647	0.0	0.0	-6.907794008098015	11	12	11	3UTR	MIRT617852	0	1
hsa-let-7d-5p	NM_002357	MXD1	AGAGGTAGTAGGTTGCATAGTT#TTGTGCGATGTTCTTGGGACCTCGCTGTGTTCTGCTATCTCG#.(((((((((((..(((((((.#.)))))))))))))))))).	1588	1630	1.0	-23.1	1	0.001200132	0.5	4.2713545272727265	4.9742698050000005	-5.9392953675437665	18	20	18	3UTR	MIRT303319	1	1
hsa-let-7d-5p	NM_002357	MXD1	AGAGGTAGTAGGTTGCATAGTT#GCGCCTGCACCTCG#.(((((.(((((.(((......#))))))))))))).	2482	2496	1.0	-19.7	0	0.000436871	0.412	0.0	0.0	-6.626141984894679	13	14	13	3UTR	MIRT303319	1	1
hsa-let-7d-5p	NM_002393	MDM4	AGAGGTAGTAGGTTGCATAGTT#TGCAACCTCTGCCTCC#.(((((((.((((((((.....#))))))))))))))).	4881	4897	1.0	-25.1	1	0.002907259	0.412	0.0	0.0	-4.849714495602881	15	16	15	3UTR	MIRT112241	1	1
hsa-let-7d-5p	NM_002393	MDM4	AGAGGTAGTAGGTTGCATAGTT#GCAACCTCTGCCTCC#.(((((((.(((((((......#)))))))))))))).	4329	4344	1.0	-24.6	1	0.002025972	0.397	0.0	0.0	-4.849714495602881	14	15	14	3UTR	MIRT112241	1	1
hsa-let-7d-5p	NM_002586	PBX2	AGAGGTAGTAGGTTGCATAGTT#GGCTTGCCCTGCTGGCCTCTC#((((((((((((..(((.((((#)))))))))))))).))))).	2647	2668	1.0	-20.5	1	0.0007836911	0.382	0.0	0.0	-6.083544976388314	19	21	14	3UTR	MIRT735656	1	1
hsa-let-7d-5p	NM_002906	RDX	AGAGGTAGTAGGTTGCATAGTT#GAGGGGACAACAATACTACCTCA#.(((((((((.((((.......#.))))..))))))))).	2922	2945	1.0	-18.7	1	0.002849269	0.544	0.0	0.0	-6.851148393071081	13	17	9	3UTR	MIRT521390	1	1
hsa-let-7d-5p	NM_003162	STRN	AGAGGTAGTAGGTTGCATAGTT#GCTGGCATCCAACTACTTCC#.((((((((.((.(((.((((.#))))))).)).)))))))).	9765	9785	1.0	-20.1	1	0.0009674864	0.603	0.0	0.0	-6.32496191835154	17	20	8	3UTR	MIRT500899	1	1
hsa-let-7d-5p	NM_003246	THBS1	AGAGGTAGTAGGTTGCATAGTT#TGCAACCTCTGCCTCC#.(((((((.((((((((.....#))))))))))))))).	7320	7336	1.0	-25.1	1	0.004866994	0.412	0.0	0.0	-4.849714495602881	15	16	15	3UTR	MIRT032122	1	1
hsa-let-7d-5p	NM_003373	VCL	AGAGGTAGTAGGTTGCATAGTT#TGCAACCTCTGCCTCC#.(((((((.((((((((.....#))))))))))))))).	5717	5733	1.0	-25.1	1	0.001904102	0.412	0.0	0.0	-4.849714495602881	15	16	15	3UTR	MIRT464266	0	0
hsa-let-7d-5p	NM_003406	YWHAZ	AGAGGTAGTAGGTTGCATAGTT#TGCAACCTTCTCCTCC#.((((.((.((((((((.....#)))))))).)))))).	3895	3911	1.0	-20.4	0	0.01421907	0.397	0.0	0.0	-6.750673256795928	14	16	8	3UTR	MIRT463663	0	0
hsa-let-7d-5p	NM_003417	ZNF264	AGAGGTAGTAGGTTGCATAGTT#GCTGTGATGCGATCTCGGCTCTCTGCAACCTCTGCCTCC#.(((((((.((((((((.((((#.))))...))))))))))))))).	6787	6826	1.0	-26.2	1	0.005534929	0.441	0.0	0.0	-4.849714495602881	19	24	15	3UTR	MIRT294445	0	0
hsa-let-7d-5p	NM_003417	ZNF264	AGAGGTAGTAGGTTGCATAGTT#GGCTCACAGCAGCCTCTGCCTCC#.(((((((.(((((((......#.)))))))))))))).	10436	10459	1.0	-24.4	1	0.000354816	0.368	0.0	0.0	-4.849714495602881	14	16	14	3UTR	MIRT294445	0	0
hsa-let-7d-5p	NM_003582	DYRK3	AGAGGTAGTAGGTTGCATAGTT#GGCTGGAGTGAAGTGGCGCAGTGTTGTCTGCAGCCTCAACCTCC#.(((((.(.((((((((.....#.))))))))).))))).	6035	6079	1.0	-20.7	0	8.523877e-05	0.426	0.0	0.0	-6.3934010304742	14	17	9	3UTR	MIRT735646	0	0
hsa-let-7d-5p	NM_003743	NCOA1	AGAGGTAGTAGGTTGCATAGTT#GCTACCTCTGCCTCC#.(((((((.((((.((......#)).))))))))))).	6582	6597	1.0	-20.4	1	0.005465146	0.471	0.0	0.0	-5.706554413123287	13	15	11	3UTR	MIRT051725	1	0
hsa-let-7d-5p	NM_004298	NUP155	AGAGGTAGTAGGTTGCATAGTT#TGCAACCTCTGCCTCA#.(((((((.((((((((.....#))))))))))))))).	5940	5956	1.0	-25.6	1	0.002457378	0.412	0.0	0.0	-4.849714495602881	15	16	15	3UTR	MIRT506360	1	0
hsa-let-7d-5p	NM_004423	DVL3	AGAGGTAGTAGGTTGCATAGTT#GGCTCTGCAGCCCCCTAACCTGCCTCTG#((((((((..(((((((.((((#)))).))))))).......)))))))).	2583	2611	1.0	-22.9	1	0.005548431	0.412	2.362479125	3.2467196382499997	-6.236470572775607	19	28	8	3UTR	MIRT523983	1	1
hsa-let-7d-5p	NM_004423	DVL3	AGAGGTAGTAGGTTGCATAGTT#ACTAACCATCCCCCTGCCTGCTGCCTCA#.((((((((((((.........#.)))))))))))).	2920	2948	1.0	-22.2	1	0.02096502	0.412	-0.207454495	0.060456046375000044	-5.618663395431772	12	14	12	3UTR	MIRT523983	1	1
hsa-let-7d-5p	NM_004438	EPHA4	AGAGGTAGTAGGTTGCATAGTT#TGTGCATTCTGAGACCTCTT#((((((..((((.((((((...#)))))).))))..)))))).	5822	5842	1.0	-19.6	0	0.008103012	0.559	0.0	0.0	-9.08402652291986	16	20	6	3UTR	MIRT548346	1	1
hsa-let-7d-5p	NM_004537	NAP1L1	AGAGGTAGTAGGTTGCATAGTT#AATTGAACAGCCTATGTCCTCA#.((((..((((((((.......#.))))))))..)))).	11301	11323	1.0	-19.8	0	0.002123114	0.603	0.0	0.0	-7.4710192137250955	12	16	8	3UTR	MIRT712372	1	1
hsa-let-7d-5p	NM_004612	TGFBR1	AGAGGTAGTAGGTTGCATAGTT#GGCTTTATCAGTGTAATCTCTGCCTTTT#((((((((.(((((((((....#.))))))))))))))))).	5680	5708	1.0	-20.4	1	0.02739827	0.691	0.0	0.0	-4.993964104447428	17	19	17	3UTR	MIRT032178	1	1
hsa-let-7d-5p	NM_004707	ATG12	AGAGGTAGTAGGTTGCATAGTT#TGCAACCTCTACCTCC#.(((((((.((((((((.....#))))))))))))))).	2181	2197	1.0	-25.1	1	0.001828149	0.471	3.2490312500000003	2.675269695	-4.849714495602881	15	16	15	3UTR	MIRT481389	0	0
hsa-let-7d-5p	NM_203331	CD59	AGAGGTAGTAGGTTGCATAGTT#GCCTGCTACTTCTT#(((((((((((((.........#))))))))))))).	3927	3941	1.0	-19.3	1	0.03835732	0.588	-0.3558265692307692	-0.23638190874999992	-5.762913004276319	13	14	13	3UTR	MIRT512747	0	1
hsa-let-7d-5p	NM_203390	RBM12B	AGAGGTAGTAGGTTGCATAGTT#GACTCCAGTTCATGCTTTTGCTGCCTCA#.(((((((((((..((((....#.)))).))))))))))).	4532	4560	1.0	-20.1	1	0.01605199	0.618	0.3960560727272728	0.32006465375000004	-5.9392953675437665	15	18	11	3UTR	MIRT543786	0	0
hsa-let-7d-5p	NM_203464	AK4	AGAGGTAGTAGGTTGCATAGTT#ATGCCAACCTGACCTCG#.(((((..((((((((((....#)))).))))))))))).	3536	3553	1.0	-18.1	0	0.002584709	0.559	-0.3219845090909091	-0.032721933750000015	-7.650646301409068	15	17	11	3UTR	MIRT508933	0	0
hsa-let-7d-5p	NM_203464	AK4	AGAGGTAGTAGGTTGCATAGTT#GCTGTCTTCTGGGAAGGATGATGAAATTTATTCCTGCTGCCTTA#.(((((((((((..........#.))))))))))).	2278	2322	1.0	-18.3	1	0.1253456	0.618	0.2836155181818182	0.6877944387499999	-6.907794008098015	11	13	11	3UTR	MIRT508933	0	0
hsa-let-7d-5p	NM_206866	BACH1	AGAGGTAGTAGGTTGCATAGTT#GTAACTACACTACCTCA#.((((((((.((((((......#))))))..)))))))).	4766	4783	1.0	-19.7	1	0.09406674	0.676	4.88553375	1.6362835874999995	-5.035831305685297	14	17	8	3UTR	MIRT084975	1	1
hsa-let-7d-5p	NM_207344	SPRYD4	AGAGGTAGTAGGTTGCATAGTT#GGCTACAGTGCAATGGCACAATCTCGGCTCAGTGCAACCTCTGCCTCC#.(((((((.(((((((((((((#.))))..)))))))))))))))).	5197	5245	1.0	-27.5	1	0.001347977	0.412	0.0	0.0	-4.849714495602881	20	24	16	3UTR	MIRT032172	1	1
hsa-let-7d-5p	NM_207344	SPRYD4	AGAGGTAGTAGGTTGCATAGTT#TGCAACCTCTGCCTCC#.(((((((.((((((((.....#))))))))))))))).	4026	4042	1.0	-25.1	1	0.00287941	0.368	0.0	0.0	-4.849714495602881	15	16	15	3UTR	MIRT032172	1	1
hsa-let-7d-5p	XM_005245551	PPP1R15B	AGAGGTAGTAGGTTGCATAGTT#GGCTTAAGTGTTCCTCCTGCCTCC#.(((((((.(((..((((....#.)))).))).))))))).	5037	5061	1.0	-18.8	1	0.0510422	0.5	0.0	0.0	-6.9956850257895296	14	18	7	3UTR	MIRT470424	1	1
hsa-let-7d-5p	XM_005249996	RAB19	AGAGGTAGTAGGTTGCATAGTT#TGCAACCTCTACCTCC#.(((((((.((((((((.....#))))))))))))))).	1587	1603	1.0	-25.1	1	0.01604808	0.456	0.0	0.0	-4.849714495602881	15	16	15	3UTR	MIRT681739	0	0
hsa-let-7d-5p	XM_005251061	YWHAZ	AGAGGTAGTAGGTTGCATAGTT#TGCAACCTTCTCCTCC#.((((.((.((((((((.....#)))))))).)))))).	4300	4316	1.0	-20.4	0	0.01421907	0.397	0.0	0.0	-6.750673256795928	14	16	8	3UTR	MIRT463663	0	0
hsa-let-7d-5p	XM_005251063	YWHAZ	AGAGGTAGTAGGTTGCATAGTT#TGCAACCTTCTCCTCC#.((((.((.((((((((.....#)))))))).)))))).	4346	4362	1.0	-20.4	0	0.01421907	0.397	0.0	0.0	-6.750673256795928	14	16	8	3UTR	MIRT463663	0	0
hsa-let-7d-5p	XM_005258317	KIAA1328	AGAGGTAGTAGGTTGCATAGTT#GCAGCCTGCATGCAGCG#.(..((((((((((((......#))))))))).)))..).	3568	3585	1.0	-19.0	0	2.415065e-05	0.456	0.0	0.0	-8.382886586622757	13	17	9	3UTR	MIRT702485	0	0
hsa-let-7d-5p	XM_005258318	KIAA1328	AGAGGTAGTAGGTTGCATAGTT#GCAGCCTGCATGCAGCG#.(..((((((((((((......#))))))))).)))..).	3517	3534	1.0	-19.0	0	2.415065e-05	0.456	0.0	0.0	-8.382886586622757	13	17	9	3UTR	MIRT702485	0	0
hsa-let-7d-5p	XM_005264519	STRN	AGAGGTAGTAGGTTGCATAGTT#GCTGGCATCCAACTACTTCC#.((((((((.((.(((.((((.#))))))).)).)))))))).	9654	9674	1.0	-20.1	1	0.0009674864	0.603	0.0	0.0	-6.32496191835154	17	20	8	3UTR	MIRT500899	1	1
hsa-let-7d-5p	XM_005267047	ECHDC1	AGAGGTAGTAGGTTGCATAGTT#ACTGTGTCAACCCAATACTATTTG#..(((((((((((((((((((.#)))))).)))))...)))))))).	2304	2328	1.0	-18.8	1	0.008106364	0.676	0.0	0.0	-4.95700071937229	19	24	8	3UTR	MIRT549848	0	1
hsa-let-7d-5p	XM_006710670	PAFAH2	AGAGGTAGTAGGTTGCATAGTT#CTGTGTTCGCTTACTACTTG#..(((((((((((.((((((..#))))))..))))))))))).	2833	2853	1.0	-20.3	1	0.02886109	0.588	0.0	0.0	-5.813840636892696	17	20	11	3UTR	MIRT713521	0	0
hsa-let-7d-5p	XM_006711334	MEF2D	AGAGGTAGTAGGTTGCATAGTT#TGCAGCCCTACCTCTG#((((((((..(((((((.....#))))))))))))))).	4235	4251	1.0	-22.9	1	0.002074813	0.382	0.0	0.0	-6.236470572775607	15	16	15	3UTR	MIRT735654	1	0
hsa-let-7d-5p	XM_006717777	POLL	AGAGGTAGTAGGTTGCATAGTT#TGCCACCCCTTCTACCTCA#.(((((((..(((.(((.....#))).)))....))))))).	2071	2090	1.0	-18.1	1	0.6358596	0.441	0.0	0.0	-6.949060881451466	13	19	7	3UTR	MIRT735659	0	1
hsa-let-7d-5p	XM_006723403	OPA3	AGAGGTAGTAGGTTGCATAGTT#TGCAACTTCTACCTCC#.(((((((.((((((((.....#))))))))))))))).	4132	4148	1.0	-22.4	1	0.1146813	0.441	0.0	0.0	-4.849714495602881	15	16	15	3UTR	MIRT461093	0	1
hsa-let-7d-5p	XM_011517029	RBM12B	AGAGGTAGTAGGTTGCATAGTT#GATTCTTGATCCATATATCACCTGTTAAGTAGTGACCTTGCTGCCTCTG#((((((((((((((((.((.((#.)).))))))))).))))))))).	6278	6327	1.0	-23.3	1	0.0004814681	0.632	0.0	0.0	-3.937574446201665	20	24	9	3UTR	MIRT543786	0	0
hsa-let-7d-5p	XM_011517029	RBM12B	AGAGGTAGTAGGTTGCATAGTT#GACTCCAGTTCATGCTTTTGCTGCCTCA#.(((((((((((..((((....#.)))).))))))))))).	4483	4511	1.0	-20.1	1	0.01605199	0.618	0.0	0.0	-5.9392953675437665	15	18	11	3UTR	MIRT543786	0	0
hsa-let-7d-5p	XM_011518949	TGFBR1	AGAGGTAGTAGGTTGCATAGTT#GGCTTTATCAGTGTAATCTCTGCCTTTT#((((((((.(((((((((....#.))))))))))))))))).	5559	5587	1.0	-20.4	1	0.02739827	0.691	0.0	0.0	-4.993964104447428	17	19	17	3UTR	MIRT032178	1	1
hsa-let-7d-5p	XM_011529018	STK4	AGAGGTAGTAGGTTGCATAGTT#GGCTCACTGCAACCTCCGCCTCC#.(((((.(.((((((((.((((#))))...))))))))).))))).	7970	7993	1.0	-21.6	0	0.002619592	0.441	0.0	0.0	-6.3934010304742	18	23	9	3UTR	MIRT118585	0	0
hsa-let-7d-5p	XM_011539651	POLL	AGAGGTAGTAGGTTGCATAGTT#TGCCACCCCTTCTACCTCA#.(((((((..(((.(((.....#))).)))....))))))).	2063	2082	1.0	-18.1	1	0.6358596	0.441	0.0	0.0	-6.949060881451466	13	19	7	3UTR	MIRT735659	0	1
hsa-let-7d-5p	XM_011539654	POLL	AGAGGTAGTAGGTTGCATAGTT#TGCCACCCCTTCTACCTCA#.(((((((..(((.(((.....#))).)))....))))))).	1808	1827	1.0	-18.1	1	0.6358596	0.441	0.0	0.0	-6.949060881451466	13	19	7	3UTR	MIRT735659	0	1
hsa-let-7d-5p	XM_017002491	ZNF644	AGAGGTAGTAGGTTGCATAGTT#ACTCCAGTTGCATTTCTCAGACAATAAAGTGGTGCATCCATGCTACCTCC#.(((((((((((.(((((....#.))))).)).))))))))).	4886	4936	1.0	-24.2	1	0.01579386	0.603	0.0	0.0	-5.08245545002336	16	20	9	3UTR	MIRT032169	1	1
hsa-let-7d-5p	XM_017013408	RBM12B	AGAGGTAGTAGGTTGCATAGTT#GATTCTTGATCCATATATCACCTGTTAAGTAGTGACCTTGCTGCCTCTG#((((((((((((((((.((.((#.)).))))))))).))))))))).	6345	6394	1.0	-23.3	1	0.0004814681	0.632	0.0	0.0	-3.937574446201665	20	24	9	3UTR	MIRT543786	0	0
hsa-let-7d-5p	XM_017013408	RBM12B	AGAGGTAGTAGGTTGCATAGTT#GACTCCAGTTCATGCTTTTGCTGCCTCA#.(((((((((((..((((....#.)))).))))))))))).	4550	4578	1.0	-20.1	1	0.01605199	0.618	0.0	0.0	-5.9392953675437665	15	18	11	3UTR	MIRT543786	0	0
hsa-let-7d-5p	NM_001042559	EIF4G2	AGAGGTAGTAGGTTGCATAGTT#AGTATATTGCCTGTATTTCTACCTCTA#(((((((((((((.........#.))))).....)))))))).	3378	3405	1.0	-16.0	1	0.0134286	0.662	7.981021666666665	5.494194874999999	-5.762913004276319	13	20	8	3UTR	MIRT032105	1	1
hsa-let-7d-5p	NM_001048183	PHACTR4	AGAGGTAGTAGGTTGCATAGTT#GCTGGAGTGCAGTGGCACAATCTTGGCTCAGAGCAACCTCTGCCTCC#.(((((((.(((((((......#.)))))))))))))).	5208	5255	1.0	-24.4	1	0.0001477664	0.426	-0.10206900000000003	-0.21489847499999998	-4.849714495602881	14	16	14	3UTR	MIRT682385	0	0
hsa-let-7d-5p	NM_001048183	PHACTR4	AGAGGTAGTAGGTTGCATAGTT#AGCTCACTGCAACCTCCGCCTCC#.(((((.(.((((((((.((((#))))...))))))))).))))).	4888	4911	1.0	-21.7	0	0.0130708	0.397	-0.74840975	-0.129465975	-6.3934010304742	18	23	9	3UTR	MIRT682385	0	0
hsa-let-7d-5p	NM_001077199	SREK1	AGAGGTAGTAGGTTGCATAGTT#CAATCTGTCTGCCTCA#.((((((((((((((.......#))))))).))))))).	5888	5904	1.0	-18.9	1	0.0011266	0.515	-0.29724266666666666	-0.030313356249999986	-4.026373917660731	14	16	7	3UTR	MIRT032150	1	0
hsa-let-7d-5p	NM_001077619	UBXN2B	AGAGGTAGTAGGTTGCATAGTT#GCTCACCGCAACCTCCGCCTCC#.(((((.(.(((((((......#.)))))))).))))).	1713	1735	1.0	-20.1	0	0.009535675	0.471	0.01759673714285716	0.043171142499999954	-6.3934010304742	13	16	8	3UTR	MIRT240329	0	0
hsa-let-7d-5p	NM_001099694	ZNF578	AGAGGTAGTAGGTTGCATAGTT#GGCTGTGGTACCTACTACTTA#..(((((((((((..(((((((#)))))))..))))))))))).	4292	4313	1.0	-24.1	1	0.00204626	0.632	-0.41099250000000004	-0.11184928499999994	-6.549290197143331	18	21	11	3UTR	MIRT680801	0	0
hsa-let-7d-5p	NM_001100	ACTA1	AGAGGTAGTAGGTTGCATAGTT#GTGTTTATAACGTGTACATACATTAACTTATTACCTCA#.((((((((((((((.......#.)))))))))))))).	1368	1406	1.0	-19.0	1	0.4357002	0.706	5.101129714285714	3.0710798937500003	-4.026373917660731	14	16	14	3UTR	MIRT550899	0	1
hsa-let-7d-5p	NM_001116	ADCY9	AGAGGTAGTAGGTTGCATAGTT#CTGGAAACCCCGCTGCCTCTG#(((((((((.((((...(((..#)))..))))..))))))))).	5054	5075	1.0	-19.4	1	0.008269453	0.382	2.669756111111111	4.187659675	-6.148579555084091	16	21	9	3UTR	MIRT032153	1	0
hsa-let-7d-5p	NM_001122770	ZBTB37	AGAGGTAGTAGGTTGCATAGTT#GACTCAAGCAATCCTCCTACCTCA#.(((((((.(((((((..((((#))))...)))).))).))))))).	10833	10857	1.0	-21.6	1	0.3321701	0.441	0.0	0.0	-4.849714495602881	18	24	7	3UTR	MIRT574364	1	0
hsa-let-7d-5p	NM_001122770	ZBTB37	AGAGGTAGTAGGTTGCATAGTT#AGCTGTGTGGCCTTCCTACTGATA#(..(((((.(((((((((((((#)))))))))))))..)))))..).	11605	11629	1.0	-21.2	0	0.006697692	0.574	0.0	0.0	-7.715179460769049	19	24	13	3UTR	MIRT574364	1	0
hsa-let-7d-5p	NM_001127223	CD59	AGAGGTAGTAGGTTGCATAGTT#GCCTGCTACTTCTT#(((((((((((((.........#))))))))))))).	4104	4118	1.0	-19.3	1	0.03835732	0.588	-0.2665834	-0.15420487875	-5.762913004276319	13	14	13	3UTR	MIRT512747	0	1
hsa-let-7d-5p	NM_001127225	CD59	AGAGGTAGTAGGTTGCATAGTT#GCCTGCTACTTCTT#(((((((((((((.........#))))))))))))).	3997	4011	1.0	-19.3	1	0.03835732	0.588	0.1895429461538462	-0.05806269250000002	-5.762913004276319	13	14	13	3UTR	MIRT512747	0	1
hsa-let-7d-5p	NM_001127321	CBX5	AGAGGTAGTAGGTTGCATAGTT#TGCAACCTCCGCCTCC#.(((((.(.((((((((.....#))))))))).))))).	8330	8346	1.0	-20.8	0	0.0002587734	0.382	-0.19288354999999996	0.163927125	-6.3934010304742	14	16	9	3UTR	MIRT549022	1	1
hsa-let-7d-5p	NM_001127321	CBX5	AGAGGTAGTAGGTTGCATAGTT#CTATCAACTCCTGCTGCCTTTT#(((((((((((((((.((((..#)))))))..)))))))))))).	4036	4058	1.0	-20.7	1	0.07131175	0.676	1.9024834764705882	0.61209148	-4.1706235265052785	19	22	12	3UTR	MIRT549022	1	1
hsa-let-7d-5p	NM_001127322	CBX5	AGAGGTAGTAGGTTGCATAGTT#TGCAACCTCCGCCTCC#.(((((.(.((((((((.....#))))))))).))))).	8528	8544	1.0	-20.8	0	0.0002587734	0.382	0.31572825	0.00948979249999999	-6.3934010304742	14	16	9	3UTR	MIRT549022	1	1
hsa-let-7d-5p	NM_001127457	CRY2	AGAGGTAGTAGGTTGCATAGTT#AGCTGAGACCTGTTCCTGCAAGCCAGCTGCCTTG#.((((((((.(((((((.....#.))))).)).)))))))).	2015	2049	1.0	-19.0	1	7.311591e-05	0.471	-0.04812601249999998	0.17261487125000002	-5.035831305685297	15	19	8	3UTR	MIRT180602	1	1
hsa-let-7d-5p	NM_001127457	CRY2	AGAGGTAGTAGGTTGCATAGTT#GTGGCCTGTGCCTCC#.((((((.((((((((......#)))))))))))))).	2950	2965	1.0	-19.1	1	8.449731e-05	0.412	0.261100625	0.47452674749999996	-6.106959766537749	14	15	14	3UTR	MIRT180602	1	1
hsa-let-7d-5p	NM_001127691	RHD	AGAGGTAGTAGGTTGCATAGTT#TGCAACCTCTACCTCC#.(((((((.((((((((.....#))))))))))))))).	1401	1417	1.0	-25.1	1	0.02089599	0.441	0.07222562499999999	0.02347752499999998	-4.849714495602881	15	16	15	3UTR	MIRT453402	0	0
hsa-let-7d-5p	NM_001130674	CALU	AGAGGTAGTAGGTTGCATAGTT#ACAATGCAAACCACTTACTACCA#...(((((((((((((((.((.#)).)))))....)))))))))).	2267	2290	1.0	-19.4	0	0.09680584	0.515	2.0860211578947365	1.4243667304999998	-6.514540193678739	17	23	10	3UTR	MIRT123316	1	1
hsa-let-7d-5p	NM_001130916	TGFBR1	AGAGGTAGTAGGTTGCATAGTT#GGCTTTATCAGTGTAATCTCTGCCTTTT#((((((((.(((((((((....#.))))))))))))))))).	5449	5477	1.0	-20.4	1	0.02739827	0.691	1.7633007888888885	1.9539047875000004	-4.993964104447428	17	19	17	3UTR	MIRT032178	1	1
hsa-let-7d-5p	NM_001130963	NEMP1	AGAGGTAGTAGGTTGCATAGTT#AACTGTCCTAAGTGACAACTACCTCA#.((((((((..(((((.(((..#.))).))))).)))))))).	3071	3097	1.0	-20.0	1	0.001346733	0.588	-0.15781475000000003	0.07251739875000003	-7.8606057810956464	16	20	8	3UTR	MIRT032144	1	1
hsa-let-7d-5p	NM_001135699	YWHAZ	AGAGGTAGTAGGTTGCATAGTT#TGCAACCTTCTCCTCC#.((((.((.((((((((.....#)))))))).)))))).	3927	3943	1.0	-20.4	0	0.01421907	0.397	0.0	0.0	-6.750673256795928	14	16	8	3UTR	MIRT463663	0	0
hsa-let-7d-5p	NM_001139510	ECHDC1	AGAGGTAGTAGGTTGCATAGTT#ACTGTGTCAACCCAATACTATTTG#..(((((((((((((((((((.#)))))).)))))...)))))))).	2044	2068	1.0	-18.8	1	0.008106364	0.676	1.854469652173913	0.3147485749999998	-4.95700071937229	19	24	8	3UTR	MIRT549848	0	1
hsa-let-7d-5p	NM_032116	KATNAL1	AGAGGTAGTAGGTTGCATAGTT#TGCAACCTCTGCCTCC#.(((((((.((((((((.....#))))))))))))))).	2539	2555	1.0	-25.1	1	0.003242585	0.485	-0.7346797	0.11814176550000004	-4.849714495602881	15	16	15	3UTR	MIRT032145	1	1
hsa-let-7d-5p	NM_032116	KATNAL1	AGAGGTAGTAGGTTGCATAGTT#GGCTCACTGCAACTTCTGCCTCC#.(((((((.((((((((.((((#))))...))))))))))))))).	4018	4041	1.0	-23.2	1	0.008464401	0.397	0.6267008749999999	0.09013223874999998	-4.849714495602881	19	23	15	3UTR	MIRT032145	1	1
hsa-let-7d-5p	NM_032186	ZNF644	AGAGGTAGTAGGTTGCATAGTT#ACTCCAGTTGCATTTCTCAGACAATAAAGTGGTGCATCCATGCTACCTCC#.(((((((((((.(((((....#.))))).)).))))))))).	1077	1127	1.0	-24.2	1	0.01579386	0.603	3.8311333333333337	3.19386457525	-5.08245545002336	16	20	9	3UTR	MIRT032169	1	1
hsa-let-7d-5p	NM_032522	ZBTB37	AGAGGTAGTAGGTTGCATAGTT#TGCAATCTCTGCCTCC#.(((((((.((((((((.....#))))))))))))))).	3106	3122	1.0	-22.5	1	0.001013711	0.412	-0.22142049999999996	-0.0011917499999999914	-4.849714495602881	15	16	15	3UTR	MIRT574364	1	0
hsa-let-7d-5p	NM_032828	ZNF587	AGAGGTAGTAGGTTGCATAGTT#TGCAACCTCTGCCTCC#.(((((((.((((((((.....#))))))))))))))).	2701	2717	1.0	-25.1	1	0.01256908	0.471	0.28338304999999997	-0.03901471287499998	-4.849714495602881	15	16	15	3UTR	MIRT457678	0	1
hsa-let-7d-5p	NM_032828	ZNF587	AGAGGTAGTAGGTTGCATAGTT#AGCTCATTGCAACCTCTGCTTCC#.(((((((.((((((((.((((#))))...))))))))))))))).	3167	3190	1.0	-23.3	1	0.01705784	0.412	0.07829850000000001	-0.01179768750000007	-4.849714495602881	19	23	15	3UTR	MIRT457678	0	1
hsa-let-7d-5p	NM_032837	FAM104A	AGAGGTAGTAGGTTGCATAGTT#TGCACTGAAATTAACTGCCATACTACCTCTC#(((((((((((((((((.....#))))............))).)))))))))).	1118	1149	1.0	-20.2	1	0.007533173	0.632	0.60869389	1.8553879500000006	-3.937574446201665	17	31	10	3UTR	MIRT032171	1	1
hsa-let-7d-5p	NM_032875	FBXL20	AGAGGTAGTAGGTTGCATAGTT#TGCAACCTCTGCCTCC#.(((((((.((((((((.....#))))))))))))))).	6732	6748	1.0	-25.1	1	0.0003000648	0.485	-0.2819872875	0.08875930450000002	-4.849714495602881	15	16	15	3UTR	MIRT548266	0	0
hsa-let-7d-5p	NM_032875	FBXL20	AGAGGTAGTAGGTTGCATAGTT#ATGCTTCCTACTCTGGCCTCC#.(((((((((((..((((....#))))..))))))...))))).	9593	9614	1.0	-21.4	1	0.009151128	0.544	4.053038714285714	5.221207319999999	-5.9392953675437665	15	21	6	3UTR	MIRT548266	0	0
hsa-let-7d-5p	NM_032875	FBXL20	AGAGGTAGTAGGTTGCATAGTT#GGCATGCACCACTACTGCCTG#..((((((((((.(((((.(((#)))))))).).))))))))).	3135	3156	1.0	-21.0	1	0.001227333	0.559	-0.09354990909090914	0.16376520599999994	-6.246131332038532	18	21	9	3UTR	MIRT548266	0	0
hsa-let-7d-5p	NM_033089	ZCCHC3	AGAGGTAGTAGGTTGCATAGTT#AGCCCGGTGCTCATTCCACTACCTCTC#(((((((((.((..((((....#.)))).....))))))))))).	2083	2110	1.0	-19.6	1	0.1564404	0.471	1.8732588888888886	1.4426254537500003	-7.326051444716493	15	22	11	3UTR	MIRT083299	0	0
hsa-let-7d-5p	NM_058241	CCNT2	AGAGGTAGTAGGTTGCATAGTT#GCTGTTGCTGCCACTGCTTCA#.((((((((.(((.(((((((.#))))).)).))))))))))).	2317	2338	1.0	-21.6	1	0.0001130102	0.559	1.414454625	3.47754809875	-5.892671223205703	18	21	11	3UTR	MIRT548972	1	1
hsa-let-7d-5p	NM_080626	BRI3BP	AGAGGTAGTAGGTTGCATAGTT#CTGTGATCACTGCTACTTCTT#(((((((((((....(((((..#)))))....))))))))))).	5586	5607	1.0	-20.6	1	0.01140522	0.603	-0.9140102818181819	-0.322774805	-10.165797846235305	16	21	11	3UTR	MIRT681360	0	0
hsa-let-7d-5p	NM_080660	ZC3HAV1L	AGAGGTAGTAGGTTGCATAGTT#GGCTCAAGCGATCTGCCTGCTTCA#.(((((((((((((((......#.))))))))).)))))).	1550	1574	1.0	-20.4	1	0.001335575	0.456	0.3017761625	0.14385415249999997	-3.793324837357118	15	18	9	3UTR	MIRT463418	1	0
hsa-let-7d-5p	NM_080764	ZNF280B	AGAGGTAGTAGGTTGCATAGTT#ATGCCCTTCCCCTAGGCCTGCATGGCTTGCTACCTCA#.((((((((((((((((.....#.))))..)))))))))))).	4744	4781	1.0	-23.6	1	0.01079901	0.515	0.9308991000000001	0.8419360312499999	-3.793324837357118	16	20	12	3UTR	MIRT032184	0	1
hsa-let-7d-5p	NM_130386	COLEC12	AGAGGTAGTAGGTTGCATAGTT#TGCAATCTCTGCCTCC#.(((((((.((((((((.....#))))))))))))))).	5293	5309	1.0	-22.5	1	0.008593881	0.338	3.2311190999999995	3.7664991450000005	-4.849714495602881	15	16	15	3UTR	MIRT548780	0	0
hsa-let-7d-5p	NM_138619	GGA3	AGAGGTAGTAGGTTGCATAGTT#GCTGTGATAACCTCTCCTTTG#(((((.((.((((((((((((.#)))))).))))))))))))).	2347	2368	1.0	-19.6	0	0.01513173	0.529	0.45679607692307694	1.1277824724999999	-6.894922865640474	19	21	13	3UTR	MIRT499494	0	1
hsa-let-7d-5p	NM_138962	MSI2	AGAGGTAGTAGGTTGCATAGTT#AACTGTATTAGTGTTGTACCAGCCTATTAACCTCTT#(((((((((((((((.......#.)))))))))).))))).	2261	2297	1.0	-19.7	1	0.03228841	0.588	2.2713442937499995	1.9986076174999998	-4.1706235265052785	15	18	10	3UTR	MIRT547372	1	1
hsa-let-7d-5p	NM_139168	SREK1	AGAGGTAGTAGGTTGCATAGTT#CAATCTGTCTGCCTCA#.((((((((((((((.......#))))))).))))))).	6123	6139	1.0	-18.9	1	0.0011266	0.515	-0.29724266666666666	-0.030313356249999986	-4.026373917660731	14	16	7	3UTR	MIRT032150	1	0
hsa-let-7d-5p	NM_144775	SMCR8	AGAGGTAGTAGGTTGCATAGTT#CTTTGCAACCACTTCACTACCTCTC#(((((((((.(((((((.((..#)).))))))).....))))))))).	4306	4331	1.0	-23.3	1	0.09483626	0.456	1.9170095555555555	-0.3568887674999999	-5.180080914529843	18	25	9	3UTR	MIRT076222	1	1
hsa-let-7d-5p	NM_145168	SDR42E1	AGAGGTAGTAGGTTGCATAGTT#AGCCACCCAGCACTGCTACCTCA#.((((((((((((((.......#.)))).)))))))))).	5162	5185	1.0	-21.8	1	0.038442	0.382	-0.27783730666666673	-0.24786607500000002	-4.026373917660731	14	17	10	3UTR	MIRT499654	0	1
hsa-let-7d-5p	NM_147223	NCOA1	AGAGGTAGTAGGTTGCATAGTT#GCTACCTCTGCCTCC#.(((((((.((((.((......#)).))))))))))).	6503	6518	1.0	-20.4	1	0.005465146	0.471	2.137982714285714	1.0610606150000004	-5.706554413123287	13	15	11	3UTR	MIRT051725	1	0
hsa-let-7d-5p	NM_147233	NCOA1	AGAGGTAGTAGGTTGCATAGTT#GCTACCTCTGCCTCC#.(((((((.((((.((......#)).))))))))))).	6093	6108	1.0	-20.4	1	0.005465146	0.471	2.137982714285714	1.0610606150000004	-5.706554413123287	13	15	11	3UTR	MIRT051725	1	0
hsa-let-7d-5p	NM_152420	CARNMT1	AGAGGTAGTAGGTTGCATAGTT#GCGATCTTCCTGCCTTA#.(((((((.(((((((......#)))))))..))))))).	1885	1902	1.0	-19.3	1	0.00505005	0.485	0.8552654285714285	0.9736073974999999	-4.849714495602881	14	17	7	3UTR	MIRT032163	1	1
hsa-let-7d-5p	NM_001303058	TMED4	AGAGGTAGTAGGTTGCATAGTT#TGCAACCTCCGCCTCC#.(((((.(.((((((((.....#))))))))).))))).	762	778	1.0	-20.8	0	0.002912886	0.412	-0.13510668750000002	-0.023583322249999997	-6.3934010304742	14	16	9	3UTR	MIRT032125	0	0
hsa-let-7d-5p	NM_001303060	TMED4	AGAGGTAGTAGGTTGCATAGTT#TGCAACCTCCGCCTCC#.(((((.(.((((((((.....#))))))))).))))).	985	1001	1.0	-20.8	0	0.002912886	0.412	0.0	0.0	-6.3934010304742	14	16	9	3UTR	MIRT032125	0	0
hsa-let-7d-5p	NM_001303264	TSC22D2	AGAGGTAGTAGGTTGCATAGTT#TGCAACCTCCGCCTCC#.(((((.(.((((((((.....#))))))))).))))).	7397	7413	1.0	-20.8	0	0.0002805466	0.382	0.0	0.0	-6.3934010304742	14	16	9	3UTR	MIRT465125	1	1
hsa-let-7d-5p	NM_001306158	RABL2A	AGAGGTAGTAGGTTGCATAGTT#GGCTGGAGTGCAGTGGCGCAGTCTCGGCTCGCTGCAACCTCTGACTCCCTGGTTCAAACGATTCTCCTGCCTCA#.(((((((.((((((((.((((#.))))...))))))))..........................))))))).	1433	1507	1.0	-20.8	1	0.03638202	0.397	0.0	0.0	-4.849714495602881	19	50	8	3UTR	MIRT454540	0	0
hsa-let-7d-5p	NM_001306210	TGFBR1	AGAGGTAGTAGGTTGCATAGTT#GGCTTTATCAGTGTAATCTCTGCCTTTT#((((((((.(((((((((....#.))))))))))))))))).	5692	5720	1.0	-20.4	1	0.02739827	0.691	1.7633007888888885	1.9539047875000004	-4.993964104447428	17	19	17	3UTR	MIRT032178	1	1
hsa-let-7d-5p	NM_001307939	ARID3B	AGAGGTAGTAGGTTGCATAGTT#AACCTCTACCTCTT#((((((((.(((((........#))))))))))))).	4210	4224	1.0	-18.3	1	0.02641961	0.674	4.038715000000001	3.5895973462499997	-5.962462745001676	13	14	13	3UTR	MIRT073005	1	1
hsa-let-7d-5p	NM_001308045	SENP5	AGAGGTAGTAGGTTGCATAGTT#CTCTGCTTTGCAGTTTACTGCTTCC#.((((((((((((((((.(((.#.))).)))))))))))))))).	5700	5725	1.0	-22.2	1	0.0002663046	0.456	0.62963781875	0.58850533875	-3.793324837357118	19	22	16	3UTR	MIRT051719	1	1
hsa-let-7d-5p	NM_001308045	SENP5	AGAGGTAGTAGGTTGCATAGTT#TGCAACCCCTGCCTCC#.(((((((..(((((((.....#))))))).))))))).	5068	5084	1.0	-21.9	1	0.002463114	0.426	-0.12737062857142858	0.30795745625	-6.09222096393106	14	16	7	3UTR	MIRT051719	1	1
hsa-let-7d-5p	NM_001317077	CHTOP	AGAGGTAGTAGGTTGCATAGTT#GGCTGTGGACTTACTTGCCA#...(((((((((((.(((((((#))))))))))))))).))).	1015	1035	1.0	-19.0	0	0.0001522929	0.544	1.4062049166666661	1.712353759375	-7.249989753929374	18	20	15	3UTR	MIRT266625	0	0
hsa-let-7d-5p	NM_001317122	AGO1	AGAGGTAGTAGGTTGCATAGTT#TGCTCCCTATTGCTTCTG#((((((((((((..(((.....#)))..)))))))))))).	4386	4404	1.0	-20.8	1	0.01461405	0.574	0.0	0.0	-6.083544976388314	15	18	12	3UTR	MIRT437855	1	1
hsa-let-7d-5p	NM_001317123	AGO1	AGAGGTAGTAGGTTGCATAGTT#TGCTCCCTATTGCTTCTG#((((((((((((..(((.....#)))..)))))))))))).	4291	4309	1.0	-20.8	1	0.01461405	0.574	2.65658625	1.3416398837499999	-6.083544976388314	15	18	12	3UTR	MIRT437855	1	1
hsa-let-7d-5p	NM_001319960	EDEM3	AGAGGTAGTAGGTTGCATAGTT#ACTGTGCATATCCTCATACTTTTA#(((((((..(((.((((((((.#))))))))...)))..))))))).	6648	6672	1.0	-18.7	1	0.05550043	0.691	0.6798498749999999	2.0119431637500003	-8.596729646294301	18	24	8	3UTR	MIRT704030	1	1
hsa-let-7d-5p	NM_001322250	MSI2	AGAGGTAGTAGGTTGCATAGTT#AACTGTATTAGTGTTGTACCAGCCTATTAACCTCTT#(((((((((((((((.......#.)))))))))).))))).	2164	2200	1.0	-19.7	1	0.03228841	0.588	2.2713442937499995	1.9986076174999998	-4.1706235265052785	15	18	10	3UTR	MIRT547372	1	1
hsa-let-7d-5p	NM_001322814	SOD2	AGAGGTAGTAGGTTGCATAGTT#ATGAACCTGGTACCTCA#.((((((.((((((.(((....#))))))))).)))))).	12403	12420	1.0	-20.9	1	0.003121794	0.5	0.2553958333333333	0.10799688750000003	-6.842409326788384	15	17	9	3UTR	MIRT525728	0	0
hsa-let-7d-5p	NM_001322815	SOD2	AGAGGTAGTAGGTTGCATAGTT#ATGAACCTGGTACCTCA#.((((((.((((((.(((....#))))))))).)))))).	12340	12357	1.0	-20.9	1	0.003121794	0.5	0.08577683333333332	0.011822812500000023	-6.842409326788384	15	17	9	3UTR	MIRT525728	0	0
hsa-let-7d-5p	NM_001330193	RRM1	AGAGGTAGTAGGTTGCATAGTT#GACTTGGAAGAGACCAGCATGTCTTCAGTAGCCAAACTACTTCTT#(((((((((.((((((......#.))))))..))))))))).	2017	2062	1.0	-18.9	1	0.01035001	0.574	1.028048111111111	2.732630459	-5.180080914529843	15	19	9	3UTR	MIRT459737	0	0
hsa-let-7d-5p	NM_001330231	NAP1L1	AGAGGTAGTAGGTTGCATAGTT#AAGTATGTAACCTGAAATCCTTA#.((((...(((((((((((.((#)).)))))))))))....)))).	2818	2841	1.0	-19.7	0	0.09313471	0.779	2.3382255454545455	0.9989486962499998	-9.551605062602114	17	23	11	3UTR	MIRT712372	1	1
hsa-let-7d-5p	NM_000437	PAFAH2	AGAGGTAGTAGGTTGCATAGTT#CTGTGTTCGCTTACTACTTG#..(((((((((((.((((((..#))))))..))))))))))).	2775	2795	1.0	-20.3	1	0.02886109	0.588	0.0	0.0	-5.813840636892696	17	20	11	3UTR	MIRT713521	0	0
hsa-let-7d-5p	NM_000456	SUOX	AGAGGTAGTAGGTTGCATAGTT#CTAATGCCTACTGCCATCA#.((((((((((((.........#.)))))))))).)).	2242	2261	1.0	-18.4	1	0.02220759	0.574	0.0	0.0	-5.618663395431772	12	15	10	3UTR	MIRT187716	0	0
hsa-let-7d-5p	NM_000554	CRX	AGAGGTAGTAGGTTGCATAGTT#TGCAAGCTCTACCTCC#.(((((((.((.(((((.....#))))).))))))))).	1519	1535	1.0	-21.0	1	0.004812624	0.382	0.0	0.0	-8.196517805199235	14	16	9	3UTR	MIRT735644	0	0
hsa-let-7d-5p	NM_000611	CD59	AGAGGTAGTAGGTTGCATAGTT#GCCTGCTACTTCTT#(((((((((((((.........#))))))))))))).	3882	3896	1.0	-19.3	1	0.03835732	0.588	0.0	0.0	-5.762913004276319	13	14	13	3UTR	MIRT512747	0	1
hsa-let-7d-5p	NM_000636	SOD2	AGAGGTAGTAGGTTGCATAGTT#ATGAACCTGGTACCTCA#.((((((.((((((.(((....#))))))))).)))))).	12520	12537	1.0	-20.9	1	0.003121794	0.5	0.0	0.0	-6.842409326788384	15	17	9	3UTR	MIRT525728	0	0
hsa-let-7d-5p	NM_000671	ADH5	AGAGGTAGTAGGTTGCATAGTT#TGTGACTGTACTATTTCTA#(((((((((((((((((.....#))))))).)))))))))).	1835	1854	1.0	-16.8	1	0.0009657141	0.662	3.7074497777777773	3.11299353375	-3.937574446201665	17	19	10	3UTR	MIRT695414	0	0
hsa-let-7d-5p	NM_001001924	MTUS1	AGAGGTAGTAGGTTGCATAGTT#GCAAACCTTCTACCTCC#.(((((((.(((((((......#)))).))).))))))).	5301	5318	1.0	-21.0	1	0.302939	0.544	0.0	0.0	-4.849714495602881	14	17	7	3UTR	MIRT472738	1	1
hsa-let-7d-5p	NM_001001924	MTUS1	AGAGGTAGTAGGTTGCATAGTT#ATGCAGCCTCCTCTG#(((((....(((((((((....#)))))))))))))).	4738	4753	1.0	-19.3	0	0.0001049797	0.603	0.0	0.0	-10.752244329692425	14	15	14	3UTR	MIRT472738	1	1
hsa-let-7d-5p	NM_001001925	MTUS1	AGAGGTAGTAGGTTGCATAGTT#GCAAACCTTCTACCTCC#.(((((((.(((((((......#)))).))).))))))).	5139	5156	1.0	-21.0	1	0.302939	0.544	0.0	0.0	-4.849714495602881	14	17	7	3UTR	MIRT472738	1	1
hsa-let-7d-5p	NM_001001925	MTUS1	AGAGGTAGTAGGTTGCATAGTT#ATGCAGCCTCCTCTG#(((((....(((((((((....#)))))))))))))).	4576	4591	1.0	-19.3	0	0.0001049797	0.603	0.0	0.0	-10.752244329692425	14	15	14	3UTR	MIRT472738	1	1
hsa-let-7d-5p	NM_001001931	MTUS1	AGAGGTAGTAGGTTGCATAGTT#ACAAAAGCAAACCTTCTACCTCC#.(((((((.(((((((......#.)))).))).))))))).	2650	2673	1.0	-20.8	1	0.302939	0.544	0.0	0.0	-4.849714495602881	14	18	7	3UTR	MIRT472738	1	1
hsa-let-7d-5p	NM_001001931	MTUS1	AGAGGTAGTAGGTTGCATAGTT#ATGCAGCCTCCTCTG#(((((....(((((((((....#)))))))))))))).	2093	2108	1.0	-19.3	0	0.0001049797	0.603	0.0	0.0	-10.752244329692425	14	15	14	3UTR	MIRT472738	1	1
hsa-let-7d-5p	NM_001002030	ECHDC1	AGAGGTAGTAGGTTGCATAGTT#ACTGTGTCAACCCAATACTATTTG#..(((((((((((((((((((.#)))))).)))))...)))))))).	2266	2290	1.0	-18.8	1	0.008106364	0.676	0.0	0.0	-4.95700071937229	19	24	8	3UTR	MIRT549848	0	1
hsa-let-7d-5p	NM_001003789	RABL2B	AGAGGTAGTAGGTTGCATAGTT#GGCTGGAGTGCAGTGGCGCAGTCTCGGCTCGCTGCAACCTCTGACTCCCTGGTTCAAACGATTCTCCTGCCTCA#.(((((((.((((((((.((((#.))))...))))))))..........................))))))).	1445	1519	1.0	-20.8	1	0.03638202	0.397	0.0	0.0	-4.849714495602881	19	50	8	3UTR	MIRT457249	0	0
hsa-let-7d-5p	NM_001004023	DYRK3	AGAGGTAGTAGGTTGCATAGTT#GGCTGGAGTGAAGTGGCGCAGTGTTGTCTGCAGCCTCAACCTCC#.(((((.(.((((((((.....#.))))))))).))))).	6129	6173	1.0	-20.7	0	8.523877e-05	0.426	0.0	0.0	-6.3934010304742	14	17	9	3UTR	MIRT735646	0	0
hsa-let-7d-5p	NM_001005353	AK4	AGAGGTAGTAGGTTGCATAGTT#ATGCCAACCTGACCTCG#.(((((..((((((((((....#)))).))))))))))).	3627	3644	1.0	-18.1	0	0.002584709	0.559	0.0	0.0	-7.650646301409068	15	17	11	3UTR	MIRT508933	0	0
hsa-let-7d-5p	NM_001005354	PRR13	AGAGGTAGTAGGTTGCATAGTT#TGGAACCTTACCTCTC#(((((((..(((((.((.....#)).)))))))))))).	878	894	1.0	-17.2	1	0.007431337	0.515	0.0	0.0	-8.043048593878694	14	16	12	3UTR	MIRT051711	0	0
hsa-let-7d-5p	NM_001008749	RAB19	AGAGGTAGTAGGTTGCATAGTT#TGCAACCTCTACCTCC#.(((((((.((((((((.....#))))))))))))))).	1604	1620	1.0	-25.1	1	0.01604808	0.456	0.0	0.0	-4.849714495602881	15	16	15	3UTR	MIRT681739	0	0
hsa-let-7d-5p	NM_001010853	PM20D2	AGAGGTAGTAGGTTGCATAGTT#TGCAACCTCTGCCTCC#.(((((((.((((((((.....#))))))))))))))).	1980	1996	1.0	-25.1	1	0.001558105	0.426	0.0	0.0	-4.849714495602881	15	16	15	3UTR	MIRT545388	0	0
hsa-let-7d-5p	NM_001010891	MTX3	AGAGGTAGTAGGTTGCATAGTT#TGCAACCTCTACCTCC#.(((((((.((((((((.....#))))))))))))))).	3443	3459	1.0	-25.1	1	0.00175282	0.412	0.0	0.0	-4.849714495602881	15	16	15	3UTR	MIRT682445	0	0
hsa-let-7d-5p	NM_001010989	HERPUD1	AGAGGTAGTAGGTTGCATAGTT#TGCAACCTCTACCTCC#.(((((((.((((((((.....#))))))))))))))).	2527	2543	1.0	-25.1	1	0.03432611	0.382	0.0	0.0	-4.849714495602881	15	16	15	3UTR	MIRT475734	0	0
hsa-let-7d-5p	NM_001011513	PDLIM5	AGAGGTAGTAGGTTGCATAGTT#AACTGAATACTTCTCCAATAGCAACCCCAAGCTACCTCC#.((((((((.((((((......#.))))))....)))))))).	3819	3858	1.0	-21.7	1	0.003963686	0.485	0.0	0.0	-5.035831305685297	14	20	8	3UTR	MIRT735657	0	0
hsa-let-7d-5p	NM_001011515	PDLIM5	AGAGGTAGTAGGTTGCATAGTT#ACTGTGCACTGCTGCTA#...((((((((..((((((((.#)))))))))))))))).	1669	1686	1.0	-20.3	0	0.0005942173	0.588	0.0	0.0	-11.150474115941337	16	17	16	3UTR	MIRT735657	0	0
hsa-let-7d-5p	NM_001011516	PDLIM5	AGAGGTAGTAGGTTGCATAGTT#ACTGTGCACTGCTGCTA#...((((((((..((((((((.#)))))))))))))))).	1609	1626	1.0	-20.3	0	0.0005942173	0.588	0.0	0.0	-11.150474115941337	16	17	16	3UTR	MIRT735657	0	0
hsa-let-7d-5p	NM_001011713	NAA30	AGAGGTAGTAGGTTGCATAGTT#GGCTGAACCTGCTGCCTTTA#((((((((((((((...(((((#))))))))))))))))))).	7455	7475	1.0	-22.4	1	0.03926218	0.529	0.0	0.0	-4.906073086755913	19	20	19	3UTR	MIRT191403	1	1
hsa-let-7d-5p	NM_001011713	NAA30	AGAGGTAGTAGGTTGCATAGTT#AACTGAGCAAAATAGATGCAACTTTCTTTTAATGGGGTGCTGCCTCTT#((((((((((((((((((....#.))))))))..............)))))))))).	3628	3676	1.0	-22.7	1	3.188277e-05	0.588	0.0	0.0	-3.937574446201665	18	34	10	3UTR	MIRT191403	1	1
hsa-let-7d-5p	NM_001012957	DISC1	AGAGGTAGTAGGTTGCATAGTT#TGCAACCTCTACCTCC#.(((((((.((((((((.....#))))))))))))))).	5813	5829	1.0	-25.1	1	0.001094966	0.412	0.0	0.0	-4.849714495602881	15	16	15	3UTR	MIRT452944	0	0
hsa-let-7d-5p	NM_001014380	KATNAL1	AGAGGTAGTAGGTTGCATAGTT#TGCAACCTCTGCCTCC#.(((((((.((((((((.....#))))))))))))))).	2390	2406	1.0	-25.1	1	0.003242585	0.485	0.0	0.0	-4.849714495602881	15	16	15	3UTR	MIRT032145	1	1
hsa-let-7d-5p	NM_001014380	KATNAL1	AGAGGTAGTAGGTTGCATAGTT#GGCTCACTGCAACTTCTGCCTCC#.(((((((.((((((((.((((#))))...))))))))))))))).	3869	3892	1.0	-23.2	1	0.008464401	0.397	0.0	0.0	-4.849714495602881	19	23	15	3UTR	MIRT032145	1	1
hsa-let-7d-5p	NM_001032386	SUOX	AGAGGTAGTAGGTTGCATAGTT#CTAATGCCTACTGCCATCA#.((((((((((((.........#.)))))))))).)).	2116	2135	1.0	-18.4	1	0.02220759	0.574	0.0	0.0	-5.618663395431772	12	15	10	3UTR	MIRT187716	0	0
hsa-let-7d-5p	NM_001032387	SUOX	AGAGGTAGTAGGTTGCATAGTT#CTAATGCCTACTGCCATCA#.((((((((((((.........#.)))))))))).)).	2007	2026	1.0	-18.4	1	0.02220759	0.574	0.0	0.0	-5.618663395431772	12	15	10	3UTR	MIRT187716	0	0
hsa-let-7d-5p	NM_001033	RRM1	AGAGGTAGTAGGTTGCATAGTT#GTAGCCAAACTACTTCTT#(((((((((.((((((......#))))))..))))))))).	2625	2643	1.0	-19.1	1	0.01035001	0.574	0.0	0.0	-5.180080914529843	15	18	9	3UTR	MIRT459737	0	0
hsa-let-7d-5p	NM_001033583	ACOT9	AGAGGTAGTAGGTTGCATAGTT#TGCAACCTCTACCTCC#.(((((((.((((((((.....#))))))))))))))).	3331	3347	1.0	-25.1	1	0.00227228	0.412	0.0	0.0	-4.849714495602881	15	16	15	3UTR	MIRT454855	0	0
hsa-let-7d-5p	NM_001034	RRM2	AGAGGTAGTAGGTTGCATAGTT#AGCCAGTTAAAAGATGCAGCCTCACTGCTTCA#.(((((((((((((((((....#.))))))))).)))))))).	1539	1571	1.0	-25.6	1	0.0004475445	0.618	0.0	0.0	-3.793324837357118	17	20	9	3UTR	MIRT297012	1	1
hsa-let-7d-5p	NM_001034	RRM2	AGAGGTAGTAGGTTGCATAGTT#AACTGTGTAGCTACCTCA#.((((((((....(((((((((#))))))))))))))))).	1355	1373	1.0	-21.4	1	0.007033856	0.588	0.0	0.0	-12.496539703358245	17	18	17	3UTR	MIRT297012	1	1
hsa-let-7d-5p	NM_001037171	ACOT9	AGAGGTAGTAGGTTGCATAGTT#TGCAACCTCTACCTCC#.(((((((.((((((((.....#))))))))))))))).	3358	3374	1.0	-25.1	1	0.00227228	0.412	0.0	0.0	-4.849714495602881	15	16	15	3UTR	MIRT454855	0	0
hsa-let-7d-5p	NM_001039570	KREMEN1	AGAGGTAGTAGGTTGCATAGTT#AGCTGAGAAAAGCAGCCTGTGCCTCTG#(((((((.((((((((......#.))))))))))))))).	3412	3439	1.0	-23.6	1	6.305751e-07	0.397	0.0	0.0	-6.251209375382295	15	17	15	3UTR	MIRT300892	1	1
hsa-let-7d-5p	NM_001039999	FAM83G	AGAGGTAGTAGGTTGCATAGTT#AGCCTTTTCCAAGTGGGACATGGAAGAGGCAGCCTGCTGCCTG#..((((((((((((((......#.)))))))))))))).	3801	3844	1.0	-26.5	1	2.723995e-07	0.426	0.0	0.0	-4.95700071937229	14	16	14	3UTR	MIRT476974	1	0
hsa-let-7f-5p	NM_201269	ZNF644	TGAGGTAGTAGATTGTATAGTT#GTGCATCCATGCTACCTCC#.((((((((((..(((((....#)))))..).))))))))).	4752	4771	0.9615384615384616	-18.4	1	0.01579386	0.603	0.8890601818181818	0.86775069125	-8.429258759619717	15	19	9	3UTR	MIRT505015	1	1
hsa-let-7f-5p	NM_001376376	CELF1	TGAGGTAGTAGATTGTATAGTT#CTGTACAGCTACCTTC#.((((((((....(((((((..#))))))))))))))).	2409	2425	0.9615384615384616	-16.8	1	0.001307899	0.559	4.604964	4.089887070000001	-12.496539703358245	15	16	15	3UTR	MIRT502843	1	0
hsa-let-7f-5p	NM_001399	EDA	TGAGGTAGTAGATTGTATAGTT#AGCCCAAACCTGGGAAGGCCAGCCTTGTACAGTCTGCTCCTCT#.((((.((((((((((((((..#.)))))))))))))))))).	2872	2915	0.9615384615384616	-24.5	0	0.06354813	0.515	0.17531293857142857	0.27676882925	-5.694283598550164	18	20	18	3UTR	MIRT051411	1	0
hsa-let-7f-5p	NM_016620	ZNF644	TGAGGTAGTAGATTGTATAGTT#ACTCCAGTTGCATTTCTCAGACAATAAAGTGGTGCATCCATGCTACCTCC#.((((((((((..(((((....#.)))))..).))))))))).	1242	1292	0.9615384615384616	-18.8	1	0.01579386	0.603	1.3908814545454542	2.3925393987500003	-8.429258759619717	15	20	9	3UTR	MIRT505015	1	1
hsa-let-7f-5p	NM_001257413	IKZF3	TGAGGTAGTAGATTGTATAGTT#GCAATCTGCCCACCTCAG#((((((.(((((((((......#)))))))))..)))))).	5910	5928	0.9615384615384616	-20.1	0	0.05188554	0.456	2.729290777777778	0.8168198150000001	-5.4812609810729835	15	18	9	3UTR	MIRT511385	0	1
hsa-let-7f-5p	NM_018662	DISC1	TGAGGTAGTAGATTGTATAGTT#TCTACTGCCTCAG#((((((((((((..........#)))))))))))).	5909	5922	0.9615384615384616	-19.8	1	0.004613248	0.471	0.10049858333333335	-0.34186963375	-7.052043616942562	12	13	12	3UTR	MIRT452942	0	0
hsa-let-7f-5p	NM_020786	PDP2	TGAGGTAGTAGATTGTATAGTT#AGCTGATAGGATCTATGCCTCT#.((((((.((((((.(((((((#))))).)).)))))))))))).	2440	2462	0.9615384615384616	-19.2	1	0.01256393	0.544	0.788364625	0.21502171625000005	-6.842409326788384	19	22	12	3UTR	MIRT284528	1	1
hsa-let-7f-5p	NM_001005609	EDA	TGAGGTAGTAGATTGTATAGTT#AGCCCAAACCTGGGAAGGCCAGCCTTGTACAGTCTGCTCCTCT#.((((.((((((((((((((..#.)))))))))))))))))).	2866	2909	0.9615384615384616	-24.5	0	0.06354813	0.515	0.0	0.0	-5.694283598550164	18	20	18	3UTR	MIRT051411	1	0
hsa-let-7f-5p	NM_001005612	EDA	TGAGGTAGTAGATTGTATAGTT#AGCCCAAACCTGGGAAGGCCAGCCTTGTACAGTCTGCTCCTCT#.((((.((((((((((((((..#.)))))))))))))))))).	2857	2900	0.9615384615384616	-24.5	0	0.06354813	0.515	0.0	0.0	-5.694283598550164	18	20	18	3UTR	MIRT051411	1	0
hsa-let-7f-5p	NM_032833	PPP1R15B	TGAGGTAGTAGATTGTATAGTT#GCTTACAGGGTTACTACCTCAG#(((((((((((.(((((.(((.#))))))))..))))))))))).	3967	3989	0.9743589743589743	-20.7	1	0.0008107147	0.676	1.3851835454545454	1.1006836775000002	-7.284377755798021	19	22	11	3UTR	MIRT470418	1	1
hsa-let-7f-5p	NM_001330475	ZBTB8OS	TGAGGTAGTAGATTGTATAGTT#GGCTTACTGCAAGCTCCACCTCCCGGGTTCACGCCATTCTCCTACCTCAG#((((((((.(((.((.......#.)).))).)))))))).	1487	1537	1.0	-16.9	1	0.1037653	0.382	5.230614500000001	2.3360854587499995	-6.516143797417284	13	17	8	3UTR	MIRT516082	0	1
hsa-let-7f-5p	NM_001347256	CYP19A1	TGAGGTAGTAGATTGTATAGTT#TCTACTGCCTCAA#((((((((((((..........#)))))))))))).	1969	1982	1.0	-19.8	1	0.000110829	0.5	-0.2204482	0.28492639499999994	-7.052043616942562	12	13	12	3UTR	MIRT006943	1	0
hsa-let-7f-5p	NM_001364022	CCNG1	TGAGGTAGTAGATTGTATAGTT#GACATTTGTATCTACGATAAAAATTTTTATACAGAACCTACTGCCTCAA#(((((((((((.((((((((..#.))))))))...))))))))))).	1533	1582	1.0	-23.6	1	0.1233343	0.676	0.0	0.0	-7.284377755798021	19	24	11	3UTR	MIRT051412	0	0
hsa-let-7f-5p	NM_001366305	KPNA5	TGAGGTAGTAGATTGTATAGTT#AATTCAGCAATCTACTGGCTG#..((.(((((((((((......#.))))))))))).)).	4845	4866	1.0	-18.3	0	0.0004013811	0.647	0.0	0.0	-9.076037894184761	13	16	11	3UTR	MIRT502107	1	0
hsa-let-7f-5p	NM_001366306	KPNA5	TGAGGTAGTAGATTGTATAGTT#AATTCAGCAATCTACTGGCTG#..((.(((((((((((......#.))))))))))).)).	4785	4806	1.0	-18.3	0	0.0004013811	0.647	0.0	0.0	-9.076037894184761	13	16	11	3UTR	MIRT502107	1	0
hsa-let-7f-5p	NM_001366307	KPNA5	TGAGGTAGTAGATTGTATAGTT#AATTCAGCAATCTACTGGCTG#..((.(((((((((((......#.))))))))))).)).	4891	4912	1.0	-18.3	0	0.0004013811	0.647	0.564916390909091	1.0585004812499998	-9.076037894184761	13	16	11	3UTR	MIRT502107	1	0
hsa-let-7f-5p	XM_017024551	SOCS7	TGAGGTAGTAGATTGTATAGTT#GTTAGATCTTTCCCTTCCCTGCTGCCTCG#.((((((((((...........#.)))))))))).	6041	6070	1.0	-17.9	1	0.08510256	0.515	0.0	0.0	-10.254597317694373	10	12	10	3UTR	MIRT735721	0	1
hsa-let-7f-5p	XM_047423214	FBXW2	TGAGGTAGTAGATTGTATAGTT#GCGATTCTCCTGCCTCAG#((((((((.(((((((......#))))).)).)))))))).	5479	5497	1.0	-17.7	1	0.003663109	0.397	0.0	0.0	-4.993964104447428	15	18	8	3UTR	MIRT523732	0	0
hsa-let-7f-5p	XM_047423435	ROR2	TGAGGTAGTAGATTGTATAGTT#TCTGCTGCCTCC#.(((((((((((..........#))))))))))).	3557	3569	1.0	-18.2	1	0.01669383	0.485	0.0	0.0	-6.907794008098015	11	12	11	3UTR	MIRT051386	0	0
hsa-let-7f-5p	XM_047429469	STAT2	TGAGGTAGTAGATTGTATAGTT#GCAATCCTCCTACCTCAG#((((((((..((((((......#))))))...)))))))).	2590	2608	1.0	-18.3	1	0.01148797	0.412	0.0	0.0	-6.236470572775607	14	18	8	3UTR	MIRT681505	0	1
hsa-let-7f-5p	XM_047431995	PRORP	TGAGGTAGTAGATTGTATAGTT#GCAATCTTCCTACCTCAG#((((((((.(((((((......#)))))))..)))))))).	2935	2953	1.0	-20.8	1	0.02379309	0.471	0.0	0.0	-4.993964104447428	15	18	8	3UTR	MIRT549798	1	0
hsa-let-7f-5p	XM_047441143	ZNF280B	TGAGGTAGTAGATTGTATAGTT#GAGTATTGGTTCCTGAACATCAGCAGTCTTGGCTGCCTCT#.(((((((((((((((......#.)))))))..)))))))).	3722	3762	1.0	-20.8	1	9.541487e-05	0.456	0.0	0.0	-3.793324837357118	15	19	8	3UTR	MIRT051397	0	1
hsa-let-7f-5p	XM_047445927	SLC19A3	TGAGGTAGTAGATTGTATAGTT#GCAATTCTCCTGCCTCAG#((((((((.(((((((......#))))).)).)))))))).	4505	4523	1.0	-18.0	1	0.005768149	0.382	0.0	0.0	-4.993964104447428	15	18	8	3UTR	MIRT681940	0	0
hsa-let-7f-5p	NM_153485	NUP155	TGAGGTAGTAGATTGTATAGTT#GCAATTTGCCTGCCTCAG#((((((((((((((((......#))))))))).))))))).	5811	5829	1.0	-20.1	1	0.001342205	0.441	2.9516813529411765	3.9139930062500006	-3.937574446201665	16	18	9	3UTR	MIRT506362	1	0
hsa-let-7f-5p	NM_170665	ATP2A2	TGAGGTAGTAGATTGTATAGTT#AGAGTCTTGCTACCTCAG#((((((((((((((.(......#).))))).))))))))).	4152	4170	1.0	-18.8	1	0.0006131058	0.559	4.687654666666666	1.7672225712500003	-4.6730240064523	15	18	9	3UTR	MIRT051398	1	1
hsa-let-7f-5p	NM_177966	PDE12	TGAGGTAGTAGATTGTATAGTT#GCGATTCTCCTGCCTCAG#((((((((.(((((((......#))))).)).)))))))).	2358	2376	1.0	-17.7	1	0.002490293	0.397	0.26141747499999995	0.106754885	-4.993964104447428	15	18	8	3UTR	MIRT120922	1	1
hsa-let-7f-5p	NM_183230	IKZF3	TGAGGTAGTAGATTGTATAGTT#AACTGTGAAGTTTACTCCTCT#.((((.((((((((.(((((((#))))))).)))))))))))).	9499	9520	1.0	-19.2	0	0.01061463	0.559	0.6780195	1.6919149645	-6.429733158800799	19	21	12	3UTR	MIRT511385	0	1
hsa-let-7f-5p	NM_183231	IKZF3	TGAGGTAGTAGATTGTATAGTT#AACTGTGAAGTTTACTCCTCT#.((((.((((((((.(((((((#))))))).)))))))))))).	9331	9352	1.0	-19.2	0	0.01061463	0.559	1.1577290000000002	2.2097449004999996	-6.429733158800799	19	21	12	3UTR	MIRT511385	0	1
hsa-let-7f-5p	NM_183232	IKZF3	TGAGGTAGTAGATTGTATAGTT#AACTGTGAAGTTTACTCCTCT#.((((.((((((((.(((((((#))))))).)))))))))))).	9382	9403	1.0	-19.2	0	0.01061463	0.559	0.6780195	1.6919149645	-6.429733158800799	19	21	12	3UTR	MIRT511385	0	1
hsa-let-7f-5p	NM_198514	NHLRC2	TGAGGTAGTAGATTGTATAGTT#AATACGGACATAGTTTACTACCTTT#.(((((((((((((((......#.))))))))))))))).	9333	9358	1.0	-18.3	1	0.09798892	0.691	0.0	0.0	-3.793324837357118	15	17	15	3UTR	MIRT701431	1	0
hsa-let-7f-5p	NM_199246	CCNG1	TGAGGTAGTAGATTGTATAGTT#GATAAAAATTTTTATACAGAACCTACTGCCTCAA#(((((((((((.((((((((..#.))))))))...))))))))))).	1688	1722	1.0	-23.6	1	0.1233343	0.676	0.10181180909090909	-0.12610554125000006	-7.284377755798021	19	24	11	3UTR	MIRT051412	0	0
hsa-let-7f-5p	NM_001369846	ZBTB37	TGAGGTAGTAGATTGTATAGTT#GCAATCCTCCTACCTCAT#((((((((..((((((......#))))))...)))))))).	10891	10909	1.0	-18.1	1	0.4417101	0.426	0.0	0.0	-6.236470572775607	14	18	8	3UTR	MIRT574362	1	0
hsa-let-7f-5p	NM_001371411	SLC19A3	TGAGGTAGTAGATTGTATAGTT#GCAATTCTCCTGCCTCAG#((((((((.(((((((......#))))).)).)))))))).	4166	4184	1.0	-18.0	1	0.005768149	0.382	0.0	0.0	-4.993964104447428	15	18	8	3UTR	MIRT681940	0	0
hsa-let-7f-5p	NM_001379446	SLC11A2	TGAGGTAGTAGATTGTATAGTT#GGCTGGTCTCAAACTCTTGACCTCAAGTGATCTACCTGCCTCAG#((((((((((((((........#.))))))).))))))).	3209	3253	1.0	-18.6	1	0.004471198	0.485	0.0	0.0	-4.906073086755913	14	17	7	3UTR	MIRT461168	0	0
hsa-let-7f-5p	NM_001385111	STAT2	TGAGGTAGTAGATTGTATAGTT#GCAATCCTCCTACCTCAG#((((((((..((((((......#))))))...)))))))).	3396	3414	1.0	-18.3	1	0.01148797	0.412	0.0	0.0	-6.236470572775607	14	18	8	3UTR	MIRT681505	0	1
hsa-let-7f-5p	NM_001395199	ZBTB37	TGAGGTAGTAGATTGTATAGTT#GCAATCCTCCTACCTCAT#((((((((..((((((......#))))))...)))))))).	10843	10861	1.0	-18.1	1	0.4417101	0.426	0.0	0.0	-6.236470572775607	14	18	8	3UTR	MIRT574362	1	0
hsa-let-7f-5p	NM_014598	SOCS7	TGAGGTAGTAGATTGTATAGTT#CTGCTGCCTCG#.((((((((((...........#)))))))))).	6161	6172	1.0	-17.5	1	0.08510256	0.515	0.32082726	0.016220452500000093	-10.254597317694373	10	11	10	3UTR	MIRT735721	0	1
hsa-let-7f-5p	NM_014672	PRORP	TGAGGTAGTAGATTGTATAGTT#GCAATCTTCCTACCTCAG#((((((((.(((((((......#)))))))..)))))))).	2812	2830	1.0	-20.8	1	0.02379309	0.471	0.09476187500000001	0.0035749625000000163	-4.993964104447428	15	18	8	3UTR	MIRT549798	1	0
hsa-let-7f-5p	NM_014923	FNDC3A	TGAGGTAGTAGATTGTATAGTT#GCTATATTTCTACCTCCTCAT#(((((..(((((..(((((((.#))))))).)))))..))))).	3967	3988	1.0	-20.4	0	0.2253434	0.662	3.5102517142857144	3.417739101250001	-9.528190272452681	17	21	7	3UTR	MIRT068790	1	1
hsa-let-7f-5p	NM_015042	ZNF609	TGAGGTAGTAGATTGTATAGTT#CTCTGCCTTCTGCTGCCCTCAT#((((((((((((..(((.((..#)).)))..))))))))).))).	6501	6523	1.0	-19.0	1	0.009664322	0.426	0.4029209469230769	0.316915255125	-6.083544976388314	17	22	9	3UTR	MIRT735727	0	0
hsa-let-7f-5p	NM_015042	ZNF609	TGAGGTAGTAGATTGTATAGTT#AGCTCAGTCTATAACCTCC#.(((((.((((((((...((((#)))))))))))).))))).	5766	5785	1.0	-17.1	0	0.01076319	0.632	0.519476875	0.8331298474999999	-5.570060452532049	17	19	12	3UTR	MIRT735727	0	0
hsa-let-7f-5p	NM_015328	AHCYL2	TGAGGTAGTAGATTGTATAGTT#CTATGCTGGTCTGCCTCAA#((((((((......((((((..#))))))....)))))))).	3398	3417	1.0	-17.8	1	0.005601633	0.574	0.659102525	0.272850845	-14.554018887968963	14	19	8	3UTR	MIRT482219	0	0
hsa-let-7f-5p	NM_017774	CDKAL1	TGAGGTAGTAGATTGTATAGTT#TTGTACTGGTCATGCTGCCTCC#.(((((((((((((((((((..#)))))).)))).))))))))).	2005	2027	1.0	-20.4	1	0.002543282	0.515	-0.3209031380952382	0.03438624624999992	-3.793324837357118	19	22	9	3UTR	MIRT681760	0	1
hsa-let-7f-5p	NM_017774	CDKAL1	TGAGGTAGTAGATTGTATAGTT#GCAGTCTTCTTGCCTCAG#((((((((.(((((((......#)))))))..)))))))).	3110	3128	1.0	-18.5	1	0.02421742	0.426	-0.32005375	0.053195655	-4.993964104447428	15	18	8	3UTR	MIRT681760	0	1
hsa-let-7f-5p	NM_018086	FIGN	TGAGGTAGTAGATTGTATAGTT#ACTGGCAATCTGGCTACTTA#..((((((((((((((.((((.#)))))))))))).)))))).	7872	7892	1.0	-17.2	1	0.006498164	0.676	4.127357933333333	4.502544575000001	-4.95700071937229	18	20	12	3UTR	MIRT507251	1	1
hsa-let-7f-5p	NM_018184	ARL8B	TGAGGTAGTAGATTGTATAGTT#CTGTACAATATACTGCACTG#..((((((((.(((((((((..#))))))))).)))))).)).	2240	2260	1.0	-18.1	1	0.005317854	0.603	1.8096222222222222	1.6476079895000004	-7.7817751947826395	17	20	9	3UTR	MIRT680837	0	0
hsa-let-7f-5p	NM_001204171	MDM4	TGAGGTAGTAGATTGTATAGTT#GCGATCCTCCTGCCTCAA#((((((((..((((((......#))))))...)))))))).	9283	9301	1.0	-18.0	1	0.01821202	0.382	-0.78931375	-0.06379354500000005	-6.236470572775607	14	18	8	3UTR	MIRT112243	1	1
hsa-let-7f-5p	NM_001204172	MDM4	TGAGGTAGTAGATTGTATAGTT#GCGATCCTCCTGCCTCAA#((((((((..((((((......#))))))...)))))))).	8455	8473	1.0	-18.0	1	0.01821202	0.382	-0.78931375	-0.06379354500000005	-6.236470572775607	14	18	8	3UTR	MIRT112243	1	1
hsa-let-7f-5p	NM_001207067	BZW1	TGAGGTAGTAGATTGTATAGTT#TGCAATCTCTGCCTCC#.(((((((.((((((((.....#))))))))))))))).	4313	4329	1.0	-20.9	1	0.02175361	0.471	0.164748375	-0.10800601249999994	-4.849714495602881	15	16	15	3UTR	MIRT300038	1	1
hsa-let-7f-5p	NM_001207068	BZW1	TGAGGTAGTAGATTGTATAGTT#TGCAATCTCTGCCTCC#.(((((((.((((((((.....#))))))))))))))).	4340	4356	1.0	-20.9	1	0.02175361	0.471	0.164748375	-0.10800601249999994	-4.849714495602881	15	16	15	3UTR	MIRT300038	1	1
hsa-let-7f-5p	NM_001207069	BZW1	TGAGGTAGTAGATTGTATAGTT#TGCAATCTCTGCCTCC#.(((((((.((((((((.....#))))))))))))))).	4357	4373	1.0	-20.9	1	0.02175361	0.471	0.0	0.0	-4.849714495602881	15	16	15	3UTR	MIRT300038	1	1
hsa-let-7f-5p	NM_001256678	PRORP	TGAGGTAGTAGATTGTATAGTT#GCAATCTTCCTACCTCAG#((((((((.(((((((......#)))))))..)))))))).	2764	2782	1.0	-20.8	1	0.02379309	0.471	0.09476187500000001	0.0035749625000000163	-4.993964104447428	15	18	8	3UTR	MIRT549798	1	0
hsa-let-7f-5p	NM_001256679	PRORP	TGAGGTAGTAGATTGTATAGTT#GCAATCTTCCTACCTCAG#((((((((.(((((((......#)))))))..)))))))).	2259	2277	1.0	-20.8	1	0.02379309	0.471	0.09476187500000001	0.0035749625000000163	-4.993964104447428	15	18	8	3UTR	MIRT549798	1	0
hsa-let-7f-5p	NM_001256680	PRORP	TGAGGTAGTAGATTGTATAGTT#GCAATCTTCCTACCTCAG#((((((((.(((((((......#)))))))..)))))))).	1807	1825	1.0	-20.8	1	0.02379309	0.471	0.09476187500000001	0.0035749625000000163	-4.993964104447428	15	18	8	3UTR	MIRT549798	1	0
hsa-let-7f-5p	NM_001256681	PRORP	TGAGGTAGTAGATTGTATAGTT#GCAATCTTCCTACCTCAG#((((((((.(((((((......#)))))))..)))))))).	1759	1777	1.0	-20.8	1	0.02379309	0.471	0.0	0.0	-4.993964104447428	15	18	8	3UTR	MIRT549798	1	0
hsa-let-7f-5p	NM_001276320	YOD1	TGAGGTAGTAGATTGTATAGTT#CTACTACCTCAC#(((((((((((...........#))))))))))).	1281	1293	1.0	-18.1	1	0.01581462	0.529	0.5739848727272728	0.5868671087500001	-10.39884692653892	11	12	11	3UTR	MIRT510519	1	1
hsa-let-7f-5p	NM_001277783	ATG12	TGAGGTAGTAGATTGTATAGTT#ACTTATTGCATACTGCCTCAG#((((((((((...((((.....#.)))))))))))))).	3257	3278	1.0	-16.9	1	0.02502829	0.632	0.03724400000000001	0.13829436374999998	-11.398282843874613	14	16	14	3UTR	MIRT481387	0	0
hsa-let-7f-5p	NM_001278516	MDM4	TGAGGTAGTAGATTGTATAGTT#GCGATCCTCCTGCCTCAA#((((((((..((((((......#))))))...)))))))).	9365	9383	1.0	-18.0	1	0.01821202	0.382	-0.78931375	-0.06379354500000005	-6.236470572775607	14	18	8	3UTR	MIRT112243	1	1
hsa-let-7f-5p	NM_001278517	MDM4	TGAGGTAGTAGATTGTATAGTT#GCGATCCTCCTGCCTCAA#((((((((..((((((......#))))))...)))))))).	9139	9157	1.0	-18.0	1	0.01821202	0.382	-0.78931375	-0.06379354500000005	-6.236470572775607	14	18	8	3UTR	MIRT112243	1	1
hsa-let-7f-5p	NM_001278518	MDM4	TGAGGTAGTAGATTGTATAGTT#GCGATCCTCCTGCCTCAA#((((((((..((((((......#))))))...)))))))).	8954	8972	1.0	-18.0	1	0.01821202	0.382	0.0	0.0	-6.236470572775607	14	18	8	3UTR	MIRT112243	1	1
hsa-let-7f-5p	NM_001278519	MDM4	TGAGGTAGTAGATTGTATAGTT#GCGATCCTCCTGCCTCAA#((((((((..((((((......#))))))...)))))))).	8764	8782	1.0	-18.0	1	0.01821202	0.382	-0.78931375	-0.06379354500000005	-6.236470572775607	14	18	8	3UTR	MIRT112243	1	1
hsa-let-7f-5p	NM_001284514	IKZF3	TGAGGTAGTAGATTGTATAGTT#AACTGTGAAGTTTACTCCTCT#.((((.((((((((.(((((((#))))))).)))))))))))).	9742	9763	1.0	-19.2	0	0.01061463	0.559	0.8370001250000001	1.8081294990384613	-6.429733158800799	19	21	12	3UTR	MIRT511385	0	1
hsa-let-7f-5p	NM_001284516	IKZF3	TGAGGTAGTAGATTGTATAGTT#AACTGTGAAGTTTACTCCTCT#.((((.((((((((.(((((((#))))))).)))))))))))).	9062	9083	1.0	-19.2	0	0.01061463	0.559	2.673498125	2.4644455250000004	-6.429733158800799	19	21	12	3UTR	MIRT511385	0	1
hsa-let-7f-5p	NM_001289410	FAM104A	TGAGGTAGTAGATTGTATAGTT#AGAGTCTGCACCTCAG#((((((.(((((((.(......#).))))))))))))).	1237	1253	1.0	-17.5	0	0.000374198	0.544	-0.3112496428571428	-0.14487161875000004	-6.216710541323619	14	16	13	3UTR	MIRT574785	1	1
hsa-let-7f-5p	NM_001289411	FAM104A	TGAGGTAGTAGATTGTATAGTT#AGAGTCTGCACCTCAG#((((((.(((((((.(......#).))))))))))))).	1255	1271	1.0	-17.5	0	0.000374198	0.544	0.17869842857142856	-0.05436697625000002	-6.216710541323619	14	16	13	3UTR	MIRT574785	1	1
hsa-let-7f-5p	NM_001289412	FAM104A	TGAGGTAGTAGATTGTATAGTT#AGAGTCTGCACCTCAG#((((((.(((((((.(......#).))))))))))))).	1169	1185	1.0	-17.5	0	0.000374198	0.544	0.0	0.0	-6.216710541323619	14	16	13	3UTR	MIRT574785	1	1
hsa-let-7f-5p	NM_018373	SYNJ2BP	TGAGGTAGTAGATTGTATAGTT#GCGATTCTCCTGCCTCAG#((((((((.(((((((......#))))).)).)))))))).	6077	6095	1.0	-17.7	1	0.01390017	0.412	0.977604625	0.8650985325	-4.993964104447428	15	18	8	3UTR	MIRT466725	1	0
hsa-let-7f-5p	NM_018566	YOD1	TGAGGTAGTAGATTGTATAGTT#CTACTACCTCAC#(((((((((((...........#))))))))))).	1250	1262	1.0	-18.1	1	0.01581462	0.529	0.4841023181818182	0.56462142625	-10.39884692653892	11	12	11	3UTR	MIRT510519	1	1
hsa-let-7f-5p	NM_031226	CYP19A1	TGAGGTAGTAGATTGTATAGTT#TCTACTGCCTCAA#((((((((((((..........#)))))))))))).	2101	2114	1.0	-19.8	1	0.000110829	0.5	0.3759568166666665	0.08167794874999998	-7.052043616942562	12	13	12	3UTR	MIRT006943	1	0
hsa-let-7f-5p	NM_001145447	ZNF200	TGAGGTAGTAGATTGTATAGTT#TGCTGCCTCAA#((((((((((............#)))))))))).	1817	1828	1.0	-15.5	1	0.0008084191	0.529	1.3438006599999999	1.4821860112500005	-13.223621401949268	10	11	10	3UTR	MIRT545888	1	1
hsa-let-7f-5p	NM_001160423	IGF2BP1	TGAGGTAGTAGATTGTATAGTT#TGTGCGAAGTAAACTACCTCAA#((((((((((..(((((((...#)))))))..)..))))))))).	3296	3318	1.0	-18.0	1	0.04190603	0.588	4.6468	1.9398136562500004	-10.10915223120837	17	22	9	3UTR	MIRT051402	1	1
hsa-let-7f-5p	NM_001164540	DISC1	TGAGGTAGTAGATTGTATAGTT#TCTACTGCCTCAG#((((((((((((..........#)))))))))))).	5543	5556	1.0	-19.8	1	0.004613248	0.471	0.0	0.0	-7.052043616942562	12	13	12	3UTR	MIRT452942	0	0
hsa-let-7f-5p	NM_001165931	RRM2	TGAGGTAGTAGATTGTATAGTT#AACTGTGTAGCTACCTCAC#(((((((((....(((((((((#)))))))))))))))))).	1526	1545	1.0	-17.1	1	0.005318808	0.603	0.9426172799999999	0.060711694999999996	-12.640789312202793	18	19	18	3UTR	MIRT297014	1	1
hsa-let-7f-5p	NM_005744	ARIH1	TGAGGTAGTAGATTGTATAGTT#GCGATCTGCCTGCCTCAG#((((((((((((((((......#))))))))).))))))).	16884	16902	1.0	-22.4	1	0.001304543	0.471	-0.026556235294117648	-0.03768727499999999	-3.937574446201665	16	18	9	3UTR	MIRT559496	0	0
hsa-let-7f-5p	NM_005744	ARIH1	TGAGGTAGTAGATTGTATAGTT#GTGCAATCTGCAACCTCC#.(((((.(((((((((((....#))))))))))).))))).	14580	14598	1.0	-22.7	0	0.0001156363	0.397	-0.2138310909090909	-0.025943112499999976	-5.337011372228436	16	18	11	3UTR	MIRT559496	0	0
hsa-let-7f-5p	NM_005920	MEF2D	TGAGGTAGTAGATTGTATAGTT#TCTGCTGCCTCT#.(((((((((((..........#))))))))))).	5487	5499	1.0	-18.6	1	0.0212653	0.412	1.3994831818181817	2.840302734999999	-6.907794008098015	11	12	11	3UTR	MIRT051353	1	0
hsa-let-7f-5p	NM_006546	IGF2BP1	TGAGGTAGTAGATTGTATAGTT#TGTGCGAAGTAAACTACCTCAA#((((((((((..(((((((...#)))))))..)..))))))))).	3713	3735	1.0	-18.0	1	0.04190603	0.588	4.6468	1.9398136562500004	-10.10915223120837	17	22	9	3UTR	MIRT051402	1	1
hsa-let-7f-5p	NM_012199	AGO1	TGAGGTAGTAGATTGTATAGTT#AGCTGCTGTCTACTGCCTGAA#(.(((((((((((.((..((((#)))))).))))))))))).).	9751	9772	1.0	-19.6	1	0.00893732	0.544	0.019986129090909084	0.12439036987499995	-5.958090245737242	18	21	11	3UTR	MIRT437856	1	1
hsa-let-7f-5p	NM_001722	POLR3D	TGAGGTAGTAGATTGTATAGTT#GGCTGGTCTCAAACTCCTCACCTCAAGTGATCTACCTGCCTCAG#((((((((((((((........#.))))))).))))))).	4621	4665	1.0	-18.6	1	0.009248221	0.456	0.0	0.0	-4.906073086755913	14	17	7	3UTR	MIRT123976	1	1
hsa-let-7f-5p	NM_001955	EDN1	TGAGGTAGTAGATTGTATAGTT#TATAATATTTTCATGGTAATCTACTAGCTCT#.(((.((((((((((.......#.)))))))))).))).	1628	1659	1.0	-17.5	0	0.002853696	0.735	3.0230790599999997	4.32380307	-8.145411092473203	13	16	10	3UTR	MIRT244070	1	1
hsa-let-7f-5p	NM_002022	FMO4	TGAGGTAGTAGATTGTATAGTT#ATGCATCTTCTACCCTGCTACCTCAG#(((((((((((...........#.))))))))))).	2241	2267	1.0	-18.8	1	0.09069591	0.647	0.0	0.0	-10.39884692653892	11	13	11	3UTR	MIRT617850	0	1
hsa-let-7f-5p	NM_002065	GLUL	TGAGGTAGTAGATTGTATAGTT#GCGATTCTCCTGCCTCAG#((((((((.(((((((......#))))).)).)))))))).	4824	4842	1.0	-17.7	1	0.02903677	0.456	0.0	0.0	-4.993964104447428	15	18	8	3UTR	MIRT051362	0	0
hsa-let-7f-5p	NM_002188	IL13	TGAGGTAGTAGATTGTATAGTT#TCTGCTACCTCAC#((((((((((((..........#)))))))))))).	1017	1030	1.0	-19.5	1	0.003703759	0.456	0.0	0.0	-7.052043616942562	12	13	12	3UTR	MIRT006400	1	1
hsa-let-7f-5p	NM_002393	MDM4	TGAGGTAGTAGATTGTATAGTT#GCGATCCTCCTGCCTCAA#((((((((..((((((......#))))))...)))))))).	9433	9451	1.0	-18.0	1	0.01821202	0.382	0.0	0.0	-6.236470572775607	14	18	8	3UTR	MIRT112243	1	1
hsa-let-7f-5p	NM_003109	SP1	TGAGGTAGTAGATTGTATAGTT#AATAAGGACAGTCTAGCTGCCTCAA#((((((((((((((((......#.)))))))).)))))))).	6069	6094	1.0	-22.8	1	0.0008120165	0.485	0.8317080770588235	0.7391586305	-3.937574446201665	16	19	8	3UTR	MIRT051372	0	0
[truncated: 8,626 more rows]

## Sheet: Sheet3
Dataset: plac pathol increta vs creta
Enrichment analysis: Biological pathway
Number of genes in the dataset: 2582
[truncated: 498 more rows]
