# Supplementary material for: Diagnostic Role of Cell-Free miRNAs in Identifying Placenta Accreta Spectrum during the First-Trimester Screening
Source: Preprints.org preprint supplement (doi:10.20944/preprints202312.0752.v1), 2023-12-12
Supplement: Supplementary file 4 [file Table S3.xlsx]

## Sheet: Sheet1
Pni versus Pnc
Gene	baseMean	log2FoldChange2	lfcSE	stat	pvalue
hsa-miR-182-5p	669.517	4.11461	1.05827	3.88806	0.000101047
hsa-miR-99a-5p	31053	4.69357	1.21174	3.87341	0.000107323
hsa-miR-375	438.126	3.4392	0.895116	3.84219	0.000121943
hsa-miR-3615	1903.52	4.70026	1.23819	3.79606	0.000147015
hsa-miR-342-5p	262.63	4.39426	1.16359	3.77646	0.000159072
hsa-miR-320d	350.756	3.81877	1.02795	3.71495	0.000203241
hsa-miR-25-3p	21834.1	4.54253	1.22476	3.70892	0.000208145
hsa-miR-15b-3p	141.799	4.65312	1.25706	3.70158	0.000214261
hsa-let-7a-3p	194.307	4.21959	1.15458	3.65467	0.000257516
hsa-miR-144-3p	845.658	4.50194	1.2565	3.58293	0.000339756
hsa-miR-92a-3p	182305	4.08581	1.14352	3.57302	0.000352889
hsa-miR-10a-5p	5131.8	4.03254	1.13271	3.56008	0.000370737
hsa-miR-19b-3p	298.029	4.10558	1.1537	3.55863	0.000372799
hsa-miR-183-5p	1845.58	3.78849	1.10152	3.43935	0.000583121
hsa-miR-30e-5p	3188.34	3.78844	1.10222	3.4371	0.000587971
hsa-miR-16-5p	4044.29	3.9505	1.152	3.42924	0.000605267
hsa-miR-192-5p	2492.22	4.03532	1.19589	3.37432	0.000739991
hsa-miR-320c	1175.11	3.36414	1.00132	3.35972	0.000780229
hsa-miR-151a-3p	11911.5	3.76559	1.12122	3.35848	0.000783737
hsa-let-7i-5p	36864.8	3.76898	1.12986	3.3358	0.000850532
hsa-miR-320b	3096.11	3.20327	0.961474	3.33162	0.000863407
hsa-miR-185-5p	2250.54	3.81282	1.17218	3.25275	0.00114295
hsa-miR-7-5p	1844.36	3.62887	1.12157	3.23552	0.00121419
hsa-miR-145-3p	1466.12	3.75715	1.16852	3.21529	0.00130312
hsa-miR-363-3p	2114.42	3.45363	1.13153	3.05218	0.00227184
hsa-miR-193b-5p	179.068	2.5261	0.832759	3.03341	0.00241806
hsa-let-7b-3p	147.173	3.08915	1.02995	2.99933	0.00270577
hsa-miR-98-5p	308.517	3.19822	1.0709	2.98649	0.00282197
hsa-miR-1180-3p	940.928	3.12189	1.06645	2.92735	0.00341859
hsa-miR-2110	300.78	3.01568	1.03473	2.91447	0.00356288
hsa-miR-629-5p	2006.13	2.96345	1.05878	2.79892	0.00512737
hsa-miR-100-5p	20457.7	-2.21548	0.824966	-2.68554	0.00724127
hsa-miR-7706	246.148	2.62218	0.988125	2.65369	0.00796162
hsa-miR-20b-5p	119.025	3.2147	1.21607	2.64352	0.00820492
hsa-miR-92b-3p	729.084	2.49494	0.944661	2.6411	0.00826373
hsa-miR-146b-5p	1550.51	2.72251	1.077	2.52786	0.0114759
hsa-miR-25-5p	95.2377	2.71625	1.07457	2.52776	0.0114792
hsa-let-7c-5p	6078.15	2.40075	0.958144	2.50563	0.0122234
hsa-miR-106b-5p	145.297	2.60079	1.04888	2.47959	0.0131532
hsa-miR-625-5p	832.665	2.64554	1.07522	2.46045	0.0138761
hsa-miR-143-3p	64917	2.4096	0.984853	2.44666	0.0144187
hsa-miR-625-3p	835.71	2.61425	1.0736	2.43503	0.0148906
hsa-miR-1-3p	389.477	2.61844	1.07981	2.42491	0.0153122
hsa-miR-425-5p	760.297	2.42833	1.01213	2.39923	0.0164296
hsa-miR-501-3p	339.172	2.40593	1.01855	2.36211	0.018171
hsa-miR-186-5p	2036.02	2.393	1.03502	2.31203	0.0207761
hsa-let-7d-5p	1338.62	2.08757	0.920372	2.26818	0.0233182
hsa-miR-335-3p	236.477	-2.10433	0.934364	-2.25215	0.0243126
hsa-miR-20a-5p	657.64	2.20582	0.981259	2.24795	0.0245792
hsa-miR-194-5p	765.453	2.36557	1.05415	2.24405	0.0248293
hsa-miR-193a-5p	500.17	1.88239	0.844083	2.2301	0.025741
hsa-let-7g-5p	15711.9	2.33559	1.057	2.20963	0.0271307
hsa-miR-421	68.7117	2.50276	1.13931	2.19673	0.0280399
hsa-miR-339-3p	136.479	2.03879	0.936726	2.1765	0.0295175
hsa-miR-484	2462.26	2.13528	0.981842	2.17477	0.0296471
hsa-let-7f-5p	12320.4	2.15284	0.99261	2.16887	0.0300929
hsa-miR-105-5p	53.7671	-2.97941	1.37522	-2.1665	0.0302734
hsa-miR-328-3p	1297.69	2.09586	0.976586	2.14611	0.0318641
hsa-miR-146a-5p	962.092	2.17187	1.02466	2.11961	0.0340392
hsa-miR-340-5p	205.514	2.00162	0.948667	2.10993	0.0348641
hsa-miR-144-5p	113.659	2.22443	1.0897	2.04131	0.0412198
hsa-miR-224-5p	2618.4	-1.72051	0.863589	-1.99228	0.04634
hsa-miR-511-5p	133.294	2.02952	1.0218	1.98623	0.0470075
hsa-miR-22-5p	145.771	1.86512	0.940643	1.98281	0.0473886
hsa-miR-16-2-3p	5137.9	7.20125	1.40133	5.13887	2.76e-07
hsa-miR-139-3p	663.976	5.4507	1.30343	4.1818	2.89e-05
hsa-miR-128-3p	13236	5.28782	1.27675	4.14164	3.45e-05
hsa-miR-101-3p	16629.7	5.34337	1.15434	4.62894	3.68e-06
hsa-miR-486-5p	4253.34	7.91442	1.44278	5.48553	4.12e-08
hsa-miR-92b-5p	236.884	4.89946	1.20234	4.07492	4.6e-05
hsa-miR-142-5p	4773.98	7.6129	1.3934	5.46353	4.67e-08
hsa-miR-10b-5p	25933.5	6.21855	1.36852	4.54401	5.52e-06
hsa-let-7d-3p	2862.45	5.17068	1.13797	4.54376	5.53e-06
hsa-miR-451a	244647	7.462	1.37358	5.43253	5.56e-08
hsa-miR-148a-3p	60658.7	4.39633	1.09288	4.02272	5.75e-05
hsa-let-7b-5p	105645	5.34649	1.18199	4.52329	6.09e-06
