# Supplementary material for: Diagnostic Role of Cell-Free miRNAs in Identifying Placenta Accreta Spectrum during the First-Trimester Screening
Source: Preprints.org preprint supplement (doi:10.20944/preprints202312.0752.v1), 2023-12-12
Supplement: Supplementary file 5 [file Table S4.xlsx]

## Sheet: Sheet1
Pnp versus Pnc
Gene	baseMean	log2FoldChange	lfcSE	stat	pvalue
hsa-miR-15b-3p	101.815	3.89075	1.00217	3.88231	0.00010347
hsa-let-7d-3p	3434.7	5.21955	1.35233	3.85968	0.000113536
hsa-miR-342-5p	360.833	4.63216	1.23194	3.76005	0.000169877
hsa-miR-19b-3p	331.971	4.03901	1.07561	3.75509	0.000173282
hsa-miR-16-5p	4301.75	3.79732	1.03211	3.67918	0.000233981
hsa-miR-144-3p	633.832	3.80404	1.05086	3.61992	0.000294691
hsa-miR-148a-3p	54391.2	3.99419	1.11777	3.57337	0.000352417
hsa-let-7b-5p	65256.1	4.37908	1.23741	3.5389	0.000401793
hsa-miR-182-5p	654.716	3.82973	1.0948	3.4981	0.000468589
hsa-miR-375	1138.78	4.70217	1.37274	3.42538	0.000613942
hsa-miR-10b-5p	7799.57	4.23405	1.24343	3.40514	0.00066131
hsa-miR-3615	1794.4	4.35831	1.28459	3.39276	0.000691913
hsa-miR-192-5p	2789.36	3.98039	1.17609	3.38442	0.000713289
hsa-miR-10a-5p	4905.28	3.723	1.10271	3.37623	0.000734851
hsa-miR-185-5p	2219.08	3.5297	1.0933	3.22849	0.00124447
hsa-miR-139-3p	263.407	3.7808	1.17317	3.22272	0.00126979
hsa-let-7a-3p	149.988	3.54797	1.11929	3.16984	0.00152521
hsa-miR-194-5p	1551.83	3.25309	1.02755	3.16586	0.00154624
hsa-miR-92a-3p	203894	3.99481	1.27892	3.12359	0.00178662
hsa-miR-106b-5p	191.009	2.70538	0.875613	3.0897	0.00200358
hsa-miR-151a-3p	9392.36	3.1152	1.01006	3.08417	0.00204119
hsa-miR-320d	288.204	3.21527	1.04478	3.07748	0.0020876
hsa-let-7i-5p	26400.1	2.94016	0.956627	3.07347	0.00211586
hsa-miR-2110	467.249	3.43313	1.12695	3.04638	0.00231616
hsa-miR-511-5p	292.595	3.07435	1.01715	3.02251	0.00250688
hsa-miR-7-5p	1638.5	3.17405	1.05497	3.00865	0.00262411
hsa-miR-30e-5p	2611.87	3.20023	1.06841	2.99534	0.00274142
hsa-miR-223-3p	275.22	2.3149	0.777594	2.977	0.00291079
hsa-miR-183-5p	1457.02	3.12917	1.08554	2.88259	0.0039442
hsa-miR-320c	1425.46	3.38432	1.1786	2.87148	0.00408555
hsa-miR-501-3p	668.49	3.21839	1.12902	2.85062	0.00436344
hsa-miR-146a-5p	1824.55	2.94503	1.04235	2.82537	0.00472265
hsa-miR-92b-5p	97.928	3.21074	1.14073	2.81463	0.00488329
hsa-miR-323b-3p	88.3829	2.64062	0.941667	2.8042	0.00504418
hsa-miR-760	105.323	2.96148	1.06461	2.78175	0.00540671
hsa-miR-320b	3436.96	3.06472	1.14566	2.67506	0.00747163
hsa-miR-629-5p	2133.96	2.7631	1.034	2.67226	0.00753427
hsa-miR-99a-5p	8840.26	2.39466	0.904778	2.64668	0.00812864
hsa-miR-363-3p	1435.53	2.49139	0.942466	2.64348	0.0082058
hsa-miR-1269a	376.643	-2.84478	1.08611	-2.61925	0.0088124
hsa-miR-20a-5p	736.275	1.99913	0.780481	2.56141	0.0104248
hsa-miR-98-5p	196.957	2.04845	0.811373	2.52468	0.0115805
hsa-let-7f-5p	13954.5	1.98718	0.787731	2.52267	0.0116468
hsa-miR-421	78.0524	2.33217	0.938591	2.48476	0.012964
hsa-miR-625-5p	1068.06	2.75064	1.11487	2.46722	0.0136165
hsa-miR-625-3p	1092.1	2.75033	1.11706	2.46211	0.0138122
hsa-miR-425-5p	820.423	2.17253	0.902312	2.40774	0.0160516
hsa-miR-340-5p	280.868	2.16061	0.904379	2.38905	0.016892
hsa-miR-132-5p	82.1781	2.18135	0.919829	2.37148	0.017717
hsa-miR-92b-3p	873.53	2.43545	1.06237	2.29246	0.0218792
hsa-miR-146b-5p	1425.07	2.23035	1.00308	2.22351	0.0261817
hsa-let-7g-5p	13385	1.60043	0.722748	2.21437	0.0268033
hsa-miR-1180-3p	614.351	2.00232	0.906636	2.20852	0.027208
hsa-miR-22-5p	184.849	1.8501	0.850721	2.17474	0.0296498
hsa-miR-125a-5p	33432.2	-0.999152	0.466531	-2.14166	0.0322206
hsa-miR-20b-5p	62.1374	1.57174	0.742241	2.11756	0.0342119
hsa-miR-107	887.167	1.44077	0.68609	2.09998	0.0357309
hsa-miR-484	2809.26	1.95282	0.95305	2.04903	0.0404596
hsa-miR-372-3p	370.724	-2.52678	1.25288	-2.01677	0.0437192
hsa-miR-17-5p	533.301	1.21574	0.614319	1.979	0.0478156
hsa-miR-142-5p	4980.14	7.4878	1.45451	5.14799	2.63293e-07
hsa-miR-128-3p	11870.6	4.92331	1.19112	4.13336	3.57505e-05
hsa-miR-101-3p	16193.3	5.09655	1.12006	4.55023	5.35873e-06
hsa-miR-451a	217575	7.10895	1.42045	5.00472	5.59427e-07
hsa-miR-16-2-3p	4303.67	6.76402	1.35649	4.98642	6.1508e-07
hsa-miR-486-5p	2855.91	7.13425	1.44196	4.94761	7.51314e-07
hsa-miR-25-3p	16304.1	3.86284	0.977886	3.95019	7.80883e-05
