# Supplementary material for: Diagnostic Role of Cell-Free miRNAs in Identifying Placenta Accreta Spectrum during the First-Trimester Screening
Source: Preprints.org preprint supplement (doi:10.20944/preprints202312.0752.v1), 2023-12-12
Supplement: Supplementary file 6 [file Table S5.xlsx]

## Sheet: Sheet1
Mi versus Мc
Gene	baseMean	log2FoldChange	lfcSE	stat	pvalue
hsa-miR-25-3p	2530.84	4.83055	1.24239	3.88813	0.000101021
hsa-miR-185-5p	441.014	4.28211	1.10528	3.87423	0.000106961
hsa-miR-7-5p	465.447	5.12387	1.3243	3.86911	0.000109235
hsa-miR-584-5p	69.9105	4.43103	1.16306	3.80979	0.000139082
hsa-miR-16-5p	991.365	4.42261	1.16285	3.80324	0.000142814
hsa-miR-363-3p	288.491	4.61796	1.2205	3.78367	0.000154534
hsa-miR-625-5p	35.2058	5.2054	1.41406	3.68117	0.000232165
hsa-miR-194-5p	197.639	4.95347	1.34827	3.67394	0.000238841
hsa-miR-3615	141.354	3.99756	1.10911	3.60429	0.000313007
hsa-miR-3613-5p	47.1545	5.59114	1.56087	3.58207	0.000340884
hsa-miR-144-3p	109.422	4.81198	1.34826	3.56904	0.000358295
hsa-miR-215-5p	68.2706	9.92208	2.78107	3.56772	0.000360107
hsa-miR-30e-5p	693.663	3.98874	1.12297	3.55197	0.000382366
hsa-miR-625-3p	35.6954	5.00765	1.41336	3.54308	0.000395477
hsa-miR-223-5p	107.123	7.56833	2.16553	3.49492	0.000474211
hsa-miR-15b-3p	35.3045	5.81985	1.6728	3.47912	0.000503068
hsa-miR-19b-3p	83.8224	5.39851	1.58616	3.4035	0.000665281
hsa-miR-4732-3p	34.1141	6.90843	2.03051	3.40231	0.0006682
hsa-miR-1908-5p	22.0661	5.77203	1.69677	3.40177	0.000669506
hsa-miR-375	21.7005	6.67541	1.96508	3.39701	0.000681259
hsa-miR-18a-3p	28.1355	4.40966	1.30449	3.38038	0.000723862
hsa-miR-629-5p	106.562	3.85893	1.14568	3.36823	0.000756518
hsa-miR-223-3p	37.1641	4.80141	1.43441	3.3473	0.000816026
hsa-miR-1228-5p	30.4965	7.80894	2.35423	3.31699	0.000909938
hsa-miR-19a-3p	18.0317	5.67263	1.73554	3.2685	0.00108118
hsa-miR-4732-5p	27.8629	7.63022	2.34669	3.25148	0.00114805
hsa-miR-425-5p	135.275	3.39264	1.0658	3.18319	0.00145663
hsa-miR-106b-5p	47.2185	3.64571	1.16373	3.13278	0.00173161
hsa-miR-942-5p	19.1321	6.0652	1.98098	3.06172	0.00220068
hsa-miR-17-5p	111.35	3.09524	1.01231	3.05761	0.00223111
hsa-miR-144-5p	23.119	3.99921	1.36009	2.9404	0.00327785
hsa-miR-148a-3p	1622.18	2.89545	0.986738	2.93436	0.00334233
hsa-miR-142-3p	14.0377	3.18666	1.11675	2.8535	0.00432405
hsa-miR-128-3p	942.345	2.80421	1.03048	2.72127	0.00650309
hsa-miR-501-3p	78.5943	2.63363	0.983079	2.67896	0.00738516
hsa-miR-146a-5p	333.221	2.43286	0.922122	2.63832	0.00833172
hsa-miR-20b-5p	44.692	5.35467	2.05342	2.60768	0.00911588
hsa-miR-93-5p	247.859	2.05455	0.804596	2.55352	0.0106641
hsa-miR-206	7.14488	6.66327	2.7129	2.45614	0.0140438
hsa-miR-2110	62.8451	1.53016	0.623435	2.45441	0.0141117
hsa-miR-4508	14.0487	3.06958	1.29481	2.37068	0.0177556
hsa-miR-106b-3p	290.503	1.62824	0.690527	2.35796	0.0183756
hsa-miR-483-5p	15.068	3.57328	1.52456	2.34382	0.0190876
hsa-miR-186-5p	466.558	1.92233	0.824254	2.33221	0.0196898
hsa-miR-200a-3p	11.7724	3.94236	1.7313	2.27711	0.0227798
hsa-miR-200b-3p	17.7324	2.67406	1.18711	2.25258	0.0242855
hsa-miR-484	627.531	1.46136	0.651212	2.24406	0.0248285
hsa-miR-10b-5p	2227.92	-1.19731	0.538692	-2.22262	0.0262415
hsa-miR-107	144.986	1.79397	0.813291	2.20581	0.0273973
hsa-miR-361-5p	45.5889	-1.64316	0.775172	-2.11973	0.0340286
hsa-miR-342-5p	15.7256	1.88536	0.895559	2.10523	0.035271
hsa-miR-532-5p	478.295	1.73937	0.835428	2.08201	0.0373417
hsa-miR-200c-3p	74.6962	1.80655	0.873439	2.06832	0.0386095
hsa-miR-99a-5p	4286.36	-1.81737	0.909185	-1.99891	0.0456186
hsa-miR-139-3p	26.5717	1.6112	0.806754	1.99714	0.0458102
hsa-miR-505-5p	22.6156	1.82198	0.927341	1.96473	0.049445
hsa-miR-182-5p	83.9533	6.02524	1.37956	4.36749	1.26e-05
hsa-miR-183-5p	82.2434	5.87552	1.34726	4.3611	1.29e-05
hsa-miR-451a	20981.2	6.90073	1.43794	4.79904	1.59e-06
hsa-miR-101-3p	2075.41	5.08128	1.19361	4.25706	2.07e-05
hsa-miR-16-2-3p	1407.14	7.26092	1.44673	5.01886	5.2e-07
hsa-miR-142-5p	996.279	7.91094	1.45452	5.43886	5.36e-08
hsa-miR-486-5p	271.679	7.18889	1.43928	4.99477	5.89e-07
hsa-miR-192-5p	463.436	6.66563	1.47291	4.52549	6.03e-06
hsa-miR-20a-5p	266.176	4.78003	1.21409	3.93714	8.25e-05
hsa-miR-92a-3p	37528.4	4.44744	1.13022	3.93504	8.32e-05

## Sheet: Sheet2
mirnaid	refseqid	genesymbol	duplex	start	end	bindingp	energy	seed	accessibility	au	phylopstem	phylopflank	me	number_of_pairings	binding_region_length	longest_consecutive_pairings	position	validated	TargetScan	miRDB
hsa-miR-101-3p	NM_001127671	LIFR	TACAGTACTGTGATAACTGAA#CAGTTGTGATGTGCTGTAC#((((((((.((.(((((((..#))))))).)))))))))).	9796	9815	0.9692307692307692	-19.8	1	0.001381917	0.721	0.9263299124999997	1.5993239859999997	-8.340767414043784	17	19	10	3UTR	MIRT027384	0	1
hsa-miR-101-3p	NM_001354909	PSPC1	TACAGTACTGTGATAACTGAA#AGTATTCCATAGTACTGTGA#((((((((((((.........#.)))))))))))).	1999	2019	1.0	-17.4	1	0.003846147	0.735	5.078940666666667	4.2967754437500005	-7.052043616942562	12	14	12	3UTR	MIRT470123	0	1
hsa-miR-101-3p	XM_047440105	GMEB2	TACAGTACTGTGATAACTGAA#TTACATTTTTGTTTGCTGTTGTCACAGTCAGCTGG#..(((((((((((((((....#.)))))))))))..)))).	3587	3622	1.0	-20.2	1	0.001602992	0.603	0.0	0.0	-4.95700071937229	15	19	11	3UTR	MIRT027243	0	0
hsa-miR-101-3p	XM_047450140	GRSF1	TACAGTACTGTGATAACTGAA#CAGCTAAGATGCGAAATCACTGTACTGTAG#((((((((.(((((.......#.))))).)))))))).	2467	2497	1.0	-17.5	1	0.01295306	0.632	0.0	0.0	-5.962462745001676	13	16	8	3UTR	MIRT734588	0	1
hsa-miR-101-3p	NM_181890	UBE2D3	TACAGTACTGTGATAACTGAA#TCAGTTGTCACAT#........((((((((((((.#)))))))))))).	1134	1147	1.0	-17.4	0	0.0008671767	0.529	0.23274558333333326	0.4320728062499999	-19.423879868695398	12	13	12	3UTR	MIRT027292	0	0
hsa-miR-101-3p	NM_181891	UBE2D3	TACAGTACTGTGATAACTGAA#TCAGTTGTCACAT#........((((((((((((.#)))))))))))).	1078	1091	1.0	-17.4	0	0.0008671767	0.529	0.0	0.0	-19.423879868695398	12	13	12	3UTR	MIRT027292	0	0
hsa-miR-101-3p	NM_181893	UBE2D3	TACAGTACTGTGATAACTGAA#TCAGTTGTCACAT#........((((((((((((.#)))))))))))).	982	995	1.0	-17.4	0	0.0008671767	0.529	0.17723122500000002	0.44927520749999994	-19.423879868695398	12	13	12	3UTR	MIRT027292	0	0
hsa-miR-101-3p	NM_015646	RAP1B	TACAGTACTGTGATAACTGAA#GTCACAGACTGTAT#((((((.(((((((.......#))))))))))))).	12136	12150	1.0	-17.0	0	0.003434718	0.809	-0.2605917142857143	0.30803964000000006	-6.449759621627232	13	14	13	3UTR	MIRT188232	0	1
hsa-miR-101-3p	NM_001251917	RAP1B	TACAGTACTGTGATAACTGAA#GTCACAGACTGTAT#((((((.(((((((.......#))))))))))))).	12010	12024	1.0	-17.0	0	0.003434718	0.809	-0.2605917142857143	0.30803964000000006	-6.449759621627232	13	14	13	3UTR	MIRT188232	0	1
hsa-miR-101-3p	NM_001251918	RAP1B	TACAGTACTGTGATAACTGAA#GTCACAGACTGTAT#((((((.(((((((.......#))))))))))))).	12001	12015	1.0	-17.0	0	0.003434718	0.809	-0.2605917142857143	0.30803964000000006	-6.449759621627232	13	14	13	3UTR	MIRT188232	0	1
hsa-miR-101-3p	NM_001251921	RAP1B	TACAGTACTGTGATAACTGAA#GTCACAGACTGTAT#((((((.(((((((.......#))))))))))))).	12070	12084	1.0	-17.0	0	0.003434718	0.809	-0.2605917142857143	0.30803964000000006	-6.449759621627232	13	14	13	3UTR	MIRT188232	0	1
hsa-miR-101-3p	NM_001251922	RAP1B	TACAGTACTGTGATAACTGAA#GTCACAGACTGTAT#((((((.(((((((.......#))))))))))))).	11986	12000	1.0	-17.0	0	0.003434718	0.809	-0.2605917142857143	0.30803964000000006	-6.449759621627232	13	14	13	3UTR	MIRT188232	0	1
hsa-miR-101-3p	NM_001278357	FRS2	TACAGTACTGTGATAACTGAA#TTCAGTGTTCACAGTATGTGG#((((.((((((((..((((((#))))))..)))))))))))).	2203	2224	1.0	-21.8	0	0.001193982	0.574	0.0	0.0	-9.648901098785178	18	21	12	3UTR	MIRT027362	0	0
hsa-miR-101-3p	NM_001282985	TRIB1	TACAGTACTGTGATAACTGAA#TCAGTAACTGTCTTGGACAGTGCTGA#..((((((((((((((((((.#)))))...))))....))))))))).	2242	2268	1.0	-18.9	1	0.0001700775	0.632	0.43373620800000007	1.1595658187500002	-4.95700071937229	18	26	9	3UTR	MIRT735800	0	1
hsa-miR-101-3p	NM_021960	MCL1	TACAGTACTGTGATAACTGAA#CTCAGTACTGTAC#((((((((((.(.........#).)))))))))).	1590	1603	1.0	-14.7	1	0.03728619	0.603	0.41531321	1.0008134325	-9.876818092352913	11	13	10	3UTR	MIRT003921	0	1
hsa-miR-101-3p	NM_022041	GAN	TACAGTACTGTGATAACTGAA#TTGTAAATTACAGTTATTTCAGTATTGTAA#((((((((((.((((((((..#.)))))))).)))))))))).	4479	4509	1.0	-22.9	1	0.00503316	0.735	0.682218	1.17215486	-6.7623489216120145	18	21	10	3UTR	MIRT761071	0	0
hsa-miR-101-3p	NM_022347	TOR1AIP2	TACAGTACTGTGATAACTGAA#CAGAATACTCATAGTACTGC#..(((((((((((...(((..#))).....))))))))))).	4358	4378	1.0	-17.0	1	0.01345806	0.632	0.6824364818181818	0.17778288750000001	-6.782339277446944	14	20	11	3UTR	MIRT475275	0	0
hsa-miR-101-3p	NM_025195	TRIB1	TACAGTACTGTGATAACTGAA#TCAGTAACTGTCTTGGACAGTGCTGA#..((((((((((((((((((.#)))))...))))....))))))))).	3031	3057	1.0	-18.9	1	0.0001700775	0.632	0.43373620800000007	1.1595658187500002	-4.95700071937229	18	26	9	3UTR	MIRT735800	0	1
hsa-miR-101-3p	NM_001170765	LCOR	TACAGTACTGTGATAACTGAA#TTCAGAGTCTTAGGTACTGTAA#(((((((((..(((..(((((#))))).)))...))))))))).	7921	7943	1.0	-18.1	1	0.01677103	0.779	3.0130099999999995	2.7891166249999992	-8.973354030494443	17	22	9	3UTR	MIRT027388	0	1
hsa-miR-101-3p	NM_001170766	LCOR	TACAGTACTGTGATAACTGAA#TTCAGAGTCTTAGGTACTGTAA#(((((((((..(((..(((((#))))).)))...))))))))).	5344	5366	1.0	-18.1	1	0.01677103	0.779	3.0130099999999995	2.7891166249999992	-8.973354030494443	17	22	9	3UTR	MIRT027388	0	1
hsa-miR-101-3p	NM_001172705	EIF4G2	TACAGTACTGTGATAACTGAA#CAGTTATCATAGGCTGTT#.(((((.((((((((((((..#))))))))))))))))).	3558	3576	1.0	-22.3	0	0.000554487	0.603	1.73789925	2.3705504302500002	-5.337011372228436	17	18	17	3UTR	MIRT558189	0	0
hsa-miR-101-3p	NM_005573	LMNB1	TACAGTACTGTGATAACTGAA#TTCATTATTCTCTGCTATATATAAAACGGTGCTGTGA#(((((((((((..........#.))))))))))).	2516	2553	1.0	-15.6	1	0.01513164	0.662	1.1563629454545454	1.5862883399999994	-10.39884692653892	11	13	11	3UTR	MIRT027335	0	1
hsa-miR-101-3p	NM_012384	GMEB2	TACAGTACTGTGATAACTGAA#TTACATTTTTGTTTGCTGTTGTCACAGTCAGCTGG#..(((((((((((((((....#.)))))))))))..)))).	3348	3383	1.0	-20.2	1	0.001602992	0.603	2.48147	2.9220971725000005	-4.95700071937229	15	19	11	3UTR	MIRT027243	0	0
hsa-miR-101-3p	NM_001418	EIF4G2	TACAGTACTGTGATAACTGAA#CAGTTATCATAGGCTGTT#.(((((.((((((((((((..#))))))))))))))))).	3332	3350	1.0	-22.3	0	0.000554487	0.603	0.0037169333333333388	0.4117288189999999	-5.337011372228436	17	18	17	3UTR	MIRT558189	0	0
hsa-miR-101-3p	NM_001999	FBN2	TACAGTACTGTGATAACTGAA#TCATTCTTACCCAGGGTGCGCTGCGTCCTCATGGTACTGTAG#(((((((((((((..((....#.))..))))))))))))).	10236	10278	1.0	-18.8	1	0.01048825	0.441	0.0	0.0	-5.529863923972706	15	19	13	3UTR	MIRT004012	0	1
hsa-miR-101-3p	NM_002092	GRSF1	TACAGTACTGTGATAACTGAA#CAGCTAAGATGCGAAATCACTGTACTGTAG#((((((((.(((((.......#.))))).)))))))).	2802	2832	1.0	-17.5	1	0.01295306	0.632	0.0	0.0	-5.962462745001676	13	16	8	3UTR	MIRT734588	0	1
hsa-miR-101-3p	NM_002310	LIFR	TACAGTACTGTGATAACTGAA#TTAACAATTTTATCATAGTATTGTC#.(((((((((((((((.....#.))))))))))))))).	10032	10057	1.0	-18.2	1	0.05123056	0.809	0.0	0.0	-3.793324837357118	15	17	15	3UTR	MIRT027384	0	1
hsa-miR-101-3p	NM_004612	TGFBR1	TACAGTACTGTGATAACTGAA#TCAGTTACTCAAATGGTACTGTAT#(((((((((.((((((((((.#))))))).)))...))))))))).	5582	5606	1.0	-20.9	1	0.003535659	0.662	0.0	0.0	-5.180080914529843	19	24	9	3UTR	MIRT027382	0	1
hsa-miR-101-3p	NM_004755	RPS6KA5	TACAGTACTGTGATAACTGAA#CAGATGTCAAAGTGCTGTAT#(((((((((.(((((.(((..#))).))))).))))))))).	18596	18616	1.0	-20.6	1	0.0005821321	0.574	0.0	0.0	-5.413129994833456	17	20	9	3UTR	MIRT027312	0	0
hsa-miR-101-3p	NM_203399	STMN1	TACAGTACTGTGATAACTGAA#TTCAGTACACTTGGTGTACTGGGTTAATGGCTAGTACTGTAT#(((((((((((.((((((.(.#.).))))).).)).))))))))).	856	898	1.0	-18.0	1	0.01542888	0.618	3.181380666666667	3.03563355125	-7.284377755798021	18	24	9	3UTR	MIRT006149	0	1
hsa-miR-101-3p	NM_205842	NCKAP1	TACAGTACTGTGATAACTGAA#TAGTTGTCACTATCTGTC#.((((....((((((((((..#))))))))))...)))).	5279	5297	1.0	-16.4	0	0.01847916	0.676	0.4487146000000001	0.08726959875000001	-10.607994720847877	14	18	10	3UTR	MIRT472408	0	0
hsa-miR-101-3p	XM_006712200	NCKAP1	TACAGTACTGTGATAACTGAA#TAGTTGTCACTATCTGTC#.((((....((((((((((..#))))))))))...)))).	5273	5291	1.0	-16.4	0	0.01847916	0.676	0.0	0.0	-10.607994720847877	14	18	10	3UTR	MIRT472408	0	0
hsa-miR-101-3p	XM_006712201	NCKAP1	TACAGTACTGTGATAACTGAA#TAGTTGTCACTATCTGTC#.((((....((((((((((..#))))))))))...)))).	5255	5273	1.0	-16.4	0	0.01847916	0.676	0.0	0.0	-10.607994720847877	14	18	10	3UTR	MIRT472408	0	0
hsa-miR-101-3p	XM_006723776	GMEB2	TACAGTACTGTGATAACTGAA#TTACATTTTTGTTTGCTGTTGTCACAGTCAGCTGG#..(((((((((((((((....#.)))))))))))..)))).	3000	3035	1.0	-20.2	1	0.001602992	0.603	0.0	0.0	-4.95700071937229	15	19	11	3UTR	MIRT027243	0	0
hsa-miR-101-3p	XM_011518948	TGFBR1	TACAGTACTGTGATAACTGAA#TCAGTTACTCAAATGGTACTGTAT#(((((((((.((((((((((.#))))))).)))...))))))))).	22080	22104	1.0	-20.9	1	0.003535659	0.662	0.0	0.0	-5.180080914529843	19	24	9	3UTR	MIRT027382	0	1
hsa-miR-101-3p	XM_011518949	TGFBR1	TACAGTACTGTGATAACTGAA#TCAGTTACTCAAATGGTACTGTAT#(((((((((.((((((((((.#))))))).)))...))))))))).	5461	5485	1.0	-20.9	1	0.003535659	0.662	0.0	0.0	-5.180080914529843	19	24	9	3UTR	MIRT027382	0	1
hsa-miR-101-3p	NM_001106	ACVR2B	TACAGTACTGTGATAACTGAA#CATTTGTCCTTGAATCTGAATAACTTTATACAGTACTGTAA#((((((((((((.........#.)))))))))))).	10630	10671	1.0	-16.8	1	0.003387569	0.721	1.6490299166666669	1.5202939175	-7.052043616942562	12	14	12	3UTR	MIRT027313	0	1
hsa-miR-101-3p	NM_001127671	LIFR	TACAGTACTGTGATAACTGAA#TTAACAATTTTATCATAGTATTGTC#.(((((((((((((((.....#.))))))))))))))).	10200	10225	1.0	-18.2	1	0.05123056	0.809	-0.004255113333333356	0.4237601350000001	-3.793324837357118	15	17	15	3UTR	MIRT027384	0	1
hsa-miR-101-3p	NM_001130916	TGFBR1	TACAGTACTGTGATAACTGAA#TCAGTTACTCAAATGGTACTGTAT#(((((((((.((((((((((.#))))))).)))...))))))))).	5351	5375	1.0	-20.9	1	0.003535659	0.662	2.129039363636364	2.284560525	-5.180080914529843	19	24	9	3UTR	MIRT027382	0	1
hsa-miR-101-3p	NM_032440	LCOR	TACAGTACTGTGATAACTGAA#TTCAGAGTCTTAGGTACTGTAA#(((((((((..(((..(((((#))))).)))...))))))))).	7989	8011	1.0	-18.1	1	0.01677103	0.779	3.0130099999999995	2.7891166249999992	-8.973354030494443	17	22	9	3UTR	MIRT027388	0	1
hsa-miR-101-3p	NM_080927	DCBLD2	TACAGTACTGTGATAACTGAA#CAATAACGCACGGTACTGTT#.(((((((((((.........#.))))))))))).	3059	3079	1.0	-17.1	1	0.006455196	0.574	1.270330081818182	0.95260109875	-6.907794008098015	11	13	11	3UTR	MIRT735793	0	1
hsa-miR-101-3p	NM_144684	ZNF480	TACAGTACTGTGATAACTGAA#CATAGTACTGG#..((((((((((.........#)))))))))).	2749	2760	1.0	-15.1	1	0.01785393	0.544	-0.06740471379999999	-0.2489059956500001	-8.071469890113187	10	11	10	3UTR	MIRT444392	0	0
hsa-miR-101-3p	NM_001297624	ZNF480	TACAGTACTGTGATAACTGAA#CATAGTACTGG#..((((((((((.........#)))))))))).	2620	2631	1.0	-15.1	1	0.01785393	0.544	-0.06740471379999999	-0.2489059956500001	-8.071469890113187	10	11	10	3UTR	MIRT444392	0	0
hsa-miR-101-3p	NM_001297625	ZNF480	TACAGTACTGTGATAACTGAA#CATAGTACTGG#..((((((((((.........#)))))))))).	2622	2633	1.0	-15.1	1	0.01785393	0.544	-0.06740471379999999	-0.2489059956500001	-8.071469890113187	10	11	10	3UTR	MIRT444392	0	0
hsa-miR-101-3p	NM_001306210	TGFBR1	TACAGTACTGTGATAACTGAA#TCAGTTACTCAAATGGTACTGTAT#(((((((((.((((((((((.#))))))).)))...))))))))).	5594	5618	1.0	-20.9	1	0.003535659	0.662	2.129039363636364	2.284560525	-5.180080914529843	19	24	9	3UTR	MIRT027382	0	1
hsa-miR-101-3p	NM_001322237	RPS6KA5	TACAGTACTGTGATAACTGAA#CAGATGTCAAAGTGCTGTAT#(((((((((.(((((.(((..#))).))))).))))))))).	18393	18413	1.0	-20.6	1	0.0005821321	0.574	0.26934211111111117	0.021887063750000012	-5.413129994833456	17	20	9	3UTR	MIRT027312	0	0
hsa-miR-101-3p	NM_001010942	RAP1B	TACAGTACTGTGATAACTGAA#GTCACAGACTGTAT#((((((.(((((((.......#))))))))))))).	12127	12141	1.0	-17.0	0	0.003434718	0.809	0.0	0.0	-6.449759621627232	13	14	13	3UTR	MIRT188232	0	1
hsa-miR-106b-3p	XM_047416665	TENT4A	CCGCACTGTGGGTACTTGCTGC#CGGGTCTGGCAGTGCGT#.((((((((.((.(((((....#))))))).)))))))).	3996	4013	0.9615384615384616	-21.7	1	2.346477e-06	0.471	0.0	0.0	-6.32496191835154	15	17	8	3UTR	MIRT038569	0	0
hsa-miR-106b-3p	NM_001366022	TET3	CCGCACTGTGGGTACTTGCTGC#GCAGCAGGTTCTCACAAAATAACTGGTGCT#..((((((((((.(((((((((#))))))))).)))))).........)))).	8420	8450	1.0	-26.5	1	0.009534568	0.559	0.0	0.0	-6.246131332038532	19	30	9	3UTR	MIRT565407	0	0
hsa-miR-106b-3p	NM_177401	MIDN	CCGCACTGTGGGTACTTGCTGC#GGGGAGGGGCCGCAGTGCGC#.((((((((((.(.(((.((..#)).))).).)))))))))).	2361	2381	1.0	-25.4	1	2.416279e-05	0.382	1.9876337000000004	1.6036478549999997	-7.996968064473879	16	20	10	3UTR	MIRT735832	0	0
hsa-miR-106b-3p	NM_181054	HIF1A	CCGCACTGTGGGTACTTGCTGC#GCAGCAGAAACCTACTGCAGGG#(((((..((((((..(((((((#)))))))..))))))))).)).	2587	2609	1.0	-22.7	0	0.001117972	0.559	2.0312405714285715	4.8084332624999995	-8.974509220037072	18	22	9	3UTR	MIRT038587	0	0
hsa-miR-106b-3p	NM_001388306	MIDN	CCGCACTGTGGGTACTTGCTGC#GGGGAGGGGCCGCAGTGCGC#.((((((((((.(.(((.((..#)).))).).)))))))))).	2490	2510	1.0	-25.4	1	2.416279e-05	0.382	0.0	0.0	-7.996968064473879	16	20	10	3UTR	MIRT735832	0	0
hsa-miR-106b-3p	NM_001388474	MIDN	CCGCACTGTGGGTACTTGCTGC#GGGGAGGGGCCGCAGTGCGC#.((((((((((.(.(((.((..#)).))).).)))))))))).	2285	2305	1.0	-25.4	1	2.416279e-05	0.382	0.0	0.0	-7.996968064473879	16	20	10	3UTR	MIRT735832	0	0
hsa-miR-106b-3p	NM_014863	CHST15	CCGCACTGTGGGTACTTGCTGC#GCAGCGTGTGCAGAGGCCCAGTGGTCAGCACCACCTACCATACAGAACGCAGCCAGCCGCCTGGTGTGGG#(((((((..((((.((.(((((#.))))).))..))))))))))).	3262	3332	1.0	-24.1	1	7.20725e-07	0.338	0.2255125	0.8571800350000001	-8.164438951148465	18	23	11	3UTR	MIRT610919	0	0
hsa-miR-106b-3p	NM_001256799	GAPDH	CCGCACTGTGGGTACTTGCTGC#CAGCAAGAGCACAAGAGGAAGAGAGAGACCCTCACTGCTGGG#(((((.((.((((.(((((((.#)))))))....................)))).)).))).)).	1205	1247	1.0	-19.8	0	8.494926e-07	0.397	1.9239587857142857	2.2574213125000004	-7.75176278316088	18	42	7	3UTR	MIRT038579	0	0
hsa-miR-106b-3p	NM_001260506	RPS3	CCGCACTGTGGGTACTTGCTGC#CAGTAAGACCCAAGCAGAGCC#..((.((((((((.(((((((.#)))))))))))..)))).)).	1030	1051	1.0	-21.4	0	0.02756707	0.588	0.0001836750000000137	-0.394388146875	-9.932877811705168	17	21	11	3UTR	MIRT038586	0	0
hsa-miR-106b-3p	NM_001267700	PHB2	CCGCACTGTGGGTACTTGCTGC#CAGTGATTTCCTACAGTGTT#..((((((((((...((((((.#))))))...)))))))))).	1233	1253	1.0	-21.6	1	0.02149005	0.485	3.64242	0.21016039000000003	-7.838420809809573	16	20	10	3UTR	MIRT512380	0	0
hsa-miR-106b-3p	NM_001287491	TET3	CCGCACTGTGGGTACTTGCTGC#GCAGCAGGTTCTCACAAAATAACTGGTGCT#..((((((((((.(((((((((#))))))))).)))))).........)))).	9285	9315	1.0	-26.5	1	0.009534568	0.559	0.0	0.0	-6.246131332038532	19	30	9	3UTR	MIRT565407	0	0
hsa-miR-106b-3p	NM_020441	CORO1B	CCGCACTGTGGGTACTTGCTGC#GCAGCAATGTGGAGAGGCGTCCAGCCCAGAGCAGGTCCCCGTGCGGG#((((((.(.(((.(((((((..#.))))))))))))))))).	3959	4006	1.0	-27.1	0	2.319896e-06	0.324	3.3744675714285712	3.530761688749999	-7.82678125198499	17	19	17	3UTR	MIRT038589	0	0
hsa-miR-106b-3p	NM_006830	UQCR11	CCGCACTGTGGGTACTTGCTGC#CTCATAAGTAGTATCTGCAGTGTGT#.((((((((((((((.((((..#.)))))))))))))))))).	570	595	1.0	-24.5	1	0.0001679475	0.559	-0.10848450714285719	-0.5782147324999998	-4.026373917660731	18	20	18	3UTR	MIRT038594	0	0
hsa-miR-106b-3p	NM_053043	RBM33	CCGCACTGTGGGTACTTGCTGC#GTGGCGATTCAAAGATGCCGGCGTCCCGCAGTGTGCGG#((((((((((((.((..((((.#.))))))))))))))))).).	9592	9630	1.0	-25.2	1	1.090323e-06	0.412	0.34088141538461536	0.5538522412499997	-5.459754139171521	18	21	17	3UTR	MIRT038573	0	0
hsa-miR-106b-3p	NM_001005	RPS3	CCGCACTGTGGGTACTTGCTGC#CAGTAAGACCCAAGCAGAGCC#..((.((((((((.(((((((.#)))))))))))..)))).)).	951	972	1.0	-21.4	0	0.02756707	0.588	0.0	0.0	-9.932877811705168	17	21	11	3UTR	MIRT038586	0	0
hsa-miR-106b-3p	NM_001018070	CORO1B	CCGCACTGTGGGTACTTGCTGC#GCAGCAATGTGGAGAGGCGTCCAGCCCAGAGCAGGTCCCCGTGCGGG#((((((.(.(((.(((((((..#.))))))))))))))))).	4005	4052	1.0	-27.1	0	2.319896e-06	0.324	0.0	0.0	-7.82678125198499	17	19	17	3UTR	MIRT038589	0	0
hsa-miR-106b-5p	NM_001330619	IQSEC1	TAAAGTGCTGACAGTGCAGAT#ATCTGCAAACCAAGCACTTTGT#(((((((((.....(((((((#))))))).....))))))))).	5260	5282	0.9538461538461539	-21.3	1	0.01115716	0.574	4.8037083222222225	5.799036735	-13.4976292297232	16	22	9	3UTR	MIRT440431	1	1
hsa-miR-106b-5p	NM_014363	SACS	TAAAGTGCTGACAGTGCAGAT#TGCACTGAGTGCACTTTAC#((((((((...(((((((...#)))))))...)))))))).	14921	14940	0.9538461538461539	-21.7	1	0.008256993	0.721	1.0910273750000001	1.3321321667500001	-9.06124504818596	15	19	8	3UTR	MIRT439717	1	1
hsa-miR-106b-5p	NM_001134382	IQSEC1	TAAAGTGCTGACAGTGCAGAT#ATCTGCAAACCAAGCACTTTGT#(((((((((.....(((((((#))))))).....))))))))).	5617	5639	0.9538461538461539	-21.3	1	0.01115716	0.574	4.633602222222222	5.139259105000001	-13.4976292297232	16	22	9	3UTR	MIRT440431	1	1
hsa-miR-106b-5p	NM_001143976	WEE1	TAAAGTGCTGACAGTGCAGAT#ATCCCACTGGGAGCACTTTGT#(((((((((..(((((..(((#))).)))))..))))))))).	2521	2542	0.9551282051282051	-20.0	1	0.0006998869	0.574	6.297171111111111	2.5227233487499996	-8.004855389940193	17	21	9	3UTR	MIRT005868	1	1
hsa-miR-106b-5p	NM_017526	LEPROT	TAAAGTGCTGACAGTGCAGAT#ATCTGTATACATGTGCACATGCGGCATTTTAC#((((((((((.(((((((.((#.)).))))).)))))))))))).	499	531	0.9615384615384616	-21.4	1	0.001016769	0.691	0.35541181	0.5997252125	-6.7623489216120145	19	23	12	3UTR	MIRT556598	0	0
hsa-miR-106b-5p	NM_001198681	LEPROT	TAAAGTGCTGACAGTGCAGAT#ATCTGTATACATGTGCACATGCGGCATTTTAC#((((((((((.(((((((.((#.)).))))).)))))))))))).	631	663	0.9615384615384616	-21.4	1	0.001016769	0.691	1.1912783	0.43827089250000006	-6.7623489216120145	19	23	12	3UTR	MIRT556598	0	0
hsa-miR-106b-5p	NM_021903	GABBR1	TAAAGTGCTGACAGTGCAGAT#CTGCACATTGTTATGCACTTTT#.((((((((((((((((((..#))))))..))))).))))))).	3674	3696	0.9615384615384616	-22.1	1	0.04838256	0.515	4.067676952380952	2.735371732499999	-3.793324837357118	18	22	7	3UTR	MIRT440596	0	0
hsa-miR-106b-5p	NM_006578	GNB5	TAAAGTGCTGACAGTGCAGAT#GTACTGTGCTAAGCACTTTGT#(((((((((((((((((....#))))))).)..))))))))).	8367	8388	0.9615384615384616	-19.8	1	6.72438e-05	0.588	5.576747300000001	5.535341561250002	-3.937574446201665	17	21	9	3UTR	MIRT696204	1	1
hsa-miR-106b-5p	NM_012335	MYO1F	TAAAGTGCTGACAGTGCAGAT#GTCCTGTGCTGTTGGCAA#.....((((((((((((((..#.)))))))))))))).	3734	3752	0.9615384615384616	-21.6	0	8.493007e-05	0.441	4.538807357142857	5.609440048750001	-13.6655996434504	14	16	14	3UTR	MIRT684805	0	0
hsa-miR-106b-5p	NM_014041	SPCS1	TAAAGTGCTGACAGTGCAGAT#TGCATTGTTAAGTACTTA#..((((((((((((((((...#)))))))))).)))))).	1079	1097	0.9615384615384616	-19.9	1	0.005852528	0.676	-0.00634427647058825	0.14702689000000002	-4.95700071937229	16	18	10	3UTR	MIRT641712	0	0
hsa-miR-106b-5p	NM_001099694	ZNF578	TAAAGTGCTGACAGTGCAGAT#CTGTACTGCAGCGA#.....(((((.((((((((..#))))))))))))).	3871	3885	0.9615384615384616	-20.0	0	5.501012e-05	0.485	-0.312902375	-0.18066234125	-16.49037411886075	13	14	13	3UTR	MIRT691002	0	0
hsa-miR-106b-5p	NM_001031732	YTHDC1	TAAAGTGCTGACAGTGCAGAT#ATCTGCATTGTGGTAGAGAGGAAAAAGTACTTTT#.((((((((.(((((((((((#))))))))))).).............))))))).	4073	4107	0.9615384615384616	-19.5	1	0.05917791	0.662	0.0	0.0	-5.035831305685297	19	34	11	3UTR	MIRT710427	0	1
hsa-miR-106b-5p	XM_011536563	ATG14	TAAAGTGCTGACAGTGCAGAT#CTGCTCTGTCGTAGTTTGT#((((.(((.(((((.((((..#)))).)))))))).)))).	1792	1811	0.9692307692307692	-19.2	0	0.0009107632	0.603	0.0	0.0	-9.848450839510535	16	19	8	3UTR	MIRT440390	1	1
hsa-miR-106b-5p	NM_001316973	LZIC	TAAAGTGCTGACAGTGCAGAT#GCATGTATCAGTACTTTAT#(((((((((((..((((....#))))...))))))))))).	2620	2639	0.9743589743589743	-19.2	1	0.07888371	0.735	-0.3232292272727273	-0.30931914124999993	-8.573508368464264	15	19	11	3UTR	MIRT506689	1	1
hsa-miR-106b-5p	NM_001190738	NFIB	TAAAGTGCTGACAGTGCAGAT#GTCTCCAACCATCAGTTCCGTGGCACTGTTCAGCCTTTGT#(((((.(((((((((((....#.))))))).))))))))).	5353	5393	0.9807692307692307	-22.1	0	0.0004924532	0.426	2.7216116666666665	4.237194649999998	-5.838533207394711	16	19	9	3UTR	MIRT472286	1	1
hsa-miR-106b-5p	NM_003417	ZNF264	TAAAGTGCTGACAGTGCAGAT#TCTGCTCTGATCGGTATTA#...(((((((((((.(((((.#))))).))).)))))))).	4854	4873	0.9807692307692307	-20.6	0	0.02542114	0.662	0.0	0.0	-7.249989753929374	16	19	8	3UTR	MIRT200926	0	1
hsa-miR-106b-5p	NM_032486	DCTN5	TAAAGTGCTGACAGTGCAGAT#CTGCCTTTCCATGTGCTGTGAGTGCTTTGA#(((((((((.((((((((...#.)))))))).))))))))).	9212	9242	0.9807692307692307	-22.1	1	0.0001563518	0.485	-0.3690052222222222	-0.027678829375000033	-5.180080914529843	17	20	9	3UTR	MIRT685213	0	0
hsa-miR-106b-5p	NM_001331029	PPP1R12B	TAAAGTGCTGACAGTGCAGAT#CTGCATTGAGGCGCTC#...((((((..((((((((..#)))))))).)))))).	3811	3827	1.0	-21.3	0	0.0007301868	0.515	0.062267874999999986	0.194229795	-10.581821137417268	14	16	8	3UTR	MIRT132403	0	1
hsa-miR-106b-5p	NM_001345917	WDR53	TAAAGTGCTGACAGTGCAGAT#TCTGTCTGTTGAGCACTTA#..((((((((((((.(((((.#)))))))))).))))))).	1988	2007	1.0	-21.0	1	0.0003826041	0.603	0.19704933846153855	0.007924368750000021	-5.692450279622925	17	19	10	3UTR	MIRT614269	0	0
hsa-miR-106b-5p	NM_001348331	TRIP12	TAAAGTGCTGACAGTGCAGAT#GTCTGCCTGTTACAGCAA#.....(((((((((.((((((#))))))))))..))))).	6180	6198	1.0	-19.4	0	0.002941425	0.662	4.141914545454545	4.9479132974999995	-14.401049203701035	15	18	10	3UTR	MIRT044332	0	0
hsa-miR-106b-5p	NM_001352570	ACBD5	TAAAGTGCTGACAGTGCAGAT#ATCACACCACTGCATGCACTGCAGCCTG#...((.((((.(((((((...#.))))))))))))).	2722	2750	1.0	-19.6	0	0.0003809779	0.456	0.0	0.0	-11.240273430282135	13	15	13	3UTR	MIRT441294	1	1
hsa-miR-106b-5p	NM_001357857	ATXN1	TAAAGTGCTGACAGTGCAGAT#GTTTGACATTTTCAGCACTTC#..(((((((((.(((((((((#))))).)))).))))))))).	8920	8941	1.0	-20.1	1	0.07507923	0.676	3.05808183	2.4434172075000005	-8.303804028968646	18	21	9	3UTR	MIRT441140	1	1
hsa-miR-106b-5p	NM_001357857	ATXN1	TAAAGTGCTGACAGTGCAGAT#GTCCTGTCAGTATTTG#..((((((((((((.((....#)).)))))))))))).	9961	9977	1.0	-18.9	1	0.001082048	0.574	1.1566453166666668	0.8433843449999999	-5.692450279622925	14	16	12	3UTR	MIRT441140	1	1
hsa-miR-106b-5p	NM_001363661	HMGB1	TAAAGTGCTGACAGTGCAGAT#CTGCGCTGAACATCTGTACA#....((((.((((((((((..#))))))))....)).)))).	5308	5328	1.0	-17.8	0	0.02627698	0.574	0.0	0.0	-10.602952126883691	14	20	8	3UTR	MIRT511558	0	0
hsa-miR-106b-5p	NM_001365045	ADAR	TAAAGTGCTGACAGTGCAGAT#TGTGCATTCTTTGAATAGTCACTCGTAAAAACTGTCAGTGCTTG#..(((((((((((((......#.))))))))))))).	5102	5146	1.0	-20.0	1	0.007690984	0.632	0.0	0.0	-5.1900497996759025	13	15	13	3UTR	MIRT482480	1	0
hsa-miR-106b-5p	NM_001365046	ADAR	TAAAGTGCTGACAGTGCAGAT#TGTGCATTCTTTGAATAGTCACTCGTAAAAACTGTCAGTGCTTG#..(((((((((((((......#.))))))))))))).	4966	5010	1.0	-20.0	1	0.007690984	0.632	0.0	0.0	-5.1900497996759025	13	15	13	3UTR	MIRT482480	1	0
hsa-miR-106b-5p	NM_001365048	ADAR	TAAAGTGCTGACAGTGCAGAT#TGTGCATTCTTTGAATAGTCACTCGTAAAAACTGTCAGTGCTTG#..(((((((((((((......#.))))))))))))).	5105	5149	1.0	-20.0	1	0.007690984	0.632	0.0	0.0	-5.1900497996759025	13	15	13	3UTR	MIRT482480	1	0
hsa-miR-106b-5p	NM_001369389	PRKAR1A	TAAAGTGCTGACAGTGCAGAT#CTGTATTTCAGTATTTTC#.((((((((((.(((((((..#))))))))))))))))).	2730	2748	1.0	-17.7	1	0.01429646	0.691	4.0501239	4.2243471249999995	-7.140128146953473	17	18	17	3UTR	MIRT535035	0	0
hsa-miR-106b-5p	NM_001369390	PRKAR1A	TAAAGTGCTGACAGTGCAGAT#TCTGTAATGTAGGCACTTTT#.((((((((.(((.((((((.#)))))).))).)))))))).	2635	2655	1.0	-20.3	1	0.01641083	0.765	0.0	0.0	-5.892671223205703	17	20	8	3UTR	MIRT535035	0	0
hsa-miR-106b-5p	XM_017016884	ACBD5	TAAAGTGCTGACAGTGCAGAT#ATCACACCACTGCATGCACTGCAGCCTG#...((.((((.(((((((...#.))))))))))))).	2592	2620	1.0	-19.6	0	0.0003809779	0.456	0.0	0.0	-11.240273430282135	13	15	13	3UTR	MIRT441294	1	1
hsa-miR-106b-5p	XM_017016896	ACBD5	TAAAGTGCTGACAGTGCAGAT#ATCACACCACTGCATGCACTGCAGCCTG#...((.((((.(((((((...#.))))))))))))).	2569	2597	1.0	-19.6	0	0.0003809779	0.456	0.0	0.0	-11.240273430282135	13	15	13	3UTR	MIRT441294	1	1
hsa-miR-106b-5p	XM_017019038	FBXO21	TAAAGTGCTGACAGTGCAGAT#CTGTCTGTCTGCATTTG#..((((((.(((((.((((..#))))))))).)))))).	2041	2058	1.0	-18.8	1	0.009248508	0.559	0.0	0.0	-6.748839937868687	15	17	9	3UTR	MIRT440658	1	1
hsa-miR-106b-5p	XM_017021438	BTBD7	TAAAGTGCTGACAGTGCAGAT#CTGCATAACCAGTACTTTGT#((((((((((...((((((..#))))))...)))))))))).	6561	6581	1.0	-20.3	1	0.00212717	0.662	0.0	0.0	-11.398282843874613	16	20	10	3UTR	MIRT441098	1	1
hsa-miR-106b-5p	XM_017024344	TRIM65	TAAAGTGCTGACAGTGCAGAT#GTGTGCAGGTGTCGGCACA#....(((((((((.((((.((#)).))))..))))))))).	2547	2566	1.0	-21.9	0	6.018403e-06	0.382	0.0	0.0	-10.403402386158335	15	19	9	3UTR	MIRT761136	0	0
hsa-miR-106b-5p	XM_017024488	KANSL1	TAAAGTGCTGACAGTGCAGAT#TCTGCACTGTTGAATCACTG#...((((.((((((((((((.#))))))))))))...)))).	3647	3667	1.0	-21.7	0	0.01696088	0.471	0.0	0.0	-8.82817512285937	16	20	12	3UTR	MIRT044368	0	0
hsa-miR-106b-5p	XM_017024551	SOCS7	TAAAGTGCTGACAGTGCAGAT#GTCTGTGCTGTGGGCCTG#...((.(((.(((((((((((#))))))))))).))))).	2498	2516	1.0	-22.9	0	0.0001828307	0.412	0.0	0.0	-9.658005423199965	16	18	11	3UTR	MIRT286951	0	0
hsa-miR-106b-5p	XM_017024551	SOCS7	TAAAGTGCTGACAGTGCAGAT#ATGTGCCTGTCAGCT#......((((((((.(((.((#)).))))))))))).	3031	3046	1.0	-19.8	0	0.004011881	0.485	0.0	0.0	-16.30200796489408	13	15	11	3UTR	MIRT286951	0	0
hsa-miR-106b-5p	XM_017029744	WNK3	TAAAGTGCTGACAGTGCAGAT#CACTGTCAAGTTGCACTTTAC#((((((((((((((((.....#))))))))....)))))))).	7203	7224	1.0	-20.3	1	0.0001408387	0.574	0.0	0.0	-3.937574446201665	16	21	8	3UTR	MIRT448316	1	1
hsa-miR-106b-5p	XM_017029744	WNK3	TAAAGTGCTGACAGTGCAGAT#ATCTGCCTTTCAGCAACTG#...((((((((.((.((((((#)))))))).)))))).)).	11062	11081	1.0	-19.4	0	0.00771136	0.662	0.0	0.0	-10.596793063525729	16	19	8	3UTR	MIRT448316	1	1
hsa-miR-106b-5p	XM_024450296	PDPK1	TAAAGTGCTGACAGTGCAGAT#CACTGTGAGCATTTTGC#(((((((((.((((((.....#)))))).))))))))).	4965	4982	1.0	-20.1	1	0.001144348	0.471	0.0	0.0	-5.180080914529843	15	17	9	3UTR	MIRT506283	0	0
hsa-miR-106b-5p	XM_047416694	LYSMD3	TAAAGTGCTGACAGTGCAGAT#TTGCACTGTTAGATCA#....(..((((((((((((..#))))))))))))..).	5024	5040	1.0	-19.8	0	0.0001562104	0.721	0.0	0.0	-12.991207764702295	13	16	12	3UTR	MIRT097653	1	0
hsa-miR-106b-5p	XM_047418568	FYN	TAAAGTGCTGACAGTGCAGAT#ATTTACAAGTTCTGTTAGCACTA#...(((((((((((.((....#.)).))))))))))).	2781	2804	1.0	-20.3	0	0.001130615	0.574	0.0	0.0	-7.249989753929374	13	16	11	3UTR	MIRT732298	1	0
hsa-miR-106b-5p	XM_047418569	FYN	TAAAGTGCTGACAGTGCAGAT#ATTTACAAGTTCTGTTAGCACTA#...(((((((((((.((....#.)).))))))))))).	2945	2968	1.0	-20.3	0	0.001130615	0.574	0.0	0.0	-7.249989753929374	13	16	11	3UTR	MIRT732298	1	0
hsa-miR-106b-5p	XM_047418679	OSTM1	TAAAGTGCTGACAGTGCAGAT#CTGTATTTGCAGCACTTTGG#((((((((((..(((((((..#)))))))..)))))))))).	3226	3246	1.0	-22.5	1	0.0003714952	0.5	0.0	0.0	-10.10915223120837	17	20	10	3UTR	MIRT020467	1	1
hsa-miR-106b-5p	XM_047420196	TPK1	TAAAGTGCTGACAGTGCAGAT#GCATTTTCGGCACTTTT#.((((((((((.(((((....#))))).)))))))))).	2030	2047	1.0	-20.7	1	0.006308969	0.515	0.0	0.0	-7.140128146953473	15	17	10	3UTR	MIRT525490	0	0
hsa-miR-106b-5p	XM_047420308	AGFG2	TAAAGTGCTGACAGTGCAGAT#GCTCCTGTCAAGCACTTTAG#((((((((((((((.((....#))..)))))).)))))))).	1427	1447	1.0	-21.9	1	0.01861216	0.471	0.0	0.0	-4.6730240064523	16	20	8	3UTR	MIRT169669	1	1
hsa-miR-106b-5p	XM_047420308	AGFG2	TAAAGTGCTGACAGTGCAGAT#TTGCCTGTGGGCATTTC#..(((((((.((((.((((..#)))))))).))))))).	924	941	1.0	-19.6	1	9.752439e-07	0.426	0.0	0.0	-6.934956747951103	15	17	8	3UTR	MIRT169669	1	1
hsa-miR-106b-5p	XM_047425317	WAC	TAAAGTGCTGACAGTGCAGAT#ATCTCCTTTCTTAAGGCACTGTTGCTATGGCACTTTT#.((((((((((((((((....#.)))))))).....)))))))).	2727	2764	1.0	-21.4	1	0.01915286	0.632	0.0	0.0	-3.793324837357118	16	23	8	3UTR	MIRT056304	1	0
hsa-miR-106b-5p	XM_047425320	WAC	TAAAGTGCTGACAGTGCAGAT#ATCTCCTTTCTTAAGGCACTGTTGCTATGGCACTTTT#.((((((((((((((((....#.)))))))).....)))))))).	2909	2946	1.0	-21.4	1	0.01915286	0.632	0.0	0.0	-3.793324837357118	16	23	8	3UTR	MIRT056304	1	0
hsa-miR-106b-5p	XM_047427539	WEE1	TAAAGTGCTGACAGTGCAGAT#ATCCCACTGGGAGCACTTTGT#(((((((((..(((((..(((#))).)))))..))))))))).	1849	1870	1.0	-20.0	1	0.0006998869	0.574	0.0	0.0	-8.004855389940193	17	21	9	3UTR	MIRT005868	1	1
hsa-miR-106b-5p	XM_047428405	ADAR	TAAAGTGCTGACAGTGCAGAT#TGTGCATTCTTTGAATAGTCACTCGTAAAAACTGTCAGTGCTTG#..(((((((((((((......#.))))))))))))).	4875	4919	1.0	-20.0	1	0.007690984	0.632	0.0	0.0	-5.1900497996759025	13	15	13	3UTR	MIRT482480	1	0
hsa-miR-106b-5p	XM_047433063	PEAK1	TAAAGTGCTGACAGTGCAGAT#GTCAGAACTGTCAGCATTTG#..(((((((((((((...(((#)))...))))))))))))).	6771	6791	1.0	-21.7	1	0.002150501	0.544	0.0	0.0	-5.1900497996759025	16	20	13	3UTR	MIRT439649	1	0
hsa-miR-106b-5p	XM_047433516	RNPS1	TAAAGTGCTGACAGTGCAGAT#TTGTACAGTCAGTACTA#...(((((((((.((((((..#)))))).))))))))).	2665	2682	1.0	-20.8	0	0.002653353	0.765	0.0	0.0	-7.803670806344982	15	17	9	3UTR	MIRT044270	0	0
hsa-miR-106b-5p	XM_047435799	KANSL1	TAAAGTGCTGACAGTGCAGAT#TCTGCACTGTTGAATCACTG#...((((.((((((((((((.#))))))))))))...)))).	3853	3873	1.0	-21.7	0	0.01696088	0.471	0.0	0.0	-8.82817512285937	16	20	12	3UTR	MIRT044368	0	0
hsa-miR-106b-5p	XM_047436369	PRKAR1A	TAAAGTGCTGACAGTGCAGAT#TCTGTAATGTAGGCACTTTT#.((((((((.(((.((((((.#)))))).))).)))))))).	3097	3117	1.0	-20.3	1	0.01641083	0.765	0.0	0.0	-5.892671223205703	17	20	8	3UTR	MIRT535035	0	0
hsa-miR-106b-5p	XM_047436945	USP32	TAAAGTGCTGACAGTGCAGAT#TCTGTGTTTGTCTTGCACTTTAA#((((((((.(((((.(((((.#)))))..)))))..)))))))).	4863	4886	1.0	-21.1	1	0.004546678	0.662	0.0	0.0	-5.729413664698063	18	23	8	3UTR	MIRT439329	1	1
hsa-miR-106b-5p	XM_047439451	ZNF665	TAAAGTGCTGACAGTGCAGAT#CTGTAATGCCAGCACTTTGG#((((((((((.((.(((((..#))))).)).)))))))))).	3140	3160	1.0	-21.5	1	0.0008095478	0.382	0.0	0.0	-7.619188839132421	17	20	10	3UTR	MIRT689192	0	0
hsa-miR-106b-5p	XM_047445924	SLC35F5	TAAAGTGCTGACAGTGCAGAT#GTTTGTAGGGGCAGCACTTTGC#((((((((((.(..(((((((#)))))))..).)))))))))).	4402	4424	1.0	-20.0	1	1.494315e-06	0.544	0.0	0.0	-8.908319451798665	18	22	10	3UTR	MIRT439608	0	0
hsa-miR-106b-5p	XM_047448834	NR2C2	TAAAGTGCTGACAGTGCAGAT#TGCAAGGTGGGCATTTTGA#(((((((((.((..((((...#))))..)).))))))))).	2919	2938	1.0	-18.9	1	0.000269415	0.544	0.0	0.0	-7.326051444716493	15	19	9	3UTR	MIRT440095	1	1
hsa-miR-106b-5p	XM_047449352	IQSEC1	TAAAGTGCTGACAGTGCAGAT#CTGCAGCCGTCAGTGCTG#...(((((((((.((((((..#))))).).))))))))).	4972	4990	1.0	-20.8	0	1.924401e-06	0.412	0.0	0.0	-7.803670806344982	15	18	9	3UTR	MIRT440431	1	1
hsa-miR-106b-5p	XM_047449974	GAB1	TAAAGTGCTGACAGTGCAGAT#ATCTCCAGTACTTTATAAAATCCCAACAATTGCTGTAAGTCAGCACTTTGG#((((((((((((..(((((..#.))))).)))))))))))).	19571	19622	1.0	-23.6	1	0.0003655233	0.529	0.0	0.0	-6.083544976388314	17	20	12	3UTR	MIRT164203	1	1
hsa-miR-106b-5p	XM_047449974	GAB1	TAAAGTGCTGACAGTGCAGAT#GTGCTGCCAGCATTTTAT#((((((((((.((((((....#)))))).)))))))))).	19414	19432	1.0	-20.9	1	0.002287034	0.559	0.0	0.0	-6.7623489216120145	16	18	10	3UTR	MIRT164203	1	1
hsa-miR-106b-5p	XM_047450092	GPRIN3	TAAAGTGCTGACAGTGCAGAT#CTGCACTGAAGGCAA#.....((((..((((((((..#))))))))..)))).	4427	4442	1.0	-20.2	0	0.001723831	0.559	0.0	0.0	-17.732880587188927	12	15	8	3UTR	MIRT703113	0	0
hsa-miR-106b-5p	NM_152457	ZNF597	TAAAGTGCTGACAGTGCAGAT#GTCTGCAAGACTGCGGCATTTG#..((((((((.((((((((((#))))))...)))))))))))).	2460	2482	1.0	-21.6	1	4.415935e-06	0.471	0.08929164615384616	0.20437616874999998	-7.7817751947826395	18	22	12	3UTR	MIRT439194	1	1
hsa-miR-106b-5p	NM_152511	DUSP18	TAAAGTGCTGACAGTGCAGAT#TCTGTGCACAGCACTTTAT#((((((((((...(((((((.#))))))).)))))))))).	2386	2405	1.0	-22.2	1	0.001593575	0.632	3.2804067000000003	1.8698513187499999	-11.398282843874613	17	19	10	3UTR	MIRT440768	0	0
hsa-miR-106b-5p	NM_152529	GPR155	TAAAGTGCTGACAGTGCAGAT#CTGTAATCTCAGCACTTTGG#(((((((((((...(((((..#)))))...))))))))))).	4010	4030	1.0	-21.6	1	0.0005305761	0.426	0.10840218181818181	0.07047300000000001	-9.430348285984671	16	20	11	3UTR	MIRT508839	0	0
hsa-miR-106b-5p	NM_152529	GPR155	TAAAGTGCTGACAGTGCAGAT#CTGTAATCCCAGCACTTTGG#((((((((((....(((((..#)))))....)))))))))).	4668	4688	1.0	-19.6	1	3.688695e-05	0.441	3.61771203	2.65479687	-12.25512276139502	15	20	10	3UTR	MIRT508839	0	0
hsa-miR-106b-5p	NM_152871	FAS	TAAAGTGCTGACAGTGCAGAT#GTCTGTGCTGTCTGCTCTC#...((.((.((((((((((((#)))))))))))).)).)).	2931	2950	1.0	-22.3	0	0.003659101	0.559	-0.66957305	-0.09835111499999998	-9.471888613117548	16	19	12	3UTR	MIRT438787	0	1
hsa-miR-106b-5p	NM_152872	FAS	TAAAGTGCTGACAGTGCAGAT#GTCTGTGCTGTCTGCTCTC#...((.((.((((((((((((#)))))))))))).)).)).	2969	2988	1.0	-22.3	0	0.003659101	0.559	-0.66957305	-0.09835111499999998	-9.471888613117548	16	19	12	3UTR	MIRT438787	0	1
hsa-miR-106b-5p	NM_153029	N4BP1	TAAAGTGCTGACAGTGCAGAT#TCTGCCTGTTCAGAACTG#...(((.(((((((.(((((.#))))))))).))).))).	3136	3154	1.0	-18.4	0	0.0008003314	0.662	0.28611975	0.7870743587500001	-8.793676288800693	15	18	9	3UTR	MIRT440159	0	0
hsa-miR-106b-5p	NM_173582	PGM2L1	TAAAGTGCTGACAGTGCAGAT#CTGCTGCTATCAGTACTTTT#.((((((((((.(((((((..#)))).))).)))))))))).	6114	6134	1.0	-21.1	1	0.02772425	0.647	0.0	0.0	-7.140128146953473	17	20	10	3UTR	MIRT439992	1	1
hsa-miR-106b-5p	NM_173822	FAM126B	TAAAGTGCTGACAGTGCAGAT#TCTGTTATGTCAGACTA#...(((.((((((..(((((.#)))))..))))))))).	2799	2816	1.0	-17.9	0	0.0004514091	0.618	0.0	0.0	-9.650516206321099	14	17	9	3UTR	MIRT440687	1	1
hsa-miR-106b-5p	NM_173824	C3orf38	TAAAGTGCTGACAGTGCAGAT#GTTTACCTGACCCTCTAAAGCGCTAAGTACTGTCAGCCTG#...((.(((((((((((....#.))))))))))))).	1124	1164	1.0	-21.7	0	0.01526938	0.603	-0.6850126545454546	-1.1261151225	-8.415498954871785	13	15	13	3UTR	MIRT092687	1	1
hsa-miR-106b-5p	NM_175736	FMNL3	TAAAGTGCTGACAGTGCAGAT#TCTGCCTGTCGGGTGCC#....((((((((((.(((((.#)))))))))))).))).	11970	11987	1.0	-19.7	0	6.498793e-06	0.441	0.0	0.0	-10.282012028888563	15	17	12	3UTR	MIRT440634	1	1
hsa-miR-106b-5p	NM_175884	CCDC71L	TAAAGTGCTGACAGTGCAGAT#TCTCACTGTCATCACTC#...((((.((((((((.(((.#))))))))))).)))).	5987	6004	1.0	-19.7	0	0.0211856	0.647	0.0	0.0	-8.82817512285937	15	17	11	3UTR	MIRT562568	1	1
hsa-miR-106b-5p	NM_177424	STX12	TAAAGTGCTGACAGTGCAGAT#TTTGCACTGTTGCACTTA#..((((((.(((((((((((.#))))))))))))))))).	2312	2330	1.0	-24.2	1	0.001756217	0.676	4.151216090909091	2.3734061625000002	-6.013390377618052	17	18	17	3UTR	MIRT044373	0	0
hsa-miR-106b-5p	NM_177968	PPM1B	TAAAGTGCTGACAGTGCAGAT#CTGTACTGATAGTACTTC#..((((((((.((((((((..#)))))))).)))))))).	3196	3214	1.0	-21.2	1	0.001117797	0.603	0.0	0.0	-7.7817751947826395	16	18	8	3UTR	MIRT044250	0	0
hsa-miR-106b-5p	NM_178170	NEK8	TAAAGTGCTGACAGTGCAGAT#CTGCATAGGCAGTGCTTTGG#((((((((((...((((((..#))))))...)))))))))).	2783	2803	1.0	-20.3	1	0.0002555684	0.353	0.0	0.0	-11.398282843874613	16	20	10	3UTR	MIRT518865	0	0
hsa-miR-106b-5p	NM_194429	CEP43	TAAAGTGCTGACAGTGCAGAT#ATCTGTGTTGTAGCATTTGTCAGTACTTC#..(((((((((((((((....#.))))).)))))))))).	10695	10724	1.0	-20.9	1	0.07922798	0.676	0.0	0.0	-4.95700071937229	15	18	10	3UTR	MIRT567549	0	1
hsa-miR-106b-5p	NM_198273	LYSMD3	TAAAGTGCTGACAGTGCAGAT#TTGCACTGTTAGATCA#....(..((((((((((((..#))))))))))))..).	4047	4063	1.0	-19.8	0	0.0001562104	0.721	1.4909684	2.334012022499999	-12.991207764702295	13	16	12	3UTR	MIRT097653	1	0
hsa-miR-106b-5p	NM_198281	GPRIN3	TAAAGTGCTGACAGTGCAGAT#CTGCACTGAAGGCAA#.....((((..((((((((..#))))))))..)))).	3375	3390	1.0	-20.2	0	0.001723831	0.559	0.9789953750000001	0.8108439187499998	-17.732880587188927	12	15	8	3UTR	MIRT703113	0	0
hsa-miR-106b-5p	NM_198336	INSIG1	TAAAGTGCTGACAGTGCAGAT#TGAAGATGTCAGCATTTTAT#(((((((((((((...((...#))....))))))))))))).	2164	2184	1.0	-18.3	1	0.004513223	0.721	4.897611538461538	4.00652744125	-5.762913004276319	15	20	13	3UTR	MIRT044329	0	0
hsa-miR-106b-5p	NM_198793	CD47	TAAAGTGCTGACAGTGCAGAT#ATCTGATGGCTCCTGCAGCACTTTT#.(((((((((.(((.((....#.))..)))))))))))).	2893	2918	1.0	-18.8	1	0.02157883	0.676	0.4943724666666667	0.58759146975	-7.353548873018103	14	18	12	3UTR	MIRT440977	0	0
hsa-miR-106b-5p	NM_198900	FMNL3	TAAAGTGCTGACAGTGCAGAT#TCTGCCTGTCGGGTGCC#....((((((((((.(((((.#)))))))))))).))).	11817	11834	1.0	-19.7	0	6.498793e-06	0.441	0.0	0.0	-10.282012028888563	15	17	12	3UTR	MIRT440634	1	1
hsa-miR-106b-5p	NM_199287	CCDC137	TAAAGTGCTGACAGTGCAGAT#CTGTAATGCCAGCACTTTGG#((((((((((.((.(((((..#))))).)).)))))))))).	1483	1503	1.0	-21.5	1	0.001001747	0.368	0.0	0.0	-7.619188839132421	17	20	10	3UTR	MIRT079348	0	0
hsa-miR-106b-5p	NM_199462	DSTYK	TAAAGTGCTGACAGTGCAGAT#CTGTAATCTCAGCACTTTGG#(((((((((((...(((((..#)))))...))))))))))).	3531	3551	1.0	-21.6	1	0.0009124823	0.382	0.20336231818181816	-0.4671970687499998	-9.430348285984671	16	20	11	3UTR	MIRT761129	1	1
hsa-miR-106b-5p	NM_199462	DSTYK	TAAAGTGCTGACAGTGCAGAT#CTGCACTGAATGACACTTTAT#((((((((...((((((((..#))))))))...).))))))).	6697	6718	1.0	-20.9	1	0.04333021	0.618	0.0	0.0	-9.06124504818596	16	21	8	3UTR	MIRT761129	1	1
hsa-miR-106b-5p	NM_001369846	ZBTB37	TAAAGTGCTGACAGTGCAGAT#CTGTCAGCACTG#...(((((((((((.......#))))))))))).	16759	16771	1.0	-19.9	0	0.005981895	0.559	0.0	0.0	-7.483038834232987	11	12	11	3UTR	MIRT182521	1	0
hsa-miR-106b-5p	NM_001370339	HMGB1	TAAAGTGCTGACAGTGCAGAT#CTGCGCTGAACATCTGTACA#....((((.((((((((((..#))))))))....)).)))).	5413	5433	1.0	-17.8	0	0.02627698	0.574	0.0	0.0	-10.602952126883691	14	20	8	3UTR	MIRT511558	0	0
hsa-miR-106b-5p	NM_001370341	HMGB1	TAAAGTGCTGACAGTGCAGAT#CTGCGCTGAACATCTGTACA#....((((.((((((((((..#))))))))....)).)))).	5285	5305	1.0	-17.8	0	0.02627698	0.574	0.0	0.0	-10.602952126883691	14	20	8	3UTR	MIRT511558	0	0
hsa-miR-106b-5p	NM_001371575	AAK1	TAAAGTGCTGACAGTGCAGAT#CTGTAATAACTGTAGAGCACTTTAA#(((((((((.(((((((((..#))))....)))))..))))))))).	12511	12536	1.0	-20.4	1	0.08839353	0.544	0.0	0.0	-5.180080914529843	18	25	9	3UTR	MIRT441317	1	1
hsa-miR-106b-5p	NM_001371910	MAP3K2	TAAAGTGCTGACAGTGCAGAT#TCTGTCTGTAGGCACA#....(((((.((((.(((((.#))))))))).))))).	10082	10098	1.0	-18.6	0	0.002039755	0.662	0.0	0.0	-11.524518497216741	14	16	9	3UTR	MIRT440283	1	1
hsa-miR-106b-5p	NM_001371911	MAP3K2	TAAAGTGCTGACAGTGCAGAT#TCTGTCTGTAGGCACA#....(((((.((((.(((((.#))))))))).))))).	9776	9792	1.0	-18.6	0	0.002039755	0.662	0.0	0.0	-11.524518497216741	14	16	9	3UTR	MIRT440283	1	1
hsa-miR-106b-5p	NM_001375670	ABI2	TAAAGTGCTGACAGTGCAGAT#TCTGTGACACTGTAAATTCTGCATTCTCTCAGCACTTG#..(((((((((.((((((((.#.))))))))...))))))))).	2281	2319	1.0	-24.5	1	0.0005515607	0.544	0.0	0.0	-8.303804028968646	17	22	9	3UTR	MIRT681710	0	0
hsa-miR-106b-5p	NM_001375698	ABI2	TAAAGTGCTGACAGTGCAGAT#TCTGTGACACTGTAAATTCTGCATTCTCTCAGCACTTG#..(((((((((.((((((((.#.))))))))...))))))))).	2029	2067	1.0	-24.5	1	0.0005515607	0.544	0.0	0.0	-8.303804028968646	17	22	9	3UTR	MIRT681710	0	0
hsa-miR-106b-5p	NM_001376938	IQSEC1	TAAAGTGCTGACAGTGCAGAT#CTGCAGCCGTCAGTGCTG#...(((((((((.((((((..#))))).).))))))))).	5510	5528	1.0	-20.8	0	1.924401e-06	0.412	0.0	0.0	-7.803670806344982	15	18	9	3UTR	MIRT440431	1	1
hsa-miR-106b-5p	NM_001377394	TMEM267	TAAAGTGCTGACAGTGCAGAT#CTGCACTGCAGCCTG#...((.((((.((((((((..#)))))))))))))).	2806	2821	1.0	-22.5	0	3.309817e-05	0.5	0.0	0.0	-11.240273430282135	14	15	14	3UTR	MIRT441045	0	1
hsa-miR-106b-5p	NM_001377401	TMEM267	TAAAGTGCTGACAGTGCAGAT#CTGCACTGCAGCCTG#...((.((((.((((((((..#)))))))))))))).	2753	2768	1.0	-22.5	0	3.309817e-05	0.5	0.0	0.0	-11.240273430282135	14	15	14	3UTR	MIRT441045	0	1
hsa-miR-106b-5p	NM_001377403	TMEM267	TAAAGTGCTGACAGTGCAGAT#CTGCACTGCAGCCTG#...((.((((.((((((((..#)))))))))))))).	2898	2913	1.0	-22.5	0	3.309817e-05	0.5	0.0	0.0	-11.240273430282135	14	15	14	3UTR	MIRT441045	0	1
hsa-miR-106b-5p	NM_001377960	RBM12B	TAAAGTGCTGACAGTGCAGAT#ATTTATTAGGCACTTACTATGTGCTAGGCACTGTAAGCACTTTAC#(((((((((.(((((((....#.))))))).))))))))).	4399	4444	1.0	-24.5	1	0.0009834951	0.574	0.0	0.0	-5.180080914529843	16	19	9	3UTR	MIRT044375	0	1
hsa-miR-106b-5p	NM_001377963	RBM12B	TAAAGTGCTGACAGTGCAGAT#ATTTATTAGGCACTTACTATGTGCTAGGCACTGTAAGCACTTTAC#(((((((((.(((((((....#.))))))).))))))))).	4344	4389	1.0	-24.5	1	0.0009834951	0.574	0.0	0.0	-5.180080914529843	16	19	9	3UTR	MIRT044375	0	1
hsa-miR-106b-5p	NM_001379198	KANSL1	TAAAGTGCTGACAGTGCAGAT#TCTGCACTGTTGAATCACTG#...((((.((((((((((((.#))))))))))))...)))).	3839	3859	1.0	-21.7	0	0.01696088	0.471	0.0	0.0	-8.82817512285937	16	20	12	3UTR	MIRT044368	0	0
hsa-miR-106b-5p	NM_001382445	HIP1	TAAAGTGCTGACAGTGCAGAT#ATCTGCACAGTCAGA#.......(((((.((((((((#)))))))).))))).	3661	3676	1.0	-20.0	0	0.003622169	0.456	0.0	0.0	-18.39937555218101	13	15	8	3UTR	MIRT634652	0	0
hsa-miR-106b-5p	NM_001385026	PEAK1	TAAAGTGCTGACAGTGCAGAT#GTCAGAACTGTCAGCATTTG#..(((((((((((((...(((#)))...))))))))))))).	6909	6929	1.0	-21.7	1	0.002150501	0.544	0.0	0.0	-5.1900497996759025	16	20	13	3UTR	MIRT439649	1	0
hsa-miR-106b-5p	NM_001385256	PTP4A1	TAAAGTGCTGACAGTGCAGAT#TCTTGCTGTCAGCATA#....((((((((((((.(((.#))))))))))))))).	1713	1729	1.0	-20.6	0	0.0001302808	0.676	0.0	0.0	-9.546562468637928	15	16	15	3UTR	MIRT485195	0	0
hsa-miR-106b-5p	NM_001385259	PTP4A1	TAAAGTGCTGACAGTGCAGAT#ATTTGGATACTTGGCAAAAGATTCTTGCTGTCAGCATA#....((((((((((((.(((.#.))))))))))))))).	1204	1242	1.0	-20.8	0	0.0001302808	0.676	0.0	0.0	-9.546562468637928	15	17	15	3UTR	MIRT485195	0	0
hsa-miR-106b-5p	NM_001385259	PTP4A1	TAAAGTGCTGACAGTGCAGAT#TGTCAGCATTTTAG#(((((((((((((........#))))))))))))).	2413	2427	1.0	-18.0	1	0.03712889	0.735	0.0	0.0	-5.762913004276319	13	14	13	3UTR	MIRT485195	0	0
hsa-miR-106b-5p	NM_001385260	PTP4A1	TAAAGTGCTGACAGTGCAGAT#ATTTGGATACTTGGCAAAAGATTCTTGCTGTCAGCATA#....((((((((((((.(((.#.))))))))))))))).	1194	1232	1.0	-20.8	0	0.0001302808	0.676	0.0	0.0	-9.546562468637928	15	17	15	3UTR	MIRT485195	0	0
hsa-miR-106b-5p	NM_001385260	PTP4A1	TAAAGTGCTGACAGTGCAGAT#TGTCAGCATTTTAG#(((((((((((((........#))))))))))))).	2403	2417	1.0	-18.0	1	0.03712889	0.735	0.0	0.0	-5.762913004276319	13	14	13	3UTR	MIRT485195	0	0
hsa-miR-106b-5p	NM_001388359	KIAA0513	TAAAGTGCTGACAGTGCAGAT#TGCACTGCAGCCTG#...((.((((.(((((((...#))))))))))))).	6601	6615	1.0	-19.6	0	0.001417604	0.456	0.0	0.0	-11.240273430282135	13	14	13	3UTR	MIRT075778	1	1
hsa-miR-106b-5p	NM_001388492	HTT	TAAAGTGCTGACAGTGCAGAT#GGACTGTCAGCTGAGCTTG#..(((((((((((((.(....#).)))))))))...)))).	13290	13309	1.0	-20.0	1	4.470331e-05	0.382	0.0	0.0	-5.1900497996759025	14	19	9	3UTR	MIRT044299	0	0
hsa-miR-106b-5p	NM_001395199	ZBTB37	TAAAGTGCTGACAGTGCAGAT#CTGTCAGCACTG#...(((((((((((.......#))))))))))).	16711	16723	1.0	-19.9	0	0.005981895	0.559	0.0	0.0	-7.483038834232987	11	12	11	3UTR	MIRT182521	1	0
hsa-miR-106b-5p	NM_014331	SLC7A11	TAAAGTGCTGACAGTGCAGAT#GTCCGGCACGGTGGCTCATGCCTGTAATCCCAGCACTTTGG#((((((((((((((.(((((.#.)).))))))).....)))))))))).	6291	6332	1.0	-20.9	1	0.0002531819	0.368	-0.17397378947368417	0.08585636250000009	-4.6730240064523	19	27	10	3UTR	MIRT686845	0	0
hsa-miR-106b-5p	NM_014402	UQCRQ	TAAAGTGCTGACAGTGCAGAT#GTCTGCACTGTTGTG#......((.((((((((((((#)))))))))))))).	406	421	1.0	-19.2	0	0.004777708	0.647	-0.32885749999999997	0.5834641512499998	-16.62294806288921	14	15	14	3UTR	MIRT044341	0	0
hsa-miR-106b-5p	NM_014455	RNF115	TAAAGTGCTGACAGTGCAGAT#CTGTAATCTCAGCATTTTGG#(((((((((((...(((((..#)))))...))))))))))).	6887	6907	1.0	-19.3	1	4.16799e-05	0.485	0.5863529918181818	0.261710717625	-9.430348285984671	16	20	11	3UTR	MIRT687062	0	0
hsa-miR-106b-5p	NM_014547	TMOD3	TAAAGTGCTGACAGTGCAGAT#CTGCACTGCAGTCTG#...((.((((.((((((((..#)))))))))))))).	3043	3058	1.0	-19.8	0	1.943006e-05	0.515	-0.20748499999999998	-0.2228907275	-11.240273430282135	14	15	14	3UTR	MIRT686600	0	0
hsa-miR-106b-5p	NM_014584	ERO1A	TAAAGTGCTGACAGTGCAGAT#ATCTGCCTGTTGCACTTTT#.(((((((.(((((.((((((#)))))))))))))))))).	4151	4170	1.0	-22.9	1	0.05204117	0.5	2.6705291428571427	3.663317608750001	-5.585164055853516	18	19	18	3UTR	MIRT044365	0	0
hsa-miR-106b-5p	NM_014598	SOCS7	TAAAGTGCTGACAGTGCAGAT#GTCTGTGCTGTGGGCCTG#...((.(((.(((((((((((#))))))))))).))))).	2600	2618	1.0	-22.9	0	0.0001828307	0.412	-0.4157767272727273	0.17035053887500004	-9.658005423199965	16	18	11	3UTR	MIRT286951	0	0
hsa-miR-106b-5p	NM_014598	SOCS7	TAAAGTGCTGACAGTGCAGAT#ATGTGCCTGTCAGCT#......((((((((.(((.((#)).))))))))))).	3133	3148	1.0	-19.8	0	0.004011881	0.485	0.6780478750000001	0.4680502225	-16.30200796489408	13	15	11	3UTR	MIRT286951	0	0
hsa-miR-106b-5p	NM_014679	CEP57	TAAAGTGCTGACAGTGCAGAT#CTGTACTGACGCTGCACTTTGT#((((((((((.((((((((..#)))))))).))..)))))))).	1952	1974	1.0	-21.1	1	0.009736821	0.603	1.007041	0.6714747549999999	-6.7623489216120145	18	22	8	3UTR	MIRT247082	1	0
hsa-miR-106b-5p	NM_014711	CCP110	TAAAGTGCTGACAGTGCAGAT#CTGTACTCCCAGCATTTTGT#((((((((((..(((((((..#)))))))..)))))))))).	4279	4299	1.0	-21.8	1	0.007523746	0.397	0.0314565	-0.024062699999999992	-10.10915223120837	17	20	10	3UTR	MIRT142099	0	1
hsa-miR-106b-5p	NM_014866	SEC16A	TAAAGTGCTGACAGTGCAGAT#CTGCACTTTCCGTGAGCACTTTT#.((((((((.(((((((((..#)))))))....)).)))))))).	8270	8293	1.0	-23.5	1	0.03491203	0.529	0.38606443076923075	0.47321215250000004	-5.035831305685297	17	23	8	3UTR	MIRT439693	0	0
hsa-miR-106b-5p	NM_014911	AAK1	TAAAGTGCTGACAGTGCAGAT#CTGTAATAACTGTAGAGCACTTTAA#(((((((((.(((((((((..#))))....)))))..))))))))).	12629	12654	1.0	-20.4	1	0.08839353	0.544	0.940381846153846	0.24343361524999996	-5.180080914529843	18	25	9	3UTR	MIRT441317	1	1
hsa-miR-106b-5p	NM_014947	FOXJ3	TAAAGTGCTGACAGTGCAGAT#TCTGTACTGCTGTTGGACAGTCAGTGTTTTAA#((((((((((((((((((((.#))))))))...........)))))))))))).	5018	5050	1.0	-18.6	1	0.005780935	0.588	3.3781990967741935	3.1102348838749996	-3.937574446201665	20	32	12	3UTR	MIRT069700	1	1
hsa-miR-106b-5p	NM_015002	FBXO21	TAAAGTGCTGACAGTGCAGAT#CTGTCTGTCTGCATTTG#..((((((.(((((.((((..#))))))))).)))))).	2221	2238	1.0	-18.8	1	0.009248508	0.559	0.3824361666666667	0.04553778874999989	-6.748839937868687	15	17	9	3UTR	MIRT440658	1	1
hsa-miR-106b-5p	NM_015346	ZFYVE26	TAAAGTGCTGACAGTGCAGAT#TTTGCACTGAACATAAGCACTTTAT#(((((((((..(((((((((.#)))))))))......))))))))).	9402	9427	1.0	-22.6	1	0.1824349	0.588	1.6856075555555554	2.8447324025	-8.004855389940193	18	25	9	3UTR	MIRT484923	1	1
hsa-miR-106b-5p	NM_015351	TTC9	TAAAGTGCTGACAGTGCAGAT#CTGCACTGTCATCCCCTGCCTGGACTTTT#.(((((.((((((((((((..#)))))))))))..........).))))).	3939	3968	1.0	-21.9	0	0.0002847721	0.471	0.40569253636363634	0.08764175750000001	-5.337011372228436	17	29	11	3UTR	MIRT242200	1	0
hsa-miR-106b-5p	NM_015352	POFUT1	TAAAGTGCTGACAGTGCAGAT#GCAAAGTCAGCATTTG#..((((((((((..(((....#)))..)))))))))).	2581	2597	1.0	-19.5	1	0.00152726	0.559	0.49050070999999995	0.18020341362499998	-7.102971249558938	13	16	10	3UTR	MIRT152682	1	0
hsa-miR-106b-5p	NM_015375	DSTYK	TAAAGTGCTGACAGTGCAGAT#CTGTAATCTCAGCACTTTGG#(((((((((((...(((((..#)))))...))))))))))).	3666	3686	1.0	-21.6	1	0.0009124823	0.382	0.9168347272727272	0.63306922	-9.430348285984671	16	20	11	3UTR	MIRT761129	1	1
hsa-miR-106b-5p	NM_015375	DSTYK	TAAAGTGCTGACAGTGCAGAT#CTGCACTGAATGACACTTTAT#((((((((...((((((((..#))))))))...).))))))).	6832	6853	1.0	-20.9	1	0.04333021	0.618	1.0376626250000003	2.8114134825	-9.06124504818596	16	21	8	3UTR	MIRT761129	1	1
hsa-miR-106b-5p	NM_015443	KANSL1	TAAAGTGCTGACAGTGCAGAT#TCTGCACTGTTGAATCACTG#...((((.((((((((((((.#))))))))))))...)))).	4285	4305	1.0	-21.7	0	0.01696088	0.471	1.4565822	2.7773925250000002	-8.82817512285937	16	20	12	3UTR	MIRT044368	0	0
hsa-miR-106b-5p	NM_015459	ATL3	TAAAGTGCTGACAGTGCAGAT#TCTGCTTTGTGCACTTTAT#((((((((..((((.(((((.#))))).)))))))))))).	1918	1937	1.0	-19.5	1	0.0007118506	0.632	0.581190125	-0.25359172875	-6.971920133026242	17	19	12	3UTR	MIRT441161	1	1
hsa-miR-106b-5p	NM_015626	WSB1	TAAAGTGCTGACAGTGCAGAT#CTGCACTGTAGCATG#....(((((.(((((((((..#)))))))))))))).	4699	4714	1.0	-21.8	0	0.0008360841	0.471	-0.6287498666666667	0.29823515375000004	-10.789068936966107	14	15	14	3UTR	MIRT520158	0	0
hsa-miR-106b-5p	NM_015702	MMADHC	TAAAGTGCTGACAGTGCAGAT#ATTTGTATGTAATATTTGGGTTGATCTATAAACACTGTCAGACTA#...(((.(((((((((.....#.)))))))))))).	1082	1127	1.0	-17.7	0	0.03699609	0.779	3.1685464222222217	4.722794665	-8.058226728550057	12	14	12	3UTR	MIRT044302	0	0
hsa-miR-106b-5p	NM_015840	ADAR	TAAAGTGCTGACAGTGCAGAT#TGTGCATTCTTTGAATAGTCACTCGTAAAAACTGTCAGTGCTTG#..(((((((((((((......#.))))))))))))).	5175	5219	1.0	-20.0	1	0.007690984	0.632	-0.21151897692307686	-0.34853787249999996	-5.1900497996759025	13	15	13	3UTR	MIRT482480	1	0
hsa-miR-106b-5p	NM_016009	SH3GLB1	TAAAGTGCTGACAGTGCAGAT#CTGTACTGTGGTACA#....(((((.(((((((((..#)))))))))))))).	2202	2217	1.0	-19.8	0	3.092151e-05	0.632	0.1756368888888889	0.3620802299999999	-10.789068936966107	14	15	14	3UTR	MIRT199285	0	1
hsa-miR-106b-5p	NM_016220	ZNF107	TAAAGTGCTGACAGTGCAGAT#TCTGCACTTTTAGATACTTTAG#(((((((((((.((((((((.#)))))))).)))).))))))).	5930	5952	1.0	-22.3	1	0.0278849	0.676	0.0	0.0	-7.284377755798021	19	22	8	3UTR	MIRT551129	0	1
hsa-miR-106b-5p	NM_016248	AKAP11	TAAAGTGCTGACAGTGCAGAT#CTGTGCTGAGTTCAGCATTTG#..(((((((((((((((((..#))))))))...))))))))).	8012	8033	1.0	-22.0	1	6.127581e-05	0.603	0.173250545	0.13598438249999997	-4.95700071937229	17	21	9	3UTR	MIRT020469	1	1
hsa-miR-106b-5p	NM_016400	HYPK	TAAAGTGCTGACAGTGCAGAT#CTGTAATCTCAGCACTTTGG#(((((((((((...(((((..#)))))...))))))))))).	2478	2498	1.0	-21.6	1	0.004555713	0.397	0.054226363636363656	-0.1777943125	-9.430348285984671	16	20	11	3UTR	MIRT523085	0	0
hsa-miR-106b-5p	NM_017614	BHMT2	TAAAGTGCTGACAGTGCAGAT#CTGCAATCCCAGCACTTTGG#((((((((((....(((((..#)))))....)))))))))).	1725	1745	1.0	-21.6	1	7.141115e-05	0.368	-0.06995121999999998	-0.24789295499999975	-12.25512276139502	15	20	10	3UTR	MIRT685727	0	0
hsa-miR-106b-5p	NM_017656	ZNF562	TAAAGTGCTGACAGTGCAGAT#TTGCACTGCAGCCTG#...((.((((.((((((((..#)))))))))))))).	8101	8116	1.0	-20.2	0	0.0007442858	0.485	-0.215762	-0.08200490000000002	-11.240273430282135	14	15	14	3UTR	MIRT044315	0	0
hsa-miR-106b-5p	NM_018275	TRAPPC14	TAAAGTGCTGACAGTGCAGAT#GTTTGCAGCCTGAAGCACTTTAA#(((((((((..((((((((((#)))))))..))).))))))))).	2443	2466	1.0	-20.6	1	0.01654092	0.632	0.3021255833333334	-0.0395495074999999	-8.004855389940193	19	23	9	3UTR	MIRT441038	1	1
hsa-miR-106b-5p	NM_001193465	KANSL1	TAAAGTGCTGACAGTGCAGAT#TCTGCACTGTTGAATCACTG#...((((.((((((((((((.#))))))))))))...)))).	3836	3856	1.0	-21.7	0	0.01696088	0.471	2.8692261	2.9472698900000003	-8.82817512285937	16	20	12	3UTR	MIRT044368	0	0
hsa-miR-106b-5p	NM_001193495	ADAR	TAAAGTGCTGACAGTGCAGAT#TGTGCATTCTTTGAATAGTCACTCGTAAAAACTGTCAGTGCTTG#..(((((((((((((......#.))))))))))))).	5306	5350	1.0	-20.0	1	0.007690984	0.632	0.10775027692307691	0.9470483549999997	-5.1900497996759025	13	15	13	3UTR	MIRT482480	1	0
hsa-miR-106b-5p	NM_001197131	PPP1R12B	TAAAGTGCTGACAGTGCAGAT#CTGCATTGAGGCGCTC#...((((((..((((((((..#)))))))).)))))).	1113	1129	1.0	-21.3	0	0.0007301868	0.515	0.062267874999999986	0.194229795	-10.581821137417268	14	16	8	3UTR	MIRT132403	0	1
hsa-miR-106b-5p	NM_001197246	BTN3A2	TAAAGTGCTGACAGTGCAGAT#CACTGAAGCACTTTAC#(((((((((..(((((.....#))))).))))))))).	1805	1821	1.0	-17.9	1	0.05865482	0.632	-0.20477080000000003	-0.33070433999999993	-8.004855389940193	14	16	9	3UTR	MIRT168223	0	1
hsa-miR-106b-5p	NM_001197247	BTN3A2	TAAAGTGCTGACAGTGCAGAT#CACTGAAGCACTTTAC#(((((((((..(((((.....#))))).))))))))).	3045	3061	1.0	-17.9	1	0.05865482	0.632	-0.20477080000000003	-0.33070433999999993	-8.004855389940193	14	16	9	3UTR	MIRT168223	0	1
hsa-miR-106b-5p	NM_001197248	BTN3A2	TAAAGTGCTGACAGTGCAGAT#CACTGAAGCACTTTAC#(((((((((..(((((.....#))))).))))))))).	2602	2618	1.0	-17.9	1	0.05865482	0.632	-0.4332691777777778	-0.25592337499999995	-8.004855389940193	14	16	9	3UTR	MIRT168223	0	1
hsa-miR-106b-5p	NM_001197249	BTN3A2	TAAAGTGCTGACAGTGCAGAT#CACTGAAGCACTTTAC#(((((((((..(((((.....#))))).))))))))).	2663	2679	1.0	-17.9	1	0.05865482	0.632	-0.4332691777777778	-0.25592337499999995	-8.004855389940193	14	16	9	3UTR	MIRT168223	0	1
hsa-miR-106b-5p	NM_001198609	MAP7	TAAAGTGCTGACAGTGCAGAT#TCTGCGTGGCATCTGTCAGCT#......((((((((((((((.#))))))......)))))))).	3975	3996	1.0	-20.1	0	0.0009616224	0.574	2.4498273500000005	2.8204026974999996	-15.566558404643448	14	21	8	3UTR	MIRT502007	1	0
hsa-miR-106b-5p	NM_001198611	MAP7	TAAAGTGCTGACAGTGCAGAT#TCTGCGTGGCATCTGTCAGCT#......((((((((((((((.#))))))......)))))))).	3840	3861	1.0	-20.1	0	0.0009616224	0.574	2.4498273500000005	2.8204026974999996	-15.566558404643448	14	21	8	3UTR	MIRT502007	1	0
hsa-miR-106b-5p	NM_001198615	MAP7	TAAAGTGCTGACAGTGCAGAT#TCTGCGTGGCATCTGTCAGCT#......((((((((((((((.#))))))......)))))))).	3318	3339	1.0	-20.1	0	0.0009616224	0.574	1.2452913049999996	1.7614393412500005	-15.566558404643448	14	21	8	3UTR	MIRT502007	1	0
hsa-miR-106b-5p	NM_001198616	MAP7	TAAAGTGCTGACAGTGCAGAT#TCTGCGTGGCATCTGTCAGCT#......((((((((((((((.#))))))......)))))))).	3170	3191	1.0	-20.1	0	0.0009616224	0.574	3.00381815	1.8008577325000004	-15.566558404643448	14	21	8	3UTR	MIRT502007	1	0
hsa-miR-106b-5p	NM_001198617	MAP7	TAAAGTGCTGACAGTGCAGAT#TCTGCGTGGCATCTGTCAGCT#......((((((((((((((.#))))))......)))))))).	2999	3020	1.0	-20.1	0	0.0009616224	0.574	0.514089915	1.10169313125	-15.566558404643448	14	21	8	3UTR	MIRT502007	1	0
hsa-miR-106b-5p	NM_001198619	MAP7	TAAAGTGCTGACAGTGCAGAT#TCTGCGTGGCATCTGTCAGCT#......((((((((((((((.#))))))......)))))))).	3752	3773	1.0	-20.1	0	0.0009616224	0.574	3.7088251	3.6008047637500002	-15.566558404643448	14	21	8	3UTR	MIRT502007	1	0
hsa-miR-106b-5p	NM_001198634	RUNX1T1	TAAAGTGCTGACAGTGCAGAT#GTCTAGGCATCATGCTTTTGTCAGCATA#....((((((((((.((((((#.))).)))..)))))))))).	5412	5440	1.0	-19.7	0	0.001387745	0.529	0.0	0.0	-10.282012028888563	16	21	10	3UTR	MIRT020443	0	0
hsa-miR-106b-5p	NM_001198850	FOXJ3	TAAAGTGCTGACAGTGCAGAT#GTCTGCCTGCCTCAGCCTC#...((.((((((((.((((((#)))))))))..))))))).	3287	3306	1.0	-19.0	0	0.001953783	0.441	2.65540692	4.3959527825	-9.150948515122419	16	19	9	3UTR	MIRT069700	1	1
hsa-miR-106b-5p	NM_001198852	FOXJ3	TAAAGTGCTGACAGTGCAGAT#GTCTGCCTGCCTCAGCCTC#...((.((((((((.((((((#)))))))))..))))))).	3107	3126	1.0	-19.0	0	0.001953783	0.441	1.4847623999999997	1.00885352	-9.150948515122419	16	19	9	3UTR	MIRT069700	1	1
hsa-miR-106b-5p	NM_001198852	FOXJ3	TAAAGTGCTGACAGTGCAGAT#TCTGTACTGCTGTTGGACAGTCAGTGTTTTAA#((((((((((((((((((((.#))))))))...........)))))))))))).	4916	4948	1.0	-18.6	1	0.005780935	0.588	3.1590681290322578	3.43234105	-3.937574446201665	20	32	12	3UTR	MIRT069700	1	1
hsa-miR-106b-5p	NM_001199022	CCP110	TAAAGTGCTGACAGTGCAGAT#CTGTACTCCCAGCATTTTGT#((((((((((..(((((((..#)))))))..)))))))))).	4222	4242	1.0	-21.8	1	0.007523746	0.397	0.0314565	-0.024062699999999992	-10.10915223120837	17	20	10	3UTR	MIRT142099	0	1
hsa-miR-106b-5p	NM_001199155	KAT7	TAAAGTGCTGACAGTGCAGAT#GTCTGTAATCTCAGCACTTTGG#(((((((((((...(((((((#)))))))...))))))))))).	5417	5439	1.0	-23.8	1	9.734834e-05	0.485	-0.0005361090909091078	-0.1350588275	-9.430348285984671	18	22	11	3UTR	MIRT044356	0	0
hsa-miR-106b-5p	NM_001199156	KAT7	TAAAGTGCTGACAGTGCAGAT#GTCTGTAATCTCAGCACTTTGG#(((((((((((...(((((((#)))))))...))))))))))).	5090	5112	1.0	-23.8	1	9.734834e-05	0.485	-0.0005361090909091078	-0.1350588275	-9.430348285984671	18	22	11	3UTR	MIRT044356	0	0
hsa-miR-106b-5p	NM_001199157	KAT7	TAAAGTGCTGACAGTGCAGAT#GTCTGTAATCTCAGCACTTTGG#(((((((((((...(((((((#)))))))...))))))))))).	5177	5199	1.0	-23.8	1	9.734834e-05	0.485	-0.0005361090909091078	-0.1350588275	-9.430348285984671	18	22	11	3UTR	MIRT044356	0	0
hsa-miR-106b-5p	NM_001199158	KAT7	TAAAGTGCTGACAGTGCAGAT#GTCTGTAATCTCAGCACTTTGG#(((((((((((...(((((((#)))))))...))))))))))).	5000	5022	1.0	-23.8	1	9.734834e-05	0.485	-0.0005361090909091078	-0.1350588275	-9.430348285984671	18	22	11	3UTR	MIRT044356	0	0
hsa-miR-106b-5p	NM_001199356	RPL17-C18orf32	TAAAGTGCTGACAGTGCAGAT#TCAGCACTTTAA#(((((((((((..........#))))))))))).	1037	1049	1.0	-15.7	1	0.07100953	0.706	0.6442292818181818	1.26226832	-10.39884692653892	11	12	11	3UTR	MIRT571730	0	1
hsa-miR-106b-5p	NM_001201329	PPP1R3B	TAAAGTGCTGACAGTGCAGAT#TGCCTGTAATCCCAGCACTTTGG#((((((((((((((.(((...#))))))).....)))))))))).	2032	2055	1.0	-20.2	1	3.716151e-05	0.368	0.0	0.0	-4.6730240064523	17	23	10	3UTR	MIRT439917	1	1
hsa-miR-106b-5p	NM_001204	BMPR2	TAAAGTGCTGACAGTGCAGAT#CTGCACTGCAGCCTA#...((.((((.((((((((..#)))))))))))))).	7716	7731	1.0	-22.4	0	0.000156914	0.456	0.2149746125	-0.11985676250000005	-11.240273430282135	14	15	14	3UTR	MIRT086761	1	1
hsa-miR-106b-5p	NM_001204107	BCL2L11	TAAAGTGCTGACAGTGCAGAT#TCTGGTTGCAGGCTTTCCCATGGTCACAGGATGCACTGTCAGCATC#....((((((((((((((...#.)))))))))))))).	1809	1855	1.0	-26.1	0	0.0002937184	0.412	-0.4862677071428573	-0.537208035	-9.546562468637928	14	16	14	3UTR	MIRT004571	1	1
hsa-miR-106b-5p	NM_001204108	BCL2L11	TAAAGTGCTGACAGTGCAGAT#TCTGGTTGCAGGCTTTCCCATGGTCACAGGATGCACTGTCAGCATC#....((((((((((((((...#.)))))))))))))).	2014	2060	1.0	-26.1	0	0.0002937184	0.412	-0.4862677071428573	-0.537208035	-9.546562468637928	14	16	14	3UTR	MIRT004571	1	1
hsa-miR-106b-5p	NM_001204109	BCL2L11	TAAAGTGCTGACAGTGCAGAT#TCTGGTTGCAGGCTTTCCCATGGTCACAGGATGCACTGTCAGCATC#....((((((((((((((...#.)))))))))))))).	1903	1949	1.0	-26.1	0	0.0002937184	0.412	-0.4862677071428573	-0.537208035	-9.546562468637928	14	16	14	3UTR	MIRT004571	1	1
hsa-miR-106b-5p	NM_001204110	BCL2L11	TAAAGTGCTGACAGTGCAGAT#TCTGGTTGCAGGCTTTCCCATGGTCACAGGATGCACTGTCAGCATC#....((((((((((((((...#.)))))))))))))).	1744	1790	1.0	-26.1	0	0.0002937184	0.412	-0.4862677071428573	-0.537208035	-9.546562468637928	14	16	14	3UTR	MIRT004571	1	1
hsa-miR-106b-5p	NM_001204112	BCL2L11	TAAAGTGCTGACAGTGCAGAT#TCTGGTTGCAGGCTTTCCCATGGTCACAGGATGCACTGTCAGCATC#....((((((((((((((...#.)))))))))))))).	1723	1769	1.0	-26.1	0	0.0002937184	0.412	-0.4862677071428573	-0.537208035	-9.546562468637928	14	16	14	3UTR	MIRT004571	1	1
hsa-miR-106b-5p	NM_001204385	VEGFA	TAAAGTGCTGACAGTGCAGAT#TCTGCGCAGAGCACTTTGG#(((((((((....(((((((.#)))))))..))))))))).	1718	1737	1.0	-22.0	1	0.00375543	0.397	4.764139999999999	3.1504124124999997	-12.640789312202793	16	19	9	3UTR	MIRT004466	1	1
hsa-miR-106b-5p	NM_001204817	ZNF587	TAAAGTGCTGACAGTGCAGAT#ATCTGCCTGCCTCAGCT#......((((((((.((((((#)))))))))..))))).	2862	2879	1.0	-18.1	0	0.0004754697	0.485	-0.3718411000000001	-0.006861774999999952	-16.30200796489408	14	17	9	3UTR	MIRT044316	0	0
hsa-miR-106b-5p	NM_001206491	MAVS	TAAAGTGCTGACAGTGCAGAT#CTGCACTTCAGCCTA#...((.(((((.(((((((..#)))))))))))))).	7836	7851	1.0	-20.2	0	0.001348992	0.5	-0.30456677142857147	0.06259049	-11.76230226446814	14	15	14	3UTR	MIRT153335	0	1
hsa-miR-106b-5p	NM_001206652	SH3GLB1	TAAAGTGCTGACAGTGCAGAT#CTGTACTGTGGTACA#....(((((.(((((((((..#)))))))))))))).	2265	2280	1.0	-19.8	0	3.092151e-05	0.632	0.1756368888888889	0.3620802299999999	-10.789068936966107	14	15	14	3UTR	MIRT199285	0	1
hsa-miR-106b-5p	NM_001206794	ARID4B	TAAAGTGCTGACAGTGCAGAT#ATCTGGCACTGTTAATACACAGTACTTTAT#(((((((((((((((((((((#))))).)))))).......)))))))))).	5511	5541	1.0	-23.5	1	0.001097925	0.721	5.853383413793104	4.3276190342500005	-3.937574446201665	21	30	10	3UTR	MIRT441190	1	1
hsa-miR-106b-5p	NM_001206844	TGOLN2	TAAAGTGCTGACAGTGCAGAT#TCTGTGCTGTCAAGGCAGTA#...(.(((((((((((((((.#))))))))))))..))).).	2492	2512	1.0	-21.6	0	5.662216e-05	0.603	-0.08455734117647055	-0.06477658625000007	-10.63357736849121	16	20	12	3UTR	MIRT439461	1	0
hsa-miR-106b-5p	NM_001207069	BZW1	TAAAGTGCTGACAGTGCAGAT#TGTACTGTTTCTGTGCTTTGT#((((((((.(((((((((...#)))))))))...)))))))).	4244	4265	1.0	-18.4	1	0.0002910981	0.676	0.0	0.0	-4.993964104447428	17	21	9	3UTR	MIRT480563	1	0
hsa-miR-106b-5p	NM_001242892	CSDE1	TAAAGTGCTGACAGTGCAGAT#TCTGCCTTAGCACTC#...(((((((..((.(((((.#)))))))))))))).	2860	2875	1.0	-16.9	0	0.001404031	0.618	6.492622857142856	5.384905399999999	-13.42156753893608	14	15	14	3UTR	MIRT544634	0	1
hsa-miR-106b-5p	NM_001242893	CSDE1	TAAAGTGCTGACAGTGCAGAT#TCTGCCTTAGCACTC#...(((((((..((.(((((.#)))))))))))))).	2767	2782	1.0	-16.9	0	0.001404031	0.618	5.084951428571429	5.6626491112499995	-13.42156753893608	14	15	14	3UTR	MIRT544634	0	1
hsa-miR-106b-5p	NM_001243078	CD28	TAAAGTGCTGACAGTGCAGAT#ATTTGCACTGCCAGCT#......((((.((((((((((#)))))))))).)))).	3742	3758	1.0	-20.7	0	0.0008700646	0.5	0.115140196	0.10958572350000002	-18.3913328800538	14	16	10	3UTR	MIRT684937	0	0
hsa-miR-106b-5p	NM_001243198	HIP1	TAAAGTGCTGACAGTGCAGAT#ATCTGCACAGTCAGA#.......(((((.((((((((#)))))))).))))).	3498	3513	1.0	-20.0	0	0.003622169	0.456	-0.240386375	0.010260532000000053	-18.39937555218101	13	15	8	3UTR	MIRT634652	0	0
hsa-miR-106b-5p	NM_001243776	CEP57	TAAAGTGCTGACAGTGCAGAT#CTGTACTGACGCTGCACTTTGT#((((((((((.((((((((..#)))))))).))..)))))))).	1996	2018	1.0	-21.1	1	0.009736821	0.603	-0.4171995	0.7287920712499999	-6.7623489216120145	18	22	8	3UTR	MIRT247082	1	0
hsa-miR-106b-5p	NM_001243777	CEP57	TAAAGTGCTGACAGTGCAGAT#CTGTACTGACGCTGCACTTTGT#((((((((((.((((((((..#)))))))).))..)))))))).	1874	1896	1.0	-21.1	1	0.009736821	0.603	-0.4171995	0.7287920712499999	-6.7623489216120145	18	22	8	3UTR	MIRT247082	1	0
hsa-miR-106b-5p	NM_001243999	SPIB	TAAAGTGCTGACAGTGCAGAT#GTCGCTGGTGGTGGTCTCTTTAGTGCACTGTAGCACTTG#..(((((((.((((((((...#.))))))))))))))).	1816	1855	1.0	-23.3	1	0.0001143445	0.471	0.516848825	-0.17051823625	-6.199507187700468	15	17	15	3UTR	MIRT615182	0	0
hsa-miR-106b-5p	NM_001252036	RAB5B	TAAAGTGCTGACAGTGCAGAT#ATCTCCACTGTTAGCT#......((((((((((.((((#)))).)))))))))).	1918	1934	1.0	-19.5	0	0.05354	0.588	0.16718593099999995	0.813626035	-15.566558404643448	14	16	10	3UTR	MIRT065889	1	1
hsa-miR-106b-5p	NM_001252037	RAB5B	TAAAGTGCTGACAGTGCAGAT#ATCTCCACTGTTAGCT#......((((((((((.((((#)))).)))))))))).	1805	1821	1.0	-19.5	0	0.05354	0.588	0.4554532	0.857587151875	-15.566558404643448	14	16	10	3UTR	MIRT065889	1	1
hsa-miR-106b-5p	NM_001261816	PDPK1	TAAAGTGCTGACAGTGCAGAT#CACTGTGAGCATTTTGC#(((((((((.((((((.....#)))))).))))))))).	4601	4618	1.0	-20.1	1	0.001144348	0.471	0.011637755555555598	-0.07502301374999998	-5.180080914529843	15	17	9	3UTR	MIRT506283	0	0
hsa-miR-106b-5p	NM_001261839	TTPAL	TAAAGTGCTGACAGTGCAGAT#TCTGCATTTCAGCACTTTAG#(((((((((((.((((((((.#))))))))))))))))))).	2749	2769	1.0	-27.0	1	0.002104483	0.559	0.894680090909091	0.2597356275	-7.284377755798021	19	20	19	3UTR	MIRT044377	1	1
hsa-miR-106b-5p	NM_001267050	GPR155	TAAAGTGCTGACAGTGCAGAT#CTGTAATCTCAGCACTTTGG#(((((((((((...(((((..#)))))...))))))))))).	4056	4076	1.0	-21.6	1	0.0005305761	0.426	0.07779654545454542	0.06686606262499999	-9.430348285984671	16	20	11	3UTR	MIRT508839	0	0
hsa-miR-106b-5p	NM_001267051	GPR155	TAAAGTGCTGACAGTGCAGAT#CTGTAATCTCAGCACTTTGG#(((((((((((...(((((..#)))))...))))))))))).	3926	3946	1.0	-21.6	1	0.0005305761	0.426	0.16524127272727274	0.05183651	-9.430348285984671	16	20	11	3UTR	MIRT508839	0	0
hsa-miR-106b-5p	NM_001271581	DNAJC10	TAAAGTGCTGACAGTGCAGAT#CTGCAGTGTTGGCAG#.....((((((((.(((((..#))))).)))))))).	9992	10007	1.0	-20.6	0	0.0002243033	0.485	0.0	0.0	-14.522439560970808	13	15	8	3UTR	MIRT524085	0	0
hsa-miR-106b-5p	NM_001271742	CSNK1A1	TAAAGTGCTGACAGTGCAGAT#GCCTGTGATTCCAGCACTTTGG#((((((((((((((.((....#)))))).....)))))))))).	4676	4698	1.0	-19.5	1	3.913266e-05	0.412	0.0	0.0	-4.6730240064523	16	22	10	3UTR	MIRT478719	1	0
hsa-miR-106b-5p	NM_001271866	GTF2H3	TAAAGTGCTGACAGTGCAGAT#CTGCAATCCCAGCACTTTGG#((((((((((....(((((..#)))))....)))))))))).	1976	1996	1.0	-21.6	1	0.0002207195	0.353	0.34874008	-0.07126963999999997	-12.25512276139502	15	20	10	3UTR	MIRT689817	0	0
hsa-miR-106b-5p	NM_001271867	GTF2H3	TAAAGTGCTGACAGTGCAGAT#CTGCAATCCCAGCACTTTGG#((((((((((....(((((..#)))))....)))))))))).	2025	2045	1.0	-21.6	1	0.0002207195	0.353	0.0	0.0	-12.25512276139502	15	20	10	3UTR	MIRT689817	0	0
hsa-miR-106b-5p	NM_001271868	GTF2H3	TAAAGTGCTGACAGTGCAGAT#CTGCAATCCCAGCACTTTGG#((((((((((....(((((..#)))))....)))))))))).	1941	1961	1.0	-21.6	1	0.0002207195	0.353	-0.4338183	0.0067126425000000045	-12.25512276139502	15	20	10	3UTR	MIRT689817	0	0
hsa-miR-106b-5p	NM_001276289	PRKAR1A	TAAAGTGCTGACAGTGCAGAT#TCTGTAATGTAGGCACTTTT#.((((((((.(((.((((((.#)))))).))).)))))))).	2800	2820	1.0	-20.3	1	0.01641083	0.765	0.34600100000000006	2.2669290574999996	-5.892671223205703	17	20	8	3UTR	MIRT535035	0	0
hsa-miR-106b-5p	NM_001276320	YOD1	TAAAGTGCTGACAGTGCAGAT#TCTGCAAATTAGCACTTTGC#(((((((((((...((((((.#))))))..))))))))))).	2382	2402	1.0	-21.1	1	0.0005822184	0.75	0.47350292727272725	0.421613775	-9.430348285984671	17	20	11	3UTR	MIRT439271	1	1
hsa-miR-106b-5p	NM_001276418	SEC16A	TAAAGTGCTGACAGTGCAGAT#CTGCACTTTCCGTGAGCACTTTT#.((((((((.(((((((((..#)))))))....)).)))))))).	8250	8273	1.0	-23.5	1	0.03491203	0.529	0.2821796615384616	0.26876204	-5.035831305685297	17	23	8	3UTR	MIRT439693	0	0
hsa-miR-106b-5p	NM_001278196	ZBTB18	TAAAGTGCTGACAGTGCAGAT#CTGCATTGTCTTTTGAGCTCTTTT#.((((.(((((((((((((..#)))))))))).....))).)))).	2230	2254	1.0	-20.4	0	0.2402263	0.676	3.3895328888888887	3.3544894875000004	-5.694283598550164	17	24	10	3UTR	MIRT064801	1	1
hsa-miR-106b-5p	NM_001282359	ZNF107	TAAAGTGCTGACAGTGCAGAT#TCTGCACTTTTAGATACTTTAG#(((((((((((.((((((((.#)))))))).)))).))))))).	5501	5523	1.0	-22.3	1	0.0278849	0.676	-0.15518916666666668	0.09033802249999996	-7.284377755798021	19	22	8	3UTR	MIRT551129	0	1
hsa-miR-106b-5p	NM_001282360	ZNF107	TAAAGTGCTGACAGTGCAGAT#TCTGCACTTTTAGATACTTTAG#(((((((((((.((((((((.#)))))))).)))).))))))).	5405	5427	1.0	-22.3	1	0.0278849	0.676	-0.15518916666666668	0.09033802249999996	-7.284377755798021	19	22	8	3UTR	MIRT551129	0	1
hsa-miR-106b-5p	NM_001282402	MIXL1	TAAAGTGCTGACAGTGCAGAT#TGCAGTGGCTCACTCCTGCAATCTCAGCACTTTGG#(((((((((((...(((((..#.)))))...))))))))))).	1333	1368	1.0	-24.0	1	0.0002382547	0.412	0.0	0.0	-9.430348285984671	16	21	11	3UTR	MIRT516561	0	0
hsa-miR-106b-5p	NM_001282602	PTGES3	TAAAGTGCTGACAGTGCAGAT#GTCCAGATTTGTATTTGCACTGTCAGTATG#....(((((((((((((((((#.))))))))))))))))).	1375	1405	1.0	-26.3	0	0.0007110105	0.676	3.724268470588236	4.94894171375	-9.546562468637928	17	19	17	3UTR	MIRT439873	0	0
hsa-miR-106b-5p	NM_001282603	PTGES3	TAAAGTGCTGACAGTGCAGAT#GTCCAGATTTGTATTTGCACTGTCAGTATG#....(((((((((((((((((#.))))))))))))))))).	1366	1396	1.0	-26.3	0	0.0007110105	0.676	3.724268470588236	4.91487588875	-9.546562468637928	17	19	17	3UTR	MIRT439873	0	0
hsa-miR-106b-5p	NM_001282860	GON4L	TAAAGTGCTGACAGTGCAGAT#TGTGGACTTTTTCAGCACTTTT#.((((((((((.(((.((.(.#).)).)))...)))))))))).	7681	7703	1.0	-19.0	1	0.08782689	0.662	0.05808215999999997	1.1002677459659094	-7.373177227257086	16	22	10	3UTR	MIRT044248	0	1
hsa-miR-106b-5p	NM_001284214	TRIP12	TAAAGTGCTGACAGTGCAGAT#GTCTGCCTGTTACAGCAA#.....(((((((((.((((((#))))))))))..))))).	6321	6339	1.0	-19.4	0	0.002941425	0.662	6.129715363636365	5.58873114625	-14.401049203701035	15	18	10	3UTR	MIRT044332	0	0
hsa-miR-106b-5p	NM_001284216	TRIP12	TAAAGTGCTGACAGTGCAGAT#GTCTGCCTGTTACAGCAA#.....(((((((((.((((((#))))))))))..))))).	5367	5385	1.0	-19.4	0	0.002941425	0.662	5.461739454545454	5.05509896625	-14.401049203701035	15	18	10	3UTR	MIRT044332	0	0
hsa-miR-106b-5p	NM_001284267	EFCAB11	TAAAGTGCTGACAGTGCAGAT#GTTTGAAGCTTCAGTGAGCCATGATTGCACTGTCGCACTC#...(((((.((((((((((..#.))))))))))))))).	1309	1349	1.0	-23.5	0	0.0002019496	0.485	0.0	0.0	-7.570929851924502	15	17	15	3UTR	MIRT509747	0	0
hsa-miR-106b-5p	NM_001284269	EFCAB11	TAAAGTGCTGACAGTGCAGAT#GTTTGAAGCTTCAGTGAGCCATGATTGCACTGTCGCACTC#...(((((.((((((((((..#.))))))))))))))).	1446	1486	1.0	-23.5	0	0.0002019496	0.485	-0.199742014	-0.13300788149999998	-7.570929851924502	15	17	15	3UTR	MIRT509747	0	0
hsa-miR-106b-5p	NM_001286095	TMEM9B	TAAAGTGCTGACAGTGCAGAT#TTTGCACTGACTGTATTATCTGGGTATCTGCTGTGTCTGCACTTC#..((((((.((((..((((((#.))))))..)))).)))))).	1093	1138	1.0	-23.2	1	0.001205851	0.544	1.0523320499999997	2.5250401700000005	-7.605679855389093	16	21	6	3UTR	MIRT450191	0	1
hsa-miR-106b-5p	NM_001286455	SLC22A23	TAAAGTGCTGACAGTGCAGAT#CTGGTCCAACGAAGACACTGCTCAGCACTTC#..((((((((((((((.....#.))))).))))))))).	3936	3967	1.0	-21.4	1	0.002965068	0.544	0.6043752533333333	0.14942541124999997	-4.95700071937229	14	17	9	3UTR	MIRT467900	1	1
hsa-miR-106b-5p	NM_001286812	LYSMD3	TAAAGTGCTGACAGTGCAGAT#TTGCACTGTTAGATCA#....(..((((((((((((..#))))))))))))..).	3988	4004	1.0	-19.8	0	0.0001562104	0.721	1.4909684	2.334012022499999	-12.991207764702295	13	16	12	3UTR	MIRT097653	1	0
hsa-miR-106b-5p	NM_001287044	VEGFA	TAAAGTGCTGACAGTGCAGAT#TCTGCGCAGAGCACTTTGG#(((((((((....(((((((.#)))))))..))))))))).	810	829	1.0	-22.0	1	0.00375543	0.397	0.0	0.0	-12.640789312202793	16	19	9	3UTR	MIRT004466	1	1
hsa-miR-106b-5p	NM_001288622	ICA1L	TAAAGTGCTGACAGTGCAGAT#ATTTGCAGCTGTTGGTACTA#...((((((((((((((((((#))))))).))))))))))).	1790	1810	1.0	-22.2	0	0.00231584	0.647	-0.1272807315789474	0.05909041375000004	-6.514540193678739	18	20	11	3UTR	MIRT662413	0	0
hsa-miR-106b-5p	NM_001289161	MICB	TAAAGTGCTGACAGTGCAGAT#CTGCCTGGATCTCACCAGCACTTTC#.(((((((((.(((.((((..#)))))))........))))))))).	1104	1129	1.0	-18.7	1	0.3638509	0.5	0.11313998888888893	-0.24880191250000003	-7.353548873018103	16	25	9	3UTR	MIRT100281	0	0
hsa-miR-106b-5p	NM_001290072	ENPP5	TAAAGTGCTGACAGTGCAGAT#CTGTATTATTGAAATGTCAGCATA#....(((((((((((((((..#))))))........))))))))).	3587	3611	1.0	-18.7	0	0.004787039	0.647	0.6536696391304347	0.08867465312499995	-9.546562468637928	15	24	9	3UTR	MIRT548399	1	1
hsa-miR-106b-5p	NM_018566	YOD1	TAAAGTGCTGACAGTGCAGAT#TCTGCAAATTAGCACTTTGC#(((((((((((...((((((.#))))))..))))))))))).	2351	2371	1.0	-21.1	1	0.0005822184	0.75	0.14423685454545454	0.4588032125000001	-9.430348285984671	17	20	11	3UTR	MIRT439271	1	1
hsa-miR-106b-5p	NM_018981	DNAJC10	TAAAGTGCTGACAGTGCAGAT#CTGCAGTGTTGGCAG#.....((((((((.(((((..#))))).)))))))).	10130	10145	1.0	-20.6	0	0.0002243033	0.485	-0.08005312499999999	-0.04976395274999999	-14.522439560970808	13	15	8	3UTR	MIRT524085	0	0
hsa-miR-106b-5p	NM_020198	CCDC47	TAAAGTGCTGACAGTGCAGAT#ATCTGCACGAGCACTTA#..(((((((....((((((((#)))))))).))))))).	2717	2734	1.0	-19.6	1	0.0001079529	0.559	4.08455625	4.533861097499999	-13.660215585373416	15	17	8	3UTR	MIRT044362	0	0
hsa-miR-106b-5p	NM_020327	ACVR1B	TAAAGTGCTGACAGTGCAGAT#GCATTCTCGGTACTTC#..(((((((((.(((((....#))))).))))))))).	4329	4345	1.0	-18.0	1	0.006531023	0.574	3.530654444444444	2.717906845	-8.303804028968646	14	16	9	3UTR	MIRT065674	1	0
hsa-miR-106b-5p	NM_020328	ACVR1B	TAAAGTGCTGACAGTGCAGAT#GCATTCTCGGTACTTC#..(((((((((.(((((....#))))).))))))))).	4468	4484	1.0	-18.0	1	0.006531023	0.574	3.530654444444444	2.717906845	-8.303804028968646	14	16	9	3UTR	MIRT065674	1	0
hsa-miR-106b-5p	NM_020390	EIF5A2	TAAAGTGCTGACAGTGCAGAT#TCTGTACCAGCGCTTTAT#((((((((((...(((((((.#))))))))))))))))).	3532	3550	1.0	-21.9	1	0.08102562	0.618	0.057836178999999974	0.5146186365	-11.398282843874613	17	18	17	3UTR	MIRT020474	1	1
hsa-miR-106b-5p	NM_020772	NUFIP2	TAAAGTGCTGACAGTGCAGAT#TCTGAGAACCCTAGTGCCCCATCATATTAACTGTCAGTATTTTGG#(((((((((((((((......#.))))))))))))))).	4880	4925	1.0	-20.3	1	0.03770913	0.603	0.49333222	0.6138348587500001	-4.1706235265052785	15	17	15	3UTR	MIRT506380	1	1
hsa-miR-106b-5p	NM_020814	MARCHF4	TAAAGTGCTGACAGTGCAGAT#CACTGTCAAGTACTTTT#.(((((((((((((((.....#)))))))).))))))).	4799	4816	1.0	-19.4	1	0.01507004	0.706	1.4574415625000001	1.4138980937499999	-3.793324837357118	15	17	8	3UTR	MIRT448676	1	0
hsa-miR-106b-5p	NM_020921	NIN	TAAAGTGCTGACAGTGCAGAT#TTGCTATTGTCAGCATCTTAA#(((.(((((((((((((((..#)))).))))))))))).))).	9754	9775	1.0	-21.0	0	0.01724041	0.603	2.4781115	2.4719901175000007	-6.969596721160855	18	21	11	3UTR	MIRT472170	1	1
hsa-miR-106b-5p	NM_020922	WNK3	TAAAGTGCTGACAGTGCAGAT#CACTGTCAAGTTGCACTTTAC#((((((((((((((((.....#))))))))....)))))))).	7346	7367	1.0	-20.3	1	0.0001408387	0.574	0.98393521	1.2204472499999999	-3.937574446201665	16	21	8	3UTR	MIRT448316	1	1
hsa-miR-106b-5p	NM_021035	ZNFX1	TAAAGTGCTGACAGTGCAGAT#CTGCGCTAGAGTAAGCACTTTAT#(((((((((.(((((((((..#)))))))...)).))))))))).	6311	6334	1.0	-22.3	1	0.0009771084	0.603	3.765166075	3.3223246850000003	-5.180080914529843	18	23	9	3UTR	MIRT439176	1	1
hsa-miR-106b-5p	NM_021167	GATAD1	TAAAGTGCTGACAGTGCAGAT#CTGTAATTGCAGCACTTTT#.(((((((((.((((((((..#))))).)))))))))))).	1372	1391	1.0	-20.4	1	0.0263238	0.426	-0.2059841111111111	0.033161295500000014	-6.618099312767468	17	19	12	3UTR	MIRT680380	0	0
hsa-miR-106b-5p	NM_021244	RRAGD	TAAAGTGCTGACAGTGCAGAT#CTGCGCCATGTTGCACTA#...(((((.((((((((((..#))))))..))))))))).	1532	1550	1.0	-18.7	0	0.001471395	0.485	0.4155111000000001	0.40179177000000005	-7.570929851924502	15	18	9	3UTR	MIRT521307	1	1
hsa-miR-106b-5p	NM_021572	ENPP5	TAAAGTGCTGACAGTGCAGAT#CTGTATTATTGAAATGTCAGCATA#....(((((((((((((((..#))))))........))))))))).	3525	3549	1.0	-18.7	0	0.004787039	0.647	0.6450717695652175	1.6857400087500003	-9.546562468637928	15	24	9	3UTR	MIRT548399	1	1
hsa-miR-106b-5p	NM_021643	TRIB2	TAAAGTGCTGACAGTGCAGAT#TCTGCCTCAAACACACATCCTGGCATCGCACTGTTAGCATTTA#..(((((((((((((((.(((#.)))))))))))))))))).	2743	2786	1.0	-25.2	1	0.04828121	0.559	1.2896926533333335	1.4291584325	-4.95700071937229	18	20	18	3UTR	MIRT044275	0	0
hsa-miR-106b-5p	NM_021904	GABBR1	TAAAGTGCTGACAGTGCAGAT#CTGCACATTGTTATGCACTTTT#.((((((((((((((((((..#))))))..))))).))))))).	3951	3973	1.0	-22.1	1	0.04838256	0.515	1.1301655666666668	1.739394725	-3.793324837357118	18	22	7	3UTR	MIRT440596	0	0
hsa-miR-106b-5p	NM_021945	SLC22A23	TAAAGTGCTGACAGTGCAGAT#CTGGTCCAACGAAGACACTGCTCAGCACTTC#..((((((((((((((.....#.))))).))))))))).	4181	4212	1.0	-21.4	1	0.002965068	0.544	3.3202606666666665	3.400196846249999	-4.95700071937229	14	17	9	3UTR	MIRT467900	1	1
hsa-miR-106b-5p	NM_022344	C17orf75	TAAAGTGCTGACAGTGCAGAT#TCATGCCTGTAATCCCAGCACTTTGA#((((((((((((((.(((((.#)).))))))).....)))))))))).	2861	2887	1.0	-20.7	1	0.01445638	0.412	0.18946903684210525	0.5288396975000001	-4.6730240064523	19	26	10	3UTR	MIRT783070	0	0
hsa-miR-106b-5p	NM_022445	TPK1	TAAAGTGCTGACAGTGCAGAT#GCATTTTCGGCACTTTT#.((((((((((.(((((....#))))).)))))))))).	2211	2228	1.0	-20.7	1	0.006308969	0.515	2.31262919	2.05644702	-7.140128146953473	15	17	10	3UTR	MIRT525490	0	0
hsa-miR-106b-5p	NM_022483	TMEM267	TAAAGTGCTGACAGTGCAGAT#CTGCACTGCAGCCTG#...((.((((.((((((((..#)))))))))))))).	2655	2670	1.0	-22.5	0	3.309817e-05	0.5	0.5871460374999999	0.6338901775000003	-11.240273430282135	14	15	14	3UTR	MIRT441045	0	1
hsa-miR-106b-5p	NM_022716	PRRX1	TAAAGTGCTGACAGTGCAGAT#CTGTATTCTCTGTATGTCCAGCACTTTGT#(((((((((((((.((((((.#.)))))))))).))))))))).	2500	2529	1.0	-23.4	1	0.007311883	0.603	0.6357366142857144	1.0881316337500002	-4.794414363722071	19	22	10	3UTR	MIRT732202	1	1
hsa-miR-106b-5p	NM_022977	ACSL4	TAAAGTGCTGACAGTGCAGAT#GTGCTGCAGGGCTTTAA#((((((.(((.((((((....#))))))))).)))))).	2948	2965	1.0	-19.7	0	0.001324046	0.632	4.355350666666667	4.6013872849999995	-8.306035456483334	15	17	9	3UTR	MIRT175384	1	1
hsa-miR-106b-5p	NM_024106	ZNF426	TAAAGTGCTGACAGTGCAGAT#GTCTGTGCTTCTGCACTG#...(((((.((.(((((((((#))))))))))).))))).	4218	4236	1.0	-19.7	0	7.941929e-06	0.559	-0.7175035777777778	-0.6532196450000001	-10.917733161520857	16	18	11	3UTR	MIRT685801	0	0
hsa-miR-106b-5p	NM_024331	TTPAL	TAAAGTGCTGACAGTGCAGAT#TCTGCATTTCAGCACTTTAG#(((((((((((.((((((((.#))))))))))))))))))).	2875	2895	1.0	-27.0	1	0.002104483	0.559	0.894680090909091	0.2597356275	-7.284377755798021	19	20	19	3UTR	MIRT044377	1	1
hsa-miR-106b-5p	NM_024607	PPP1R3B	TAAAGTGCTGACAGTGCAGAT#TGCCTGTAATCCCAGCACTTTGG#((((((((((((((.(((...#))))))).....)))))))))).	1935	1958	1.0	-20.2	1	3.716151e-05	0.368	0.0	0.0	-4.6730240064523	17	23	10	3UTR	MIRT439917	1	1
hsa-miR-106b-5p	NM_024852	AGO3	TAAAGTGCTGACAGTGCAGAT#TCATGCCTGTAATCCCAGCACTTTGG#((((((((((((((.(((((.#)).))))))).....)))))))))).	16950	16976	1.0	-20.7	1	3.245587e-06	0.412	0.10633357736842104	-0.016975661500000017	-4.6730240064523	19	26	10	3UTR	MIRT524986	1	0
hsa-miR-106b-5p	NM_031268	PDPK1	TAAAGTGCTGACAGTGCAGAT#CACTGTGAGCATTTTGC#(((((((((.((((((.....#)))))).))))))))).	4431	4448	1.0	-20.1	1	0.001144348	0.471	0.011637755555555598	-0.07502301374999998	-5.180080914529843	15	17	9	3UTR	MIRT506283	0	0
hsa-miR-106b-5p	NM_001144884	SLC30A7	TAAAGTGCTGACAGTGCAGAT#ATCTGGAATTTGTCAGCATTC#...(((((((((((..(((((#)))))....))))))))))).	4342	4363	1.0	-20.0	0	0.001721949	0.618	0.022539045454545447	0.08951181375	-7.483038834232987	16	21	11	3UTR	MIRT057826	1	1
hsa-miR-106b-5p	NM_001145078	ZNF805	TAAAGTGCTGACAGTGCAGAT#TGTGCACTGTCGCCACC#....(((.((((((((((.(.#).)))))))))).))).	7686	7703	1.0	-20.8	0	0.02421152	0.529	-0.10106140999999998	-0.06997110999999999	-11.86019739781856	14	17	10	3UTR	MIRT201023	1	1
hsa-miR-106b-5p	NM_001145319	PLS1	TAAAGTGCTGACAGTGCAGAT#ATCTTCCACTGTTAGTGCC#....((((((((((((.((((#))))..)))))))))))).	3286	3305	1.0	-18.8	0	0.008010422	0.603	0.34447209999999995	0.46151452375000007	-9.546562468637928	16	19	12	3UTR	MIRT020466	1	1
hsa-miR-106b-5p	NM_001145365	ZNF652	TAAAGTGCTGACAGTGCAGAT#GTCTGTACTGGATGTGCC#....((((...((((((((((#))))))))))...)))).	9483	9501	1.0	-18.6	0	0.0008417265	0.574	1.8547394800000003	2.106127705	-14.67023307062222	14	18	10	3UTR	MIRT484886	1	1
hsa-miR-106b-5p	NM_001160147	DDHD1	TAAAGTGCTGACAGTGCAGAT#CTGTTACAGTATCATGTCAGCATTTA#..(((((((((((((((....#.))))..))))))))))).	7132	7158	1.0	-18.3	1	0.04656175	0.662	-0.23123529411764712	0.6292499999999999	-4.95700071937229	15	19	11	3UTR	MIRT440841	1	1
hsa-miR-106b-5p	NM_001160148	DDHD1	TAAAGTGCTGACAGTGCAGAT#CTGTTACAGTATCATGTCAGCATTTA#..(((((((((((((((....#.))))..))))))))))).	7195	7221	1.0	-18.3	1	0.04656175	0.662	1.0374117647058823	1.091075	-4.95700071937229	15	19	11	3UTR	MIRT440841	1	1
hsa-miR-106b-5p	NM_001164283	TRAF3IP2	TAAAGTGCTGACAGTGCAGAT#TCTCACGCCTGTAATCCCAGCACTTTGG#((((((((((....(((((..#.)))))....)))))))))).	2092	2120	1.0	-20.0	1	0.0001960785	0.5	-0.7077639	-0.2710906874999999	-12.25512276139502	15	21	10	3UTR	MIRT686545	0	0
hsa-miR-106b-5p	NM_001166293	SSX2IP	TAAAGTGCTGACAGTGCAGAT#CTGTACTGGCAGTTCAGCCGCTTA#..(((((((((((((((((..#)))))))).....))))).)))).	3343	3367	1.0	-20.2	1	8.258914e-05	0.5	3.6078869130434787	2.919804374999999	-4.95700071937229	17	24	8	3UTR	MIRT439534	1	1
hsa-miR-106b-5p	NM_001167	XIAP	TAAAGTGCTGACAGTGCAGAT#ATCCTCAGTTCTTCACCTTTGCACTGTCTGCCACTTA#..((((((.(((((((((((.#.))))))))))).)).)))).	3988	4025	1.0	-23.7	1	0.00759827	0.647	0.6599282	0.37168799924999996	-6.013390377618052	17	21	11	3UTR	MIRT108722	1	1
hsa-miR-106b-5p	NM_001167942	TNFAIP8L1	TAAAGTGCTGACAGTGCAGAT#CTGCACTTCAGCCTG#...((.(((((.(((((((..#)))))))))))))).	2009	2024	1.0	-20.3	0	4.192444e-05	0.485	0.1809182857142857	0.006125959999999965	-11.76230226446814	14	15	14	3UTR	MIRT530005	0	0
hsa-miR-106b-5p	NM_001168344	RREB1	TAAAGTGCTGACAGTGCAGAT#TCCAGTCTGTCAGCATTA#...(((((((((((....((.#))....))))))))))).	6043	6061	1.0	-17.7	0	0.02167548	0.559	0.8392122727272727	0.9697853112500001	-7.483038834232987	13	18	11	3UTR	MIRT044319	0	0
hsa-miR-106b-5p	NM_001171622	VEGFA	TAAAGTGCTGACAGTGCAGAT#TCTGCGCAGAGCACTTTGG#(((((((((....(((((((.#)))))))..))))))))).	1616	1635	1.0	-22.0	1	0.00375543	0.397	4.764139999999999	3.1504124124999997	-12.640789312202793	16	19	9	3UTR	MIRT004466	1	1
hsa-miR-106b-5p	NM_001171623	VEGFA	TAAAGTGCTGACAGTGCAGAT#TCTGCGCAGAGCACTTTGG#(((((((((....(((((((.#)))))))..))))))))).	1901	1920	1.0	-22.0	1	0.00375543	0.397	4.383947777777779	3.23282585	-12.640789312202793	16	19	9	3UTR	MIRT004466	1	1
hsa-miR-106b-5p	NM_001171624	VEGFA	TAAAGTGCTGACAGTGCAGAT#TCTGCGCAGAGCACTTTGG#(((((((((....(((((((.#)))))))..))))))))).	1850	1869	1.0	-22.0	1	0.00375543	0.397	4.383947777777779	3.23282585	-12.640789312202793	16	19	9	3UTR	MIRT004466	1	1
hsa-miR-106b-5p	NM_001171625	VEGFA	TAAAGTGCTGACAGTGCAGAT#TCTGCGCAGAGCACTTTGG#(((((((((....(((((((.#)))))))..))))))))).	1832	1851	1.0	-22.0	1	0.00375543	0.397	4.383947777777779	3.23282585	-12.640789312202793	16	19	9	3UTR	MIRT004466	1	1
hsa-miR-106b-5p	NM_001171626	VEGFA	TAAAGTGCTGACAGTGCAGAT#TCTGCGCAGAGCACTTTGG#(((((((((....(((((((.#)))))))..))))))))).	1778	1797	1.0	-22.0	1	0.00375543	0.397	4.383947777777779	3.23282585	-12.640789312202793	16	19	9	3UTR	MIRT004466	1	1
hsa-miR-106b-5p	NM_001171627	VEGFA	TAAAGTGCTGACAGTGCAGAT#TCTGCGCAGAGCACTTTGG#(((((((((....(((((((.#)))))))..))))))))).	1743	1762	1.0	-22.0	1	0.00375543	0.397	4.383947777777779	3.23282585	-12.640789312202793	16	19	9	3UTR	MIRT004466	1	1
hsa-miR-106b-5p	NM_001171628	VEGFA	TAAAGTGCTGACAGTGCAGAT#TCTGCGCAGAGCACTTTGG#(((((((((....(((((((.#)))))))..))))))))).	1646	1665	1.0	-22.0	1	0.00375543	0.397	4.383947777777779	3.23282585	-12.640789312202793	16	19	9	3UTR	MIRT004466	1	1
hsa-miR-106b-5p	NM_001171629	VEGFA	TAAAGTGCTGACAGTGCAGAT#TCTGCGCAGAGCACTTTGG#(((((((((....(((((((.#)))))))..))))))))).	1712	1731	1.0	-22.0	1	0.00375543	0.397	4.383947777777779	3.23282585	-12.640789312202793	16	19	9	3UTR	MIRT004466	1	1
hsa-miR-106b-5p	NM_001171630	VEGFA	TAAAGTGCTGACAGTGCAGAT#TCTGCGCAGAGCACTTTGG#(((((((((....(((((((.#)))))))..))))))))).	1616	1635	1.0	-22.0	1	0.00375543	0.397	4.383947777777779	3.23282585	-12.640789312202793	16	19	9	3UTR	MIRT004466	1	1
hsa-miR-106b-5p	NM_001172312	PLS1	TAAAGTGCTGACAGTGCAGAT#ATCTTCCACTGTTAGTGCC#....((((((((((((.((((#))))..)))))))))))).	3453	3472	1.0	-18.8	0	0.008010422	0.603	0.34447209999999995	0.46151452375000007	-9.546562468637928	16	19	12	3UTR	MIRT020466	1	1
hsa-miR-106b-5p	NM_001174088	NCOA3	TAAAGTGCTGACAGTGCAGAT#ATGTGCAGCTGAGTGCACTTTAT#((((((((...(((((((.((#)).)))).)))...)))))))).	5178	5201	1.0	-19.0	1	0.003466506	0.691	4.87148625	2.0852371637499996	-9.06124504818596	17	23	8	3UTR	MIRT153621	1	1
hsa-miR-106b-5p	NM_001178005	BHMT2	TAAAGTGCTGACAGTGCAGAT#CTGCAATCCCAGCACTTTGG#((((((((((....(((((..#)))))....)))))))))).	1533	1553	1.0	-21.6	1	7.141115e-05	0.368	-0.06995121999999998	-0.24789295499999975	-12.25512276139502	15	20	10	3UTR	MIRT685727	0	0
hsa-miR-106b-5p	NM_001190737	NFIB	TAAAGTGCTGACAGTGCAGAT#GTCTCCAACCATCAGTTCCGTGGCACTGTTCAGCCTTTGT#(((((.(((((((((((....#.))))))).))))))))).	5775	5815	1.0	-22.1	0	0.0004924532	0.426	3.318800833333334	2.4421816287499998	-5.838533207394711	16	19	9	3UTR	MIRT472286	1	1
hsa-miR-106b-5p	NM_004859	CLTC	TAAAGTGCTGACAGTGCAGAT#ATCATGCACTTAGCACTG#...(((((((..(((((((((#))).))))))))))))).	7541	7559	1.0	-18.8	0	0.000282074	0.603	0.471194295	0.956092663125	-12.686117978685445	16	18	13	3UTR	MIRT044262	0	0
hsa-miR-106b-5p	NM_004896	VPS26A	TAAAGTGCTGACAGTGCAGAT#CTGCACTGTAGCT#......(((.(((((((((..#)))))))))))).	4126	4139	1.0	-19.5	0	0.001121282	0.544	0.16457500000000003	0.0878829575	-16.80906487297163	12	13	12	3UTR	MIRT127164	1	1
hsa-miR-106b-5p	NM_004975	KCNB1	TAAAGTGCTGACAGTGCAGAT#GTCTGCCTGTTAGTACA#....((((((((((.((((((#)))))))))))))))).	4650	4667	1.0	-24.3	0	0.0002227295	0.559	2.5219608000000004	2.402620362999999	-10.282012028888563	16	17	16	3UTR	MIRT567058	1	1
hsa-miR-106b-5p	NM_004975	KCNB1	TAAAGTGCTGACAGTGCAGAT#GTCTGCCTGTCTGTAGTACA#....((((((((((.((((((#)))))))))))...))))).	4465	4485	1.0	-20.7	0	0.005880806	0.662	0.40127230769230765	0.72374731	-10.282012028888563	16	20	11	3UTR	MIRT567058	1	1
hsa-miR-106b-5p	NM_004992	MECP2	TAAAGTGCTGACAGTGCAGAT#CTGTGCTGTTAGCATTC#...((((((((((((((((..#)))))))))))))))).	10425	10442	1.0	-24.4	0	5.113663e-05	0.609	2.21511125	2.8356689022058825	-6.514540193678739	16	17	16	3UTR	MIRT440262	1	1
hsa-miR-106b-5p	NM_005160	GRK3	TAAAGTGCTGACAGTGCAGAT#CTGGCTGTGTTAGCACTG#...((((((((((..((((..#))).)..)))))))))).	7476	7494	1.0	-19.2	0	0.0002766084	0.529	-0.3978408	-0.3776675262500001	-8.10682967144978	14	18	10	3UTR	MIRT400049	0	0
hsa-miR-106b-5p	NM_005338	HIP1	TAAAGTGCTGACAGTGCAGAT#ATCTGCACAGTCAGA#.......(((((.((((((((#)))))))).))))).	3651	3666	1.0	-20.0	0	0.003622169	0.456	0.44829175	0.3818259315	-18.39937555218101	13	15	8	3UTR	MIRT634652	0	0
hsa-miR-106b-5p	NM_005342	HMGB3	TAAAGTGCTGACAGTGCAGAT#TCTTCATTGTCAGCAA#.....(((((((((((.(((.#))).))))))))))).	1350	1366	1.0	-20.1	0	0.02868666	0.676	1.7257180909090906	2.269368840000001	-13.6655996434504	14	16	11	3UTR	MIRT020449	1	1
hsa-miR-106b-5p	NM_005433	YES1	TAAAGTGCTGACAGTGCAGAT#TCGTACTGTGAGTATTG#...((((((.(((((((.((.#))))))))).)))))).	2646	2663	1.0	-18.0	0	0.003114867	0.588	1.9578297142857142	1.5244523065	-7.757046662006918	15	17	9	3UTR	MIRT044267	1	1
hsa-miR-106b-5p	NM_005542	INSIG1	TAAAGTGCTGACAGTGCAGAT#TGAAGATGTCAGCATTTTAT#(((((((((((((...((...#))....))))))))))))).	2549	2569	1.0	-18.3	1	0.004513223	0.721	0.26714977	0.520521681875	-5.762913004276319	15	20	13	3UTR	MIRT044329	0	0
hsa-miR-106b-5p	NM_005722	ACTR2	TAAAGTGCTGACAGTGCAGAT#CTGTACTGCTGCAGCTTTAA#((((((((.(.((((((((..#))))))))).))).))))).	1740	1760	1.0	-19.7	1	1.169912e-05	0.574	0.16071861375000002	0.5420510329999999	-7.8187385798577775	17	20	9	3UTR	MIRT512324	0	0
hsa-miR-106b-5p	NM_005826	HNRNPR	TAAAGTGCTGACAGTGCAGAT#TTGCACTGCGGACTTTAG#((((((.(((.((((((((..#))))))))))))))))).	3110	3128	1.0	-20.2	0	0.0001445782	0.603	0.0907088375	0.6841219225	-8.306035456483334	17	18	17	3UTR	MIRT506993	0	0
hsa-miR-106b-5p	NM_005859	PURA	TAAAGTGCTGACAGTGCAGAT#TTTGTAGAGTTGGCACTTTAG#((((((((((((..((((((.#))))))..)))))))))))).	8957	8978	1.0	-21.8	1	0.002090335	0.75	1.1309951500000002	0.859390625375	-6.083544976388314	18	21	12	3UTR	MIRT007004	1	1
hsa-miR-106b-5p	NM_005911	MAT2A	TAAAGTGCTGACAGTGCAGAT#GTCTGGCAATGCCACAGCCCTGTCAGCATG#....((((((((((.((....#.)).)))))))))).	1717	1747	1.0	-20.1	0	0.002918432	0.559	2.1031950000000004	2.4678488875	-10.282012028888563	12	15	10	3UTR	MIRT044305	0	0
hsa-miR-106b-5p	NM_005931	MICB	TAAAGTGCTGACAGTGCAGAT#CTGCCTGGATCTCACCAGCACTTTC#.(((((((((.(((.((((..#)))))))........))))))))).	1233	1258	1.0	-18.7	1	0.3638509	0.5	0.030040988888888898	-0.13179858374999998	-7.353548873018103	16	25	9	3UTR	MIRT100281	0	0
hsa-miR-106b-5p	NM_005955	MTF1	TAAAGTGCTGACAGTGCAGAT#CTGCACTGTATGTCACTTTT#.(((((((..(((((((((..#)))))))))..).)))))).	2616	2636	1.0	-22.9	1	0.03250234	0.632	-0.010959688888888895	0.23081024125000005	-6.09222096393106	16	20	9	3UTR	MIRT440209	1	1
hsa-miR-106b-5p	NM_005962	MXI1	TAAAGTGCTGACAGTGCAGAT#CTGCATTGTTAGCACTA#...((((((((((((((((..#)))))))))))))))).	1571	1588	1.0	-27.7	0	0.01571085	0.471	1.8237409375000002	1.8107792749999996	-6.514540193678739	16	17	16	3UTR	MIRT020453	1	1
hsa-miR-106b-5p	NM_006076	AGFG2	TAAAGTGCTGACAGTGCAGAT#GCTCCTGTCAAGCACTTTAG#((((((((((((((.((....#))..)))))).)))))))).	2163	2183	1.0	-21.9	1	0.01861216	0.471	2.114424	1.0976908124999998	-4.6730240064523	16	20	8	3UTR	MIRT169669	1	1
hsa-miR-106b-5p	NM_006076	AGFG2	TAAAGTGCTGACAGTGCAGAT#TTGCCTGTGGGCATTTC#..(((((((.((((.((((..#)))))))).))))))).	1660	1677	1.0	-19.6	1	9.752439e-07	0.426	0.4885564285714286	0.825334725	-6.934956747951103	15	17	8	3UTR	MIRT169669	1	1
hsa-miR-106b-5p	NM_006139	CD28	TAAAGTGCTGACAGTGCAGAT#ATTTGCACTGCCAGCT#......((((.((((((((((#)))))))))).)))).	4099	4115	1.0	-20.7	0	0.0008700646	0.5	-0.012609780000000015	0.06237408249999994	-18.3913328800538	14	16	10	3UTR	MIRT684937	0	0
hsa-miR-106b-5p	NM_006141	DYNC1LI2	TAAAGTGCTGACAGTGCAGAT#CTGGTCTGATCAGTGCTA#...(((((((((((..(((..#)))..))).)))))))).	2583	2601	1.0	-17.6	0	0.0001035125	0.588	1.3368045833333333	1.6061081575	-7.483038834232987	14	18	8	3UTR	MIRT440760	1	1
hsa-miR-106b-5p	NM_006482	DYRK2	TAAAGTGCTGACAGTGCAGAT#GCACTGTAGGGCTTTT#.(((((.((.(((((((....#))))))))).))))).	4567	4583	1.0	-19.1	0	0.002501115	0.676	0.4286637142857143	1.49611407	-6.5795178405566155	14	16	9	3UTR	MIRT188187	1	0
hsa-miR-106b-5p	NM_006505	PVR	TAAAGTGCTGACAGTGCAGAT#ATGTGTACTGTCACCACG#....(((.((((((((((.((#)).)))))))))).))).	3265	3283	1.0	-20.4	0	0.001072897	0.485	-0.45804287000000005	0.05723948749999999	-11.86019739781856	15	18	10	3UTR	MIRT293649	0	0
hsa-miR-106b-5p	NM_006534	NCOA3	TAAAGTGCTGACAGTGCAGAT#ATGTGCAGCTGAGTGCACTTTAT#((((((((...(((((((.((#)).)))).)))...)))))))).	5193	5216	1.0	-19.0	1	0.003466506	0.691	4.87148625	2.0852371637499996	-9.06124504818596	17	23	8	3UTR	MIRT153621	1	1
hsa-miR-106b-5p	NM_006538	BCL2L11	TAAAGTGCTGACAGTGCAGAT#TCTGGTTGCAGGCTTTCCCATGGTCACAGGATGCACTGTCAGCATC#....((((((((((((((...#.)))))))))))))).	1702	1748	1.0	-26.1	0	0.0002937184	0.412	-0.4862677071428573	-0.537208035	-9.546562468637928	14	16	14	3UTR	MIRT004571	1	1
hsa-miR-106b-5p	NM_006601	PTGES3	TAAAGTGCTGACAGTGCAGAT#GTCCAGATTTGTATTTGCACTGTCAGTATG#....(((((((((((((((((#.))))))))))))))))).	1465	1495	1.0	-26.3	0	0.0007110105	0.676	3.724268470588236	4.94894171375	-9.546562468637928	17	19	17	3UTR	MIRT439873	0	0
hsa-miR-106b-5p	NM_006626	ZBTB6	TAAAGTGCTGACAGTGCAGAT#CTGCAGTCGGTACA#....((((((((..(((((..#))))))))))))).	2242	2256	1.0	-18.7	0	0.003514669	0.544	0.4851579749999999	0.10341187625000003	-11.692532998824579	13	14	13	3UTR	MIRT439258	1	1
hsa-miR-106b-5p	NM_006745	MSMO1	TAAAGTGCTGACAGTGCAGAT#TTGCAGTGCAGTACTG#...(((((((.((.(((((..#))))).))))))))).	1903	1919	1.0	-19.4	0	0.0002771586	0.588	-0.2281039857142857	0.21527148250000003	-10.196154586609497	14	16	9	3UTR	MIRT164529	1	0
hsa-miR-106b-5p	NM_006902	PRRX1	TAAAGTGCTGACAGTGCAGAT#CTGTATTCTCTGTATGTCCAGCACTTTGT#(((((((((((((.((((((.#.)))))))))).))))))))).	2572	2601	1.0	-23.4	1	0.007311883	0.603	0.6357366142857144	1.0881316337500002	-4.794414363722071	19	22	10	3UTR	MIRT732202	1	1
hsa-miR-106b-5p	NM_007045	CEP43	TAAAGTGCTGACAGTGCAGAT#ATCTGTGTTGTAGCATTTGTCAGTACTTC#..(((((((((((((((....#.))))).)))))))))).	10755	10784	1.0	-20.9	1	0.07922798	0.676	-0.06104187499999998	-0.019531950000000006	-4.95700071937229	15	18	10	3UTR	MIRT567549	0	1
hsa-miR-106b-5p	NM_007047	BTN3A2	TAAAGTGCTGACAGTGCAGAT#CACTGAAGCACTTTAC#(((((((((..(((((.....#))))).))))))))).	2753	2769	1.0	-17.9	1	0.05865482	0.632	-0.20477080000000003	-0.33070433999999993	-8.004855389940193	14	16	9	3UTR	MIRT168223	0	1
hsa-miR-106b-5p	NM_007067	KAT7	TAAAGTGCTGACAGTGCAGAT#GTCTGTAATCTCAGCACTTTGG#(((((((((((...(((((((#)))))))...))))))))))).	5507	5529	1.0	-23.8	1	9.734834e-05	0.485	-0.0005361090909091078	-0.1350588275	-9.430348285984671	18	22	11	3UTR	MIRT044356	0	0
hsa-miR-106b-5p	NM_007158	CSDE1	TAAAGTGCTGACAGTGCAGAT#TCTGCCTTAGCACTC#...(((((((..((.(((((.#)))))))))))))).	3154	3169	1.0	-16.9	0	0.001404031	0.618	6.361014571428571	5.07624646	-13.42156753893608	14	15	14	3UTR	MIRT544634	0	1
hsa-miR-106b-5p	NM_007334	KLRD1	TAAAGTGCTGACAGTGCAGAT#ATTTGGACTGGGTGTGGTGGTTTATGCCTGTAATCGCAGCACTTTGG#((((((((((((((.(((...#.))))))).....)))))))))).	1692	1739	1.0	-20.2	1	7.766114e-05	0.441	-0.010495018421052634	0.04067760812499999	-4.6730240064523	17	24	10	3UTR	MIRT713356	0	0
hsa-miR-106b-5p	NM_012199	AGO1	TAAAGTGCTGACAGTGCAGAT#TCTGCACTGTCCTGCACTC#...(((((.(((((((((((.#)))))))))))..))))).	4266	4285	1.0	-27.6	0	0.001441562	0.5	0.7198119090909091	0.7654190112500001	-7.570929851924502	16	19	11	3UTR	MIRT020459	1	1
hsa-miR-106b-5p	NM_012316	KPNA6	TAAAGTGCTGACAGTGCAGAT#TCTGCAAGGGCGCTTTGC#(((((((((.....((((((.#))))))..))))))))).	5957	5975	1.0	-18.9	1	6.191458e-05	0.574	0.77442562	0.6712446382499999	-13.4976292297232	15	18	9	3UTR	MIRT761131	0	0
hsa-miR-106b-5p	NM_013354	CNOT7	TAAAGTGCTGACAGTGCAGAT#GTCTGCCTTTCAGTACTA#...((((((((.((.((((((#)))))))).)))))))).	1260	1278	1.0	-21.4	0	0.01602636	0.603	0.027945025000000012	-0.1553813649375	-10.596793063525729	16	18	8	3UTR	MIRT044358	1	1
hsa-miR-106b-5p	NM_014028	OSTM1	TAAAGTGCTGACAGTGCAGAT#CTGTATTTGCAGCACTTTGG#((((((((((..(((((((..#)))))))..)))))))))).	3190	3210	1.0	-22.5	1	0.0003714952	0.5	0.50471472	0.7053770475000001	-10.10915223120837	17	20	10	3UTR	MIRT020467	1	1
hsa-miR-106b-5p	NM_014028	OSTM1	TAAAGTGCTGACAGTGCAGAT#CTGTCACTGTTTATGCTGCTGGAACTTAGCACTG#...((((((((((((((((..#))).)))))))................)))))).	2595	2629	1.0	-18.9	0	0.004665942	0.574	1.4324870242424241	1.1385246975000003	-6.514540193678739	16	34	7	3UTR	MIRT020467	1	1
hsa-miR-106b-5p	NM_014041	SPCS1	TAAAGTGCTGACAGTGCAGAT#GCTGTGAGCACTG#...((((((.(((((......#))))).)))))).	2607	2620	1.0	-18.2	0	0.0002592696	0.632	0.2724955	0.195826474875	-7.9900957423105305	11	13	6	3UTR	MIRT641712	0	0
hsa-miR-106b-5p	NM_014159	SETD2	TAAAGTGCTGACAGTGCAGAT#GTCTTCTCCTTGGCGGTGCTGTCAGCGCA#....(((((((((((((....#.))))))))))))).	8164	8193	1.0	-23.8	0	3.708578e-06	0.397	5.031686461538461	4.9366494475	-9.546562468637928	13	15	13	3UTR	MIRT044337	0	1
hsa-miR-106b-5p	NM_014159	SETD2	TAAAGTGCTGACAGTGCAGAT#CTGTGGGCCTTTCTGTCCCACCCCTGTCAGCACTG#...(((((((((((.(((((.#.))))).......))))))))))).	7945	7980	1.0	-22.7	0	0.02699246	0.456	3.4481036363636366	2.97656486375	-7.249989753929374	16	25	11	3UTR	MIRT044337	0	1
hsa-miR-106b-5p	NM_001470	GABBR1	TAAAGTGCTGACAGTGCAGAT#CTGCACATTGTTATGCACTTTT#.((((((((((((((((((..#))))))..))))).))))))).	4137	4159	1.0	-22.1	1	0.04838256	0.515	0.0	0.0	-3.793324837357118	18	22	7	3UTR	MIRT440596	0	0
hsa-miR-106b-5p	NM_001516	GTF2H3	TAAAGTGCTGACAGTGCAGAT#CTGCAATCCCAGCACTTTGG#((((((((((....(((((..#)))))....)))))))))).	2105	2125	1.0	-21.6	1	0.0002207195	0.353	0.0	0.0	-12.25512276139502	15	20	10	3UTR	MIRT689817	0	0
hsa-miR-106b-5p	NM_001655	ARCN1	TAAAGTGCTGACAGTGCAGAT#TCTGCACTTTTAGCT#......(((((.((((((((.#)))))))).))))).	3410	3425	1.0	-19.5	0	0.005487399	0.529	0.0	0.0	-18.9133617142398	13	15	8	3UTR	MIRT129139	0	0
hsa-miR-106b-5p	NM_001777	CD47	TAAAGTGCTGACAGTGCAGAT#ATCTGATGGCTCCTGCAGCACTTTT#.(((((((((.(((.((....#.))..)))))))))))).	2951	2976	1.0	-18.8	1	0.02157883	0.676	0.0	0.0	-7.353548873018103	14	18	12	3UTR	MIRT440977	0	0
hsa-miR-106b-5p	NM_001791	CDC42	TAAAGTGCTGACAGTGCAGAT#TCTGCACAGCTGGTGTCGGCATC#....((((((((((((((((.#)))))))......))))))))).	679	702	1.0	-22.7	0	0.0001789324	0.574	2.9920783636363635	2.5725030600000003	-9.546562468637928	16	23	9	3UTR	MIRT044369	0	0
hsa-miR-106b-5p	NM_001892	CSNK1A1	TAAAGTGCTGACAGTGCAGAT#GCCTGTGATTCCAGCACTTTGG#((((((((((((((.((....#)))))).....)))))))))).	5006	5028	1.0	-19.5	1	3.913266e-05	0.412	0.0	0.0	-4.6730240064523	16	22	10	3UTR	MIRT478719	1	0
hsa-miR-106b-5p	NM_001951	E2F5	TAAAGTGCTGACAGTGCAGAT#TTTGTGAAGTGCCTTCTGTTTTAGCACTTTAA#((((((((((((((.(((...#.)))...)))))..))))))))).	1792	1824	1.0	-18.6	1	0.009095239	0.676	4.491070562499999	4.575136916249999	-4.6730240064523	17	24	9	3UTR	MIRT053530	1	1
hsa-miR-106b-5p	NM_002039	GAB1	TAAAGTGCTGACAGTGCAGAT#ATCTCCAGTACTTTATAAAATCCCAACAATTGCTGTAAGTCAGCACTTTGG#((((((((((((..(((((..#.))))).)))))))))))).	6959	7010	1.0	-23.6	1	0.0003655233	0.529	0.0	0.0	-6.083544976388314	17	20	12	3UTR	MIRT164203	1	1
hsa-miR-106b-5p	NM_002039	GAB1	TAAAGTGCTGACAGTGCAGAT#GTGCTGCCAGCATTTTAT#((((((((((.((((((....#)))))).)))))))))).	6802	6820	1.0	-20.9	1	0.002287034	0.559	0.0	0.0	-6.7623489216120145	16	18	10	3UTR	MIRT164203	1	1
hsa-miR-106b-5p	NM_002039	GAB1	TAAAGTGCTGACAGTGCAGAT#TACTGTGAGCATTTTAG#(((((((((.((((((.....#)))))).))))))))).	5430	5447	1.0	-19.2	1	0.01637477	0.706	0.0	0.0	-5.180080914529843	15	17	9	3UTR	MIRT164203	1	1
hsa-miR-106b-5p	NM_002077	GOLGA1	TAAAGTGCTGACAGTGCAGAT#CTGTAACTGCAGTATTTTGT#((((((((((.((((((((..#))))).))))))))))))).	2711	2731	1.0	-19.5	1	0.001066969	0.647	4.535795599999999	5.347478808999998	-6.7623489216120145	18	20	13	3UTR	MIRT440545	1	1
hsa-miR-106b-5p	NM_002128	HMGB1	TAAAGTGCTGACAGTGCAGAT#CTGCGCTGAACATCTGTACA#....((((.((((((((((..#))))))))....)).)))).	5258	5278	1.0	-17.8	0	0.02627698	0.574	0.39005535714285716	0.14916693625000005	-10.602952126883691	14	20	8	3UTR	MIRT511558	0	0
hsa-miR-106b-5p	NM_002221	ITPKB	TAAAGTGCTGACAGTGCAGAT#TCAGCACTGCTTAGCATTC#...((((((((((((((.((.#)).)))))).)))))))).	5761	5780	1.0	-19.9	0	0.01274657	0.5	0.0	0.0	-6.514540193678739	16	19	8	3UTR	MIRT440418	1	1
hsa-miR-106b-5p	NM_002221	ITPKB	TAAAGTGCTGACAGTGCAGAT#CTGCACTACAAGACACTTTGT#(((((((((...(((((((..#)))))))...)).))))))).	3395	3416	1.0	-19.6	1	0.001688699	0.559	0.0	0.0	-11.35165869953655	16	21	7	3UTR	MIRT440418	1	1
hsa-miR-106b-5p	NM_002262	KLRD1	TAAAGTGCTGACAGTGCAGAT#ATTTGGACTGGGTGTGGTGGTTTATGCCTGTAATCGCAGCACTTTGG#((((((((((((((.(((...#.))))))).....)))))))))).	1785	1832	1.0	-20.2	1	7.766114e-05	0.441	0.0	0.0	-4.6730240064523	17	24	10	3UTR	MIRT713356	0	0
hsa-miR-106b-5p	NM_002481	PPP1R12B	TAAAGTGCTGACAGTGCAGAT#GCACTGACCGCACTTTAA#((((((((.(.((((((....#)))))).).)))))))).	7474	7492	1.0	-21.4	1	0.01638935	0.529	0.0	0.0	-7.8187385798577775	15	18	8	3UTR	MIRT132403	0	1
hsa-miR-106b-5p	NM_002613	PDPK1	TAAAGTGCTGACAGTGCAGAT#CACTGTGAGCATTTTGC#(((((((((.((((((.....#)))))).))))))))).	4812	4829	1.0	-20.1	1	0.001144348	0.471	0.0	0.0	-5.180080914529843	15	17	9	3UTR	MIRT506283	0	0
hsa-miR-106b-5p	NM_002734	PRKAR1A	TAAAGTGCTGACAGTGCAGAT#TCTGTAATGTAGGCACTTTT#.((((((((.(((.((((((.#)))))).))).)))))))).	2667	2687	1.0	-20.3	1	0.01641083	0.765	0.0	0.0	-5.892671223205703	17	20	8	3UTR	MIRT535035	0	0
hsa-miR-106b-5p	NM_002745	MAPK1	TAAAGTGCTGACAGTGCAGAT#GCACTGGCCCAGCACTTG#..((((((((.((((((....#))))))...)))))))).	3063	3081	1.0	-22.7	1	0.0006761619	0.485	0.0	0.0	-7.7817751947826395	14	18	8	3UTR	MIRT440279	1	1
hsa-miR-106b-5p	NM_002745	MAPK1	TAAAGTGCTGACAGTGCAGAT#TCTGCTTTCTTCCTCTGCTTCAGACTGTCAGCT#......((((((((((((((.#.))))).....))))))))).	5732	5765	1.0	-21.5	0	0.000564138	0.544	0.0	0.0	-15.566558404643448	14	21	9	3UTR	MIRT440279	1	1
hsa-miR-106b-5p	NM_002752	MAPK9	TAAAGTGCTGACAGTGCAGAT#CTGTCAGCATTG#...(((((((((((.......#))))))))))).	1577	1589	1.0	-17.6	0	0.0001129558	0.529	2.6229686363636366	2.02340743125	-7.483038834232987	11	12	11	3UTR	MIRT005864	0	1
hsa-miR-106b-5p	NM_002830	PTPN4	TAAAGTGCTGACAGTGCAGAT#CTTTGAAAACTTCAGCACTGTTGCACTTTAT#((((((((.((((((((.((.#.)).)))))))))))))))).	3379	3410	1.0	-23.7	1	0.02869066	0.721	0.0	0.0	-4.993964104447428	18	21	16	3UTR	MIRT439864	1	1
hsa-miR-106b-5p	NM_002830	PTPN4	TAAAGTGCTGACAGTGCAGAT#ATCTGATTTGTGTCAGCACC#....(((((((((...(((((#))))).....))))))))).	6128	6148	1.0	-20.3	0	0.001604905	0.647	0.0	0.0	-11.371901026712584	14	20	9	3UTR	MIRT439864	1	1
hsa-miR-106b-5p	NM_002868	RAB5B	TAAAGTGCTGACAGTGCAGAT#ATCTCCACTGTTAGCT#......((((((((((.((((#)))).)))))))))).	1928	1944	1.0	-19.5	0	0.05354	0.588	0.14666949	-0.02042759749999999	-15.566558404643448	14	16	10	3UTR	MIRT065889	1	1
hsa-miR-106b-5p	NM_003107	SOX4	TAAAGTGCTGACAGTGCAGAT#GTCTGCACCCCCAGCAA#.....(((((...((((((((#))))))))...))))).	2598	2615	1.0	-19.1	0	0.0004166945	0.485	0.0	0.0	-21.126308041123355	13	17	8	3UTR	MIRT099829	1	1
hsa-miR-106b-5p	NM_003110	SP2	TAAAGTGCTGACAGTGCAGAT#TCTGCAACTGTCCCCACA#....(((..(((((((((((.#)))))).)))))..))).	2008	2026	1.0	-19.9	0	0.010622	0.412	1.643213075	2.63305343625	-12.916587056064323	14	18	6	3UTR	MIRT783077	0	0
hsa-miR-106b-5p	NM_003121	SPIB	TAAAGTGCTGACAGTGCAGAT#GTCGCTGGTGGTGGTCTCTTTAGTGCACTGTAGCACTTG#..(((((((.((((((((...#.))))))))))))))).	1820	1859	1.0	-23.3	1	0.0001143445	0.471	0.0	0.0	-6.199507187700468	15	17	15	3UTR	MIRT615182	0	0
hsa-miR-106b-5p	NM_003242	TGFBR2	TAAAGTGCTGACAGTGCAGAT#TTTGTTTGGTCAGCACA#....((((((((...(((((.#)))))...)))))))).	3151	3168	1.0	-19.2	0	0.002367763	0.618	-0.345654625	-0.2999239950000001	-12.427982559075213	13	17	8	3UTR	MIRT091689	1	1
hsa-miR-106b-5p	NM_003298	NR2C2	TAAAGTGCTGACAGTGCAGAT#TGCAAGGTGGGCATTTTGA#(((((((((.((..((((...#))))..)).))))))))).	3147	3166	1.0	-18.9	1	0.000269415	0.544	0.0	0.0	-7.326051444716493	15	19	9	3UTR	MIRT440095	1	1
hsa-miR-106b-5p	NM_003376	VEGFA	TAAAGTGCTGACAGTGCAGAT#TCTGCGCAGAGCACTTTGG#(((((((((....(((((((.#)))))))..))))))))).	1850	1869	1.0	-22.0	1	0.00375543	0.397	0.0	0.0	-12.640789312202793	16	19	9	3UTR	MIRT004466	1	1
hsa-miR-106b-5p	NM_003390	WEE1	TAAAGTGCTGACAGTGCAGAT#ATCCCACTGGGAGCACTTTGT#(((((((((..(((((..(((#))).)))))..))))))))).	2672	2693	1.0	-20.0	1	0.0006998869	0.574	0.0	0.0	-8.004855389940193	17	21	9	3UTR	MIRT005868	1	1
hsa-miR-106b-5p	NM_003463	PTP4A1	TAAAGTGCTGACAGTGCAGAT#ATTTGGATACTTGGCAAAAGATTCTTGCTGTCAGCATA#....((((((((((((.(((.#.))))))))))))))).	1390	1428	1.0	-20.8	0	0.0001302808	0.676	0.0	0.0	-9.546562468637928	15	17	15	3UTR	MIRT485195	0	0
hsa-miR-106b-5p	NM_003463	PTP4A1	TAAAGTGCTGACAGTGCAGAT#TGTCAGCATTTTAG#(((((((((((((........#))))))))))))).	2599	2613	1.0	-18.0	1	0.03712889	0.735	0.0	0.0	-5.762913004276319	13	14	13	3UTR	MIRT485195	0	0
hsa-miR-106b-5p	NM_003583	DYRK2	TAAAGTGCTGACAGTGCAGAT#GCACTGTAGGGCTTTT#.(((((.((.(((((((....#))))))))).))))).	4418	4434	1.0	-19.1	0	0.002501115	0.676	0.0	0.0	-6.5795178405566155	14	16	9	3UTR	MIRT188187	1	0
hsa-miR-106b-5p	NM_003754	EIF3F	TAAAGTGCTGACAGTGCAGAT#GTCTGTATTGTTATCAGCAA#.....((((((((((((((((#))))))))))...)))))).	3860	3880	1.0	-19.7	0	0.004238516	0.647	0.0	0.0	-13.6655996434504	16	20	10	3UTR	MIRT044355	0	0
hsa-miR-106b-5p	NM_003884	KAT2B	TAAAGTGCTGACAGTGCAGAT#GCTGTCAGTATTTTAA#(((((((((((((((......#))))))))))))))).	3546	3562	1.0	-20.5	1	0.08556394	0.588	0.0	0.0	-4.1706235265052785	15	16	15	3UTR	MIRT004333	1	1
hsa-miR-106b-5p	NM_003900	SQSTM1	TAAAGTGCTGACAGTGCAGAT#GCATCAGCACTTTAA#(((((((((((...(((....#)))))))))))))).	1997	2012	1.0	-18.7	1	0.004499939	0.691	4.3910718181818185	5.3107507375	-9.430348285984671	14	15	14	3UTR	MIRT096312	1	1
hsa-miR-106b-5p	NM_003941	WASL	TAAAGTGCTGACAGTGCAGAT#GTCCTCTACCATCCTGCACTGTGAGCAGCACTA#...((((((((((((((((..#.)))))))))...))))))).	4031	4064	1.0	-26.5	0	7.107681e-05	0.485	0.09929124210526313	-0.024117436249999992	-6.514540193678739	16	21	9	3UTR	MIRT552900	0	0
hsa-miR-106b-5p	NM_004302	ACVR1B	TAAAGTGCTGACAGTGCAGAT#TCTTGCACTGTCCAGCT#......((((((((((((((.#))).)))))))).))).	3319	3336	1.0	-20.3	0	0.01932171	0.515	0.0	0.0	-15.566558404643448	14	17	8	3UTR	MIRT065674	1	0
hsa-miR-106b-5p	NM_004349	RUNX1T1	TAAAGTGCTGACAGTGCAGAT#GTCTAGGCATCATGCTTTTGTCAGCATA#....((((((((((.((((((#.))).)))..)))))))))).	5369	5397	1.0	-19.7	0	0.001387745	0.529	0.0	0.0	-10.282012028888563	16	21	10	3UTR	MIRT020443	0	0
hsa-miR-106b-5p	NM_004396	DDX5	TAAAGTGCTGACAGTGCAGAT#GCTTTGTCAGCT#......((((((((.((....#)).)))))))).	2561	2573	1.0	-16.0	0	0.0008444817	0.603	0.0	0.0	-16.30200796489408	10	12	8	3UTR	MIRT440832	1	1
hsa-miR-106b-5p	NM_004418	DUSP2	TAAAGTGCTGACAGTGCAGAT#GTCTGTCTGTGAGCCTTTC#.((((.(((.((((.((((((#)))))))))).))))))).	1502	1521	1.0	-19.6	0	0.00243937	0.5	2.9558223333333333	2.4575233375000005	-7.672239627128978	17	19	10	3UTR	MIRT494079	1	1
hsa-miR-106b-5p	NM_004530	MMP2	TAAAGTGCTGACAGTGCAGAT#GTTTGCTTTGTATGCACTTTGT#((((((((..((((.((((((#)))))).))))..)))))))).	2766	2788	1.0	-20.5	1	0.0588242	0.691	0.6699509999999999	1.1270799525	-6.971920133026242	18	22	8	3UTR	MIRT438153	1	1
hsa-miR-106b-5p	NM_004755	RPS6KA5	TAAAGTGCTGACAGTGCAGAT#TCTGGCTGGGCACTGTGGCTCACGCCTGTAATCCCAGCACTTTGC#(((((((((((((((((....#.)))))))..................)))))))))).	13494	13539	1.0	-22.2	1	0.0004683429	0.397	0.0	0.0	-3.937574446201665	17	37	10	3UTR	MIRT534571	1	1
hsa-miR-106b-5p	NM_004755	RPS6KA5	TAAAGTGCTGACAGTGCAGAT#TCATGCCTGTAATCCCAGCACTTTGG#((((((((((((((.(((((.#)).))))))).....)))))))))).	21675	21701	1.0	-20.7	1	0.0002270312	0.368	0.0	0.0	-4.6730240064523	19	26	10	3UTR	MIRT534571	1	1
hsa-miR-106b-5p	NM_203390	RBM12B	TAAAGTGCTGACAGTGCAGAT#ATTTATTAGGCACTTACTATGTGCTAGGCACTGTAAGCACTTTAC#(((((((((.(((((((....#.))))))).))))))))).	4331	4376	1.0	-24.5	1	0.0009834951	0.574	0.9723963333333333	0.29062003125	-5.180080914529843	16	19	9	3UTR	MIRT044375	0	1
hsa-miR-106b-5p	NM_205768	ZBTB18	TAAAGTGCTGACAGTGCAGAT#CTGCATTGTCTTTTGAGCTCTTTT#.((((.(((((((((((((..#)))))))))).....))).)))).	2051	2075	1.0	-20.4	0	0.2402263	0.676	1.8646172388888889	0.5210575775000001	-5.694283598550164	17	24	10	3UTR	MIRT064801	1	1
hsa-miR-106b-5p	NM_206853	QKI	TAAAGTGCTGACAGTGCAGAT#GTCACTGTTTTTATTTAAAATGCAGTGTCAGCAA#.....((((((((.((((...#.)))).)))))))).	3918	3952	1.0	-21.2	0	0.005836184	0.662	0.80899975	1.5677177549499999	-14.522439560970808	12	15	8	3UTR	MIRT099315	1	0
hsa-miR-106b-5p	NM_207123	GAB1	TAAAGTGCTGACAGTGCAGAT#ATCTCCAGTACTTTATAAAATCCCAACAATTGCTGTAAGTCAGCACTTTGG#((((((((((((..(((((..#.))))).)))))))))))).	7049	7100	1.0	-23.6	1	0.0003655233	0.529	0.09249372500000001	-0.010895032499999985	-6.083544976388314	17	20	12	3UTR	MIRT164203	1	1
hsa-miR-106b-5p	NM_207123	GAB1	TAAAGTGCTGACAGTGCAGAT#TACTGTGAGCATTTTAG#(((((((((.((((((.....#)))))).))))))))).	5520	5537	1.0	-19.2	1	0.01637477	0.706	1.159986111111111	0.514523375	-5.180080914529843	15	17	9	3UTR	MIRT164203	1	1
hsa-miR-106b-5p	NM_212471	PRKAR1A	TAAAGTGCTGACAGTGCAGAT#TCTGTAATGTAGGCACTTTT#.((((((((.(((.((((((.#)))))).))).)))))))).	2691	2711	1.0	-20.3	1	0.01641083	0.765	0.0	0.0	-5.892671223205703	17	20	8	3UTR	MIRT535035	0	0
hsa-miR-106b-5p	NM_212472	PRKAR1A	TAAAGTGCTGACAGTGCAGAT#TCTGTAATGTAGGCACTTTT#.((((((((.(((.((((((.#)))))).))).)))))))).	2749	2769	1.0	-20.3	1	0.01641083	0.765	1.742221125	1.5113934750000002	-5.892671223205703	17	20	8	3UTR	MIRT535035	0	0
hsa-miR-106b-5p	XM_005245711	HNRNPR	TAAAGTGCTGACAGTGCAGAT#TTGCACTGCGGACTTTAG#((((((.(((.((((((((..#))))))))))))))))).	3113	3131	1.0	-20.2	0	0.0001445782	0.603	0.0	0.0	-8.306035456483334	17	18	17	3UTR	MIRT506993	0	0
hsa-miR-106b-5p	XM_005249515	DNAJB6	TAAAGTGCTGACAGTGCAGAT#GTCTGTGCTGTGTCACTG#...((((...(((((((((((#)))))))))))..)))).	2142	2160	1.0	-18.9	0	0.004357251	0.426	0.0	0.0	-11.127071249433312	15	18	11	3UTR	MIRT020424	1	0
hsa-miR-106b-5p	XM_005254675	PEAK1	TAAAGTGCTGACAGTGCAGAT#GTCAGAACTGTCAGCATTTG#..(((((((((((((...(((#)))...))))))))))))).	6626	6646	1.0	-21.7	1	0.002150501	0.544	0.0	0.0	-5.1900497996759025	16	20	13	3UTR	MIRT439649	1	0
hsa-miR-106b-5p	XM_005255048	RNPS1	TAAAGTGCTGACAGTGCAGAT#TTGTACAGTCAGTACTA#...(((((((((.((((((..#)))))).))))))))).	2299	2316	1.0	-20.8	0	0.002653353	0.765	0.0	0.0	-7.803670806344982	15	17	9	3UTR	MIRT044270	0	0
hsa-miR-106b-5p	XM_005258059	SSH2	TAAAGTGCTGACAGTGCAGAT#ACTGTCAGCATG#....(((((((((((......#))))))))))).	6311	6323	1.0	-18.2	0	0.003611456	0.5	0.0	0.0	-9.779611548941542	11	12	11	3UTR	MIRT439539	0	1
hsa-miR-106b-5p	XM_005262109	ACSL4	TAAAGTGCTGACAGTGCAGAT#GTGCTGCAGGGCTTTAA#((((((.(((.((((((....#))))))))).)))))).	2877	2894	1.0	-19.7	0	0.001324046	0.632	0.0	0.0	-8.306035456483334	15	17	9	3UTR	MIRT175384	1	1
hsa-miR-106b-5p	XM_005266338	SACS	TAAAGTGCTGACAGTGCAGAT#TGCACTGAGTGCACTTTAC#((((((((...(((((((...#)))))))...)))))))).	14948	14967	1.0	-21.7	1	0.008256993	0.721	0.0	0.0	-9.06124504818596	15	19	8	3UTR	MIRT439717	1	1
hsa-miR-106b-5p	XM_005273659	GINS4	TAAAGTGCTGACAGTGCAGAT#CTGTACATGTCCAACTGCACGGAGCACTTTAC#(((((((((....((((((..#.))))))..))))))))).	3626	3658	1.0	-22.0	1	1.861429e-05	0.529	0.0	0.0	-12.640789312202793	15	19	9	3UTR	MIRT124131	0	1
hsa-miR-106b-5p	XM_006717720	INPP5F	TAAAGTGCTGACAGTGCAGAT#CTGCCTGTTACGTGCC#....((((((((((.((((..#)))))))))).)))).	3221	3237	1.0	-16.8	0	0.01989626	0.544	0.0	0.0	-10.282012028888563	14	16	10	3UTR	MIRT440453	0	0
hsa-miR-106b-5p	XM_006724635	ACSL4	TAAAGTGCTGACAGTGCAGAT#GTGCTGCAGGGCTTTAA#((((((.(((.((((((....#))))))))).)))))).	2586	2603	1.0	-19.7	0	0.001324046	0.632	0.0	0.0	-8.306035456483334	15	17	9	3UTR	MIRT175384	1	1
hsa-miR-106b-5p	XM_011512194	CD28	TAAAGTGCTGACAGTGCAGAT#ATTTGCACTGCCAGCT#......((((.((((((((((#)))))))))).)))).	4142	4158	1.0	-20.7	0	0.0008700646	0.5	0.0	0.0	-18.3913328800538	14	16	10	3UTR	MIRT684937	0	0
hsa-miR-106b-5p	XM_011515704	DNAJB6	TAAAGTGCTGACAGTGCAGAT#GTCTGTGCTGTGTCACTG#...((((...(((((((((((#)))))))))))..)))).	2076	2094	1.0	-18.9	0	0.004357251	0.426	0.0	0.0	-11.127071249433312	15	18	11	3UTR	MIRT020424	1	0
hsa-miR-106b-5p	XM_011517029	RBM12B	TAAAGTGCTGACAGTGCAGAT#ATTTATTAGGCACTTACTATGTGCTAGGCACTGTAAGCACTTTAC#(((((((((.(((((((....#.))))))).))))))))).	4282	4327	1.0	-24.5	1	0.0009834951	0.574	0.0	0.0	-5.180080914529843	16	19	9	3UTR	MIRT044375	0	1
hsa-miR-106b-5p	XM_011519252	SEC16A	TAAAGTGCTGACAGTGCAGAT#CTGCACTTTCCGTGAGCACTTTT#.((((((((.(((((((((..#)))))))....)).)))))))).	8148	8171	1.0	-23.5	1	0.03491203	0.529	0.0	0.0	-5.035831305685297	17	23	8	3UTR	MIRT439693	0	0
hsa-miR-106b-5p	XM_011519257	SEC16A	TAAAGTGCTGACAGTGCAGAT#CTGCACTTTCCGTGAGCACTTTT#.((((((((.(((((((((..#)))))))....)).)))))))).	8073	8096	1.0	-23.5	1	0.03491203	0.529	0.0	0.0	-5.035831305685297	17	23	8	3UTR	MIRT439693	0	0
hsa-miR-106b-5p	XM_011519259	SEC16A	TAAAGTGCTGACAGTGCAGAT#CTGCACTTTCCGTGAGCACTTTT#.((((((((.(((((((((..#)))))))....)).)))))))).	8013	8036	1.0	-23.5	1	0.03491203	0.529	0.0	0.0	-5.035831305685297	17	23	8	3UTR	MIRT439693	0	0
hsa-miR-106b-5p	XM_011519263	SEC16A	TAAAGTGCTGACAGTGCAGAT#CTGCACTTTCCGTGAGCACTTTT#.((((((((.(((((((((..#)))))))....)).)))))))).	7377	7400	1.0	-23.5	1	0.03491203	0.529	0.0	0.0	-5.035831305685297	17	23	8	3UTR	MIRT439693	0	0
hsa-miR-106b-5p	XM_011523253	RBL2	TAAAGTGCTGACAGTGCAGAT#GTGTGCAATGTCTGAGTGAACCTGTATAAGTGGAGGCACTTTAG#(((((((((..((((((((..#.))))))...))..))))))))).	3600	3644	1.0	-20.9	1	2.355603e-05	0.588	0.0	0.0	-8.004855389940193	17	24	9	3UTR	MIRT005867	1	1
hsa-miR-106b-5p	XM_011524984	PRKAR1A	TAAAGTGCTGACAGTGCAGAT#TCTGTAATGTAGGCACTTTT#.((((((((.(((.((((((.#)))))).))).)))))))).	2768	2788	1.0	-20.3	1	0.01641083	0.765	0.0	0.0	-5.892671223205703	17	20	8	3UTR	MIRT535035	0	0
hsa-miR-106b-5p	XM_011530888	ACSL4	TAAAGTGCTGACAGTGCAGAT#GTGCTGCAGGGCTTTAA#((((((.(((.((((((....#))))))))).)))))).	2816	2833	1.0	-19.7	0	0.001324046	0.632	0.0	0.0	-8.306035456483334	15	17	9	3UTR	MIRT175384	1	1
hsa-miR-106b-5p	XM_011537789	CIT	TAAAGTGCTGACAGTGCAGAT#CTGCAGTCTGTAGCACTG#...((((((.(((((((((..#)))))..)))))))))).	6592	6610	1.0	-19.8	0	0.0005585028	0.529	0.0	0.0	-7.757046662006918	15	18	10	3UTR	MIRT440942	1	1
hsa-miR-106b-5p	XM_011541538	SH3GLB1	TAAAGTGCTGACAGTGCAGAT#CTGTACTGTGGTACA#....(((((.(((((((((..#)))))))))))))).	2241	2256	1.0	-19.8	0	3.092151e-05	0.632	0.0	0.0	-10.789068936966107	14	15	14	3UTR	MIRT199285	0	1
hsa-miR-106b-5p	XM_017008693	QRFPR	TAAAGTGCTGACAGTGCAGAT#GCAGCTTTCAGTACTTTT#.((((((((((.(((((....#))).)).)))))))))).	2031	2049	1.0	-17.9	1	0.0002059798	0.632	0.0	0.0	-7.140128146953473	15	18	10	3UTR	MIRT683995	0	0
hsa-miR-106b-5p	XM_017010650	FYN	TAAAGTGCTGACAGTGCAGAT#ATTTACAAGTTCTGTTAGCACTA#...(((((((((((.((....#.)).))))))))))).	2790	2813	1.0	-20.3	0	0.001130615	0.574	0.0	0.0	-7.249989753929374	13	16	11	3UTR	MIRT732298	1	0
hsa-miR-106b-5p	XM_017013408	RBM12B	TAAAGTGCTGACAGTGCAGAT#ATTTATTAGGCACTTACTATGTGCTAGGCACTGTAAGCACTTTAC#(((((((((.(((((((....#.))))))).))))))))).	4349	4394	1.0	-24.5	1	0.0009834951	0.574	0.0	0.0	-5.180080914529843	16	19	9	3UTR	MIRT044375	0	1
hsa-miR-106b-5p	NM_001080392	DENND11	TAAAGTGCTGACAGTGCAGAT#CTGCCTGAGCAGGCCTAGTTCTCCTGTGAAGCTGTCAGCCTG#...((.(((((((((((((..#.))))...))))))))))).	4304	4346	1.0	-21.0	0	0.005556796	0.5	-0.30215592500000005	0.12325333374999993	-8.415498954871785	15	20	11	3UTR	MIRT506872	1	1
hsa-miR-106b-5p	NM_001083588	E2F5	TAAAGTGCTGACAGTGCAGAT#TTTGTGAAGTGCCTTCTGTTTTAGCACTTTAA#((((((((((((((.(((...#.)))...)))))..))))))))).	1789	1821	1.0	-18.6	1	0.009095239	0.676	3.867121875	2.43165329375	-4.6730240064523	17	24	9	3UTR	MIRT053530	1	1
hsa-miR-106b-5p	NM_001083589	E2F5	TAAAGTGCTGACAGTGCAGAT#TTTGTGAAGTGCCTTCTGTTTTAGCACTTTAA#((((((((((((((.(((...#.)))...)))))..))))))))).	1423	1455	1.0	-18.6	1	0.009095239	0.676	3.867121875	2.43165329375	-4.6730240064523	17	24	9	3UTR	MIRT053530	1	1
hsa-miR-106b-5p	NM_001085377	MCC	TAAAGTGCTGACAGTGCAGAT#GTTTGCATTTGTCAGTATTG#...((((((((((((((((((#))))))))).))))))))).	8025	8045	1.0	-21.5	0	0.0002365839	0.676	3.9030231578947356	3.3782807749999995	-6.514540193678739	18	20	9	3UTR	MIRT556190	1	1
hsa-miR-106b-5p	NM_001099694	ZNF578	TAAAGTGCTGACAGTGCAGAT#GTCTCGCTCTGTCAGCT#......((((((((.((((((#)))).)).)))))))).	4574	4591	1.0	-20.7	0	0.0008750486	0.515	-0.051534250000000004	-0.11453027249999999	-16.30200796489408	14	17	8	3UTR	MIRT691002	0	0
hsa-miR-106b-5p	NM_001102398	HNRNPR	TAAAGTGCTGACAGTGCAGAT#TTGCACTGCGGACTTTAG#((((((.(((.((((((((..#))))))))))))))))).	3119	3137	1.0	-20.2	0	0.0001445782	0.603	0.0	0.0	-8.306035456483334	17	18	17	3UTR	MIRT506993	0	0
hsa-miR-106b-5p	NM_001102399	HNRNPR	TAAAGTGCTGACAGTGCAGAT#TTGCACTGCGGACTTTAG#((((((.(((.((((((((..#))))))))))))))))).	2953	2971	1.0	-20.2	0	0.0001445782	0.603	0.0	0.0	-8.306035456483334	17	18	17	3UTR	MIRT506993	0	0
hsa-miR-106b-5p	NM_001110792	MECP2	TAAAGTGCTGACAGTGCAGAT#CTGTGCTGTTAGCATTC#...((((((((((((((((..#)))))))))))))))).	10301	10318	1.0	-24.4	0	5.113663e-05	0.609	2.21511125	2.8356689022058825	-6.514540193678739	16	17	16	3UTR	MIRT440262	1	1
hsa-miR-106b-5p	NM_001111	ADAR	TAAAGTGCTGACAGTGCAGAT#TGTGCATTCTTTGAATAGTCACTCGTAAAAACTGTCAGTGCTTG#..(((((((((((((......#.))))))))))))).	5253	5297	1.0	-20.0	1	0.007690984	0.632	-0.21151897692307686	-0.34853787249999996	-5.1900497996759025	13	15	13	3UTR	MIRT482480	1	0
hsa-miR-106b-5p	NM_001122770	ZBTB37	TAAAGTGCTGACAGTGCAGAT#CTGTCAGCACTG#...(((((((((((.......#))))))))))).	16708	16720	1.0	-19.9	0	0.005981895	0.559	0.0	0.0	-7.483038834232987	11	12	11	3UTR	MIRT182521	1	0
hsa-miR-106b-5p	NM_001123355	PPP6C	TAAAGTGCTGACAGTGCAGAT#CTGACAAGAAGTTAGCATTTTAT#((((((((((((..(((((..#))).))....)))))))))))).	4161	4184	1.0	-17.1	1	0.002614252	0.706	0.5257634999999999	1.8973744837500002	-6.083544976388314	17	23	12	3UTR	MIRT439906	1	1
hsa-miR-106b-5p	NM_001123369	PPP6C	TAAAGTGCTGACAGTGCAGAT#CTGACAAGAAGTTAGCATTTTAT#((((((((((((..(((((..#))).))....)))))))))))).	3984	4007	1.0	-17.1	1	0.002614252	0.706	0.5257634999999999	1.8973744837500002	-6.083544976388314	17	23	12	3UTR	MIRT439906	1	1
hsa-miR-106b-5p	NM_001127510	APC	TAAAGTGCTGACAGTGCAGAT#GTATAATCAGCACTTTGC#(((((((((((..((((....#))))..))))))))))).	10091	10109	1.0	-19.5	1	0.001870437	0.588	0.5297784000000001	0.075443895	-8.573508368464264	15	18	11	3UTR	MIRT007071	0	0
hsa-miR-106b-5p	NM_001127891	MMP2	TAAAGTGCTGACAGTGCAGAT#GTTTGCTTTGTATGCACTTTGT#((((((((..((((.((((((#)))))).))))..)))))))).	2653	2675	1.0	-20.5	1	0.0588242	0.691	2.136039625	0.4416339262500001	-6.971920133026242	18	22	8	3UTR	MIRT438153	1	1
hsa-miR-106b-5p	NM_001128159	VPS53	TAAAGTGCTGACAGTGCAGAT#TCATGCCTGTAATCACAGCACTTTGG#((((((((((((((.(((((.#)).))))))).....)))))))))).	3952	3978	1.0	-20.7	1	0.01258608	0.426	0.0	0.0	-4.6730240064523	19	26	10	3UTR	MIRT686339	0	1
hsa-miR-106b-5p	NM_001128164	ATXN1	TAAAGTGCTGACAGTGCAGAT#GTTTGACATTTTCAGCACTTC#..(((((((((.(((((((((#))))).)))).))))))))).	8871	8892	1.0	-20.1	1	0.07507923	0.676	2.53467041	2.619035481249999	-8.303804028968646	18	21	9	3UTR	MIRT441140	1	1
hsa-miR-106b-5p	NM_001128164	ATXN1	TAAAGTGCTGACAGTGCAGAT#GTCCTGTCAGTATTTG#..((((((((((((.((....#)).)))))))))))).	9912	9928	1.0	-18.9	1	0.001082048	0.574	0.059626825000000015	0.9818564049999997	-5.692450279622925	14	16	12	3UTR	MIRT441140	1	1
hsa-miR-106b-5p	NM_001130523	CSDE1	TAAAGTGCTGACAGTGCAGAT#TCTGCCTTAGCACTC#...(((((((..((.(((((.#)))))))))))))).	3301	3316	1.0	-16.9	0	0.001404031	0.618	6.578040571428572	5.4259152625	-13.42156753893608	14	15	14	3UTR	MIRT544634	0	1
hsa-miR-106b-5p	NM_001135733	TP53INP1	TAAAGTGCTGACAGTGCAGAT#CTGCCCGCGTCAGTACA#....((((((((.(.((((..#)))).)..)))))))).	1111	1128	1.0	-18.9	0	0.02985395	0.559	0.42699947	0.8173406879999999	-11.571142641554806	13	17	8	3UTR	MIRT448392	1	1
hsa-miR-106b-5p	NM_001135768	PVR	TAAAGTGCTGACAGTGCAGAT#ATGTGTACTGTCACCACG#....(((.((((((((((.((#)).)))))))))).))).	3130	3148	1.0	-20.4	0	0.001072897	0.485	-0.45804287000000005	0.05723948749999999	-11.86019739781856	15	18	10	3UTR	MIRT293649	0	0
hsa-miR-106b-5p	NM_001135769	PVR	TAAAGTGCTGACAGTGCAGAT#ATGTGTACTGTCACCACG#....(((.((((((((((.((#)).)))))))))).))).	3106	3124	1.0	-20.4	0	0.001072897	0.485	-0.45804287000000005	0.05723948749999999	-11.86019739781856	15	18	10	3UTR	MIRT293649	0	0
hsa-miR-106b-5p	NM_001142281	ARCN1	TAAAGTGCTGACAGTGCAGAT#TCTGCACTTTTAGCT#......(((((.((((((((.#)))))))).))))).	3146	3161	1.0	-19.5	0	0.005487399	0.529	0.28681867499999997	0.011795485000000008	-18.9133617142398	13	15	8	3UTR	MIRT129139	0	0
hsa-miR-106b-5p	NM_031944	MIXL1	TAAAGTGCTGACAGTGCAGAT#TGCAGTGGCTCACTCCTGCAATCTCAGCACTTTGG#(((((((((((...(((((..#.)))))...))))))))))).	1309	1344	1.0	-24.0	1	0.0002382547	0.412	-0.2467683636363636	-0.0076830812499999734	-9.430348285984671	16	21	11	3UTR	MIRT516561	0	0
hsa-miR-106b-5p	NM_031944	MIXL1	TAAAGTGCTGACAGTGCAGAT#CTGCACTTCAGCCTG#...((.(((((.(((((((..#)))))))))))))).	1544	1559	1.0	-20.3	0	0.0001037634	0.515	0.301768	-0.01494096125000003	-11.76230226446814	14	15	14	3UTR	MIRT516561	0	0
hsa-miR-106b-5p	NM_032103	PPP1R12B	TAAAGTGCTGACAGTGCAGAT#CTGCATTGAGGCGCTC#...((((((..((((((((..#)))))))).)))))).	2009	2025	1.0	-21.3	0	0.0007301868	0.515	0.062267874999999986	0.194229795	-10.581821137417268	14	16	8	3UTR	MIRT132403	0	1
hsa-miR-106b-5p	NM_032104	PPP1R12B	TAAAGTGCTGACAGTGCAGAT#CTGCATTGAGGCGCTC#...((((((..((((((((..#)))))))).)))))).	2190	2206	1.0	-21.3	0	0.0007301868	0.515	0.062267874999999986	0.194229795	-10.581821137417268	14	16	8	3UTR	MIRT132403	0	1
hsa-miR-106b-5p	NM_032341	DDI2	TAAAGTGCTGACAGTGCAGAT#TTTGCCTGTTAGCATG#....((((((((((.(((((.#))))))))))))))).	8411	8427	1.0	-20.6	0	0.005678277	0.721	-0.08432250999999998	0.06419195750000001	-10.282012028888563	15	16	15	3UTR	MIRT688524	0	0
hsa-miR-106b-5p	NM_032486	DCTN5	TAAAGTGCTGACAGTGCAGAT#CTGCTACTGTCTGCCTTG#..(((.((.((((((((((..#)))).)))))).))))).	7605	7623	1.0	-20.0	0	0.0003358153	0.485	-0.1281314636363637	-0.03047011074999999	-7.914349138811099	15	18	6	3UTR	MIRT685213	0	0
hsa-miR-106b-5p	NM_032511	FAXC	TAAAGTGCTGACAGTGCAGAT#TGCAATGATGAACTATATTGTCAGCATTTA#..((((((((((((((.((..#.)).)))))))))))))).	4481	4511	1.0	-20.0	1	0.006990794	0.735	0.14587882857142856	0.09210283874999997	-4.95700071937229	16	19	14	3UTR	MIRT615453	0	1
hsa-miR-106b-5p	NM_032522	ZBTB37	TAAAGTGCTGACAGTGCAGAT#CTGTCAGCACTG#...(((((((((((.......#))))))))))).	28777	28789	1.0	-19.9	0	0.005981895	0.559	0.02403858181818177	0.37718680250000003	-7.483038834232987	11	12	11	3UTR	MIRT182521	1	0
hsa-miR-106b-5p	NM_032815	NFATC2IP	TAAAGTGCTGACAGTGCAGAT#GTCTGTAATCCCAGCACTTTC#.(((((((((....(((((((#)))))))....))))))))).	3264	3285	1.0	-20.5	1	0.01248929	0.397	0.3121234444444444	-0.01679376250000003	-12.110873152550473	16	21	9	3UTR	MIRT250448	0	1
hsa-miR-106b-5p	NM_032828	ZNF587	TAAAGTGCTGACAGTGCAGAT#ATCTGCCTGCCTCAGCT#......((((((((.((((((#)))))))))..))))).	2865	2882	1.0	-18.1	0	0.0004754697	0.485	-0.3718411000000001	-0.006861774999999952	-16.30200796489408	14	17	9	3UTR	MIRT044316	0	0
hsa-miR-106b-5p	NM_033549	TRIM41	TAAAGTGCTGACAGTGCAGAT#CTCTGTCAGCACTTG#..((((((((((((.(.....#).)))))))))))).	2636	2651	1.0	-20.7	1	0.005457636	0.324	0.8838766499999999	0.7663435499999998	-5.692450279622925	13	15	12	3UTR	MIRT735841	0	0
hsa-miR-106b-5p	NM_033624	FBXO21	TAAAGTGCTGACAGTGCAGAT#CTGTCTGTCTGCATTTG#..((((((.(((((.((((..#))))))))).)))))).	2242	2259	1.0	-18.8	1	0.009248508	0.559	-0.7774827000000001	0.23125481125000003	-6.748839937868687	15	17	9	3UTR	MIRT440658	1	1
hsa-miR-106b-5p	NM_033668	ITGB1	TAAAGTGCTGACAGTGCAGAT#ATTTGCCTGTTAGACATG#....((((((((((.((((((#))))))))))))).))).	2949	2967	1.0	-17.3	0	0.02412312	0.691	6.973007454545454	5.022216408749999	-10.282012028888563	16	18	13	3UTR	MIRT567119	0	0
hsa-miR-106b-5p	NM_130439	MXI1	TAAAGTGCTGACAGTGCAGAT#CTGCATTGTTAGCACTA#...((((((((((((((((..#)))))))))))))))).	1761	1778	1.0	-27.7	0	0.01571085	0.471	1.8237409375000002	1.8107792749999996	-6.514540193678739	16	17	16	3UTR	MIRT020453	1	1
hsa-miR-106b-5p	NM_133376	ITGB1	TAAAGTGCTGACAGTGCAGAT#ATTTGCCTGTTAGACATG#....((((((((((.((((((#))))))))))))).))).	3071	3089	1.0	-17.3	0	0.02412312	0.691	5.653957	4.6676807075	-10.282012028888563	16	18	13	3UTR	MIRT567119	0	0
hsa-miR-106b-5p	NM_133496	SLC30A7	TAAAGTGCTGACAGTGCAGAT#ATCTGGAATTTGTCAGCATTC#...(((((((((((..(((((#)))))....))))))))))).	4658	4679	1.0	-20.0	0	0.001721949	0.618	0.022539045454545447	0.08951181375	-7.483038834232987	16	21	11	3UTR	MIRT057826	1	1
hsa-miR-106b-5p	NM_134265	WSB1	TAAAGTGCTGACAGTGCAGAT#CTGCACTGTAGCATG#....(((((.(((((((((..#)))))))))))))).	4261	4276	1.0	-21.8	0	0.0008360841	0.471	-0.6287498666666667	0.29823515375000004	-10.789068936966107	14	15	14	3UTR	MIRT520158	0	0
hsa-miR-106b-5p	NM_138468	ICA1L	TAAAGTGCTGACAGTGCAGAT#ATTTGCAGCTGTTGGTACTA#...((((((((((((((((((#))))))).))))))))))).	1917	1937	1.0	-22.2	0	0.00231584	0.647	0.019948926315789473	0.12561317750000003	-6.514540193678739	18	20	11	3UTR	MIRT662413	0	0
hsa-miR-106b-5p	NM_138621	BCL2L11	TAAAGTGCTGACAGTGCAGAT#TCTGGTTGCAGGCTTTCCCATGGTCACAGGATGCACTGTCAGCATC#....((((((((((((((...#.)))))))))))))).	1882	1928	1.0	-26.1	0	0.0002937184	0.412	-0.4862677071428573	-0.537208035	-9.546562468637928	14	16	14	3UTR	MIRT004571	1	1
hsa-miR-106b-5p	NM_138622	BCL2L11	TAAAGTGCTGACAGTGCAGAT#TCTGGTTGCAGGCTTTCCCATGGTCACAGGATGCACTGTCAGCATC#....((((((((((((((...#.)))))))))))))).	2007	2053	1.0	-26.1	0	0.0002937184	0.412	-0.4862677071428573	-0.537208035	-9.546562468637928	14	16	14	3UTR	MIRT004571	1	1
hsa-miR-106b-5p	NM_138623	BCL2L11	TAAAGTGCTGACAGTGCAGAT#TCTGGTTGCAGGCTTTCCCATGGTCACAGGATGCACTGTCAGCATC#....((((((((((((((...#.)))))))))))))).	1827	1873	1.0	-26.1	0	0.0002937184	0.412	-0.4862677071428573	-0.537208035	-9.546562468637928	14	16	14	3UTR	MIRT004571	1	1
hsa-miR-106b-5p	NM_138624	BCL2L11	TAAAGTGCTGACAGTGCAGAT#TCTGGTTGCAGGCTTTCCCATGGTCACAGGATGCACTGTCAGCATC#....((((((((((((((...#.)))))))))))))).	1915	1961	1.0	-26.1	0	0.0002937184	0.412	-0.4862677071428573	-0.537208035	-9.546562468637928	14	16	14	3UTR	MIRT004571	1	1
hsa-miR-106b-5p	NM_138625	BCL2L11	TAAAGTGCTGACAGTGCAGAT#TCTGGTTGCAGGCTTTCCCATGGTCACAGGATGCACTGTCAGCATC#....((((((((((((((...#.)))))))))))))).	1728	1774	1.0	-26.1	0	0.0002937184	0.412	-0.4862677071428573	-0.537208035	-9.546562468637928	14	16	14	3UTR	MIRT004571	1	1
hsa-miR-106b-5p	NM_138626	BCL2L11	TAAAGTGCTGACAGTGCAGAT#TCTGGTTGCAGGCTTTCCCATGGTCACAGGATGCACTGTCAGCATC#....((((((((((((((...#.)))))))))))))).	1778	1824	1.0	-26.1	0	0.0002937184	0.412	-0.4862677071428573	-0.537208035	-9.546562468637928	14	16	14	3UTR	MIRT004571	1	1
hsa-miR-106b-5p	NM_139068	MAPK9	TAAAGTGCTGACAGTGCAGAT#CTGTCAGCATTG#...(((((((((((.......#))))))))))).	1582	1594	1.0	-17.6	0	0.0001129558	0.529	1.7877165818181817	1.8103104937499999	-7.483038834232987	11	12	11	3UTR	MIRT005864	0	1
hsa-miR-106b-5p	NM_139069	MAPK9	TAAAGTGCTGACAGTGCAGAT#CTGTCAGCATTG#...(((((((((((.......#))))))))))).	1582	1594	1.0	-17.6	0	0.0001129558	0.529	-0.40464164545454556	0.6931930924999998	-7.483038834232987	11	12	11	3UTR	MIRT005864	0	1
hsa-miR-106b-5p	NM_139070	MAPK9	TAAAGTGCTGACAGTGCAGAT#CTGTCAGCATTG#...(((((((((((.......#))))))))))).	1577	1589	1.0	-17.6	0	0.0001129558	0.529	0.008142627272727283	0.32615912375	-7.483038834232987	11	12	11	3UTR	MIRT005864	0	1
hsa-miR-106b-5p	NM_145206	VTI1A	TAAAGTGCTGACAGTGCAGAT#ATCTGCACTGCCAAAAGCAGTC#...(.((((..((((((((((#)))))))))).....)))).).	1629	1651	1.0	-19.9	0	8.946755e-05	0.588	0.8939435	1.0161580137499997	-14.700858312229741	15	22	10	3UTR	MIRT439297	1	0
hsa-miR-106b-5p	NM_145231	EFCAB11	TAAAGTGCTGACAGTGCAGAT#GTTTGAAGCTTCAGTGAGCCATGATTGCACTGTCGCACTC#...(((((.((((((((((..#.))))))))))))))).	1409	1449	1.0	-23.5	0	0.0002019496	0.485	-0.22222020700000003	-0.19622939987500004	-7.570929851924502	15	17	15	3UTR	MIRT509747	0	0
hsa-miR-106b-5p	NM_152240	ZMAT3	TAAAGTGCTGACAGTGCAGAT#GTCTGCCTGTCTCTTATTGCACTA#...(((((.(((((.((((((#))))))))))).......))))).	5087	5111	1.0	-20.1	0	0.02299708	0.706	1.5449340000000003	0.4663159324999999	-8.306379412175136	16	24	11	3UTR	MIRT697412	0	0
hsa-miR-106b-5p	NM_152293	TADA2B	TAAAGTGCTGACAGTGCAGAT#CTGCCTGTTAGCCCA#....(.((((((((.((((..#)))))))))))).).	3783	3798	1.0	-19.2	0	0.0003713707	0.515	-0.7410596249999999	0.08803850499999999	-12.18297079008161	13	15	12	3UTR	MIRT439490	1	1
hsa-miR-106b-5p	NM_152362	TNFAIP8L1	TAAAGTGCTGACAGTGCAGAT#CTGCACTTCAGCCTG#...((.(((((.(((((((..#)))))))))))))).	1980	1995	1.0	-20.3	0	4.192444e-05	0.485	0.1809182857142857	0.006125959999999965	-11.76230226446814	14	15	14	3UTR	MIRT530005	0	0
hsa-miR-106b-5p	NM_001297622	HNRNPR	TAAAGTGCTGACAGTGCAGAT#TTGCACTGCGGACTTTAG#((((((.(((.((((((((..#))))))))))))))))).	2830	2848	1.0	-20.2	0	0.0001445782	0.603	0.0	0.0	-8.306035456483334	17	18	17	3UTR	MIRT506993	0	0
hsa-miR-106b-5p	NM_001300842	SLC10A7	TAAAGTGCTGACAGTGCAGAT#TGTGCTGAGCACTTTC#.((((((((..(((((((...#))))))))))))))).	2253	2269	1.0	-17.6	1	0.0007196542	0.544	0.34749955	0.8721489825	-7.8606057810956464	15	16	15	3UTR	MIRT044268	0	0
hsa-miR-106b-5p	NM_001300883	ZNF426	TAAAGTGCTGACAGTGCAGAT#TGCCTGTAATACCAGCACTTTGG#((((((((((((((.(((...#))))))).....)))))))))).	4493	4516	1.0	-20.2	1	0.0002574854	0.441	0.17999230263157898	-0.09497108749999998	-4.6730240064523	17	23	10	3UTR	MIRT685801	0	0
hsa-miR-106b-5p	NM_001300883	ZNF426	TAAAGTGCTGACAGTGCAGAT#GTCTGTGCTTCTGCACTG#...(((((.((.(((((((((#))))))))))).))))).	4355	4373	1.0	-19.7	0	7.941929e-06	0.559	-3.9261233611111113	-0.16976068749999995	-10.917733161520857	16	18	11	3UTR	MIRT685801	0	0
hsa-miR-106b-5p	NM_001301064	RRN3	TAAAGTGCTGACAGTGCAGAT#CTGCCTCGGCTGTGGCACTTC#..(((((((.(((((((((..#))))....)))))))))))).	2080	2101	1.0	-19.6	1	0.0006165336	0.471	0.0	0.0	-6.199507187700468	16	21	12	3UTR	MIRT554560	0	0
hsa-miR-106b-5p	NM_001301228	HMGB3	TAAAGTGCTGACAGTGCAGAT#TCTTCATTGTCAGCAA#.....(((((((((((.(((.#))).))))))))))).	1565	1581	1.0	-20.1	0	0.02868666	0.676	3.2610780000000004	2.97679644125	-13.6655996434504	14	16	11	3UTR	MIRT020449	1	1
hsa-miR-106b-5p	NM_001302509	MMP2	TAAAGTGCTGACAGTGCAGAT#GTTTGCTTTGTATGCACTTTGT#((((((((..((((.((((((#)))))).))))..)))))))).	2396	2418	1.0	-20.5	1	0.0588242	0.691	2.136039625	0.4416339262500001	-6.971920133026242	18	22	8	3UTR	MIRT438153	1	1
hsa-miR-106b-5p	NM_001302510	MMP2	TAAAGTGCTGACAGTGCAGAT#GTTTGCTTTGTATGCACTTTGT#((((((((..((((.((((((#)))))).))))..)))))))).	2389	2411	1.0	-20.5	1	0.0588242	0.691	2.136039625	0.4416339262500001	-6.971920133026242	18	22	8	3UTR	MIRT438153	1	1
hsa-miR-106b-5p	NM_001303470	TRAPPC14	TAAAGTGCTGACAGTGCAGAT#CTGCCCCTTATGTTTACGTTTGCAGCCTGAAGCACTTTAA#(((((((((..((((((((((#.)))))))..))).))))))))).	1926	1966	1.0	-20.9	1	0.01654092	0.632	0.03864461666666668	1.4903323149999996	-8.004855389940193	19	24	9	3UTR	MIRT441038	1	1
hsa-miR-106b-5p	NM_001304717	PTEN	TAAAGTGCTGACAGTGCAGAT#TTTGCACTGTTATTATTTTT#.((((((.((((((((((((.#)))))))))))).)))))).	4307	4327	1.0	-19.3	1	0.03376131	0.647	0.0	0.0	-6.106959766537749	18	20	12	3UTR	MIRT005865	1	0
hsa-miR-106b-5p	NM_001304717	PTEN	TAAAGTGCTGACAGTGCAGAT#TGTGCACTAAAGTGGGGGCTTTAA#((((((.((.((((((((.(.#).))))))...)).)).)))))).	5014	5038	1.0	-19.3	0	0.003260922	0.515	0.0	0.0	-6.723767449401163	17	24	6	3UTR	MIRT005865	1	0
hsa-miR-106b-5p	NM_001304794	DUSP18	TAAAGTGCTGACAGTGCAGAT#TCTGTGCACAGCACTTTAT#((((((((((...(((((((.#))))))).)))))))))).	2553	2572	1.0	-22.2	1	0.001593575	0.632	0.7354044999999999	0.7879253287500001	-11.398282843874613	17	19	10	3UTR	MIRT440768	0	0
hsa-miR-106b-5p	NM_001304796	DUSP18	TAAAGTGCTGACAGTGCAGAT#TCTGTGCACAGCACTTTAT#((((((((((...(((((((.#))))))).)))))))))).	2276	2295	1.0	-22.2	1	0.001593575	0.632	3.2804067000000003	2.4475790012500003	-11.398282843874613	17	19	10	3UTR	MIRT440768	0	0
hsa-miR-106b-5p	NM_001308339	DENND5B	TAAAGTGCTGACAGTGCAGAT#TTTGTATTGTTAGCAA#.....(((((((((((((((.#))))))))))))))).	9259	9275	1.0	-20.0	0	0.005394915	0.765	0.14177933333333334	0.03711648750000002	-13.6655996434504	15	16	15	3UTR	MIRT440828	1	1
hsa-miR-106b-5p	NM_001313892	HMGB1	TAAAGTGCTGACAGTGCAGAT#CTGCGCTGAACATCTGTACA#....((((.((((((((((..#))))))))....)).)))).	5284	5304	1.0	-17.8	0	0.02627698	0.574	0.0	0.0	-10.602952126883691	14	20	8	3UTR	MIRT511558	0	0
hsa-miR-106b-5p	NM_001316973	LZIC	TAAAGTGCTGACAGTGCAGAT#TCTGTACTGTAAACTACTAGGTGCTTTGC#(((((((((.((((((((((.#)))))))))).........))))))))).	1903	1932	1.0	-19.5	1	0.005697551	0.559	0.16129900000000003	-0.1932171625000001	-5.180080914529843	19	29	10	3UTR	MIRT506689	1	1
hsa-miR-106b-5p	NM_001317123	AGO1	TAAAGTGCTGACAGTGCAGAT#TCTGCACTGTCCTGCACTC#...(((((.(((((((((((.#)))))))))))..))))).	4171	4190	1.0	-27.6	0	0.001441562	0.5	1.1841507909090907	0.8821587825000001	-7.570929851924502	16	19	11	3UTR	MIRT020459	1	1
hsa-miR-106b-5p	NM_001317816	SLC10A7	TAAAGTGCTGACAGTGCAGAT#TGTGCTGAGCACTTTC#.((((((((..(((((((...#))))))))))))))).	2103	2119	1.0	-17.6	1	0.0007196542	0.544	0.7412477625	1.0732494049999999	-7.8606057810956464	15	16	15	3UTR	MIRT044268	0	0
hsa-miR-106b-5p	NM_001318056	ZNF426	TAAAGTGCTGACAGTGCAGAT#GTCTGTGCTTCTGCACTG#...(((((.((.(((((((((#))))))))))).))))).	4135	4153	1.0	-19.7	0	7.941929e-06	0.559	0.12556655555555557	-0.728042275	-10.917733161520857	16	18	11	3UTR	MIRT685801	0	0
hsa-miR-106b-5p	NM_001318203	VTI1A	TAAAGTGCTGACAGTGCAGAT#ATCTGCACTGCCAAAAGCAGTC#...(.((((..((((((((((#)))))))))).....)))).).	1650	1672	1.0	-19.9	0	8.946755e-05	0.588	0.8368753200000001	0.6044819087500001	-14.700858312229741	15	22	10	3UTR	MIRT439297	1	0
hsa-miR-106b-5p	NM_001318509	ACSL4	TAAAGTGCTGACAGTGCAGAT#GTGCTGCAGGGCTTTAA#((((((.(((.((((((....#))))))))).)))))).	2930	2947	1.0	-19.7	0	0.001324046	0.632	2.5659956666666672	4.439227024999999	-8.306035456483334	15	17	9	3UTR	MIRT175384	1	1
hsa-miR-106b-5p	NM_001319154	MPPE1	TAAAGTGCTGACAGTGCAGAT#TCTGCACAGCACA#....(((((....(((((((.#)))))))))))).	1419	1432	1.0	-17.5	0	0.0006773765	0.574	-0.007572414285714313	0.04943167875000003	-18.24977733463906	12	13	12	3UTR	MIRT783073	0	0
hsa-miR-106b-5p	NM_001320595	DDX5	TAAAGTGCTGACAGTGCAGAT#GCTTTGTCAGCT#......((((((((.((....#)).)))))))).	2646	2658	1.0	-16.0	0	0.0008444817	0.603	0.0	0.0	-16.30200796489408	10	12	8	3UTR	MIRT440832	1	1
hsa-miR-106b-5p	NM_001320596	DDX5	TAAAGTGCTGACAGTGCAGAT#GCTTTGTCAGCT#......((((((((.((....#)).)))))))).	2659	2671	1.0	-16.0	0	0.0008444817	0.603	0.0	0.0	-16.30200796489408	10	12	8	3UTR	MIRT440832	1	1
hsa-miR-106b-5p	NM_001320611	KPNA2	TAAAGTGCTGACAGTGCAGAT#GTTTGTTACTGTAGCACTTTT#.((((((((.(((((((((((#)))))).))))))))))))).	2298	2319	1.0	-20.3	1	0.01083523	0.676	2.3866892333333336	2.0710595750000005	-5.035831305685297	19	21	13	3UTR	MIRT147283	1	1
hsa-miR-106b-5p	NM_001320619	FAS	TAAAGTGCTGACAGTGCAGAT#GTCTGTGCTGTCTGCTCTC#...((.((.((((((((((((#)))))))))))).)).)).	2911	2930	1.0	-22.3	0	0.003659101	0.559	-0.66957305	-0.09835111499999998	-9.471888613117548	16	19	12	3UTR	MIRT438787	0	1
hsa-miR-106b-5p	NM_001321154	METTL8	TAAAGTGCTGACAGTGCAGAT#TCTGTACTTAGCACA#....((((((..((((((((.#)))))))))))))).	8447	8462	1.0	-18.9	0	0.004898618	0.691	0.0793755925	1.57121267725	-15.718140253644634	14	15	14	3UTR	MIRT692461	0	0
hsa-miR-106b-5p	NM_001321623	FAM126B	TAAAGTGCTGACAGTGCAGAT#TCTGTTATGTCAGACTA#...(((.((((((..(((((.#)))))..))))))))).	2967	2984	1.0	-17.9	0	0.0004514091	0.618	0.0	0.0	-9.650516206321099	14	17	9	3UTR	MIRT440687	1	1
hsa-miR-106b-5p	NM_001322237	RPS6KA5	TAAAGTGCTGACAGTGCAGAT#TCATGCCTGTAATCCCAGCACTTTGG#((((((((((((((.(((((.#)).))))))).....)))))))))).	21472	21498	1.0	-20.7	1	0.0002270312	0.368	0.31226664210526317	0.0044560174999999785	-4.6730240064523	19	26	10	3UTR	MIRT534571	1	1
hsa-miR-106b-5p	NM_001322815	SOD2	TAAAGTGCTGACAGTGCAGAT#GCTCCTAGTTACTGTTAGCATTTTT#.(((((((((((((((.....#.))))))))))))))).	12676	12701	1.0	-19.4	1	0.03384546	0.735	0.09403700000000001	-0.030653512499999983	-3.793324837357118	15	17	15	3UTR	MIRT439567	0	0
hsa-miR-106b-5p	NM_001323572	CCP110	TAAAGTGCTGACAGTGCAGAT#CTGTACTCCCAGCATTTTGT#((((((((((..(((((((..#)))))))..)))))))))).	4136	4156	1.0	-21.8	1	0.007523746	0.397	0.0314565	-0.024062699999999992	-10.10915223120837	17	20	10	3UTR	MIRT142099	0	1
hsa-miR-106b-5p	NM_000038	APC	TAAAGTGCTGACAGTGCAGAT#GTATAATCAGCACTTTGC#(((((((((((..((((....#))))..))))))))))).	9983	10001	1.0	-19.5	1	0.001870437	0.588	0.5297784000000001	0.075443895	-8.573508368464264	15	18	11	3UTR	MIRT007071	0	0
hsa-miR-106b-5p	NM_000043	FAS	TAAAGTGCTGACAGTGCAGAT#GTCTGTGCTGTCTGCTCTC#...((.((.((((((((((((#)))))))))))).)).)).	2994	3013	1.0	-22.3	0	0.003659101	0.559	-0.66957305	-0.09835111499999998	-9.471888613117548	16	19	12	3UTR	MIRT438787	0	1
hsa-miR-106b-5p	NM_000314	PTEN	TAAAGTGCTGACAGTGCAGAT#TTTGCACTGTTATTATTTTT#.((((((.((((((((((((.#)))))))))))).)))))).	4308	4328	1.0	-19.3	1	0.03376131	0.647	0.0	0.0	-6.106959766537749	18	20	12	3UTR	MIRT005865	1	0
hsa-miR-106b-5p	NM_000314	PTEN	TAAAGTGCTGACAGTGCAGAT#TGTGCACTAAAGTGGGGGCTTTAA#((((((.((.((((((((.(.#).))))))...)).)).)))))).	5015	5039	1.0	-19.3	0	0.003260922	0.515	0.0	0.0	-6.723767449401163	17	24	6	3UTR	MIRT005865	1	0
hsa-miR-106b-5p	NM_000332	ATXN1	TAAAGTGCTGACAGTGCAGAT#GTCCTGTCAGTATTTG#..((((((((((((.((....#)).)))))))))))).	9961	9977	1.0	-18.9	1	0.001082048	0.574	0.0	0.0	-5.692450279622925	14	16	12	3UTR	MIRT441140	1	1
hsa-miR-106b-5p	NM_000636	SOD2	TAAAGTGCTGACAGTGCAGAT#GCTCCTAGTTACTGTTAGCATTTTT#.(((((((((((((((.....#.))))))))))))))).	12856	12881	1.0	-19.4	1	0.03384546	0.735	0.0	0.0	-3.793324837357118	15	17	15	3UTR	MIRT439567	0	0
hsa-miR-106b-5p	NM_000961	PTGIS	TAAAGTGCTGACAGTGCAGAT#TCTCAGTGTCAGCACTC#...((((((((((.((.(((.#))))).)))))))))).	2226	2243	1.0	-22.8	0	0.0003713899	0.441	0.0	0.0	-7.371380111199145	15	17	10	3UTR	MIRT685973	0	0
hsa-miR-106b-5p	NM_001002838	WNK3	TAAAGTGCTGACAGTGCAGAT#CACTGTCAAGTTGCACTTTAC#((((((((((((((((.....#))))))))....)))))))).	7175	7196	1.0	-20.3	1	0.0001408387	0.574	0.0	0.0	-3.937574446201665	16	21	8	3UTR	MIRT448316	1	1
hsa-miR-106b-5p	NM_001002838	WNK3	TAAAGTGCTGACAGTGCAGAT#ATCTGCCTTTCAGCAACTG#...((((((((.((.((((((#)))))))).)))))).)).	11034	11053	1.0	-19.4	0	0.00771136	0.662	0.0	0.0	-10.596793063525729	16	19	8	3UTR	MIRT448316	1	1
hsa-miR-106b-5p	NM_001002860	BTBD7	TAAAGTGCTGACAGTGCAGAT#CTGCATAACCAGTACTTTGT#((((((((((...((((((..#))))))...)))))))))).	8178	8198	1.0	-20.3	1	0.00212717	0.662	0.0	0.0	-11.398282843874613	16	20	10	3UTR	MIRT441098	1	1
hsa-miR-106b-5p	NM_001003698	RREB1	TAAAGTGCTGACAGTGCAGAT#TCCAGTCTGTCAGCATTA#...(((((((((((....((.#))....))))))))))).	6117	6135	1.0	-17.7	0	0.02167548	0.559	0.0	0.0	-7.483038834232987	13	18	11	3UTR	MIRT044319	0	0
hsa-miR-106b-5p	NM_001003699	RREB1	TAAAGTGCTGACAGTGCAGAT#TCCAGTCTGTCAGCATTA#...(((((((((((....((.#))....))))))))))).	6282	6300	1.0	-17.7	0	0.02167548	0.559	0.0	0.0	-7.483038834232987	13	18	11	3UTR	MIRT044319	0	0
hsa-miR-106b-5p	NM_001003700	RREB1	TAAAGTGCTGACAGTGCAGAT#TCCAGTCTGTCAGCATTA#...(((((((((((....((.#))....))))))))))).	5484	5502	1.0	-17.7	0	0.02167548	0.559	0.0	0.0	-7.483038834232987	13	18	11	3UTR	MIRT044319	0	0
hsa-miR-106b-5p	NM_001005386	ACTR2	TAAAGTGCTGACAGTGCAGAT#CTGTACTGCTGCAGCTTTAA#((((((((.(.((((((((..#))))))))).))).))))).	1755	1775	1.0	-19.7	1	1.169912e-05	0.574	0.0	0.0	-7.8187385798577775	17	20	9	3UTR	MIRT512324	0	0
hsa-miR-106b-5p	NM_001008541	MXI1	TAAAGTGCTGACAGTGCAGAT#CTGCATTGTTAGCACTA#...((((((((((((((((..#)))))))))))))))).	1338	1355	1.0	-27.7	0	0.01571085	0.471	1.8237409375000002	1.8107792749999996	-6.514540193678739	16	17	16	3UTR	MIRT020453	1	1
hsa-miR-106b-5p	NM_001013746	ZNF107	TAAAGTGCTGACAGTGCAGAT#TCTGCACTTTTAGATACTTTAG#(((((((((((.((((((((.#)))))))).)))).))))))).	5661	5683	1.0	-22.3	1	0.0278849	0.676	0.0	0.0	-7.284377755798021	19	22	8	3UTR	MIRT551129	0	1
hsa-miR-106b-5p	NM_001015877	PHF6	TAAAGTGCTGACAGTGCAGAT#TCTGCAGCTGATAGAGCAGCATTTTAA#((((((((((.(((((((((.#)))))).)))......)))))))))).	2634	2661	1.0	-20.7	1	0.005419606	0.647	0.0	0.0	-6.7623489216120145	19	27	10	3UTR	MIRT175650	1	1
hsa-miR-106b-5p	NM_001017369	MSMO1	TAAAGTGCTGACAGTGCAGAT#GTCCTTCTTGATTGCAGTGCAGTACTG#...(((((((.((.(((((..#.))))).))))))))).	1606	1633	1.0	-18.9	0	0.0002771586	0.588	0.0	0.0	-10.196154586609497	14	17	9	3UTR	MIRT164529	1	0
hsa-miR-106b-5p	NM_001023563	ZNF805	TAAAGTGCTGACAGTGCAGAT#ATTTGCGCTGAAGACACTTTAC#(((((((((..((((((((((#)))))))))).)).))))))).	8117	8139	1.0	-21.3	1	0.009924621	0.618	0.0	0.0	-8.004855389940193	19	22	10	3UTR	MIRT201023	1	1
hsa-miR-106b-5p	NM_001023563	ZNF805	TAAAGTGCTGACAGTGCAGAT#TGTGCACTGTCGCCACC#....(((.((((((((((.(.#).)))))))))).))).	7813	7830	1.0	-20.8	0	0.02421152	0.529	0.0	0.0	-11.86019739781856	14	17	10	3UTR	MIRT201023	1	1
hsa-miR-106b-5p	NM_001023563	ZNF805	TAAAGTGCTGACAGTGCAGAT#CTGCACTGGCTTCAGAATCCATGTCCTTAACCACTTTAT#(((((((((((((((((((..#))))))))...))))................))))))).	8506	8545	1.0	-20.2	1	0.1127272	0.559	0.0	0.0	-3.937574446201665	19	39	8	3UTR	MIRT201023	1	1
hsa-miR-106b-5p	NM_001024847	TGFBR2	TAAAGTGCTGACAGTGCAGAT#TTTGTTTGGTCAGCACA#....((((((((...(((((.#)))))...)))))))).	3325	3342	1.0	-19.2	0	0.002367763	0.618	0.33350888749999996	0.33026470375000005	-12.427982559075213	13	17	8	3UTR	MIRT091689	1	1
hsa-miR-106b-5p	NM_001025105	CSNK1A1	TAAAGTGCTGACAGTGCAGAT#GCCTGTGATTCCAGCACTTTGG#((((((((((((((.((....#)))))).....)))))))))).	5090	5112	1.0	-19.5	1	3.913266e-05	0.412	0.0	0.0	-4.6730240064523	16	22	10	3UTR	MIRT478719	1	0
hsa-miR-106b-5p	NM_001025107	ADAR	TAAAGTGCTGACAGTGCAGAT#TGTGCATTCTTTGAATAGTCACTCGTAAAAACTGTCAGTGCTTG#..(((((((((((((......#.))))))))))))).	5175	5219	1.0	-20.0	1	0.007690984	0.632	0.0	0.0	-5.1900497996759025	13	15	13	3UTR	MIRT482480	1	0
hsa-miR-106b-5p	NM_001025366	VEGFA	TAAAGTGCTGACAGTGCAGAT#TCTGCGCAGAGCACTTTGG#(((((((((....(((((((.#)))))))..))))))))).	1901	1920	1.0	-22.0	1	0.00375543	0.397	0.0	0.0	-12.640789312202793	16	19	9	3UTR	MIRT004466	1	1
hsa-miR-106b-5p	NM_001025367	VEGFA	TAAAGTGCTGACAGTGCAGAT#TCTGCGCAGAGCACTTTGG#(((((((((....(((((((.#)))))))..))))))))).	1832	1851	1.0	-22.0	1	0.00375543	0.397	0.0	0.0	-12.640789312202793	16	19	9	3UTR	MIRT004466	1	1
hsa-miR-106b-5p	NM_001025368	VEGFA	TAAAGTGCTGACAGTGCAGAT#TCTGCGCAGAGCACTTTGG#(((((((((....(((((((.#)))))))..))))))))).	1778	1797	1.0	-22.0	1	0.00375543	0.397	0.0	0.0	-12.640789312202793	16	19	9	3UTR	MIRT004466	1	1
hsa-miR-106b-5p	NM_001025369	VEGFA	TAAAGTGCTGACAGTGCAGAT#TCTGCGCAGAGCACTTTGG#(((((((((....(((((((.#)))))))..))))))))).	1743	1762	1.0	-22.0	1	0.00375543	0.397	0.0	0.0	-12.640789312202793	16	19	9	3UTR	MIRT004466	1	1
hsa-miR-106b-5p	NM_001025370	VEGFA	TAAAGTGCTGACAGTGCAGAT#TCTGCGCAGAGCACTTTGG#(((((((((....(((((((.#)))))))..))))))))).	1646	1665	1.0	-22.0	1	0.00375543	0.397	0.0	0.0	-12.640789312202793	16	19	9	3UTR	MIRT004466	1	1
hsa-miR-106b-5p	NM_001029863	C6orf120	TAAAGTGCTGACAGTGCAGAT#GTCTTAACAGCATTCTTTCAAGTCCTGGTGTACTCTGCTGACAGCACTTTAA#((((((((((.((..(((((.#.))))))).)))))))))).	2330	2382	1.0	-21.6	1	0.0008927571	0.618	0.0	0.0	-8.354638399383056	17	20	10	3UTR	MIRT044361	1	1
hsa-miR-106b-5p	NM_001031617	COX19	TAAAGTGCTGACAGTGCAGAT#CTGCAATCCCAGCACTTTAG#((((((((((....(((((..#)))))....)))))))))).	3259	3279	1.0	-21.9	1	0.002998576	0.368	0.0	0.0	-12.25512276139502	15	20	10	3UTR	MIRT517023	0	0
hsa-miR-106b-5p	NM_001033045	GPR155	TAAAGTGCTGACAGTGCAGAT#CTGTAATCTCAGCACTTTGG#(((((((((((...(((((..#)))))...))))))))))).	4159	4179	1.0	-21.6	1	0.0005305761	0.426	0.0	0.0	-9.430348285984671	16	20	11	3UTR	MIRT508839	0	0
hsa-miR-106b-5p	NM_001033045	GPR155	TAAAGTGCTGACAGTGCAGAT#CTGCAATCCCAGCACTTTGG#((((((((((....(((((..#)))))....)))))))))).	6025	6045	1.0	-21.6	1	1.772964e-05	0.382	0.0	0.0	-12.25512276139502	15	20	10	3UTR	MIRT508839	0	0
hsa-miR-106b-5p	NM_001033583	ACOT9	TAAAGTGCTGACAGTGCAGAT#TTGCAACTGTCAGTATA#....(((((((((((((((..#))))).)))))))))).	2066	2083	1.0	-21.2	0	0.01595447	0.618	0.0	0.0	-9.546562468637928	15	17	10	3UTR	MIRT692092	0	0
hsa-miR-106b-5p	NM_001033756	VEGFA	TAAAGTGCTGACAGTGCAGAT#TCTGCGCAGAGCACTTTGG#(((((((((....(((((((.#)))))))..))))))))).	1712	1731	1.0	-22.0	1	0.00375543	0.397	0.0	0.0	-12.640789312202793	16	19	9	3UTR	MIRT004466	1	1
hsa-miR-106b-5p	NM_001035254	FAM102A	TAAAGTGCTGACAGTGCAGAT#CTGCCCCCTACTAAAGCCTCTGCTCTCAGCACTTTC#.((((((((((..(.(((((.#.))))).))))))))))).	3156	3192	1.0	-21.2	1	0.004836617	0.456	0.0	0.0	-9.164708319870352	16	19	11	3UTR	MIRT440694	1	1
hsa-miR-106b-5p	NM_001035260	VPS26A	TAAAGTGCTGACAGTGCAGAT#CTGCACTGTAGCT#......(((.(((((((((..#)))))))))))).	3983	3996	1.0	-19.5	0	0.001121282	0.544	0.0	0.0	-16.80906487297163	12	13	12	3UTR	MIRT127164	1	1
hsa-miR-106b-5p	NM_001037171	ACOT9	TAAAGTGCTGACAGTGCAGAT#TTGCAACTGTCAGTATA#....(((((((((((((((..#))))).)))))))))).	2093	2110	1.0	-21.2	0	0.01595447	0.618	0.0	0.0	-9.546562468637928	15	17	10	3UTR	MIRT692092	0	0
hsa-miR-106b-5p	NM_001039199	TTPAL	TAAAGTGCTGACAGTGCAGAT#TCTGCATTTCAGCACTTTAG#(((((((((((.((((((((.#))))))))))))))))))).	2851	2871	1.0	-27.0	1	0.002104483	0.559	0.0	0.0	-7.284377755798021	19	20	19	3UTR	MIRT044377	1	1
hsa-miR-106b-5p	NM_001039702	OLAH	TAAAGTGCTGACAGTGCAGAT#CTGGCAGCACTTTGG#((((((((((.(((.......#))).)))))))))).	1181	1196	1.0	-17.3	1	5.482626e-06	0.441	0.0	0.0	-7.730847562166263	13	15	10	3UTR	MIRT783075	0	0
hsa-miR-106b-5p	NM_001039802	CDC42	TAAAGTGCTGACAGTGCAGAT#TCTGCACAGCTGGTGTCGGCATC#....((((((((((((((((.#)))))))......))))))))).	805	828	1.0	-22.7	0	0.0001789324	0.574	0.0	0.0	-9.546562468637928	16	23	9	3UTR	MIRT044369	0	0
hsa-miR-106b-5p	NM_001040445	ASB1	TAAAGTGCTGACAGTGCAGAT#GCACTGCAGCATTTC#..((((((((.((((((....#)))))))))))))).	5242	5257	1.0	-21.9	1	0.003240624	0.426	0.0	0.0	-7.7817751947826395	14	15	14	3UTR	MIRT158291	0	1
hsa-miR-106b-5p	NM_001042482	TPK1	TAAAGTGCTGACAGTGCAGAT#GCATTTTCGGCACTTTT#.((((((((((.(((((....#))))).)))))))))).	2064	2081	1.0	-20.7	1	0.006308969	0.515	0.0	0.0	-7.140128146953473	15	17	10	3UTR	MIRT525490	0	0
hsa-miR-107	NM_001375635	CDC42SE2	AGCAGCATTGTACAGGGCTATCA#ATGGGCTGATGATGCTGCTA#(((((((((((.(((..((((..#)))).)))))))))))))).	2141	2161	0.9615384615384616	-20.3	1	0.01282565	0.588	0.0	0.0	-7.517426836101634	18	20	14	3UTR	MIRT256308	0	0
hsa-miR-107	NM_001195573	DICER1	AGCAGCATTGTACAGGGCTATCA#TGATGCTTCGTGGAATGCTGCA#.((((((((.(((.((((.((((#)))))))).))).)))))))).	7271	7293	0.9615384615384616	-24.5	1	0.0003095125	0.632	5.660535375	5.757467605	-5.892671223205703	19	22	8	3UTR	MIRT005348	1	1
hsa-miR-107	NM_001267843	CLOCK	AGCAGCATTGTACAGGGCTATCA#GGTAACTTGACAGTGCTGTG#.((((((((((.((((..((((.#)))).)))))))))))))).	6752	6772	0.9615384615384616	-21.8	1	0.01414719	0.529	1.7871646	2.48289081	-7.140128146953473	18	20	14	3UTR	MIRT732507	1	1
hsa-miR-107	NM_001271282	DICER1	AGCAGCATTGTACAGGGCTATCA#TGATGCTTCGTGGAATGCTGCA#.((((((((.(((.((((.((((#)))))))).))).)))))))).	7613	7635	0.9615384615384616	-24.5	1	0.0003095125	0.632	5.43945965	5.549997165	-5.892671223205703	19	22	8	3UTR	MIRT005348	1	1
hsa-miR-107	NM_020240	CDC42SE2	AGCAGCATTGTACAGGGCTATCA#ATGGGCTGATGATGCTGCTA#(((((((((((.(((..((((..#)))).)))))))))))))).	1332	1352	0.9615384615384616	-20.3	1	0.01282565	0.588	0.8835996727272728	0.5688647762499999	-7.517426836101634	18	20	14	3UTR	MIRT256308	0	0
hsa-miR-107	NM_030621	DICER1	AGCAGCATTGTACAGGGCTATCA#TGATGCTTCGTGGAATGCTGCA#.((((((((.(((.((((.((((#)))))))).))).)))))))).	7681	7703	0.9615384615384616	-24.5	1	0.0003095125	0.632	4.52114175	5.060227359999999	-5.892671223205703	19	22	8	3UTR	MIRT005348	1	1
hsa-miR-107	NM_004898	CLOCK	AGCAGCATTGTACAGGGCTATCA#GGTAACTTGACAGTGCTGTG#.((((((((((.((((..((((.#)))).)))))))))))))).	6243	6263	0.9615384615384616	-21.8	1	0.01414719	0.529	2.5616364000000003	2.8024931175	-7.140128146953473	18	20	14	3UTR	MIRT732507	1	1
hsa-miR-107	NM_006482	DYRK2	AGCAGCATTGTACAGGGCTATCA#TTCTGTGAGATGCTGCTG#(((((((((.(((((((......#))))))).))))))))).	5954	5972	0.9615384615384616	-21.2	1	0.02650639	0.691	5.750873333333334	4.2062490425	-5.180080914529843	16	18	9	3UTR	MIRT066664	1	1
hsa-miR-107	NM_001126336	VCAN	AGCAGCATTGTACAGGGCTATCA#TGAATGTTCATGTATGAATGCTGCA#.(((((((((((((((((..(((#)))..)))).))))).)))))))).	3204	3229	0.9615384615384616	-21.7	1	0.003598341	0.706	4.858534736842106	4.616480219999999	-3.793324837357118	20	25	8	3UTR	MIRT314709	1	1
hsa-miR-107	NM_001321852	JAK1	AGCAGCATTGTACAGGGCTATCA#GATAGCTGTGGAATAGATAATTTGCTGCA#.((((((((((.((.(((((((.#))))))).))..))))......)))))).	4341	4370	0.9615384615384616	-23.1	1	0.005379807	0.574	4.5832832375	3.5000577849999996	-7.875577707204108	19	29	7	3UTR	MIRT054776	0	1
hsa-miR-107	NM_001038702	CDC42SE2	AGCAGCATTGTACAGGGCTATCA#ATGGGCTGATGATGCTGCTA#(((((((((((.(((..((((..#)))).)))))))))))))).	1163	1183	0.9615384615384616	-20.3	1	0.01282565	0.588	0.0	0.0	-7.517426836101634	18	20	14	3UTR	MIRT256308	0	0
hsa-miR-107	NM_001284257	GUCD1	AGCAGCATTGTACAGGGCTATCA#GGTGGCCCAGGAGTACCCATGCACAGCAGCTGTGGGGTGTGGGCA#.((.(((((.((((((((((((.#))))))))......................)))).)))))..)).	2558	2603	0.9692307692307692	-22.8	0	2.322113e-06	0.471	3.5813691705882356	2.41327063	-8.067853580644487	19	45	8	3UTR	MIRT026969	0	0
hsa-miR-107	NM_001114635	PLAG1	AGCAGCATTGTACAGGGCTATCA#TGGCACTGTAAGCAATGCTA#...((((((((((((.((((...#)))).))))..)))))))).	4676	4696	0.9692307692307692	-19.1	0	0.0005102415	0.603	0.8451702142857141	0.6738410825000001	-6.747589273982352	16	20	8	3UTR	MIRT000371	1	0
hsa-miR-107	NM_017649	CNNM2	AGCAGCATTGTACAGGGCTATCA#TAGCCCAGTGAAATGCTGTC#.((((((((.(((.((((((...#)))))).))).)))))))).	10051	10071	0.9807692307692307	-24.2	1	0.004676746	0.559	-0.37780805	-0.3525681900000001	-5.892671223205703	17	20	8	3UTR	MIRT055242	1	1
hsa-miR-107	NM_001330698	YTHDC1	AGCAGCATTGTACAGGGCTATCA#GGTTCAGTAAAAATAATGCTGCTA#(((((((((((((.(((((....#))))).))....))))))))))).	2942	2966	1.0	-19.2	1	0.001136309	0.632	3.6706994117647063	1.62215967125	-4.794414363722071	18	24	11	3UTR	MIRT505118	1	1
hsa-miR-107	NM_001346663	TK1	AGCAGCATTGTACAGGGCTATCA#GCCCTGCATGCTGCC#.((((((.((..((((((.....#)))))))))))))).	655	670	1.0	-22.0	1	0.0004540737	0.309	-0.2688110333333333	0.7923005987500003	-12.278537551544455	14	15	14	3UTR	MIRT695293	0	0
hsa-miR-107	NM_001351156	BAZ2A	AGCAGCATTGTACAGGGCTATCA#GATAGCTATCCCCTGTATGATGTTGG#..((((((((((((((((((((.#)))))).....)))))))))))))).	6665	6691	1.0	-27.1	1	0.0001747584	0.485	2.7082635782799995	2.8181949639250004	-4.95700071937229	20	26	14	3UTR	MIRT543064	1	1
hsa-miR-107	NM_001355019	PPP2CA	AGCAGCATTGTACAGGGCTATCA#TGAGTGTAGTAAATAAAAGTTTTCTTGCTTTGTGCTGTGTTGA#..((((((.(((((((((.....#.))))))))).)))))).	2650	2693	1.0	-20.4	1	0.0006179079	0.647	0.0	0.0	-6.013390377618052	15	18	9	3UTR	MIRT512474	0	0
hsa-miR-107	NM_001360236	JOSD1	AGCAGCATTGTACAGGGCTATCA#TGGGCCTGTGCAAATGGCA#.((....(((((((((.(((...#))).)))))))))...)).	3333	3352	1.0	-19.9	0	4.097153e-05	0.471	0.0	0.0	-14.389029583193146	14	19	9	3UTR	MIRT475052	1	0
hsa-miR-107	NM_001361665	FGF2	AGCAGCATTGTACAGGGCTATCA#AGTCCTGTGTAAACTGCTGG#..(((((((((((((((((....#))))))))))))..))))).	1307	1327	1.0	-20.8	1	0.0002690638	0.632	0.0	0.0	-4.95700071937229	17	20	12	3UTR	MIRT211265	1	1
hsa-miR-107	NM_001363597	POLD3	AGCAGCATTGTACAGGGCTATCA#GTGGCTTTGTATAGCAAGCTGA#..((((.((((((((((((((..#))))))))))))))...)))).	3190	3212	1.0	-21.1	0	5.030765e-05	0.588	0.0	0.0	-6.5006872542436085	18	22	14	3UTR	MIRT500135	0	1
hsa-miR-107	NM_001363597	POLD3	AGCAGCATTGTACAGGGCTATCA#TGATGGATGGTAACAGTGTTGCA#.((((((((((((....((((((#))))))...))).))))))))).	3686	3709	1.0	-21.2	1	0.00295169	0.618	0.0	0.0	-5.618663395431772	18	23	9	3UTR	MIRT500135	0	1
hsa-miR-107	NM_001363848	TK1	AGCAGCATTGTACAGGGCTATCA#GCCCTGCATGCTGCC#.((((((.((..((((((.....#)))))))))))))).	1068	1083	1.0	-22.0	1	0.0004540737	0.309	0.0	0.0	-12.278537551544455	14	15	14	3UTR	MIRT695293	0	0
hsa-miR-107	XM_024448113	PLEKHA1	AGCAGCATTGTACAGGGCTATCA#ATGGTCTTGTTGATGCTGCTC#((((((((((.((((((((((..#)))))))))))))))))))).	7270	7291	1.0	-25.1	1	0.004260644	0.574	0.0	0.0	-6.7623489216120145	20	21	20	3UTR	MIRT055814	1	1
hsa-miR-107	XM_024450395	SIAH1	AGCAGCATTGTACAGGGCTATCA#TGTGAGTCAATACATAGTGCTGCTG#(((((((((((....((((..((#))..)))).....))))))))))).	1373	1398	1.0	-20.3	1	0.0007456652	0.632	0.0	0.0	-10.165797846235305	17	25	11	3UTR	MIRT735183	0	0
hsa-miR-107	XM_047416465	G3BP2	AGCAGCATTGTACAGGGCTATCA#TGGTAATTTTGTACAGTATAGTGTATGAATTGCTGTGCTGCA#.((((((((((((((((.(((((#))))).)))))))))...................))))))).	2957	2999	1.0	-20.7	1	1.878987e-06	0.662	0.0	0.0	-3.793324837357118	21	42	9	3UTR	MIRT507187	1	1
hsa-miR-107	XM_047416466	G3BP2	AGCAGCATTGTACAGGGCTATCA#TGGTAATTTTGTACAGTATAGTGTATGAATTGCTGTGCTGCA#.((((((((((((((((.(((((#))))).)))))))))...................))))))).	2858	2900	1.0	-20.7	1	1.878987e-06	0.662	0.0	0.0	-3.793324837357118	21	42	9	3UTR	MIRT507187	1	1
hsa-miR-107	XM_047417315	PIK3R1	AGCAGCATTGTACAGGGCTATCA#GCCCAGGATGCTGCTA#(((((((((.(...((((.....#))))).))))))))).	7549	7565	1.0	-21.9	1	0.0006256051	0.662	0.0	0.0	-10.67285475431285	14	16	9	3UTR	MIRT314098	1	1
hsa-miR-107	XM_047428552	SETD1B	AGCAGCATTGTACAGGGCTATCA#GGCCTCTTCCTGTGAATGCTGCTA#(((((((((.(((((((......#.)))))))))))))))).	6269	6293	1.0	-23.2	1	0.01801405	0.529	0.0	0.0	-5.180080914529843	16	18	16	3UTR	MIRT270553	1	0
hsa-miR-107	XM_047441072	NUP50	AGCAGCATTGTACAGGGCTATCA#GTCCTGTTACAGATGCTGTC#.(((((((((((((((((.....#))))))).)))).)))))).	3157	3177	1.0	-23.2	1	0.0005092081	0.5	0.0	0.0	-3.793324837357118	17	20	7	3UTR	MIRT088206	1	1
hsa-miR-107	XM_047441312	SUN2	AGCAGCATTGTACAGGGCTATCA#GCCCAGGTAAGATATGCTGCTA#((((((((..(((.((((.....#))))..)))....)))))))).	3729	3751	1.0	-22.8	1	0.004253596	0.471	0.0	0.0	-7.093310490296013	15	22	8	3UTR	MIRT553902	1	1
hsa-miR-107	XM_047441687	JOSD1	AGCAGCATTGTACAGGGCTATCA#TGGGCCTGTGCAAATGGCA#.((....(((((((((.(((...#))).)))))))))...)).	3514	3533	1.0	-19.9	0	4.097153e-05	0.471	0.0	0.0	-14.389029583193146	14	19	9	3UTR	MIRT475052	1	0
hsa-miR-107	NM_152695	ZNF449	AGCAGCATTGTACAGGGCTATCA#TGCTAGACCCAGGATGTATCTTTAATTCTTGTCATCCAGGTCAACATATGATGCTGCTA#((((((((((((...((((....#.))))....)))))))))))).	3499	3558	1.0	-20.1	1	0.07584943	0.603	2.2724345833333337	1.5944070400000003	-6.818994536638949	16	22	12	3UTR	MIRT229346	1	1
hsa-miR-107	NM_153029	N4BP1	AGCAGCATTGTACAGGGCTATCA#GCCCTCTGCCGTCCAGATGCTGCA#.(((((((((((.(((((.....#))))).)))......)))))))).	6532	6556	1.0	-22.9	1	0.0004386187	0.397	4.539790294117648	3.8869888475000005	-5.08245545002336	16	24	8	3UTR	MIRT574598	1	1
hsa-miR-107	NM_153645	NUP50	AGCAGCATTGTACAGGGCTATCA#GTCCTGTTACAGATGCTGTC#.(((((((((((((((((.....#))))))).)))).)))))).	3268	3288	1.0	-23.2	1	0.0005092081	0.5	0.0	0.0	-3.793324837357118	17	20	7	3UTR	MIRT088206	1	1
hsa-miR-107	NM_175634	RUNX1T1	AGCAGCATTGTACAGGGCTATCA#CCCTGTGAATGCTGTTA#(((((((((.(((((((......#)))))))))))))))).	6839	6856	1.0	-22.8	1	0.02205914	0.632	0.03159918111111112	0.03277229024999998	-5.180080914529843	16	17	16	3UTR	MIRT546624	1	1
hsa-miR-107	NM_177438	DICER1	AGCAGCATTGTACAGGGCTATCA#TGATGCTTCGTGGAATGCTGCA#.((((((((.(((.((((.((((#)))))))).))).)))))))).	7734	7756	1.0	-24.5	1	0.0003095125	0.632	0.0	0.0	-5.892671223205703	19	22	8	3UTR	MIRT005348	1	1
hsa-miR-107	NM_177559	CSNK2A1	AGCAGCATTGTACAGGGCTATCA#GATAGAAACTGAAACAATGCTGTG#.((((((((((.(((..(((((.#)))))...)))..)))))))))).	7893	7917	1.0	-22.8	1	0.015239	0.515	0.0	0.0	-7.373177227257086	18	24	10	3UTR	MIRT513959	0	0
hsa-miR-107	NM_181054	HIF1A	AGCAGCATTGTACAGGGCTATCA#AGCCTGGCTACAATACTGCA#.((((.(((((((.(((((....#))))).).)))))).)))).	2734	2754	1.0	-19.7	0	0.04957516	0.632	4.701935875	3.59089309	-6.55112351607057	16	20	6	3UTR	MIRT004487	0	0
hsa-miR-107	NM_181504	PIK3R1	AGCAGCATTGTACAGGGCTATCA#GCCCAGGATGCTGCTA#(((((((((.(...((((.....#))))).))))))))).	5157	5173	1.0	-21.9	1	0.0006256051	0.662	0.0	0.0	-10.67285475431285	14	16	9	3UTR	MIRT314098	1	1
hsa-miR-107	NM_181504	PIK3R1	AGCAGCATTGTACAGGGCTATCA#AGTCCAACAATGTTGTTT#(((((((((((...(((((....#))))).))))))))))).	2610	2628	1.0	-18.8	1	0.0001535361	0.647	0.0	0.0	-9.430348285984671	16	18	11	3UTR	MIRT314098	1	1
hsa-miR-107	NM_181524	PIK3R1	AGCAGCATTGTACAGGGCTATCA#GCCCAGGATGCTGCTA#(((((((((.(...((((.....#))))).))))))))).	5219	5235	1.0	-21.9	1	0.0006256051	0.662	0.0	0.0	-10.67285475431285	14	16	9	3UTR	MIRT314098	1	1
hsa-miR-107	NM_181524	PIK3R1	AGCAGCATTGTACAGGGCTATCA#AGTCCAACAATGTTGTTT#(((((((((((...(((((....#))))).))))))))))).	2672	2690	1.0	-18.8	1	0.0001535361	0.647	0.0	0.0	-9.430348285984671	16	18	11	3UTR	MIRT314098	1	1
hsa-miR-107	NM_181672	OGT	AGCAGCATTGTACAGGGCTATCA#TGACTGCCCCTTCTATGCTGCTT#((((((((.(....((((..(((#)))..))))...).)))))))).	4228	4251	1.0	-21.6	1	0.03368283	0.588	0.39702336250000003	0.387256035	-13.311512419640783	16	23	8	3UTR	MIRT110054	1	1
hsa-miR-107	NM_181741	ORC4	AGCAGCATTGTACAGGGCTATCA#TGGCTCTGTTTATATGCTGG#..((((((...(((((((((...#)))))))))....)))))).	5248	5268	1.0	-21.8	1	0.005981381	0.691	0.0	0.0	-10.080671321356581	15	20	9	3UTR	MIRT498971	0	0
hsa-miR-107	NM_181741	ORC4	AGCAGCATTGTACAGGGCTATCA#TGATTACAGTAACATTCTGTACAGTGCTATAGCTG#(((((((((((((((((......#.))))))))))))))...))).	2245	2280	1.0	-21.6	1	0.0001317142	0.632	0.0	0.0	-3.937574446201665	17	22	14	3UTR	MIRT498971	0	0
hsa-miR-107	NM_181742	ORC4	AGCAGCATTGTACAGGGCTATCA#TGATTACAGTAACATTCTGTACAGTGCTATAGCTG#(((((((((((((((((......#.))))))))))))))...))).	2244	2279	1.0	-21.6	1	0.0001317142	0.632	0.12654286500000003	0.14595865999999996	-3.937574446201665	17	22	14	3UTR	MIRT498971	0	0
hsa-miR-107	NM_181780	BTLA	AGCAGCATTGTACAGGGCTATCA#GATAGGAATGTGACATAATGCTGCTG#((((((((((((((...(((((.#)))))...)))...))))))))))).	1720	1746	1.0	-23.7	1	0.001618892	0.662	0.0	0.0	-4.906073086755913	19	26	11	3UTR	MIRT629119	1	1
hsa-miR-107	NM_194442	LBR	AGCAGCATTGTACAGGGCTATCA#TGGTAATGAAAAGAGCCCTTTATCAATACAGTGCTGCA#.(((((((((((.((((((....#.)))))).......))))))))))).	3629	3667	1.0	-26.2	1	0.001559519	0.632	-0.006558436363636366	-0.1330104796052631	-5.08245545002336	17	26	11	3UTR	MIRT566960	0	0
hsa-miR-107	NM_198882	SYNRG	AGCAGCATTGTACAGGGCTATCA#TGGTCTTGTCTATATAATTGCTGCTT#((((((((((((((((((((...#)))))))))....))))).)))))).	5121	5147	1.0	-20.9	1	0.2588503	0.676	0.0	0.0	-3.937574446201665	20	26	9	3UTR	MIRT725127	0	0
hsa-miR-107	NM_199076	CNNM2	AGCAGCATTGTACAGGGCTATCA#TAGCCCAGTGAAATGCTGTC#.((((((((.(((.((((((...#)))))).))).)))))))).	9985	10005	1.0	-24.2	1	0.004676746	0.559	0.0	0.0	-5.892671223205703	17	20	8	3UTR	MIRT055242	1	1
hsa-miR-107	NM_001377237	PLEKHA1	AGCAGCATTGTACAGGGCTATCA#ATGGTCTTGTTGATGCTGCTC#((((((((((.((((((((((..#)))))))))))))))))))).	5712	5733	1.0	-25.1	1	0.004260644	0.574	0.0	0.0	-6.7623489216120145	20	21	20	3UTR	MIRT055814	1	1
hsa-miR-107	NM_001395679	DICER1	AGCAGCATTGTACAGGGCTATCA#TGATGCTTCGTGGAATGCTGCA#.((((((((.(((.((((.((((#)))))))).))).)))))))).	7901	7923	1.0	-24.5	1	0.0003095125	0.632	0.0	0.0	-5.892671223205703	19	22	8	3UTR	MIRT005348	1	1
hsa-miR-107	NM_001395682	DICER1	AGCAGCATTGTACAGGGCTATCA#TGATGCTTCGTGGAATGCTGCA#.((((((((.(((.((((.((((#)))))))).))).)))))))).	8044	8066	1.0	-24.5	1	0.0003095125	0.632	0.0	0.0	-5.892671223205703	19	22	8	3UTR	MIRT005348	1	1
hsa-miR-107	NM_001395685	DICER1	AGCAGCATTGTACAGGGCTATCA#TGATGCTTCGTGGAATGCTGCA#.((((((((.(((.((((.((((#)))))))).))).)))))))).	7827	7849	1.0	-24.5	1	0.0003095125	0.632	0.0	0.0	-5.892671223205703	19	22	8	3UTR	MIRT005348	1	1
hsa-miR-107	NM_001395689	DICER1	AGCAGCATTGTACAGGGCTATCA#TGATGCTTCGTGGAATGCTGCA#.((((((((.(((.((((.((((#)))))))).))).)))))))).	7603	7625	1.0	-24.5	1	0.0003095125	0.632	0.0	0.0	-5.892671223205703	19	22	8	3UTR	MIRT005348	1	1
hsa-miR-107	NM_001400004	G3BP2	AGCAGCATTGTACAGGGCTATCA#TGGTAATTTTGTACAGTATAGTGTATGAATTGCTGTGCTGCA#.((((((((((((((((.(((((#))))).)))))))))...................))))))).	2560	2602	1.0	-20.7	1	1.878987e-06	0.662	0.0	0.0	-3.793324837357118	21	42	9	3UTR	MIRT507187	1	1
hsa-miR-107	NM_001400005	G3BP2	AGCAGCATTGTACAGGGCTATCA#TGGTAATTTTGTACAGTATAGTGTATGAATTGCTGTGCTGCA#.((((((((((((((((.(((((#))))).)))))))))...................))))))).	2681	2723	1.0	-20.7	1	1.878987e-06	0.662	0.0	0.0	-3.793324837357118	21	42	9	3UTR	MIRT507187	1	1
hsa-miR-107	NM_001400006	G3BP2	AGCAGCATTGTACAGGGCTATCA#TGGTAATTTTGTACAGTATAGTGTATGAATTGCTGTGCTGCA#.((((((((((((((((.(((((#))))).)))))))))...................))))))).	2813	2855	1.0	-20.7	1	1.878987e-06	0.662	0.0	0.0	-3.793324837357118	21	42	9	3UTR	MIRT507187	1	1
hsa-miR-107	NM_001400007	G3BP2	AGCAGCATTGTACAGGGCTATCA#TGGTAATTTTGTACAGTATAGTGTATGAATTGCTGTGCTGCA#.((((((((((((((((.(((((#))))).)))))))))...................))))))).	2692	2734	1.0	-20.7	1	1.878987e-06	0.662	0.0	0.0	-3.793324837357118	21	42	9	3UTR	MIRT507187	1	1
hsa-miR-107	NM_001400008	G3BP2	AGCAGCATTGTACAGGGCTATCA#TGGTAATTTTGTACAGTATAGTGTATGAATTGCTGTGCTGCA#.((((((((((((((((.(((((#))))).)))))))))...................))))))).	2543	2585	1.0	-20.7	1	1.878987e-06	0.662	0.0	0.0	-3.793324837357118	21	42	9	3UTR	MIRT507187	1	1
hsa-miR-107	NM_001400010	G3BP2	AGCAGCATTGTACAGGGCTATCA#TGGTAATTTTGTACAGTATAGTGTATGAATTGCTGTGCTGCA#.((((((((((((((((.(((((#))))).)))))))))...................))))))).	2480	2522	1.0	-20.7	1	1.878987e-06	0.662	0.0	0.0	-3.793324837357118	21	42	9	3UTR	MIRT507187	1	1
hsa-miR-107	NM_001400011	G3BP2	AGCAGCATTGTACAGGGCTATCA#TGGTAATTTTGTACAGTATAGTGTATGAATTGCTGTGCTGCA#.((((((((((((((((.(((((#))))).)))))))))...................))))))).	2626	2668	1.0	-20.7	1	1.878987e-06	0.662	0.0	0.0	-3.793324837357118	21	42	9	3UTR	MIRT507187	1	1
hsa-miR-107	NM_001400012	G3BP2	AGCAGCATTGTACAGGGCTATCA#TGGTAATTTTGTACAGTATAGTGTATGAATTGCTGTGCTGCA#.((((((((((((((((.(((((#))))).)))))))))...................))))))).	2594	2636	1.0	-20.7	1	1.878987e-06	0.662	0.0	0.0	-3.793324837357118	21	42	9	3UTR	MIRT507187	1	1
hsa-miR-107	NM_001400013	G3BP2	AGCAGCATTGTACAGGGCTATCA#TGGTAATTTTGTACAGTATAGTGTATGAATTGCTGTGCTGCA#.((((((((((((((((.(((((#))))).)))))))))...................))))))).	2714	2756	1.0	-20.7	1	1.878987e-06	0.662	0.0	0.0	-3.793324837357118	21	42	9	3UTR	MIRT507187	1	1
hsa-miR-107	NM_001400014	G3BP2	AGCAGCATTGTACAGGGCTATCA#TGGTAATTTTGTACAGTATAGTGTATGAATTGCTGTGCTGCA#.((((((((((((((((.(((((#))))).)))))))))...................))))))).	2593	2635	1.0	-20.7	1	1.878987e-06	0.662	0.0	0.0	-3.793324837357118	21	42	9	3UTR	MIRT507187	1	1
hsa-miR-107	NM_001400015	G3BP2	AGCAGCATTGTACAGGGCTATCA#TGGTAATTTTGTACAGTATAGTGTATGAATTGCTGTGCTGCA#.((((((((((((((((.(((((#))))).)))))))))...................))))))).	2381	2423	1.0	-20.7	1	1.878987e-06	0.662	0.0	0.0	-3.793324837357118	21	42	9	3UTR	MIRT507187	1	1
hsa-miR-107	NM_001400016	G3BP2	AGCAGCATTGTACAGGGCTATCA#TGGTAATTTTGTACAGTATAGTGTATGAATTGCTGTGCTGCA#.((((((((((((((((.(((((#))))).)))))))))...................))))))).	2582	2624	1.0	-20.7	1	1.878987e-06	0.662	0.0	0.0	-3.793324837357118	21	42	9	3UTR	MIRT507187	1	1
hsa-miR-107	NM_001400017	G3BP2	AGCAGCATTGTACAGGGCTATCA#TGGTAATTTTGTACAGTATAGTGTATGAATTGCTGTGCTGCA#.((((((((((((((((.(((((#))))).)))))))))...................))))))).	2461	2503	1.0	-20.7	1	1.878987e-06	0.662	0.0	0.0	-3.793324837357118	21	42	9	3UTR	MIRT507187	1	1
hsa-miR-107	NM_001400018	G3BP2	AGCAGCATTGTACAGGGCTATCA#TGGTAATTTTGTACAGTATAGTGTATGAATTGCTGTGCTGCA#.((((((((((((((((.(((((#))))).)))))))))...................))))))).	2444	2486	1.0	-20.7	1	1.878987e-06	0.662	0.0	0.0	-3.793324837357118	21	42	9	3UTR	MIRT507187	1	1
hsa-miR-107	NM_001400019	G3BP2	AGCAGCATTGTACAGGGCTATCA#TGGTAATTTTGTACAGTATAGTGTATGAATTGCTGTGCTGCA#.((((((((((((((((.(((((#))))).)))))))))...................))))))).	2438	2480	1.0	-20.7	1	1.878987e-06	0.662	0.0	0.0	-3.793324837357118	21	42	9	3UTR	MIRT507187	1	1
hsa-miR-107	NM_001400021	G3BP2	AGCAGCATTGTACAGGGCTATCA#TGGTAATTTTGTACAGTATAGTGTATGAATTGCTGTGCTGCA#.((((((((((((((((.(((((#))))).)))))))))...................))))))).	2483	2525	1.0	-20.7	1	1.878987e-06	0.662	0.0	0.0	-3.793324837357118	21	42	9	3UTR	MIRT507187	1	1
hsa-miR-107	NM_001400022	G3BP2	AGCAGCATTGTACAGGGCTATCA#TGGTAATTTTGTACAGTATAGTGTATGAATTGCTGTGCTGCA#.((((((((((((((((.(((((#))))).)))))))))...................))))))).	2384	2426	1.0	-20.7	1	1.878987e-06	0.662	0.0	0.0	-3.793324837357118	21	42	9	3UTR	MIRT507187	1	1
hsa-miR-107	NM_014789	ZNF623	AGCAGCATTGTACAGGGCTATCA#GATTCTGTTAGAAGTATCTTCTCAGCCCTGCTACTGTCTGCTGCTC#(((((((..((((((((((....#.))))))).)))....))))))).	2708	2754	1.0	-25.9	1	0.001383845	0.544	-0.03203197272727274	-0.30181583125	-7.307599033628058	17	24	7	3UTR	MIRT735849	0	0
hsa-miR-107	NM_014912	CPEB3	AGCAGCATTGTACAGGGCTATCA#TGATGTCCTTGTACTGTCTTAAGTTAGTGTTGCTT#(((((((((((((((((.(((((#))))).))))))))...........))))))))).	4078	4113	1.0	-23.5	1	0.02641107	0.632	1.8116105714285713	2.6854691875000003	-3.937574446201665	22	35	9	3UTR	MIRT567974	1	1
hsa-miR-107	NM_014912	CPEB3	AGCAGCATTGTACAGGGCTATCA#GATGGCCTGGGCAGAGTTGG#..((((.((((...((((((((.#))))))))..)))).)))).	3764	3784	1.0	-21.8	0	9.652991e-05	0.618	3.8271349999999997	2.2755800537499997	-11.993461094026614	16	20	8	3UTR	MIRT567974	1	1
hsa-miR-107	NM_014924	ATG14	AGCAGCATTGTACAGGGCTATCA#TGGGTCAGTGTGCTGGTCCTTGCGGTGCTGA#..((((((((((.(((((((.((#.)).))))))))))))))))).	1824	1855	1.0	-23.9	1	7.315976e-05	0.515	0.21320457999999998	0.561880885	-6.246131332038532	19	22	17	3UTR	MIRT559393	0	1
hsa-miR-107	NM_015491	PNISR	AGCAGCATTGTACAGGGCTATCA#GGTGTACTTTTTCCAATGCTGCTC#((((((((((...(((..((((.#))))..)))....)))))))))).	2935	2959	1.0	-18.7	1	0.02224363	0.706	3.4133489	3.2189791624999997	-11.398282843874613	17	24	10	3UTR	MIRT547071	1	0
hsa-miR-107	NM_016289	CAB39	AGCAGCATTGTACAGGGCTATCA#TGGCTTTGTGGTGTAGTGCTGTG#.(((((((((((((((((((...#))))))))))...))))))))).	3287	3310	1.0	-22.0	1	0.007906164	0.544	-0.09726225	-0.03362613624999996	-3.793324837357118	19	23	10	3UTR	MIRT205548	1	1
hsa-miR-107	NM_016319	COPS7A	AGCAGCATTGTACAGGGCTATCA#TGGCCCTTGGGTCCTGGGAATGCTGCTG#(((((((((...(((((((....#.)))))))..))))))))).	1538	1566	1.0	-26.1	1	3.427755e-06	0.426	1.3488193777777777	0.27003321875	-11.35165869953655	16	20	9	3UTR	MIRT048306	0	0
hsa-miR-107	NM_016497	MRPL51	AGCAGCATTGTACAGGGCTATCA#TGATAGCCACATACTTTTGTTTTCCTCTAGATGCTGCC#.(((((((((((...((((((((#))))))))...)))...............)))))))).	636	674	1.0	-23.3	1	0.1340783	0.603	2.0799376069230773	2.5470560548749996	-6.674744927794402	19	38	8	3UTR	MIRT504887	0	0
hsa-miR-107	NM_017482	ADD2	AGCAGCATTGTACAGGGCTATCA#TGGGTGCCGGTGCTCTTGCTGCA#.((((((..((((..(((..(((#)))..))).))))...)))))).	2177	2200	1.0	-21.5	1	0.0006711898	0.397	5.675465166666668	4.20450937	-8.755638902554553	16	23	6	3UTR	MIRT048288	0	0
hsa-miR-107	NM_017548	CDV3	AGCAGCATTGTACAGGGCTATCA#GCATCTGGGCAATGTTGA#..(((((((((.((((((.....#)).)))).))))))))).	2843	2861	1.0	-18.5	1	0.01169585	0.397	0.6146925777777779	0.31796681425	-8.303804028968646	15	18	9	3UTR	MIRT558793	1	0
hsa-miR-107	NM_001198634	RUNX1T1	AGCAGCATTGTACAGGGCTATCA#CCCTGTGAATGCTGTTA#(((((((((.(((((((......#)))))))))))))))).	6269	6286	1.0	-22.8	1	0.02205914	0.632	0.0	0.0	-5.180080914529843	16	17	16	3UTR	MIRT546624	1	1
hsa-miR-107	NM_001198854	CYP2C8	AGCAGCATTGTACAGGGCTATCA#CTTGTATTAATTGCTGCA#.((((((..(((((((.......#)))))))....)))))).	1644	1662	1.0	-18.1	1	0.0007167649	0.721	1.0454731428571429	0.9734603750000002	-7.163349424783512	13	18	7	3UTR	MIRT006956	0	0
hsa-miR-107	NM_001199671	CALU	AGCAGCATTGTACAGGGCTATCA#AGCCTTGCACAATGCTT#...((((((((.(((((((....#))))))).)))))))).	5421	5438	1.0	-22.5	0	0.0016439	0.559	-0.328409425	-0.4405395512500001	-9.861343503275094	15	17	8	3UTR	MIRT102436	1	1
hsa-miR-107	NM_001199672	CALU	AGCAGCATTGTACAGGGCTATCA#AGCCTTGCACAATGCTT#...((((((((.(((((((....#))))))).)))))))).	5421	5438	1.0	-22.5	0	0.0016439	0.559	-0.328409425	-0.4405395512500001	-9.861343503275094	15	17	8	3UTR	MIRT102436	1	1
hsa-miR-107	NM_001199673	CALU	AGCAGCATTGTACAGGGCTATCA#AGCCTTGCACAATGCTT#...((((((((.(((((((....#))))))).)))))))).	4406	4423	1.0	-22.5	0	0.0016439	0.559	-0.328409425	-0.4405395512500001	-9.861343503275094	15	17	8	3UTR	MIRT102436	1	1
hsa-miR-107	NM_001219	CALU	AGCAGCATTGTACAGGGCTATCA#AGCCTTGCACAATGCTT#...((((((((.(((((((....#))))))).)))))))).	4606	4623	1.0	-22.5	0	0.0016439	0.559	-0.328409425	-0.4405395512500001	-9.861343503275094	15	17	8	3UTR	MIRT102436	1	1
hsa-miR-107	NM_001238	CCNE1	AGCAGCATTGTACAGGGCTATCA#GTTTTGTAAGTGCTGCTA#(((((((((.((((((((.....#))))))))))))))))).	1893	1911	1.0	-21.3	1	0.0421448	0.721	4.230239999999999	2.115999059464286	-5.180080914529843	17	18	17	3UTR	MIRT004693	1	0
hsa-miR-107	NM_001240	CCNT1	AGCAGCATTGTACAGGGCTATCA#GGAGTTGTACTTATGCTGCTA#((((((((.((((((..((....#))..))))))..)))))))).	3930	3951	1.0	-19.9	1	0.01476179	0.544	0.920171155	1.0296679565000002	-5.227013184751041	16	21	8	3UTR	MIRT564315	0	1
hsa-miR-107	NM_001242466	PIK3R1	AGCAGCATTGTACAGGGCTATCA#GCCCAGGATGCTGCTA#(((((((((.(...((((.....#))))).))))))))).	5036	5052	1.0	-21.9	1	0.0006256051	0.662	4.828453333333333	1.02473237375	-10.67285475431285	14	16	9	3UTR	MIRT314098	1	1
hsa-miR-107	NM_001242466	PIK3R1	AGCAGCATTGTACAGGGCTATCA#AGTCCAACAATGTTGTTT#(((((((((((...(((((....#))))).))))))))))).	2489	2507	1.0	-18.8	1	0.0001535361	0.647	2.579101272727273	2.1638509249999998	-9.430348285984671	16	18	11	3UTR	MIRT314098	1	1
hsa-miR-107	NM_001261843	ZNF623	AGCAGCATTGTACAGGGCTATCA#GATTCTGTTAGAAGTATCTTCTCAGCCCTGCTACTGTCTGCTGCTC#(((((((..((((((((((....#.))))))).)))....))))))).	2721	2767	1.0	-25.9	1	0.001383845	0.544	-0.03203197272727274	-0.30181583125	-7.307599033628058	17	24	7	3UTR	MIRT735849	0	0
hsa-miR-107	NM_001270481	PSMB6	AGCAGCATTGTACAGGGCTATCA#GATGCCCTGTACTGATGCA#....((((((((((((((.(((.#)))))))))))).))))).	798	817	1.0	-26.3	0	0.0004885079	0.667	0.17438404666666665	1.3980997962499997	-9.546562468637928	17	19	12	3UTR	MIRT048307	0	0
hsa-miR-107	NM_001271581	DNAJC10	AGCAGCATTGTACAGGGCTATCA#GTCCTGAATGGTGTTGCC#.((((((((((.((((((.....#)))))).)))))))))).	7572	7590	1.0	-22.1	1	0.0006715576	0.588	0.0	0.0	-7.140128146953473	16	18	10	3UTR	MIRT552026	0	0
hsa-miR-107	NM_001277842	CCNT1	AGCAGCATTGTACAGGGCTATCA#GGAGTTGTACTTATGCTGCTA#((((((((.((((((..((....#))..))))))..)))))))).	3766	3787	1.0	-19.9	1	0.01476179	0.544	0.143596275	0.9124053612500003	-5.227013184751041	16	21	8	3UTR	MIRT564315	0	1
hsa-miR-107	NM_001282763	CDV3	AGCAGCATTGTACAGGGCTATCA#GCATCTGGGCAATGTTGA#..(((((((((.((((((.....#)).)))).))))))))).	2362	2380	1.0	-18.5	1	0.01169585	0.397	0.6146925777777779	0.31796681425	-8.303804028968646	15	18	9	3UTR	MIRT558793	1	0
hsa-miR-107	NM_001282764	CDV3	AGCAGCATTGTACAGGGCTATCA#GCATCTGGGCAATGTTGA#..(((((((((.((((((.....#)).)))).))))))))).	2110	2128	1.0	-18.5	1	0.01169585	0.397	0.6146925777777779	0.31796681425	-8.303804028968646	15	18	9	3UTR	MIRT558793	1	0
hsa-miR-107	NM_001282765	CDV3	AGCAGCATTGTACAGGGCTATCA#GCATCTGGGCAATGTTGA#..(((((((((.((((((.....#)).)))).))))))))).	3295	3313	1.0	-18.5	1	0.01169585	0.397	0.6146925777777779	0.31796681425	-8.303804028968646	15	18	9	3UTR	MIRT558793	1	0
hsa-miR-107	NM_001284256	GUCD1	AGCAGCATTGTACAGGGCTATCA#GGTGGCCCAGGAGTACCCATGCACAGCAGCTGTGGGGTGTGGGCA#.((.(((((.((((((((((((.#))))))))......................)))).)))))..)).	2561	2606	1.0	-22.8	0	2.322113e-06	0.471	4.099939905882353	2.3158507575	-8.067853580644487	19	45	8	3UTR	MIRT026969	0	0
hsa-miR-107	NM_018841	GNG12	AGCAGCATTGTACAGGGCTATCA#TAGCCTTGTGTCATCTGCTT#(((((...((((((((((((...#)))))))))).)).))))).	2191	2211	1.0	-21.2	0	0.02467798	0.515	0.11008634615384615	0.09616577624999996	-9.695854671446662	17	20	10	3UTR	MIRT567439	0	0
hsa-miR-107	NM_018981	DNAJC10	AGCAGCATTGTACAGGGCTATCA#GTCCTGAATGGTGTTGCC#.((((((((((.((((((.....#)))))).)))))))))).	7710	7728	1.0	-22.1	1	0.0006715576	0.588	0.03816400000000001	0.15469572499999995	-7.140128146953473	16	18	10	3UTR	MIRT552026	0	0
hsa-miR-107	NM_019063	EML4	AGCAGCATTGTACAGGGCTATCA#GCCAAGTGCAATGGTGTTG#((((.((((((((..(((.....#)))..)))))))).)))).	3731	3750	1.0	-22.3	0	0.000165301	0.662	1.030305625	0.64666174375	-9.648901098785178	15	19	8	3UTR	MIRT548416	0	0
hsa-miR-107	NM_020205	OTUD7B	AGCAGCATTGTACAGGGCTATCA#GATGGTGTTAAACTCAGTGCTGTA#.(((((((((...((.((((((.#)))))).)).....))))))))).	6437	6461	1.0	-21.2	1	0.05253259	0.529	1.6658967777777778	1.92105111225	-11.48708231533368	17	24	9	3UTR	MIRT555889	0	1
hsa-miR-107	NM_020846	SLAIN2	AGCAGCATTGTACAGGGCTATCA#GATGGCCTTTGCTATTGAAGCCAACTTCTTCACATGCTGTTA#((((((((.(((.(((((((((.#)))))))))))).....................)))))))).	2752	2794	1.0	-21.2	1	0.05527695	0.618	3.005103222222222	1.7518574075000002	-6.283094717113671	20	42	12	3UTR	MIRT093984	1	1
hsa-miR-107	NM_022731	NUCKS1	AGCAGCATTGTACAGGGCTATCA#TGATAAGAAGTACATCCCTGTGATCCTGCTGCTT#(((((((...(((((((......#.)))))))....))))))).	2090	2124	1.0	-21.9	1	0.0006295622	0.485	-0.053173599999999994	-0.08696927000000004	-8.550105501956237	14	20	7	3UTR	MIRT269721	0	0
hsa-miR-107	NM_024523	GCC1	AGCAGCATTGTACAGGGCTATCA#GGCTCTGGTTTCTGCTGCC#.((((((.....(((((((....#))))))).....)))))).	2797	2816	1.0	-21.3	1	0.001829773	0.574	3.208286142857143	2.5786602625000006	-14.577433678118396	13	19	7	3UTR	MIRT657916	0	1
hsa-miR-107	NM_024524	ATP13A3	AGCAGCATTGTACAGGGCTATCA#TAGCACCAACTGCTGTAAAGCAATGCTGCA#.(((((((((((((((((((...#)))).))......)))...)))))))))).	6763	6793	1.0	-22.0	1	0.0006577996	0.588	5.31086547586207	3.12812600125	-3.793324837357118	19	30	10	3UTR	MIRT559382	1	1
hsa-miR-107	NM_030797	CYRIA	AGCAGCATTGTACAGGGCTATCA#AGCCCTGTAAGGTTAATGCC#....(((((((((((((((....#)))))))))....)))))).	2379	2399	1.0	-20.8	0	0.001135056	0.588	-0.1468838894736842	-0.05730666374999996	-9.546562468637928	15	20	9	3UTR	MIRT675964	1	0
hsa-miR-107	NM_030981	RAB1B	AGCAGCATTGTACAGGGCTATCA#GGTGGGCGGGTAGCAGTGCTGG#..(((((((((((..(.(((((.#))))).)..))).)))))))).	1257	1279	1.0	-23.0	1	2.284159e-06	0.382	0.10573166166666664	0.13714860912500001	-6.549290197143331	17	22	8	3UTR	MIRT004695	1	1
hsa-miR-107	NM_031243	HNRNPA2B1	AGCAGCATTGTACAGGGCTATCA#GGTCCGTTGCAAAGCTGTTG#((((((.(((((..(((((....#)))))..))))).)))))).	1804	1824	1.0	-20.3	0	0.005858556	0.647	2.836503333333333	3.3308728375000003	-7.627231511259633	16	20	6	3UTR	MIRT562206	1	0
hsa-miR-107	NM_001144884	SLC30A7	AGCAGCATTGTACAGGGCTATCA#ATGGTTGTGACAGTGCTGTTT#(((((((((((.((.((((((..#)))))).))))))))))))).	2368	2389	1.0	-22.8	1	0.0001916305	0.574	-0.023103181818181807	0.4817773225000002	-8.019827316048655	19	21	13	3UTR	MIRT178640	0	0
hsa-miR-107	NM_001144884	SLC30A7	AGCAGCATTGTACAGGGCTATCA#GTAGCCCTATGAGCTGCTC#((((((.((((..((((((((..#)))))))))))))))))).	6809	6828	1.0	-22.0	0	0.0005869411	0.662	-0.12119087500000003	0.17940832999999995	-10.117194903335584	18	19	18	3UTR	MIRT178640	0	0
hsa-miR-107	NM_001145076	EML4	AGCAGCATTGTACAGGGCTATCA#GCCAAGTGCAATGGTGTTG#((((.((((((((..(((.....#)))..)))))))).)))).	3557	3576	1.0	-22.3	0	0.000165301	0.662	1.030305625	0.64666174375	-9.648901098785178	15	19	8	3UTR	MIRT548416	0	0
hsa-miR-107	NM_001145306	CDK6	AGCAGCATTGTACAGGGCTATCA#GGTAAAAAGAGATGCGGTAGCAGCTGCCCTGTGTGAAGCTGTC#.(((((.(((((((((((.....#.))))))))))).))))).	7939	7982	1.0	-23.3	0	9.82085e-05	0.441	0.546401990909091	0.30123901000000003	-5.337011372228436	16	19	11	3UTR	MIRT001233	1	1
hsa-miR-107	NM_001160266	RPAIN	AGCAGCATTGTACAGGGCTATCA#TGAGGAGCCTTGTACATACAAGCC#.((.....(((((((((((.(((#)))..))))))))))).....)).	536	560	1.0	-20.5	0	0.0007972158	0.676	-0.3219208909090909	0.15250407875000005	-16.702664512373776	16	24	11	3UTR	MIRT048299	0	0
hsa-miR-107	NM_001164093	COPS7A	AGCAGCATTGTACAGGGCTATCA#TGGCCCTTGGGTCCTGGGAATGCTGCTG#(((((((((...(((((((....#.)))))))..))))))))).	1758	1786	1.0	-26.1	1	3.427755e-06	0.426	1.3488193777777777	0.27003321875	-11.35165869953655	16	20	9	3UTR	MIRT048306	0	0
hsa-miR-107	NM_001164094	COPS7A	AGCAGCATTGTACAGGGCTATCA#TGGCCCTTGGGTCCTGGGAATGCTGCTG#(((((((((...(((((((....#.)))))))..))))))))).	1565	1593	1.0	-26.1	1	3.427755e-06	0.426	1.3488193777777777	0.27003321875	-11.35165869953655	16	20	9	3UTR	MIRT048306	0	0
hsa-miR-107	NM_001164095	COPS7A	AGCAGCATTGTACAGGGCTATCA#TGGCCCTTGGGTCCTGGGAATGCTGCTG#(((((((((...(((((((....#.)))))))..))))))))).	1636	1664	1.0	-26.1	1	3.427755e-06	0.426	1.3488193777777777	0.27003321875	-11.35165869953655	16	20	9	3UTR	MIRT048306	0	0
hsa-miR-107	NM_001164097	VCAN	AGCAGCATTGTACAGGGCTATCA#TGAATGTTCATGTATGAATGCTGCA#.(((((((((((((((((..(((#)))..)))).))))).)))))))).	8466	8491	1.0	-21.7	1	0.003598341	0.706	1.217939871631579	3.2827736499999993	-3.793324837357118	20	25	8	3UTR	MIRT314709	1	1
hsa-miR-107	NM_001164098	VCAN	AGCAGCATTGTACAGGGCTATCA#TGAATGTTCATGTATGAATGCTGCA#.(((((((((((((((((..(((#)))..)))).))))).)))))))).	6165	6190	1.0	-21.7	1	0.003598341	0.706	1.217939871631579	3.2827736499999993	-3.793324837357118	20	25	8	3UTR	MIRT314709	1	1
hsa-miR-107	NM_001164615	FZD6	AGCAGCATTGTACAGGGCTATCA#TTGTATTATGCTGCTC#((((((((.((((((........#)))))).)))))))).	3062	3078	1.0	-17.8	1	0.1060295	0.676	0.46101561249999995	0.36504417875000006	-5.227013184751041	14	16	8	3UTR	MIRT223688	0	1
hsa-miR-107	NM_001164616	FZD6	AGCAGCATTGTACAGGGCTATCA#TTGTATTATGCTGCTC#((((((((.((((((........#)))))).)))))))).	2968	2984	1.0	-17.8	1	0.1060295	0.676	0.46101561249999995	0.36504417875000006	-5.227013184751041	14	16	8	3UTR	MIRT223688	0	1
hsa-miR-107	NM_001168236	ABL2	AGCAGCATTGTACAGGGCTATCA#GACAATCAGCCTGTGTGGTGCTGCA#.(((((((((((((.((((....#.))))))))))))))))).	7752	7777	1.0	-23.5	1	1.855543e-05	0.485	0.330735	-0.006997977499999988	-4.528774397607753	17	19	17	3UTR	MIRT503231	1	1
hsa-miR-107	NM_001168236	ABL2	AGCAGCATTGTACAGGGCTATCA#GAAAGCTCTTTTAGTGCAGTGTTGTTA#(((((((((((((((((((.((.#)).))))))....))))))))))))).	5562	5589	1.0	-25.6	1	0.01642717	0.632	0.6927264695652176	0.27083976249999997	-3.937574446201665	21	27	13	3UTR	MIRT503231	1	1
hsa-miR-107	NM_001168237	ABL2	AGCAGCATTGTACAGGGCTATCA#GACAATCAGCCTGTGTGGTGCTGCA#.(((((((((((((.((((....#.))))))))))))))))).	7506	7531	1.0	-23.5	1	1.855543e-05	0.485	0.09994152307692308	0.3654844025	-4.528774397607753	17	19	17	3UTR	MIRT503231	1	1
hsa-miR-107	NM_001168237	ABL2	AGCAGCATTGTACAGGGCTATCA#GAAAGCTCTTTTAGTGCAGTGTTGTTA#(((((((((((((((((((.((.#)).))))))....))))))))))))).	5316	5343	1.0	-25.6	1	0.01642717	0.632	0.6814269565217392	0.6176511	-3.937574446201665	21	27	13	3UTR	MIRT503231	1	1
hsa-miR-107	NM_001168238	ABL2	AGCAGCATTGTACAGGGCTATCA#GACAATCAGCCTGTGTGGTGCTGCA#.(((((((((((((.((((....#.))))))))))))))))).	7443	7468	1.0	-23.5	1	1.855543e-05	0.485	0.46186721538461545	0.10636641874999997	-4.528774397607753	17	19	17	3UTR	MIRT503231	1	1
hsa-miR-107	NM_001168238	ABL2	AGCAGCATTGTACAGGGCTATCA#GAAAGCTCTTTTAGTGCAGTGTTGTTA#(((((((((((((((((((.((.#)).))))))....))))))))))))).	5253	5280	1.0	-25.6	1	0.01642717	0.632	0.6503510521739131	0.6671956725	-3.937574446201665	21	27	13	3UTR	MIRT503231	1	1
hsa-miR-107	NM_001168239	ABL2	AGCAGCATTGTACAGGGCTATCA#GACAATCAGCCTGTGTGGTGCTGCA#.(((((((((((((.((((....#.))))))))))))))))).	7150	7175	1.0	-23.5	1	1.855543e-05	0.485	-0.7393082307692308	0.4711771987500001	-4.528774397607753	17	19	17	3UTR	MIRT503231	1	1
hsa-miR-107	NM_001168239	ABL2	AGCAGCATTGTACAGGGCTATCA#GAAAGCTCTTTTAGTGCAGTGTTGTTA#(((((((((((((((((((.((.#)).))))))....))))))))))))).	4960	4987	1.0	-25.6	1	0.01642717	0.632	0.26049293913043475	0.4129756425	-3.937574446201665	21	27	13	3UTR	MIRT503231	1	1
hsa-miR-107	NM_001170765	LCOR	AGCAGCATTGTACAGGGCTATCA#GAAGCAGACATTAGCCCTGTAACACAACACTGTA#.((((..(((((((((((((...#.)))))))))...))))..)))).	6858	6892	1.0	-22.6	0	0.03824733	0.618	0.7484441875000001	0.491500465	-7.2379701334214825	17	24	9	3UTR	MIRT178476	1	1
hsa-miR-107	NM_001170766	LCOR	AGCAGCATTGTACAGGGCTATCA#GAAGCAGACATTAGCCCTGTAACACAACACTGTA#.((((..(((((((((((((...#.)))))))))...))))..)))).	4281	4315	1.0	-22.6	0	0.03824733	0.618	0.7484441875000001	0.491500465	-7.2379701334214825	17	24	9	3UTR	MIRT178476	1	1
hsa-miR-107	NM_001178137	CPEB3	AGCAGCATTGTACAGGGCTATCA#TGATGTCCTTGTACTGTCTTAAGTTAGTGTTGCTT#(((((((((((((((((.(((((#))))).))))))))...........))))))))).	3994	4029	1.0	-23.5	1	0.02641107	0.632	0.849008867857143	2.2391340875	-3.937574446201665	22	35	9	3UTR	MIRT567974	1	1
hsa-miR-107	NM_001178137	CPEB3	AGCAGCATTGTACAGGGCTATCA#GATGGCCTGGGCAGAGTTGG#..((((.((((...((((((((.#))))))))..)))).)))).	3680	3700	1.0	-21.8	0	9.652991e-05	0.618	2.312032875	1.8802866674999996	-11.993461094026614	16	20	8	3UTR	MIRT567974	1	1
hsa-miR-107	NM_001185055	ADD2	AGCAGCATTGTACAGGGCTATCA#TGGGTGCCGGTGCTCTTGCTGCA#.((((((..((((..(((..(((#)))..))).))))...)))))).	2058	2081	1.0	-21.5	1	0.0006711898	0.397	3.0262281333333334	2.821999064999999	-8.755638902554553	16	23	6	3UTR	MIRT048288	0	0
hsa-miR-107	NM_001190879	ORC4	AGCAGCATTGTACAGGGCTATCA#TGATTACAGTAACATTCTGTACAGTGCTATAGCTG#(((((((((((((((((......#.))))))))))))))...))).	2399	2434	1.0	-21.6	1	0.0001317142	0.632	0.21807336999999993	-0.10228063125000002	-3.937574446201665	17	22	14	3UTR	MIRT498971	0	0
hsa-miR-107	NM_001190882	ORC4	AGCAGCATTGTACAGGGCTATCA#TGATTACAGTAACATTCTGTACAGTGCTATAGCTG#(((((((((((((((((......#.))))))))))))))...))).	2171	2206	1.0	-21.6	1	0.0001317142	0.632	0.195884025	0.26453099624999993	-3.937574446201665	17	22	14	3UTR	MIRT498971	0	0
hsa-miR-107	NM_004870	MPDU1	AGCAGCATTGTACAGGGCTATCA#TGAGTGCTTTCGTAAGCCCTGTACATGTA#....(((.(((((((((((....#.)))))))))))))).	978	1007	1.0	-22.9	0	0.0009454472	0.603	-0.9883773272727272	-0.421909215	-11.86019739781856	14	16	14	3UTR	MIRT532193	0	0
hsa-miR-107	NM_005158	ABL2	AGCAGCATTGTACAGGGCTATCA#GACAATCAGCCTGTGTGGTGCTGCA#.(((((((((((((.((((....#.))))))))))))))))).	7522	7547	1.0	-23.5	1	1.855543e-05	0.485	0.5930005692307692	0.24785826374999992	-4.528774397607753	17	19	17	3UTR	MIRT503231	1	1
hsa-miR-107	NM_005158	ABL2	AGCAGCATTGTACAGGGCTATCA#GAAAGCTCTTTTAGTGCAGTGTTGTTA#(((((((((((((((((((.((.#)).))))))....))))))))))))).	5332	5359	1.0	-25.6	1	0.01642717	0.632	0.7012024956521737	0.6663833275	-3.937574446201665	21	27	13	3UTR	MIRT503231	1	1
hsa-miR-107	NM_005582	CD180	AGCAGCATTGTACAGGGCTATCA#TAGTTCTGCCACCATGCCTATGCTGCTG#((((((((.(((((((((((...#))))))))......)))..)))))))).	4336	4364	1.0	-21.0	1	0.007326511	0.5	1.6521049411764706	1.2334057837499999	-4.993964104447428	19	28	8	3UTR	MIRT496006	0	0
hsa-miR-107	NM_005722	ACTR2	AGCAGCATTGTACAGGGCTATCA#GCTCTAATGCTGCTA#(((((((((....(((((.....#)))))))))))))).	1564	1579	1.0	-19.0	1	0.002235018	0.588	1.8785708888888888	2.2269400375	-12.640789312202793	14	15	14	3UTR	MIRT089209	0	1
hsa-miR-107	NM_006482	DYRK2	AGCAGCATTGTACAGGGCTATCA#GCCCAACATAATGCTGTA#.((((((((((...((((.....#))))...)))))))))).	5693	5711	1.0	-21.5	1	0.007746506	0.691	1.72728592	2.1328661175000003	-9.286098677140124	14	18	10	3UTR	MIRT066664	1	1
hsa-miR-107	NM_006496	GNAI3	AGCAGCATTGTACAGGGCTATCA#AGTTTTGTACATGGTGCC#.(((.((.(((((((((((....#))))))))))))).))).	2084	2102	1.0	-19.5	0	0.01148047	0.603	0.972540909090909	1.4552357875	-10.225996941350221	16	18	13	3UTR	MIRT735843	1	0
hsa-miR-107	NM_006591	POLD3	AGCAGCATTGTACAGGGCTATCA#TGATGGATGGTAACAGTGTTGCA#.((((((((((((....((((((#))))))...))).))))))))).	3473	3496	1.0	-21.2	1	0.00295169	0.618	0.41394296923076923	1.0811347125	-5.618663395431772	18	23	9	3UTR	MIRT500135	0	1
hsa-miR-107	NM_007271	STK38	AGCAGCATTGTACAGGGCTATCA#CCTGCAAGTGCTGCC#.((((((((...((((.......#))))..)))))))).	2530	2545	1.0	-18.6	1	0.00122595	0.515	4.92489	5.5896242725	-11.207409090692002	12	15	8	3UTR	MIRT466915	0	0
hsa-miR-107	NM_007314	ABL2	AGCAGCATTGTACAGGGCTATCA#GACAATCAGCCTGTGTGGTGCTGCA#.(((((((((((((.((((....#.))))))))))))))))).	7815	7840	1.0	-23.5	1	1.855543e-05	0.485	-0.015455300000000016	0.4583918075000002	-4.528774397607753	17	19	17	3UTR	MIRT503231	1	1
hsa-miR-107	NM_007314	ABL2	AGCAGCATTGTACAGGGCTATCA#GAAAGCTCTTTTAGTGCAGTGTTGTTA#(((((((((((((((((((.((.#)).))))))....))))))))))))).	5625	5652	1.0	-25.6	1	0.01642717	0.632	0.38479587826086953	0.7524768424999999	-3.937574446201665	21	27	13	3UTR	MIRT503231	1	1
hsa-miR-107	NM_012199	AGO1	AGCAGCATTGTACAGGGCTATCA#CCCTGTCAGATGCTGCTA#(((((((((..((((((......#))))))..))))))))).	12720	12738	1.0	-25.4	1	0.004000498	0.559	0.2592688222222222	0.34447466125000004	-8.004855389940193	15	18	9	3UTR	MIRT026978	1	1
hsa-miR-107	NM_012297	G3BP2	AGCAGCATTGTACAGGGCTATCA#CCTGTTAATGCTGG#..((((((((.(((((.......#))))))))))))).	1966	1980	1.0	-18.5	1	0.001081253	0.647	1.2656827499999999	2.4699618124999994	-7.7817751947826395	13	14	13	3UTR	MIRT507187	1	1
hsa-miR-107	NM_013272	SLCO3A1	AGCAGCATTGTACAGGGCTATCA#GATGGCTCTGAATTCTGTTGTG#.((((((..((.((((((((((.#)))))))))).))..)))))).	4859	4881	1.0	-22.8	1	0.01227538	0.647	0.489553728	0.29622347125000004	-10.510152734379867	18	22	10	3UTR	MIRT282535	0	0
hsa-miR-107	NM_013321	SNX8	AGCAGCATTGTACAGGGCTATCA#TGGCCCTGGCCCTGTGCTGCC#.(((((((.(..((((((((...#))))))))..)..))))))).	4063	4084	1.0	-26.8	1	3.249657e-05	0.353	5.534101875	3.41151773	-11.021292280609586	16	21	8	3UTR	MIRT048293	0	0
hsa-miR-107	NM_013449	BAZ2A	AGCAGCATTGTACAGGGCTATCA#GATAGCTATCCCCTGTATGATGTTGG#..((((((((((((((((((((.#)))))).....)))))))))))))).	6605	6631	1.0	-27.1	1	0.0001747584	0.485	2.369084608	2.3207909282125008	-4.95700071937229	20	26	14	3UTR	MIRT543064	1	1
hsa-miR-107	NM_014117	C16orf72	AGCAGCATTGTACAGGGCTATCA#GGTTTCCCTGTGCTAGCTGA#..((((...((((((((..(((.#)))..))))))))..)))).	3584	3604	1.0	-22.5	0	0.001132263	0.574	0.8045182875	0.5158971162499999	-9.870711841670003	15	20	8	3UTR	MIRT075894	1	1
hsa-miR-107	NM_001412	EIF1AX	AGCAGCATTGTACAGGGCTATCA#TGGACTTTGTCCTCTCTTATTCCCCCCTCCTAGCCCTGCAAGTTGCTA#((((((.(((..((((((((...#.))))))))))))))))).	3665	3713	1.0	-23.2	0	0.0004281257	0.456	0.0	0.0	-11.65283876607969	17	19	17	3UTR	MIRT548457	1	0
hsa-miR-107	NM_001791	CDC42	AGCAGCATTGTACAGGGCTATCA#TGGTACCCTTGTGCAGTGCA#....(((((((((((((.(((((#))))).))))))))))))).	6038	6058	1.0	-25.4	0	4.745459e-06	0.559	0.0	0.0	-9.546562468637928	18	20	13	3UTR	MIRT734260	0	0
hsa-miR-107	NM_001791	CDC42	AGCAGCATTGTACAGGGCTATCA#TGGTAGCAGAGCTGGGCGTGAAACCTGCATTCCTGGCCTCTCCTTTTGTGGTGCTTACAGTGCTGTG#.(((((((((((.((.(((((..#.))))).))))))))))))).	6304	6371	1.0	-23.3	1	0.0008054085	0.559	0.0	0.0	-5.315504530326973	18	21	13	3UTR	MIRT734260	0	0
hsa-miR-107	NM_001895	CSNK2A1	AGCAGCATTGTACAGGGCTATCA#GATAGAAACTGAAACAATGCTGTG#.((((((((((.(((..(((((.#)))))...)))..)))))))))).	7776	7800	1.0	-22.8	1	0.015239	0.515	0.0	0.0	-7.373177227257086	18	24	10	3UTR	MIRT513959	0	0
hsa-miR-107	NM_001973	ELK4	AGCAGCATTGTACAGGGCTATCA#TGATAGCCTGCCAGAAAATAGCAATTTCTAAGGTGCTGCC#.((((((((.....(((((((((#)))))))))......................)))))))).	7051	7091	1.0	-23.2	1	0.001330022	0.618	0.0	0.0	-13.353379620878652	17	40	9	3UTR	MIRT507434	1	1
hsa-miR-107	NM_002006	FGF2	AGCAGCATTGTACAGGGCTATCA#AGTCCTGTGTAAACTGCTGG#..(((((((((((((((((....#))))))))))))..))))).	1456	1476	1.0	-20.8	1	0.0002690638	0.632	0.0	0.0	-4.95700071937229	17	20	12	3UTR	MIRT211265	1	1
hsa-miR-107	NM_002296	LBR	AGCAGCATTGTACAGGGCTATCA#TGGTAATGAAAAGAGCCCTTTATCAATACAGTGCTGCA#.(((((((((((.((((((....#.)))))).......))))))))))).	3598	3636	1.0	-26.2	1	0.001559519	0.632	0.0	0.0	-5.08245545002336	17	26	11	3UTR	MIRT566960	0	0
hsa-miR-107	NM_002572	PAFAH1B2	AGCAGCATTGTACAGGGCTATCA#TGGTGTTCTGTGCTATAGATTCTGTGTATTGCTGTTC#(((((((..(((((((((.((((#)))))))))))))................))))))).	1719	1756	1.0	-19.9	1	0.006311314	0.603	2.6148095555555555	2.2579583587499994	-7.307599033628058	20	37	13	3UTR	MIRT179010	1	1
hsa-miR-107	NM_002572	PAFAH1B2	AGCAGCATTGTACAGGGCTATCA#TAGCCTTTTGTTTTTATGTTGCTT#((((((((...(((((((((...#))))))..)))....)))))))).	1266	1290	1.0	-19.3	1	0.07937136	0.779	1.2812572999999998	0.2916809212499999	-9.06124504818596	17	24	8	3UTR	MIRT179010	1	1
hsa-miR-107	NM_003026	SH3GL2	AGCAGCATTGTACAGGGCTATCA#GATAGTTACGGTTAACCACTGCTTTGGCAATGCTGCTT#(((((((((((.((((((.....#.))))))))))))))))).	1272	1310	1.0	-24.9	1	0.0006034268	0.515	0.0	0.0	-7.284377755798021	17	19	17	3UTR	MIRT731527	1	0
hsa-miR-107	NM_003087	SNCG	AGCAGCATTGTACAGGGCTATCA#CCTGTGCTGCTGCA#.((((((..(((((((.......#))))))))))))).	629	643	1.0	-21.7	1	0.0005408323	0.309	1.8002380000000002	1.08523961625	-7.163349424783512	13	14	13	3UTR	MIRT054598	1	1
hsa-miR-107	NM_003258	TK1	AGCAGCATTGTACAGGGCTATCA#GCCCTGCATGCTGCC#.((((((.((..((((((.....#)))))))))))))).	817	832	1.0	-22.0	1	0.0004540737	0.309	0.0	0.0	-12.278537551544455	14	15	14	3UTR	MIRT695293	0	0
hsa-miR-107	NM_003506	FZD6	AGCAGCATTGTACAGGGCTATCA#TTGTATTATGCTGCTC#((((((((.((((((........#)))))).)))))))).	3083	3099	1.0	-17.8	1	0.1060295	0.676	0.0	0.0	-5.227013184751041	14	16	8	3UTR	MIRT223688	0	1
hsa-miR-107	NM_003583	DYRK2	AGCAGCATTGTACAGGGCTATCA#GCCCAACATAATGCTGTA#.((((((((((...((((.....#))))...)))))))))).	5544	5562	1.0	-21.5	1	0.007746506	0.691	0.0	0.0	-9.286098677140124	14	18	10	3UTR	MIRT066664	1	1
hsa-miR-107	NM_003583	DYRK2	AGCAGCATTGTACAGGGCTATCA#TTCTGTGAGATGCTGCTG#(((((((((.(((((((......#))))))).))))))))).	5805	5823	1.0	-21.2	1	0.02650639	0.691	0.0	0.0	-5.180080914529843	16	18	9	3UTR	MIRT066664	1	1
hsa-miR-107	NM_003601	SMARCA5	AGCAGCATTGTACAGGGCTATCA#GATGTACTGTACAATGCTCA#.(.((((((((((((.((.(((.#))))).))))))))))))).	3447	3467	1.0	-22.4	0	0.00260791	0.676	0.0	0.0	-5.583913391967179	18	20	13	3UTR	MIRT571627	0	0
hsa-miR-107	NM_004349	RUNX1T1	AGCAGCATTGTACAGGGCTATCA#CCCTGTGAATGCTGTTA#(((((((((.(((((((......#)))))))))))))))).	6226	6243	1.0	-22.8	1	0.02205914	0.632	0.0	0.0	-5.180080914529843	16	17	16	3UTR	MIRT546624	1	1
hsa-miR-107	NM_203504	G3BP2	AGCAGCATTGTACAGGGCTATCA#CCTGTTAATGCTGG#..((((((((.(((((.......#))))))))))))).	1932	1946	1.0	-18.5	1	0.001081253	0.647	1.8441576249999998	2.4342016212500006	-7.7817751947826395	13	14	13	3UTR	MIRT507187	1	1
hsa-miR-107	NM_203505	G3BP2	AGCAGCATTGTACAGGGCTATCA#TGGTAATTTTGTACAGTATAGTGTATGAATTGCTGTGCTGCA#.((((((((((((((((.(((((#))))).)))))))))...................))))))).	2602	2644	1.0	-20.7	1	1.878987e-06	0.662	2.1665619999999994	4.3011722625	-3.793324837357118	21	42	9	3UTR	MIRT507187	1	1
hsa-miR-107	NM_203505	G3BP2	AGCAGCATTGTACAGGGCTATCA#CCTGTTAATGCTGG#..((((((((.(((((.......#))))))))))))).	2031	2045	1.0	-18.5	1	0.001081253	0.647	4.4420361250000004	2.9485173875	-7.7817751947826395	13	14	13	3UTR	MIRT507187	1	1
hsa-miR-107	XM_005248542	PIK3R1	AGCAGCATTGTACAGGGCTATCA#GCCCAGGATGCTGCTA#(((((((((.(...((((.....#))))).))))))))).	6486	6502	1.0	-21.9	1	0.0006256051	0.662	0.0	0.0	-10.67285475431285	14	16	9	3UTR	MIRT314098	1	1
hsa-miR-107	XM_005264267	EML4	AGCAGCATTGTACAGGGCTATCA#GGTTGCCATGTACAATGA#.....(((((((((.(((.(((.#))).))).))))))))).	5264	5282	1.0	-20.1	0	0.002372443	0.574	0.0	0.0	-14.401049203701035	15	18	9	3UTR	MIRT548416	0	0
hsa-miR-107	XM_005274460	FAM9C	AGCAGCATTGTACAGGGCTATCA#TCCTGTCAATGTTAATGCTA#((((((((((.((((((......#))))))))))))...)))).	1320	1340	1.0	-18.0	1	0.02123026	0.603	0.0	0.0	-6.7623489216120145	16	20	12	3UTR	MIRT642769	0	0
hsa-miR-107	XM_006721246	SIAH1	AGCAGCATTGTACAGGGCTATCA#TGTGAGTCAATACATAGTGCTGCTG#(((((((((((....((((..((#))..)))).....))))))))))).	1472	1497	1.0	-20.3	1	0.0007456652	0.632	0.0	0.0	-10.165797846235305	17	25	11	3UTR	MIRT735183	0	0
hsa-miR-107	XM_006721598	MPDU1	AGCAGCATTGTACAGGGCTATCA#TGAGTGCTTTCGTAAGCCCTGTACATGTA#....(((.(((((((((((....#.)))))))))))))).	1326	1355	1.0	-22.9	0	0.0009454472	0.603	0.0	0.0	-11.86019739781856	14	16	14	3UTR	MIRT532193	0	0
hsa-miR-107	XM_011536563	ATG14	AGCAGCATTGTACAGGGCTATCA#TGGGTCAGTGTGCTGGTCCTTGCGGTGCTGA#..((((((((((.(((((((.((#.)).))))))))))))))))).	1557	1588	1.0	-23.9	1	7.315976e-05	0.515	0.0	0.0	-6.246131332038532	19	22	17	3UTR	MIRT559393	0	1
hsa-miR-107	XM_017009585	PIK3R1	AGCAGCATTGTACAGGGCTATCA#GCCCAGGATGCTGCTA#(((((((((.(...((((.....#))))).))))))))).	7311	7327	1.0	-21.9	1	0.0006256051	0.662	0.0	0.0	-10.67285475431285	14	16	9	3UTR	MIRT314098	1	1
hsa-miR-107	NM_001082480	ZNF623	AGCAGCATTGTACAGGGCTATCA#GATTCTGTTAGAAGTATCTTCTCAGCCCTGCTACTGTCTGCTGCTC#(((((((..((((((((((....#.))))))).)))....))))))).	2848	2894	1.0	-25.9	1	0.001383845	0.544	-0.03203197272727274	-0.30181583125	-7.307599033628058	17	24	7	3UTR	MIRT735849	0	0
hsa-miR-107	NM_001085357	BTLA	AGCAGCATTGTACAGGGCTATCA#GATAGGAATGTGACATAATGCTGCTG#((((((((((((((...(((((.#)))))...)))...))))))))))).	1576	1602	1.0	-23.7	1	0.001618892	0.662	0.17079729470588226	0.21499789387500004	-4.906073086755913	19	26	11	3UTR	MIRT629119	1	1
hsa-miR-107	NM_001123355	PPP6C	AGCAGCATTGTACAGGGCTATCA#GGTGGCTAAGACATTTGCTGCA#.((((((.(((....(((((((.#)))))))...)))..)))))).	2766	2788	1.0	-22.5	1	0.005108616	0.588	2.4254849999999997	1.6551764150000001	-12.335183166571388	16	22	7	3UTR	MIRT546990	1	1
hsa-miR-107	NM_001123369	PPP6C	AGCAGCATTGTACAGGGCTATCA#GGTGGCTAAGACATTTGCTGCA#.((((((.(((....(((((((.#)))))))...)))..)))))).	2589	2611	1.0	-22.5	1	0.005108616	0.588	3.3553908571428575	2.2020002499999998	-12.335183166571388	16	22	7	3UTR	MIRT546990	1	1
hsa-miR-107	NM_001130022	ZNF680	AGCAGCATTGTACAGGGCTATCA#GTAGCTCTGTAATGTGTTTCA#.(.(((((..(((((((((((..#)))))))))))..))))).).	1729	1750	1.0	-19.7	0	0.02424586	0.691	5.273360981818183	5.3835487875	-7.649760438237508	17	21	11	3UTR	MIRT563024	0	0
hsa-miR-107	NM_001130674	CALU	AGCAGCATTGTACAGGGCTATCA#AGCCTTGCACAATGCTT#...((((((((.(((((((....#))))))).)))))))).	4606	4623	1.0	-22.5	0	0.0016439	0.559	-0.328409425	-0.4405395512500001	-9.861343503275094	15	17	8	3UTR	MIRT102436	1	1
hsa-miR-107	NM_001130849	CAB39	AGCAGCATTGTACAGGGCTATCA#TGGCTTTGTGGTGTAGTGCTGTG#.(((((((((((((((((((...#))))))))))...))))))))).	3409	3432	1.0	-22.0	1	0.007906164	0.544	-0.09726225	-0.03362613624999996	-3.793324837357118	19	23	10	3UTR	MIRT205548	1	1
hsa-miR-107	NM_001130850	CAB39	AGCAGCATTGTACAGGGCTATCA#TGGCTTTGTGGTGTAGTGCTGTG#.(((((((((((((((((((...#))))))))))...))))))))).	3153	3176	1.0	-22.0	1	0.007906164	0.544	-0.09726225	-0.03362613624999996	-3.793324837357118	19	23	10	3UTR	MIRT205548	1	1
hsa-miR-107	NM_001134422	CDV3	AGCAGCATTGTACAGGGCTATCA#GCATCTGGGCAATGTTGA#..(((((((((.((((((.....#)).)))).))))))))).	3580	3598	1.0	-18.5	1	0.01169585	0.397	0.6146925777777779	0.31796681425	-8.303804028968646	15	18	9	3UTR	MIRT558793	1	0
hsa-miR-107	NM_001134423	CDV3	AGCAGCATTGTACAGGGCTATCA#GCATCTGGGCAATGTTGA#..(((((((((.((((((.....#)).)))).))))))))).	3137	3155	1.0	-18.5	1	0.01169585	0.397	0.6146925777777779	0.31796681425	-8.303804028968646	15	18	9	3UTR	MIRT558793	1	0
hsa-miR-107	NM_001136000	ABL2	AGCAGCATTGTACAGGGCTATCA#GAAAGCTCTTTTAGTGCAGTGTTGTTA#(((((((((((((((((((.((.#)).))))))....))))))))))))).	5023	5050	1.0	-25.6	1	0.01642717	0.632	0.31981897391304354	0.31713536	-3.937574446201665	21	27	13	3UTR	MIRT503231	1	1
hsa-miR-107	NM_001137675	ATXN1L	AGCAGCATTGTACAGGGCTATCA#GATAGGGATGGTATGAAATGCTGCTG#(((((((((((((....(((((.#))))).....))))..))))))))).	5761	5787	1.0	-21.8	1	0.001592798	0.515	1.1100544533333332	0.8065883412499999	-5.762913004276319	18	26	9	3UTR	MIRT048295	1	1
hsa-miR-107	NM_032440	LCOR	AGCAGCATTGTACAGGGCTATCA#GAAGCAGACATTAGCCCTGTAACACAACACTGTA#.((((..(((((((((((((...#.)))))))))...))))..)))).	6926	6960	1.0	-22.6	0	0.03824733	0.618	0.7484441875000001	0.491500465	-7.2379701334214825	17	24	9	3UTR	MIRT178476	1	1
hsa-miR-107	NM_032870	PNISR	AGCAGCATTGTACAGGGCTATCA#GGTGTACTTTTTCCAATGCTGCTC#((((((((((...(((..((((.#))))..)))....)))))))))).	3015	3039	1.0	-18.7	1	0.02224363	0.706	2.8329801	3.4379864524999997	-11.398282843874613	17	24	10	3UTR	MIRT547071	1	0
hsa-miR-107	NM_033224	PURB	AGCAGCATTGTACAGGGCTATCA#TGGTGGTTCTGTTGCTCAGCTGCA#.(((((...((((((((((((((#)))))))))))).))...))))).	3524	3548	1.0	-25.2	0	0.0001098901	0.529	1.535129973333333	2.29020347375	-8.707035959654831	19	24	12	3UTR	MIRT546887	1	1
hsa-miR-107	NM_080550	SYNRG	AGCAGCATTGTACAGGGCTATCA#TGGTCTTGTCTATATAATTGCTGCTT#((((((((((((((((((((...#)))))))))....))))).)))))).	5016	5042	1.0	-20.9	1	0.2588503	0.676	0.5857764800000002	2.2162626875	-3.937574446201665	20	26	9	3UTR	MIRT725127	0	0
hsa-miR-107	NM_133496	SLC30A7	AGCAGCATTGTACAGGGCTATCA#ATGGTTGTGACAGTGCTGTTT#(((((((((((.((.((((((..#)))))).))))))))))))).	2684	2705	1.0	-22.8	1	0.0001916305	0.574	-0.023103181818181807	0.4817773225000002	-8.019827316048655	19	21	13	3UTR	MIRT178640	0	0
hsa-miR-107	NM_133496	SLC30A7	AGCAGCATTGTACAGGGCTATCA#GTAGCCCTATGAGCTGCTC#((((((.((((..((((((((..#)))))))))))))))))).	7125	7144	1.0	-22.0	0	0.0005869411	0.662	-0.12119087500000003	0.17940832999999995	-10.117194903335584	18	19	18	3UTR	MIRT178640	0	0
hsa-miR-107	NM_144499	GNAT1	AGCAGCATTGTACAGGGCTATCA#TGGCTATTGTGAATAATGCTGCTA#((((((((((((((.(((((...#)))))..)))..))))))))))).	3551	3575	1.0	-22.3	1	0.00215437	0.603	0.4956628124999999	0.1710271875	-4.6730240064523	19	24	11	3UTR	MIRT540833	0	0
hsa-miR-107	NM_152279	ZNF585B	AGCAGCATTGTACAGGGCTATCA#TGATGGCCCATCACATGCTGCTC#(((((((.(((...(((((((((#)))))))))...)))))))))).	5207	5230	1.0	-27.8	1	0.03894524	0.529	0.8630084444444444	0.28891601250000004	-11.7439832151653	19	23	10	3UTR	MIRT543300	0	0
hsa-miR-107	NM_001300905	BAZ2A	AGCAGCATTGTACAGGGCTATCA#GATAGCTATCCCCTGTATGATGTTGG#..((((((((((((((((((((.#)))))).....)))))))))))))).	6629	6655	1.0	-27.1	1	0.0001747584	0.485	2.8542696079999996	2.6949158207124997	-4.95700071937229	20	26	14	3UTR	MIRT543064	1	1
hsa-miR-107	NM_001317122	AGO1	AGCAGCATTGTACAGGGCTATCA#CCCTGTCAGATGCTGCTA#(((((((((..((((((......#))))))..))))))))).	12720	12738	1.0	-25.4	1	0.004000498	0.559	0.0	0.0	-8.004855389940193	15	18	9	3UTR	MIRT026978	1	1
hsa-miR-107	NM_001317123	AGO1	AGCAGCATTGTACAGGGCTATCA#CCCTGTCAGATGCTGCTA#(((((((((..((((((......#))))))..))))))))).	12625	12643	1.0	-25.4	1	0.004000498	0.559	0.0	0.0	-8.004855389940193	15	18	9	3UTR	MIRT026978	1	1
hsa-miR-107	NM_001321853	JAK1	AGCAGCATTGTACAGGGCTATCA#GATAGCTGTGGAATAGATAATTTGCTGCA#.((((((((((.((.(((((((.#))))))).))..))))......)))))).	4600	4629	1.0	-23.1	1	0.005379807	0.574	3.5921578125	2.92294970625	-7.875577707204108	19	29	7	3UTR	MIRT054776	0	1
hsa-miR-107	NM_001321855	JAK1	AGCAGCATTGTACAGGGCTATCA#GATAGCTGTGGAATAGATAATTTGCTGCA#.((((((((((.((.(((((((.#))))))).))..))))......)))))).	4499	4528	1.0	-23.1	1	0.005379807	0.574	2.2680860624999997	3.6573974724999996	-7.875577707204108	19	29	7	3UTR	MIRT054776	0	1
hsa-miR-107	NM_001321856	JAK1	AGCAGCATTGTACAGGGCTATCA#GATAGCTGTGGAATAGATAATTTGCTGCA#.((((((((((.((.(((((((.#))))))).))..))))......)))))).	4254	4283	1.0	-23.1	1	0.005379807	0.574	2.923619625	4.5244615800000005	-7.875577707204108	19	29	7	3UTR	MIRT054776	0	1
hsa-miR-107	NM_001321857	JAK1	AGCAGCATTGTACAGGGCTATCA#GATAGCTGTGGAATAGATAATTTGCTGCA#.((((((((((.((.(((((((.#))))))).))..))))......)))))).	4412	4441	1.0	-23.1	1	0.005379807	0.574	3.2499616749999998	3.7894309125000003	-7.875577707204108	19	29	7	3UTR	MIRT054776	0	1
hsa-miR-107	NM_001322259	CCNE1	AGCAGCATTGTACAGGGCTATCA#GTTTTGTAAGTGCTGCTA#(((((((((.((((((((.....#))))))))))))))))).	1758	1776	1.0	-21.3	1	0.0421448	0.721	4.230239999999999	2.115999059464286	-5.180080914529843	17	18	17	3UTR	MIRT004693	1	0
hsa-miR-107	NM_001322262	CCNE1	AGCAGCATTGTACAGGGCTATCA#GTTTTGTAAGTGCTGCTA#(((((((((.((((((((.....#))))))))))))))))).	1846	1864	1.0	-21.3	1	0.0421448	0.721	4.230239999999999	2.115999059464286	-5.180080914529843	17	18	17	3UTR	MIRT004693	1	0
hsa-miR-107	NM_001322406	PNISR	AGCAGCATTGTACAGGGCTATCA#GGTGTACTTTTTCCAATGCTGCTC#((((((((((...(((..((((.#))))..)))....)))))))))).	3127	3151	1.0	-18.7	1	0.02224363	0.706	3.3038462199999996	3.0506170725000006	-11.398282843874613	17	24	10	3UTR	MIRT547071	1	0
hsa-miR-107	NM_001330073	MPDU1	AGCAGCATTGTACAGGGCTATCA#TGACATTTGAGTGCTTTCGTAAGCCCTGTACATGTA#....(((.(((((((((((....#.)))))))))))))).	1118	1154	1.0	-22.9	0	0.0009454472	0.603	-0.13479533636363636	-0.42783682999999995	-11.86019739781856	14	16	14	3UTR	MIRT532193	0	0
hsa-miR-107	NM_000172	GNAT1	AGCAGCATTGTACAGGGCTATCA#TGATGAATGGTTACATCTGCCTTTTGGCTATTGTGAATAATGCTGCTA#((((((((((((((.(((((...#.)))))..)))..))))))))))).	2393	2441	1.0	-22.5	1	0.00215437	0.603	-0.01285712499999997	0.2908112048076922	-4.6730240064523	19	25	11	3UTR	MIRT540833	0	0
hsa-miR-107	NM_000330	RS1	AGCAGCATTGTACAGGGCTATCA#GCGCTAATACAGTGCTGG#..((((((((((.((.((.....#)).))..)))))))))).	2055	2073	1.0	-19.8	1	0.0006800147	0.515	0.0	0.0	-6.479180412342145	14	18	10	3UTR	MIRT682264	0	0
hsa-miR-107	NM_000914	OPRM1	AGCAGCATTGTACAGGGCTATCA#GATAGCTTTGTGAGCTGCA#.(((((....((((((((((((.#)))))))))))).))))).	5467	5486	1.0	-24.4	0	0.0002935713	0.603	0.0	0.0	-9.94954242798301	17	19	12	3UTR	MIRT054668	0	0
hsa-miR-107	NM_001005386	ACTR2	AGCAGCATTGTACAGGGCTATCA#GCTCTAATGCTGCTA#(((((((((....(((((.....#)))))))))))))).	1579	1594	1.0	-19.0	1	0.002235018	0.588	0.0	0.0	-12.640789312202793	14	15	14	3UTR	MIRT089209	0	1
hsa-miR-107	NM_001006610	SIAH1	AGCAGCATTGTACAGGGCTATCA#TGTGAGTCAATACATAGTGCTGCTG#(((((((((((....((((..((#))..)))).....))))))))))).	1780	1805	1.0	-20.3	1	0.0007456652	0.632	0.0	0.0	-10.165797846235305	17	25	11	3UTR	MIRT735183	0	0
hsa-miR-107	NM_001006945	LRIF1	AGCAGCATTGTACAGGGCTATCA#CCCAGGCAAATGCTGCTT#(((((((((...(.(((......#))).)...))))))))).	1667	1685	1.0	-18.1	1	0.0001983845	0.632	0.0	0.0	-12.208498617056957	13	18	9	3UTR	MIRT544258	0	0
hsa-miR-107	NM_001031812	CSNK1G3	AGCAGCATTGTACAGGGCTATCA#GATGTGCCATGCAATGGTGTC#.(((.(((((((...(((((((.#)))).))).))))))).))).	2874	2895	1.0	-20.0	0	9.785455e-05	0.662	0.0	0.0	-10.793782102606874	17	21	7	3UTR	MIRT502685	1	1
hsa-miR-107	NM_001033002	RPAIN	AGCAGCATTGTACAGGGCTATCA#TGAGGAGCCTTGTACATACAAGCC#.((.....(((((((((((.(((#)))..))))))))))).....)).	741	765	1.0	-20.5	0	0.0007972158	0.676	0.0	0.0	-16.702664512373776	16	24	11	3UTR	MIRT048299	0	0
hsa-miR-107	NM_001037813	ZNF284	AGCAGCATTGTACAGGGCTATCA#AGCCAATGCTATGCTGCTT#((((((((.(((...((((....#))))..))).)))))))).	2931	2950	1.0	-20.3	1	0.01392566	0.515	0.0	0.0	-7.875384194884712	15	19	8	3UTR	MIRT783080	0	0
hsa-miR-107	NM_001039802	CDC42	AGCAGCATTGTACAGGGCTATCA#TGGTACCCTTGTGCAGTGCA#....(((((((((((((.(((((#))))).))))))))))))).	6164	6184	1.0	-25.4	0	4.745459e-06	0.559	0.0	0.0	-9.546562468637928	18	20	13	3UTR	MIRT734260	0	0
hsa-miR-107	NM_001039802	CDC42	AGCAGCATTGTACAGGGCTATCA#TGGTAGCAGAGCTGGGCGTGAAACCTGCATTCCTGGCCTCTCCTTTTGTGGTGCTTACAGTGCTGTG#.(((((((((((.((.(((((..#.))))).))))))))))))).	6430	6497	1.0	-23.3	1	0.0008054085	0.559	0.0	0.0	-5.315504530326973	18	21	13	3UTR	MIRT734260	0	0
hsa-miR-10b-5p	NM_030648	SETD7	TACCCTGTAGAACCGAATTTGTG#CACAATTTCTTTGCAGGGC#..(((((((((...(((.(((((#))))).)))))))))))).	5629	5648	0.9538461538461539	-18.9	1	0.001670228	0.485	3.413676888888889	2.657177785375001	-10.449774559155296	17	19	12	3UTR	MIRT047488	0	0
hsa-miR-10b-5p	XM_047436933	TMEM101	TACCCTGTAGAACCGAATTTGTG#TGGGTTCTCAGGGTAT#(((((((.((((((.(.......#).))))))))))))).	1661	1677	0.9743589743589743	-21.5	1	0.0002891011	0.441	0.0	0.0	-6.9866589356329305	14	16	13	3UTR	MIRT549622	0	0
hsa-miR-10b-5p	NM_001363763	CDKN2A	TACCCTGTAGAACCGAATTTGTG#GGTCCTACAGGGC#..((((((((.(((.........#))).)))))))).	880	893	1.0	-19.4	1	1.552881e-05	0.397	0.0	0.0	-8.750273835336888	11	13	8	3UTR	MIRT006368	0	0
hsa-miR-10b-5p	NM_001363816	LMF2	TACCCTGTAGAACCGAATTTGTG#TGGGGTTTGCAGGGTGC#(((((((((((.((.(.......#).)).))))))))))).	2351	2368	1.0	-19.1	1	0.0003662898	0.294	0.0	0.0	-8.019827316048655	14	17	11	3UTR	MIRT047491	0	0
hsa-miR-10b-5p	XM_047422597	CDKN2A	TACCCTGTAGAACCGAATTTGTG#GGTCCTACAGGGC#..((((((((.(((.........#))).)))))))).	464	477	1.0	-19.4	1	1.552881e-05	0.397	0.0	0.0	-8.750273835336888	11	13	8	3UTR	MIRT006368	0	0
hsa-miR-10b-5p	XM_047448834	NR2C2	TACCCTGTAGAACCGAATTTGTG#GGTTCTGACAGGGTGA#((((((((((((((.........#))))))).))))))).	6309	6325	1.0	-22.5	1	0.00414134	0.544	0.0	0.0	-4.906073086755913	14	16	7	3UTR	MIRT522214	1	1
hsa-miR-10b-5p	NM_152734	C6orf89	TACCCTGTAGAACCGAATTTGTG#AGAAAGTGGGGCTGCAGGGTGA#((((((((((..(((........#.)))..)))))))))).	3556	3578	1.0	-22.7	1	0.0009427979	0.441	-0.67331835	-0.34606560625000005	-10.342201311511984	13	17	10	3UTR	MIRT625243	0	0
hsa-miR-10b-5p	NM_173200	NR4A3	TACCCTGTAGAACCGAATTTGTG#TGGTCATACAGGGTAA#(((((((((..((((........#))))..))))))))).	3661	3677	1.0	-20.1	1	0.0004009781	0.588	0.0	0.0	-8.237904470243807	13	16	9	3UTR	MIRT025586	1	1
hsa-miR-10b-5p	NM_178562	TSPAN33	TACCCTGTAGAACCGAATTTGTG#CTCAGTATTCCTACAGGGTAA#((((((((((.............#.)))))))))).	1999	2020	1.0	-17.6	1	0.0002043402	0.456	0.37382329	0.30729065025	-13.223621401949268	10	12	10	3UTR	MIRT047482	0	1
hsa-miR-10b-5p	NM_001370099	ZMYND11	TACCCTGTAGAACCGAATTTGTG#ATTCTCCAGGTTTGTCAGGGTC#.((((((..(((((.........#.)))))..)))))).	3247	3269	1.0	-18.2	1	0.0001943474	0.676	0.0	0.0	-8.13184806533776	11	15	6	3UTR	MIRT056370	1	1
hsa-miR-10b-5p	NM_001370100	ZMYND11	TACCCTGTAGAACCGAATTTGTG#ATTCTCCAGGTTTGTCAGGGTC#.((((((..(((((.........#.)))))..)))))).	3314	3336	1.0	-18.2	1	0.0001943474	0.676	0.0	0.0	-8.13184806533776	11	15	6	3UTR	MIRT056370	1	1
hsa-miR-10b-5p	NM_001370102	ZMYND11	TACCCTGTAGAACCGAATTTGTG#ATTCTCCAGGTTTGTCAGGGTC#.((((((..(((((.........#.)))))..)))))).	3818	3840	1.0	-18.2	1	0.0001943474	0.676	0.0	0.0	-8.13184806533776	11	15	6	3UTR	MIRT056370	1	1
hsa-miR-10b-5p	NM_001370103	ZMYND11	TACCCTGTAGAACCGAATTTGTG#ATTCTCCAGGTTTGTCAGGGTC#.((((((..(((((.........#.)))))..)))))).	3295	3317	1.0	-18.2	1	0.0001943474	0.676	0.0	0.0	-8.13184806533776	11	15	6	3UTR	MIRT056370	1	1
hsa-miR-10b-5p	NM_001370110	ZMYND11	TACCCTGTAGAACCGAATTTGTG#ATTCTCCAGGTTTGTCAGGGTC#.((((((..(((((.........#.)))))..)))))).	2992	3014	1.0	-18.2	1	0.0001943474	0.676	0.0	0.0	-8.13184806533776	11	15	6	3UTR	MIRT056370	1	1
hsa-miR-10b-5p	NM_001370114	ZMYND11	TACCCTGTAGAACCGAATTTGTG#ATTCTCCAGGTTTGTCAGGGTC#.((((((..(((((.........#.)))))..)))))).	3154	3176	1.0	-18.2	1	0.0001943474	0.676	0.0	0.0	-8.13184806533776	11	15	6	3UTR	MIRT056370	1	1
hsa-miR-10b-5p	NM_001370115	ZMYND11	TACCCTGTAGAACCGAATTTGTG#ATTCTCCAGGTTTGTCAGGGTC#.((((((..(((((.........#.)))))..)))))).	3299	3321	1.0	-18.2	1	0.0001943474	0.676	0.0	0.0	-8.13184806533776	11	15	6	3UTR	MIRT056370	1	1
hsa-miR-10b-5p	NM_001370118	ZMYND11	TACCCTGTAGAACCGAATTTGTG#ATTCTCCAGGTTTGTCAGGGTC#.((((((..(((((.........#.)))))..)))))).	3377	3399	1.0	-18.2	1	0.0001943474	0.676	0.8100526666666665	0.9729188499999999	-8.13184806533776	11	15	6	3UTR	MIRT056370	1	1
hsa-miR-10b-5p	NM_001371427	CREB1	TACCCTGTAGAACCGAATTTGTG#TTTGGTTTTTGAGGGTT#.(((((..(((((((((......#)))))))))..))))).	6979	6996	1.0	-17.1	0	0.005042156	0.559	0.0	0.0	-7.650646301409068	14	17	9	3UTR	MIRT735229	1	1
hsa-miR-10b-5p	NM_001371428	CREB1	TACCCTGTAGAACCGAATTTGTG#TTTGGTTTTTGAGGGTT#.(((((..(((((((((......#)))))))))..))))).	6934	6951	1.0	-17.1	0	0.005042156	0.559	0.0	0.0	-7.650646301409068	14	17	9	3UTR	MIRT735229	1	1
hsa-miR-10b-5p	NM_001378590	XIAP	TACCCTGTAGAACCGAATTTGTG#GGTTTTATAGGGG#..((((((((((((.........#)))))))))))).	2428	2441	1.0	-19.9	1	0.01334914	0.5	0.0	0.0	-5.925499359926538	12	13	12	3UTR	MIRT697610	0	0
hsa-miR-10b-5p	NM_001394024	PTPRT	TACCCTGTAGAACCGAATTTGTG#GGGAGGGGGTGGAACTGCAGGGA#..((((((((..(((........#.)))..)))))))).	5270	5293	1.0	-16.9	1	0.001259825	0.5	0.0	0.0	-11.361627584682608	11	15	8	3UTR	MIRT047447	0	0
hsa-miR-10b-5p	NM_001394025	PTPRT	TACCCTGTAGAACCGAATTTGTG#GGGAGGGGGTGGAACTGCAGGGA#..((((((((..(((........#.)))..)))))))).	5237	5260	1.0	-16.9	1	0.001259825	0.5	0.0	0.0	-11.361627584682608	11	15	8	3UTR	MIRT047447	0	0
hsa-miR-10b-5p	NM_015986	CRLF3	TACCCTGTAGAACCGAATTTGTG#GCTTGGCTTTGGTTTTCAGGGTC#.((((((.(((((((((......#.))))))))))))))).	1380	1403	1.0	-19.7	1	0.004323784	0.515	1.2851831111111112	0.6321606074999999	-6.106959766537749	15	17	15	3UTR	MIRT558567	1	1
hsa-miR-10b-5p	NM_017736	THUMPD1	TACCCTGTAGAACCGAATTTGTG#GGTTCTCTGCAGGGG#..((((((((((((.........#)))..))))))))).	3250	3265	1.0	-19.7	1	0.0005035321	0.544	0.3213288714285714	0.2705866075000001	-5.925499359926538	12	15	9	3UTR	MIRT047484	0	0
hsa-miR-10b-5p	NM_017849	TMEM127	TACCCTGTAGAACCGAATTTGTG#CACGTGTGCCCTGGTTTTATGGGGA#..(((((((((((((........#.))))))))))))).	1516	1541	1.0	-18.3	1	3.118749e-05	0.456	-0.2776253615384615	-0.21046374999999998	-5.1900497996759025	13	15	13	3UTR	MIRT698360	0	0
hsa-miR-10b-5p	NM_001193304	TMEM127	TACCCTGTAGAACCGAATTTGTG#CACGTGTGCCCTGGTTTTATGGGGA#..(((((((((((((........#.))))))))))))).	1493	1518	1.0	-18.3	1	3.118749e-05	0.456	-0.4081512846153845	-0.24803941375000005	-5.1900497996759025	13	15	13	3UTR	MIRT698360	0	0
hsa-miR-10b-5p	NM_001195132	CDKN2A	TACCCTGTAGAACCGAATTTGTG#GGTCCTACAGGGC#..((((((((.(((.........#))).)))))))).	753	766	1.0	-19.4	1	1.552881e-05	0.397	1.25749275	0.8733668025000001	-8.750273835336888	11	13	8	3UTR	MIRT006368	0	0
hsa-miR-10b-5p	NM_001205019	GK	TACCCTGTAGAACCGAATTTGTG#GGTTCTAACAGGGC#..((((((((((((.........#))))))).))))).	2588	2602	1.0	-20.1	1	0.0006843335	0.647	1.0195950615384617	1.1659496946499999	-5.925499359926538	12	14	7	3UTR	MIRT047490	0	0
hsa-miR-10b-5p	NM_001206491	MAVS	TACCCTGTAGAACCGAATTTGTG#ACTCTCATGGGTTTTGCAGGGA#..((((((((((((.(.......#.).)))))))))))).	8566	8588	1.0	-21.3	1	0.0003107988	0.603	0.11526758333333333	0.05602347000000002	-5.692450279622925	13	16	12	3UTR	MIRT661939	0	0
hsa-miR-10b-5p	NM_001271818	ORAI2	TACCCTGTAGAACCGAATTTGTG#CAGAGGGTTCTGGGGGTGA#((((((.(((((((.........#.))))))))))))).	9902	9921	1.0	-18.3	0	1.455372e-08	0.397	-0.47919	-0.47807329750000005	-6.449759621627232	13	15	13	3UTR	MIRT047449	0	0
hsa-miR-10b-5p	NM_001278579	ACVR2A	TACCCTGTAGAACCGAATTTGTG#TTCTTTTGCAGGGTAT#((((((((((((...........#.)))))))))))).	4185	4201	1.0	-16.8	1	0.005482173	0.647	2.9179248333333327	1.7408294037500003	-7.052043616942562	12	14	12	3UTR	MIRT568634	0	1
hsa-miR-10b-5p	NM_001278580	ACVR2A	TACCCTGTAGAACCGAATTTGTG#TTCTTTTGCAGGGTAT#((((((((((((...........#.)))))))))))).	3988	4004	1.0	-16.8	1	0.005482173	0.647	2.9179248333333327	1.7408294037500003	-7.052043616942562	12	14	12	3UTR	MIRT568634	0	1
hsa-miR-10b-5p	NM_001282683	FBXO31	TACCCTGTAGAACCGAATTTGTG#GCCAGTTCTTGGCTCCGGTTCTGTAGGGA#..(((((((((((((........#.))))))))))))).	3636	3665	1.0	-21.2	1	6.564046e-05	0.456	-0.2028694538461538	-0.29124526625	-5.1900497996759025	13	15	13	3UTR	MIRT714402	0	0
hsa-miR-10b-5p	NM_001286635	C6orf89	TACCCTGTAGAACCGAATTTGTG#AGAAAGTGGGGCTGCAGGGTGA#((((((((((..(((........#.)))..)))))))))).	3656	3678	1.0	-22.7	1	0.0009427979	0.441	-0.67331835	-0.34606560625000005	-10.342201311511984	13	17	10	3UTR	MIRT625243	0	0
hsa-miR-10b-5p	NM_001286636	C6orf89	TACCCTGTAGAACCGAATTTGTG#AGAAAGTGGGGCTGCAGGGTGA#((((((((((..(((........#.)))..)))))))))).	3834	3856	1.0	-22.7	1	0.0009427979	0.441	-0.67331835	-0.34606560625000005	-10.342201311511984	13	17	10	3UTR	MIRT625243	0	0
hsa-miR-10b-5p	NM_019593	GPCPD1	TACCCTGTAGAACCGAATTTGTG#AAATTTCAAAATGCTGCAGGGTAA#((((((((((.............#.)))))))))).	2856	2880	1.0	-17.4	1	0.0371398	0.794	1.01778218	1.35424990375	-13.223621401949268	10	12	10	3UTR	MIRT507099	1	0
hsa-miR-10b-5p	NM_020746	MAVS	TACCCTGTAGAACCGAATTTGTG#ACTCTCATGGGTTTTGCAGGGA#..((((((((((((.(.......#.).)))))))))))).	8741	8763	1.0	-21.3	1	0.0003107988	0.603	-0.39459065	-0.0016050175000000277	-5.692450279622925	13	16	12	3UTR	MIRT661939	0	0
hsa-miR-10b-5p	NM_024735	FBXO31	TACCCTGTAGAACCGAATTTGTG#GCCAGTTCTTGGCTCCGGTTCTGTAGGGA#..(((((((((((((........#.))))))))))))).	3857	3886	1.0	-21.2	1	6.564046e-05	0.456	-0.799545153846154	-0.6754251037500002	-5.1900497996759025	13	15	13	3UTR	MIRT714402	0	0
hsa-miR-10b-5p	NM_030648	SETD7	TACCCTGTAGAACCGAATTTGTG#TTGGGAAGCTACAGGGA#..((((((((..((((.......#))))....)))))))).	6292	6309	1.0	-18.3	1	0.001933982	0.632	3.1265395625	4.255042939999999	-11.128578504378995	12	17	8	3UTR	MIRT047488	0	0
hsa-miR-10b-5p	NM_001145436	LSS	TACCCTGTAGAACCGAATTTGTG#CATGAACCCACCTGCGTGGAATGCTGTTTGTGAGGTGTCTACAGGGTT#.(((((((((((((..((.....#.))..))).)))))))))).	2951	2999	1.0	-20.9	1	0.0001371314	0.544	3.610610714285715	3.0557883075000003	-4.761823477911366	15	20	10	3UTR	MIRT047498	0	1
hsa-miR-10b-5p	NM_001145437	LSS	TACCCTGTAGAACCGAATTTGTG#CATGAACCCACCTGCGTGGAATGCTGTTTGTGAGGTGTCTACAGGGTT#.(((((((((((((..((.....#.))..))).)))))))))).	3116	3164	1.0	-20.9	1	0.0001371314	0.544	2.4160047857142857	4.826397292499999	-4.761823477911366	15	20	10	3UTR	MIRT047498	0	1
hsa-miR-10b-5p	NM_001164440	ANKRD33B	TACCCTGTAGAACCGAATTTGTG#AATTCGGCAGGGCAGGGTAT#((((((((....(((((((....#)))))))....)))))))).	3274	3294	1.0	-21.2	1	0.01657585	0.529	0.09832207500000001	0.16855680125000003	-12.408048357782313	15	20	8	3UTR	MIRT508099	0	0
hsa-miR-10b-5p	NM_001167	XIAP	TACCCTGTAGAACCGAATTTGTG#GGTTTTATAGGGG#..((((((((((((.........#)))))))))))).	2573	2586	1.0	-19.9	1	0.01334914	0.5	0.3820601833333333	1.0011003562499998	-5.925499359926538	12	13	12	3UTR	MIRT697610	0	0
hsa-miR-10b-5p	NM_001174125	SLC11A2	TACCCTGTAGAACCGAATTTGTG#GCTCCCTTGAGGTTCTGCTAGTGGTGT#((((((((((((((.........#.)))))))).)).)))).	4011	4038	1.0	-18.2	1	0.04001287	0.529	1.6528143750000002	1.42959096	-4.906073086755913	14	18	8	3UTR	MIRT635874	0	0
hsa-miR-10b-5p	NM_001174130	SLC11A2	TACCCTGTAGAACCGAATTTGTG#GCTCCCTTGAGGTTCTGCTAGTGGTGT#((((((((((((((.........#.)))))))).)).)))).	3972	3999	1.0	-18.2	1	0.04001287	0.529	0.5962119749999999	0.7732061908749999	-4.906073086755913	14	18	8	3UTR	MIRT635874	0	0
hsa-miR-10b-5p	NM_005441	CHAF1B	TACCCTGTAGAACCGAATTTGTG#CGGTGTGTGCAGGGA#..(((((((.(((((........#)))).).))))))).	1854	1869	1.0	-18.1	1	6.669261e-06	0.382	-0.030895000000000023	-0.40230791499999996	-6.432556268004081	12	15	7	3UTR	MIRT636640	0	0
hsa-miR-10b-5p	NM_006459	ERLIN1	TACCCTGTAGAACCGAATTTGTG#TGGTGGCCTGCAGGGA#..((((((((.((((........#))))...)))))))).	2037	2053	1.0	-17.6	1	7.102432e-07	0.456	2.1734741250000003	1.109537575	-8.014824275086253	12	16	8	3UTR	MIRT047443	0	0
hsa-miR-10b-5p	NM_006981	NR4A3	TACCCTGTAGAACCGAATTTGTG#TGGTCATACAGGGTAA#(((((((((..((((........#))))..))))))))).	3589	3605	1.0	-20.1	1	0.0004009781	0.588	4.550636222222223	1.1182596462749996	-8.237904470243807	13	16	9	3UTR	MIRT025586	1	1
hsa-miR-10b-5p	NM_007050	PTPRT	TACCCTGTAGAACCGAATTTGTG#GGGAGGGGGTGGAACTGCAGGGA#..((((((((..(((........#.)))..)))))))).	5213	5236	1.0	-16.9	1	0.001259825	0.5	-0.11758281749999999	0.44528341	-11.361627584682608	11	15	8	3UTR	MIRT047447	0	0
hsa-miR-10b-5p	NM_001450	FHL2	TACCCTGTAGAACCGAATTTGTG#TGGTTTGCAGGGC#..((((((((.((((........#)))))))))))).	3606	3619	1.0	-16.6	1	5.323134e-05	0.515	0.0	0.0	-8.014824275086253	12	13	12	3UTR	MIRT523699	0	0
hsa-miR-10b-5p	NM_002340	LSS	TACCCTGTAGAACCGAATTTGTG#CATGAACCCACCTGCGTGGAATGCTGTTTGTGAGGTGTCTACAGGGTT#.(((((((((((((..((.....#.))..))).)))))))))).	2984	3032	1.0	-20.9	1	0.0001371314	0.544	0.0	0.0	-4.761823477911366	15	20	10	3UTR	MIRT047498	0	1
hsa-miR-10b-5p	NM_002522	NPTX1	TACCCTGTAGAACCGAATTTGTG#TTGGATCTGCAGGGA#..(((((((((.((((.......#)))).))))))))).	3377	3392	1.0	-20.9	1	9.311534e-07	0.397	0.0	0.0	-8.303804028968646	13	15	9	3UTR	MIRT047499	0	0
hsa-miR-10b-5p	NM_003012	SFRP1	TACCCTGTAGAACCGAATTTGTG#CATCAAGTTCTCCCCAGGGTAG#(((((((..((...(((((((((#)).)))))))))..))))))).	3959	3981	1.0	-17.0	1	8.310208e-06	0.529	0.0	0.0	-12.800372873411064	18	22	9	3UTR	MIRT448050	0	0
hsa-miR-10b-5p	NM_003298	NR2C2	TACCCTGTAGAACCGAATTTGTG#GGTTCTGACAGGGTGA#((((((((((((((.........#))))))).))))))).	6537	6553	1.0	-22.5	1	0.00414134	0.544	0.0	0.0	-4.906073086755913	14	16	7	3UTR	MIRT522214	1	1
hsa-miR-10b-5p	NM_004379	CREB1	TACCCTGTAGAACCGAATTTGTG#TTTGGTTTTTGAGGGTT#.(((((..(((((((((......#)))))))))..))))).	7095	7112	1.0	-17.1	0	0.005042156	0.559	0.0	0.0	-7.650646301409068	14	17	9	3UTR	MIRT735229	1	1
hsa-miR-10b-5p	NM_203391	GK	TACCCTGTAGAACCGAATTTGTG#GGTTCTAACAGGGC#..((((((((((((.........#))))))).))))).	2501	2515	1.0	-20.1	1	0.0006843335	0.647	1.0351127923076926	1.03243823875	-5.925499359926538	12	14	7	3UTR	MIRT047490	0	0
hsa-miR-10b-5p	XM_006724483	GK	TACCCTGTAGAACCGAATTTGTG#GGTTCTAACAGGGC#..((((((((((((.........#))))))).))))).	2654	2668	1.0	-20.1	1	0.0006843335	0.647	0.0	0.0	-5.925499359926538	12	14	7	3UTR	MIRT047490	0	0
hsa-miR-10b-5p	XM_017004452	TMEM127	TACCCTGTAGAACCGAATTTGTG#CACGTGTGCCCTGGTTTTATGGGGA#..(((((((((((((........#.))))))))))))).	1113	1138	1.0	-18.3	1	3.118749e-05	0.456	0.0	0.0	-5.1900497996759025	13	15	13	3UTR	MIRT698360	0	0
hsa-miR-10b-5p	NM_001100626	ERLIN1	TACCCTGTAGAACCGAATTTGTG#TGGTGGCCTGCAGGGA#..((((((((.((((........#))))...)))))))).	1713	1729	1.0	-17.6	1	7.102432e-07	0.456	1.674666375	2.061236988075	-8.014824275086253	12	16	8	3UTR	MIRT047443	0	0
hsa-miR-10b-5p	NM_001128127	GK	TACCCTGTAGAACCGAATTTGTG#GGTTCTAACAGGGC#..((((((((((((.........#))))))).))))).	2570	2584	1.0	-20.1	1	0.0006843335	0.647	1.0351127923076926	1.03243823875	-5.925499359926538	12	14	7	3UTR	MIRT047490	0	0
hsa-miR-10b-5p	NM_001134441	ZNF502	TACCCTGTAGAACCGAATTTGTG#TGGGAATACAGGGTAG#(((((((((...(((........#)))...))))))))).	1965	1981	1.0	-18.3	1	9.163415e-05	0.544	-0.16998446666666667	0.09640066750000001	-11.584707779840164	12	16	9	3UTR	MIRT531040	0	1
hsa-miR-10b-5p	NM_001134442	ZNF502	TACCCTGTAGAACCGAATTTGTG#TGGGAATACAGGGTAG#(((((((((...(((........#)))...))))))))).	1961	1977	1.0	-18.3	1	9.163415e-05	0.544	-0.2567642888888889	-0.05701490749999996	-11.584707779840164	12	16	9	3UTR	MIRT531040	0	1
hsa-miR-10b-5p	NM_033210	ZNF502	TACCCTGTAGAACCGAATTTGTG#TGGGAATACAGGGTAG#(((((((((...(((........#)))...))))))))).	2063	2079	1.0	-18.3	1	9.163415e-05	0.544	-0.16998446666666667	0.09640066750000001	-11.584707779840164	12	16	9	3UTR	MIRT531040	0	1
hsa-miR-10b-5p	NM_058195	CDKN2A	TACCCTGTAGAACCGAATTTGTG#GGTCCTACAGGGC#..((((((((.(((.........#))).)))))))).	630	643	1.0	-19.4	1	1.552881e-05	0.397	1.1992924500000002	2.4346028875000005	-8.750273835336888	11	13	8	3UTR	MIRT006368	0	0
hsa-miR-10b-5p	NM_138927	SON	TACCCTGTAGAACCGAATTTGTG#CACAATGGGTTCTGCTGGA#...((.((((((((....(((((#)))))..)))))))).)).	7874	7893	1.0	-19.7	0	0.00498073	0.544	3.11028125	2.1462368174999993	-9.383997595426033	15	19	8	3UTR	MIRT510734	1	1
hsa-miR-10b-5p	NM_001291694	NR2C2	TACCCTGTAGAACCGAATTTGTG#GGTTCTGACAGGGTGA#((((((((((((((.........#))))))).))))))).	6480	6496	1.0	-22.5	1	0.00414134	0.544	0.550973376	0.14075666199999998	-4.906073086755913	14	16	7	3UTR	MIRT522214	1	1
hsa-miR-10b-5p	NM_001304550	THUMPD1	TACCCTGTAGAACCGAATTTGTG#GGTTCTCTGCAGGGG#..((((((((((((.........#)))..))))))))).	2749	2764	1.0	-19.7	1	0.0005035321	0.544	0.3213288714285714	0.2705866075000001	-5.925499359926538	12	15	9	3UTR	MIRT047484	0	0
hsa-miR-10b-5p	NM_001318896	FHL2	TACCCTGTAGAACCGAATTTGTG#TGGTTTGCAGGGC#..((((((((.((((........#)))))))))))).	3478	3491	1.0	-16.6	1	5.323134e-05	0.515	0.7900213749999999	0.23987378249999997	-8.014824275086253	12	13	12	3UTR	MIRT523699	0	0
hsa-miR-10b-5p	NM_000077	CDKN2A	TACCCTGTAGAACCGAATTTGTG#GGTCCTACAGGGC#..((((((((.(((.........#))).)))))))).	556	569	1.0	-19.4	1	1.552881e-05	0.397	1.25749275	0.8733668025000001	-8.750273835336888	11	13	8	3UTR	MIRT006368	0	0
hsa-miR-10b-5p	NM_000167	GK	TACCCTGTAGAACCGAATTTGTG#GGTTCTAACAGGGC#..((((((((((((.........#))))))).))))).	2483	2497	1.0	-20.1	1	0.0006843335	0.647	1.0195950615384617	1.1659496946499999	-5.925499359926538	12	14	7	3UTR	MIRT047490	0	0
hsa-miR-10b-5p	NM_000389	CDKN1A	TACCCTGTAGAACCGAATTTGTG#CACCTCCTCTAAGGTTGGGCAGGGTGA#((((((((..((((.........#.))))..)))))))).	1108	1135	1.0	-17.7	1	6.505469e-07	0.397	0.0	0.0	-7.204969213329855	12	16	8	3UTR	MIRT006369	0	0
hsa-miR-10b-5p	NM_000617	SLC11A2	TACCCTGTAGAACCGAATTTGTG#GCTCCCTTGAGGTTCTGCTAGTGGTGT#((((((((((((((.........#.)))))))).)).)))).	4020	4047	1.0	-18.2	1	0.04001287	0.529	0.0	0.0	-4.906073086755913	14	18	8	3UTR	MIRT635874	0	0
hsa-miR-10b-5p	NM_000966	RARG	TACCCTGTAGAACCGAATTTGTG#TTGGTGCCTAATGCTGTGTGATGCACCTGCAGGGTGT#((((((((((.............#.)))))))))).	2245	2282	1.0	-17.1	1	9.277609e-08	0.397	0.0	0.0	-13.223621401949268	10	12	10	3UTR	MIRT439118	0	0
hsa-miR-10b-5p	NM_001039492	FHL2	TACCCTGTAGAACCGAATTTGTG#TGGTTTGCAGGGC#..((((((((.((((........#)))))))))))).	3529	3542	1.0	-16.6	1	5.323134e-05	0.515	0.0	0.0	-8.014824275086253	12	13	12	3UTR	MIRT523699	0	0
hsa-miR-10b-5p	NM_001039547	GK5	TACCCTGTAGAACCGAATTTGTG#CACTCTGGTGCTATAGGGA#..((((((((.((((........#.)))).)))))))).	6787	6806	1.0	-17.7	1	7.332447e-06	0.588	0.0	0.0	-8.014824275086253	12	15	8	3UTR	MIRT708130	0	0
hsa-miR-1228-5p	NM_001145340	MDM2	GTGGGCGGGGGCAGGTGTGTG#CACACCTCCCCAGCCCACT#((((((.((((.(((((((..#))))))))))).)))))).	7594	7613	0.9615384615384616	-34.0	0	0.02543043	0.5	-0.25394357142857144	0.049227422125	-8.82806429066934	17	19	11	3UTR	MIRT761445	0	0
hsa-miR-1228-5p	XM_024450656	ZNF652	GTGGGCGGGGGCAGGTGTGTG#GCTCACTGCAACCCCCGCCCC#..(((((((((..((((.((.#)).))))....))))))))).	4190	4211	0.9807692307692307	-28.6	1	0.0002741395	0.368	0.0	0.0	-9.592934641634889	15	21	9	3UTR	MIRT697296	0	0
hsa-miR-1228-5p	XM_011537585	SLC36A1	GTGGGCGGGGGCAGGTGTGTG#GCAGCTGCCTACCCCTGCCCCA#(.(((((((((.((((.(((.#)))...)))).)))))))))).	1737	1759	0.9807692307692307	-28.3	1	0.01682703	0.368	0.0	0.0	-8.448053637813192	17	22	10	3UTR	MIRT467734	0	0
hsa-miR-1228-5p	NM_001367990	MDM2	GTGGGCGGGGGCAGGTGTGTG#GCACCCTGTCACCACGCCCCGCT#(((((((((((((((.((((.#)))))))))).)).))))).)).	6610	6633	1.0	-29.9	1	0.09401608	0.515	0.0	0.0	-4.1706235265052785	19	23	10	3UTR	MIRT761445	0	0
hsa-miR-1228-5p	XM_024450656	ZNF652	GTGGGCGGGGGCAGGTGTGTG#CACACATTCAAGGGAGTTCCTGCCCCTGAGAAGTGTTCCCATA#(((((((((((((((((((((#))))))............)))))))))).........))))).	8489	8532	1.0	-30.8	1	0.0008861212	0.5	0.0	0.0	-3.937574446201665	21	43	10	3UTR	MIRT697296	0	0
hsa-miR-1228-5p	XM_024450656	ZNF652	GTGGGCGGGGGCAGGTGTGTG#GCCCTGTTCCCATGTGCCCACT#(((((((((((((((.((...#)))))))))))....)))))).	7489	7511	1.0	-28.6	1	0.04637082	0.485	0.0	0.0	-4.1706235265052785	17	22	11	3UTR	MIRT697296	0	0
hsa-miR-1228-5p	XM_047418558	AFG1L	GTGGGCGGGGGCAGGTGTGTG#CACTGTTGTAGACACTTGCTCTCCTTGCAGCATGCTGCCCCCGCCCT#..(((((((((((.((((((.#.))))))))))))))))).	1933	1980	1.0	-34.7	1	0.009694579	0.382	0.0	0.0	-5.813840636892696	17	19	17	3UTR	MIRT560479	0	0
hsa-miR-1228-5p	XM_047427262	NRIP3	GTGGGCGGGGGCAGGTGTGTG#ACTTGTCCCTTGGTCTACA#((((((((((((((((.....#))))))))))..)))))).	503	522	1.0	-23.5	1	0.001884674	0.574	0.0	0.0	-3.937574446201665	16	19	10	3UTR	MIRT783174	0	0
hsa-miR-1228-5p	NM_181825	NF2	GTGGGCGGGGGCAGGTGTGTG#GCTTGCCTGTCTCTGTCCTCG#(.((((((((((((((..((.#))..)))))))))))))).).	2216	2237	1.0	-27.6	1	0.0007722703	0.412	0.0	0.0	-5.101250328216836	17	21	14	3UTR	MIRT736184	0	0
hsa-miR-1228-5p	NM_181828	NF2	GTGGGCGGGGGCAGGTGTGTG#GCACGCCTGCCGGCTTCTCATCGTCAGGGAGCCCGCCCAG#.(((((((((((((((((((.#)))))))))))....................)))))))).	2565	2605	1.0	-36.7	1	5.058272e-06	0.309	-0.028247287179487185	-0.011902336250000027	-3.793324837357118	19	40	11	3UTR	MIRT736184	0	0
hsa-miR-1228-5p	NM_181832	NF2	GTGGGCGGGGGCAGGTGTGTG#GCACGCCTGCCGGCTTCTCATCGTCAGGGAGCCCGCCCAG#.(((((((((((((((((((.#)))))))))))....................)))))))).	2706	2746	1.0	-36.7	1	5.058272e-06	0.309	0.0	0.0	-3.793324837357118	19	40	11	3UTR	MIRT736184	0	0
hsa-miR-1228-5p	NM_183006	DLGAP4	GTGGGCGGGGGCAGGTGTGTG#CTCTCTCCTGCCCCCGCATCCCACT#(((((((((((((((.(.(.(#).).).)))))))))))...)))).	3352	3377	1.0	-31.7	1	0.02901135	0.397	0.7313394999999999	0.4783778137499999	-4.1706235265052785	18	25	11	3UTR	MIRT478082	0	0
hsa-miR-1228-5p	NM_001371487	MAPKAPK5	GTGGGCGGGGGCAGGTGTGTG#CACCTTCCTGAGTAGCTGAGATTACAGGCGCCTGCCACCACGCCCCGCT#((((((((((((((((((.((#.)).))))))))).)).))))).)).	6848	6897	1.0	-35.8	1	2.942721e-05	0.485	0.0	0.0	-3.937574446201665	20	26	9	3UTR	MIRT783173	0	0
hsa-miR-1228-5p	NM_001372050	THY1	GTGGGCGGGGGCAGGTGTGTG#GCACTTCCTCCCCTCGCCCATC#(((((((((((.(((.((((.#))))..))).))))))))))).	1459	1481	1.0	-31.3	1	0.1333136	0.368	0.0	0.0	-7.517426836101634	18	22	11	3UTR	MIRT490392	0	0
hsa-miR-1228-5p	NM_014417	BBC3	GTGGGCGGGGGCAGGTGTGTG#CGCCCGCCTCTGCCGCCCACC#((((((((.((.(((((.(((#))).))))))).)))))))).	1154	1175	1.0	-31.4	1	0.001472018	0.324	0.8641487125	0.9027485612499999	-8.340767414043784	18	21	8	3UTR	MIRT480994	0	0
hsa-miR-1228-5p	NM_014897	ZNF652	GTGGGCGGGGGCAGGTGTGTG#CACACATTCAAGGGAGTTCCTGCCCCTGAGAAGTGTTCCCATA#(((((((((((((((((((((#))))))............)))))))))).........))))).	8966	9009	1.0	-30.8	1	0.0008861212	0.5	1.9549260809523805	1.6033492475000004	-3.937574446201665	21	43	10	3UTR	MIRT697296	0	0
hsa-miR-1228-5p	NM_014897	ZNF652	GTGGGCGGGGGCAGGTGTGTG#GCCCTGTTCCCATGTGCCCACT#(((((((((((((((.((...#)))))))))))....)))))).	7966	7988	1.0	-28.6	1	0.04637082	0.485	0.3241013568421053	0.456954642	-4.1706235265052785	17	22	11	3UTR	MIRT697296	0	0
hsa-miR-1228-5p	NM_014897	ZNF652	GTGGGCGGGGGCAGGTGTGTG#GCTCACTGCAACCCCCGCCCC#..(((((((((..((((.((.#)).))))....))))))))).	4667	4688	1.0	-28.6	1	0.0002741395	0.368	-0.07477322666666669	0.24858179725000001	-9.592934641634889	15	21	9	3UTR	MIRT697296	0	0
hsa-miR-1228-5p	NM_001278462	MDM2	GTGGGCGGGGGCAGGTGTGTG#ATCCGCCTGCCTCTGCCTC#..(((((((((((((((.((.#)).))))))))))))))).	10133	10152	1.0	-30.3	1	0.001969093	0.426	0.0	0.0	-4.95700071937229	17	19	15	3UTR	MIRT761445	0	0
hsa-miR-1228-5p	NM_018385	LSG1	GTGGGCGGGGGCAGGTGTGTG#CGCGCACCTGTAATCCCAGCTACT#((((..(((((((((((((((#)))))))))))..))))..)))).	2310	2334	1.0	-29.1	0	0.0002203392	0.382	2.356656411764706	1.1157071625000003	-9.957570382207184	19	24	11	3UTR	MIRT518923	0	0
hsa-miR-1228-5p	NM_024620	ZNF329	GTGGGCGGGGGCAGGTGTGTG#ACTCCTGACCTCATGATCCGCCCACC#(((((((((((((((.((...#)).)))).)))......)))))))).	2452	2478	1.0	-26.8	1	0.08852672	0.441	1.1525913636363634	0.8073608524999997	-4.1706235265052785	17	26	8	3UTR	MIRT761446	0	0
hsa-miR-1228-5p	NM_001145340	MDM2	GTGGGCGGGGGCAGGTGTGTG#ATCCGCCTGCCTCTGCCTC#..(((((((((((((((.((.#)).))))))))))))))).	10055	10074	1.0	-30.3	1	0.001969093	0.426	-0.45937015999999986	0.0508327625	-4.95700071937229	17	19	15	3UTR	MIRT761445	0	0
hsa-miR-1228-5p	NM_005652	TERF2	GTGGGCGGGGGCAGGTGTGTG#CCTGCCCCCTGTCCC#..(((((((((((((......#))))))))).)))).	2651	2666	1.0	-27.3	1	0.2724678	0.5	2.5125938571428574	1.7232001937500003	-5.1900497996759025	13	15	9	3UTR	MIRT698647	0	0
hsa-miR-1228-5p	NM_006288	THY1	GTGGGCGGGGGCAGGTGTGTG#GCACTTCCTCCCCTCGCCCATC#(((((((((((.(((.((((.#))))..))).))))))))))).	1510	1532	1.0	-31.3	1	0.1333136	0.368	-0.5974140818181818	0.06644162974999997	-7.517426836101634	18	22	11	3UTR	MIRT490392	0	0
hsa-miR-1228-5p	NM_006606	RBBP9	GTGGGCGGGGGCAGGTGTGTG#CACCTCTGACACTTGCCCCTAAGTCCT#..((((((((((((((((...#.))))))))))))..)))).	1110	1137	1.0	-28.5	1	0.001867304	0.471	-0.04417488888888891	0.006157131249999975	-4.95700071937229	16	20	12	3UTR	MIRT673409	0	0
hsa-miR-1228-5p	NM_012101	TRIM29	GTGGGCGGGGGCAGGTGTGTG#CGCATGGTATCAGCCTGCCTCTCCCGCCCACG#(((((((((((((((((((((#))))).......)))))))...))))))))).	2189	2221	1.0	-36.2	1	0.02607683	0.382	4.266919222580644	4.004860235	-3.937574446201665	21	32	9	3UTR	MIRT569601	0	0
hsa-miR-1228-5p	NM_001831	CLU	GTGGGCGGGGGCAGGTGTGTG#GCATTTCCTGTCCACCGCCG#...((((((((((((.((((.#))))..))))))).))))).	2222	2242	1.0	-28.2	0	0.005498282	0.5	3.84414492	4.494226348999998	-6.747589273982352	16	20	7	3UTR	MIRT736182	0	0
hsa-miR-1228-5p	NM_002392	MDM2	GTGGGCGGGGGCAGGTGTGTG#GCACCCTGTCACCACGCCCCGCT#(((((((((((((((.((((.#)))))))))).)).))))).)).	6855	6878	1.0	-29.9	1	0.09401608	0.515	0.0	0.0	-4.1706235265052785	19	23	10	3UTR	MIRT761445	0	0
hsa-miR-1228-5p	NM_002415	MIF	GTGGGCGGGGGCAGGTGTGTG#CACGCTGTCTGCGCTGGCTCCACCCGGGAACCCGCCGCACGCTGTGTTCTAGGCCCGCCCACC#(((((((((((((((((((((#.)))))))).)))).....))))))))).	454	517	1.0	-31.9	1	0.0001929017	0.353	1.5879976570370369	1.5399064292499998	-3.937574446201665	21	29	9	3UTR	MIRT734321	0	0
hsa-miR-1228-5p	NM_002538	OCLN	GTGGGCGGGGGCAGGTGTGTG#ACAATTCTCCTGCCTCGGCCTC#..((((.((((((((..(((.#))).....)))))))).)))).	3443	3465	1.0	-25.2	0	4.302834e-05	0.382	0.5420988874999999	0.19630242800000003	-6.733736334547221	15	22	8	3UTR	MIRT790052	0	0
hsa-miR-1228-5p	NM_003668	MAPKAPK5	GTGGGCGGGGGCAGGTGTGTG#CACCTTCCTGAGTAGCTGAGATTACAGGCGCCTGCCACCACGCCCCGCT#((((((((((((((((((.((#.)).))))))))).)).))))).)).	7145	7194	1.0	-35.8	1	2.942721e-05	0.485	0.0	0.0	-3.937574446201665	20	26	9	3UTR	MIRT783173	0	0
hsa-miR-1228-5p	XM_011537585	SLC36A1	GTGGGCGGGGGCAGGTGTGTG#GCATCTGCCCCTGCTGGGTGCACA#((((((((((((((((((...#))))))))))))))).....))).	5172	5196	1.0	-31.6	1	2.180596e-05	0.456	0.0	0.0	-3.937574446201665	18	24	15	3UTR	MIRT467734	0	0
hsa-miR-1228-5p	XM_011537585	SLC36A1	GTGGGCGGGGGCAGGTGTGTG#CAGACCTGTGTCCTGCCCATG#((((((((((((((((.((..#)).)))))).)))))))))).	3873	3894	1.0	-30.2	1	5.96419e-05	0.441	0.0	0.0	-3.937574446201665	18	21	10	3UTR	MIRT467734	0	0
hsa-miR-1228-5p	XM_011537585	SLC36A1	GTGGGCGGGGGCAGGTGTGTG#ACAGGGCTGCCATCGCTCACC#((((((((.(((((.(.(((.#))).).))))).)))))))).	1926	1947	1.0	-28.2	1	0.00387486	0.485	0.0	0.0	-5.729413664698063	17	21	8	3UTR	MIRT467734	0	0
hsa-miR-1228-5p	NM_078483	SLC36A1	GTGGGCGGGGGCAGGTGTGTG#CAGACCTGTGTCCTGCCCATG#((((((((((((((((.((..#)).)))))).)))))))))).	3801	3822	1.0	-30.2	1	5.96419e-05	0.441	-0.18287391764705882	-0.20703751999999997	-3.937574446201665	18	21	10	3UTR	MIRT467734	0	0
hsa-miR-1228-5p	NM_078483	SLC36A1	GTGGGCGGGGGCAGGTGTGTG#GCAGCTGCCTACCCCTGCCCCA#(.(((((((((.((((.(((.#)))...)))).)))))))))).	1665	1687	1.0	-28.3	1	0.01682703	0.368	-0.2537791555555556	0.57128645875	-8.448053637813192	17	22	10	3UTR	MIRT467734	0	0
hsa-miR-1228-5p	NM_079834	SCAMP4	GTGGGCGGGGGCAGGTGTGTG#CAGGTCCTGCCCCCGGCCAG#.(((.(((((((((((.((..#)).).)))))))))).))).	2304	2324	1.0	-32.5	0	0.0001192382	0.309	-0.5344861666666668	-0.9705867699999998	-7.91236201216959	16	20	10	3UTR	MIRT736185	0	0
hsa-miR-1228-5p	NM_139078	MAPKAPK5	GTGGGCGGGGGCAGGTGTGTG#CACCTTCCTGAGTAGCTGAGATTACAGGCGCCTGCCACCACGCCCCGCT#((((((((((((((((((.((#.)).))))))))).)).))))).)).	7151	7200	1.0	-35.8	1	2.942721e-05	0.485	0.026810138095238106	-0.15787068999999998	-3.937574446201665	20	26	9	3UTR	MIRT783173	0	0
hsa-miR-1228-5p	NM_145315	AFG1L	GTGGGCGGGGGCAGGTGTGTG#CACTGTTGTAGACACTTGCTCTCCTTGCAGCATGCTGCCCCCGCCCT#..(((((((((((.((((((.#.))))))))))))))))).	2318	2365	1.0	-34.7	1	0.009694579	0.382	-1.2546806636363639	-0.45027908354999996	-5.813840636892696	17	19	17	3UTR	MIRT560479	0	0
hsa-miR-1228-5p	NM_001311162	THY1	GTGGGCGGGGGCAGGTGTGTG#GCACTTCCTCCCCTCGCCCATC#(((((((((((.(((.((((.#))))..))).))))))))))).	1538	1560	1.0	-31.3	1	0.1333136	0.368	0.0450074090909091	-0.02578853725000002	-7.517426836101634	18	22	11	3UTR	MIRT490392	0	0
hsa-miR-1228-5p	NM_001329540	SCAMP4	GTGGGCGGGGGCAGGTGTGTG#CAGGTCCTGCCCCCGGCCAG#.(((.(((((((((((.((..#)).).)))))))))).))).	2202	2222	1.0	-32.5	0	0.0001192382	0.309	-0.5344861666666668	-0.9705867699999998	-7.91236201216959	16	20	10	3UTR	MIRT736185	0	0
hsa-miR-1228-5p	NM_000906	NPR1	GTGGGCGGGGGCAGGTGTGTG#CACGCACCTGCTCTCCACCTG#..(((.(((((((((((((((#))))))))))))).)).))).	3852	3873	1.0	-31.8	0	0.000103316	0.338	0.0	0.0	-6.857959480565336	18	21	13	3UTR	MIRT674772	0	0
hsa-miR-1228-5p	NM_001042486	DLGAP4	GTGGGCGGGGGCAGGTGTGTG#CTCTCTCCTGCCCCCGCATCCCACT#(((((((((((((((.(.(.(#).).).)))))))))))...)))).	2590	2615	1.0	-31.7	1	0.02901135	0.397	0.0	0.0	-4.1706235265052785	18	25	11	3UTR	MIRT478082	0	0
hsa-miR-1228-5p	NM_001042486	DLGAP4	GTGGGCGGGGGCAGGTGTGTG#CACCCCCCTCCCCCCGCCCCGCA#(((((((((((.(((.(.(((#))).).))).))))))))).)).	2496	2519	1.0	-30.6	1	0.2498463	0.368	0.0	0.0	-7.517426836101634	18	23	9	3UTR	MIRT478082	0	0
hsa-miR-128-3p	NM_015617	PYGO1	TCACAGTGAACCGGTCTCTTT#ATTTTTAGTAGAGACGGGTTCACCATGTT#..((((((((((.((((((..#.)))))).)))))))..))).	4629	4658	0.9615384615384616	-22.7	1	0.001808095	0.559	0.6144600416666667	0.508581914	-6.246131332038532	16	21	7	3UTR	MIRT021950	0	0
hsa-miR-128-3p	NM_020444	KIAA1191	TCACAGTGAACCGGTCTCTTT#GATGACTGGTGCTGTGC#.((((((..(((((((((...#)).))))))))))))).	1983	2000	0.9615384615384616	-19.1	1	0.00171094	0.456	3.8702837599999995	3.1603660700000002	-7.163349424783512	15	17	13	3UTR	MIRT459872	0	1
hsa-miR-128-3p	NM_004755	RPS6KA5	TCACAGTGAACCGGTCTCTTT#AAGAGGCTGGTCATGTGAA#(((((.((.(((((((((((.#)))))))))))))))))).	7630	7649	0.9615384615384616	-23.1	0	0.02930672	0.647	0.0	0.0	-6.894922865640474	18	19	18	3UTR	MIRT022082	1	1
hsa-miR-128-3p	NM_001079685	KIAA1191	TCACAGTGAACCGGTCTCTTT#GATGACTGGTGCTGTGC#.((((((..(((((((((...#)).))))))))))))).	1875	1892	0.9615384615384616	-19.1	1	0.00171094	0.456	2.8095448	2.3198719262499994	-7.163349424783512	15	17	13	3UTR	MIRT459872	0	1
hsa-miR-128-3p	NM_001322237	RPS6KA5	TCACAGTGAACCGGTCTCTTT#AAGAGGCTGGTCATGTGAA#(((((.((.(((((((((((.#)))))))))))))))))).	7427	7446	0.9615384615384616	-23.1	0	0.02930672	0.647	0.2791918090909091	0.12363377500000003	-6.894922865640474	18	19	18	3UTR	MIRT022082	1	1
hsa-miR-128-3p	NM_001400328	SEC61A1	TCACAGTGAACCGGTCTCTTT#GGGGGCTGACCCCAGCTTCCAGGGGACTGTCACTGTGGA#(((((((((..(((((((((.#.)))))))))))))))))).	3611	3650	0.9692307692307692	-24.1	1	0.0008931176	0.426	0.0	0.0	-8.004855389940193	18	20	18	3UTR	MIRT022079	1	1
hsa-miR-128-3p	NM_001400329	SEC61A1	TCACAGTGAACCGGTCTCTTT#GGGGGCTGACCCCAGCTTCCAGGGGACTGTCACTGTGGA#(((((((((..(((((((((.#.)))))))))))))))))).	3396	3435	0.9692307692307692	-24.1	1	0.0008931176	0.426	0.0	0.0	-8.004855389940193	18	20	18	3UTR	MIRT022079	1	1
hsa-miR-128-3p	NM_001330655	DDAH1	TCACAGTGAACCGGTCTCTTT#TTGGTTCCTGTGAA#((((((.(((((((.......#))))))))))))).	1079	1093	1.0	-17.4	0	0.003312095	0.603	0.6709266428571429	0.48381593	-6.449759621627232	13	14	13	3UTR	MIRT538157	1	0
hsa-miR-128-3p	NM_001348800	ZBTB20	TCACAGTGAACCGGTCTCTTT#AGAGATCATAGTAGCTCTTGGCCTTAGAAAGACTTGGGTTTGCTGTGT#.((((((((((((((((....#.)))))..))))))))))).	7309	7357	1.0	-20.7	1	0.001750154	0.647	0.0	0.0	-3.793324837357118	16	20	11	3UTR	MIRT498022	1	1
hsa-miR-128-3p	NM_001348803	ZBTB20	TCACAGTGAACCGGTCTCTTT#AGAGATCATAGTAGCTCTTGGCCTTAGAAAGACTTGGGTTTGCTGTGT#.((((((((((((((((....#.)))))..))))))))))).	7432	7480	1.0	-20.7	1	0.001750154	0.647	0.0	0.0	-3.793324837357118	16	20	11	3UTR	MIRT498022	1	1
hsa-miR-128-3p	NM_001356429	TUSC3	TCACAGTGAACCGGTCTCTTT#AGGAGACTGGACTGCTGTT#..((((((..((((((((((.#))))))))))..)))))).	2057	2076	1.0	-20.4	1	6.604109e-05	0.544	0.0	0.0	-7.255896845946231	16	19	10	3UTR	MIRT022014	0	0
hsa-miR-128-3p	NM_001363660	PSPC1	TCACAGTGAACCGGTCTCTTT#AGAGACGGGGTTTCACTGTGT#.(((((((((((.((((((..#)))))).))..))))))))).	2102	2123	1.0	-24.9	1	0.0003907725	0.588	0.0	0.0	-5.08245545002336	17	21	9	3UTR	MIRT470117	0	1
hsa-miR-128-3p	NM_001364716	MPRIP	TCACAGTGAACCGGTCTCTTT#AGAGGCTGGTTTAGTGTA#..(((.(((((((((((((..#))))))))))))).))).	10113	10131	1.0	-23.6	0	0.0001282054	0.412	0.0	0.0	-6.857959480565336	16	18	13	3UTR	MIRT626149	0	0
hsa-miR-128-3p	NM_001367806	PYGO1	TCACAGTGAACCGGTCTCTTT#AGAGACGGGTTCACCATGTT#..((((((((((.((((((..#)))))).)))))))..))).	4981	5001	1.0	-22.3	1	0.001808095	0.559	0.0	0.0	-6.246131332038532	16	20	7	3UTR	MIRT021950	0	0
hsa-miR-128-3p	NM_001367856	PROSER3	TCACAGTGAACCGGTCTCTTT#AGAGACGGGGTTTCACTGTGT#.(((((((((((.((((((..#)))))).))..))))))))).	3160	3181	1.0	-24.9	1	0.0003995528	0.574	0.0	0.0	-5.08245545002336	17	21	9	3UTR	MIRT762178	0	0
hsa-miR-128-3p	NM_001367856	PROSER3	TCACAGTGAACCGGTCTCTTT#AGTTACTGGTTATCTGTGAG#((((((..(((((((..((..#))..)))))))..)))))).	2266	2286	1.0	-19.9	0	0.001824081	0.618	0.0	0.0	-8.027944990557229	15	20	7	3UTR	MIRT762178	0	0
hsa-miR-128-3p	XM_017016834	MYPN	TCACAGTGAACCGGTCTCTTT#AAGGAATTTTTAGACTTAAGTTCACTGTGAT#(((((((((((.(((((....#.)))))...))))))))))).	5209	5240	1.0	-22.5	1	0.03241124	0.618	0.0	0.0	-7.284377755798021	16	21	11	3UTR	MIRT021986	0	0
hsa-miR-128-3p	XM_017016834	MYPN	TCACAGTGAACCGGTCTCTTT#AAGAGAGCGGACTGTGGA#(((((((...(((.((((((.#)))))).)))))))))).	4083	4101	1.0	-21.3	1	0.01279889	0.471	0.0	0.0	-9.406945419476644	16	18	10	3UTR	MIRT021986	0	0
hsa-miR-128-3p	XM_017021288	ARHGAP5	TCACAGTGAACCGGTCTCTTT#GGGACCTTGAACTGTGAA#(((((((.....((((((...#))))))....))))))).	9323	9341	1.0	-19.3	1	0.001752996	0.647	0.0	0.0	-14.721683286962943	13	18	7	3UTR	MIRT021887	0	0
hsa-miR-128-3p	XM_047445583	SOS1	TCACAGTGAACCGGTCTCTTT#AGGAGACCACTTCACTGTGC#.(((((((((..((((((((.#))))))))..))))))))).	6033	6053	1.0	-25.0	1	0.0001177304	0.529	0.0	0.0	-9.964902622363823	17	20	9	3UTR	MIRT699015	1	1
hsa-miR-128-3p	XM_047445584	SOS1	TCACAGTGAACCGGTCTCTTT#AGGAGACCACTTCACTGTGC#.(((((((((..((((((((.#))))))))..))))))))).	5988	6008	1.0	-25.0	1	0.0001177304	0.529	0.0	0.0	-9.964902622363823	17	20	9	3UTR	MIRT699015	1	1
hsa-miR-128-3p	XM_047445585	SOS1	TCACAGTGAACCGGTCTCTTT#AGGAGACCACTTCACTGTGC#.(((((((((..((((((((.#))))))))..))))))))).	5306	5326	1.0	-25.0	1	0.0001177304	0.529	0.0	0.0	-9.964902622363823	17	20	9	3UTR	MIRT699015	1	1
hsa-miR-128-3p	NM_152608	SDE2	TCACAGTGAACCGGTCTCTTT#GGAGACTGGGTTTCACTGTGT#.((((((((((((((((((..#)))))))))..))))))))).	2045	2066	1.0	-27.0	1	0.0008176743	0.618	-0.21651653499999993	-0.019417851250000014	-3.793324837357118	18	21	9	3UTR	MIRT336554	0	0
hsa-miR-128-3p	NM_153693	HOXC6	TCACAGTGAACCGGTCTCTTT#GTGACCGTTTCTGTGTGAA#(((((..(((.(((((.(...#).))))).)))..))))).	1769	1788	1.0	-18.0	0	0.00257169	0.647	3.9589936000000003	3.0547042374999993	-10.206994217676382	14	19	5	3UTR	MIRT021916	1	1
hsa-miR-128-3p	NM_173495	PTCHD1	TCACAGTGAACCGGTCTCTTT#GAGGGGATTGGTTTTACTGTT#..(((((((((((((((((((#)))))))))))))).))))).	4931	4952	1.0	-22.3	1	0.0004528007	0.676	0.0	0.0	-4.95700071937229	19	21	14	3UTR	MIRT021976	1	0
hsa-miR-128-3p	NM_173557	RNF152	TCACAGTGAACCGGTCTCTTT#GAAGAGGTAGGTTCTACTGTA#..((((((((((..(((((((#)))))))..))))).))))).	6728	6749	1.0	-20.4	1	0.001649518	0.721	0.0	0.0	-7.102971249558938	17	21	7	3UTR	MIRT534668	0	0
hsa-miR-128-3p	NM_173557	RNF152	TCACAGTGAACCGGTCTCTTT#AGGCCTGTTCCTGTGGA#((((((.((((.(((((....#))))).)))))))))).	8024	8041	1.0	-19.7	0	0.003006591	0.544	0.0	0.0	-8.82806429066934	15	17	10	3UTR	MIRT534668	0	0
hsa-miR-128-3p	NM_173827	COX18	TCACAGTGAACCGGTCTCTTT#GAGATGGAGTCTCACTGTGT#.(((((((((((.(((((...#))))).).)).)))))))).	1757	1777	1.0	-21.5	1	0.0002487807	0.544	0.6839048461538462	0.2543876087499999	-5.08245545002336	16	20	8	3UTR	MIRT635684	0	1
hsa-miR-128-3p	NM_173827	COX18	TCACAGTGAACCGGTCTCTTT#ACCTTGTTTACTGTGAG#(((((((((((.(((......#)))..))))))))))).	4486	4503	1.0	-17.5	1	0.01528375	0.691	0.0	0.0	-7.517426836101634	14	17	11	3UTR	MIRT635684	0	1
hsa-miR-128-3p	NM_177532	RASSF6	TCACAGTGAACCGGTCTCTTT#GAAGAAATGGAGAGCAGCAATTGGAGCTTCAGGACCGGCTTGCACTGTGGC#(((((((((((((((((....#.))))))).)).)))))))).	3284	3335	1.0	-24.0	1	7.496101e-05	0.441	0.0	0.0	-3.937574446201665	17	21	8	3UTR	MIRT021964	0	0
hsa-miR-128-3p	NM_177538	CYP20A1	TCACAGTGAACCGGTCTCTTT#GAGATGGAGTCTCGCTGTGT#.(((((((((((.(((((...#))))).).)).)))))))).	7544	7564	1.0	-21.1	1	0.0001903321	0.559	0.0	0.0	-5.08245545002336	16	20	8	3UTR	MIRT634742	0	0
hsa-miR-128-3p	NM_181453	GCC2	TCACAGTGAACCGGTCTCTTT#GGGAGGCTGAGGCTGGAGAATTGCTTGAGGCTAGTGAGCTGTGAC#(((((((..((.((((((...#.)))))).))..))))))).	5550	5595	1.0	-21.7	1	7.094055e-05	0.426	0.0	0.0	-10.654402343224413	15	20	7	3UTR	MIRT021983	1	1
hsa-miR-128-3p	NM_182688	UBE2G2	TCACAGTGAACCGGTCTCTTT#GGAGGCTGGGTGCTGTGGC#(((((((...(((((((((..#)))))))))..))))))).	2381	2400	1.0	-23.3	1	7.493917e-05	0.456	0.0	0.0	-8.550105501956237	16	19	9	3UTR	MIRT045887	0	0
hsa-miR-128-3p	NM_201274	MPRIP	TCACAGTGAACCGGTCTCTTT#AGAGGCTGGTTTAGTGTA#..(((.(((((((((((((..#))))))))))))).))).	6015	6033	1.0	-23.6	0	0.0001282054	0.412	0.0	0.0	-6.857959480565336	16	18	13	3UTR	MIRT626149	0	0
hsa-miR-128-3p	NM_201431	RASSF6	TCACAGTGAACCGGTCTCTTT#GAAGAAATGGAGAGCAGCAATTGGAGCTTCAGGACCGGCTTGCACTGTGGC#(((((((((((((((((....#.))))))).)).)))))))).	3328	3379	1.0	-24.0	1	7.496101e-05	0.441	-0.04129022105263161	0.14718822249999997	-3.937574446201665	17	21	8	3UTR	MIRT021964	0	0
hsa-miR-128-3p	NM_001369846	ZBTB37	TCACAGTGAACCGGTCTCTTT#GAGACCAGCCTGGCCAACATTGTGAA#((((((((..((((((((...#)))))).....))....)))))))).	13945	13971	1.0	-18.8	1	0.0741927	0.574	0.0	0.0	-6.236470572775607	16	26	8	3UTR	MIRT737013	1	0
hsa-miR-128-3p	NM_001370277	RGS6	TCACAGTGAACCGGTCTCTTT#GAGGAGACTTGGTCACTGTGAA#((((((((.((((((((((((#))))))))).))))))))))).	2176	2198	1.0	-27.8	1	1.026018e-05	0.485	0.0	0.0	-4.993964104447428	20	22	11	3UTR	MIRT715445	0	1
hsa-miR-128-3p	NM_001370287	RGS6	TCACAGTGAACCGGTCTCTTT#GAGGAGACTTGGTCACTGTGAA#((((((((.((((((((((((#))))))))).))))))))))).	2039	2061	1.0	-27.8	1	1.026018e-05	0.485	0.0	0.0	-4.993964104447428	20	22	11	3UTR	MIRT715445	0	1
hsa-miR-128-3p	NM_001370290	RGS6	TCACAGTGAACCGGTCTCTTT#GAGGAGACTTGGTCACTGTGAA#((((((((.((((((((((((#))))))))).))))))))))).	1657	1679	1.0	-27.8	1	1.026018e-05	0.485	0.0	0.0	-4.993964104447428	20	22	11	3UTR	MIRT715445	0	1
hsa-miR-128-3p	NM_001371695	CYP20A1	TCACAGTGAACCGGTCTCTTT#GAGATGGAGTCTCGCTGTGT#.(((((((((((.(((((...#))))).).)).)))))))).	7568	7588	1.0	-21.1	1	0.0001903321	0.559	0.0	0.0	-5.08245545002336	16	20	8	3UTR	MIRT634742	0	0
hsa-miR-128-3p	NM_001374747	GCNT2	TCACAGTGAACCGGTCTCTTT#ACTGGACACTGTGAA#((((((((..(((((......#))))).)))))))).	1902	1917	1.0	-17.7	1	0.003499448	0.618	0.0	0.0	-6.46951965307922	13	15	8	3UTR	MIRT021899	1	1
hsa-miR-128-3p	NM_001375812	NTRK3	TCACAGTGAACCGGTCTCTTT#GAGGGGACCTTGGGCATCACTGA#...((((((.(((((((((((#)))))))))..))...)))))).	6071	6094	1.0	-20.4	0	0.04442091	0.515	0.0	0.0	-7.757046662006918	17	23	9	3UTR	MIRT000340	0	1
hsa-miR-128-3p	NM_001382395	SOS1	TCACAGTGAACCGGTCTCTTT#AGGAGACCACTTCACTGTGC#.(((((((((..((((((((.#))))))))..))))))))).	6940	6960	1.0	-25.0	1	0.0001177304	0.529	0.0	0.0	-9.964902622363823	17	20	9	3UTR	MIRT699015	1	1
hsa-miR-128-3p	NM_001393393	ZBTB20	TCACAGTGAACCGGTCTCTTT#AGAGATCATAGTAGCTCTTGGCCTTAGAAAGACTTGGGTTTGCTGTGT#.((((((((((((((((....#.)))))..))))))))))).	6998	7046	1.0	-20.7	1	0.001750154	0.647	0.0	0.0	-3.793324837357118	16	20	11	3UTR	MIRT498022	1	1
hsa-miR-128-3p	NM_001395199	ZBTB37	TCACAGTGAACCGGTCTCTTT#GAGACCAGCCTGGCCAACATTGTGAA#((((((((..((((((((...#)))))).....))....)))))))).	13897	13923	1.0	-18.8	1	0.0741927	0.574	0.0	0.0	-6.236470572775607	16	26	8	3UTR	MIRT737013	1	0
hsa-miR-128-3p	NM_015079	TBC1D2B	TCACAGTGAACCGGTCTCTTT#AGAGACCCACTGTGT#.(((((((....(((((((..#)))))))))))))).	5901	5916	1.0	-19.9	1	0.0006045501	0.382	2.921767571428571	1.6812829787500003	-12.263798748937765	14	15	14	3UTR	MIRT466586	0	0
hsa-miR-128-3p	NM_016540	GPR83	TCACAGTGAACCGGTCTCTTT#AGAAAGGCCATTTCGCTGTGT#.(((((((((..(((((....#.)))))..))))))))).	2882	2903	1.0	-19.7	1	0.004628903	0.559	1.3992067777777777	1.74900985375	-9.964902622363823	14	18	9	3UTR	MIRT021958	0	0
hsa-miR-128-3p	NM_001199058	ARPIN-AP3S2	TCACAGTGAACCGGTCTCTTT#AGAGGGTGCCAGTCTCACTGTGGT#(((((((((((.(((((((((#)))))).))).)).))))))))).	5449	5473	1.0	-22.1	1	0.0005314022	0.426	1.4900521666666666	3.58802552375	-7.284377755798021	20	24	9	3UTR	MIRT515308	0	0
hsa-miR-128-3p	NM_001199155	KAT7	TCACAGTGAACCGGTCTCTTT#GAGGAGGCTGGGAATTGTATGTGCTGGAATGGTTTCACTCACTGTGAC#(((((((((.(((((((((((#)))))))))))...........................))))))))).	4044	4092	1.0	-25.0	1	2.75879e-05	0.544	0.06922269090909093	-0.03867072125000001	-5.180080914529843	20	48	11	3UTR	MIRT234479	1	1
hsa-miR-128-3p	NM_001199156	KAT7	TCACAGTGAACCGGTCTCTTT#GAGGAGGCTGGGAATTGTATGTGCTGGAATGGTTTCACTCACTGTGAC#(((((((((.(((((((((((#)))))))))))...........................))))))))).	3717	3765	1.0	-25.0	1	2.75879e-05	0.544	0.06922269090909093	-0.03867072125000001	-5.180080914529843	20	48	11	3UTR	MIRT234479	1	1
hsa-miR-128-3p	NM_001199157	KAT7	TCACAGTGAACCGGTCTCTTT#GAGGAGGCTGGGAATTGTATGTGCTGGAATGGTTTCACTCACTGTGAC#(((((((((.(((((((((((#)))))))))))...........................))))))))).	3804	3852	1.0	-25.0	1	2.75879e-05	0.544	0.06922269090909093	-0.03867072125000001	-5.180080914529843	20	48	11	3UTR	MIRT234479	1	1
hsa-miR-128-3p	NM_001199158	KAT7	TCACAGTGAACCGGTCTCTTT#GAGGAGGCTGGGAATTGTATGTGCTGGAATGGTTTCACTCACTGTGAC#(((((((((.(((((((((((#)))))))))))...........................))))))))).	3627	3675	1.0	-25.0	1	2.75879e-05	0.544	0.06922269090909093	-0.03867072125000001	-5.180080914529843	20	48	11	3UTR	MIRT234479	1	1
hsa-miR-128-3p	NM_001204416	RGS6	TCACAGTGAACCGGTCTCTTT#GAGGAGACTTGGTCACTGTGAA#((((((((.((((((((((((#))))))))).))))))))))).	1661	1683	1.0	-27.8	1	1.026018e-05	0.485	1.857660692307692	1.2881878649999998	-4.993964104447428	20	22	11	3UTR	MIRT715445	0	1
hsa-miR-128-3p	NM_001204419	RGS6	TCACAGTGAACCGGTCTCTTT#GAGGAGACTTGGTCACTGTGAA#((((((((.((((((((((((#))))))))).))))))))))).	1550	1572	1.0	-27.8	1	1.026018e-05	0.485	1.857660692307692	1.2881878649999998	-4.993964104447428	20	22	11	3UTR	MIRT715445	0	1
hsa-miR-128-3p	NM_001204423	RGS6	TCACAGTGAACCGGTCTCTTT#GAGGAGACTTGGTCACTGTGAA#((((((((.((((((((((((#))))))))).))))))))))).	1485	1507	1.0	-27.8	1	1.026018e-05	0.485	1.857660692307692	1.2881878649999998	-4.993964104447428	20	22	11	3UTR	MIRT715445	0	1
hsa-miR-128-3p	NM_001204424	RGS6	TCACAGTGAACCGGTCTCTTT#GAGGAGACTTGGTCACTGTGAA#((((((((.((((((((((((#))))))))).))))))))))).	2093	2115	1.0	-27.8	1	1.026018e-05	0.485	1.857660692307692	1.2881878649999998	-4.993964104447428	20	22	11	3UTR	MIRT715445	0	1
hsa-miR-128-3p	NM_001242466	PIK3R1	TCACAGTGAACCGGTCTCTTT#GAGCTGTCACTGTGGG#(((((((((..(((.(((...#))))))))))))))).	4657	4673	1.0	-18.4	1	9.288963e-05	0.574	2.7944026666666666	1.762995425	-8.74030495019083	15	16	15	3UTR	MIRT733521	1	1
hsa-miR-128-3p	NM_001256267	MYPN	TCACAGTGAACCGGTCTCTTT#AAGGAATTTTTAGACTTAAGTTCACTGTGAT#(((((((((((.(((((....#.)))))...))))))))))).	5409	5440	1.0	-22.5	1	0.03241124	0.618	0.06567672727272723	0.06418266	-7.284377755798021	16	21	11	3UTR	MIRT021986	0	0
hsa-miR-128-3p	NM_001256267	MYPN	TCACAGTGAACCGGTCTCTTT#AAGAGAGCGGACTGTGGA#(((((((...(((.((((((.#)))))).)))))))))).	4283	4301	1.0	-21.3	1	0.01279889	0.471	0.5502046142857143	0.9852582187500001	-9.406945419476644	16	18	10	3UTR	MIRT021986	0	0
hsa-miR-128-3p	NM_001270392	RASSF6	TCACAGTGAACCGGTCTCTTT#GAAGAAATGGAGAGCAGCAATTGGAGCTTCAGGACCGGCTTGCACTGTGGC#(((((((((((((((((....#.))))))).)).)))))))).	3196	3247	1.0	-24.0	1	7.496101e-05	0.441	0.31964214210526304	-0.21491041250000004	-3.937574446201665	17	21	8	3UTR	MIRT021964	0	0
hsa-miR-128-3p	NM_001277842	CCNT1	TCACAGTGAACCGGTCTCTTT#GAAGAGACTGGAGGGGCTGTGT#.((((((...(((((((((((#)))))))))))....)))))).	1599	1621	1.0	-24.9	1	3.191891e-05	0.485	0.8349378999999999	0.8239587187500002	-8.40585589311169	17	22	11	3UTR	MIRT762169	0	0
hsa-miR-128-3p	NM_001278742	TSPAN6	TCACAGTGAACCGGTCTCTTT#AGGGGGCCTTTGGAAGGCACTGTGAA#((((((((..((((((((((.#))))))))...))....)))))))).	1223	1249	1.0	-22.3	1	0.001142009	0.632	0.0	0.0	-6.236470572775607	18	26	8	3UTR	MIRT021978	0	0
hsa-miR-128-3p	NM_001278743	TSPAN6	TCACAGTGAACCGGTCTCTTT#AGGGGGCCTTTGGAAGGCACTGTGAA#((((((((..((((((((((.#))))))))...))....)))))))).	1247	1273	1.0	-22.3	1	0.001142009	0.632	0.0	0.0	-6.236470572775607	18	26	8	3UTR	MIRT021978	0	0
hsa-miR-128-3p	NM_001287335	KIAA1191	TCACAGTGAACCGGTCTCTTT#GATGACTGGTGCTGTGC#.((((((..(((((((((...#)).))))))))))))).	1609	1626	1.0	-19.1	1	0.00171094	0.456	2.1765014000000003	3.4039673899999996	-7.163349424783512	15	17	13	3UTR	MIRT459872	0	1
hsa-miR-128-3p	NM_001289155	MPI	TCACAGTGAACCGGTCTCTTT#AGAGATGGGGTTTCACTGTGT#.(((((((((((.((((((..#)))))).))..))))))))).	2088	2109	1.0	-24.1	1	0.003486948	0.588	-0.19914371538461537	-0.7655866062499999	-5.08245545002336	17	21	9	3UTR	MIRT783371	0	0
hsa-miR-128-3p	NM_001289156	MPI	TCACAGTGAACCGGTCTCTTT#AGAGATGGGGTTTCACTGTGT#.(((((((((((.((((((..#)))))).))..))))))))).	2169	2190	1.0	-24.1	1	0.003486948	0.588	0.0	0.0	-5.08245545002336	17	21	9	3UTR	MIRT783371	0	0
hsa-miR-128-3p	NM_001289157	MPI	TCACAGTGAACCGGTCTCTTT#AGAGATGGGGTTTCACTGTGT#.(((((((((((.((((((..#)))))).))..))))))))).	2114	2135	1.0	-24.1	1	0.003486948	0.588	-0.19914371538461537	-0.7655866062499999	-5.08245545002336	17	21	9	3UTR	MIRT783371	0	0
hsa-miR-128-3p	NM_020673	RAB22A	TCACAGTGAACCGGTCTCTTT#GAGAGGCCTATTGTGAT#((((((((....((((((((.#)))))))))))))))).	5300	5317	1.0	-18.5	1	0.004344171	0.603	-0.22261562499999998	0.489965765	-12.408048357782313	16	17	16	3UTR	MIRT045852	0	0
hsa-miR-128-3p	NM_020791	TAOK1	TCACAGTGAACCGGTCTCTTT#GGAGGTGGGTAGGAAGCTGTGAG#(((((((..(((.((((((..#)))))).))).....))))))).	5403	5426	1.0	-18.6	1	0.001883702	0.632	1.3120570285714286	0.9100266112500001	-8.596729646294301	16	23	7	3UTR	MIRT466633	1	0
hsa-miR-128-3p	NM_022754	SFXN1	TCACAGTGAACCGGTCTCTTT#AGAGACGGGGTTTCACTGTGGT#((((((((((((.((((((..#)))))).))..)))))))))).	2429	2451	1.0	-25.8	1	4.895313e-05	0.515	-0.00917422857142856	-0.045789122500000015	-5.226705058867908	18	22	10	3UTR	MIRT762181	0	0
hsa-miR-128-3p	NM_024423	DSC3	TCACAGTGAACCGGTCTCTTT#AGAGACGGGGTTTCACTGTGT#.(((((((((((.((((((..#)))))).))..))))))))).	4992	5013	1.0	-24.9	1	0.001117556	0.588	2.9632534923076914	2.7064004575	-5.08245545002336	17	21	9	3UTR	MIRT762171	0	0
hsa-miR-128-3p	NM_024620	ZNF329	TCACAGTGAACCGGTCTCTTT#AGAGACAGGGTTTCACTGTGT#.(((((((((((.((((((..#))))))..)))).))))))).	2413	2434	1.0	-24.1	1	0.001203363	0.574	0.22380658333333334	1.1408203725	-5.08245545002336	17	21	7	3UTR	MIRT683269	0	1
hsa-miR-128-3p	NM_024646	ZYG11B	TCACAGTGAACCGGTCTCTTT#AAGGAGCTGGTTTGTTAGTTCACTGATGAC#((((((((((((((.((((((#)))))))))))........)))))).))).	3841	3871	1.0	-20.2	1	0.001302648	0.721	0.3972826643478261	0.21514428200000002	-4.6730240064523	20	30	11	3UTR	MIRT648588	0	0
hsa-miR-128-3p	NM_025142	TAOK1	TCACAGTGAACCGGTCTCTTT#GGAGGTGGGTAGGAAGCTGTGAG#(((((((..(((.((((((..#)))))).))).....))))))).	4397	4420	1.0	-18.6	1	0.001883702	0.632	1.3120570285714286	0.9100266112500001	-8.596729646294301	16	23	7	3UTR	MIRT466633	1	0
hsa-miR-128-3p	NM_025146	NAA50	TCACAGTGAACCGGTCTCTTT#AGGAGACTGGCTATCACTGC#...((((((.((((((((((.#))))))))))...)))))).	4633	4653	1.0	-23.1	0	0.00156039	0.471	1.1196629	1.44935917875	-7.757046662006918	16	20	10	3UTR	MIRT472621	1	1
hsa-miR-128-3p	NM_001164343	ZBTB20	TCACAGTGAACCGGTCTCTTT#AGAGATCATAGTAGCTCTTGGCCTTAGAAAGACTTGGGTTTGCTGTGT#.((((((((((((((((....#.)))))..))))))))))).	7179	7227	1.0	-20.7	1	0.001750154	0.647	1.0551771472222222	1.003773555	-3.793324837357118	16	20	11	3UTR	MIRT498022	1	1
hsa-miR-128-3p	NM_001164346	ZBTB20	TCACAGTGAACCGGTCTCTTT#AGAGATCATAGTAGCTCTTGGCCTTAGAAAGACTTGGGTTTGCTGTGT#.((((((((((((((((....#.)))))..))))))))))).	6736	6784	1.0	-20.7	1	0.001750154	0.647	-0.0706188194444445	0.3071872487500001	-3.793324837357118	16	20	11	3UTR	MIRT498022	1	1
hsa-miR-128-3p	NM_001164347	ZBTB20	TCACAGTGAACCGGTCTCTTT#AGAGATCATAGTAGCTCTTGGCCTTAGAAAGACTTGGGTTTGCTGTGT#.((((((((((((((((....#.)))))..))))))))))).	6758	6806	1.0	-20.7	1	0.001750154	0.647	0.3554628305555555	0.226270965625	-3.793324837357118	16	20	11	3UTR	MIRT498022	1	1
hsa-miR-128-3p	NM_005126	NR1D2	TCACAGTGAACCGGTCTCTTT#GGGACTTGATTTACTGTGGC#(((((((((((.((((((...#)))))).).)))))))))).	3747	3767	1.0	-20.0	1	0.0001023423	0.691	1.9386520833333334	1.5150041925000002	-7.284377755798021	17	20	10	3UTR	MIRT120697	1	1
hsa-miR-128-3p	NM_005610	RBBP4	TCACAGTGAACCGGTCTCTTT#GAAGAGATTGTTACAGTGTGAT#(((((.((...((((((((((#))))))))))...)).))))).	3600	3622	1.0	-19.6	0	0.01026218	0.574	-0.09081515000000003	0.0181947125	-10.962203809379004	17	22	10	3UTR	MIRT673034	0	0
hsa-miR-128-3p	NM_005729	PPIF	TCACAGTGAACCGGTCTCTTT#CTGGTTACTGTGAA#((((((((.(((((.......#))))))))))))).	1274	1288	1.0	-17.4	1	0.008888136	0.485	1.421104125	0.019678716250000006	-5.962462745001676	13	14	13	3UTR	MIRT470531	1	1
hsa-miR-128-3p	NM_006933	SLC5A3	TCACAGTGAACCGGTCTCTTT#AGAGAGACTGGTCTTTCTCTTTGTCTTCCTTCACATTGCTGTGT#.((((((((((((((((((((#)))))))))))).......................)))))))).	6850	6894	1.0	-23.4	1	0.004730807	0.574	0.22432643720930234	-0.2795088587499999	-3.793324837357118	20	44	12	3UTR	MIRT022015	0	1
hsa-miR-128-3p	NM_007067	KAT7	TCACAGTGAACCGGTCTCTTT#GAGGAGGCTGGGAATTGTATGTGCTGGAATGGTTTCACTCACTGTGAC#(((((((((.(((((((((((#)))))))))))...........................))))))))).	4134	4182	1.0	-25.0	1	2.75879e-05	0.544	0.06922269090909093	-0.03867072125000001	-5.180080914529843	20	48	11	3UTR	MIRT234479	1	1
hsa-miR-128-3p	NM_012137	DDAH1	TCACAGTGAACCGGTCTCTTT#TTGGTTCCTGTGAA#((((((.(((((((.......#))))))))))))).	1370	1384	1.0	-17.4	0	0.003312095	0.603	0.06386714285714286	0.11898181875	-6.449759621627232	13	14	13	3UTR	MIRT538157	1	0
hsa-miR-128-3p	NM_012311	KIN	TCACAGTGAACCGGTCTCTTT#ACTTTTAGAGACATGGTCTCACTGTGT#.((((((((((((((((((..#.)))))).)))).)))))))).	2252	2279	1.0	-25.3	1	0.0002729854	0.574	0.10875544500000003	-0.13584449875000001	-3.793324837357118	18	22	8	3UTR	MIRT656865	0	0
hsa-miR-128-3p	NM_001941	DSC3	TCACAGTGAACCGGTCTCTTT#AGAGACGGGGTTTCACTGTGT#.(((((((((((.((((((..#)))))).))..))))))))).	4949	4970	1.0	-24.9	1	0.001117556	0.588	0.0	0.0	-5.08245545002336	17	21	9	3UTR	MIRT762171	0	0
hsa-miR-128-3p	NM_001949	E2F3	TCACAGTGAACCGGTCTCTTT#AGGGTGACCTGTTCTCTAGCTGTGAT#(((((((((((.((((.((((#)))).)))).))))....))))))).	4933	4959	1.0	-21.0	1	0.01007855	0.618	0.0	0.0	-7.284377755798021	19	26	7	3UTR	MIRT003734	1	1
hsa-miR-128-3p	NM_002227	JAK1	TCACAGTGAACCGGTCTCTTT#GAGAAAGCTGGTTCTACATGGGGGGATAGCTGTGGA#(((((((((((((((.((((.#))))..))))))))..............))))))).	4391	4427	1.0	-19.4	1	0.0006165929	0.603	3.0499456551724133	3.3324679725	-4.1706235265052785	19	36	8	3UTR	MIRT021877	0	0
hsa-miR-128-3p	NM_002240	KCNJ6	TCACAGTGAACCGGTCTCTTT#AAGAAATCTCACAAGGCCGGGTGCTGTGGC#(((((((...(((((((....#.)))))))..))))))).	9498	9528	1.0	-21.6	1	2.237256e-07	0.456	0.0	0.0	-8.550105501956237	14	18	7	3UTR	MIRT021940	1	0
hsa-miR-128-3p	NM_002306	LGALS3	TCACAGTGAACCGGTCTCTTT#GTTCACTGTGAG#(((((((((((..........#))))))))))).	868	880	1.0	-17.7	1	0.0002457011	0.691	0.0	0.0	-10.39884692653892	11	12	11	3UTR	MIRT734077	0	1
hsa-miR-128-3p	NM_002435	MPI	TCACAGTGAACCGGTCTCTTT#AGAGATGGGGTTTCACTGTGT#.(((((((((((.((((((..#)))))).))..))))))))).	2297	2318	1.0	-24.1	1	0.003486948	0.588	0.0	0.0	-5.08245545002336	17	21	9	3UTR	MIRT783371	0	0
hsa-miR-128-3p	NM_002530	NTRK3	TCACAGTGAACCGGTCTCTTT#GAGGGGACCTTGGGCATCACTGA#...((((((.(((((((((((#)))))))))..))...)))))).	6383	6406	1.0	-20.4	0	0.04442091	0.515	0.0	0.0	-7.757046662006918	17	23	9	3UTR	MIRT000340	0	1
hsa-miR-128-3p	NM_003281	TNNI1	TCACAGTGAACCGGTCTCTTT#GAGATGGAGTCTCGCTGTGT#.(((((((((((.(((((...#))))).).)).)))))))).	1851	1871	1.0	-21.1	1	0.0002000748	0.529	0.0	0.0	-5.08245545002336	16	20	8	3UTR	MIRT021876	0	0
hsa-miR-128-3p	NM_003343	UBE2G2	TCACAGTGAACCGGTCTCTTT#GGAGGCTGGGTGCTGTGGC#(((((((...(((((((((..#)))))))))..))))))).	2266	2285	1.0	-23.3	1	7.493917e-05	0.456	0.0	0.0	-8.550105501956237	16	19	9	3UTR	MIRT045887	0	0
hsa-miR-128-3p	NM_003343	UBE2G2	TCACAGTGAACCGGTCTCTTT#CTGGTTCCCTGTGGG#((((((.(((((((.......#))))))).)))))).	1022	1037	1.0	-18.5	0	1.156339e-05	0.412	2.097718857142857	1.9579085975000001	-6.449759621627232	13	15	7	3UTR	MIRT045887	0	0
hsa-miR-128-3p	NM_004230	S1PR2	TCACAGTGAACCGGTCTCTTT#GAGATGGAGTCTCACTGTGT#.(((((((((((.(((((...#))))).).)).)))))))).	2820	2840	1.0	-21.5	1	0.000466141	0.559	-0.1546064692307692	-0.145138104	-5.08245545002336	16	20	8	3UTR	MIRT632466	0	0
hsa-miR-128-3p	NM_004296	RGS6	TCACAGTGAACCGGTCTCTTT#GAGGAGACTTGGTCACTGTGAA#((((((((.((((((((((((#))))))))).))))))))))).	1607	1629	1.0	-27.8	1	1.026018e-05	0.485	0.39949644615384616	0.772937585	-4.993964104447428	20	22	11	3UTR	MIRT715445	0	1
hsa-miR-128-3p	NM_004612	TGFBR1	TCACAGTGAACCGGTCTCTTT#AAGAGACCAAGGTACATTTACCTCATTGTGT#.(((((((((((((((((((.#))))))))..))).........)))))))).	5475	5506	1.0	-21.4	1	0.007898872	0.676	0.0	0.0	-3.793324837357118	19	31	8	3UTR	MIRT004650	1	1
hsa-miR-128-3p	NM_004755	RPS6KA5	TCACAGTGAACCGGTCTCTTT#GGCTGGGCACTGTGGC#((((((((..((((((.....#)))))).)))))))).	13497	13513	1.0	-21.1	1	0.0004171808	0.515	0.0	0.0	-6.236470572775607	14	16	8	3UTR	MIRT022082	1	1
hsa-miR-128-3p	NM_203394	E2F7	TCACAGTGAACCGGTCTCTTT#AGACCAAAATAACTGTGAA#(((((((.....(((((....#)))))......))))))).	3613	3632	1.0	-16.0	1	0.1305395	0.618	2.4975085714285714	0.94962591875	-14.721683286962943	12	19	7	3UTR	MIRT022069	1	1
hsa-miR-128-3p	NM_206915	BEX3	TCACAGTGAACCGGTCTCTTT#GATCCGTTTGCTGTGAA#(((((((((((.((((.....#)))).))))))))))).	600	617	1.0	-19.7	1	0.04561628	0.603	2.082455	2.0875565549999995	-7.284377755798021	15	17	11	3UTR	MIRT472206	1	0
hsa-miR-128-3p	NM_206917	BEX3	TCACAGTGAACCGGTCTCTTT#GATCCGTTTGCTGTGAA#(((((((((((.((((.....#)))).))))))))))).	553	570	1.0	-19.7	1	0.04561628	0.603	1.5019938454545454	0.8382738700000001	-7.284377755798021	15	17	11	3UTR	MIRT472206	1	0
hsa-miR-128-3p	XM_005256564	MPRIP	TCACAGTGAACCGGTCTCTTT#AGAGGCTGGTTTAGTGTA#..(((.(((((((((((((..#))))))))))))).))).	5838	5856	1.0	-23.6	0	0.0001282054	0.412	0.0	0.0	-6.857959480565336	16	18	13	3UTR	MIRT626149	0	0
hsa-miR-128-3p	XM_005267635	ARHGAP5	TCACAGTGAACCGGTCTCTTT#GGGACCTTGAACTGTGAA#(((((((.....((((((...#))))))....))))))).	9326	9344	1.0	-19.3	1	0.001752996	0.647	0.0	0.0	-14.721683286962943	13	18	7	3UTR	MIRT021887	0	0
hsa-miR-128-3p	XM_005269379	PPIF	TCACAGTGAACCGGTCTCTTT#CTGGTTACTGTGAA#((((((((.(((((.......#))))))))))))).	1336	1350	1.0	-17.4	1	0.008888136	0.485	0.0	0.0	-5.962462745001676	13	14	13	3UTR	MIRT470531	1	1
hsa-miR-128-3p	XM_006712871	GCC2	TCACAGTGAACCGGTCTCTTT#GGGAGGCTGAGGCTGGAGAATTGCTTGAGGCTAGTGAGCTGTGAC#(((((((..((.((((((...#.)))))).))..))))))).	5474	5519	1.0	-21.7	1	7.094055e-05	0.426	0.0	0.0	-10.654402343224413	15	20	7	3UTR	MIRT021983	1	1
hsa-miR-128-3p	XM_006713451	NR1D2	TCACAGTGAACCGGTCTCTTT#GGGACTTGATTTACTGTGGC#(((((((((((.((((((...#)))))).).)))))))))).	3536	3556	1.0	-20.0	1	0.0001023423	0.691	0.0	0.0	-7.284377755798021	17	20	10	3UTR	MIRT120697	1	1
hsa-miR-128-3p	XM_011518948	TGFBR1	TCACAGTGAACCGGTCTCTTT#AAGAGACCAAGGTACATTTACCTCATTGTGT#.(((((((((((((((((((.#))))))))..))).........)))))))).	21973	22004	1.0	-21.4	1	0.007898872	0.676	0.0	0.0	-3.793324837357118	19	31	8	3UTR	MIRT004650	1	1
hsa-miR-128-3p	XM_011518949	TGFBR1	TCACAGTGAACCGGTCTCTTT#ACCTCTCAAGAGACCAAGGTACATTTACCTCATTGTGT#.(((((((((((((((((((.#.))))))))..))).........)))))))).	5347	5385	1.0	-21.9	1	0.007898872	0.676	0.0	0.0	-3.793324837357118	19	32	8	3UTR	MIRT004650	1	1
hsa-miR-128-3p	XM_011526530	PROSER3	TCACAGTGAACCGGTCTCTTT#AGAGACGGGGTTTCACTGTGT#.(((((((((((.((((((..#)))))).))..))))))))).	2965	2986	1.0	-24.9	1	0.0003995528	0.574	0.0	0.0	-5.08245545002336	17	21	9	3UTR	MIRT762178	0	0
hsa-miR-128-3p	XM_011526531	PROSER3	TCACAGTGAACCGGTCTCTTT#AGAGACGGGGTTTCACTGTGT#.(((((((((((.((((((..#)))))).))..))))))))).	2953	2974	1.0	-24.9	1	0.0003995528	0.574	0.0	0.0	-5.08245545002336	17	21	9	3UTR	MIRT762178	0	0
hsa-miR-128-3p	XM_011526535	PROSER3	TCACAGTGAACCGGTCTCTTT#AGAGACGGGGTTTCACTGTGT#.(((((((((((.((((((..#)))))).))..))))))))).	2686	2707	1.0	-24.9	1	0.0003995528	0.574	0.0	0.0	-5.08245545002336	17	21	9	3UTR	MIRT762178	0	0
hsa-miR-128-3p	NM_001079684	KIAA1191	TCACAGTGAACCGGTCTCTTT#GATGACTGGTGCTGTGC#.((((((..(((((((((...#)).))))))))))))).	1896	1913	1.0	-19.1	1	0.00171094	0.456	1.6752894999999999	2.41176723375	-7.163349424783512	15	17	13	3UTR	MIRT459872	0	1
hsa-miR-128-3p	NM_001111283	IGF1	TCACAGTGAACCGGTCTCTTT#AGAGATTGGTGAATTGA#...((((..((((((((((..#))))))))))..)))).	2146	2163	1.0	-17.8	0	0.02431061	0.603	1.8895712999999996	1.8095664725000007	-9.884564781105134	14	17	10	3UTR	MIRT733519	1	0
hsa-miR-128-3p	NM_001122770	ZBTB37	TCACAGTGAACCGGTCTCTTT#GAGACCAGCCTGGCCAACATTGTGAA#((((((((..((((((((...#)))))).....))....)))))))).	13894	13920	1.0	-18.8	1	0.0741927	0.574	0.0	0.0	-6.236470572775607	16	26	8	3UTR	MIRT737013	1	0
hsa-miR-128-3p	NM_001127671	LIFR	TCACAGTGAACCGGTCTCTTT#AAGGAGATTGGTCACATGTT#..((((((.((((((((((((#))))))))))))))).))).	6144	6164	1.0	-20.3	1	0.006152472	0.529	1.0291982583333334	-0.0719524675	-6.013390377618052	18	20	15	3UTR	MIRT022009	1	0
hsa-miR-128-3p	NM_001134445	DDAH1	TCACAGTGAACCGGTCTCTTT#TTGGTTCCTGTGAA#((((((.(((((((.......#))))))))))))).	1286	1300	1.0	-17.4	0	0.003312095	0.603	0.25557021428571425	0.39435539625000005	-6.449759621627232	13	14	13	3UTR	MIRT538157	1	0
hsa-miR-128-3p	NM_001135255	RBBP4	TCACAGTGAACCGGTCTCTTT#GAAGAGATTGTTACAGTGTGAT#(((((.((...((((((((((#))))))))))...)).))))).	3597	3619	1.0	-19.6	0	0.01026218	0.574	-0.09081515000000003	0.0181947125	-10.962203809379004	17	22	10	3UTR	MIRT673034	0	0
hsa-miR-128-3p	NM_001135256	RBBP4	TCACAGTGAACCGGTCTCTTT#GAAGAGATTGTTACAGTGTGAT#(((((.((...((((((((((#))))))))))...)).))))).	3562	3584	1.0	-19.6	0	0.01026218	0.574	-0.0746655	0.03636304374999996	-10.962203809379004	17	22	10	3UTR	MIRT673034	0	0
hsa-miR-128-3p	NM_032578	MYPN	TCACAGTGAACCGGTCTCTTT#AAGGAATTTTTAGACTTAAGTTCACTGTGAT#(((((((((((.(((((....#.)))))...))))))))))).	5349	5380	1.0	-22.5	1	0.03241124	0.618	0.18517819090909093	0.341464355	-7.284377755798021	16	21	11	3UTR	MIRT021986	0	0
hsa-miR-128-3p	NM_032578	MYPN	TCACAGTGAACCGGTCTCTTT#AAGAGAGCGGACTGTGGA#(((((((...(((.((((((.#)))))).)))))))))).	4223	4241	1.0	-21.3	1	0.01279889	0.471	1.2365663142857142	2.021236305	-9.406945419476644	16	18	10	3UTR	MIRT021986	0	0
hsa-miR-128-3p	NM_052875	VPS26B	TCACAGTGAACCGGTCTCTTT#AAGGAGTTGGTTCCTGTGT#.(((((.(((((((.((((((#)))))))))))))))))).	2862	2881	1.0	-21.6	0	0.001748807	0.588	0.6090252857142857	0.08786917125000004	-6.072460932479071	18	19	18	3UTR	MIRT737011	0	0
hsa-miR-128-3p	NM_001291430	BAX	TCACAGTGAACCGGTCTCTTT#GGGGATTGGGGGACGTGGG#((((.((...(((((((((..#)))))))))...)))))).	1114	1133	1.0	-16.4	0	0.1195754	0.515	0.0	0.0	-12.669142676768711	15	19	9	3UTR	MIRT437798	0	1
hsa-miR-128-3p	NM_001297732	COX18	TCACAGTGAACCGGTCTCTTT#GAGATGGAGTCTCACTGTGT#.(((((((((((.(((((...#))))).).)).)))))))).	1760	1780	1.0	-21.5	1	0.0002487807	0.544	-0.05409308692307691	0.12445137975000006	-5.08245545002336	16	20	8	3UTR	MIRT635684	0	1
hsa-miR-128-3p	NM_001297732	COX18	TCACAGTGAACCGGTCTCTTT#ACCTTGTTTACTGTGAG#(((((((((((.(((......#)))..))))))))))).	4489	4506	1.0	-17.5	1	0.01528375	0.691	0.11980763636363635	0.11621242125000002	-7.517426836101634	14	17	11	3UTR	MIRT635684	0	1
hsa-miR-128-3p	NM_001306199	SETD7	TCACAGTGAACCGGTCTCTTT#GGATCAGTTCATTGTGGG#(((((((((((.(((((....#))))).))))))))))).	3193	3211	1.0	-20.2	1	0.001897991	0.529	0.0	0.0	-7.284377755798021	16	18	11	3UTR	MIRT022071	1	1
hsa-miR-128-3p	NM_001308445	NAA50	TCACAGTGAACCGGTCTCTTT#AGGAGACTGGCTATCACTGC#...((((((.((((((((((.#))))))))))...)))))).	4630	4650	1.0	-23.1	0	0.00156039	0.471	1.2885721	1.47534490375	-7.757046662006918	16	20	10	3UTR	MIRT472621	1	1
hsa-miR-128-3p	NM_001322237	RPS6KA5	TCACAGTGAACCGGTCTCTTT#GGCTGGGCACTGTGGC#((((((((..((((((.....#)))))).)))))))).	13294	13310	1.0	-21.1	1	0.0004171808	0.515	-0.035346625	-0.08459127124999995	-6.236470572775607	14	16	8	3UTR	MIRT022082	1	1
hsa-miR-128-3p	NM_001330326	PYGO1	TCACAGTGAACCGGTCTCTTT#AGAGACGGGTTCACCATGTT#..((((((((((.((((((..#)))))).)))))))..))).	4202	4222	1.0	-22.3	1	0.001808095	0.559	-0.12888351333333334	0.19315022025	-6.246131332038532	16	20	7	3UTR	MIRT021950	0	0
hsa-miR-128-3p	NM_001330345	GPR83	TCACAGTGAACCGGTCTCTTT#AGAAAGGCCATTTCGCTGTGT#.(((((((((..(((((....#.)))))..))))))))).	2756	2777	1.0	-19.7	1	0.004628903	0.559	-0.0928700888888889	-0.02600383749999996	-9.964902622363823	14	18	9	3UTR	MIRT021958	0	0
hsa-miR-128-3p	NM_001330372	MPI	TCACAGTGAACCGGTCTCTTT#AGAGATGGGGTTTCACTGTGT#.(((((((((((.((((((..#)))))).))..))))))))).	2386	2407	1.0	-24.1	1	0.003486948	0.588	-0.19914371538461537	-0.7655866062499999	-5.08245545002336	17	21	9	3UTR	MIRT783371	0	0
hsa-miR-128-3p	NM_000618	IGF1	TCACAGTGAACCGGTCTCTTT#AGAGATTGGTGAATTGA#...((((..((((((((((..#))))))))))..)))).	2097	2114	1.0	-17.8	0	0.02431061	0.603	0.0	0.0	-9.884564781105134	14	17	10	3UTR	MIRT733519	1	0
hsa-miR-128-3p	NM_000676	ADORA2B	TCACAGTGAACCGGTCTCTTT#GGCTGGTTTTCATTGTGAA#((((((((((((((((.....#)))))))..))))))))).	1176	1195	1.0	-21.9	1	2.794477e-06	0.574	0.0	0.0	-3.937574446201665	16	19	9	3UTR	MIRT035581	1	0
hsa-miR-128-3p	NM_001001342	BLOC1S2	TCACAGTGAACCGGTCTCTTT#GAGGCTGATGAATTGTGAA#(((((((..(.(((((((...#))))))).)..))))))).	595	614	1.0	-18.3	1	0.00691496	0.647	0.47543861428571427	-0.004464409625000082	-10.132373509038409	15	19	7	3UTR	MIRT021994	0	0
hsa-miR-128-3p	NM_001012338	NTRK3	TCACAGTGAACCGGTCTCTTT#GAGGGGACCTTGGGCATCACTGA#...((((((.(((((((((((#)))))))))..))...)))))).	6425	6448	1.0	-20.4	0	0.04442091	0.515	0.0	0.0	-7.757046662006918	17	23	9	3UTR	MIRT000340	0	1
hsa-miR-128-3p	NM_001017420	ESCO2	TCACAGTGAACCGGTCTCTTT#AGAGGCATGGGTCTCACTGTGT#.(((((((((((.((((((..#))))))...))).)))))))).	2360	2382	1.0	-22.3	1	5.999523e-05	0.588	0.0	0.0	-5.08245545002336	17	22	8	3UTR	MIRT022088	0	0
hsa-miR-128-3p	NM_001017420	ESCO2	TCACAGTGAACCGGTCTCTTT#GAGAGACCATGGAACTGTGT#.((((((.....((((((((.#)))))))).....)))))).	2929	2949	1.0	-20.5	1	0.005174708	0.632	0.0	0.0	-14.577433678118396	14	20	8	3UTR	MIRT022088	0	0
hsa-miR-128-3p	NM_001030055	ARHGAP5	TCACAGTGAACCGGTCTCTTT#GGGACCTTGAACTGTGAA#(((((((.....((((((...#))))))....))))))).	9422	9440	1.0	-19.3	1	0.001752996	0.647	0.0	0.0	-14.721683286962943	13	18	7	3UTR	MIRT021887	0	0
hsa-miR-128-3p	NM_001039887	PROSER3	TCACAGTGAACCGGTCTCTTT#AGAGACGGGGTTTCACTGTGT#.(((((((((((.((((((..#)))))).))..))))))))).	2428	2449	1.0	-24.9	1	0.0003995528	0.574	0.0	0.0	-5.08245545002336	17	21	9	3UTR	MIRT762178	0	0
hsa-miR-128-3p	NM_001039887	PROSER3	TCACAGTGAACCGGTCTCTTT#AGTTACTGGTTATCTGTGAG#((((((..(((((((..((..#))..)))))))..)))))).	1534	1554	1.0	-19.9	0	0.001824081	0.618	0.0	0.0	-8.027944990557229	15	20	7	3UTR	MIRT762178	0	0
hsa-miR-139-3p	XM_047439414	SMIM7	TGGAGACGCGGCCCTGTTGGAGT#ACTCCGAATGTGGGGTTGCTGTCCAG#((((.(.((((((((((((((((#)))))))...)))))))))).)))).	455	481	0.9615384615384616	-27.2	0	3.203692e-05	0.412	0.0	0.0	-9.600298155885454	21	26	10	3UTR	MIRT467483	0	0
hsa-miR-139-3p	NM_199121	VWA1	TGGAGACGCGGCCCTGTTGGAGT#TTCCACCCTCTCTGTGAGCAGGGCTGCGGTCACCT#.((.((((((((((((((((((.#.))))...)))))))))))).)).)).	3703	3738	0.9615384615384616	-30.0	0	2.547173e-05	0.426	-0.027124354545454546	-0.03868876225	-6.825347112316308	20	27	12	3UTR	MIRT457793	0	1
hsa-miR-139-3p	NM_015898	ZBTB7A	TGGAGACGCGGCCCTGTTGGAGT#ATTTGAGGAGGGTCGTGTTGACTCCAT#(((((((((((((((.((.((((#)))).)).))))))))))...))))).	4921	4948	0.9615384615384616	-28.2	1	6.201341e-05	0.632	6.250308716666667	4.857109634125001	-4.1706235265052785	21	27	10	3UTR	MIRT151391	0	0
hsa-miR-139-3p	NM_002859	PXN	TGGAGACGCGGCCCTGTTGGAGT#CTCCAAAGGTCTGATGTCTCCAC#(((((((((((.(((.((((((.#))))))))).))).)))))))).	3411	3434	0.9615384615384616	-27.4	1	0.00138112	0.426	6.218164416666666	5.082073208624999	-7.517426836101634	20	23	9	3UTR	MIRT737549	0	0
hsa-miR-139-3p	NM_001300925	SMIM7	TGGAGACGCGGCCCTGTTGGAGT#ACTCCGAATGTGGGGTTGCTGTCCAG#((((.(.((((((((((((((((#)))))))...)))))))))).)))).	455	481	0.9615384615384616	-27.2	0	3.203692e-05	0.412	0.18604637894736836	-0.20114790500000002	-9.600298155885454	21	26	10	3UTR	MIRT467483	0	0
hsa-miR-139-3p	NM_001317990	ZBTB7A	TGGAGACGCGGCCCTGTTGGAGT#ATTTGAGGAGGGTCGTGTTGACTCCAT#(((((((((((((((.((.((((#)))).)).))))))))))...))))).	4803	4830	0.9615384615384616	-28.2	1	6.201341e-05	0.632	4.736734944444445	4.22478231125	-4.1706235265052785	21	27	10	3UTR	MIRT151391	0	0
hsa-miR-139-3p	NM_001348096	GFRA1	TGGAGACGCGGCCCTGTTGGAGT#AAAGCAAACTGGGGCTGTGTTTTCG#.(((((((((((((((((.....#.))).)))))))))))))).	2038	2063	1.0	-25.1	1	0.02810588	0.588	0.0	0.0	-3.793324837357118	17	20	14	3UTR	MIRT486631	0	0
hsa-miR-139-3p	NM_001348096	GFRA1	TGGAGACGCGGCCCTGTTGGAGT#GCTTCTAGCTGCCGCCCGTCTCCC#.(((((((((((...((((((((#))).))))).)))))..)))))).	5072	5096	1.0	-25.4	1	0.04755778	0.426	0.0	0.0	-6.674744927794402	19	24	6	3UTR	MIRT486631	0	0
hsa-miR-139-3p	NM_001365809	SYT7	TGGAGACGCGGCCCTGTTGGAGT#ACTCAACTGGGCCCCGTTTCTAG#((((((((.(((((.(((.((((#))))))).))))).)))))))).	2456	2479	1.0	-28.2	1	0.0003470634	0.368	0.0	0.0	-5.729413664698063	20	23	8	3UTR	MIRT484505	0	0
hsa-miR-139-3p	XM_047427855	SYT7	TGGAGACGCGGCCCTGTTGGAGT#GCTCAGCCAGGGAGGGGTCCCAGGACTCAACTGGGCCCCGTTTCTAG#((((((((.(((((.(((.((((#.))))))).))))).)))))))).	1940	1987	1.0	-28.6	1	0.0003470634	0.368	0.0	0.0	-5.729413664698063	20	24	8	3UTR	MIRT484505	0	0
hsa-miR-139-3p	XM_047438573	KANK2	TGGAGACGCGGCCCTGTTGGAGT#GCAGGGCCGGCTCCC#.((((.(.(((((((((......#)))))))))))))).	3920	3935	1.0	-25.6	0	2.572404e-06	0.471	0.0	0.0	-8.007918527730794	14	15	14	3UTR	MIRT737546	0	0
hsa-miR-139-3p	NM_181839	PKIA	TGGAGACGCGGCCCTGTTGGAGT#GCTCATTATCATGTTAAAAATGAGGGCAGAGGCTGTGGCTGCAG#((.((.((((((((((((.....#.))))).))))))).)).)).	511	555	1.0	-22.4	0	1.041995e-05	0.529	0.504894676923077	0.895402592725	-7.39607268170116	16	21	7	3UTR	MIRT713134	0	0
hsa-miR-139-3p	NM_001372050	THY1	TGGAGACGCGGCCCTGTTGGAGT#CTCCAGCAGTGCCTGCCTGCCCCCGCTTCGCTGGGGTCTCCAC#(((((((.((((.(((((((((.#))))))))).)))....................).))))))).	1776	1819	1.0	-30.8	1	0.0006099865	0.294	0.0	0.0	-7.5403399880485384	20	43	9	3UTR	MIRT490393	0	0
hsa-miR-139-3p	NM_001379549	KANK2	TGGAGACGCGGCCCTGTTGGAGT#GCAGGGCCGGCTCCC#.((((.(.(((((((((......#)))))))))))))).	4270	4285	1.0	-25.6	0	2.572404e-06	0.471	0.0	0.0	-8.007918527730794	14	15	14	3UTR	MIRT737546	0	0
hsa-miR-139-3p	NM_001381945	UCP2	TGGAGACGCGGCCCTGTTGGAGT#CTCTAGCCGGGCCATGCTTTCCT#.(((((((.(((((.(((((((.#))))))).))))).)).))))).	1385	1408	1.0	-28.1	1	0.007619291	0.485	0.0	0.0	-5.585164055853516	19	23	7	3UTR	MIRT494899	0	0
hsa-miR-139-3p	NM_001382558	GFRA1	TGGAGACGCGGCCCTGTTGGAGT#AAAGCAAACTGGGGCTGTGTTTTCG#.(((((((((((((((((.....#.))).)))))))))))))).	1990	2015	1.0	-25.1	1	0.02810588	0.588	0.0	0.0	-3.793324837357118	17	20	14	3UTR	MIRT486631	0	0
hsa-miR-139-3p	NM_001382558	GFRA1	TGGAGACGCGGCCCTGTTGGAGT#GCTTCTAGCTGCCGCCCGTCTCCC#.(((((((((((...((((((((#))).))))).)))))..)))))).	5024	5048	1.0	-25.4	1	0.04755778	0.426	0.0	0.0	-6.674744927794402	19	24	6	3UTR	MIRT486631	0	0
hsa-miR-139-3p	NM_014567	BCAR1	TGGAGACGCGGCCCTGTTGGAGT#TCCCCTGACAGGGCCAGTGCAGTTTGGTGTGTCCTCCG#.((((((((((((((((((((..#)))...))))))))).............))))).))).	3097	3135	1.0	-28.0	1	0.0004284672	0.441	2.599829435135135	2.3902803112499993	-3.793324837357118	20	38	9	3UTR	MIRT697046	0	0
hsa-miR-139-3p	NM_018129	PNPO	TGGAGACGCGGCCCTGTTGGAGT#ACTCCCTTTCTGGTGACAGACAGGGCCCCAGCAGCCCTGTCTGTTACCAT#(((((((((((((((((((((((#))))).............)))))))))...))......))))....))).	1188	1238	1.0	-24.6	1	0.000596757	0.441	-0.08420458775510203	0.11575850375	-3.937574446201665	23	50	9	3UTR	MIRT696701	0	0
hsa-miR-139-3p	NM_001252065	SYT7	TGGAGACGCGGCCCTGTTGGAGT#GCTCAGCCAGGGAGGGGTCCCAGGACTCAACTGGGCCCCGTTTCTAG#((((((((.(((((.(((.((((#.))))))).))))).)))))))).	1808	1855	1.0	-28.6	1	0.0003470634	0.368	1.1734393	0.97829132	-5.729413664698063	20	24	8	3UTR	MIRT484505	0	0
hsa-miR-139-3p	NM_001271818	ORAI2	TGGAGACGCGGCCCTGTTGGAGT#CTCCCAGACAGGGCCCTCTCTT#.(((((.(.(((((((((((((.#))))..))))))))))))))).	5837	5859	1.0	-28.8	0	0.000134033	0.382	-0.40846959333333327	-0.10715619399999998	-6.3934010304742	19	22	15	3UTR	MIRT701208	0	0
hsa-miR-139-3p	NM_001274	CHEK1	TGGAGACGCGGCCCTGTTGGAGT#CTCCAACCTGTTCCTCTCCT#.(((((.((((....(((((((.#)))))))))))...))))).	3095	3115	1.0	-19.6	0	0.293692	0.588	0.02416688571428573	0.027108587249999955	-11.565234772262077	16	20	11	3UTR	MIRT669035	0	0
hsa-miR-139-3p	NM_001278160	AKT1S1	TGGAGACGCGGCCCTGTTGGAGT#GCTCCAGCTTCCTGGGGGCGTGGCCAAGCCCTCCT#.((((.((((.((((((((((((#)))))))).....)))).))))........)))).	1423	1458	1.0	-27.3	0	0.0002891972	0.368	1.478563729411765	1.80360651875	-8.519058073960514	20	35	8	3UTR	MIRT737541	0	0
hsa-miR-139-3p	NM_001280551	PAX5	TGGAGACGCGGCCCTGTTGGAGT#GGTCCAGCGGAGCTGCCTGGGAGCTTGGTGAGGATGGCTCCAA#(((((..(((((.((((((((.(#).)))))))).))))).....................))))).	4004	4047	1.0	-25.1	0	8.446499e-05	0.412	-0.08805865000000002	0.1483655125	-8.671350354932274	19	43	8	3UTR	MIRT614882	0	0
hsa-miR-139-3p	NM_001280553	PAX5	TGGAGACGCGGCCCTGTTGGAGT#GGTCCAGCGGAGCTGCCTGGGAGCTTGGTGAGGATGGCTCCAA#(((((..(((((.((((((((.(#).)))))))).))))).....................))))).	4143	4186	1.0	-25.1	0	8.446499e-05	0.412	0.0	0.0	-8.671350354932274	19	43	8	3UTR	MIRT614882	0	0
hsa-miR-139-3p	NM_019008	MIEF1	TGGAGACGCGGCCCTGTTGGAGT#CCAACATGGTGAAACCCCGTCTCCAC#((((((((.((((.((((((...#)))))).)).....)).)))))))).	4069	4095	1.0	-25.4	1	0.01538184	0.485	-0.47652425	-0.121080089125	-5.850804021967834	18	26	8	3UTR	MIRT561905	0	1
hsa-miR-139-3p	NM_022834	VWA1	TGGAGACGCGGCCCTGTTGGAGT#TTCCACCCTCTCTGTGAGCAGGGCTGCGGTCACCT#.((.((((((((((((((((((.#.))))...)))))))))))).)).)).	4098	4133	1.0	-30.0	0	2.547173e-05	0.426	-0.7435894181818182	-0.7821752700000002	-6.825347112316308	20	27	12	3UTR	MIRT457793	0	1
hsa-miR-139-3p	NM_025157	PXN	TGGAGACGCGGCCCTGTTGGAGT#CTCCAAAGGTCTGATGTCTCCAC#(((((((((((.(((.((((((.#))))))))).))).)))))))).	3578	3601	1.0	-27.4	1	0.00138112	0.426	-0.03351761666666667	-0.16386320999999998	-7.517426836101634	20	23	9	3UTR	MIRT737549	0	0
hsa-miR-139-3p	NM_001145453	GFRA1	TGGAGACGCGGCCCTGTTGGAGT#GCTTCTAGCTGCCGCCCGTCTCCC#.(((((((((((...((((((((#))).))))).)))))..)))))).	5383	5407	1.0	-25.4	1	0.04755778	0.426	0.8801073307692308	1.0522880400000003	-6.674744927794402	19	24	6	3UTR	MIRT486631	0	0
hsa-miR-139-3p	NM_001145675	SORBS2	TGGAGACGCGGCCCTGTTGGAGT#AACAGGGGCGTTTCCT#.((((((((..(((((((.....#))))))))))))))).	3149	3165	1.0	-24.0	1	0.0006502176	0.588	1.7432923875	3.3375762787500003	-7.8606057810956464	15	16	15	3UTR	MIRT622151	0	0
hsa-miR-139-3p	NM_001170714	BCAR1	TGGAGACGCGGCCCTGTTGGAGT#TCCCCTGACAGGGCCAGTGCAGTTTGGTGTGTCCTCCG#.((((((((((((((((((((..#)))...))))))))).............))))).))).	3377	3415	1.0	-28.0	1	0.0004284672	0.441	0.0	0.0	-3.793324837357118	20	38	9	3UTR	MIRT697046	0	0
hsa-miR-139-3p	NM_001170715	BCAR1	TGGAGACGCGGCCCTGTTGGAGT#TCCCCTGACAGGGCCAGTGCAGTTTGGTGTGTCCTCCG#.((((((((((((((((((((..#)))...))))))))).............))))).))).	3036	3074	1.0	-28.0	1	0.0004284672	0.441	0.0	0.0	-3.793324837357118	20	38	9	3UTR	MIRT697046	0	0
hsa-miR-139-3p	NM_001170716	BCAR1	TGGAGACGCGGCCCTGTTGGAGT#TCCCCTGACAGGGCCAGTGCAGTTTGGTGTGTCCTCCG#.((((((((((((((((((((..#)))...))))))))).............))))).))).	3135	3173	1.0	-28.0	1	0.0004284672	0.441	0.0	0.0	-3.793324837357118	20	38	9	3UTR	MIRT697046	0	0
hsa-miR-139-3p	NM_001170717	BCAR1	TGGAGACGCGGCCCTGTTGGAGT#TCCCCTGACAGGGCCAGTGCAGTTTGGTGTGTCCTCCG#.((((((((((((((((((((..#)))...))))))))).............))))).))).	3151	3189	1.0	-28.0	1	0.0004284672	0.441	2.599829435135135	2.3902803112499993	-3.793324837357118	20	38	9	3UTR	MIRT697046	0	0
hsa-miR-139-3p	NM_001170718	BCAR1	TGGAGACGCGGCCCTGTTGGAGT#TCCCCTGACAGGGCCAGTGCAGTTTGGTGTGTCCTCCG#.((((((((((((((((((((..#)))...))))))))).............))))).))).	3126	3164	1.0	-28.0	1	0.0004284672	0.441	2.757607862162162	2.6937795837499996	-3.793324837357118	20	38	9	3UTR	MIRT697046	0	0
hsa-miR-139-3p	NM_001170719	BCAR1	TGGAGACGCGGCCCTGTTGGAGT#TCCCCTGACAGGGCCAGTGCAGTTTGGTGTGTCCTCCG#.((((((((((((((((((((..#)))...))))))))).............))))).))).	3041	3079	1.0	-28.0	1	0.0004284672	0.441	0.0	0.0	-3.793324837357118	20	38	9	3UTR	MIRT697046	0	0
hsa-miR-139-3p	NM_001170720	BCAR1	TGGAGACGCGGCCCTGTTGGAGT#TCCCCTGACAGGGCCAGTGCAGTTTGGTGTGTCCTCCG#.((((((((((((((((((((..#)))...))))))))).............))))).))).	2846	2884	1.0	-28.0	1	0.0004284672	0.441	0.0	0.0	-3.793324837357118	20	38	9	3UTR	MIRT697046	0	0
hsa-miR-139-3p	NM_005264	GFRA1	TGGAGACGCGGCCCTGTTGGAGT#AAAGCAAACTGGGGCTGTGTTTTCG#.(((((((((((((((((.....#.))).)))))))))))))).	1955	1980	1.0	-25.1	1	0.02810588	0.588	-0.1181382611111111	-0.17368330750000005	-3.793324837357118	17	20	14	3UTR	MIRT486631	0	0
hsa-miR-139-3p	NM_005264	GFRA1	TGGAGACGCGGCCCTGTTGGAGT#GCTTCTAGCTGCCGCCCGTCTCCC#.(((((((((((...((((((((#))).))))).)))))..)))))).	4989	5013	1.0	-25.4	1	0.04755778	0.426	0.02510862307692309	0.6621324637499999	-6.674744927794402	19	24	6	3UTR	MIRT486631	0	0
hsa-miR-139-3p	NM_006288	THY1	TGGAGACGCGGCCCTGTTGGAGT#CTTCAGCACCTAAGTCCATACCTAGGGCCGTGGAATTCCC#.((((.((((((((((((((((.#))))))))................))))))))...)))).	3744	3784	1.0	-26.5	0	1.149688e-05	0.441	0.03126519999999994	1.0807147874999998	-5.694283598550164	20	40	8	3UTR	MIRT490393	0	0
hsa-miR-139-3p	NM_006823	PKIA	TGGAGACGCGGCCCTGTTGGAGT#GCTCATTATCATGTTAAAAATGAGGGCAGAGGCTGTGGCTGCAG#((.((.((((((((((((.....#.))))).))))))).)).)).	640	684	1.0	-22.4	0	1.041995e-05	0.529	0.7372346307692308	1.9730563187500003	-7.39607268170116	16	21	7	3UTR	MIRT713134	0	0
hsa-miR-139-3p	NM_007065	CDC37	TGGAGACGCGGCCCTGTTGGAGT#CCAGCCAAGGGGCCGGCTCTCG#..((((..((((((((((((...#)))))...)))))))..)))).	1505	1527	1.0	-27.8	0	4.050451e-05	0.382	4.767643533333333	4.4660292875000005	-8.81432218342424	16	22	7	3UTR	MIRT737543	0	0
hsa-miR-139-3p	NM_002116	HLA-A	TGGAGACGCGGCCCTGTTGGAGT#GGGGCTGAGGTGTCTCCAT#(((((((((((((((........#))))))...))))))))).	1346	1365	1.0	-25.1	1	3.762501e-05	0.456	1.2793348888888891	2.3619132437499997	-4.1706235265052785	15	19	9	3UTR	MIRT454198	0	0
hsa-miR-139-3p	NM_003355	UCP2	TGGAGACGCGGCCCTGTTGGAGT#CTCTAGCCGGGCCATGCTTTCCT#.(((((((.(((((.(((((((.#))))))).))))).)).))))).	1347	1370	1.0	-28.1	1	0.007619291	0.485	0.0	0.0	-5.585164055853516	19	23	7	3UTR	MIRT494899	0	0
hsa-miR-139-3p	NM_003403	YY1	TGGAGACGCGGCCCTGTTGGAGT#ACTTGGACCTGGGCAGCGTCTTCT#.((((((((.((((.(((.((((#)))).)))..)))).)))))))).	3395	3419	1.0	-29.7	1	0.000344362	0.456	0.0	0.0	-5.771280865935932	19	24	8	3UTR	MIRT783782	0	0
hsa-miR-139-3p	NM_003403	YY1	TGGAGACGCGGCCCTGTTGGAGT#GCTCCAGCAGGACCTTGGCTTGTCTG#...((((((((.(((((((((((#))))))))))).))...))..)))).	2631	2657	1.0	-26.0	0	3.744078e-05	0.471	0.0	0.0	-9.861343503275094	19	26	11	3UTR	MIRT783782	0	0
hsa-miR-139-3p	NM_004048	B2M	TGGAGACGCGGCCCTGTTGGAGT#GCTCTAGGAGGGCTGGCAACTTA#..(((..((((((((.(((((((#))))))).))))))).)..))).	604	627	1.0	-25.4	0	0.008357912	0.456	-0.02560844444444445	0.004417214999999983	-8.63469509574027	18	23	7	3UTR	MIRT481108	0	0
hsa-miR-139-3p	NM_004200	SYT7	TGGAGACGCGGCCCTGTTGGAGT#GCTCAGCCAGGGAGGGGTCCCAGGACTCAACTGGGCCCCGTTTCTAG#((((((((.(((((.(((.((((#.))))))).))))).)))))))).	1583	1630	1.0	-28.6	1	0.0003470634	0.368	0.33579012500000005	0.1852506575	-5.729413664698063	20	24	8	3UTR	MIRT484505	0	0
hsa-miR-139-3p	XM_005274385	SYT7	TGGAGACGCGGCCCTGTTGGAGT#ACTCAACTGGGCCCCGTTTCTAG#((((((((.(((((.(((.((((#))))))).))))).)))))))).	2231	2254	1.0	-28.2	1	0.0003470634	0.368	0.0	0.0	-5.729413664698063	20	23	8	3UTR	MIRT484505	0	0
hsa-miR-139-3p	XM_017013622	PKIA	TGGAGACGCGGCCCTGTTGGAGT#GCTCATTATCATGTTAAAAATGAGGGCAGAGGCTGTGGCTGCAG#((.((.((((((((((((.....#.))))).))))))).)).)).	435	479	1.0	-22.4	0	1.041995e-05	0.529	0.0	0.0	-7.39607268170116	16	21	7	3UTR	MIRT713134	0	0
hsa-miR-139-3p	NM_001042697	ZSWIM7	TGGAGACGCGGCCCTGTTGGAGT#ACTCTGCACTTCTGATCTTTACAACAGGGCAATTGAAGGAACAGACTAAAAATCGTGTCCTG#.((.((((((((((((((((((.#.)))..))))))))).......................)))))))).	1460	1522	1.0	-23.1	0	0.0005358339	0.559	0.44105370697674423	1.2576621562499994	-6.825347112316308	20	47	9	3UTR	MIRT690369	0	0
hsa-miR-139-3p	NM_001042698	ZSWIM7	TGGAGACGCGGCCCTGTTGGAGT#ACTCTGCACTTCTGATCTTTACAACAGGGCAATTGAAGGAACAGACTAAAAATCGTGTCCTG#.((.((((((((((((((((((.#.)))..))))))))).......................)))))))).	1330	1392	1.0	-23.1	0	0.0005358339	0.559	0.4690986697674418	1.2374931137499994	-6.825347112316308	20	47	9	3UTR	MIRT690369	0	0
hsa-miR-139-3p	NM_001081492	KRT80	TGGAGACGCGGCCCTGTTGGAGT#ACTCCAGCCACCTCACCTGATTGGCTATCTTGGGGCCATGTCCCCT#.((.((((.((((((((((((((#)))))))).......................)))))).)))).)).	3286	3332	1.0	-29.4	0	8.999829e-06	0.485	1.9866662054054054	1.8473041449999998	-7.881736770562071	20	46	8	3UTR	MIRT694838	0	0
hsa-miR-139-3p	NM_001098632	AKT1S1	TGGAGACGCGGCCCTGTTGGAGT#GCTCCAGCTTCCTGGGGGCGTGGCCAAGCCCTCCT#.((((.((((.((((((((((((#)))))))).....)))).))))........)))).	1599	1634	1.0	-27.3	0	0.0002891972	0.368	2.278659776470588	2.1384547125000006	-8.519058073960514	20	35	8	3UTR	MIRT737541	0	0
hsa-miR-139-3p	NM_001126340	ORAI2	TGGAGACGCGGCCCTGTTGGAGT#CTCCCAGACAGGGCCCTCTCTT#.(((((.(.(((((((((((((.#))))..))))))))))))))).	5814	5836	1.0	-28.8	0	0.000134033	0.382	-0.46341809599999995	-0.1820589252499999	-6.3934010304742	19	22	15	3UTR	MIRT701208	0	0
hsa-miR-139-3p	NM_032831	ORAI2	TGGAGACGCGGCCCTGTTGGAGT#CTCCCAGACAGGGCCCTCTCTT#.(((((.(.(((((((((((((.#))))..))))))))))))))).	5705	5727	1.0	-28.8	0	0.000134033	0.382	-0.46341809599999995	-0.1820589252499999	-6.3934010304742	19	22	15	3UTR	MIRT701208	0	0
hsa-miR-139-3p	NM_144694	ZNF570	TGGAGACGCGGCCCTGTTGGAGT#ATTCCAACCTGGGCAACAAGGCTGCAACTCCGT#(((((..((((((.(((((....#.))))).))))))..))))).	2637	2670	1.0	-25.7	0	0.01054984	0.588	0.03507750000000002	-0.11424595499999995	-8.239059659786438	16	21	6	3UTR	MIRT737557	0	0
hsa-miR-139-3p	NM_145793	GFRA1	TGGAGACGCGGCCCTGTTGGAGT#GCTTCTAGCTGCCGCCCGTCTCCC#.(((((((((((...((((((((#))).))))).)))))..)))))).	4880	4904	1.0	-25.4	1	0.04755778	0.426	0.3482185615384616	0.1443486	-6.674744927794402	19	24	6	3UTR	MIRT486631	0	0
hsa-miR-139-3p	NM_152279	ZNF585B	TGGAGACGCGGCCCTGTTGGAGT#CTCAGTTGCAACTCGACAGAGCCGCATTTACTCCAG#(((((..(((((.(((((.((((#.))))))))).))))).....))))).	4730	4766	1.0	-26.2	0	0.06303249	0.471	0.5443728	-0.37856791125	-8.671350354932274	19	27	9	3UTR	MIRT452054	0	0
hsa-miR-139-3p	NM_001300959	ZMIZ2	TGGAGACGCGGCCCTGTTGGAGT#CGAGCAGGGCGCCTGGGCTGTTGTGTCTCCT#.(((((((((((((((((.(...#).))))))))...........))))))))).	3711	3742	1.0	-29.1	1	0.0008003887	0.412	-0.10760714285714287	0.7609625	-3.793324837357118	18	31	9	3UTR	MIRT737556	0	0
hsa-miR-139-3p	NM_001311162	THY1	TGGAGACGCGGCCCTGTTGGAGT#CTCCAGCAGTGCCTGCCTGCCCCCGCTTCGCTGGGGTCTCCAC#(((((((.((((.(((((((((.#))))))))).)))....................).))))))).	1855	1898	1.0	-30.8	1	0.0006099865	0.294	-0.030046373333333338	0.133287659	-7.5403399880485384	20	43	9	3UTR	MIRT490393	0	0
hsa-miR-142-3p	NM_001177381	CPEB2	TGTAGTGTTTCCTACTTTATGGA#CTATATAGTGGGGGAAGCGTGCAC#((((((.(((((((((.(((((.#))))).))))))))).)).)))).	3536	3560	0.9615384615384616	-19.5	0	0.0006302296	0.588	5.075402222222222	5.2850859125	-5.4812609810729835	20	24	9	3UTR	MIRT494152	0	1
hsa-miR-142-3p	NM_001177383	CPEB2	TGTAGTGTTTCCTACTTTATGGA#CTATATAGTGGGGGAAGCGTGCAC#((((((.(((((((((.(((((.#))))).))))))))).)).)))).	3527	3551	0.9615384615384616	-19.5	0	0.0006302296	0.588	5.075402222222222	5.2850859125	-5.4812609810729835	20	24	9	3UTR	MIRT494152	0	1
hsa-miR-142-3p	NM_001177384	CPEB2	TGTAGTGTTTCCTACTTTATGGA#CTATATAGTGGGGGAAGCGTGCAC#((((((.(((((((((.(((((.#))))).))))))))).)).)))).	3512	3536	0.9615384615384616	-19.5	0	0.0006302296	0.588	5.075402222222222	5.2850859125	-5.4812609810729835	20	24	9	3UTR	MIRT494152	0	1
hsa-miR-142-3p	NM_001363568	UCK2	TGTAGTGTTTCCTACTTTATGGA#CCAGCCCCTATCTCCAAGAGACAGAGGAGGGGTCAGGAGGCACTGCT#.(((((((((((((((((.....#.))))).)))))))))))).	1261	1308	1.0	-21.7	1	2.342292e-05	0.529	0.0	0.0	-3.793324837357118	17	20	12	3UTR	MIRT464486	0	0
hsa-miR-142-3p	NM_001363742	ATG16L1	TGTAGTGTTTCCTACTTTATGGA#TCTTGCCTTGGGAAACACTACT#.(((((((((((((.........#.))))))))))))).	2273	2295	1.0	-20.0	1	0.03013394	0.485	0.0	0.0	-4.761823477911366	13	15	13	3UTR	MIRT157856	0	0
hsa-miR-142-3p	NM_001366057	OTUD4	TGTAGTGTTTCCTACTTTATGGA#GGAAGGAAATACTACT#.((((((((((((.((.......#)).)))))))))))).	6053	6069	1.0	-17.4	1	0.02357664	0.691	0.0	0.0	-4.650164754877524	14	16	12	3UTR	MIRT566569	0	0
hsa-miR-142-3p	XM_047436389	PRKCA	TGTAGTGTTTCCTACTTTATGGA#CCAATGAATAAAATCAGAAATGAAGGAGACATTGCAA#(((((((((((((..........#.))))))))))))).	4046	4083	1.0	-18.3	1	0.08261686	0.691	0.0	0.0	-5.762913004276319	13	15	13	3UTR	MIRT733898	0	0
hsa-miR-142-3p	XM_047439656	ZNF682	TGTAGTGTTTCCTACTTTATGGA#TTCATACTGGAGAGAAACACTACAA#(((((((((((((.(..((((((#))))))..).)).))))))))))).	1939	1964	1.0	-20.8	1	0.06753537	0.647	0.0	0.0	-5.027463444025684	20	25	11	3UTR	MIRT683830	0	1
hsa-miR-142-3p	NM_183004	EIF5	TGTAGTGTTTCCTACTTTATGGA#GTAGGAGATACTGG#..(((((((((((((........#))))))))))))).	3611	3625	1.0	-18.3	1	0.003600144	0.588	3.210878915384615	5.392859834999999	-5.1900497996759025	13	14	13	3UTR	MIRT523917	0	0
hsa-miR-142-3p	NM_194071	CREB3L2	TGTAGTGTTTCCTACTTTATGGA#CCAGACTGGGTTTTCAAGGCTCCCAGACGTAGAGTAGGAAACGTGCT#.(((.((((((((((((((((..#.))))))))))))))))))).	4140	4187	1.0	-24.6	0	0.0001535735	0.529	0.0	0.0	-7.91236201216959	19	21	19	3UTR	MIRT440881	0	0
hsa-miR-142-3p	NM_198890	ATG16L1	TGTAGTGTTTCCTACTTTATGGA#TCTTGCCTTGGGAAACACTACT#.(((((((((((((.........#.))))))))))))).	1733	1755	1.0	-20.0	1	0.03013394	0.485	0.9954469846153846	0.63928672375	-4.761823477911366	13	15	13	3UTR	MIRT157856	0	0
hsa-miR-142-3p	NM_001375462	LPP	TGTAGTGTTTCCTACTTTATGGA#CTAGAGAGGGGTGAAACACTGCAG#(((((((((((((.((((.(((.#))).)))).)).))))))))))).	8155	8179	1.0	-21.3	1	0.0003603625	0.647	0.0	0.0	-4.794414363722071	20	24	11	3UTR	MIRT237292	0	0
hsa-miR-142-3p	NM_014739	BCLAF1	TGTAGTGTTTCCTACTTTATGGA#GGAGTGGGAATAAAACTACT#.(((((..((((((((((.....#))))))))))....))))).	4842	4862	1.0	-17.9	0	0.0001883565	0.662	5.7351149999999995	3.7396564750000003	-7.650646301409068	15	20	10	3UTR	MIRT441110	0	1
hsa-miR-142-3p	NM_015458	MTMR9	TGTAGTGTTTCCTACTTTATGGA#TCCATACCATCTGTATATAACCATTTCGGTAGAGAACACACTACAC#((((((((((((((((..((((.#.))))...))))).))).)))))))).	3044	3090	1.0	-21.6	1	0.003348669	0.574	0.5707149	0.27627818249999997	-3.937574446201665	20	27	8	3UTR	MIRT440201	0	1
hsa-miR-142-3p	NM_017974	ATG16L1	TGTAGTGTTTCCTACTTTATGGA#TCTTGCCTTGGGAAACACTACT#.(((((((((((((.........#.))))))))))))).	2165	2187	1.0	-20.0	1	0.03013394	0.485	0.0	0.0	-4.761823477911366	13	15	13	3UTR	MIRT157856	0	0
hsa-miR-142-3p	NM_018299	UBE2W	TGTAGTGTTTCCTACTTTATGGA#CATAAGTGGGAATCCCTACG#.((((.(.(((((((.(((((..#)))))))))))).).)))).	7481	7501	1.0	-18.5	0	6.129272e-05	0.603	3.5735295714285713	2.4797789683749993	-8.240967608034408	17	20	12	3UTR	MIRT021613	0	0
hsa-miR-142-3p	NM_018299	UBE2W	TGTAGTGTTTCCTACTTTATGGA#TAAGGTAGGAAATATC#....(((((((((((((((....#))))))))))))))).	7550	7566	1.0	-18.0	0	0.003162611	0.647	2.3369509933333337	3.3210674849999995	-9.546562468637928	15	16	15	3UTR	MIRT021613	0	0
hsa-miR-142-3p	NM_001277197	CNIH4	TGTAGTGTTTCCTACTTTATGGA#TCTATCAAAGCCAGGAAAGTGGGGGATCACTGT#..((((((((((((((((.(((.#.)))..))))))))))).))))).	2516	2549	1.0	-21.7	1	0.000536661	0.676	0.5496537647058823	-0.10607781749999998	-4.95700071937229	19	24	11	3UTR	MIRT021630	0	0
hsa-miR-142-3p	NM_020408	LYRM4	TGTAGTGTTTCCTACTTTATGGA#TCAAGCACCACTTGAGACTGGGGGCAGCATGGAGTAGGGCAGGGCTACGG#((((((.((((((((((((((..#.)))))))))))).)).)))))).	978	1028	1.0	-24.4	0	3.613907e-06	0.412	0.09386302666666667	0.96388074945	-5.4812609810729835	20	24	12	3UTR	MIRT458148	0	0
hsa-miR-142-3p	NM_024513	FYCO1	TGTAGTGTTTCCTACTTTATGGA#AGGAAACACTGCT#.((((((((((((..........#)))))))))))).	4684	4697	1.0	-19.0	1	0.002342014	0.574	6.3977416666666675	4.1654348	-5.618663395431772	12	13	12	3UTR	MIRT440602	0	1
hsa-miR-142-3p	NM_025191	EDEM3	TGTAGTGTTTCCTACTTTATGGA#GTGGAGTGGGGAATAG#.....(((((((((((((((...#))))))))))))))).	3353	3369	1.0	-17.4	0	0.0651831	0.647	1.2159655933333335	0.17424417875000003	-13.6655996434504	15	16	15	3UTR	MIRT021628	0	0
hsa-miR-142-3p	NM_030803	ATG16L1	TGTAGTGTTTCCTACTTTATGGA#TCTTGCCTTGGGAAACACTACT#.(((((((((((((.........#.))))))))))))).	2222	2244	1.0	-20.0	1	0.03013394	0.485	0.6733184307692307	0.5701692675000001	-4.761823477911366	13	15	13	3UTR	MIRT157856	0	0
hsa-miR-142-3p	NM_030949	PPP1R14C	TGTAGTGTTTCCTACTTTATGGA#TGCATTGGAAAAAGGAAGCACTGT#..(((((((((((..........#.))))))))))).	1472	1496	1.0	-15.7	1	0.008097956	0.574	0.3526535454545454	0.46544732125000016	-6.782339277446944	11	13	11	3UTR	MIRT555352	0	0
hsa-miR-142-3p	NM_001166693	AFF1	TGTAGTGTTTCCTACTTTATGGA#CATAGGGTAGGGAAGCAGTGA#..((.((((((((((((((((..#))))))))))).))))).)).	8895	8916	1.0	-20.5	0	0.00142629	0.574	0.29756180588235304	0.2183960275	-9.076037894184761	18	21	11	3UTR	MIRT213721	0	1
hsa-miR-142-3p	NM_001184760	CLTA	TGTAGTGTTTCCTACTTTATGGA#GTGGAAACACTACAT#((((((((((((.((........#)))))))))))))).	840	855	1.0	-19.4	1	0.0006467046	0.529	2.7497000000000003	3.911249296625	-5.459754139171521	14	15	14	3UTR	MIRT107700	0	1
hsa-miR-142-3p	NM_001184762	CLTA	TGTAGTGTTTCCTACTTTATGGA#GTGGAAACACTACAT#((((((((((((.((........#)))))))))))))).	648	663	1.0	-19.4	1	0.0006467046	0.529	6.287064166666667	5.444389750000001	-5.459754139171521	14	15	14	3UTR	MIRT107700	0	1
hsa-miR-142-3p	NM_004872	TMEM59	TGTAGTGTTTCCTACTTTATGGA#CCTAGAGGCCAGAGGGTGAGGCACTGCAG#(((((((((((..(((((.(((.#.))).)))))))))))))))).	4541	4570	1.0	-21.1	1	0.0001104312	0.471	0.16559699999999997	-0.012385951250000006	-8.573508368464264	19	22	16	3UTR	MIRT439429	0	1
hsa-miR-142-3p	NM_005983	SKP2	TGTAGTGTTTCCTACTTTATGGA#CCATTTGAGAGGGAAAACTATG#.(((((.((((((.(((.((((.#))))..))))))))).))))).	1557	1579	1.0	-17.0	0	0.02146154	0.662	0.9582195000000001	0.27373654625000005	-6.193851289748842	18	22	9	3UTR	MIRT021626	0	0
hsa-miR-142-3p	NM_006241	PPP1R2	TGTAGTGTTTCCTACTTTATGGA#CTATAGGTGGGAAATACA#....(((((((((((.((((((.#))))))))))))))))).	1923	1941	1.0	-20.3	0	0.0008244031	0.603	0.2169871909090909	0.70670912625	-9.779611548941542	17	18	17	3UTR	MIRT439919	0	1
hsa-miR-142-3p	NM_007096	CLTA	TGTAGTGTTTCCTACTTTATGGA#GTGGAAACACTACAT#((((((((((((.((........#)))))))))))))).	894	909	1.0	-19.4	1	0.0006467046	0.529	2.7497000000000003	3.911249296625	-5.459754139171521	14	15	14	3UTR	MIRT107700	0	1
hsa-miR-142-3p	NM_012474	UCK2	TGTAGTGTTTCCTACTTTATGGA#CCAGCCCCTATCTCCAAGAGACAGAGGAGGGGTCAGGAGGCACTGCT#.(((((((((((((((((.....#.))))).)))))))))))).	1023	1070	1.0	-21.7	1	2.342292e-05	0.529	0.21357855555555558	1.8892135137500006	-3.793324837357118	17	20	12	3UTR	MIRT464486	0	0
hsa-miR-142-3p	NM_014184	CNIH4	TGTAGTGTTTCCTACTTTATGGA#TCTATCAAAGCCAGGAAAGTGGGGGATCACTGT#..((((((((((((((((.(((.#.)))..))))))))))).))))).	2657	2690	1.0	-21.7	1	0.000536661	0.676	0.5496537647058823	-0.10607781749999998	-4.95700071937229	19	24	11	3UTR	MIRT021630	0	0
hsa-miR-142-3p	NM_001448	GPC4	TGTAGTGTTTCCTACTTTATGGA#GTGGGGTGGGAGTAGGTAGAGCTGAGAATACTACAT#((((((((((((((((((((...#)))))))))))...............))))))))).	3499	3535	1.0	-19.5	1	3.833793e-05	0.456	3.2393444771428577	2.27831180125	-3.937574446201665	20	36	11	3UTR	MIRT021567	0	0
hsa-miR-142-3p	NM_001776	ENTPD1	TGTAGTGTTTCCTACTTTATGGA#TCCAGAGGAAGGCACCTTGCTGAATGACTAGAATGGAAGTAGGAGACATTTTGCAG#((((((((((((((((((.....#.))))))))))))))..)))).	12194	12250	1.0	-21.8	1	0.0006447156	0.5	0.0	0.0	-3.937574446201665	18	22	14	3UTR	MIRT127801	0	1
hsa-miR-142-3p	NM_001833	CLTA	TGTAGTGTTTCCTACTTTATGGA#GTGGAAACACTACAT#((((((((((((.((........#)))))))))))))).	804	819	1.0	-19.4	1	0.0006467046	0.529	0.0	0.0	-5.459754139171521	14	15	14	3UTR	MIRT107700	0	1
hsa-miR-142-3p	NM_001969	EIF5	TGTAGTGTTTCCTACTTTATGGA#TTCATTAACTGGAATTCTGTAGGAGATACTGG#..(((((((((((((........#.))))))))))))).	3528	3560	1.0	-18.3	1	0.003600144	0.588	0.0	0.0	-5.1900497996759025	13	15	13	3UTR	MIRT523917	0	0
hsa-miR-142-3p	XM_005246086	ATG16L1	TGTAGTGTTTCCTACTTTATGGA#TCTTGCCTTGGGAAACACTACT#.(((((((((((((.........#.))))))))))))).	1790	1812	1.0	-20.0	1	0.03013394	0.485	0.0	0.0	-4.761823477911366	13	15	13	3UTR	MIRT157856	0	0
hsa-miR-142-3p	NM_001076677	CLTA	TGTAGTGTTTCCTACTTTATGGA#GTGGAAACACTACAT#((((((((((((.((........#)))))))))))))).	858	873	1.0	-19.4	1	0.0006467046	0.529	2.7497000000000003	3.911249296625	-5.459754139171521	14	15	14	3UTR	MIRT107700	0	1
hsa-miR-142-3p	NM_001077440	BCLAF1	TGTAGTGTTTCCTACTTTATGGA#GGAGTGGGAATAAAACTACT#.(((((..((((((((((.....#))))))))))....))))).	4689	4709	1.0	-17.9	0	0.0001883565	0.662	4.0977262230000004	4.2258507	-7.650646301409068	15	20	10	3UTR	MIRT441110	0	1
hsa-miR-142-3p	NM_001102653	OTUD4	TGTAGTGTTTCCTACTTTATGGA#GGAAGGAAATACTACT#.((((((((((((.((.......#)).)))))))))))).	5380	5396	1.0	-17.4	1	0.02357664	0.691	2.7749415833333337	3.137766108000001	-4.650164754877524	14	16	12	3UTR	MIRT566569	0	0
hsa-miR-142-3p	NM_032815	NFATC2IP	TGTAGTGTTTCCTACTTTATGGA#TCCACAATGTCAATTGCAGTTTACACACATTGCCTAAAGTGGGGGACACC#....(((((((((((((((.((.#.))))))))))))))))).	2289	2339	1.0	-23.4	0	0.0003656285	0.441	-0.49483865333333327	-0.23441197999999996	-9.546562468637928	17	19	17	3UTR	MIRT142774	0	1
hsa-miR-142-3p	NM_033406	FBXO3	TGTAGTGTTTCCTACTTTATGGA#GTAGGGTTAACACTGCAG#(((((((((((((((........#))))))..))))))))).	1302	1320	1.0	-19.1	1	0.00202946	0.647	-0.2758978529411764	-0.04202889374999994	-4.1706235265052785	15	18	9	3UTR	MIRT021627	0	1
hsa-miR-142-3p	NM_145034	TOR1AIP2	TGTAGTGTTTCCTACTTTATGGA#AAAGATTTTAGGAAACACTAA#..((((((((((((.........#.)))))))))))).	3471	3492	1.0	-17.2	1	0.002859678	0.676	0.060951583333333316	0.035166712499999996	-5.925499359926538	12	14	12	3UTR	MIRT497475	0	0
hsa-miR-142-3p	NM_001291505	PPP1R2	TGTAGTGTTTCCTACTTTATGGA#CTATAGGTGGGAAATACA#....(((((((((((.((((((.#))))))))))))))))).	1845	1863	1.0	-20.3	0	0.0008244031	0.603	0.3891160454545455	0.61372903	-9.779611548941542	17	18	17	3UTR	MIRT439919	0	1
hsa-miR-142-3p	NM_001301038	BCLAF1	TGTAGTGTTTCCTACTTTATGGA#GGAGTGGGAATAAAACTACT#.(((((..((((((((((.....#))))))))))....))))).	4836	4856	1.0	-17.9	0	0.0001883565	0.662	5.66521	3.8209034624999996	-7.650646301409068	15	20	10	3UTR	MIRT441110	0	1
hsa-miR-142-3p	NM_001305051	TMEM59	TGTAGTGTTTCCTACTTTATGGA#CCTAGAGGCCAGAGGGTGAGGCACTGCAG#(((((((((((..(((((.(((.#.))).)))))))))))))))).	4554	4583	1.0	-21.1	1	0.0001104312	0.471	-0.2394407454545454	0.05003894	-8.573508368464264	19	22	16	3UTR	MIRT439429	0	1
hsa-miR-142-3p	NM_001305052	TMEM59	TGTAGTGTTTCCTACTTTATGGA#CCTAGAGGCCAGAGGGTGAGGCACTGCAG#(((((((((((..(((((.(((.#.))).)))))))))))))))).	4448	4477	1.0	-21.1	1	0.0001104312	0.471	0.08102853636363636	0.015154330000000014	-8.573508368464264	19	22	16	3UTR	MIRT439429	0	1
hsa-miR-142-3p	NM_001311204	CLTA	TGTAGTGTTTCCTACTTTATGGA#GTGGAAACACTACAT#((((((((((((.((........#)))))))))))))).	738	753	1.0	-19.4	1	0.0006467046	0.529	2.7497000000000003	3.911249296625	-5.459754139171521	14	15	14	3UTR	MIRT107700	0	1
hsa-miR-142-5p	NM_001199707	KIAA0895	CATAAAGTAGAAAGCACTACT#GTAGTGTTTTCTAA#.......(((((((((((((.#))))))))))))).	3581	3595	1.0	-18.0	0	0.001380277	0.676	1.3355006923076924	1.2060484212500002	-17.110244939514768	13	14	13	3UTR	MIRT562093	0	1
hsa-miR-142-5p	NM_006135	CAPZA1	CATAAAGTAGAAAGCACTACT#GGTATCTTGTGCTTTAATACTTTATGG#(((((((((.(((((((....#.)))))))..))))))))).	1709	1736	1.0	-19.3	1	0.0007090334	0.706	2.695437777777778	1.80191130125	-5.180080914529843	16	20	9	3UTR	MIRT179576	0	0
hsa-miR-142-5p	NM_002738	PRKCB	CATAAAGTAGAAAGCACTACT#GGTGTCCTGTCCAGAAAGTGCAGGGTGCTTTCTGCTCTGTA#.(((.(((((((((((((...#.))))))))))))).))).	4268	4309	1.0	-21.1	0	0.0004280734	0.441	-0.06126035384615384	-0.5207676537499999	-7.91236201216959	16	19	13	3UTR	MIRT395211	0	1
hsa-miR-142-5p	NM_001100425	KIAA0895	CATAAAGTAGAAAGCACTACT#GTAGTGTTTTCTAA#.......(((((((((((((.#))))))))))))).	3505	3519	1.0	-18.0	0	0.001380277	0.676	2.0093319769230766	1.6727171049999994	-17.110244939514768	13	14	13	3UTR	MIRT562093	0	1
hsa-miR-142-5p	NM_001300956	KIAA0895	CATAAAGTAGAAAGCACTACT#GTAGTGTTTTCTAA#.......(((((((((((((.#))))))))))))).	2629	2643	1.0	-18.0	0	0.001380277	0.676	2.3875457692307696	1.3594548687499999	-17.110244939514768	13	14	13	3UTR	MIRT562093	0	1
hsa-miR-144-3p	NM_001278438	FNDC3A	TACAGTATAGATGATGTACT#GTATTGTAACAGTTTTATGTCAAATGATCTGTGCTGTAG#((((((((((((.((.....#.)).)))))))))))).	5427	5466	0.9615384615384616	-17.8	1	0.02735613	0.706	3.8333666666666666	3.194684799999999	-5.459754139171521	14	17	12	3UTR	MIRT068846	1	1
hsa-miR-144-3p	NM_005544	IRS1	TACAGTATAGATGATGTACT#TGCATGGTCTGTATTGC#..((((((((((.(((((..#))))).)))))))))).	9450	9467	0.9692307692307692	-18.1	1	0.0003910415	0.662	0.4929044	0.6592959875000001	-6.246131332038532	15	17	10	3UTR	MIRT734527	1	1
hsa-miR-144-3p	NM_001385042	TEX9	TACAGTATAGATGATGTACT#AGTTCTACTGCTTGGATTACCTAGATAGGAAGGCACTTCATCTATACTGTAC#((((((((((((((.((.((#.)).)).)))))))))))))).	2373	2425	1.0	-21.7	1	0.1154822	0.632	0.0	0.0	-4.6730240064523	18	22	14	3UTR	MIRT712705	0	0
hsa-miR-144-3p	NM_001395496	TEX9	TACAGTATAGATGATGTACT#AGTTCTACTGCTTGGATTACCTAGATAGGAAGGCACTTCATCTATACTGTAC#((((((((((((((.((.((#.)).)).)))))))))))))).	2211	2263	1.0	-21.7	1	0.1154822	0.632	0.0	0.0	-4.6730240064523	18	22	14	3UTR	MIRT712705	0	0
hsa-miR-144-3p	NM_014923	FNDC3A	TACAGTATAGATGATGTACT#GTATTGTAACAGTTTTATGTCAAATGATCTGTGCTGTAG#((((((((((((.((.....#.)).)))))))))))).	5047	5086	1.0	-17.8	1	0.02735613	0.706	2.9402051666666664	2.9309899625000004	-5.459754139171521	14	17	12	3UTR	MIRT068846	1	1
hsa-miR-144-3p	NM_001079673	FNDC3A	TACAGTATAGATGATGTACT#GTATTGTAACAGTTTTATGTCAAATGATCTGTGCTGTAG#((((((((((((.((.....#.)).)))))))))))).	5437	5476	1.0	-17.8	1	0.02735613	0.706	2.9402051666666664	2.9309899625000004	-5.459754139171521	14	17	12	3UTR	MIRT068846	1	1
hsa-miR-144-5p	NM_018702	ADARB2	GGATATCATCATATACTGTAAG#ATGGTGGTGTCCA#((((((((((((..........#)))))))))))).	4051	4064	1.0	-17.0	1	4.225446e-05	0.426	0.2656849666666667	0.17269720374999997	-7.052043616942562	12	13	12	3UTR	MIRT539451	0	0
hsa-miR-144-5p	NM_005359	SMAD4	GGATATCATCATATACTGTAAG#TATAGAAACACTTGTGTGATGATAGTCCT#(((((((((((((((.(((...#.)))..)))))))))))).))).	3847	3876	1.0	-18.5	1	0.002624771	0.632	0.26625	0.10350000000000001	-4.1706235265052785	18	23	12	3UTR	MIRT735483	0	0
hsa-miR-144-5p	NM_001322814	SOD2	GGATATCATCATATACTGTAAG#TTTATAGTATTCTCTGTGTACTCTGTATTTCTGTGGGATTGGTGGTGATATCCA#((((((((((((..........#.)))))))))))).	9154	9208	1.0	-18.3	1	0.0001851263	0.676	0.11080891666666666	0.04398804999999997	-7.052043616942562	12	14	12	3UTR	MIRT525757	0	0
hsa-miR-144-5p	NM_001322815	SOD2	GGATATCATCATATACTGTAAG#TTTATAGTATTCTCTGTGTACTCTGTATTTCTGTGGGATTGGTGGTGATATCCA#((((((((((((..........#.)))))))))))).	9091	9145	1.0	-18.3	1	0.0001851263	0.676	-0.2268875833333334	-0.023910656250000023	-7.052043616942562	12	14	12	3UTR	MIRT525757	0	0
hsa-miR-144-5p	NM_000386	BLMH	GGATATCATCATATACTGTAAG#GGTGATATCCA#((((((((((............#)))))))))).	2235	2246	1.0	-15.9	1	0.001717451	0.529	0.0	0.0	-13.223621401949268	10	11	10	3UTR	MIRT559223	0	0
hsa-miR-144-5p	NM_000636	SOD2	GGATATCATCATATACTGTAAG#TTTATAGTATTCTCTGTGTACTCTGTATTTCTGTGGGATTGGTGGTGATATCCA#((((((((((((..........#.)))))))))))).	9271	9325	1.0	-18.3	1	0.0001851263	0.676	0.0	0.0	-7.052043616942562	12	14	12	3UTR	MIRT525757	0	0
hsa-miR-146a-5p	NM_001172085	TBP	TGAGAACTGAATTCCATGGGTT#CCCATGAACCACAGTTTTTAT#(((((((((.....((((((..#)))))).....))))))))).	1430	1451	0.9615384615384616	-17.5	1	0.03746962	0.765	1.569572888888889	1.7959713762499998	-13.4976292297232	15	21	9	3UTR	MIRT021257	0	0
hsa-miR-146a-5p	NM_005858	AKAP8	TGAGAACTGAATTCCATGGGTT#AGCCCAGGAGTTCAA#.......((((((((.((((((#)))))))))))))).	2968	2983	0.9615384615384616	-19.1	0	0.004304582	0.456	3.1392803750000002	1.95813247625	-17.34329401981838	14	15	14	3UTR	MIRT551937	0	0
hsa-miR-146a-5p	NM_001330543	EPSTI1	TGAGAACTGAATTCCATGGGTT#GACCCTGAACCAGTTCTCAG#(((((((((..(((...(((((#))))).))).))))))))).	1874	1894	1.0	-20.1	1	0.002128639	0.588	0.5114688333333333	0.7973004474999998	-8.973354030494443	17	20	9	3UTR	MIRT021269	0	0
hsa-miR-146a-5p	NM_001350167	USP48	TGAGAACTGAATTCCATGGGTT#CCTGTCCTCCATGTCACTGTTTCTTGGACCTCAGTTCTCT#.(((((((((..((((.(((..#.))).))))..))))))))).	4181	4221	1.0	-20.4	1	0.000406344	0.574	3.8092985555555554	2.7250389387499996	-9.964902622363823	16	21	9	3UTR	MIRT533311	0	0
hsa-miR-146a-5p	NM_001355239	ZNF738	TGAGAACTGAATTCCATGGGTT#CCCAGGTTCAAGCAGTTCTCC#.((((((((....((.((((..#))))))......)))))))).	1761	1782	1.0	-19.5	1	0.04125982	0.456	0.109357075	-0.15969369750000004	-12.729588783661859	14	21	8	3UTR	MIRT681545	0	0
hsa-miR-146a-5p	NM_001355240	ZNF738	TGAGAACTGAATTCCATGGGTT#CCCAGGTTCAAGCAGTTCTCC#.((((((((....((.((((..#))))))......)))))))).	521	542	1.0	-19.5	1	0.04125982	0.456	-0.13683217499999997	-0.308365400875	-12.729588783661859	14	21	8	3UTR	MIRT681545	0	0
hsa-miR-146a-5p	NM_001355241	ZNF738	TGAGAACTGAATTCCATGGGTT#CCCAGGTTCAAGCAGTTCTCC#.((((((((....((.((((..#))))))......)))))))).	2988	3009	1.0	-19.5	1	0.04125982	0.456	0.109357075	-0.15969369750000004	-12.729588783661859	14	21	8	3UTR	MIRT681545	0	0
hsa-miR-146a-5p	XM_017020855	EPSTI1	TGAGAACTGAATTCCATGGGTT#GACCCTGAACCAGTTCTCAG#(((((((((..(((...(((((#))))).))).))))))))).	2628	2648	1.0	-20.1	1	0.002128639	0.588	0.0	0.0	-8.973354030494443	17	20	9	3UTR	MIRT021269	0	0
hsa-miR-146a-5p	NM_182751	MCM10	TGAGAACTGAATTCCATGGGTT#ACTCCAGGTAAGTAGCTTAACTTCTGGGCTTCAGTTTTCT#.((((((((((.((((.(((((#.))))).)))).)))))))))).	3152	3192	1.0	-20.5	1	0.0003378356	0.603	0.0	0.0	-7.140128146953473	19	23	10	3UTR	MIRT021260	0	0
hsa-miR-146a-5p	NM_198189	COPS8	TGAGAACTGAATTCCATGGGTT#CCCTTTATTATCAGTTCTCAG#((((((((((.......(((..#))).......)))))))))).	3039	3060	1.0	-19.1	1	0.04719625	0.647	0.0	0.0	-13.223621401949268	13	21	10	3UTR	MIRT053496	0	1
hsa-miR-146a-5p	NM_001385161	MR1	TGAGAACTGAATTCCATGGGTT#GATCTATGGAGGTAGTCTCAC#((((.((((..(((((((((((#))))))))))).)))))))).	1732	1753	1.0	-20.1	0	0.0006517101	0.559	0.0	0.0	-12.123892564752666	19	21	11	3UTR	MIRT021255	0	1
hsa-miR-146a-5p	NM_001393937	MICAL2	TGAGAACTGAATTCCATGGGTT#GCCCATGGGGTTCT#........(((((((((((((.#))))))))))))).	8993	9007	1.0	-21.1	0	1.002786e-05	0.529	0.0	0.0	-19.423879868695398	13	14	13	3UTR	MIRT487736	0	0
hsa-miR-146a-5p	NM_016152	RARB	TGAGAACTGAATTCCATGGGTT#CCCAGTACCTTCAGTTCCAG#((.((((((((.....((((..#)))).....)))))))))).	1486	1506	1.0	-17.2	0	0.03639019	0.662	1.888083875	2.9518765485000005	-11.956386400845368	14	20	10	3UTR	MIRT734533	1	1
hsa-miR-146a-5p	NM_001194999	MR1	TGAGAACTGAATTCCATGGGTT#GATCTATGGAGGTAGTCTCAC#((((.((((..(((((((((((#))))))))))).)))))))).	1771	1792	1.0	-20.1	0	0.0006517101	0.559	0.5065516090909091	0.2907644775	-12.123892564752666	19	21	11	3UTR	MIRT021255	0	1
hsa-miR-146a-5p	NM_001204218	NOS1	TGAGAACTGAATTCCATGGGTT#ACCCGTGGAAAGCAGTGTCTG#..(((((((..((((((((((.#))))))))))..)))).))).	10524	10545	1.0	-23.8	1	0.0001910761	0.544	2.8841175000000003	3.35967751125	-9.02428166311082	17	21	10	3UTR	MIRT735124	0	1
hsa-miR-146a-5p	NM_001278558	WSB2	TGAGAACTGAATTCCATGGGTT#AGCCCAGGAGTTCAAGATCAG#(((....((((((((.((((((#))))))))))))))...))).	2389	2410	1.0	-20.3	0	0.01587571	0.456	-0.32476462500000003	0.10639603875000002	-14.766328272341307	17	21	14	3UTR	MIRT737644	0	0
hsa-miR-146a-5p	NM_001290216	RARB	TGAGAACTGAATTCCATGGGTT#CCCAGTACCTTCAGTTCCAG#((.((((((((.....((((..#)))).....)))))))))).	1888	1908	1.0	-17.2	0	0.03639019	0.662	2.43393125	2.9179127985000006	-11.956386400845368	14	20	10	3UTR	MIRT734533	1	1
hsa-miR-146a-5p	NM_001290217	RARB	TGAGAACTGAATTCCATGGGTT#CCCAGTACCTTCAGTTCCAG#((.((((((((.....((((..#)))).....)))))))))).	1301	1321	1.0	-17.2	0	0.03639019	0.662	1.888083875	2.9518765485000005	-11.956386400845368	14	20	10	3UTR	MIRT734533	1	1
hsa-miR-146a-5p	NM_001290277	RARB	TGAGAACTGAATTCCATGGGTT#CCCAGTACCTTCAGTTCCAG#((.((((((((.....((((..#)))).....)))))))))).	1705	1725	1.0	-17.2	0	0.03639019	0.662	1.888083875	2.9518765485000005	-11.956386400845368	14	20	10	3UTR	MIRT734533	1	1
hsa-miR-146a-5p	NM_018518	MCM10	TGAGAACTGAATTCCATGGGTT#ACTCCAGGTAAGTAGCTTAACTTCTGGGCTTCAGTTTTCT#.((((((((((.((((.(((((#.))))).)))).)))))))))).	3149	3189	1.0	-20.5	1	0.0003378356	0.603	-0.011070200000000007	-0.12355903124999998	-7.140128146953473	19	23	10	3UTR	MIRT021260	0	0
hsa-miR-146a-5p	NM_018639	WSB2	TGAGAACTGAATTCCATGGGTT#AGCCCAGGAGTTCAAGATCAG#(((....((((((((.((((((#))))))))))))))...))).	2766	2787	1.0	-20.3	0	0.01587571	0.456	-0.32476462500000003	0.10639603875000002	-14.766328272341307	17	21	14	3UTR	MIRT737644	0	0
hsa-miR-146a-5p	NM_021127	PMAIP1	TGAGAACTGAATTCCATGGGTT#GGAACAGTTAGTTCTCAT#((((((((((.((((.......#))))...)))))))))).	1341	1359	1.0	-17.1	1	0.0006099581	0.721	0.17597163	0.04978752000000003	-6.995398001915627	14	18	10	3UTR	MIRT387607	0	1
hsa-miR-146a-5p	NM_021959	PPP1R11	TGAGAACTGAATTCCATGGGTT#AGCCCAGATGTTCAGTTCTCT#.(((((((((((....((((((#))))))...))))))))))).	1451	1472	1.0	-24.8	1	0.003351776	0.456	0.08316393636363635	0.19934004	-6.907794008098015	17	21	11	3UTR	MIRT470477	1	1
hsa-miR-146a-5p	NM_024076	KCTD15	TGAGAACTGAATTCCATGGGTT#TGGTGCTCAGTTCTCAG#((((((((((...(((......#)))...)))))))))).	2580	2597	1.0	-18.3	1	0.003127468	0.471	2.0335989000000003	0.29891692499999994	-11.398282843874613	13	17	10	3UTR	MIRT081894	1	0
hsa-miR-146a-5p	NM_031200	CCR9	TGAGAACTGAATTCCATGGGTT#AGCCCTTGGATTTTCTCCATGCACTGTGAACTTCTGTGGCTTCAGTTCTCAT#(((((((((((..(((((((..#.))))))).))))))))))).	1560	1612	1.0	-22.8	1	0.002063168	0.5	-0.23350158181818187	-0.34844765499999997	-8.573508368464264	18	21	11	3UTR	MIRT021275	0	1
hsa-miR-146a-5p	NM_005192	CDKN3	TGAGAACTGAATTCCATGGGTT#AGCATATATATGACCATGTCTGAAATGTCAGTTCTCT#.(((((((((.((((((((...#.)))))...)))...))))))))).	713	750	1.0	-20.3	1	0.01079752	0.676	0.6399661111111111	1.19827154125	-6.618099312767468	17	25	9	3UTR	MIRT005705	0	0
hsa-miR-146a-5p	NM_005436	CCDC6	TGAGAACTGAATTCCATGGGTT#GCCTTCATGGTACAGTTCTCAG#(((((((((....((((((((.#)))..)))))..))))))))).	3463	3485	1.0	-21.1	1	0.0365331	0.662	1.6221014333333332	0.9392800862500001	-12.640789312202793	17	22	9	3UTR	MIRT437618	1	1
hsa-miR-146a-5p	NM_005436	CCDC6	TGAGAACTGAATTCCATGGGTT#ACCTATGGGAAGCTGACTTCCCTCAGTCGGGCACTTCTCAT#((((((((((.((((((((((.#))))))))))............)))))........))))).	4041	4082	1.0	-18.4	1	0.004674899	0.441	3.8429187000000007	3.22982611	-6.7623489216120145	20	41	10	3UTR	MIRT437618	1	1
hsa-miR-146a-5p	NM_005901	SMAD2	TGAGAACTGAATTCCATGGGTT#CCCATGATTCAGTTACCTCTCAC#((((((((((((..((((((..#)))))))))))))....))))).	31404	31427	1.0	-20.3	1	0.03733308	0.515	0.36844098750000004	0.4497838750000001	-6.083544976388314	18	23	13	3UTR	MIRT054772	0	0
hsa-miR-146a-5p	NM_006641	CCR9	TGAGAACTGAATTCCATGGGTT#AGCCCTTGGATTTTCTCCATGCACTGTGAACTTCTGTGGCTTCAGTTCTCAT#(((((((((((..(((((((..#.))))))).))))))))))).	1511	1563	1.0	-22.8	1	0.002063168	0.5	-0.23350158181818187	-0.34844765499999997	-8.573508368464264	18	21	11	3UTR	MIRT021275	0	1
hsa-miR-146a-5p	NM_006710	COPS8	TGAGAACTGAATTCCATGGGTT#CCCTTTATTATCAGTTCTCAG#((((((((((.......(((..#))).......)))))))))).	2974	2995	1.0	-19.1	1	0.04719625	0.647	-0.4868154800000001	-0.09003467	-13.223621401949268	13	21	10	3UTR	MIRT053496	0	1
hsa-miR-146a-5p	XM_005246377	ERBB4	TGAGAACTGAATTCCATGGGTT#CCCAGAGATCTGAGTTCTCT#.(((((((.(..((..((((..#))))..))..).))))))).	9141	9161	1.0	-19.4	1	0.0001346533	0.618	0.0	0.0	-11.989790921163834	14	20	7	3UTR	MIRT005806	1	1
hsa-miR-146a-5p	NM_001080417	ZNF629	TGAGAACTGAATTCCATGGGTT#AGCCCTGGACAGTTCTCAT#(((((((((...((((.(((((#)))))))))))))))))).	3310	3329	1.0	-23.9	1	0.0004786049	0.426	0.19901566666666662	0.659796025	-11.35165869953655	18	19	18	3UTR	MIRT616849	0	0
hsa-miR-146a-5p	NM_001129995	KCTD15	TGAGAACTGAATTCCATGGGTT#TGGTGCTCAGTTCTCAG#((((((((((...(((......#)))...)))))))))).	1578	1595	1.0	-18.3	1	0.003127468	0.471	2.0335989000000003	0.29891692499999994	-11.398282843874613	13	17	10	3UTR	MIRT081894	1	0
hsa-miR-146a-5p	NM_001130851	CDKN3	TGAGAACTGAATTCCATGGGTT#AGCATATATATGACCATGTCTGAAATGTCAGTTCTCT#.(((((((((.((((((((...#.)))))...)))...))))))))).	593	630	1.0	-20.3	1	0.01079752	0.676	1.0243235444444443	2.0592039	-6.618099312767468	17	25	9	3UTR	MIRT005705	0	0
hsa-miR-146a-5p	NM_032236	USP48	TGAGAACTGAATTCCATGGGTT#CCTGTCCTCCATGTCACTGTTTCTTGGACCTCAGTTCTCT#.(((((((((..((((.(((..#.))).))))..))))))))).	4184	4224	1.0	-20.4	1	0.000406344	0.574	3.8092985555555554	2.7250389387499996	-9.964902622363823	16	21	9	3UTR	MIRT533311	0	0
hsa-miR-146a-5p	NM_033255	EPSTI1	TGAGAACTGAATTCCATGGGTT#GACCCTGAACCAGTTCTCAG#(((((((((..(((...(((((#))))).))).))))))))).	1841	1861	1.0	-20.1	1	0.002128639	0.588	0.5274710333333332	0.53267128875	-8.973354030494443	17	20	9	3UTR	MIRT021269	0	0
hsa-miR-146a-5p	NM_145255	MRPL10	TGAGAACTGAATTCCATGGGTT#GCTTGGATGTTAGTTCTCC#.(((((((((..((((..(((.#)))))))..))))))))).	1476	1495	1.0	-18.2	1	0.000617747	0.485	1.7030298888888888	1.6224334699999998	-9.964902622363823	16	19	9	3UTR	MIRT693789	0	0
hsa-miR-146a-5p	NM_148887	MRPL10	TGAGAACTGAATTCCATGGGTT#GCTTGGATGTTAGTTCTCC#.(((((((((..((((..(((.#)))))))..))))))))).	1574	1593	1.0	-18.2	1	0.000617747	0.485	4.195715333333334	3.3719182750000005	-9.964902622363823	16	19	9	3UTR	MIRT693789	0	0
hsa-miR-146a-5p	NM_001303500	SAMD9L	TGAGAACTGAATTCCATGGGTT#CTCATGGTAATATGTGTTCTCAA#(((((((...((((((((((..#))))))).)))....))))))).	6177	6200	1.0	-18.9	1	0.04705786	0.559	1.017591727272727	0.29025473875	-8.550105501956237	17	23	7	3UTR	MIRT021276	0	0
hsa-miR-146a-5p	NM_001330394	USP48	TGAGAACTGAATTCCATGGGTT#CCTGTCCTCCATGTCACTGTTTCTTGGACCTCAGTTCTCT#.(((((((((..((((.(((..#.))).))))..))))))))).	4028	4068	1.0	-20.4	1	0.000406344	0.574	0.0	0.0	-9.964902622363823	16	21	9	3UTR	MIRT533311	0	0
hsa-miR-146a-5p	NM_000609	CXCL12	TGAGAACTGAATTCCATGGGTT#AGCCCAAGGGAATTCGGTGTGCAC#((...((((((((((.((((((#))))))..))))))))))...)).	1393	1417	1.0	-23.2	0	0.0007684276	0.368	0.0	0.0	-12.87922245058339	18	24	10	3UTR	MIRT438058	0	0
hsa-miR-146a-5p	NM_000620	NOS1	TGAGAACTGAATTCCATGGGTT#ACCCGTGGAAAGCAGTGTCTG#..(((((((..((((((((((.#))))))))))..)))).))).	10422	10443	1.0	-23.8	1	0.0001910761	0.544	0.0	0.0	-9.02428166311082	17	21	10	3UTR	MIRT735124	0	1
hsa-miR-146a-5p	NM_001002264	EPSTI1	TGAGAACTGAATTCCATGGGTT#GACCCTGAACCAGTTCTCAG#(((((((((..(((...(((((#))))).))).))))))))).	1906	1926	1.0	-20.1	1	0.002128639	0.588	0.0	0.0	-8.973354030494443	17	20	9	3UTR	MIRT021269	0	0
hsa-miR-148a-3p	NM_002116	HLA-A	TCAGTGCACTACAGAACTTTGT#GCTGAGGTGTCTCCATCTCTGTCTCAACTTCATGGTGCACTGAG#(((((((((((((((.......#.)))))...........)))))))))).	1349	1393	0.9615384615384616	-20.2	1	0.00738136	0.574	1.3139686538461537	2.35811429375	-4.1706235265052785	15	28	10	3UTR	MIRT218522	0	1
hsa-miR-148a-3p	XM_017012183	ITGB8	TCAGTGCACTACAGAACTTTGT#TCTGAAGAGCACTGAT#(((((((.((.((((.......#)))).)).))))))).	2628	2644	0.9743589743589743	-17.2	1	0.02930766	0.588	0.0	0.0	-9.30903293109626	13	16	7	3UTR	MIRT053478	1	1
hsa-miR-148a-3p	NM_001347723	DYRK1A	TCAGTGCACTACAGAACTTTGT#GGTGCACTGAG#((((((((((............#)))))))))).	3862	3873	1.0	-17.1	1	0.009572917	0.441	5.057726	5.585849787499999	-13.223621401949268	10	11	10	3UTR	MIRT026006	1	1
hsa-miR-148a-3p	NM_001363582	MAP3K4	TCAGTGCACTACAGAACTTTGT#GCGTCCCATACCTTGTTTTTAATCTCCTGTTTGTTGAGTGCACTGAC#(((((((((((((((.......#.)))))..)))))))))).	5173	5220	1.0	-19.3	1	0.008549611	0.647	0.0	0.0	-4.1706235265052785	15	19	10	3UTR	MIRT048040	1	1
hsa-miR-148a-3p	XM_017025749	SMAD2	TCAGTGCACTACAGAACTTTGT#CTGTGGTGTACA#...(((((((((((........#))))))))))).	5332	5344	1.0	-18.0	0	0.002650893	0.676	0.0	0.0	-7.483038834232987	11	12	11	3UTR	MIRT053560	1	0
hsa-miR-148a-3p	XM_024447701	PGAP4	TCAGTGCACTACAGAACTTTGT#ACCTGGGATTTTCTTTTCCTATATATCTGTAGTGCACTGAT#(((((((((((((((.......#.))))))))))))))).	3037	3078	1.0	-27.1	1	0.008949258	0.676	0.0	0.0	-4.1706235265052785	15	17	15	3UTR	MIRT762752	0	1
hsa-miR-148a-3p	XM_047437507	SMAD2	TCAGTGCACTACAGAACTTTGT#CTGTGGTGTACA#...(((((((((((........#))))))))))).	5430	5442	1.0	-18.0	0	0.002650893	0.676	0.0	0.0	-7.483038834232987	11	12	11	3UTR	MIRT053560	1	0
hsa-miR-148a-3p	NM_153453	VGLL2	TCAGTGCACTACAGAACTTTGT#TCTGTGGTGAGATTGCTGAG#(((((((((((((((.......#)))))))))....)))))).	880	900	1.0	-17.4	1	0.0003893865	0.574	0.726756694736842	0.82090661	-4.1706235265052785	15	20	9	3UTR	MIRT693776	0	0
hsa-miR-148a-3p	NM_177422	AGO3	TCAGTGCACTACAGAACTTTGT#CTGTAGTGTATTCCACTGAG#((((((((((((((........#)))))))).....)))))).	11481	11501	1.0	-18.3	1	0.001202113	0.603	0.0	0.0	-4.906073086755913	14	20	8	3UTR	MIRT559687	1	0
hsa-miR-148a-3p	NM_177559	CSNK2A1	TCAGTGCACTACAGAACTTTGT#ACAGAGTTCTGTCTGGCAGTGT#.((.(((...((((((((((((#))))))))))))...))).)).	5877	5899	1.0	-22.7	0	0.001351567	0.588	0.0	0.0	-11.437878168070881	17	22	12	3UTR	MIRT737666	1	0
hsa-miR-148a-3p	NM_177560	CSNK2A1	TCAGTGCACTACAGAACTTTGT#ACAGAGTTCTGTCTGGCAGTGT#.((.(((...((((((((((((#))))))))))))...))).)).	5550	5572	1.0	-22.7	0	0.001351567	0.588	-0.475959575	-0.11721500124999999	-11.437878168070881	17	22	12	3UTR	MIRT737666	1	0
hsa-miR-148a-3p	NM_182645	VGLL2	TCAGTGCACTACAGAACTTTGT#TCTGTGGTGAGATTGCTGAG#(((((((((((((((.......#)))))))))....)))))).	1402	1422	1.0	-17.4	1	0.0003893865	0.574	0.726756694736842	0.82090661	-4.1706235265052785	15	20	9	3UTR	MIRT693776	0	0
hsa-miR-148a-3p	NM_001382620	FURIN	TCAGTGCACTACAGAACTTTGT#GTGGTGGCACTGAG#((((((((((((..........#)))))).)))))).	3804	3818	1.0	-18.0	1	8.821389e-06	0.353	0.0	0.0	-7.052043616942562	12	14	6	3UTR	MIRT737667	0	0
hsa-miR-148a-3p	NM_015346	ZFYVE26	TCAGTGCACTACAGAACTTTGT#GCATGTTCCTGTGCGCTGAT#(((((((((....((((..(((#))).))))..))))))))).	8040	8060	1.0	-19.0	1	0.001014729	0.529	2.6868888888888893	3.044922375	-12.640789312202793	16	20	9	3UTR	MIRT484939	1	1
hsa-miR-148a-3p	NM_015375	DSTYK	TCAGTGCACTACAGAACTTTGT#GCAAAGTGACAACTGCACTGAA#((((((((.......(((((((#)))))))......)))))))).	6820	6842	1.0	-19.0	1	0.0006257116	0.544	1.051751375	2.7705566075000005	-15.289468448219598	15	22	8	3UTR	MIRT026003	1	1
hsa-miR-148a-3p	NM_018107	RBM23	TCAGTGCACTACAGAACTTTGT#AGGCTGGGTGCACTGGC#((((((((((.(((..((....#)).))))))))))))).	3486	3503	1.0	-18.2	1	2.415301e-06	0.5	1.43027848	0.688451199	-7.730847562166263	15	17	13	3UTR	MIRT525443	0	0
hsa-miR-148a-3p	NM_001201	BMP3	TCAGTGCACTACAGAACTTTGT#ACACACCAGTTCTAAAAAAAATGAGTGAAGTTCTGGTGCCTGAG#((((.((((..(((((((((..#.))))))))))))))))).	3837	3881	1.0	-21.5	0	0.007746487	0.618	-0.04323888888888894	-0.14401341599999998	-12.123892564752666	17	19	17	3UTR	MIRT549174	1	1
hsa-miR-148a-3p	NM_001243280	ALCAM	TCAGTGCACTACAGAACTTTGT#ACTGTCTGGGCAATAGTGACTCCGTTTAATAAAAGCTTCCGTAGTGCATTGGT#((((((((((((.(((((((..#.)))).))).)))))))))))).	3777	3830	1.0	-22.7	1	0.002263176	0.676	3.1769456666666667	2.7863206	-5.226705058867908	19	23	12	3UTR	MIRT732662	1	1
hsa-miR-148a-3p	NM_001243299	APLP2	TCAGTGCACTACAGAACTTTGT#CTGTGGTGTATTT#..((((((((((((........#)))))))))))).	3506	3519	1.0	-16.4	1	0.03501682	0.691	2.770322833333333	0.5323247337500001	-5.925499359926538	12	13	12	3UTR	MIRT737664	0	0
hsa-miR-148a-3p	NM_001261400	PSMD9	TCAGTGCACTACAGAACTTTGT#GCCTTGACGCTGTGGGCACTGC#.((((((.((((((........#.)))))))))))).	1195	1217	1.0	-18.6	1	8.133239e-05	0.412	0.261496	0.031058499875	-7.075458407091997	12	14	12	3UTR	MIRT025995	0	1
hsa-miR-148a-3p	NM_001289823	FURIN	TCAGTGCACTACAGAACTTTGT#GTGGTGGCACTGAG#((((((((((((..........#)))))).)))))).	3811	3825	1.0	-18.0	1	8.821389e-06	0.353	0.0	0.0	-7.052043616942562	12	14	6	3UTR	MIRT737667	0	0
hsa-miR-148a-3p	NM_001289824	FURIN	TCAGTGCACTACAGAACTTTGT#GTGGTGGCACTGAG#((((((((((((..........#)))))).)))))).	3990	4004	1.0	-18.0	1	8.821389e-06	0.353	0.21598777692307683	0.5267752512499999	-7.052043616942562	12	14	6	3UTR	MIRT737667	0	0
hsa-miR-148a-3p	NM_020801	ARRDC3	TCAGTGCACTACAGAACTTTGT#GTTTTGTTGCACTGT#.(((((((..(((((((.....#)))))))))))))).	2348	2363	1.0	-17.3	1	0.006808218	0.676	2.1049842857142855	2.2621754225000004	-6.09222096393106	14	15	14	3UTR	MIRT026009	1	1
hsa-miR-148a-3p	NM_022002	NR1I2	TCAGTGCACTACAGAACTTTGT#AGTGCACTGAC#((((((((((............#)))))))))).	1702	1713	1.0	-16.8	1	0.001064113	0.456	-0.16279150000000003	-0.08683242	-13.223621401949268	10	11	10	3UTR	MIRT003998	0	0
hsa-miR-148a-3p	NM_024546	OBI1	TCAGTGCACTACAGAACTTTGT#GTGCACTGAA#(((((((((.............#))))))))).	3412	3422	1.0	-16.0	1	0.002305939	0.735	3.498890888888889	3.9554074675	-14.466127870277449	9	10	9	3UTR	MIRT561658	1	1
hsa-miR-148a-3p	NM_024852	AGO3	TCAGTGCACTACAGAACTTTGT#CTGTAGTGTATTCCACTGAG#((((((((((((((........#)))))))).....)))))).	11739	11759	1.0	-18.3	1	0.001202113	0.603	0.20698869473684212	0.5815798799999999	-4.906073086755913	14	20	8	3UTR	MIRT559687	1	0
hsa-miR-148a-3p	NM_001145408	NONO	TCAGTGCACTACAGAACTTTGT#ACAAGTCAATTCTGTGTGGTATATTGTTTAATCAGTTCTGTGTGGTGCATTCCTGAA#((((((((((((((((((....#.))))))))..))))))...)))).	1855	1912	1.0	-21.3	1	0.000886219	0.559	1.5034691173913046	1.9046806175	-3.937574446201665	18	25	8	3UTR	MIRT048042	0	0
hsa-miR-148a-3p	NM_001145409	NONO	TCAGTGCACTACAGAACTTTGT#ACAAGTCAATTCTGTGTGGTATATTGTTTAATCAGTTCTGTGTGGTGCATTCCTGAA#((((((((((((((((((....#.))))))))..))))))...)))).	1684	1741	1.0	-21.3	1	0.000886219	0.559	1.5034691173913046	1.9046806175	-3.937574446201665	18	25	8	3UTR	MIRT048042	0	0
hsa-miR-148a-3p	NM_001164746	RASSF8	TCAGTGCACTACAGAACTTTGT#GTGCACTGAT#(((((((((.............#))))))))).	1953	1963	1.0	-15.8	1	0.004640256	0.588	3.2679414444444443	1.08280968625	-14.466127870277449	9	10	9	3UTR	MIRT026013	1	1
hsa-miR-148a-3p	NM_001164748	RASSF8	TCAGTGCACTACAGAACTTTGT#GTGCACTGAT#(((((((((.............#))))))))).	1987	1997	1.0	-15.8	1	0.004640256	0.588	3.2679414444444443	1.08280968625	-14.466127870277449	9	10	9	3UTR	MIRT026013	1	1
hsa-miR-148a-3p	NM_005544	IRS1	TCAGTGCACTACAGAACTTTGT#ATAAAGGTAGAAATTCTTATTTAAGCTGCTTCTAGTGGTGCCTGAG#((((.(((((((((((......#.)))).))))))))))).	7202	7248	1.0	-19.2	0	0.00217752	0.574	0.8121336333333334	1.386423015	-8.056611621014136	15	18	11	3UTR	MIRT006859	0	1
hsa-miR-148a-3p	NM_005888	SLC25A3	TCAGTGCACTACAGAACTTTGT#AGGTTTTATTTGTGGGCATTGAT#(((((((.(((((((.......#.)))))))))))))).	3291	3314	1.0	-17.1	1	0.004061807	0.647	0.0	0.0	-6.484258455685908	14	16	14	3UTR	MIRT048032	0	0
hsa-miR-148a-3p	NM_005922	MAP3K4	TCAGTGCACTACAGAACTTTGT#GCGTCCCATACCTTGTTTTTAATCTCCTGTTTGTTGAGTGCACTGAC#(((((((((((((((.......#.)))))..)))))))))).	5335	5382	1.0	-19.3	1	0.008549611	0.647	2.0391261176470588	1.9187344150000003	-4.1706235265052785	15	19	10	3UTR	MIRT048040	1	1
hsa-miR-148a-3p	NM_006724	MAP3K4	TCAGTGCACTACAGAACTTTGT#GCGTCCCATACCTTGTTTTTAATCTCCTGTTTGTTGAGTGCACTGAC#(((((((((((((((.......#.)))))..)))))))))).	5185	5232	1.0	-19.3	1	0.008549611	0.647	1.5078673647058825	1.3874741825000005	-4.1706235265052785	15	19	10	3UTR	MIRT048040	1	1
hsa-miR-148a-3p	NM_007363	NONO	TCAGTGCACTACAGAACTTTGT#ACAAGTCAATTCTGTGTGGTATATTGTTTAATCAGTTCTGTGTGGTGCATTCCTGAA#((((((((((((((((((....#.))))))))..))))))...)))).	1741	1798	1.0	-21.3	1	0.000886219	0.559	1.5034691173913046	1.9046806175	-3.937574446201665	18	25	8	3UTR	MIRT048042	0	0
hsa-miR-148a-3p	NM_012437	SNAPIN	TCAGTGCACTACAGAACTTTGT#GCAAAGTCAAAGTGAATGACCTCTGTCCACCCACTTTTTTATTGCACTGGC#((((((((..((((((((((((#)))))))..............)))))................)))))))).	874	925	1.0	-16.6	1	0.03441998	0.588	0.21060098076923078	0.52414505375	-6.236470572775607	20	51	8	3UTR	MIRT025994	0	1
hsa-miR-148a-3p	NM_001642	APLP2	TCAGTGCACTACAGAACTTTGT#CTGTGGTGTATTT#..((((((((((((........#)))))))))))).	3551	3564	1.0	-16.4	1	0.03501682	0.691	0.0	0.0	-5.925499359926538	12	13	12	3UTR	MIRT737664	0	0
hsa-miR-148a-3p	NM_001895	CSNK2A1	TCAGTGCACTACAGAACTTTGT#ACAGAGTTCTGTCTGGCAGTGT#.((.(((...((((((((((((#))))))))))))...))).)).	5760	5782	1.0	-22.7	0	0.001351567	0.588	0.0	0.0	-11.437878168070881	17	22	12	3UTR	MIRT737666	1	0
hsa-miR-148a-3p	NM_002117	HLA-C	TCAGTGCACTACAGAACTTTGT#TCTGTCTCAAATTCATGGTGCACTGAG#(((((((((((..(((.((((.#.))))))).))))))))))).	1367	1394	1.0	-20.1	1	0.004046371	0.574	-0.2105731681818181	-0.78369679	-8.573508368464264	18	21	11	3UTR	MIRT487938	0	0
hsa-miR-148a-3p	NM_002154	HSPA4	TCAGTGCACTACAGAACTTTGT#TAAAGAAGTGTGGTGCCTGAT#((((.((((((((...(((((.#)))))...)))))))))))).	3801	3822	1.0	-20.5	0	0.03101321	0.632	0.0	0.0	-9.881950179088792	17	21	12	3UTR	MIRT048037	0	0
hsa-miR-148a-3p	NM_002268	KPNA4	TCAGTGCACTACAGAACTTTGT#GCAAAGTTCTGTAAACACCGTGAA#((((((...(((((((((((((#)))))))))))))..)))..))).	8882	8906	1.0	-19.6	0	0.03331345	0.588	0.0	0.0	-8.851285568499378	19	24	13	3UTR	MIRT522804	1	0
hsa-miR-148a-3p	NM_002296	LBR	TCAGTGCACTACAGAACTTTGT#ACTTTCTTTTGTTGCACTGAC#((((((((..((((((......#.)))))))))))))).	2022	2043	1.0	-15.8	1	0.01096218	0.676	0.0	0.0	-6.236470572775607	14	16	14	3UTR	MIRT026004	1	1
hsa-miR-148a-3p	NM_002569	FURIN	TCAGTGCACTACAGAACTTTGT#GTGGTGGCACTGAG#((((((((((((..........#)))))).)))))).	3869	3883	1.0	-18.0	1	8.821389e-06	0.353	0.0	0.0	-7.052043616942562	12	14	6	3UTR	MIRT737667	0	0
hsa-miR-148a-3p	NM_002635	SLC25A3	TCAGTGCACTACAGAACTTTGT#AGGTTTTATTTGTGGGCATTGAT#(((((((.(((((((.......#.)))))))))))))).	3288	3311	1.0	-17.1	1	0.004061807	0.647	0.0	0.0	-6.484258455685908	14	16	14	3UTR	MIRT048032	0	0
hsa-miR-148a-3p	NM_002813	PSMD9	TCAGTGCACTACAGAACTTTGT#GCCTTGACGCTGTGGGCACTGC#.((((((.((((((........#.)))))))))))).	1510	1532	1.0	-18.6	1	8.133239e-05	0.412	0.0	0.0	-7.075458407091997	12	14	12	3UTR	MIRT025995	0	1
hsa-miR-148a-3p	NM_004064	CDKN1B	TCAGTGCACTACAGAACTTTGT#CTGTATAAGCACTGAA#(((((((..(((((........#)))))...))))))).	1188	1204	1.0	-16.0	1	0.04922008	0.662	0.7513787142857142	0.9203095149999999	-8.276097674182306	12	16	7	3UTR	MIRT053475	1	1
hsa-miR-148a-3p	NM_004561	OVOL1	TCAGTGCACTACAGAACTTTGT#TTGTGTGTGTGCACTGC#.((((((((((((.((......#)).)))).)))))))).	1695	1712	1.0	-17.8	1	1.528131e-06	0.412	3.2786524615384613	3.8698444229999995	-4.650164754877524	14	17	8	3UTR	MIRT723186	0	0
hsa-miR-148a-3p	NM_206853	QKI	TCAGTGCACTACAGAACTTTGT#ACTGTCTCTTGAAGTTCTGTGGTGGTATGAG#(((...((((((((((((((..#.))))))))))))))...))).	2942	2973	1.0	-23.9	0	0.006169005	0.618	1.1252081285714286	1.84346675875	-12.989592657166373	17	22	14	3UTR	MIRT735024	1	1
hsa-miR-148a-3p	NM_206854	QKI	TCAGTGCACTACAGAACTTTGT#ACTGTCTCTTGAAGTTCTGTGGTGGTATGAG#(((...((((((((((((((..#.))))))))))))))...))).	4221	4252	1.0	-23.9	0	0.006169005	0.618	1.1252081285714286	1.84346675875	-12.989592657166373	17	22	14	3UTR	MIRT735024	1	1
hsa-miR-148a-3p	NM_206855	QKI	TCAGTGCACTACAGAACTTTGT#ACTGTCTCTTGAAGTTCTGTGGTGGTATGAG#(((...((((((((((((((..#.))))))))))))))...))).	5168	5199	1.0	-23.9	0	0.006169005	0.618	1.1252081285714286	1.84346675875	-12.989592657166373	17	22	14	3UTR	MIRT735024	1	1
hsa-miR-148a-3p	XM_006723977	DYRK1A	TCAGTGCACTACAGAACTTTGT#GGTGCACTGAG#((((((((((............#)))))))))).	3232	3243	1.0	-17.1	1	0.009572917	0.441	0.0	0.0	-13.223621401949268	10	11	10	3UTR	MIRT026006	1	1
hsa-miR-148a-3p	NM_001077351	RBM23	TCAGTGCACTACAGAACTTTGT#AGGCTGGGTGCACTGGC#((((((((((.(((..((....#)).))))))))))))).	3534	3551	1.0	-18.2	1	2.415301e-06	0.5	0.002667400000000003	0.5675176225	-7.730847562166263	15	17	13	3UTR	MIRT525443	0	0
hsa-miR-148a-3p	NM_001077352	RBM23	TCAGTGCACTACAGAACTTTGT#AGGCTGGGTGCACTGGC#((((((((((.(((..((....#)).))))))))))))).	3432	3449	1.0	-18.2	1	2.415301e-06	0.5	1.5836574200000002	1.5563733182500004	-7.730847562166263	15	17	13	3UTR	MIRT525443	0	0
hsa-miR-148a-3p	NM_001080121	PRNP	TCAGTGCACTACAGAACTTTGT#GTGCACTGAA#(((((((((.............#))))))))).	2254	2264	1.0	-16.0	1	0.002040143	0.559	0.5020066666666667	0.6304006312500001	-14.466127870277449	9	10	9	3UTR	MIRT026010	1	1
hsa-miR-148a-3p	NM_001080123	PRNP	TCAGTGCACTACAGAACTTTGT#GTGCACTGAA#(((((((((.............#))))))))).	2483	2493	1.0	-16.0	1	0.002040143	0.559	0.5020066666666667	0.6304006312500001	-14.466127870277449	9	10	9	3UTR	MIRT026010	1	1
hsa-miR-148a-3p	NM_001127500	MET	TCAGTGCACTACAGAACTTTGT#ACAGGATCTCACTCTGTTGCCAGGGCTGTAGTGCAGTGGT#(((.((((((((((..((....#.))..)))))))))).))).	5155	5195	1.0	-24.0	0	4.989737e-06	0.456	-0.42217740000000015	0.4221782963749999	-7.938095361715103	15	20	10	3UTR	MIRT054388	1	1
hsa-miR-148a-3p	NM_001142276	APLP2	TCAGTGCACTACAGAACTTTGT#CTGTGGTGTATTT#..((((((((((((........#)))))))))))).	3515	3528	1.0	-16.4	1	0.03501682	0.691	2.770322833333333	0.5323247337500001	-5.925499359926538	12	13	12	3UTR	MIRT737664	0	0
hsa-miR-148a-3p	NM_001142277	APLP2	TCAGTGCACTACAGAACTTTGT#CTGTGGTGTATTT#..((((((((((((........#)))))))))))).	3347	3360	1.0	-16.4	1	0.03501682	0.691	2.770322833333333	0.5323247337500001	-5.925499359926538	12	13	12	3UTR	MIRT737664	0	0
hsa-miR-148a-3p	NM_001142278	APLP2	TCAGTGCACTACAGAACTTTGT#CTGTGGTGTATTT#..((((((((((((........#)))))))))))).	2828	2841	1.0	-16.4	1	0.03501682	0.691	2.770322833333333	0.5323247337500001	-5.925499359926538	12	13	12	3UTR	MIRT737664	0	0
hsa-miR-148a-3p	NM_032342	PGAP4	TCAGTGCACTACAGAACTTTGT#ACCTGGGATTTTCTTTTCCTATATATCTGTAGTGCACTGAT#(((((((((((((((.......#.))))))))))))))).	2093	2134	1.0	-27.1	1	0.008949258	0.676	-0.10592660000000001	0.13455835250000003	-4.1706235265052785	15	17	15	3UTR	MIRT762752	0	1
hsa-miR-148a-3p	NM_033132	ZIC5	TCAGTGCACTACAGAACTTTGT#GTTTTGTGTGCTGTGAG#(((..((((.(((((((.....#)))))))))))..))).	3584	3601	1.0	-16.5	0	0.1223593	0.618	1.2841764857142854	1.7742143725000001	-12.331140364301508	14	17	11	3UTR	MIRT463247	0	0
hsa-miR-148a-3p	NM_033141	MAP3K9	TCAGTGCACTACAGAACTTTGT#GTTCTGTGGTCCTGGT#((((.(.((((((((((.....#))))))))))))))).	6517	6533	1.0	-18.2	0	0.007903504	0.441	-0.08662956000000004	0.33383654375	-9.600298155885454	15	16	15	3UTR	MIRT473770	1	1
hsa-miR-148a-3p	NM_033141	MAP3K9	TCAGTGCACTACAGAACTTTGT#TGTAGTGTAACTGAA#(((((((((((((.........#))))))))).)))).	6190	6205	1.0	-17.0	1	0.08953339	0.588	-0.280425292857143	0.20362821624999997	-5.762913004276319	13	15	9	3UTR	MIRT473770	1	1
hsa-miR-148a-3p	NM_001301072	MAP3K4	TCAGTGCACTACAGAACTTTGT#GCGTCCCATACCTTGTTTTTAATCTCCTGTTTGTTGAGTGCACTGAC#(((((((((((((((.......#.)))))..)))))))))).	5323	5370	1.0	-19.3	1	0.008549611	0.647	1.5078673647058825	1.3874741825000005	-4.1706235265052785	15	19	10	3UTR	MIRT048040	1	1
hsa-miR-148a-3p	NM_001308044	RBM23	TCAGTGCACTACAGAACTTTGT#AGGCTGGGTGCACTGGC#((((((((((.(((..((....#)).))))))))))))).	3373	3390	1.0	-18.2	1	2.415301e-06	0.5	1.2297036000000001	1.2311789116249998	-7.730847562166263	15	17	13	3UTR	MIRT525443	0	0
hsa-miR-148a-3p	NM_001313893	HMGB1	TCAGTGCACTACAGAACTTTGT#GCATGGAAATTTAAAGCAGGTTCTTGTTGGTGCACA#...((((((((((((((.((((#.))))))))).)).))))))).	1830	1866	1.0	-20.1	0	0.0003030964	0.618	0.174328105	0.18394351800000003	-6.514540193678739	18	22	9	3UTR	MIRT048039	0	0
hsa-miR-148a-3p	NM_000245	MET	TCAGTGCACTACAGAACTTTGT#ACAGGATCTCACTCTGTTGCCAGGGCTGTAGTGCAGTGGT#(((.((((((((((..((....#.))..)))))))))).))).	5101	5141	1.0	-24.0	0	4.989737e-06	0.456	-0.42217740000000015	0.4221782963749999	-7.938095361715103	15	20	10	3UTR	MIRT054388	1	1
hsa-miR-148a-3p	NM_000311	PRNP	TCAGTGCACTACAGAACTTTGT#GTGCACTGAA#(((((((((.............#))))))))).	2259	2269	1.0	-16.0	1	0.002040143	0.559	0.0	0.0	-14.466127870277449	9	10	9	3UTR	MIRT026010	1	1
hsa-miR-148a-3p	NM_001030059	PLPP4	TCAGTGCACTACAGAACTTTGT#ACATCATAACACAATAGAAATGGTTTTCTGTAGTGTATTT#..((((((((((((((......#.)))))))))))))).	946	986	1.0	-19.1	1	0.0197509	0.691	0.0	0.0	-4.95700071937229	14	16	14	3UTR	MIRT625516	0	0
hsa-miR-15b-3p	XM_047436178	MINK1	CGAATCATTATTTGCTGCTCTA#GAGCAGCAAGTAACCCTTCT#.(((...(((((((((((((..#)))))))))))))...))).	4736	4756	1.0	-21.1	0	0.09855839	0.471	0.0	0.0	-11.357007308233957	16	20	13	3UTR	MIRT146636	0	0
hsa-miR-15b-3p	NM_153827	MINK1	CGAATCATTATTTGCTGCTCTA#GAGCAGCAAGTAACCCTTCT#.(((...(((((((((((((..#)))))))))))))...))).	4916	4936	1.0	-21.1	0	0.09855839	0.471	2.7465164615384614	1.3617373925	-11.357007308233957	16	20	13	3UTR	MIRT146636	0	0
hsa-miR-15b-3p	NM_170663	MINK1	CGAATCATTATTTGCTGCTCTA#GAGCAGCAAGTAACCCTTCT#.(((...(((((((((((((..#)))))))))))))...))).	4829	4849	1.0	-21.1	0	0.09855839	0.471	2.7465164615384614	1.3617373925	-11.357007308233957	16	20	13	3UTR	MIRT146636	0	0
hsa-miR-15b-3p	NM_032528	ST6GAL2	CGAATCATTATTTGCTGCTCTA#GAGCAGCAATGACAATTCA#.((((..(((.(((((((((..#))))))))))))..)))).	4863	4882	1.0	-19.0	0	0.05378481	0.676	0.6091772222222223	0.72432815625	-10.062744608831833	16	19	12	3UTR	MIRT446135	0	0
hsa-miR-15b-3p	NM_033515	ARHGAP18	CGAATCATTATTTGCTGCTCTA#TAGGAGTATACAACTTCAAAAAAAAAGATAGCAGTGAGGATAATGATTTA#.((((((((((((((((((...#.))))))..)))))))))))).	3788	3838	1.0	-18.6	1	0.06367134	0.691	0.8369292399999999	2.144091887875	-3.793324837357118	18	22	12	3UTR	MIRT610623	0	0
hsa-miR-15b-3p	NM_001024937	MINK1	CGAATCATTATTTGCTGCTCTA#GAGCAGCAAGTAACCCTTCT#.(((...(((((((((((((..#)))))))))))))...))).	4856	4876	1.0	-21.1	0	0.09855839	0.471	0.0	0.0	-11.357007308233957	16	20	13	3UTR	MIRT146636	0	0
hsa-miR-16-2-3p	NM_001375462	LPP	CCAATATTACTGTGCTGCTTTA#GGGGCAGCATGTTAGTTTTGGG#((((.((((.(((((((((((.#))))))))))).)))).)))).	4127	4149	1.0	-20.9	0	0.003584587	0.559	0.0	0.0	-9.299118089342315	19	22	11	3UTR	MIRT623379	0	0
hsa-miR-16-2-3p	NM_001244567	BID	CCAATATTACTGTGCTGCTTTA#AAAGCACGACAGTGGATGCTGGG#(((.(((((((((..((((((.#))))))..)))))).))).))).	1788	1811	1.0	-18.5	0	8.1599e-05	0.515	0.88291024	0.61160064975	-8.561886198931896	18	23	6	3UTR	MIRT647841	0	0
hsa-miR-16-2-3p	NM_001244570	BID	CCAATATTACTGTGCTGCTTTA#AAAGCACGACAGTGGATGCTGGG#(((.(((((((((..((((((.#))))))..)))))).))).))).	1596	1619	1.0	-18.5	0	8.1599e-05	0.515	1.0620332	0.8793409774999997	-8.561886198931896	18	23	6	3UTR	MIRT647841	0	0
hsa-miR-16-2-3p	NM_022731	NUCKS1	CCAATATTACTGTGCTGCTTTA#GCAGCATGGTACTAAGGA#((..((.(((((((((((....#))))))))))).)).)).	5529	5547	1.0	-17.7	0	0.001013887	0.647	3.205133272727273	3.923164978750001	-10.070822730338621	15	18	11	3UTR	MIRT038707	0	0
hsa-miR-16-2-3p	NM_005578	LPP	CCAATATTACTGTGCTGCTTTA#GGGGCAGCATGTTAGTTTTGGG#((((.((((.(((((((((((.#))))))))))).)))).)))).	4125	4147	1.0	-20.9	0	0.003584587	0.559	-0.04266938181818183	0.18761984750000005	-9.299118089342315	19	22	11	3UTR	MIRT623379	0	0
hsa-miR-16-2-3p	XM_005264468	RAB1A	CCAATATTACTGTGCTGCTTTA#TAGAGCAGCATCCAGTAT#.......(((((((((((((((#))))))))))..))))).	1454	1472	1.0	-18.5	0	0.0003949039	0.647	0.0	0.0	-17.110244939514768	15	18	10	3UTR	MIRT546852	0	1
hsa-miR-16-2-3p	NM_001099666	PTAR1	CCAATATTACTGTGCTGCTTTA#GGCAGTACGGTGT#.......((((((((((((...#)))))))))))).	4177	4190	1.0	-17.7	0	0.005671516	0.588	0.07301939166666664	-0.19651486375	-17.110244939514768	12	13	12	3UTR	MIRT107898	0	1
hsa-miR-16-5p	NM_000127	EXT1	TAGCAGCACGTAAATATTGGCG#GCTAACATGTGCTGCA#..(((((((((.....(((((.#))))).))))))))).	5682	5698	0.9538461538461539	-18.8	1	0.0003460034	0.485	5.720564377777778	6.028705862500001	-11.418273199709544	14	16	9	3UTR	MIRT558039	0	0
hsa-miR-16-5p	XM_024454126	FBXW7	TAGCAGCACGTAAATATTGGCG#GCCAAACTTATTTATGCTGCTAA#((((((((..(((((((((((.#)))))...)))))))))))))).	2489	2512	0.9615384615384616	-21.6	1	0.02470634	0.691	0.0	0.0	-6.236470572775607	19	23	14	3UTR	MIRT032006	1	1
hsa-miR-16-5p	XM_047415898	FBXW7	TAGCAGCACGTAAATATTGGCG#GCCAAACTTATTTATGCTGCTAA#((((((((..(((((((((((.#)))))...)))))))))))))).	3413	3436	0.9615384615384616	-21.6	1	0.02470634	0.691	0.0	0.0	-6.236470572775607	19	23	14	3UTR	MIRT032006	1	1
hsa-miR-16-5p	NM_199511	CCDC80	TAGCAGCACGTAAATATTGGCG#GCCAGTTTCCTCTGCAGCTGCTAA#(((((((..(((...((((((.#))))))......))).))))))).	3706	3730	0.9615384615384616	-19.3	1	0.00220084	0.515	0.0	0.0	-10.189019124065343	16	24	7	3UTR	MIRT564554	0	0
hsa-miR-16-5p	NM_199512	CCDC80	TAGCAGCACGTAAATATTGGCG#GCCAGTTTCCTCTGCAGCTGCTAA#(((((((..(((...((((((.#))))))......))).))))))).	3109	3133	0.9615384615384616	-19.3	1	0.00220084	0.515	0.03513441428571435	0.0022172562499999937	-10.189019124065343	16	24	7	3UTR	MIRT564554	0	0
hsa-miR-16-5p	NM_001278579	ACVR2A	TAGCAGCACGTAAATATTGGCG#TGCCAATATGACACAGCTTGTGAATGTTTAGTGTGCTGCTGT#((((((((((((((((((.(((#.))).)))))))).)))))))))).	2279	2321	0.9615384615384616	-25.2	1	0.0002823525	0.588	6.767084736842105	4.495733475	-3.937574446201665	21	25	10	3UTR	MIRT000536	1	1
hsa-miR-16-5p	NM_001278580	ACVR2A	TAGCAGCACGTAAATATTGGCG#TGCCAATATGACACAGCTTGTGAATGTTTAGTGTGCTGCTGT#((((((((((((((((((.(((#.))).)))))))).)))))))))).	2082	2124	0.9615384615384616	-25.2	1	0.0002823525	0.588	6.767084736842105	4.495733475	-3.937574446201665	21	25	10	3UTR	MIRT000536	1	1
hsa-miR-16-5p	NM_001013415	FBXW7	TAGCAGCACGTAAATATTGGCG#GCCAAACTTATTTATGCTGCTAA#((((((((..(((((((((((.#)))))...)))))))))))))).	2737	2760	0.9615384615384616	-21.6	1	0.02470634	0.691	0.0	0.0	-6.236470572775607	19	23	14	3UTR	MIRT032006	1	1
hsa-miR-16-5p	NM_001379313	SRPRB	TAGCAGCACGTAAATATTGGCG#GCCATCTTCATGTGCTGCTT#.((((((((((......((((.#)))).....)))))))))).	1617	1637	0.9743589743589743	-22.6	1	2.190208e-05	0.485	0.0	0.0	-10.254597317694373	14	20	10	3UTR	MIRT001408	0	1
hsa-miR-16-5p	NM_021203	SRPRB	TAGCAGCACGTAAATATTGGCG#GCCATCTTCATGTGCTGCTT#.((((((((((......((((.#)))).....)))))))))).	1878	1898	0.9743589743589743	-22.6	1	2.190208e-05	0.485	0.08825313	-0.1364025825	-10.254597317694373	14	20	10	3UTR	MIRT001408	0	1
hsa-miR-16-5p	NM_001142523	IRAK3	TAGCAGCACGTAAATATTGGCG#GTCGTTGTATGTGTTGCTT#.(((((((((((.....((((.#))))...))))))))))).	6827	6846	0.9743589743589743	-18.6	1	0.05182954	0.706	-0.1529280181818182	0.3839069575000001	-6.907794008098015	15	19	11	3UTR	MIRT051159	0	0
hsa-miR-16-5p	NM_007199	IRAK3	TAGCAGCACGTAAATATTGGCG#GTCGTTGTATGTGTTGCTT#.(((((((((((.....((((.#))))...))))))))))).	7010	7029	0.9743589743589743	-18.6	1	0.05182954	0.706	-0.1529280181818182	0.3839069575000001	-6.907794008098015	15	19	11	3UTR	MIRT051159	0	0
hsa-miR-16-5p	NM_001306215	ZNF827	TAGCAGCACGTAAATATTGGCG#GTCGATGAAGGAATGGTAGCCATCTACAGTGCTGCTGG#((((((((((((.....((((.#.))))..))).))))))))).	5125	5163	0.9807692307692307	-22.2	1	3.230138e-05	0.456	4.679120630769232	2.792643845	-7.052043616942562	16	21	9	3UTR	MIRT051198	0	0
hsa-miR-16-5p	NM_001330638	TBC1D14	TAGCAGCACGTAAATATTGGCG#TGCCTCTGTGTGTGGTTTAAGTAAACTGGAAATGAGACATTGACGTGCTGCTC#.((((((((((.(((.......#.))).)))))))))).	3854	3907	1.0	-18.3	1	0.0006738369	0.529	-1.21522701	-0.38944086775	-7.373177227257086	13	16	10	3UTR	MIRT726369	0	0
hsa-miR-16-5p	NM_001330654	EIF4B	TAGCAGCACGTAAATATTGGCG#TGCGTGCTGCA#..((((((((((..........#)))))))))).	3263	3274	1.0	-18.9	1	0.0001026344	0.529	0.7669096599999999	0.22775851250000004	-8.071469890113187	10	11	10	3UTR	MIRT031710	1	0
hsa-miR-16-5p	NM_001331030	PDXK	TAGCAGCACGTAAATATTGGCG#CGCGTTTGCCACGTGCTGCC#..(((((((((.......((((#.))))))))))))).	1745	1765	1.0	-19.5	1	7.47241e-06	0.397	-0.11415702222222215	-0.7350082887499999	-11.418273199709544	13	15	13	3UTR	MIRT051266	0	0
hsa-miR-16-5p	NM_001346343	MRRF	TAGCAGCACGTAAATATTGGCG#CTGAAAGCTAATAATTTTGTGCTGCTT#.(((((((((.((.(((((((.#.))))))).)).))))))))).	7403	7430	1.0	-23.3	1	0.04620201	0.647	-0.034498988888888894	-0.2488524937500001	-7.474939230287874	18	22	9	3UTR	MIRT031902	0	0
hsa-miR-16-5p	NM_001349269	TMCC1	TAGCAGCACGTAAATATTGGCG#TGTGGATATTTAAGTGTGCTGCTC#.(((((((((((((((((.(((#))).))))))))..))))))))).	3280	3304	1.0	-22.9	1	0.01356804	0.647	3.2705227	1.447984215	-3.793324837357118	20	24	9	3UTR	MIRT031658	1	1
hsa-miR-16-5p	NM_001349273	TMCC1	TAGCAGCACGTAAATATTGGCG#TGTGGATATTTAAGTGTGCTGCTC#.(((((((((((((((((.(((#))).))))))))..))))))))).	2609	2633	1.0	-22.9	1	0.01356804	0.647	0.37301065263157895	0.5506478349999999	-3.793324837357118	20	24	9	3UTR	MIRT031658	1	1
hsa-miR-16-5p	NM_001349274	TMCC1	TAGCAGCACGTAAATATTGGCG#TGTGGATATTTAAGTGTGCTGCTC#.(((((((((((((((((.(((#))).))))))))..))))))))).	2470	2494	1.0	-22.9	1	0.01356804	0.647	0.2878465368421052	0.24320695499999997	-3.793324837357118	20	24	9	3UTR	MIRT031658	1	1
hsa-miR-16-5p	NM_001351543	TLE4	TAGCAGCACGTAAATATTGGCG#TGCTGATGTACAGTGCCTTTGCTGCTAT#((((((((.(((.(((((((((#)))))))))....)))...)))))))).	3712	3740	1.0	-18.7	1	0.001579809	0.574	0.0	0.0	-6.283094717113671	20	28	9	3UTR	MIRT031643	1	1
hsa-miR-16-5p	NM_001352357	PPP6R3	TAGCAGCACGTAAATATTGGCG#TGAAAATGCTCGTGCTGCTAA#((((((((((........((((#.)))))))))))))).	3857	3878	1.0	-18.8	1	0.000193342	0.574	0.0	0.0	-13.223621401949268	14	16	14	3UTR	MIRT737990	1	1
hsa-miR-16-5p	NM_001352361	PPP6R3	TAGCAGCACGTAAATATTGGCG#TGAAAATGCTCGTGCTGCTAA#((((((((((........((((#.)))))))))))))).	3580	3601	1.0	-18.8	1	0.000193342	0.574	1.2766150299999999	0.7084751949999999	-13.223621401949268	14	16	14	3UTR	MIRT737990	1	1
hsa-miR-16-5p	NM_001357016	ACP2	TAGCAGCACGTAAATATTGGCG#TGCCTGTCACTCAGCATTCCCATGCCTGATGTTTACCAAGTGCTGTG#..((((((((((((((((((((#.)))).)))))))))...))))))).	1457	1504	1.0	-22.7	1	0.02771934	0.529	4.273078203749999	2.9277886611249997	-4.95700071937229	20	26	9	3UTR	MIRT001481	0	0
hsa-miR-16-5p	NM_001362979	GOLGA7	TAGCAGCACGTAAATATTGGCG#TACGTGCTGCTT#.(((((((((((..........#))))))))))).	1332	1344	1.0	-19.5	1	0.0009883008	0.662	0.0	0.0	-6.907794008098015	11	12	11	3UTR	MIRT051297	0	0
hsa-miR-16-5p	NM_001362980	GOLGA7	TAGCAGCACGTAAATATTGGCG#TACGTGCTGCTT#.(((((((((((..........#))))))))))).	1269	1281	1.0	-19.5	1	0.0009883008	0.662	0.4082654909090909	0.9677904437500001	-6.907794008098015	11	12	11	3UTR	MIRT051297	0	0
hsa-miR-16-5p	NM_001363734	ASXL1	TAGCAGCACGTAAATATTGGCG#GCCACTGAGTGCTGTGCTGCTC#.(((((((((((.....((((.#)))).....))).)))))))).	5778	5800	1.0	-22.8	1	6.830684e-05	0.5	0.0	0.0	-6.907794008098015	15	22	8	3UTR	MIRT728288	0	0
hsa-miR-16-5p	XM_047422638	SPTLC1	TAGCAGCACGTAAATATTGGCG#TGCCTTGTGATTGCTGCTGCTT#.(((((((.((((.(((.((((#))))..))).))))))))))).	2541	2563	1.0	-19.7	1	0.01563182	0.603	0.0	0.0	-5.706554413123287	18	22	11	3UTR	MIRT001411	1	1
hsa-miR-16-5p	XM_047426686	BACE1	TAGCAGCACGTAAATATTGGCG#CGCCAACACTTGTGTTGCTT#.(((((((((......((((((#))))))....))))))))).	3620	3640	1.0	-19.9	1	0.0003295462	0.529	0.0	0.0	-13.079371793104722	15	20	9	3UTR	MIRT732050	1	1
hsa-miR-16-5p	XM_047427221	PPP6R3	TAGCAGCACGTAAATATTGGCG#TGAAAATGCTCGTGCTGCTAA#((((((((((........((((#.)))))))))))))).	3708	3729	1.0	-18.8	1	0.000193342	0.574	0.0	0.0	-13.223621401949268	14	16	14	3UTR	MIRT737990	1	1
hsa-miR-16-5p	XM_047427224	PPP6R3	TAGCAGCACGTAAATATTGGCG#TGAAAATGCTCGTGCTGCTAA#((((((((((........((((#.)))))))))))))).	3675	3696	1.0	-18.8	1	0.000193342	0.574	0.0	0.0	-13.223621401949268	14	16	14	3UTR	MIRT737990	1	1
hsa-miR-16-5p	XM_047439940	ASXL1	TAGCAGCACGTAAATATTGGCG#GCCACTGAGTGCTGTGCTGCTC#.(((((((((((.....((((.#)))).....))).)))))))).	5928	5950	1.0	-22.8	1	6.830684e-05	0.5	0.0	0.0	-6.907794008098015	15	22	8	3UTR	MIRT728288	0	0
hsa-miR-16-5p	XM_047448786	TFRC	TAGCAGCACGTAAATATTGGCG#GCCAGTACGTGCTAACAGGCTC#.((((((((((....((((((.#))))))))))))).....))).	4034	4056	1.0	-19.2	1	0.00186711	0.603	0.0	0.0	-10.021548237390759	16	22	13	3UTR	MIRT051253	1	0
hsa-miR-16-5p	NM_152924	ABHD2	TAGCAGCACGTAAATATTGGCG#GCCTCCGTGCTGCTGG#((((((((((........(((.#)))..)))))))))).	8141	8157	1.0	-20.5	1	0.000290417	0.544	1.5845675	1.4972758487499997	-13.223621401949268	13	16	10	3UTR	MIRT051282	0	1
hsa-miR-16-5p	NM_153051	MTMR3	TAGCAGCACGTAAATATTGGCG#GCTGATTTGAAGGTGCTGTTGC#(((((((((.(....((((((.#))))))....).))))))))).	7650	7672	1.0	-19.5	1	0.002944571	0.559	0.15015733333333336	0.14778931599999995	-11.408304314563484	16	22	9	3UTR	MIRT300993	1	1
hsa-miR-16-5p	NM_153485	NUP155	TAGCAGCACGTAAATATTGGCG#CTACAGGCACGTGCTGCTAC#(((((((((((...........#.))))))))))).	7012	7032	1.0	-19.5	1	0.0008372596	0.544	3.654423363636363	4.39862952875	-10.39884692653892	11	13	11	3UTR	MIRT051254	0	0
hsa-miR-16-5p	NM_173473	ANAPC16	TAGCAGCACGTAAATATTGGCG#GCTAAGAGATGTGCTGTTT#.((((((((((.....(((((.#)))))...)))))))))).	1849	1868	1.0	-19.7	1	0.005383748	0.515	0.0	0.0	-10.254597317694373	15	19	10	3UTR	MIRT004381	0	0
hsa-miR-16-5p	NM_173515	CNKSR3	TAGCAGCACGTAAATATTGGCG#GCCAAGAGATTGTGTTGCC#..((((((((......(((((.#))))).....)))))))).	10075	10094	1.0	-19.6	1	0.0009458922	0.603	0.0	0.0	-14.243047675119893	13	19	8	3UTR	MIRT558658	1	0
hsa-miR-16-5p	NM_173664	ARL10	TAGCAGCACGTAAATATTGGCG#CCAGGTTCATGTGCTGCA#..(((((((((.(((..(((..#))).))).))))))))).	9114	9132	1.0	-19.1	1	0.0003155139	0.574	0.0	0.0	-8.536853109272258	15	18	9	3UTR	MIRT051179	1	0
hsa-miR-16-5p	NM_175623	RAB3IP	TAGCAGCACGTAAATATTGGCG#TGTGCTGCTGA#((((((((((............#)))))))))).	8445	8456	1.0	-16.1	1	0.004262117	0.544	0.0	0.0	-13.223621401949268	10	11	10	3UTR	MIRT274742	0	1
hsa-miR-16-5p	NM_175624	RAB3IP	TAGCAGCACGTAAATATTGGCG#TGTGCTGCTGA#((((((((((............#)))))))))).	8028	8039	1.0	-16.1	1	0.004262117	0.544	-0.23422491	-0.10220652499999996	-13.223621401949268	10	11	10	3UTR	MIRT274742	0	1
hsa-miR-16-5p	NM_175625	RAB3IP	TAGCAGCACGTAAATATTGGCG#TGTGCTGCTGA#((((((((((............#)))))))))).	8345	8356	1.0	-16.1	1	0.004262117	0.544	-0.17546966	-0.13592183125	-13.223621401949268	10	11	10	3UTR	MIRT274742	0	1
hsa-miR-16-5p	NM_178818	CMTM4	TAGCAGCACGTAAATATTGGCG#GCCCCAAAGCTTTGCTGCTAT#((((((((..........(((.#))).........)))))))).	3209	3230	1.0	-16.4	1	0.0003125861	0.456	0.0	0.0	-15.522517528523212	11	21	8	3UTR	MIRT568023	0	1
hsa-miR-16-5p	NM_178835	ZNF827	TAGCAGCACGTAAATATTGGCG#GTCGATGAAGGAATGGTAGCCATCTACAGTGCTGCTGG#((((((((((((.....((((.#.))))..))).))))))))).	5134	5172	1.0	-22.2	1	3.230138e-05	0.456	0.0	0.0	-7.052043616942562	16	21	9	3UTR	MIRT051198	0	0
hsa-miR-16-5p	NM_181521	CMTM4	TAGCAGCACGTAAATATTGGCG#GCCTTAGGCACCACCTGCTCCAAGTCAGTGTTGAGTCTGCGTGCTGG#...((((((((((((((((((.#.))))))))).....))))))))).	1249	1296	1.0	-22.9	0	1.004376e-05	0.412	0.0	0.0	-6.514540193678739	18	25	9	3UTR	MIRT568023	0	1
hsa-miR-16-5p	NM_181741	ORC4	TAGCAGCACGTAAATATTGGCG#ATGTGCTGCTGG#(((((((((((...........#))))))))))).	5352	5364	1.0	-17.6	1	0.01416446	0.618	0.0	0.0	-10.39884692653892	11	12	11	3UTR	MIRT498982	0	1
hsa-miR-16-5p	NM_181742	ORC4	TAGCAGCACGTAAATATTGGCG#ATGTGCTGCTGG#(((((((((((...........#))))))))))).	5351	5363	1.0	-17.6	1	0.01416446	0.618	4.934119999999999	5.152981400749999	-10.39884692653892	11	12	11	3UTR	MIRT498982	0	1
hsa-miR-16-5p	NM_194071	CREB3L2	TAGCAGCACGTAAATATTGGCG#CTAGGGTGTTGCGTGCTGTG#..(((((((((((...((((..#))))....))))))))))).	6599	6619	1.0	-18.9	1	0.006195724	0.676	0.0	0.0	-6.782339277446944	15	20	11	3UTR	MIRT051241	0	0
hsa-miR-16-5p	NM_198461	LONRF2	TAGCAGCACGTAAATATTGGCG#GCTTTGCGTGTTGCTGT#(((((((((((((.....(((.#)))))))))))))))).	3142	3159	1.0	-21.0	1	3.253997e-05	0.574	0.0	0.0	-5.762913004276319	16	17	16	3UTR	MIRT051147	0	0
hsa-miR-16-5p	NM_199076	CNNM2	TAGCAGCACGTAAATATTGGCG#GTGTGACGTGCTGCG#..(((((((((..((((.....#)))).))))))))).	11570	11585	1.0	-18.0	1	0.0003317848	0.412	0.0	0.0	-9.592934641634889	13	15	9	3UTR	MIRT031855	1	1
hsa-miR-16-5p	NM_199177	MRRF	TAGCAGCACGTAAATATTGGCG#CTGAAAGCTAATAATTTTGTGCTGCTT#.(((((((((.((.(((((((.#.))))))).)).))))))))).	7332	7359	1.0	-23.3	1	0.04620201	0.647	0.0	0.0	-7.474939230287874	18	22	9	3UTR	MIRT031902	0	0
hsa-miR-16-5p	NM_199203	PEDS1-UBE2V1	TAGCAGCACGTAAATATTGGCG#TGCCTTGGTTTTGGTGCTGCTGC#(((((((((..((((...((((#))))...))))..))))))))).	2402	2425	1.0	-22.9	1	3.553847e-05	0.471	0.0	0.0	-8.237904470243807	17	23	9	3UTR	MIRT032009	1	1
hsa-miR-16-5p	NM_199482	MOB4	TAGCAGCACGTAAATATTGGCG#GCCGGGCGTGGTGCTAC#(((((.(((((.....(((((.#)))))))))).))))).	3390	3407	1.0	-20.7	0	0.0002889882	0.515	0.0	0.0	-12.299805687731965	15	17	10	3UTR	MIRT204624	1	1
hsa-miR-16-5p	NM_201571	CACNB2	TAGCAGCACGTAAATATTGGCG#GCTAGTATTTATCTTACTTGCTGCTAT#((((((((.((((((((((((.#))))))))).....))).)))))))).	5424	5451	1.0	-23.3	1	0.002675875	0.676	1.762730294117647	0.33366529400000006	-4.993964104447428	20	27	9	3UTR	MIRT051063	0	0
hsa-miR-16-5p	NM_001369787	KRAS	TAGCAGCACGTAAATATTGGCG#ATTTACTGCTGCTGT#((((((((.((((((.......#)))))))))))))).	2631	2646	1.0	-17.1	1	0.005010939	0.588	0.0	0.0	-5.227013184751041	14	15	14	3UTR	MIRT053090	1	0
hsa-miR-16-5p	NM_001375599	GALNT7	TAGCAGCACGTAAATATTGGCG#TGTCACCTGTATGGGGAATACTTTTACTACTCAGAAATGAATTTATGTGCTGCC#..(((((((((((((.......#.))))))))))))).	2608	2662	1.0	-19.7	1	0.02696261	0.676	4.154055230769231	3.873684762499999	-5.1900497996759025	13	15	13	3UTR	MIRT001466	1	1
hsa-miR-16-5p	NM_001378452	ITPR1	TAGCAGCACGTAAATATTGGCG#GCCAGTATTTATGTTTTTTATAAAACTGTGCA#..(((..((((((((((((((.#))))))))))))))..............))).	8956	8988	1.0	-19.5	0	0.009172125	0.735	0.0	0.0	-8.401646015436656	17	32	14	3UTR	MIRT092191	0	1
hsa-miR-16-5p	NM_001379313	SRPRB	TAGCAGCACGTAAATATTGGCG#TGTGGAGATTTAGGTGCTGCTC#.((((((((.(((((.((.(((#))).)).))))).)))))))).	1566	1588	1.0	-22.4	1	0.01162571	0.456	0.0	0.0	-5.2688803859889095	18	22	8	3UTR	MIRT001408	0	1
hsa-miR-16-5p	NM_001400328	SEC61A1	TAGCAGCACGTAAATATTGGCG#TCATCATGGCGCGTGCTGCTGC#(((((((((((...........#.))))))))))).	1752	1774	1.0	-19.5	1	2.831121e-05	0.5	0.0	0.0	-10.39884692653892	11	13	11	3UTR	MIRT031834	0	1
hsa-miR-16-5p	NM_001400329	SEC61A1	TAGCAGCACGTAAATATTGGCG#TCATCATGGCGCGTGCTGCTGC#(((((((((((...........#.))))))))))).	1537	1559	1.0	-19.5	1	2.831121e-05	0.5	0.0	0.0	-10.39884692653892	11	13	11	3UTR	MIRT031834	0	1
hsa-miR-16-5p	NM_014388	UTP25	TAGCAGCACGTAAATATTGGCG#TGCCCTGTGGTTACTGGCGTAATTGTGCTGCTGT#(((((((((((((.(((.((((#))))..))).))))..........))))))))).	4149	4183	1.0	-19.8	1	0.001352061	0.588	0.13199685130434782	-0.09163973649999997	-4.794414363722071	20	34	9	3UTR	MIRT032008	0	1
hsa-miR-16-5p	NM_014488	RAB30	TAGCAGCACGTAAATATTGGCG#ATGTGCTGCTGA#(((((((((((...........#))))))))))).	2364	2376	1.0	-17.6	1	0.0002271758	0.647	0.5726950909090909	0.521605425	-10.39884692653892	11	12	11	3UTR	MIRT001424	1	1
hsa-miR-16-5p	NM_014671	UBE3C	TAGCAGCACGTAAATATTGGCG#CGCCATGGGGCCGCTGCTGCTT#.(((((((((.......(((((#)))))......)).))))))).	4017	4039	1.0	-19.6	1	7.065454e-05	0.441	1.1363534999999998	0.5293592762500002	-13.079371793104722	14	22	7	3UTR	MIRT170734	0	1
hsa-miR-16-5p	NM_014779	TSC22D2	TAGCAGCACGTAAATATTGGCG#ATTTAGGTGCTGCA#..(((((((.(((((.......#))))).))))))).	9222	9236	1.0	-18.5	1	0.0006346965	0.632	0.739842514285714	0.28640607375	-6.432556268004081	12	14	7	3UTR	MIRT465160	1	1
hsa-miR-16-5p	NM_014782	ARMCX2	TAGCAGCACGTAAATATTGGCG#CGTGCTGCTT#.(((((((((............#))))))))).	2604	2614	1.0	-16.3	1	0.07812677	0.676	0.3032894	0.7450171774999998	-13.079371793104722	9	10	9	3UTR	MIRT051213	1	1
hsa-miR-16-5p	NM_014827	ZC3H11A	TAGCAGCACGTAAATATTGGCG#GTCAATGTTTCGTGTTCCGCA#..((((((((.((((((((((.#))))))))))))))))..)).	4679	4700	1.0	-19.9	1	0.01954881	0.647	1.4730511999999998	1.5915126762500003	-7.7817751947826395	18	21	16	3UTR	MIRT031561	1	1
hsa-miR-16-5p	NM_015008	TMCC1	TAGCAGCACGTAAATATTGGCG#TGTGGATATTTAAGTGTGCTGCTC#.(((((((((((((((((.(((#))).))))))))..))))))))).	2876	2900	1.0	-22.9	1	0.01356804	0.647	6.813712105263158	3.7991840125000014	-3.793324837357118	20	24	9	3UTR	MIRT031658	1	1
hsa-miR-16-5p	NM_015020	PHLPP2	TAGCAGCACGTAAATATTGGCG#CAGAGTTTAGGTGCTGTTAG#(((((((((.(((((.(((...#))).))))).))))))))).	6461	6481	1.0	-20.5	1	0.01477388	0.529	2.704243266666667	3.5374859175000006	-5.413129994833456	17	20	9	3UTR	MIRT547133	1	0
hsa-miR-16-5p	NM_015074	KIF1B	TAGCAGCACGTAAATATTGGCG#CTGATGTCTGTGCTGCTGT#((((((((((...(((((((..#))))))).)))))))))).	5952	5971	1.0	-19.1	1	0.002934192	0.485	1.3368341	0.5879630775	-11.398282843874613	17	19	10	3UTR	MIRT031988	1	1
hsa-miR-16-5p	NM_015328	AHCYL2	TAGCAGCACGTAAATATTGGCG#TGCCAGTGTTGCTGCC#..((((((.....(((((((((#))))))))))))))).	4032	4048	1.0	-19.1	1	0.00103471	0.515	0.29615016666666666	0.55023398875	-14.71660524361918	15	16	15	3UTR	MIRT031640	1	1
hsa-miR-16-5p	NM_015338	ASXL1	TAGCAGCACGTAAATATTGGCG#GCCACTGAGTGCTGTGCTGCTC#.(((((((((((.....((((.#)))).....))).)))))))).	6163	6185	1.0	-22.8	1	6.830684e-05	0.5	1.1191507583333336	0.9143512412499999	-6.907794008098015	15	22	8	3UTR	MIRT728288	0	0
hsa-miR-16-5p	NM_016099	GOLGA7	TAGCAGCACGTAAATATTGGCG#TACGTGCTGCTT#.(((((((((((..........#))))))))))).	1197	1209	1.0	-19.5	1	0.0009883008	0.662	0.6609981818181818	0.9440560937500002	-6.907794008098015	11	12	11	3UTR	MIRT051297	0	0
hsa-miR-16-5p	NM_016277	RAB23	TAGCAGCACGTAAATATTGGCG#GCTAATCTTTTGCGTAGACATATCGCTGTG#..((((((((((((.((((((.#))))))..))))))).........))))).	3756	3786	1.0	-17.8	1	5.532944e-05	0.603	4.674323666666668	4.733146845	-5.692450279622925	18	30	7	3UTR	MIRT031846	0	1
hsa-miR-16-5p	NM_016370	RAB9B	TAGCAGCACGTAAATATTGGCG#GCCAAGTGTATTTTGCGTGATTTCTGCTAT#((((((((((((((..(((((.#)))))......))))))))....)))))).	1116	1146	1.0	-22.3	1	0.02489014	0.588	1.2975020555555554	1.43095261625	-4.906073086755913	19	30	8	3UTR	MIRT000803	1	1
hsa-miR-16-5p	NM_017423	GALNT7	TAGCAGCACGTAAATATTGGCG#TGTCACCTGTATGGGGAATACTTTTACTACTCAGAAATGAATTTATGTGCTGCC#..(((((((((((((.......#.))))))))))))).	2608	2662	1.0	-19.7	1	0.02696261	0.676	1.277444646153846	1.2438523662499996	-5.1900497996759025	13	15	13	3UTR	MIRT001466	1	1
hsa-miR-16-5p	NM_017548	CDV3	TAGCAGCACGTAAATATTGGCG#AGGTGCTGCTAT#(((((((((.(...........#).))))))))).	2127	2139	1.0	-16.3	1	0.001741596	0.544	2.2145267777777775	0.7953071449999999	-11.641353394867098	10	12	9	3UTR	MIRT031715	1	1
hsa-miR-16-5p	NM_017913	CDC37L1	TAGCAGCACGTAAATATTGGCG#AATGTTTTGTAAATTTTTTTTAATGTGCTGCTAG#(((((((((((...........#.))))))))))).	1344	1378	1.0	-18.2	1	0.06180974	0.735	2.0848981818181818	2.7094858074999997	-10.39884692653892	11	13	11	3UTR	MIRT032005	1	1
hsa-miR-16-5p	NM_018178	GOLPH3L	TAGCAGCACGTAAATATTGGCG#GCCAGTCCATGTGTTGTC#..(((((((((....((((((.#))))))..))))))))).	2847	2865	1.0	-18.8	1	0.001442469	0.632	0.8564238777777778	2.22285915625	-11.18522411940593	15	18	9	3UTR	MIRT000848	0	0
hsa-miR-16-5p	NM_018312	PPP6R3	TAGCAGCACGTAAATATTGGCG#TGAAAATGCTCGTGCTGCTAA#((((((((((........((((#.)))))))))))))).	3678	3699	1.0	-18.8	1	0.000193342	0.574	1.2766150299999999	0.7084751949999999	-13.223621401949268	14	16	14	3UTR	MIRT737990	1	1
hsa-miR-16-5p	NM_001195573	DICER1	TAGCAGCACGTAAATATTGGCG#CGCTTTTGTGCTGCTGA#((((((((((........((((#))))..)))))))))).	8134	8151	1.0	-18.2	1	0.0009725479	0.662	4.9711884	4.56266999875	-13.223621401949268	14	17	10	3UTR	MIRT051245	1	1
hsa-miR-16-5p	NM_001195683	TGFBR3	TAGCAGCACGTAAATATTGGCG#CGCTATAGCTTTTCACCATGTGGTGTTTACCAGCTGTTAC#(((((((..(((((((((((((#))))).................))))))))..))))))).	5703	5743	1.0	-18.0	1	0.004591332	0.632	1.589110433333333	3.3142152850000004	-7.307599033628058	20	40	8	3UTR	MIRT565399	1	1
hsa-miR-16-5p	NM_001199743	DCTN5	TAGCAGCACGTAAATATTGGCG#GCCAGTTGTTGCAGTTGCTC#.((((((..((((..((((((.#))))))..)))).)))))).	1119	1139	1.0	-19.8	1	0.002063768	0.559	-0.0030553000000000017	-0.08972802875	-8.755638902554553	16	20	6	3UTR	MIRT142238	1	0
hsa-miR-16-5p	NM_001204376	NPR3	TAGCAGCACGTAAATATTGGCG#GCCAAATGCTAATTGCTGCTT#.(((((((........(((((.#)))))........))))))).	1877	1898	1.0	-18.1	1	0.03215968	0.618	-0.031646857142857136	0.24803806625	-15.378267919678663	12	21	7	3UTR	MIRT001435	1	0
hsa-miR-16-5p	NM_001204827	XPNPEP3	TAGCAGCACGTAAATATTGGCG#GCCAATGGAATCTGTTGCTAA#((((((((.(....(((((((.#)))))))....))))))))).	934	955	1.0	-20.7	1	0.0002839758	0.559	0.01688476249999999	0.20621917499999992	-13.311512419640783	16	21	9	3UTR	MIRT031703	0	0
hsa-miR-16-5p	NM_001206654	NCOR2	TAGCAGCACGTAAATATTGGCG#CGCAAGGAAGGACTTACCCAGTATTACTGCTGCTGT#((((((((.((.((((((((..#.)))))))))))))))))).	8700	8736	1.0	-21.6	1	0.002561535	0.544	-0.36206532500000005	-0.05129417499999999	-8.340767414043784	18	20	18	3UTR	MIRT006651	1	0
hsa-miR-16-5p	NM_001207000	HNRNPDL	TAGCAGCACGTAAATATTGGCG#GCCTCTTTTTTGCTGCTGTTT#.(((((((.(((((....(((.#))).....)))))))))))).	3072	3093	1.0	-18.2	1	0.07544111	0.618	0.8447211571428573	1.7231186499999998	-5.818213136157129	15	21	12	3UTR	MIRT031982	0	0
hsa-miR-16-5p	NM_001207048	BACE1	TAGCAGCACGTAAATATTGGCG#CGCCAACACTTGTGTTGCTT#.(((((((((......((((((#))))))....))))))))).	3532	3552	1.0	-19.9	1	0.0003295462	0.529	0.5699603777777779	0.8677074852500002	-13.079371793104722	15	20	9	3UTR	MIRT732050	1	1
hsa-miR-16-5p	NM_001207049	BACE1	TAGCAGCACGTAAATATTGGCG#CGCCAACACTTGTGTTGCTT#.(((((((((......((((((#))))))....))))))))).	3457	3477	1.0	-19.9	1	0.0003295462	0.529	0.3293566666666667	0.4003350057499999	-13.079371793104722	15	20	9	3UTR	MIRT732050	1	1
hsa-miR-16-5p	NM_001241	CCNT2	TAGCAGCACGTAAATATTGGCG#TGCTGTTGCTGCCACTGCTTCAATATTTGTAAGTGCTGCTT#.((((((((.((((((((((((#.)))..)))))))))...)))))))).	2215	2256	1.0	-21.2	1	0.07761876	0.647	1.8519407785714288	3.6824755625	-5.035831305685297	20	27	9	3UTR	MIRT001801	1	1
hsa-miR-16-5p	NM_001242374	ANAPC13	TAGCAGCACGTAAATATTGGCG#AATTCCTTTTGTGCTGCTGG#((((((((((............#.)))))))))).	1530	1550	1.0	-16.1	1	0.0003417414	0.574	-0.3688337	0.317471495	-13.223621401949268	10	12	10	3UTR	MIRT031495	0	0
hsa-miR-16-5p	NM_001242546	ANAPC16	TAGCAGCACGTAAATATTGGCG#GCTAAGAGATGTGCTGTTT#.((((((((((.....(((((.#)))))...)))))))))).	2175	2194	1.0	-19.7	1	0.005383748	0.515	0.66277097	0.001956173750000005	-10.254597317694373	15	19	10	3UTR	MIRT004381	0	0
hsa-miR-16-5p	NM_001242548	ANAPC16	TAGCAGCACGTAAATATTGGCG#GCTAAGAGATGTGCTGTTT#.((((((((((.....(((((.#)))))...)))))))))).	1708	1727	1.0	-19.7	1	0.005383748	0.515	0.66277097	0.001956173750000005	-10.254597317694373	15	19	10	3UTR	MIRT004381	0	0
hsa-miR-16-5p	NM_001243658	GLRX	TAGCAGCACGTAAATATTGGCG#AATAAAGACACGTGCTGCTGT#(((((((((((...........#.))))))))))).	1327	1348	1.0	-19.3	1	0.01075112	0.561	-0.29236612727272726	-0.2202902549999999	-10.39884692653892	11	13	11	3UTR	MIRT031719	0	1
hsa-miR-16-5p	NM_001243659	GLRX	TAGCAGCACGTAAATATTGGCG#AATAAAGACACGTGCTGCTGT#(((((((((((...........#.))))))))))).	920	941	1.0	-19.3	1	0.01075112	0.561	0.0	0.0	-10.39884692653892	11	13	11	3UTR	MIRT031719	0	1
hsa-miR-16-5p	NM_001243952	KIF2A	TAGCAGCACGTAAATATTGGCG#CCTTTGCGTGCATGCA#..((((((((((((........#.))))))))).))).	2979	2995	1.0	-16.9	1	0.005031111	0.574	3.437088307692308	2.019370635125	-5.925499359926538	12	15	9	3UTR	MIRT031888	0	0
hsa-miR-16-5p	NM_001243953	KIF2A	TAGCAGCACGTAAATATTGGCG#CCTTTGCGTGCATGCA#..((((((((((((........#.))))))))).))).	2719	2735	1.0	-16.9	1	0.005031111	0.574	1.151457893076923	2.1564704226249996	-5.925499359926538	12	15	9	3UTR	MIRT031888	0	0
hsa-miR-16-5p	NM_001244846	CHEK1	TAGCAGCACGTAAATATTGGCG#GTGAATATAGTGCTGCTAT#(((((((((....(((((.((.#)).))))).))))))))).	2253	2272	1.0	-19.5	1	0.001560372	0.588	2.814505111111111	1.407889381875	-12.640789312202793	16	19	9	3UTR	MIRT265077	1	1
hsa-miR-16-5p	NM_001257198	CUL3	TAGCAGCACGTAAATATTGGCG#CGGGAAAATGTGAATGTGCTGCG#..(((((((((..(((((..((#))....)))))..))))))))).	2735	2758	1.0	-18.6	1	0.04122007	0.618	1.9856258888888887	1.2356058629999997	-9.592934641634889	16	23	9	3UTR	MIRT659258	0	0
hsa-miR-16-5p	NM_001257396	UBE2V1	TAGCAGCACGTAAATATTGGCG#TGCCTTGGTTTTGGTGCTGCTGC#(((((((((..((((...((((#))))...))))..))))))))).	1543	1566	1.0	-22.9	1	3.553847e-05	0.471	2.8714325555555558	2.9073152574999996	-8.237904470243807	17	23	9	3UTR	MIRT001400	1	1
hsa-miR-16-5p	NM_001267722	SRP72	TAGCAGCACGTAAATATTGGCG#TGTGATTATATTACTCTGTCCTTGTTAATAAAGTGCTGCTGT#(((((((((.....((((((((#.))))))))..))))))))).	3030	3072	1.0	-19.2	1	0.01598312	0.662	0.9739523333333333	0.701182975	-13.4976292297232	17	21	9	3UTR	MIRT031562	1	1
hsa-miR-16-5p	NM_001270467	SOCS2	TAGCAGCACGTAAATATTGGCG#TGCCTGTTTTTCAAAGTGTTTATTTACTGCTGTTAC#((((((((.(((((((...((.#.))...))))))))))))))).	2033	2069	1.0	-18.1	1	0.03101889	0.75	2.849618	1.9385536624999997	-4.993964104447428	17	22	15	3UTR	MIRT051211	0	0
hsa-miR-16-5p	NM_001270468	SOCS2	TAGCAGCACGTAAATATTGGCG#TGCCTGTTTTTCAAAGTGTTTATTTACTGCTGTTAC#((((((((.(((((((...((.#.))...))))))))))))))).	1961	1997	1.0	-18.1	1	0.03101889	0.75	2.849618	1.9385536624999997	-4.993964104447428	17	22	15	3UTR	MIRT051211	0	0
hsa-miR-16-5p	NM_001270469	SOCS2	TAGCAGCACGTAAATATTGGCG#TGCCTGTTTTTCAAAGTGTTTATTTACTGCTGTTAC#((((((((.(((((((...((.#.))...))))))))))))))).	1811	1847	1.0	-18.1	1	0.03101889	0.75	2.849618	1.9385536624999997	-4.993964104447428	17	22	15	3UTR	MIRT051211	0	0
hsa-miR-16-5p	NM_001270470	SOCS2	TAGCAGCACGTAAATATTGGCG#TGCCTGTTTTTCAAAGTGTTTATTTACTGCTGTTAC#((((((((.(((((((...((.#.))...))))))))))))))).	2262	2298	1.0	-18.1	1	0.03101889	0.75	2.849618	1.9385536624999997	-4.993964104447428	17	22	15	3UTR	MIRT051211	0	0
hsa-miR-16-5p	NM_001270471	SOCS2	TAGCAGCACGTAAATATTGGCG#TGCCTGTTTTTCAAAGTGTTTATTTACTGCTGTTAC#((((((((.(((((((...((.#.))...))))))))))))))).	1766	1802	1.0	-18.1	1	0.03101889	0.75	2.849618	1.9385536624999997	-4.993964104447428	17	22	15	3UTR	MIRT051211	0	0
hsa-miR-16-5p	NM_001270679	MCU	TAGCAGCACGTAAATATTGGCG#GCCAGGATTGCTGCTGCTGC#((((((((.((((...(((((.#)))))..)))))))))))).	2473	2493	1.0	-23.0	1	1.532326e-05	0.456	0.0	0.0	-6.819302662522082	17	20	12	3UTR	MIRT005270	0	1
hsa-miR-16-5p	NM_001270680	MCU	TAGCAGCACGTAAATATTGGCG#GCCAGGATTGCTGCTGCTGC#((((((((.((((...(((((.#)))))..)))))))))))).	2581	2601	1.0	-23.0	1	1.532326e-05	0.456	0.7248630000000001	1.074285320775	-6.819302662522082	17	20	12	3UTR	MIRT005270	0	1
hsa-miR-16-5p	NM_001271282	DICER1	TAGCAGCACGTAAATATTGGCG#CGCTTTTGTGCTGCTGA#((((((((((........((((#))))..)))))))))).	8476	8493	1.0	-18.2	1	0.0009725479	0.662	6.307936870000001	5.70860147125	-13.223621401949268	14	17	10	3UTR	MIRT051245	1	1
hsa-miR-16-5p	NM_001278312	NUP155	TAGCAGCACGTAAATATTGGCG#CTACAGGCACGTGCTGCTAC#(((((((((((...........#.))))))))))).	6820	6840	1.0	-19.5	1	0.0008372596	0.544	0.0	0.0	-10.39884692653892	11	13	11	3UTR	MIRT051254	0	0
hsa-miR-16-5p	NM_001278402	RAB3IP	TAGCAGCACGTAAATATTGGCG#TGTGCTGCTGA#((((((((((............#)))))))))).	7566	7577	1.0	-16.1	1	0.004262117	0.544	0.15437425999999999	0.12239944624999997	-13.223621401949268	10	11	10	3UTR	MIRT274742	0	1
hsa-miR-16-5p	NM_001278542	DIXDC1	TAGCAGCACGTAAATATTGGCG#TGCCAGTGTTTATGATAGCCAGTTCCATTGTGCTGTC#..((((((((((((((((((((#)))))))))))))................))))))).	1077	1114	1.0	-23.2	1	0.00117862	0.515	0.18431127777777787	-0.0015510449999999731	-4.95700071937229	20	37	13	3UTR	MIRT051092	1	1
hsa-miR-16-5p	NM_001280798	GLS2	TAGCAGCACGTAAATATTGGCG#GCCAGGACATGCTGCTGCTAC#((((((((.(((....(((((.#)))))....))))))))))).	1947	1968	1.0	-22.6	1	0.0009989576	0.544	0.0	0.0	-8.108433275188325	16	21	11	3UTR	MIRT734798	1	1
hsa-miR-16-5p	NM_001282576	UBE2V1	TAGCAGCACGTAAATATTGGCG#TGCCTTGGTTTTGGTGCTGCTGC#(((((((((..((((...((((#))))...))))..))))))))).	1943	1966	1.0	-22.9	1	3.553847e-05	0.471	0.0	0.0	-8.237904470243807	17	23	9	3UTR	MIRT001400	1	1
hsa-miR-16-5p	NM_001282763	CDV3	TAGCAGCACGTAAATATTGGCG#AGGTGCTGCTAT#(((((((((.(...........#).))))))))).	1646	1658	1.0	-16.3	1	0.001741596	0.544	2.2145267777777775	0.7953071449999999	-11.641353394867098	10	12	9	3UTR	MIRT031715	1	1
hsa-miR-16-5p	NM_001282764	CDV3	TAGCAGCACGTAAATATTGGCG#AGGTGCTGCTAT#(((((((((.(...........#).))))))))).	1394	1406	1.0	-16.3	1	0.001741596	0.544	2.2145267777777775	0.7953071449999999	-11.641353394867098	10	12	9	3UTR	MIRT031715	1	1
hsa-miR-16-5p	NM_001282765	CDV3	TAGCAGCACGTAAATATTGGCG#AGGTGCTGCTAT#(((((((((.(...........#).))))))))).	2579	2591	1.0	-16.3	1	0.001741596	0.544	2.2145267777777775	0.7953071449999999	-11.641353394867098	10	12	9	3UTR	MIRT031715	1	1
hsa-miR-16-5p	NM_001286059	RAB30	TAGCAGCACGTAAATATTGGCG#ATGTGCTGCTGA#(((((((((((...........#))))))))))).	2159	2171	1.0	-17.6	1	0.0002271758	0.647	2.332067	1.1756930687500002	-10.39884692653892	11	12	11	3UTR	MIRT001424	1	1
hsa-miR-16-5p	NM_001286060	RAB30	TAGCAGCACGTAAATATTGGCG#ATGTGCTGCTGA#(((((((((((...........#))))))))))).	2263	2275	1.0	-17.6	1	0.0002271758	0.647	0.6071240909090908	0.71614323875	-10.39884692653892	11	12	11	3UTR	MIRT001424	1	1
hsa-miR-16-5p	NM_001286061	RAB30	TAGCAGCACGTAAATATTGGCG#ATGTGCTGCTGA#(((((((((((...........#))))))))))).	2187	2199	1.0	-17.6	1	0.0002271758	0.647	1.0680801818181818	1.48908957875	-10.39884692653892	11	12	11	3UTR	MIRT001424	1	1
hsa-miR-16-5p	NM_001286220	GOT2	TAGCAGCACGTAAATATTGGCG#TTTGCGTGCTGCTAG#((((((((((((((........#)))))))))))))).	2173	2188	1.0	-22.7	1	0.0003725737	0.485	0.0	0.0	-4.906073086755913	14	15	14	3UTR	MIRT051208	0	0
hsa-miR-16-5p	NM_001286700	RCL1	TAGCAGCACGTAAATATTGGCG#CGTGCTGCTAG#((((((((((............#)))))))))).	1367	1378	1.0	-17.9	1	0.002790673	0.456	0.0	0.0	-13.223621401949268	10	11	10	3UTR	MIRT031762	0	0
hsa-miR-16-5p	NM_001286701	RCL1	TAGCAGCACGTAAATATTGGCG#CGTGCTGCTAG#((((((((((............#)))))))))).	933	944	1.0	-17.9	1	0.002790673	0.456	-0.35327728999999997	-0.14644366625000005	-13.223621401949268	10	11	10	3UTR	MIRT031762	0	0
hsa-miR-16-5p	NM_001286805	TBC1D14	TAGCAGCACGTAAATATTGGCG#TGCCTCTGTGTGTGGTTTAAGTAAACTGGAAATGAGACATTGACGTGCTGCTC#.((((((((((.(((.......#.))).)))))))))).	3617	3670	1.0	-18.3	1	0.0006738369	0.529	-1.21522701	-0.38944086775	-7.373177227257086	13	16	10	3UTR	MIRT726369	0	0
hsa-miR-16-5p	NM_001287044	VEGFA	TAGCAGCACGTAAATATTGGCG#CGCCATTTTATTTTTCTTGCTGCTAA#((((((((.(.(((((.(((((#)))))...)))))..).)))))))).	902	928	1.0	-21.0	1	0.1771184	0.603	0.0	0.0	-7.8187385798577775	19	26	8	3UTR	MIRT003890	1	1
hsa-miR-16-5p	NM_001288765	DMPK	TAGCAGCACGTAAATATTGGCG#GCCGGGAATGCTGCTGCTGC#((((((((.(((....(((((.#)))))...))))))))))).	1944	1964	1.0	-21.1	1	0.0009726878	0.353	0.0	0.0	-8.108433275188325	16	20	11	3UTR	MIRT509366	0	1
hsa-miR-16-5p	NM_001289003	PHLPP2	TAGCAGCACGTAAATATTGGCG#CAGAGTTTAGGTGCTGTTAG#(((((((((.(((((.(((...#))).))))).))))))))).	6607	6627	1.0	-20.5	1	0.01477388	0.529	2.780694555555556	3.38143952375	-5.413129994833456	17	20	9	3UTR	MIRT547133	1	0
hsa-miR-16-5p	NM_018360	TXLNG	TAGCAGCACGTAAATATTGGCG#GCAAATCACTAGACAAATAAGCTTAGTGTTTACGTGACTGA#...((((((((((((((((((.#.))).)))))))))))).))).	2240	2281	1.0	-21.5	0	5.919084e-05	0.603	-0.024181109999999985	0.2576015177500001	-6.514540193678739	18	22	12	3UTR	MIRT051225	1	0
hsa-miR-16-5p	NM_018361	AGPAT5	TAGCAGCACGTAAATATTGGCG#CGTCAGTGGTGCTGCTC#.((((((((.....((((((((#)))))))))))))))).	2155	2172	1.0	-20.3	1	0.0007743373	0.397	2.5966074624999997	4.330117241249999	-13.353379620878652	16	17	16	3UTR	MIRT031850	0	0
hsa-miR-16-5p	NM_019116	UBFD1	TAGCAGCACGTAAATATTGGCG#CGTGCTGCTGC#((((((((((............#)))))))))).	1596	1607	1.0	-17.3	1	0.003889696	0.338	0.01928116000000004	0.20415735875000002	-13.223621401949268	10	11	10	3UTR	MIRT032064	1	1
hsa-miR-16-5p	NM_020384	CLDN2	TAGCAGCACGTAAATATTGGCG#AGGTGCTGCTGA#(((((((((.(...........#).))))))))).	1123	1135	1.0	-16.2	1	0.0004765366	0.485	0.9100457333333334	0.64650776	-11.641353394867098	10	12	9	3UTR	MIRT735443	1	1
hsa-miR-16-5p	NM_020474	GALNT1	TAGCAGCACGTAAATATTGGCG#TGCTGAACGTGCTGTC#..(((((((((.....((((((#))))))))))))))).	2264	2280	1.0	-17.5	1	0.002313521	0.647	1.558286777777778	1.9849088690000005	-11.418273199709544	15	16	15	3UTR	MIRT080012	1	0
hsa-miR-16-5p	NM_020773	TBC1D14	TAGCAGCACGTAAATATTGGCG#TGCCTCTGTGTGTGGTTTAAGTAAACTGGAAATGAGACATTGACGTGCTGCTC#.((((((((((.(((.......#.))).)))))))))).	4546	4599	1.0	-18.3	1	0.0006738369	0.529	-1.21522701	-0.38944086775	-7.373177227257086	13	16	10	3UTR	MIRT726369	0	0
hsa-miR-16-5p	NM_020791	TAOK1	TAGCAGCACGTAAATATTGGCG#GCCAATGACTTTACCAGCTGCTGA#(((((((..((((((((((((.#)))))))..)))))..))))))).	4981	5005	1.0	-23.9	1	0.03296002	0.544	2.519071285714286	2.8999628875	-7.307599033628058	19	24	7	3UTR	MIRT196451	1	1
hsa-miR-16-5p	NM_020791	TAOK1	TAGCAGCACGTAAATATTGGCG#CCATTCCAAATGTGCTGCTGT#(((((((((((......(((..#)))......))))))))))).	10538	10559	1.0	-19.5	1	0.02500449	0.603	0.5480987	0.68456057375	-10.39884692653892	14	21	11	3UTR	MIRT196451	1	1
hsa-miR-16-5p	NM_020861	ZBTB2	TAGCAGCACGTAAATATTGGCG#GCGTGCTGCTT#.((((((((((...........#)))))))))).	2088	2099	1.0	-18.4	1	0.005041181	0.574	1.4437602999999997	3.0781612212500002	-10.254597317694373	10	11	10	3UTR	MIRT051258	0	1
hsa-miR-16-5p	NM_021090	MTMR3	TAGCAGCACGTAAATATTGGCG#GCTGATTTGAAGGTGCTGTTGC#(((((((((.(....((((((.#))))))....).))))))))).	7761	7783	1.0	-19.5	1	0.002944571	0.559	0.15015733333333336	0.14778931599999995	-11.408304314563484	16	22	9	3UTR	MIRT300993	1	1
hsa-miR-16-5p	NM_021145	DMTF1	TAGCAGCACGTAAATATTGGCG#GCCACACACATTGTTGCTGCTAT#((((((((((.......((((.#)))).......))).))))))).	3070	3093	1.0	-19.1	1	0.01339955	0.588	0.20821621818181812	0.4577333574999999	-13.223621401949268	14	23	7	3UTR	MIRT031727	1	1
hsa-miR-16-5p	NM_021154	PSAT1	TAGCAGCACGTAAATATTGGCG#CGCGTATTTTGCCTTTGCTGCTAC#((((((((.(((((.....(((#)))....)))))...)))))))).	1309	1333	1.0	-18.4	1	0.01040407	0.632	0.6367558624999999	0.21340178375000002	-5.962462745001676	16	24	8	3UTR	MIRT001427	1	1
hsa-miR-16-5p	NM_022456	RAB3IP	TAGCAGCACGTAAATATTGGCG#TGTGCTGCTGA#((((((((((............#)))))))))).	8128	8139	1.0	-16.1	1	0.004262117	0.544	0.15437425999999999	0.12239944624999997	-13.223621401949268	10	11	10	3UTR	MIRT274742	0	1
hsa-miR-16-5p	NM_022470	ZMAT3	TAGCAGCACGTAAATATTGGCG#GCCAGTAGGTTATTCATTTTGCTGCTAA#((((((((.((((.(((((((.#)))))))..))))......)))))))).	3588	3616	1.0	-21.0	1	0.00277772	0.765	0.06690713749999999	-0.16111343199999997	-5.850804021967834	19	28	8	3UTR	MIRT500423	1	1
hsa-miR-16-5p	NM_022755	IPPK	TAGCAGCACGTAAATATTGGCG#TGCCTTGAGACGTGTTGCG#..(((((((((.......((((#)))).....))))))))).	2518	2537	1.0	-19.2	1	0.0001030179	0.412	0.7424411333333334	1.0486253749999999	-11.418273199709544	13	19	9	3UTR	MIRT031925	1	1
hsa-miR-16-5p	NM_025142	TAOK1	TAGCAGCACGTAAATATTGGCG#GCCAATGACTTTACCAGCTGCTGA#(((((((..((((((((((((.#)))))))..)))))..))))))).	3975	3999	1.0	-23.9	1	0.03296002	0.544	2.519071285714286	2.8999628875	-7.307599033628058	19	24	7	3UTR	MIRT196451	1	1
hsa-miR-16-5p	NM_025142	TAOK1	TAGCAGCACGTAAATATTGGCG#CCATTCCAAATGTGCTGCTGT#(((((((((((......(((..#)))......))))))))))).	9532	9553	1.0	-19.5	1	0.02500449	0.603	0.5480987	0.68456057375	-10.39884692653892	14	21	11	3UTR	MIRT196451	1	1
hsa-miR-16-5p	NM_030621	DICER1	TAGCAGCACGTAAATATTGGCG#CGCTTTTGTGCTGCTGA#((((((((((........((((#))))..)))))))))).	8544	8561	1.0	-18.2	1	0.0009725479	0.662	5.5876508000000005	5.802723481249998	-13.223621401949268	14	17	10	3UTR	MIRT051245	1	1
hsa-miR-16-5p	NM_030806	C1orf21	TAGCAGCACGTAAATATTGGCG#TGAAAAGGATAATCCAATGTACGTGCTGGTGC#((.((((((((..(((((((..#.))))))))))))))).)).	3416	3448	1.0	-21.3	0	8.760866e-05	0.559	0.29797125	0.26429698625	-10.131047842770712	17	20	15	3UTR	MIRT031863	1	1
hsa-miR-16-5p	NM_031372	HNRNPDL	TAGCAGCACGTAAATATTGGCG#GCCTCTTTTTTGCTGCTGTTT#.(((((((.(((((....(((.#))).....)))))))))))).	3480	3501	1.0	-18.2	1	0.07544111	0.618	2.0109667142857144	3.5758227537500002	-5.818213136157129	15	21	12	3UTR	MIRT031982	0	0
hsa-miR-16-5p	NM_001142546	LUZP1	TAGCAGCACGTAAATATTGGCG#ACGTGCTGCTGC#(((((((((((...........#))))))))))).	6938	6950	1.0	-19.1	1	0.008743101	0.529	1.6864803727272728	2.1322328399999995	-10.39884692653892	11	12	11	3UTR	MIRT001445	1	1
hsa-miR-16-5p	NM_001164160	PPP6R3	TAGCAGCACGTAAATATTGGCG#TGAAAATGCTCGTGCTGCTAA#((((((((((........((((#.)))))))))))))).	3831	3852	1.0	-18.8	1	0.000193342	0.574	1.2766150299999999	0.7084751949999999	-13.223621401949268	14	16	14	3UTR	MIRT737990	1	1
hsa-miR-16-5p	NM_001164161	PPP6R3	TAGCAGCACGTAAATATTGGCG#TGAAAATGCTCGTGCTGCTAA#((((((((((........((((#.)))))))))))))).	3813	3834	1.0	-18.8	1	0.000193342	0.574	1.2766150299999999	0.7084751949999999	-13.223621401949268	14	16	14	3UTR	MIRT737990	1	1
hsa-miR-16-5p	NM_001164162	PPP6R3	TAGCAGCACGTAAATATTGGCG#TGAAAATGCTCGTGCTGCTAA#((((((((((........((((#.)))))))))))))).	3795	3816	1.0	-18.8	1	0.000193342	0.574	1.2766150299999999	0.7084751949999999	-13.223621401949268	14	16	14	3UTR	MIRT737990	1	1
hsa-miR-16-5p	NM_001164163	PPP6R3	TAGCAGCACGTAAATATTGGCG#TGAAAATGCTCGTGCTGCTAA#((((((((((........((((#.)))))))))))))).	3726	3747	1.0	-18.8	1	0.000193342	0.574	1.2766150299999999	0.7084751949999999	-13.223621401949268	14	16	14	3UTR	MIRT737990	1	1
hsa-miR-16-5p	NM_001164755	ASPH	TAGCAGCACGTAAATATTGGCG#GCCCGATGCCTGCTGCTAT#((((((((.(((......(((.#)))...))).)))))))).	2010	2029	1.0	-18.3	1	0.007455102	0.529	1.3542084500000002	0.6501686375	-8.108433275188325	14	19	8	3UTR	MIRT031802	0	0
hsa-miR-16-5p	NM_001166135	RBM28	TAGCAGCACGTAAATATTGGCG#TGGCATTGTATATTTTATTTATAAATTATGTGCTGCA#..(((((((((((.........#.))))))))))).	8568	8605	1.0	-18.0	1	0.002815205	0.809	0.3663536927272727	-0.07978740925	-6.782339277446944	11	13	11	3UTR	MIRT031952	0	0
hsa-miR-16-5p	NM_001168	BIRC5	TAGCAGCACGTAAATATTGGCG#GGGTGCTGCTGG#(((((((((.(...........#).))))))))).	687	699	1.0	-16.2	1	1.591633e-08	0.412	-0.003424622222222198	-0.40311220812500004	-11.641353394867098	10	12	9	3UTR	MIRT054909	0	0
hsa-miR-16-5p	NM_001171092	CLDN2	TAGCAGCACGTAAATATTGGCG#AGGTGCTGCTGA#(((((((((.(...........#).))))))))).	1314	1326	1.0	-16.2	1	0.0004765366	0.485	0.0	0.0	-11.641353394867098	10	12	9	3UTR	MIRT735443	1	1
hsa-miR-16-5p	NM_001171095	CLDN2	TAGCAGCACGTAAATATTGGCG#AGGTGCTGCTGA#(((((((((.(...........#).))))))))).	1083	1095	1.0	-16.2	1	0.0004765366	0.485	0.9100457333333334	0.64650776	-11.641353394867098	10	12	9	3UTR	MIRT735443	1	1
hsa-miR-16-5p	NM_001173512	MRRF	TAGCAGCACGTAAATATTGGCG#CTGAAAGCTAATAATTTTGTGCTGCTT#.(((((((((.((.(((((((.#.))))))).)).))))))))).	7336	7363	1.0	-23.3	1	0.04620201	0.647	0.0	0.0	-7.474939230287874	18	22	9	3UTR	MIRT031902	0	0
hsa-miR-16-5p	NM_001174124	GOLGA7	TAGCAGCACGTAAATATTGGCG#TACGTGCTGCTT#.(((((((((((..........#))))))))))).	1202	1214	1.0	-19.5	1	0.0009883008	0.662	0.6609981818181818	0.9440560937500002	-6.907794008098015	11	12	11	3UTR	MIRT051297	0	0
hsa-miR-16-5p	NM_001174125	SLC11A2	TAGCAGCACGTAAATATTGGCG#TGTGCTGCTAC#((((((((((............#)))))))))).	3959	3970	1.0	-16.1	1	0.01791685	0.662	1.0449382200000001	1.040851285	-13.223621401949268	10	11	10	3UTR	MIRT031729	0	1
hsa-miR-16-5p	NM_001174126	SLC11A2	TAGCAGCACGTAAATATTGGCG#CCAGTGATCAGTTTTCCGTGCTGCA#..((((((((.(((((((((..#))))))......))).)))))))).	2588	2613	1.0	-19.1	1	0.003276238	0.574	3.0619223333333334	3.1844241674999996	-7.7817751947826395	17	25	8	3UTR	MIRT031729	0	1
hsa-miR-16-5p	NM_001174129	SLC11A2	TAGCAGCACGTAAATATTGGCG#GCCAAAAGTATGTGCCGTTGC#((((.(((((((....(((((.#)))))...))))))).)))).	2163	2184	1.0	-19.4	0	5.526247e-05	0.559	0.34857304285714286	0.28730736874999996	-11.171080791755035	16	21	7	3UTR	MIRT031729	0	1
hsa-miR-16-5p	NM_001174130	SLC11A2	TAGCAGCACGTAAATATTGGCG#GCCAAAAGTATGTGCCGTTGC#((((.(((((((....(((((.#)))))...))))))).)))).	1823	1844	1.0	-19.4	0	5.526247e-05	0.559	0.5031847142857143	0.07761509875000001	-11.171080791755035	16	21	7	3UTR	MIRT031729	0	1
hsa-miR-16-5p	NM_001174130	SLC11A2	TAGCAGCACGTAAATATTGGCG#TGTGCTGCTAC#((((((((((............#)))))))))).	3920	3931	1.0	-16.1	1	0.01791685	0.662	1.22571918	1.3128831949999995	-13.223621401949268	10	11	10	3UTR	MIRT031729	0	1
hsa-miR-16-5p	NM_001184906	FBXL20	TAGCAGCACGTAAATATTGGCG#GCCATTTTATGTTTATTGTGCTGA#...((((((((((((((((((.#))))....)))))))).)))))).	6131	6155	1.0	-20.6	0	0.01026205	0.515	0.3264849834782609	0.08141117749999996	-6.514540193678739	18	24	8	3UTR	MIRT548276	1	1
hsa-miR-16-5p	NM_001190879	ORC4	TAGCAGCACGTAAATATTGGCG#ATGTGCTGCTGG#(((((((((((...........#))))))))))).	5506	5518	1.0	-17.6	1	0.01416446	0.618	3.0718317727272724	3.090001825	-10.39884692653892	11	12	11	3UTR	MIRT498982	0	1
hsa-miR-16-5p	NM_001190881	ORC4	TAGCAGCACGTAAATATTGGCG#ATGTGCTGCTGG#(((((((((((...........#))))))))))).	5110	5122	1.0	-17.6	1	0.01416446	0.618	1.6916139909090908	2.5161797525	-10.39884692653892	11	12	11	3UTR	MIRT498982	0	1
hsa-miR-16-5p	NM_001190882	ORC4	TAGCAGCACGTAAATATTGGCG#ATGTGCTGCTGG#(((((((((((...........#))))))))))).	5278	5290	1.0	-17.6	1	0.01416446	0.618	4.234015945454545	4.015780738249999	-10.39884692653892	11	12	11	3UTR	MIRT498982	0	1
hsa-miR-16-5p	NM_004852	ONECUT2	TAGCAGCACGTAAATATTGGCG#CCAATGTTTTGTCTGCA#..((((.(((.(((((((((..#)))))))))))))))).	16315	16332	1.0	-16.7	0	0.009428465	0.603	1.078833222222222	1.8296429950000002	-9.32546172965396	16	17	16	3UTR	MIRT031575	1	1
hsa-miR-16-5p	NM_004907	IER2	TAGCAGCACGTAAATATTGGCG#GCGTGCTGCTGG#(((((((((((...........#))))))))))).	1701	1713	1.0	-19.7	1	0.0008274109	0.382	-0.49957369999999984	0.27203508750000005	-10.39884692653892	11	12	11	3UTR	MIRT150355	0	0
hsa-miR-16-5p	NM_004941	DHX8	TAGCAGCACGTAAATATTGGCG#TGCCAGTATCTGTGCTGCA#..((((((((...(((((((((#))))))))).)))))))).	4732	4751	1.0	-24.5	1	2.219784e-05	0.5	-0.04142155555555556	-0.25246754225000007	-12.417709117045238	17	19	9	3UTR	MIRT031619	0	0
hsa-miR-16-5p	NM_004965	HMGN1	TAGCAGCACGTAAATATTGGCG#TGCTGTGAAAGATTACAGATTTGAACATGTAGTGTACGTGCTGTTGA#((((((((((((..........#.)))))))))))).	991	1038	1.0	-18.4	1	0.001325674	0.574	2.6737425	2.5707852025	-7.052043616942562	12	14	12	3UTR	MIRT051195	0	0
hsa-miR-16-5p	NM_004985	KRAS	TAGCAGCACGTAAATATTGGCG#ATTTACTGCTGCTGT#((((((((.((((((.......#)))))))))))))).	2644	2659	1.0	-17.1	1	0.005010939	0.588	1.2565561250000001	0.1704937075	-5.227013184751041	14	15	14	3UTR	MIRT053090	1	0
hsa-miR-16-5p	NM_005772	RCL1	TAGCAGCACGTAAATATTGGCG#CGTGCTGCTAG#((((((((((............#)))))))))).	1543	1554	1.0	-17.9	1	0.002790673	0.456	-0.31021878999999997	-0.11568772875000008	-13.223621401949268	10	11	10	3UTR	MIRT031762	0	0
hsa-miR-16-5p	NM_005801	EIF1	TAGCAGCACGTAAATATTGGCG#GTCAACTGTTTTTGCAAGCATTTAGCCAGAGTCATGCTGTGCTGTTAA#((((((((((((.((.(((((.#.))))).))..))).))))))))).	1766	1814	1.0	-21.2	1	0.0007565692	0.544	0.2809179076923077	0.08927867375000001	-5.459754139171521	19	25	9	3UTR	MIRT031390	0	0
hsa-miR-16-5p	NM_006055	LANCL1	TAGCAGCACGTAAATATTGGCG#TGCTGAAGTGCTGCTGG#(((((((((.............#.))))))))).	3008	3025	1.0	-16.0	1	2.861014e-05	0.5	0.4915062222222222	0.5228344567500001	-14.466127870277449	9	11	9	3UTR	MIRT562029	0	0
hsa-miR-16-5p	NM_006136	CAPZA2	TAGCAGCACGTAAATATTGGCG#GTTGATGGATTTAGCCATATATGCTGCTAA#((((((((.(((.....((((.#.))))))).)))))))).	1300	1330	1.0	-18.7	1	0.01124555	0.632	2.9822511250000003	1.6351160875000001	-8.108433275188325	15	18	8	3UTR	MIRT031933	1	1
hsa-miR-16-5p	NM_006312	NCOR2	TAGCAGCACGTAAATATTGGCG#CGCAAGGAAGGACTTACCCAGTATTACTGCTGCTGT#((((((((.((.((((((((..#.)))))))))))))))))).	8730	8766	1.0	-21.6	1	0.002561535	0.544	-0.36206532500000005	-0.05129417499999999	-8.340767414043784	18	20	18	3UTR	MIRT006651	1	0
hsa-miR-16-5p	NM_006577	B3GNT2	TAGCAGCACGTAAATATTGGCG#TGCCATATTTTCACATGCTGCTT#.(((((((.(((((((.(((((#))))))))))..)).))))))).	2340	2363	1.0	-19.5	1	0.09078102	0.706	1.0901915222222223	1.1331518437499999	-4.849714495602881	19	23	10	3UTR	MIRT089106	0	1
hsa-miR-16-5p	NM_006602	TCFL5	TAGCAGCACGTAAATATTGGCG#TGTCATGACTCTGAGTCACGTGCTGCTGT#(((((((((((...........#.))))))))))).	2128	2157	1.0	-19.3	1	0.0008887095	0.5	0.7694992181818182	1.0502380849999997	-10.39884692653892	11	13	11	3UTR	MIRT051271	0	0
hsa-miR-16-5p	NM_006947	SRP72	TAGCAGCACGTAAATATTGGCG#TGTGATTATATTACTCTGTCCTTGTTAATAAAGTGCTGCTGT#(((((((((.....((((((((#.))))))))..))))))))).	3213	3255	1.0	-19.2	1	0.01598312	0.662	0.9739523333333333	0.701182975	-13.4976292297232	17	21	9	3UTR	MIRT031562	1	1
hsa-miR-16-5p	NM_007011	ABHD2	TAGCAGCACGTAAATATTGGCG#GCCTCCGTGCTGCTGG#((((((((((........(((.#)))..)))))))))).	8539	8555	1.0	-20.5	1	0.000290417	0.544	1.5845675	1.4972758487499997	-13.223621401949268	13	16	10	3UTR	MIRT051282	0	1
hsa-miR-16-5p	NM_007298	BRCA1	TAGCAGCACGTAAATATTGGCG#TGTAAATGTTGTGCTGTTAA#(((((((((...((((((.(((#))).))))))))))))))).	3629	3649	1.0	-15.6	1	0.0008239263	0.676	0.32848188888888885	1.7867472953749999	-11.35165869953655	18	20	15	3UTR	MIRT003328	0	0
hsa-miR-16-5p	NM_012204	GTF3C4	TAGCAGCACGTAAATATTGGCG#GCTGATGTTTTGTTCTCAGAAAATAGCTGCTGG#((((((((((.((((((((((.#)))))))))))))............))))))).	3102	3135	1.0	-19.3	1	0.001787573	0.588	0.002075640000000023	-0.03501595875	-6.7623489216120145	20	33	13	3UTR	MIRT031966	0	0
hsa-miR-16-5p	NM_013277	RACGAP1	TAGCAGCACGTAAATATTGGCG#ATGTGCTGCTGG#(((((((((((...........#))))))))))).	2854	2866	1.0	-17.6	1	0.008765795	0.574	3.5365994999999995	3.822034306250001	-10.39884692653892	11	12	11	3UTR	MIRT031559	0	0
hsa-miR-16-5p	NM_013336	SEC61A1	TAGCAGCACGTAAATATTGGCG#TCATCATGGCGCGTGCTGCTGC#(((((((((((...........#.))))))))))).	1605	1627	1.0	-19.5	1	2.831121e-05	0.5	-0.14402782727272728	0.4576605800000001	-10.39884692653892	11	13	11	3UTR	MIRT031834	0	1
hsa-miR-16-5p	NM_013346	SNX12	TAGCAGCACGTAAATATTGGCG#GCCCATCATTATGGCTGCTT#.((((((.(((((..((.(((.#))).))..))))))))))).	1134	1154	1.0	-19.3	1	3.856277e-05	0.485	0.6223809	0.8056405712499999	-7.69924924430879	16	20	11	3UTR	MIRT031489	0	0
hsa-miR-16-5p	NM_013436	NCKAP1	TAGCAGCACGTAAATATTGGCG#GCCAATGGATAGGTGAATGCA#..(((.(((.((..(((((((.#)))))))..)).)))..))).	16466	16487	1.0	-19.2	0	0.0002510715	0.632	1.7970649714285716	2.8023220349999995	-10.246436479080167	15	21	7	3UTR	MIRT566652	1	0
hsa-miR-16-5p	NM_014000	VCL	TAGCAGCACGTAAATATTGGCG#TGCCTAAGGGAGAGTGGTATTTGCAGACTAGAATTCTAGTGCTGCTGA#((((((((((((((((((((((#))))...........)))))))))..............))))))))).	4662	4710	1.0	-21.0	1	0.00405684	0.588	0.33418515744680855	0.33378026325	-3.937574446201665	22	48	9	3UTR	MIRT051181	0	1
hsa-miR-16-5p	NM_001417	EIF4B	TAGCAGCACGTAAATATTGGCG#TGCGTGCTGCA#..((((((((((..........#)))))))))).	3380	3391	1.0	-18.9	1	0.0001026344	0.529	0.0	0.0	-8.071469890113187	10	11	10	3UTR	MIRT031710	1	0
hsa-miR-16-5p	NM_001625	AK2	TAGCAGCACGTAAATATTGGCG#TGCTAATTTTATGTGCATGA#...(((((((((((.(((((((#)))))))))))))))).)).	2786	2806	1.0	-17.7	0	0.02730662	0.618	0.0	0.0	-7.249989753929374	18	20	16	3UTR	MIRT032010	0	0
hsa-miR-16-5p	NM_001991	EZH1	TAGCAGCACGTAAATATTGGCG#GCCAGTGTTGCTT#.((((((((........((((.#)))))))))))).	3319	3332	1.0	-16.2	1	0.0008211666	0.441	0.0	0.0	-14.3218782614329	12	13	12	3UTR	MIRT146015	1	1
hsa-miR-16-5p	NM_002027	FNTA	TAGCAGCACGTAAATATTGGCG#TTGGGTGCTGCTGC#(((((((((.(((.........#))).))))))))).	1308	1322	1.0	-17.9	1	0.0001985159	0.574	1.4586777111111116	3.8802679700000002	-7.0054194726044985	12	14	9	3UTR	MIRT031435	1	1
hsa-miR-16-5p	NM_002064	GLRX	TAGCAGCACGTAAATATTGGCG#AATAAAGACACGTGCTGCTGT#(((((((((((...........#.))))))))))).	1477	1498	1.0	-19.3	1	0.01075112	0.561	0.0	0.0	-10.39884692653892	11	13	11	3UTR	MIRT031719	0	1
hsa-miR-16-5p	NM_002080	GOT2	TAGCAGCACGTAAATATTGGCG#TTTGCGTGCTGCTAG#((((((((((((((........#)))))))))))))).	2302	2317	1.0	-22.7	1	0.0003725737	0.485	0.0	0.0	-4.906073086755913	14	15	14	3UTR	MIRT051208	0	0
hsa-miR-16-5p	NM_002222	ITPR1	TAGCAGCACGTAAATATTGGCG#GCCAGTATTTATGTTTTTTATAAAACTGTGCA#..(((..((((((((((((((.#))))))))))))))..............))).	8767	8799	1.0	-19.5	0	0.009172125	0.735	0.0	0.0	-8.401646015436656	17	32	14	3UTR	MIRT092191	0	1
hsa-miR-16-5p	NM_003194	TBP	TAGCAGCACGTAAATATTGGCG#CGTGCTGCTAT#((((((((((............#)))))))))).	1489	1500	1.0	-17.7	1	0.0001288014	0.471	0.0	0.0	-13.223621401949268	10	11	10	3UTR	MIRT051286	1	1
hsa-miR-16-5p	NM_003234	TFRC	TAGCAGCACGTAAATATTGGCG#GCCAGTACGTGCTAACAGGCTC#.((((((((((....((((((.#))))))))))))).....))).	4917	4939	1.0	-19.2	1	0.00186711	0.603	0.0	0.0	-10.021548237390759	16	22	13	3UTR	MIRT051253	1	0
hsa-miR-16-5p	NM_003314	TTC1	TAGCAGCACGTAAATATTGGCG#TTGTGTGCTGCTT#.((((((((((((.........#)))))))))))).	998	1011	1.0	-15.6	1	0.02701008	0.515	0.0	0.0	-5.618663395431772	12	13	12	3UTR	MIRT031698	0	1
hsa-miR-16-5p	NM_003373	VCL	TAGCAGCACGTAAATATTGGCG#TGCCTAAGGGAGAGTGGTATTTGCAGACTAGAATTCTAGTGCTGCTGA#((((((((((((((((((((((#))))...........)))))))))..............))))))))).	4458	4506	1.0	-21.0	1	0.00405684	0.588	0.0	0.0	-3.937574446201665	22	48	9	3UTR	MIRT051181	0	1
hsa-miR-16-5p	NM_003376	VEGFA	TAGCAGCACGTAAATATTGGCG#CGCCATTTTATTTTTCTTGCTGCTAA#((((((((.(.(((((.(((((#)))))...)))))..).)))))))).	1942	1968	1.0	-21.0	1	0.1771184	0.603	0.0	0.0	-7.8187385798577775	19	26	8	3UTR	MIRT003890	1	1
hsa-miR-16-5p	NM_003461	ZYX	TAGCAGCACGTAAATATTGGCG#CGTCTTCCAGACACCCCACCTGAGGGGGGCACCAGGTTTAGTGCTGCTGC#(((((((((.(((((..(((.(#.).))).)))))))))))))).	2022	2072	1.0	-20.5	1	0.0005555953	0.309	3.740073333333333	4.818957083074999	-5.413129994833456	18	22	14	3UTR	MIRT006534	1	0
hsa-miR-16-5p	NM_003681	PDXK	TAGCAGCACGTAAATATTGGCG#CGCGTTTGCCACGTGCTGCC#..(((((((((.......((((#.))))))))))))).	1966	1986	1.0	-19.5	1	7.47241e-06	0.397	-0.015209444444444454	-0.017556051249999968	-11.418273199709544	13	15	13	3UTR	MIRT051266	0	0
hsa-miR-16-5p	NM_003979	GPRC5A	TAGCAGCACGTAAATATTGGCG#CTAGTATTTATGTGTTGA#...(((((((((((((((((..#))))))))))))))))).	5386	5404	1.0	-20.5	0	0.008410664	0.618	0.0	0.0	-6.514540193678739	17	18	17	3UTR	MIRT621500	0	0
hsa-miR-16-5p	NM_004298	NUP155	TAGCAGCACGTAAATATTGGCG#CTACAGGCACGTGCTGCTAC#(((((((((((...........#.))))))))))).	7167	7187	1.0	-19.5	1	0.0008372596	0.544	0.0	0.0	-10.39884692653892	11	13	11	3UTR	MIRT051254	0	0
hsa-miR-16-5p	NM_004311	ARL3	TAGCAGCACGTAAATATTGGCG#TGCATTCCCTCCATGGTTTTGAAACCACAGACAGTGTTTGCTGGTGCTGTC#..(((((((((((((((((...#.))))))))))..))))))).	1086	1137	1.0	-21.1	1	0.0003706939	0.529	0.0	0.0	-4.95700071937229	17	21	10	3UTR	MIRT031723	1	1
hsa-miR-16-5p	XM_005247590	CDV3	TAGCAGCACGTAAATATTGGCG#AGGTGCTGCTAT#(((((((((.(...........#).))))))))).	2124	2136	1.0	-16.3	1	0.001741596	0.544	0.0	0.0	-11.641353394867098	10	12	9	3UTR	MIRT031715	1	1
hsa-miR-16-5p	XM_006723727	ASXL1	TAGCAGCACGTAAATATTGGCG#GCCACTGAGTGCTGTGCTGCTC#.(((((((((((.....((((.#)))).....))).)))))))).	6160	6182	1.0	-22.8	1	6.830684e-05	0.5	0.0	0.0	-6.907794008098015	15	22	8	3UTR	MIRT728288	0	0
hsa-miR-16-5p	XM_006724226	TXN2	TAGCAGCACGTAAATATTGGCG#GTGCTGCTGC#(((((((((.............#))))))))).	1182	1192	1.0	-16.0	1	2.25789e-06	0.338	0.0	0.0	-14.466127870277449	9	10	9	3UTR	MIRT001402	1	1
hsa-miR-16-5p	XM_011512175	GPR55	TAGCAGCACGTAAATATTGGCG#GCCACTACGGCTGCTC#.((((((.((((.....((((.#)))).)))))))))).	4028	4044	1.0	-19.1	1	3.955107e-06	0.324	0.0	0.0	-9.221428937278647	14	16	10	3UTR	MIRT051125	0	0
hsa-miR-16-5p	XM_011522882	CMTM4	TAGCAGCACGTAAATATTGGCG#GCCTTAGGCACCACCTGCTCCAAGTCAGTGTTGAGTCTGCGTGCTGG#...((((((((((((((((((.#.))))))))).....))))))))).	1162	1209	1.0	-22.9	0	1.004376e-05	0.412	0.0	0.0	-6.514540193678739	18	25	9	3UTR	MIRT568023	0	1
hsa-miR-16-5p	XM_011531634	ZNF827	TAGCAGCACGTAAATATTGGCG#GTCGATGAAGGAATGGTAGCCATCTACAGTGCTGCTGG#((((((((((((.....((((.#.))))..))).))))))))).	5092	5130	1.0	-22.2	1	3.230138e-05	0.456	0.0	0.0	-7.052043616942562	16	21	9	3UTR	MIRT051198	0	0
hsa-miR-16-5p	XM_011531716	TMEM154	TAGCAGCACGTAAATATTGGCG#GCCAATATTATGAAAGATGCAAGCAAGGTGCTGAGCTGG#(((((((((...(((((((((.#)))))))))..................)))))..)))).	2330	2369	1.0	-19.0	1	9.723409e-05	0.515	0.0	0.0	-11.35165869953655	18	39	9	3UTR	MIRT051094	1	1
hsa-miR-16-5p	XM_011537057	SAV1	TAGCAGCACGTAAATATTGGCG#GCCAGTGCTGTTAC#(((((((((........((((.#))))))))))))).	2617	2631	1.0	-17.5	1	0.0002493146	0.544	0.0	0.0	-14.466127870277449	13	14	13	3UTR	MIRT031649	0	1
hsa-miR-16-5p	XM_011538238	RACGAP1	TAGCAGCACGTAAATATTGGCG#ATGTGCTGCTGG#(((((((((((...........#))))))))))).	2593	2605	1.0	-17.6	1	0.008765795	0.574	0.0	0.0	-10.39884692653892	11	12	11	3UTR	MIRT031559	0	0
hsa-miR-16-5p	NM_001045	SLC6A4	TAGCAGCACGTAAATATTGGCG#ATGTGCTGCTGT#(((((((((((...........#))))))))))).	2698	2710	1.0	-17.4	1	0.005037972	0.559	-0.3993177272727273	0.3864181325000001	-10.39884692653892	11	12	11	3UTR	MIRT053620	1	1
hsa-miR-16-5p	NM_001077261	NCOR2	TAGCAGCACGTAAATATTGGCG#CGCAAGGAAGGACTTACCCAGTATTACTGCTGCTGT#((((((((.((.((((((((..#.)))))))))))))))))).	8562	8598	1.0	-21.6	1	0.002561535	0.544	-0.36206532500000005	-0.05129417499999999	-8.340767414043784	18	20	18	3UTR	MIRT006651	1	0
hsa-miR-16-5p	NM_001081563	DMPK	TAGCAGCACGTAAATATTGGCG#GCCGGGAATGCTGCTGCTGC#((((((((.(((....(((((.#)))))...))))))))))).	2677	2697	1.0	-21.1	1	0.0009726878	0.353	0.1202073625	-0.21856194625000003	-8.108433275188325	16	20	11	3UTR	MIRT509366	0	1
hsa-miR-16-5p	NM_001098511	KIF2A	TAGCAGCACGTAAATATTGGCG#CCTTTGCGTGCATGCA#..((((((((((((........#.))))))))).))).	2890	2906	1.0	-16.9	1	0.005031111	0.574	3.437088307692308	2.019370635125	-5.925499359926538	12	15	9	3UTR	MIRT031888	0	0
hsa-miR-16-5p	NM_001113361	TBC1D14	TAGCAGCACGTAAATATTGGCG#TGCCTCTGTGTGTGGTTTAAGTAAACTGGAAATGAGACATTGACGTGCTGCTC#.((((((((((.(((.......#.))).)))))))))).	4460	4513	1.0	-18.3	1	0.0006738369	0.529	-1.3569603000000001	-0.6325507102499999	-7.373177227257086	13	16	10	3UTR	MIRT726369	0	0
hsa-miR-16-5p	NM_001113363	TBC1D14	TAGCAGCACGTAAATATTGGCG#TGCCTCTGTGTGTGGTTTAAGTAAACTGGAAATGAGACATTGACGTGCTGCTC#.((((((((((.(((.......#.))).)))))))))).	3701	3754	1.0	-18.3	1	0.0006738369	0.529	-1.21522701	-0.38944086775	-7.373177227257086	13	16	10	3UTR	MIRT726369	0	0
hsa-miR-16-5p	NM_001118890	GLRX	TAGCAGCACGTAAATATTGGCG#AATAAAGACACGTGCTGCTGT#(((((((((((...........#.))))))))))).	909	930	1.0	-19.3	1	0.01075112	0.561	-0.29236612727272726	-0.2202902549999999	-10.39884692653892	11	13	11	3UTR	MIRT031719	0	1
hsa-miR-16-5p	NM_001126103	RACGAP1	TAGCAGCACGTAAATATTGGCG#ATGTGCTGCTGG#(((((((((((...........#))))))))))).	2865	2877	1.0	-17.6	1	0.008765795	0.574	2.4602117636363636	3.94180120625	-10.39884692653892	11	12	11	3UTR	MIRT031559	0	0
hsa-miR-16-5p	NM_001126104	RACGAP1	TAGCAGCACGTAAATATTGGCG#ATGTGCTGCTGG#(((((((((((...........#))))))))))).	2745	2757	1.0	-17.6	1	0.008765795	0.574	3.8770886363636365	5.31839497375	-10.39884692653892	11	12	11	3UTR	MIRT031559	0	0
hsa-miR-16-5p	NM_001128148	TFRC	TAGCAGCACGTAAATATTGGCG#GCCAGTACGTGCTAACAGGCTC#.((((((((((....((((((.#))))))))))))).....))).	4705	4727	1.0	-19.2	1	0.00186711	0.603	2.217113933333333	1.5313862287499997	-10.021548237390759	16	22	13	3UTR	MIRT051253	1	0
hsa-miR-16-5p	NM_001128224	TMCC1	TAGCAGCACGTAAATATTGGCG#TGTGGATATTTAAGTGTGCTGCTC#.(((((((((((((((((.(((#))).))))))))..))))))))).	2866	2890	1.0	-22.9	1	0.01356804	0.647	6.320409473684211	3.8451289212500006	-3.793324837357118	20	24	9	3UTR	MIRT031658	1	1
hsa-miR-16-5p	NM_001130723	AHCYL2	TAGCAGCACGTAAATATTGGCG#TGCCAGTGTTGCTGCC#..((((((.....(((((((((#))))))))))))))).	3791	3807	1.0	-19.1	1	0.00103471	0.515	0.29615016666666666	0.55023398875	-14.71660524361918	15	16	15	3UTR	MIRT031640	1	1
hsa-miR-16-5p	NM_001134405	RUNDC3B	TAGCAGCACGTAAATATTGGCG#CGCCAATATTTCCATGTGTATTCTGTTGC#((((((((((((((((((((((#)))))))))))..)))))....)))))).	3984	4013	1.0	-21.3	1	0.002496268	0.632	1.1792592107142856	1.298631883	-3.937574446201665	22	29	11	3UTR	MIRT051186	0	1
hsa-miR-16-5p	NM_001134406	RUNDC3B	TAGCAGCACGTAAATATTGGCG#CGCCAATATTTCCATGTGTATTCTGTTGC#((((((((((((((((((((((#)))))))))))..)))))....)))))).	3837	3866	1.0	-21.3	1	0.002496268	0.632	1.1792592107142856	1.298631883	-3.937574446201665	22	29	11	3UTR	MIRT051186	0	1
hsa-miR-16-5p	NM_001134422	CDV3	TAGCAGCACGTAAATATTGGCG#AGGTGCTGCTAT#(((((((((.(...........#).))))))))).	2864	2876	1.0	-16.3	1	0.001741596	0.544	2.2145267777777775	0.7953071449999999	-11.641353394867098	10	12	9	3UTR	MIRT031715	1	1
hsa-miR-16-5p	NM_001134423	CDV3	TAGCAGCACGTAAATATTGGCG#AGGTGCTGCTAT#(((((((((.(...........#).))))))))).	2421	2433	1.0	-16.3	1	0.001741596	0.544	2.2145267777777775	0.7953071449999999	-11.641353394867098	10	12	9	3UTR	MIRT031715	1	1
hsa-miR-16-5p	NM_001136574	LANCL1	TAGCAGCACGTAAATATTGGCG#TGCTGAAGTGCTGCTGG#(((((((((.............#.))))))))).	2981	2998	1.0	-16.0	1	2.861014e-05	0.5	1.1096423333333334	0.33444321575	-14.466127870277449	9	11	9	3UTR	MIRT562029	0	0
hsa-miR-16-5p	NM_001136575	LANCL1	TAGCAGCACGTAAATATTGGCG#TGCTGAAGTGCTGCTGG#(((((((((.............#.))))))))).	2906	2923	1.0	-16.0	1	2.861014e-05	0.5	0.3566397333333334	0.4001907267500001	-14.466127870277449	9	11	9	3UTR	MIRT562029	0	0
hsa-miR-16-5p	NM_001142282	RPS24	TAGCAGCACGTAAATATTGGCG#GCCGAAGGAGTAAAGGTGCTGCA#..(((((((.(.....(((((.#)))))........).))))))).	453	476	1.0	-19.2	1	0.001202458	0.515	5.929330285714285	5.52266238875	-12.660779668037723	13	23	7	3UTR	MIRT051083	0	0
hsa-miR-16-5p	NM_001142283	RPS24	TAGCAGCACGTAAATATTGGCG#GCCGAAGGAGTAAAGGTGCTGCA#..(((((((.(.....(((((.#)))))........).))))))).	471	494	1.0	-19.2	1	0.001422341	0.515	7.268701428571428	5.405380014999999	-12.660779668037723	13	23	7	3UTR	MIRT051083	0	0
hsa-miR-16-5p	NM_001142284	RPS24	TAGCAGCACGTAAATATTGGCG#GCCGAAGGAGTAAAGGTGCTGCA#..(((((((.(.....(((((.#)))))........).))))))).	468	491	1.0	-19.2	1	0.001551391	0.515	7.9383857142857135	5.383481515	-12.660779668037723	13	23	7	3UTR	MIRT051083	0	0
hsa-miR-16-5p	NM_001142326	DMTF1	TAGCAGCACGTAAATATTGGCG#GCCACACACATTGTTGCTGCTAT#((((((((((.......((((.#)))).......))).))))))).	2523	2546	1.0	-19.1	1	0.01339955	0.588	0.6392507454545455	1.07595254	-13.223621401949268	14	23	7	3UTR	MIRT031727	1	1
hsa-miR-16-5p	NM_001142327	DMTF1	TAGCAGCACGTAAATATTGGCG#GCCACACACATTGTTGCTGCTAT#((((((((((.......((((.#)))).......))).))))))).	2640	2663	1.0	-19.1	1	0.01339955	0.588	1.731702636363636	0.8174245250000001	-13.223621401949268	14	23	7	3UTR	MIRT031727	1	1
hsa-miR-16-5p	NM_032012	TMEM245	TAGCAGCACGTAAATATTGGCG#GCTAATGTTTCTTGCTGG#...(((((.(.((((((((((.#))))))))))).))))).	5010	5028	1.0	-18.8	0	0.0001773435	0.691	0.447523887	1.02257560425	-10.395704327334853	16	18	11	3UTR	MIRT031582	0	1
hsa-miR-16-5p	NM_032116	KATNAL1	TAGCAGCACGTAAATATTGGCG#GTATTTATTAAATGTGTTTTTCCTTACCTTTTGTGCTGCTAC#((((((((((........((..#.))........)))))))))).	7499	7541	1.0	-17.3	1	0.124914	0.676	1.32329843	0.6711271475	-13.223621401949268	12	22	10	3UTR	MIRT031447	1	0
hsa-miR-16-5p	NM_032195	SON	TAGCAGCACGTAAATATTGGCG#ATGTGCTGCTAA#(((((((((((...........#))))))))))).	7363	7375	1.0	-17.9	1	0.001906712	0.618	2.8448645454545454	2.9138925124999995	-10.39884692653892	11	12	11	3UTR	MIRT031734	0	1
hsa-miR-16-5p	NM_032466	ASPH	TAGCAGCACGTAAATATTGGCG#GCCCGATGCCTGCTGCTAT#((((((((.(((......(((.#)))...))).)))))))).	2139	2158	1.0	-18.3	1	0.007455102	0.529	0.5856058749999999	0.6583674187500002	-8.108433275188325	14	19	8	3UTR	MIRT031802	0	0
hsa-miR-16-5p	NM_032486	DCTN5	TAGCAGCACGTAAATATTGGCG#GCCAGTTGTTGCAGTTGCTC#.((((((..((((..((((((.#))))))..)))).)))))).	1089	1109	1.0	-19.8	1	0.002063768	0.559	-0.0030553000000000017	-0.08972802875	-8.755638902554553	16	20	6	3UTR	MIRT142238	1	0
hsa-miR-16-5p	NM_033017	TRIM4	TAGCAGCACGTAAATATTGGCG#TGCTATTGTGAATAGTGCTGCA#..(((((((....(((.(((((#))))).))).....))))))).	3343	3365	1.0	-19.6	1	0.001364339	0.652	-0.5388196428571429	-0.6996690179605265	-13.660215585373416	15	22	7	3UTR	MIRT051223	0	0
hsa-miR-16-5p	NM_033091	TRIM4	TAGCAGCACGTAAATATTGGCG#TGCTATTGTGAATAGTGCTGCA#..(((((((....(((.(((((#))))).))).....))))))).	3265	3287	1.0	-19.6	1	0.001364339	0.652	-0.5388196428571429	-0.6996690179605265	-13.660215585373416	15	22	7	3UTR	MIRT051223	0	0
hsa-miR-16-5p	NM_033360	KRAS	TAGCAGCACGTAAATATTGGCG#ATTTACTGCTGCTGT#((((((((.((((((.......#)))))))))))))).	2768	2783	1.0	-17.1	1	0.005010939	0.588	0.1585431375	0.7508727575000002	-5.227013184751041	14	15	14	3UTR	MIRT053090	1	0
hsa-miR-16-5p	NM_058179	PSAT1	TAGCAGCACGTAAATATTGGCG#CGCGTATTTTGCCTTTGCTGCTAC#((((((((.(((((.....(((#)))....)))))...)))))))).	1447	1471	1.0	-18.4	1	0.01040407	0.632	0.6367558624999999	0.21340178375000002	-5.962462745001676	16	24	8	3UTR	MIRT001427	1	1
hsa-miR-16-5p	NM_058241	CCNT2	TAGCAGCACGTAAATATTGGCG#TGCTGTTGCTGCCACTGCTTCAATATTTGTAAGTGCTGCTT#.((((((((.((((((((((((#.)))..)))))))))...)))))))).	2316	2357	1.0	-21.2	1	0.07761876	0.647	1.8519407785714288	3.6824755625	-5.035831305685297	20	27	9	3UTR	MIRT001801	1	1
hsa-miR-16-5p	NM_133329	KCNG3	TAGCAGCACGTAAATATTGGCG#TGCTTCATATTTATGTGTTTCTTGCTGG#(((((((((((((((((.((((#))))..))))))))))))....))))).	1841	1869	1.0	-19.8	1	0.003261842	0.559	0.49943953333333324	0.51370724	-3.937574446201665	21	28	12	3UTR	MIRT031572	0	0
hsa-miR-16-5p	NM_138290	RUNDC3B	TAGCAGCACGTAAATATTGGCG#CGCCAATATTTCCATGTGTATTCTGTTGC#((((((((((((((((((((((#)))))))))))..)))))....)))))).	4035	4064	1.0	-21.3	1	0.002496268	0.632	1.1792592107142856	1.298631883	-3.937574446201665	22	29	11	3UTR	MIRT051186	0	1
hsa-miR-16-5p	NM_138357	MCU	TAGCAGCACGTAAATATTGGCG#GCCAGGATTGCTGCTGCTGC#((((((((.((((...(((((.#)))))..)))))))))))).	2536	2556	1.0	-23.0	1	1.532326e-05	0.456	1.2888107500000001	1.9042002488125007	-6.819302662522082	17	20	12	3UTR	MIRT005270	0	1
hsa-miR-16-5p	NM_138735	NRXN1	TAGCAGCACGTAAATATTGGCG#GCCATTTTTGGTAAATTCAATGTTATAAGTGTTGCTAA#(((((((((...((((((((..#.))))))))....))))))))).	3029	3067	1.0	-19.2	1	0.02005736	0.676	3.857815555555555	2.323639335	-11.35165869953655	17	23	9	3UTR	MIRT051233	0	0
hsa-miR-16-5p	NM_138777	MRRF	TAGCAGCACGTAAATATTGGCG#CTGAAAGCTAATAATTTTGTGCTGCTT#.(((((((((.((.(((((((.#.))))))).)).))))))))).	7492	7519	1.0	-23.3	1	0.04620201	0.647	-0.034498988888888894	-0.2488524937500001	-7.474939230287874	18	22	9	3UTR	MIRT031902	0	0
hsa-miR-16-5p	NM_139215	TAF15	TAGCAGCACGTAAATATTGGCG#TGCCAGAGTTTTGCCTGCTGCTT#.(((((((.(((((..((((((#))))))...))))).))))))).	1913	1936	1.0	-21.8	1	0.001268888	0.529	4.12014	2.5107948	-5.818213136157129	18	23	7	3UTR	MIRT031463	0	0
hsa-miR-16-5p	NM_144568	PIP4P1	TAGCAGCACGTAAATATTGGCG#TTTGCTGCTGCTAT#((((((((.(((((........#))))))))))))).	1336	1350	1.0	-16.2	1	0.00574827	0.456	6.225299875	4.89076513375	-5.962462745001676	13	14	13	3UTR	MIRT031583	1	1
hsa-miR-16-5p	NM_145331	MAP3K7	TAGCAGCACGTAAATATTGGCG#TGCCTATATTTGCTGCA#..((((((....(((((.((((#)))).))))))))))).	2127	2144	1.0	-16.7	1	0.1027827	0.647	0.9705725	1.3050675024999998	-13.427474630952936	15	17	11	3UTR	MIRT051235	0	1
hsa-miR-16-5p	NM_145332	MAP3K7	TAGCAGCACGTAAATATTGGCG#TGCCTATATTTGCTGCA#..((((((....(((((.((((#)))).))))))))))).	2011	2028	1.0	-16.7	1	0.1027827	0.647	1.5355978500000003	0.4965148237500001	-13.427474630952936	15	17	11	3UTR	MIRT051235	0	1
hsa-miR-16-5p	NM_145333	MAP3K7	TAGCAGCACGTAAATATTGGCG#TGCCTATATTTGCTGCA#..((((((....(((((.((((#)))).))))))))))).	1930	1947	1.0	-16.7	1	0.1027827	0.647	1.0044741666666666	0.5338069212500002	-13.427474630952936	15	17	11	3UTR	MIRT051235	0	1
hsa-miR-16-5p	NM_001300821	EIF4B	TAGCAGCACGTAAATATTGGCG#TGCGTGCTGCA#..((((((((((..........#)))))))))).	3395	3406	1.0	-18.9	1	0.0001026344	0.529	0.7669096599999999	0.22775851250000004	-8.071469890113187	10	11	10	3UTR	MIRT031710	1	0
hsa-miR-16-5p	NM_001300906	IBTK	TAGCAGCACGTAAATATTGGCG#TGCCAAGTATGTGTTGTTGC#((((((((((((....((((((#)))))).)))))))))))).	4917	4937	1.0	-19.0	1	0.0004073859	0.691	3.48856625	5.274575297499999	-7.052043616942562	18	20	12	3UTR	MIRT051292	0	0
hsa-miR-16-5p	NM_001302489	ACP2	TAGCAGCACGTAAATATTGGCG#TGCCTGTCACTCAGCATTCCCATGCCTGATGTTTACCAAGTGCTGTG#..((((((((((((((((((((#.)))).)))))))))...))))))).	1462	1509	1.0	-22.7	1	0.02771934	0.529	3.74394182875	3.2885634736249996	-4.95700071937229	20	26	9	3UTR	MIRT001481	0	0
hsa-miR-16-5p	NM_001302490	ACP2	TAGCAGCACGTAAATATTGGCG#TGCCTGTCACTCAGCATTCCCATGCCTGATGTTTACCAAGTGCTGTG#..((((((((((((((((((((#.)))).)))))))))...))))))).	1361	1408	1.0	-22.7	1	0.02771934	0.529	3.454437333333333	2.886407326125	-4.95700071937229	20	26	9	3UTR	MIRT001481	0	0
hsa-miR-16-5p	NM_001302491	ACP2	TAGCAGCACGTAAATATTGGCG#TGCCTGTCACTCAGCATTCCCATGCCTGATGTTTACCAAGTGCTGTG#..((((((((((((((((((((#.)))).)))))))))...))))))).	1268	1315	1.0	-22.7	1	0.02771934	0.529	2.899364879166667	3.517295514999999	-4.95700071937229	20	26	9	3UTR	MIRT001481	0	0
hsa-miR-16-5p	NM_001303264	TSC22D2	TAGCAGCACGTAAATATTGGCG#ATTTAGGTGCTGCA#..(((((((.(((((.......#))))).))))))).	9150	9164	1.0	-18.5	1	0.0006346965	0.632	0.0	0.0	-6.432556268004081	12	14	7	3UTR	MIRT465160	1	1
hsa-miR-16-5p	NM_001303625	RPL10	TAGCAGCACGTAAATATTGGCG#GCTTCCAATGTGCTGCC#..(((((((((.......(((.#)))....))))))))).	1004	1021	1.0	-17.0	1	0.04792321	0.471	0.0	0.0	-11.418273199709544	12	17	9	3UTR	MIRT031375	0	0
hsa-miR-16-5p	NM_001313965	TFRC	TAGCAGCACGTAAATATTGGCG#GCCAGTACGTGCTAACAGGCTC#.((((((((((....((((((.#))))))))))))).....))).	4503	4525	1.0	-19.2	1	0.00186711	0.603	0.5192120733333333	1.18345094	-10.021548237390759	16	22	13	3UTR	MIRT051253	1	0
hsa-miR-16-5p	NM_001318011	CARD19	TAGCAGCACGTAAATATTGGCG#CGCCAAGGGGACTGCTGCTT#.(((((((.((.....((((((#))))))....))))))))).	678	698	1.0	-21.1	1	0.0001373604	0.544	0.0	0.0	-11.310986975940136	15	20	9	3UTR	MIRT005261	0	0
hsa-miR-16-5p	NM_001319075	B3GNT2	TAGCAGCACGTAAATATTGGCG#TGCCATATTTTCACATGCTGCTT#.(((((((.(((((((.(((((#))))))))))..)).))))))).	2197	2220	1.0	-19.5	1	0.09078102	0.706	1.0692990999999998	1.23891951875	-4.849714495602881	19	23	10	3UTR	MIRT089106	0	1
hsa-miR-16-5p	NM_001319143	AK2	TAGCAGCACGTAAATATTGGCG#TGCTAATTTTATGTGCATGA#...(((((((((((.(((((((#)))))))))))))))).)).	2691	2711	1.0	-17.7	0	0.02730662	0.618	0.0	0.0	-7.249989753929374	18	20	16	3UTR	MIRT032010	0	0
hsa-miR-16-5p	NM_001319238	ZC3H11A	TAGCAGCACGTAAATATTGGCG#GTCAATGTTTCGTGTTCCGCA#..((((((((.((((((((((.#))))))))))))))))..)).	5108	5129	1.0	-19.9	1	0.01954881	0.647	1.4730511999999998	1.5915126762500003	-7.7817751947826395	18	21	16	3UTR	MIRT031561	1	1
hsa-miR-16-5p	NM_001319239	ZC3H11A	TAGCAGCACGTAAATATTGGCG#GTCAATGTTTCGTGTTCCGCA#..((((((((.((((((((((.#))))))))))))))))..)).	5003	5024	1.0	-19.9	1	0.01954881	0.647	1.4730511999999998	1.5915126762500003	-7.7817751947826395	18	21	16	3UTR	MIRT031561	1	1
hsa-miR-16-5p	NM_001319999	RACGAP1	TAGCAGCACGTAAATATTGGCG#ATGTGCTGCTGG#(((((((((((...........#))))))))))).	2675	2687	1.0	-17.6	1	0.008765795	0.574	3.4891027272727273	4.921103890000001	-10.39884692653892	11	12	11	3UTR	MIRT031559	0	0
hsa-miR-16-5p	NM_001321193	TBL1XR1	TAGCAGCACGTAAATATTGGCG#TGCTGATGTGCCACGATGCTGCTC#.((((((((((..(((((((((#)))))))))...))).))))))).	4479	4503	1.0	-22.1	1	0.002525273	0.574	2.2598741818181822	1.8433364274999997	-8.429258759619717	19	24	9	3UTR	MIRT726355	1	1
hsa-miR-16-5p	NM_001321194	TBL1XR1	TAGCAGCACGTAAATATTGGCG#TGCTGATGTGCCACGATGCTGCTC#.((((((((((..(((((((((#)))))))))...))).))))))).	4821	4845	1.0	-22.1	1	0.002525273	0.574	2.8860332181818182	1.8139044812500003	-8.429258759619717	19	24	9	3UTR	MIRT726355	1	1
hsa-miR-16-5p	NM_001322417	PNISR	TAGCAGCACGTAAATATTGGCG#ATGTGCTGCA#..(((((((((...........#))))))))).	1995	2005	1.0	-15.7	1	0.004882484	0.559	0.0	0.0	-11.418273199709544	9	10	9	3UTR	MIRT547066	1	1
hsa-miR-16-5p	NM_001330091	NRXN1	TAGCAGCACGTAAATATTGGCG#GCCATTTTTGGTAAATTCAATGTTATAAGTGTTGCTAA#(((((((((...((((((((..#.))))))))....))))))))).	3110	3148	1.0	-19.2	1	0.02005736	0.676	2.699414444444445	2.1790153512500003	-11.35165869953655	17	23	9	3UTR	MIRT051233	0	0
hsa-miR-16-5p	NM_001330092	NRXN1	TAGCAGCACGTAAATATTGGCG#GCCATTTTTGGTAAATTCAATGTTATAAGTGTTGCTAA#(((((((((...((((((((..#.))))))))....))))))))).	3119	3157	1.0	-19.2	1	0.02005736	0.676	2.9819522222222226	2.5954047762499997	-11.35165869953655	17	23	9	3UTR	MIRT051233	0	0
hsa-miR-16-5p	NM_000610	CD44	TAGCAGCACGTAAATATTGGCG#GCCACTATGTGTTGTTAC#((((((((((((.....((((.#)))).)))))))))))).	4240	4258	1.0	-18.6	1	0.01865939	0.588	0.0	0.0	-7.052043616942562	16	18	12	3UTR	MIRT031409	0	0
hsa-miR-16-5p	NM_000617	SLC11A2	TAGCAGCACGTAAATATTGGCG#TGTGCTGCTAC#((((((((((............#)))))))))).	3968	3979	1.0	-16.1	1	0.01791685	0.662	0.0	0.0	-13.223621401949268	10	11	10	3UTR	MIRT031729	0	1
hsa-miR-16-5p	NM_000876	IGF2R	TAGCAGCACGTAAATATTGGCG#GCCTGTGATGGTCACGTGTTGCA#..(((((((((...(((((((.#)))...))))...))))))))).	12204	12227	1.0	-20.6	1	8.308108e-05	0.529	0.0	0.0	-10.449774559155296	16	23	9	3UTR	MIRT001451	1	1
hsa-miR-16-5p	NM_000977	RPL13	TAGCAGCACGTAAATATTGGCG#GCCATGCTTGGTGCTGCA#..(((((((........((((.#))))......))))))).	1079	1097	1.0	-20.0	1	4.94367e-05	0.529	0.0	0.0	-15.485554143448072	11	18	7	3UTR	MIRT031830	0	0
hsa-miR-16-5p	NM_001001389	CD44	TAGCAGCACGTAAATATTGGCG#GCCACTATGTGTTGTTAC#((((((((((((.....((((.#)))).)))))))))))).	4111	4129	1.0	-18.6	1	0.01865939	0.588	0.0	0.0	-7.052043616942562	16	18	12	3UTR	MIRT031409	0	0
hsa-miR-16-5p	NM_001001390	CD44	TAGCAGCACGTAAATATTGGCG#GCCACTATGTGTTGTTAC#((((((((((((.....((((.#)))).)))))))))))).	3493	3511	1.0	-18.6	1	0.01865939	0.588	0.0	0.0	-7.052043616942562	16	18	12	3UTR	MIRT031409	0	0
hsa-miR-16-5p	NM_001001391	CD44	TAGCAGCACGTAAATATTGGCG#GCCACTATGTGTTGTTAC#((((((((((((.....((((.#)))).)))))))))))).	3097	3115	1.0	-18.6	1	0.01865939	0.588	0.0	0.0	-7.052043616942562	16	18	12	3UTR	MIRT031409	0	0
hsa-miR-16-5p	NM_001001392	CD44	TAGCAGCACGTAAATATTGGCG#GCCACTATGTGTTGTTAC#((((((((((((.....((((.#)))).)))))))))))).	2477	2495	1.0	-18.6	1	0.01865939	0.588	0.0	0.0	-7.052043616942562	16	18	12	3UTR	MIRT031409	0	0
hsa-miR-16-5p	NM_001002010	NT5C3A	TAGCAGCACGTAAATATTGGCG#TGGTGGTGTTTACAATGTTGCTAA#((((((((.((((((((((.((#)).))))))))))..)))))))).	1581	1605	1.0	-18.9	1	0.009057381	0.662	0.0	0.0	-4.993964104447428	20	24	10	3UTR	MIRT031382	0	0
hsa-miR-16-5p	NM_001002296	GOLGA7	TAGCAGCACGTAAATATTGGCG#TACGTGCTGCTT#.(((((((((((..........#))))))))))).	1412	1424	1.0	-19.5	1	0.0009883008	0.662	0.0	0.0	-6.907794008098015	11	12	11	3UTR	MIRT051297	0	0
hsa-miR-16-5p	NM_001012270	BIRC5	TAGCAGCACGTAAATATTGGCG#GGGTGCTGCTGG#(((((((((.(...........#).))))))))).	569	581	1.0	-16.2	1	1.591633e-08	0.412	0.0	0.0	-11.641353394867098	10	12	9	3UTR	MIRT054909	0	0
hsa-miR-16-5p	NM_001012271	BIRC5	TAGCAGCACGTAAATATTGGCG#GGGTGCTGCTGG#(((((((((.(...........#).))))))))).	756	768	1.0	-16.2	1	1.591633e-08	0.412	0.0	0.0	-11.641353394867098	10	12	9	3UTR	MIRT054909	0	0
hsa-miR-16-5p	NM_001014380	KATNAL1	TAGCAGCACGTAAATATTGGCG#GTATTTATTAAATGTGTTTTTCCTTACCTTTTGTGCTGCTAC#((((((((((........((..#.))........)))))))))).	7350	7392	1.0	-17.3	1	0.124914	0.676	0.0	0.0	-13.223621401949268	12	22	10	3UTR	MIRT031447	1	0
hsa-miR-16-5p	NM_001017395	TMCC1	TAGCAGCACGTAAATATTGGCG#TGTGGATATTTAAGTGTGCTGCTC#.(((((((((((((((((.(((#))).))))))))..))))))))).	3548	3572	1.0	-22.9	1	0.01356804	0.647	0.0	0.0	-3.793324837357118	20	24	9	3UTR	MIRT031658	1	1
hsa-miR-16-5p	NM_001024647	RAB3IP	TAGCAGCACGTAAATATTGGCG#TGTGCTGCTGA#((((((((((............#)))))))))).	7651	7662	1.0	-16.1	1	0.004262117	0.544	0.15437425999999999	0.12239944624999997	-13.223621401949268	10	11	10	3UTR	MIRT274742	0	1
hsa-miR-16-5p	NM_001025366	VEGFA	TAGCAGCACGTAAATATTGGCG#CGCCATTTTATTTTTCTTGCTGCTAA#((((((((.(.(((((.(((((#)))))...)))))..).)))))))).	1993	2019	1.0	-21.0	1	0.1771184	0.603	0.0	0.0	-7.8187385798577775	19	26	8	3UTR	MIRT003890	1	1
hsa-miR-16-5p	NM_001025367	VEGFA	TAGCAGCACGTAAATATTGGCG#CGCCATTTTATTTTTCTTGCTGCTAA#((((((((.(.(((((.(((((#)))))...)))))..).)))))))).	1924	1950	1.0	-21.0	1	0.1771184	0.603	0.0	0.0	-7.8187385798577775	19	26	8	3UTR	MIRT003890	1	1
hsa-miR-16-5p	NM_001025368	VEGFA	TAGCAGCACGTAAATATTGGCG#CGCCATTTTATTTTTCTTGCTGCTAA#((((((((.(.(((((.(((((#)))))...)))))..).)))))))).	1870	1896	1.0	-21.0	1	0.1771184	0.603	0.0	0.0	-7.8187385798577775	19	26	8	3UTR	MIRT003890	1	1
hsa-miR-16-5p	NM_001025369	VEGFA	TAGCAGCACGTAAATATTGGCG#CGCCATTTTATTTTTCTTGCTGCTAA#((((((((.(.(((((.(((((#)))))...)))))..).)))))))).	1835	1861	1.0	-21.0	1	0.1771184	0.603	0.0	0.0	-7.8187385798577775	19	26	8	3UTR	MIRT003890	1	1
hsa-miR-16-5p	NM_001025370	VEGFA	TAGCAGCACGTAAATATTGGCG#CGCCATTTTATTTTTCTTGCTGCTAA#((((((((.(.(((((.(((((#)))))...)))))..).)))))))).	1738	1764	1.0	-21.0	1	0.1771184	0.603	0.0	0.0	-7.8187385798577775	19	26	8	3UTR	MIRT003890	1	1
hsa-miR-16-5p	NM_001032288	UBE2V1	TAGCAGCACGTAAATATTGGCG#TGCCTTGGTTTTGGTGCTGCTGC#(((((((((..((((...((((#))))...))))..))))))))).	1669	1692	1.0	-22.9	1	3.553847e-05	0.471	0.0	0.0	-8.237904470243807	17	23	9	3UTR	MIRT001400	1	1
hsa-miR-16-5p	NM_001033756	VEGFA	TAGCAGCACGTAAATATTGGCG#CGCCATTTTATTTTTCTTGCTGCTAA#((((((((.(.(((((.(((((#)))))...)))))..).)))))))).	1804	1830	1.0	-21.0	1	0.1771184	0.603	0.0	0.0	-7.8187385798577775	19	26	8	3UTR	MIRT003890	1	1
hsa-miR-17-5p	NM_013262	MYLIP	CAAAGTGCTTACAGTGCAGGTAG#ACCTACACTGTCACTTTA#.((((((...((((((.((((..#)))).)))))))))))).	2799	2817	0.9538461538461539	-18.0	1	0.03641604	0.662	5.228166666666667	3.7224909999999993	-8.40585589311169	16	18	12	3UTR	MIRT485369	1	1
hsa-miR-17-5p	NM_020772	NUFIP2	CAAAGTGCTTACAGTGCAGGTAG#ACCTGTAAACTGTATCACTTTGA#(((((((..((((((((((((..#))))))..)))))).))))))).	4053	4076	0.9615384615384616	-23.6	1	0.0126597	0.735	0.9705805	0.5105845525000001	-7.307599033628058	19	23	7	3UTR	MIRT051019	1	1
hsa-miR-17-5p	NM_024312	GNPTAB	CAAAGTGCTTACAGTGCAGGTAG#CTACCTCAGCATTTACTGAGCATTTTA#.((((((((((.(((((((((((#))))))..)))))...)))))))))).	4077	4104	0.9615384615384616	-21.4	1	0.001920712	0.632	5.782960461538462	5.3674946125	-7.140128146953473	21	27	10	3UTR	MIRT557597	0	0
hsa-miR-17-5p	NM_024548	CEP97	CAAAGTGCTTACAGTGCAGGTAG#CCTGCAGAAGCACA#....((((((.(..((((((...#))))))))))))).	5244	5258	0.9615384615384616	-17.0	0	0.004869664	0.647	0.07727083333333334	0.22668608212500002	-14.51730747423493	13	14	13	3UTR	MIRT513992	1	1
hsa-miR-17-5p	NM_004901	ENTPD4	CAAAGTGCTTACAGTGCAGGTAG#TTACCTGCATCGTATTTGCGCTTC#..((((((.(((.((((((((((#)))))))))).)))...)))))).	3998	4022	0.9615384615384616	-23.6	1	0.006936989	0.515	4.8921054	4.34165752225	-7.302520990284295	19	24	10	3UTR	MIRT706121	1	1
hsa-miR-17-5p	NM_002203	ITGA2	CAAAGTGCTTACAGTGCAGGTAG#TGCTTGATATGTAAGTACTTC#..(((((((((((...((((((.#))))))...))))))))))).	4082	4103	0.9615384615384616	-21.1	1	0.04231888	0.691	0.0	0.0	-6.782339277446944	17	21	11	3UTR	MIRT448729	0	0
hsa-miR-17-5p	NM_003950	F2RL3	CAAAGTGCTTACAGTGCAGGTAG#CTGCCTGGCATGTGGCACTTTGT#((((((((.((((...(((((((#)))))))...)))))))))))).	2748	2771	0.9615384615384616	-26.2	1	4.827649e-05	0.5	2.340227125	5.31101585	-6.819302662522082	19	23	12	3UTR	MIRT552209	0	1
hsa-miR-17-5p	NM_001128930	ENTPD4	CAAAGTGCTTACAGTGCAGGTAG#TTACCTGCATCGTATTTGCGCTTC#..((((((.(((.((((((((((#)))))))))).)))...)))))).	3974	3998	0.9615384615384616	-23.6	1	0.006936989	0.515	2.2603809999999998	4.98940737725	-7.302520990284295	19	24	10	3UTR	MIRT706121	1	1
hsa-miR-17-5p	NM_052905	FMNL2	CAAAGTGCTTACAGTGCAGGTAG#ATCTGCTGTGGGTCCTTTGC#(((((.(((((((..((((((..#))))))))))))).))))).	4073	4093	0.9615384615384616	-18.9	0	0.003571881	0.632	1.528502857142857	1.0737766550000003	-7.430822685165753	18	20	13	3UTR	MIRT551749	0	0
hsa-miR-17-5p	NM_001303401	CEP97	CAAAGTGCTTACAGTGCAGGTAG#CCTGCAGAAGCACA#....((((((.(..((((((...#))))))))))))).	5067	5081	0.9615384615384616	-17.0	0	0.004869664	0.647	0.07727083333333334	0.22668608212500002	-14.51730747423493	13	14	13	3UTR	MIRT513992	1	1
hsa-miR-17-5p	NM_001019	RPS15A	CAAAGTGCTTACAGTGCAGGTAG#TGCCAGCATTGTAAGCCCTA#...((.(((((((((((.((((.#)))).))))))))))).)).	2025	2045	0.9615384615384616	-23.6	0	0.04007916	0.529	0.0	0.0	-8.415498954871785	17	20	11	3UTR	MIRT050832	0	0
hsa-miR-17-5p	NM_001030009	RPS15A	CAAAGTGCTTACAGTGCAGGTAG#TGCCAGCATTGTAAGCCCTA#...((.(((((((((((.((((.#)))).))))))))))).)).	1959	1979	0.9615384615384616	-23.6	0	0.04007916	0.529	0.0	0.0	-8.415498954871785	17	20	11	3UTR	MIRT050832	0	0
hsa-miR-17-5p	NM_012199	AGO1	CAAAGTGCTTACAGTGCAGGTAG#TCTGCACTGTCCTGCACTC#...(((((..((((((((((...#))))))))))...))))).	4266	4285	0.9692307692307692	-22.8	0	0.001441562	0.5	0.7647829	0.7711438112500002	-8.81343632025268	15	19	10	3UTR	MIRT050855	1	1
hsa-miR-17-5p	NM_015352	POFUT1	CAAAGTGCTTACAGTGCAGGTAG#TGCCTGTAATCCCAGCACTTTGC#(((((((((.....((((((((.#)))))))).....))))))))).	4697	4720	0.978021978021978	-23.8	1	0.002474258	0.426	0.34240600000000004	0.1417660645	-13.4976292297232	17	23	9	3UTR	MIRT152672	1	0
hsa-miR-17-5p	NM_005242	F2RL1	CAAAGTGCTTACAGTGCAGGTAG#TGCCTCATGCCTGTAATCCTAGCACTTTGG#(((((((((.....((((((((.#.)))))))).....))))))))).	1919	1949	0.978021978021978	-25.3	1	0.001684356	0.426	-0.09316022222222223	-0.1307003775	-13.4976292297232	17	24	9	3UTR	MIRT685265	0	0
hsa-miR-17-5p	NM_001330480	PIWIL2	CAAAGTGCTTACAGTGCAGGTAG#ACCTGTAATCCAAGCACTTTGG#((((((((((....(((((((..#)))))))....)))))))))).	3249	3271	1.0	-24.4	1	0.0001034234	0.397	0.13386636999999998	-0.16879410375000004	-12.25512276139502	17	22	10	3UTR	MIRT608373	0	0
hsa-miR-17-5p	NM_001330502	CAP1	CAAAGTGCTTACAGTGCAGGTAG#TCTGCTCTGAGAAGCACA#....((((((.(((.(((((...#))))).)))..)))))).	1616	1634	1.0	-19.7	0	7.577806e-05	0.574	2.857301666666667	2.975940025	-13.106786504298913	14	18	6	3UTR	MIRT050873	0	0
hsa-miR-17-5p	NM_001330623	ZNF7	CAAAGTGCTTACAGTGCAGGTAG#GCCAAGGGTGTGAGCACA#....(((((((((.(...(((..#)))...).))))))))).	1464	1482	1.0	-18.8	0	0.003671565	0.485	0.1449786666666667	-0.11830201899999997	-10.63645146646195	13	18	9	3UTR	MIRT683509	0	0
hsa-miR-17-5p	NM_001330989	RABGAP1L	CAAAGTGCTTACAGTGCAGGTAG#GCCAGGCATGGTGGCTCACATCTGTAATCCCAGCACTTTGG#(((((((((.....(((((((..#.))))))).....))))))))).	4078	4119	1.0	-20.8	1	4.702206e-05	0.441	0.0	0.0	-13.4976292297232	16	23	9	3UTR	MIRT687096	0	0
hsa-miR-17-5p	NM_001331029	PPP1R12B	CAAAGTGCTTACAGTGCAGGTAG#CTGCATTGAGGCGCTC#...(((((((.((((((((....#))))))))))))))).	3811	3827	1.0	-21.9	0	0.0007301868	0.515	0.062267874999999986	0.194229795	-9.33931466908909	15	16	15	3UTR	MIRT132393	0	1
hsa-miR-17-5p	NM_001345917	WDR53	CAAAGTGCTTACAGTGCAGGTAG#TCTGTCTGTTGAGCACTTA#..((((((((((((.(((((...#))))))))).)))))))).	1988	2007	1.0	-20.1	1	0.0003826041	0.603	0.19704933846153855	0.007924368750000021	-5.692450279622925	17	19	9	3UTR	MIRT614268	0	0
hsa-miR-17-5p	NM_001345918	WDR53	CAAAGTGCTTACAGTGCAGGTAG#TCTGTCTGTTGAGCACTTA#..((((((((((((.(((((...#))))))))).)))))))).	2068	2087	1.0	-20.1	1	0.0003826041	0.603	0.019948076923076895	-0.13903766474999998	-5.692450279622925	17	19	9	3UTR	MIRT614268	0	0
hsa-miR-17-5p	NM_001346252	USP28	CAAAGTGCTTACAGTGCAGGTAG#CTGCCTGCCTCTTGCACA#....((((....((.((((((((#))))))))))...)))).	3526	3544	1.0	-20.4	0	0.001345356	0.456	4.047126475	5.207678163750001	-18.752485940469207	14	18	10	3UTR	MIRT726170	1	1
hsa-miR-17-5p	NM_001346516	LCOR	CAAAGTGCTTACAGTGCAGGTAG#ACCTGTATTGTATCATTGGGG#(..((((..((((((((((((..#)))))))))))).))))..).	14676	14697	1.0	-20.1	0	0.04396798	0.5	1.2060275833333332	1.3110898825	-10.02881438994968	17	21	12	3UTR	MIRT050889	1	1
hsa-miR-17-5p	NM_001346516	LCOR	CAAAGTGCTTACAGTGCAGGTAG#ACTTGTACTGTAGCCGAGAAGACCACCATCATGCACA#....(((((((((((((((((..#)))))))))))))...................)))).	5542	5579	1.0	-20.2	0	0.07272794	0.485	3.2488190000000015	2.4911700650000004	-9.546562468637928	17	37	13	3UTR	MIRT050889	1	1
hsa-miR-17-5p	NM_001346687	ADARB1	CAAAGTGCTTACAGTGCAGGTAG#CTCCTGTCTCTGGCAGCACTGTCTGCACTTTC#.(((((((..(((((((.(.(((#.))).).)))))))..))))))).	2880	2912	1.0	-24.5	1	0.01988111	0.529	0.0	0.0	-6.09222096393106	18	24	7	3UTR	MIRT050812	0	1
hsa-miR-17-5p	NM_001348217	TCF4	CAAAGTGCTTACAGTGCAGGTAG#CTCCCTGCATTGATGTACATTTTAAGAATGGCACTTTT#.((((((((..(((((((((.((#)).))))))))).................)))))))).	4835	4873	1.0	-21.4	1	0.003445613	0.676	2.5500965555555557	2.9441394725000007	-7.8606057810956464	19	38	9	3UTR	MIRT726345	1	1
hsa-miR-17-5p	NM_001349206	LPIN1	CAAAGTGCTTACAGTGCAGGTAG#ATCACCACTGTAAGCACA#....((((((((((((..(((..#)))..)))))))))))).	5294	5312	1.0	-22.1	0	0.01114225	0.676	0.0	0.0	-9.546562468637928	15	18	12	3UTR	MIRT050981	0	1
hsa-miR-17-5p	NM_001349304	SEPTIN2	CAAAGTGCTTACAGTGCAGGTAG#CTGCACTTTAGTGTATTTTCTGTCACTGTAGGTATA#....((((((((((((((((...#.)))).)))))))))))).	2081	2117	1.0	-21.4	0	0.0001467039	0.574	0.24798409999999999	-0.038434988500000045	-9.546562468637928	16	19	12	3UTR	MIRT050919	1	1
hsa-miR-17-5p	NM_001350477	CAP1	CAAAGTGCTTACAGTGCAGGTAG#TCTGCTCTGAGAAGCACA#....((((((.(((.(((((...#))))).)))..)))))).	1622	1640	1.0	-19.7	0	7.577806e-05	0.574	2.857301666666667	2.975940025	-13.106786504298913	14	18	6	3UTR	MIRT050873	0	0
hsa-miR-17-5p	NM_001350482	CAP1	CAAAGTGCTTACAGTGCAGGTAG#TCTGCTCTGAGAAGCACA#....((((((.(((.(((((...#))))).)))..)))))).	1619	1637	1.0	-19.7	0	7.577806e-05	0.574	2.857301666666667	2.975940025	-13.106786504298913	14	18	6	3UTR	MIRT050873	0	0
hsa-miR-17-5p	NM_001350483	CAP1	CAAAGTGCTTACAGTGCAGGTAG#TCTGCTCTGAGAAGCACA#....((((((.(((.(((((...#))))).)))..)))))).	1601	1619	1.0	-19.7	0	7.577806e-05	0.574	2.857301666666667	2.975940025	-13.106786504298913	14	18	6	3UTR	MIRT050873	0	0
[truncated: 6,357 more rows]

## Sheet: Sheet3
Dataset: Myometrium out of plac invasion_incr vs creta
[truncated: 500 more rows]
