# Supplementary material for: Diagnostic Role of Cell-Free miRNAs in Identifying Placenta Accreta Spectrum during the First-Trimester Screening
Source: Preprints.org preprint supplement (doi:10.20944/preprints202312.0752.v1), 2023-12-12
Supplement: Supplementary file 8 [file Table S7.xlsx]

## Sheet: Sheet1
Blood plasma, 3rd trimester, creta vs pregnancy without complications
Gene	baseMean	log2FoldChange	lfcSE	stat	pvalue
hsa-miR-323a-3p	3.6306	-3.86256	1.22084	-3.16385	0.00155696
hsa-miR-409-3p	42.8743	-1.62547	0.548852	-2.96158	0.00306065
hsa-miR-432-5p	12.8063	-2.01359	0.708805	-2.84082	0.00449973
hsa-miR-340-3p	2.09388	4.10136	1.51193	2.71266	0.00667461
hsa-miR-27b-3p	257.492	-1.01802	0.423912	-2.40149	0.0163283
hsa-miR-1-3p	52.6229	-2.67622	1.12416	-2.38064	0.0172826
hsa-miR-324-3p	1.51794	3.73479	1.68189	2.22059	0.0263786
hsa-miR-1283	7.20313	-1.5458	0.700817	-2.20572	0.0274039
hsa-miR-381-3p	2.37761	-2.80599	1.31964	-2.12634	0.0334753
hsa-miR-139-5p	57.4476	-1.35399	0.656908	-2.06115	0.0392885
hsa-miR-125a-5p	409.006	-1.46291	0.721678	-2.02709	0.0426535
hsa-miR-195-5p	1.31135	-4.14473	2.10548	-1.96855	0.0490048

## Sheet: Sheet2
Blood plasma, 3rd trimester, increta vs pregnancy without complications
Gene	baseMean	log2FoldChange	lfcSE	stat	pvalue
hsa-miR-199a-5p	380.931	4.91649	0.839414	5.85705	4.71e-09
hsa-let-7e-5p	212.587	5.61968	0.96392	5.83004	5.54e-09
hsa-miR-329-3p	14.4809	7.54627	1.31305	5.74714	9.08e-09
hsa-miR-23b-3p	419.922	7.54924	1.32087	5.71535	1.09e-08
hsa-miR-127-3p	150.764	5.7634	1.041	5.53641	3.09e-08
hsa-miR-199a-3p	849.198	3.99463	0.726959	5.49499	3.91e-08
hsa-miR-199b-3p	424.475	3.99951	0.729977	5.47894	4.28e-08
hsa-miR-23a-3p	229.852	4.39295	0.814878	5.39093	7.01e-08
hsa-miR-152-3p	71.9831	3.5409	0.677283	5.22809	1.71e-07
hsa-miR-2110	41.024	-2.46502	0.472129	-5.22108	1.78e-07
hsa-miR-149-5p	70.3327	6.86317	1.32492	5.18004	2.22e-07
hsa-miR-145-5p	550.58	10.101	1.97027	5.12668	2.95e-07
hsa-miR-574-3p	56.6371	5.50426	1.12896	4.87551	1.09e-06
hsa-miR-205-5p	42.6373	7.78939	1.67224	4.65806	3.19e-06
hsa-miR-143-5p	90.5413	6.71976	1.46154	4.59773	4.27e-06
hsa-miR-186-5p	339.669	-1.61166	0.35265	-4.57015	4.87e-06
hsa-miR-214-3p	36.6869	8.33287	1.82866	4.55682	5.19e-06
hsa-miR-99b-5p	429.575	3.61184	0.79887	4.52118	6.15e-06
hsa-miR-28-3p	117.522	3.12254	0.697814	4.47475	7.65e-06
hsa-miR-26a-5p	4283.53	1.60117	0.364354	4.39455	1.11e-05
hsa-miR-379-5p	8.63353	5.63532	1.28424	4.38805	1.14e-05
hsa-miR-193b-3p	39.5125	9.03014	2.07054	4.36124	1.29e-05
hsa-miR-483-3p	79.4044	5.66908	1.31696	4.30468	1.67e-05
hsa-miR-143-3p	4562.54	4.07288	0.952135	4.27763	1.89e-05
hsa-miR-27b-3p	943.119	3.16509	0.74849	4.22864	2.35e-05
hsa-miR-29a-3p	161.211	3.07296	0.732959	4.19255	2.76e-05
hsa-miR-455-3p	26.3541	8.44908	2.02504	4.17231	3.02e-05
hsa-miR-221-3p	339.248	2.27708	0.557177	4.08683	4.37e-05
hsa-miR-28-5p	21.0299	4.63991	1.14376	4.05671	4.98e-05
hsa-miR-411-5p	5.11357	6.01959	1.4911	4.03701	5.41e-05
hsa-miR-125b-5p	1044.69	3.68844	0.914451	4.0335	5.5e-05
hsa-miR-365a-3p	20.4441	8.08546	2.00862	4.02538	5.69e-05
hsa-miR-365b-3p	20.4441	8.08546	2.00862	4.02538	5.69e-05
hsa-miR-9-5p	16.7413	5.08267	1.27111	3.9986	6.37e-05
hsa-miR-195-5p	5.9054	6.33219	1.59067	3.98083	6.87e-05
hsa-miR-27b-5p	4.6295	5.92933	1.49644	3.96229	7.42e-05
hsa-miR-224-5p	83.326	2.65782	0.672559	3.95179	7.76e-05
hsa-miR-519d-3p	20.8227	6.22577	1.57586	3.95071	7.79e-05
hsa-miR-654-3p	12.3033	3.77274	0.963941	3.91387	9.08e-05
hsa-miR-381-3p	8.25265	4.66238	1.20376	3.87319	0.00010742
hsa-miR-133a-3p	63.86	5.49497	1.43812	3.82094	0.000132946
hsa-miR-518b	35.9723	5.02299	1.31553	3.81823	0.000134415
hsa-miR-493-3p	10.2101	4.30615	1.14259	3.76875	0.000164064
hsa-miR-520g-3p	20.7395	8.10402	2.17025	3.73414	0.000188355
hsa-miR-504-5p	10.1268	6.48899	1.7574	3.69239	0.000222158
hsa-miR-501-3p	62.9515	-2.33624	0.637591	-3.66417	0.000248139
hsa-miR-99b-3p	29.8253	4.53276	1.24359	3.6449	0.000267494
hsa-miR-15a-5p	6.8948	-3.75679	1.03929	-3.61478	0.000300603
hsa-miR-517a-3p	122.856	4.33679	1.21225	3.57747	0.000346939
hsa-miR-517b-3p	122.856	4.33679	1.21225	3.57747	0.000346939
hsa-miR-625-3p	28.8052	-2.59956	0.732639	-3.54822	0.000387844
hsa-miR-1323	485.259	4.09601	1.15861	3.53528	0.000407346
hsa-miR-493-5p	46.2262	5.55627	1.57198	3.53457	0.000408439
hsa-miR-200c-3p	160.308	4.06078	1.14966	3.53217	0.000412162
hsa-miR-518a-3p	15.7268	7.7075	2.19221	3.51586	0.000438329
hsa-miR-625-5p	28.3985	-2.57491	0.735007	-3.50324	0.000459631
hsa-miR-99a-5p	1024.41	2.51323	0.718843	3.49621	0.00047192
hsa-miR-425-5p	94.6865	-1.9944	0.576698	-3.45832	0.00054356
hsa-miR-409-3p	79.7419	2.45499	0.710486	3.45537	0.000549534
hsa-miR-148b-3p	306.71	2.22729	0.651494	3.41874	0.000629119
hsa-miR-195-3p	10.1432	3.70629	1.09858	3.3737	0.000741647
hsa-miR-125a-5p	1142.41	3.08089	0.91466	3.36834	0.000756213
hsa-miR-181a-5p	868.879	3.08306	0.925586	3.33093	0.000865566
hsa-miR-512-3p	130.221	3.70375	1.11389	3.32506	0.00088401
hsa-miR-520a-3p	27.931	3.90139	1.17696	3.31481	0.000917041
hsa-miR-497-5p	7.41206	6.64056	2.01403	3.29715	0.000976712
hsa-miR-526b-5p	51.1333	3.98292	1.20852	3.29569	0.000981805
hsa-miR-517c-3p	5.64043	5.57021	1.69226	3.29157	0.000996283
hsa-miR-370-3p	33.7131	4.32736	1.32507	3.26576	0.00109172
hsa-miR-516a-5p	62.6212	3.35559	1.02995	3.258	0.00112199
hsa-miR-151a-5p	9.89296	2.59334	0.798238	3.24884	0.00115878
hsa-miR-17-5p	65.6515	-1.80393	0.557702	-3.23459	0.00121819
hsa-miR-197-3p	38.5285	2.33508	0.722786	3.23066	0.00123505
hsa-miR-433-3p	9.81417	4.97115	1.54664	3.21417	0.0013082
hsa-miR-361-5p	12.2816	3.07294	0.956322	3.21328	0.00131226
hsa-miR-365a-5p	3.14344	5.42372	1.69009	3.20913	0.00133138
hsa-miR-498	9.32348	6.9614	2.18022	3.19298	0.00140814
hsa-miR-494-3p	4.85137	4.76812	1.50812	3.16164	0.00156886
hsa-miR-532-5p	283.961	-1.35577	0.429941	-3.15339	0.00161388
hsa-miR-543	49.6778	3.08591	0.983563	3.13748	0.00170407
hsa-miR-24-3p	659.234	1.51108	0.482607	3.13108	0.00174164
hsa-miR-484	324.919	-1.63033	0.530025	-3.07594	0.00209839
hsa-let-7b-5p	8892.37	-1.18948	0.388221	-3.06391	0.00218462
hsa-miR-20a-5p	190.625	-2.34847	0.771703	-3.04323	0.00234052
hsa-miR-30e-5p	534.377	-2.34296	0.770611	-3.04039	0.0023627
hsa-miR-184	3.17223	4.79144	1.58028	3.03202	0.00242927
hsa-miR-505-3p	17.3975	3.30231	1.09735	3.00937	0.00261794
hsa-miR-874-3p	8.44903	3.55286	1.19063	2.98403	0.00284483
hsa-miR-495-3p	9.11295	3.94998	1.32397	2.98345	0.00285021
hsa-miR-101-3p	1476.34	-2.54283	0.855071	-2.97382	0.00294117
hsa-miR-181b-5p	74.1225	3.00368	1.02506	2.93024	0.00338696
hsa-miR-323a-3p	5.39401	4.29315	1.47819	2.90432	0.00368047
hsa-miR-1301-3p	11.4767	1.79716	0.621417	2.89203	0.00382759
hsa-miR-522-3p	36.3866	3.48093	1.21191	2.87227	0.00407537
hsa-miR-193a-5p	35.0156	1.90334	0.667818	2.8501	0.00437062
hsa-miR-185-5p	376.02	-2.20923	0.779784	-2.83313	0.00460939
hsa-miR-25-3p	2172.14	-2.42555	0.875175	-2.7715	0.0055799
hsa-miR-1296-5p	4.09641	5.8017	2.11331	2.74531	0.00604538
hsa-miR-410-3p	2.84553	5.10533	1.8795	2.71633	0.00660105
hsa-miR-411-3p	2.44222	4.88883	1.80058	2.71514	0.00662468
hsa-miR-107	145.294	-1.66439	0.618351	-2.69167	0.00710962
hsa-miR-106a-5p	6.56556	-3.01833	1.12512	-2.68267	0.00730381
hsa-miR-15b-3p	26.1872	-2.94043	1.09894	-2.67569	0.00745754
hsa-miR-518e-3p	8.5007	5.52097	2.06621	2.67203	0.00753946
hsa-miR-505-5p	12.2361	-2.32605	0.873384	-2.66327	0.00773858
hsa-miR-30c-5p	235.542	1.90661	0.718736	2.65273	0.0079843
hsa-miR-1247-5p	3.95979	5.75109	2.17581	2.6432	0.00821268
hsa-miR-16-5p	791.314	-2.27111	0.861304	-2.63683	0.00836847
hsa-miR-339-5p	8.64246	2.52614	0.969838	2.6047	0.00919536
hsa-miR-675-5p	3.37961	4.90704	1.88613	2.60164	0.0092779
hsa-miR-199b-5p	10.537	3.81448	1.46644	2.60118	0.0092904
hsa-let-7d-5p	430.687	1.18253	0.460179	2.56972	0.010178
hsa-miR-181a-2-3p	21.6076	2.90578	1.14	2.54892	0.0108058
hsa-miR-100-5p	365.47	1.71614	0.676476	2.53689	0.0111843
hsa-miR-132-5p	2.91303	4.69653	1.86213	2.52213	0.0116646
hsa-miR-196b-5p	18.0575	2.54211	1.00915	2.51907	0.0117666
hsa-miR-518e-5p	67.4091	2.78209	1.10445	2.51898	0.0117694
hsa-miR-519b-5p	67.4091	2.78209	1.10445	2.51898	0.0117694
hsa-miR-519c-5p	67.4091	2.78209	1.10445	2.51898	0.0117694
hsa-miR-522-5p	67.4091	2.78209	1.10445	2.51898	0.0117694
hsa-miR-523-5p	67.4091	2.78209	1.10445	2.51898	0.0117694
hsa-miR-142-3p	9.4509	-2.24383	0.891159	-2.51788	0.0118064
hsa-miR-432-5p	17.3906	2.24921	0.904719	2.48609	0.0129155
hsa-miR-363-3p	201.867	-2.22635	0.896408	-2.48364	0.0130049
hsa-miR-93-5p	159.181	-1.15092	0.463881	-2.48107	0.0130987
hsa-miR-7-5p	355.449	-2.24891	0.909392	-2.47298	0.013399
hsa-miR-455-5p	5.03611	4.72005	1.90964	2.4717	0.0134473
hsa-miR-487b-3p	4.11275	3.8711	1.57685	2.45496	0.0140901
hsa-miR-134-5p	9.89217	2.34263	0.956853	2.44826	0.0143548
hsa-miR-92a-3p	27461.1	-2.28359	0.936695	-2.43793	0.0147718
hsa-miR-92b-5p	12.2958	-1.74497	0.717833	-2.43089	0.0150618
hsa-miR-125b-2-3p	13.2236	3.83263	1.59361	2.405	0.0161726
hsa-let-7a-5p	11557.7	1.45127	0.6055	2.39681	0.0165386
hsa-miR-132-3p	3.92111	3.30995	1.3882	2.38434	0.0171097
hsa-miR-519a-5p	76.0335	2.57499	1.08179	2.3803	0.0172986
hsa-miR-744-5p	94.0542	1.07578	0.459453	2.34144	0.0192095
hsa-miR-328-3p	94.5444	1.41081	0.603132	2.33914	0.0193281
hsa-miR-516b-5p	489.398	2.38355	1.01923	2.33859	0.0193568
hsa-miR-181d-5p	2.69156	5.20925	2.2365	2.3292	0.0198485
hsa-miR-382-5p	10.2164	1.94043	0.838321	2.31466	0.0206314
hsa-miR-3615	113.268	-2.03699	0.891851	-2.28401	0.0223711
hsa-miR-518c-5p	9.03983	4.07713	1.80698	2.25632	0.0240509
hsa-miR-487a-5p	3.46921	2.74117	1.21583	2.25457	0.0241606
hsa-miR-34c-5p	2.31932	4.36933	1.94312	2.24862	0.0245369
hsa-miR-182-5p	56.4626	-1.99622	0.892894	-2.23567	0.0253734
hsa-miR-222-3p	256.936	0.968096	0.433627	2.23256	0.0255782
hsa-miR-1-3p	59.1399	2.7004	1.21139	2.22918	0.0258022
hsa-miR-95-3p	7.39333	2.46725	1.10925	2.22425	0.0261316
hsa-miR-629-5p	97.9332	-1.60339	0.725255	-2.2108	0.0270499
hsa-miR-34a-5p	2.19199	4.2887	1.93998	2.2107	0.0270569
hsa-miR-423-3p	8.35249	2.32738	1.05696	2.20196	0.0276678
hsa-miR-361-3p	49.085	1.26557	0.577807	2.1903	0.0285025
hsa-miR-483-5p	35.1069	1.77711	0.812232	2.18793	0.0286746
hsa-miR-409-5p	2.79394	4.21741	1.92835	2.18705	0.0287387
hsa-miR-378a-5p	3.2139	3.60537	1.66246	2.1687	0.0301057
hsa-miR-145-3p	53.7311	2.36944	1.09559	2.16271	0.0305631
hsa-miR-30b-5p	22.8631	1.96344	0.911301	2.15455	0.0311971
hsa-miR-106b-5p	34.1921	-1.90224	0.885458	-2.14831	0.0316891
hsa-miR-451a	18302.8	-2.46786	1.16624	-2.11608	0.0343376
hsa-let-7b-3p	17.4097	1.97441	0.934905	2.11188	0.0346968
hsa-miR-525-5p	10.1289	4.46217	2.12388	2.10095	0.0356455
hsa-miR-16-2-3p	1040.97	-2.39849	1.18234	-2.0286	0.042499
hsa-miR-194-5p	139.102	-1.89005	0.940076	-2.01053	0.0443748
hsa-miR-1292-5p	2.70232	-2.64127	1.31461	-2.00917	0.0445195
hsa-miR-320b	261.1123167	-0.934802	0.527711	-1.77143	0.0464894
hsa-miR-378a-3p	192.424	0.915693	0.463704	1.97474	0.0482979
hsa-let-7c-5p	1205.09	1.30346	0.664489	1.96159	0.0498099

## Sheet: Sheet3
Blood plasma, 3rd trimester, percreta vs pregnancy without complications
Gene	baseMean	log2FoldChange	lfcSE	stat	pvalue
hsa-miR-142-5p	1315.09	-7.46971	0.367691	-20.3152	9.44e-92
hsa-miR-451a	24432.1	-6.68366	0.358363	-18.6505	1.25e-77
hsa-miR-16-2-3p	1384.13	-6.73894	0.407193	-16.5497	1.61e-61
hsa-miR-7-5p	472.897	-4.43959	0.281859	-15.7511	6.75e-56
hsa-miR-23a-3p	421.391	4.7437	0.335009	14.1599	1.62e-45
hsa-miR-16-5p	1058.37	-4.39891	0.310753	-14.1557	1.72e-45
hsa-miR-486-5p	276.779	-6.66658	0.516722	-12.9017	4.4e-38
hsa-miR-99b-5p	1023.92	4.36513	0.345881	12.6203	1.63e-36
hsa-miR-92a-3p	37075.6	-4.52031	0.359814	-12.5629	3.38e-36
hsa-miR-25-3p	2943.62	-4.55861	0.363673	-12.5349	4.81e-36
hsa-miR-20a-5p	259.405	-3.88296	0.313956	-12.3679	3.9e-35
hsa-miR-23b-3p	980.945	8.21375	0.68343	12.0184	2.84e-33
hsa-miR-101-3p	2017.97	-4.76422	0.401499	-11.8661	1.78e-32
hsa-let-7e-5p	470.468	6.26995	0.553704	11.3237	1e-29
hsa-miR-192-5p	407.175	-5.28353	0.466959	-11.3148	1.11e-29
hsa-miR-221-3p	713.057	2.94218	0.262973	11.1881	4.66e-29
hsa-miR-199a-5p	1097.89	5.94086	0.533129	11.1434	7.71e-29
hsa-miR-223-5p	130.312	-7.08774	0.638146	-11.1068	1.16e-28
hsa-miR-30e-5p	735.062	-3.71534	0.335024	-11.0898	1.41e-28
hsa-miR-148b-3p	654.056	2.90279	0.270176	10.7441	6.32e-27
hsa-miR-185-5p	511.992	-3.72304	0.350883	-10.6105	2.66e-26
hsa-miR-145-5p	1563.58	11.245	1.06998	10.5095	7.81e-26
hsa-miR-199a-3p	2317.02	4.98016	0.496638	10.0277	1.15e-23
hsa-miR-199b-3p	1157.92	4.98495	0.5013	9.94405	2.68e-23
hsa-miR-127-3p	507.589	6.9708	0.713809	9.76564	1.58e-22
hsa-miR-27b-3p	2239.62	3.96218	0.410393	9.6546	4.7e-22
hsa-miR-144-3p	106.459	-5.1965	0.545626	-9.52392	1.67e-21
hsa-miR-493-5p	186.266	7.19908	0.789586	9.11754	7.68e-20
hsa-miR-363-3p	275.885	-3.39291	0.37579	-9.02873	1.74e-19
hsa-miR-193b-3p	56.9508	9.00231	1.00335	8.97226	2.9e-19
hsa-miR-224-5p	218.658	3.65815	0.410241	8.91707	4.79e-19
hsa-miR-3613-5p	81.8818	-6.14416	0.690435	-8.89898	5.64e-19
hsa-miR-574-3p	132.147	6.20023	0.714788	8.67422	4.16e-18
hsa-miR-143-5p	287.134	7.74127	0.894723	8.65214	5.05e-18
hsa-miR-455-3p	77.2694	9.44358	1.10433	8.55138	1.22e-17
hsa-miR-214-3p	112.724	9.40492	1.10952	8.4766	2.32e-17
hsa-miR-99b-3p	82.1762	5.40919	0.6429	8.41374	3.97e-17
hsa-miR-29a-3p	290.882	3.47366	0.414534	8.37967	5.31e-17
hsa-miR-365a-3p	34.2089	8.26781	1.00716	8.20905	2.23e-16
hsa-miR-365b-3p	34.2089	8.26781	1.00716	8.20905	2.23e-16
hsa-miR-19b-3p	78.5241	-3.83171	0.467966	-8.18801	2.66e-16
hsa-miR-629-5p	128.469	-2.84347	0.349091	-8.14535	3.78e-16
hsa-miR-501-3p	87.1518	-3.06442	0.392645	-7.80454	5.97e-15
hsa-miR-504-5p	46.227	8.11542	1.06456	7.62324	2.47e-14
hsa-miR-148a-3p	1789.71	-2.02413	0.267641	-7.56285	3.94e-14
hsa-miR-125b-5p	2353.74	4.36509	0.580898	7.51438	5.72e-14
hsa-miR-3615	152.548	-3.48399	0.46365	-7.51426	5.72e-14
hsa-miR-493-3p	31.9064	5.35309	0.731745	7.31551	2.56e-13
hsa-miR-874-3p	25.2988	4.58356	0.631346	7.25998	3.87e-13
hsa-miR-149-5p	137.384	7.36568	1.02193	7.20759	5.69e-13
hsa-miR-143-3p	11156	4.87265	0.692035	7.04105	1.91e-12
hsa-miR-182-5p	73.4127	-4.5178	0.646901	-6.98375	2.87e-12
hsa-miR-20b-5p	38.3713	-4.18573	0.599747	-6.97917	2.97e-12
hsa-miR-329-3p	24.47	7.78599	1.13811	6.84117	7.86e-12
hsa-miR-106b-5p	45.3489	-2.9225	0.432405	-6.75871	1.39e-11
hsa-miR-100-5p	918.242	2.77396	0.412199	6.72966	1.7e-11
hsa-miR-125a-5p	2144.62	3.50446	0.520804	6.72894	1.71e-11
hsa-miR-152-3p	164.973	4.2514	0.634838	6.69682	2.13e-11
hsa-miR-381-3p	32.4274	6.12585	0.917627	6.67575	2.46e-11
hsa-miR-194-5p	182.31	-3.6844	0.552005	-6.67459	2.48e-11
hsa-miR-1296-5p	14.1342	6.99093	1.05665	6.6161	3.69e-11
hsa-miR-30a-5p	239.353	2.59208	0.395844	6.54823	5.82e-11
hsa-miR-379-5p	21.7531	6.45173	0.986576	6.53951	6.17e-11
hsa-miR-24-3p	1125.03	1.84868	0.288294	6.41249	1.43e-10
hsa-miR-433-3p	45.862	6.90045	1.08535	6.3578	2.05e-10
hsa-miR-26a-5p	6513.13	1.69177	0.271991	6.21998	4.97e-10
hsa-miR-28-3p	251.733	3.74467	0.605342	6.18604	6.17e-10
hsa-miR-494-3p	16.9013	6.07813	1.00001	6.07807	1.22e-09
hsa-miR-411-5p	10.4688	6.55988	1.08155	6.06526	1.32e-09
hsa-miR-30c-5p	509.764	2.6422	0.436116	6.0585	1.37e-09
hsa-miR-425-5p	134.054	-2.45296	0.405171	-6.05414	1.41e-09
hsa-miR-28-5p	49.1615	5.3134	0.882085	6.02368	1.7e-09
hsa-miR-128-3p	900.879	-2.71917	0.456315	-5.95898	2.54e-09
hsa-miR-126-5p	88.788	-1.86749	0.314376	-5.94029	2.85e-09
hsa-miR-497-5p	17.1288	7.27107	1.23993	5.86409	4.52e-09
hsa-miR-144-5p	21.2896	-4.31882	0.771614	-5.59712	2.18e-08
hsa-miR-2110	60.5612	-2.40412	0.431478	-5.57183	2.52e-08
hsa-miR-455-5p	14.2685	5.47189	0.982565	5.56899	2.56e-08
hsa-miR-518b	109.906	6.0991	1.09677	5.56094	2.68e-08
hsa-miR-487b-3p	14.2695	5.01514	0.905159	5.54062	3.01e-08
hsa-miR-361-5p	23.0585	3.3388	0.611382	5.46106	4.73e-08
hsa-miR-1247-5p	10.3344	6.54186	1.19895	5.4563	4.86e-08
hsa-let-7a-5p	23558.9	2.15833	0.397296	5.43255	5.56e-08
hsa-miR-199b-5p	36.3733	5.02492	0.92675	5.42208	5.89e-08
hsa-miR-654-3p	27.0093	4.39047	0.81066	5.41592	6.1e-08
hsa-miR-181a-5p	1903.39	3.74056	0.703965	5.31356	1.08e-07
hsa-miR-222-3p	433.893	1.33858	0.253676	5.27671	1.32e-07
hsa-miR-409-5p	10.0878	5.40256	1.0265	5.26307	1.42e-07
hsa-miR-181d-5p	7.15874	6.01469	1.16251	5.17389	2.29e-07
hsa-miR-197-3p	80.4129	2.92253	0.565501	5.16803	2.37e-07
hsa-miR-377-5p	5.80853	5.70432	1.10378	5.16798	2.37e-07
hsa-miR-339-5p	20.6952	3.2404	0.627269	5.16589	2.39e-07
hsa-miR-378a-3p	368.655	1.55051	0.300945	5.15213	2.58e-07
hsa-miR-34a-5p	7.86615	5.5351	1.07783	5.13539	2.82e-07
hsa-miR-151a-3p	545.111	-1.25441	0.24529	-5.11397	3.15e-07
hsa-miR-520g-3p	63.2073	9.15266	1.79137	5.10932	3.23e-07
hsa-miR-99a-5p	2488.6	3.40015	0.666578	5.1009	3.38e-07
hsa-miR-370-3p	132.632	5.78188	1.13728	5.08396	3.7e-07
hsa-miR-519d-3p	56.632	7.10646	1.40383	5.06219	4.14e-07
hsa-miR-133a-3p	246.873	6.93522	1.37136	5.0572	4.25e-07
hsa-miR-15b-3p	36.4207	-4.33248	0.858037	-5.04929	4.43e-07
hsa-miR-146a-5p	330.269	-2.09783	0.415885	-5.04425	4.55e-07
hsa-miR-4508	16.8838	-3.17398	0.634216	-5.00457	5.6e-07
hsa-miR-1301-3p	20.6578	2.19689	0.449575	4.88658	1.03e-06
hsa-miR-195-5p	10.7636	6.60212	1.35808	4.86135	1.17e-06
hsa-miR-517a-3p	431.17	5.68244	1.16978	4.8577	1.19e-06
hsa-miR-517b-3p	431.17	5.68244	1.16978	4.8577	1.19e-06
hsa-miR-518a-3p	60.8921	9.09877	1.87826	4.84425	1.27e-06
hsa-miR-382-5p	25.3975	2.92266	0.60447	4.83509	1.33e-06
hsa-miR-365a-5p	4.70826	5.40867	1.12024	4.82815	1.38e-06
hsa-miR-142-3p	12.4905	-2.89603	0.600438	-4.82319	1.41e-06
hsa-miR-9-5p	16.8199	4.47109	0.936188	4.77585	1.79e-06
hsa-miR-483-3p	124.87	5.77827	1.21647	4.75004	2.03e-06
hsa-miR-107	200.711	-2.12523	0.450602	-4.71643	2.4e-06
hsa-miR-1323	1345.99	5.10203	1.09069	4.6778	2.9e-06
hsa-miR-200c-3p	461.611	5.11285	1.10886	4.61089	4.01e-06
hsa-miR-17-5p	94.2804	-1.95683	0.426042	-4.59304	4.37e-06
hsa-miR-369-3p	4.1324	5.21895	1.14642	4.55241	5.3e-06
hsa-miR-526b-5p	181.652	5.33509	1.17593	4.53692	5.71e-06
hsa-miR-139-3p	22.5122	-2.34265	0.516829	-4.53273	5.82e-06
hsa-miR-205-5p	67.0582	7.91686	1.74695	4.53183	5.85e-06
hsa-miR-18a-3p	20.7897	-3.45185	0.762004	-4.52996	5.9e-06
hsa-miR-30b-5p	54.1765	2.81464	0.623189	4.51651	6.29e-06
hsa-miR-125b-2-3p	38.6651	5.05232	1.12165	4.50434	6.66e-06
hsa-miR-30c-2-3p	9.10399	4.63575	1.03011	4.50025	6.79e-06
hsa-miR-186-5p	495.434	-1.70805	0.379639	-4.49914	6.82e-06
hsa-miR-25-5p	14.7476	-2.4206	0.548279	-4.4149	1.01e-05
hsa-miR-15a-5p	10.1919	-4.18042	0.947036	-4.41421	1.01e-05
hsa-miR-195-3p	18.8777	4.08815	0.938352	4.35674	1.32e-05
hsa-miR-498	35.9022	8.33634	1.914	4.35544	1.33e-05
hsa-miR-132-3p	11.3121	4.26499	0.979795	4.35295	1.34e-05
hsa-miR-362-5p	5.80473	5.69923	1.31663	4.32866	1.5e-05
hsa-miR-27b-5p	7.09261	6.00005	1.39528	4.30025	1.71e-05
hsa-miR-543	115.542	3.83816	0.895594	4.28561	1.82e-05
hsa-miR-411-3p	3.5257	4.99745	1.171	4.26769	1.98e-05
hsa-miR-512-3p	382.506	4.82455	1.13199	4.26202	2.03e-05
hsa-miR-331-3p	8.33329	4.35163	1.02155	4.25984	2.05e-05
hsa-miR-361-3p	87.1479	1.65696	0.389673	4.25217	2.12e-05
hsa-miR-3909	6.56547	3.43126	0.807417	4.24968	2.14e-05
hsa-miR-323a-3p	10.9889	4.86346	1.15368	4.21562	2.49e-05
hsa-miR-151a-5p	12.9156	2.25203	0.534487	4.21345	2.52e-05
hsa-miR-744-5p	178.119	1.652	0.397183	4.15931	3.19e-05
hsa-miR-495-3p	19.3972	4.61972	1.11087	4.15867	3.2e-05
hsa-miR-181b-5p	144.727	3.44454	0.830976	4.14517	3.4e-05
hsa-miR-132-5p	5.43087	4.98289	1.21343	4.10645	4.02e-05
hsa-miR-424-3p	150.477	1.88777	0.46391	4.06926	4.72e-05
hsa-miR-1-3p	180.808	3.98101	0.983768	4.0467	5.19e-05
hsa-miR-409-3p	128.325	2.63622	0.655208	4.02348	5.73e-05
hsa-miR-378a-5p	6.55545	3.90396	0.972964	4.01244	6.01e-05
hsa-miR-29c-5p	3.2033	4.83845	1.21177	3.99288	6.53e-05
hsa-miR-193a-5p	46.1694	1.64808	0.419599	3.92776	8.57e-05
hsa-miR-1271-5p	5.22504	4.92446	1.2563	3.9198	8.86e-05
hsa-miR-30b-3p	5.16476	4.28404	1.09633	3.90764	9.32e-05
hsa-miR-518e-5p	209.978	4.06028	1.03953	3.90589	9.39e-05
hsa-miR-519b-5p	209.978	4.06028	1.03953	3.90589	9.39e-05
hsa-miR-519c-5p	209.978	4.06028	1.03953	3.90589	9.39e-05
hsa-miR-522-5p	209.978	4.06028	1.03953	3.90589	9.39e-05
hsa-miR-523-5p	209.978	4.06028	1.03953	3.90589	9.39e-05
hsa-miR-30a-3p	34.0767	2.59249	0.66382	3.90541	9.41e-05
hsa-miR-432-5p	35.8899	2.878	0.741145	3.88318	0.0001031
hsa-miR-654-5p	6.69376	3.64702	0.945314	3.858	0.00011432
hsa-let-7c-5p	2714.94	2.22737	0.577833	3.8547	0.000115874
hsa-miR-518e-3p	27.8045	6.70771	1.74493	3.84412	0.000120984
hsa-miR-125b-1-3p	12.9256	3.16803	0.824629	3.84177	0.00012215
hsa-miR-758-3p	3.06422	4.79122	1.25265	3.82488	0.000130836
hsa-miR-522-3p	95.9848	4.46167	1.17941	3.78298	0.000154965
hsa-miR-452-5p	5.45838	3.49112	0.923156	3.78172	0.000155747
hsa-miR-505-3p	37.8282	3.91218	1.04507	3.74348	0.000181491
hsa-miR-210-3p	26.2142	2.70914	0.73038	3.70922	0.0002079
hsa-miR-532-5p	418.072	-1.37446	0.370738	-3.70736	0.00020943
hsa-miR-145-3p	123.788	3.18513	0.859761	3.70467	0.000211667
hsa-miR-183-5p	98.5451	-2.73622	0.742315	-3.68606	0.000227751
hsa-miR-7704	2.72095	4.60438	1.24957	3.68477	0.000228907
hsa-miR-625-3p	41.4054	-2.67245	0.730538	-3.65819	0.000254002
hsa-miR-224-3p	2.79334	4.64	1.27964	3.62603	0.000287814
hsa-miR-625-5p	40.7791	-2.64851	0.731739	-3.61947	0.000295205
hsa-miR-618	2.16123	4.28135	1.19554	3.58111	0.000342142
hsa-miR-519a-5p	228.754	3.81402	1.06752	3.57278	0.000353209
hsa-miR-1226-3p	2.96197	4.12095	1.15498	3.56797	0.000359762
hsa-miR-125a-3p	7.91548	3.55786	1.00754	3.53124	0.000413624
hsa-miR-379-3p	2.13582	4.27286	1.21727	3.51019	0.000447794
hsa-miR-516a-5p	155.76	4.20308	1.20508	3.4878	0.000487009
hsa-let-7b-3p	37.4926	2.67938	0.774883	3.45778	0.000544638
hsa-miR-296-3p	2.80678	4.67116	1.35373	3.45059	0.000559354
hsa-miR-136-3p	3.87548	4.51586	1.31048	3.44596	0.000569031
hsa-miR-106a-5p	9.54011	-2.45456	0.713793	-3.43876	0.000584379
hsa-miR-410-3p	3.63127	5.02131	1.46252	3.43333	0.00059621
hsa-miR-520a-3p	65.3416	4.59677	1.339	3.43299	0.000596959
hsa-miR-487a-5p	6.1855	3.2591	0.959402	3.39701	0.000681258
hsa-miR-532-3p	5.72505	2.63562	0.785226	3.35651	0.000789319
hsa-miR-92a-1-5p	2.68018	3.90314	1.16904	3.33875	0.000841575
hsa-miR-431-3p	2.58296	4.52675	1.36267	3.32198	0.000893803
hsa-miR-299-5p	3.57803	4.24088	1.28022	3.31262	0.000924281
hsa-miR-23b-5p	7.39983	2.98941	0.910365	3.28374	0.00102438
hsa-miR-450a-5p	55.6892	1.46793	0.447415	3.28091	0.00103474
hsa-miR-134-5p	17.5781	2.70119	0.829566	3.25615	0.00112934
hsa-miR-1283	53.1637	4.15229	1.28238	3.23795	0.00120391
hsa-miR-21-3p	1.84612	4.04311	1.27162	3.1795	0.00147531
hsa-miR-675-5p	7.05604	5.35438	1.69068	3.16699	0.00154024
hsa-miR-196b-5p	26.0657	2.44644	0.77467	3.15805	0.0015883
hsa-miR-517c-3p	14.9756	6.43461	2.06691	3.11315	0.001851
hsa-miR-184	3.36191	4.23028	1.36305	3.10354	0.0019122
hsa-let-7d-5p	767.805	1.63762	0.529032	3.09551	0.00196478
hsa-miR-154-5p	1.85985	4.05317	1.31548	3.08114	0.00206209
hsa-miR-423-3p	14.2237	2.49726	0.813733	3.06889	0.00214854
hsa-miR-431-5p	5.72571	4.62079	1.50964	3.06085	0.00220713
hsa-miR-93-5p	231.1	-1.16957	0.382186	-3.06021	0.00221181
hsa-miR-484	486.806	-1.53006	0.500809	-3.05517	0.0022493
hsa-miR-1185-1-3p	3.92589	3.8212	1.26515	3.02036	0.00252471
hsa-miR-516b-5p	1187.88	3.32324	1.10218	3.01516	0.00256844
hsa-miR-652-3p	34.2202	1.01858	0.340489	2.99151	0.00277603
hsa-miR-342-5p	17.3376	-2.25909	0.758819	-2.97711	0.00290978
hsa-miR-26b-5p	821.518	0.80602	0.271839	2.96506	0.00302619
hsa-miR-671-3p	7.32169	2.16388	0.734364	2.9466	0.0032129
hsa-miR-378c	10.8116	1.65136	0.561372	2.94165	0.00326473
hsa-miR-525-5p	32.4029	5.6497	1.94554	2.90393	0.00368509
hsa-miR-526a	43.2414	3.43982	1.19153	2.8869	0.00389057
hsa-miR-542-3p	2.26432	3.05455	1.08911	2.80462	0.00503754
hsa-miR-518f-5p	21.8379	3.45793	1.23657	2.79639	0.00516773
hsa-miR-518d-5p	21.6207	3.44139	1.2318	2.79379	0.00520946
hsa-miR-520c-5p	21.6207	3.44139	1.2318	2.79379	0.00520946
hsa-miR-95-3p	7.98814	1.6531	0.593758	2.78412	0.00536725
hsa-miR-146b-3p	5.43487	3.38291	1.24831	2.70999	0.00672856
hsa-miR-146b-5p	189.631	-1.06123	0.394541	-2.68979	0.00714964
hsa-miR-324-5p	5.50132	3.62445	1.36183	2.66146	0.00778033
hsa-miR-518c-5p	27.9952	5.1737	1.94433	2.66092	0.00779285
hsa-miR-505-5p	19.3682	-1.8451	0.700999	-2.63211	0.00848571
hsa-miR-328-3p	148.05	1.53368	0.586137	2.61658	0.00888145
hsa-miR-675-3p	8.669	3.6889	1.41979	2.5982	0.00937145
hsa-miR-660-5p	11.432	-1.6952	0.656949	-2.58041	0.00986819
hsa-miR-342-3p	27.8633	1.68095	0.652674	2.57549	0.0100099
hsa-miR-34c-5p	2.91036	4.01765	1.56132	2.57324	0.0100751
hsa-miR-326	1.62732	3.13886	1.22986	2.55222	0.0107038
hsa-miR-520a-5p	17.8989	3.86918	1.51928	2.54672	0.0108741
hsa-miR-324-3p	15.0604	2.11213	0.842563	2.5068	0.0121831
hsa-miR-485-3p	19.9254	3.32072	1.36038	2.44102	0.014646
hsa-miR-200a-3p	5.78973	-2.55131	1.04654	-2.43785	0.0147747
hsa-miR-221-5p	8.76043	2.21618	0.909837	2.43581	0.0148587
hsa-miR-191-5p	1013.97	0.658988	0.271705	2.42538	0.0152922
hsa-miR-27a-3p	1042.88	0.981665	0.409778	2.3956	0.0165931
hsa-miR-31-5p	2.00666	4.16732	1.76034	2.36734	0.0179164
hsa-miR-320b	369.794	-1.18005	0.504502	-2.33904	0.0193335
hsa-miR-204-5p	9.90304	3.91817	1.6766	2.33697	0.0194406
hsa-miR-181a-2-3p	22.9341	2.3098	0.990664	2.33157	0.0197233
hsa-miR-330-5p	4.05807	2.04505	0.880785	2.32185	0.0202408
hsa-miR-503-5p	43.3696	1.49404	0.650265	2.29758	0.0215855
hsa-miR-24-2-5p	16.2711	1.58223	0.694017	2.27981	0.0226191
hsa-miR-1292-5p	4.50426	-1.8216	0.813642	-2.23882	0.0251674
hsa-miR-218-5p	52.5103	3.05598	1.3674	2.23488	0.0254249
hsa-miR-335-3p	11.8776	2.80218	1.28009	2.18905	0.028593
hsa-miR-30e-3p	20.8199	0.891394	0.412576	2.16056	0.0307294
hsa-miR-425-3p	17.136	1.11249	0.520121	2.13891	0.0324427
hsa-miR-27a-5p	5.64366	1.73495	0.834086	2.08006	0.0375201
hsa-miR-664a-3p	4.01289	2.17571	1.05689	2.05859	0.0395336
hsa-miR-92b-5p	18.4118	-1.31464	0.669004	-1.96507	0.0494066
