# Supplementary material for: Diagnostic Role of Cell-Free miRNAs in Identifying Placenta Accreta Spectrum during the First-Trimester Screening
Source: Preprints.org preprint supplement (doi:10.20944/preprints202312.0752.v1), 2023-12-12
Supplement: Supplementary file 9 [file Table S8.xlsx]

## Sheet: Лист1
PAS vs (N+PE)
Gene	baseMean	log2FoldChange	lfcSE	stat	p-value	Coefficient of variation
hsa-miR-92a-3p	846.515	0.579093	0.0793656	7.29652	2.95316e-13	0.244136
hsa-miR-101-3p	120.79	-0.96586	0.133277	-7.24701	4.26059e-13	0.351927
hsa-miR-26b-5p	176.964	-0.698349	0.0975109	-7.16176	7.96482e-13	0.247267
hsa-miR-27b-3p	58.7804	-0.785056	0.111823	-7.02053	2.21025e-12	0.299007
hsa-miR-1307-3p	40.6713	0.976866	0.153592	6.36015	2.01553e-10	0.484473
hsa-miR-320a	150.341	0.908607	0.170505	5.32893	9.8794e-08	0.451213
hsa-miR-142-3p	31.9718	-0.829923	0.17139	-4.8423	1.28347e-06	0.459986
hsa-miR-340-5p	17.5039	-1.08743	0.229546	-4.73733	2.1655e-06	0.588627
hsa-miR-21-5p	1203.76	-0.508473	0.109925	-4.62565	3.73424e-06	0.236035
hsa-let-7b-5p	317.84	0.55593	0.120331	4.62003	3.83688e-06	0.285906
hsa-miR-125a-5p	34.9241	0.84951	0.18914	4.49144	7.07439e-06	0.463405
hsa-miR-126-3p	1217.78	-0.509124	0.115749	-4.39852	1.08991e-05	0.257236
hsa-miR-142-5p	76.0248	-0.643675	0.148355	-4.33874	1.43299e-05	0.358035
hsa-miR-484	37.1454	0.735685	0.174373	4.21902	2.45364e-05	0.432253
hsa-miR-144-3p	19.0179	-1.5479	0.37047	-4.1782	2.93828e-05	0.886838
hsa-miR-150-5p	22.7158	1.10578	0.264678	4.17783	2.94306e-05	0.75523
hsa-miR-139-5p	40.2654	0.674849	0.167851	4.02052	5.807e-05	0.42112
hsa-miR-486-5p	6.79603	1.23243	0.323397	3.81089	0.00013847	0.807708
hsa-miR-99b-5p	40.8712	0.65237	0.176656	3.69288	0.000221726	0.392775
hsa-miR-30d-5p	417.931	0.353078	0.0971011	3.63618	0.000276708	0.211615
hsa-let-7f-5p	1334.44	-0.244323	0.0698055	-3.50006	0.000465154	0.132319
hsa-miR-148b-3p	62.5457	-0.546909	0.161376	-3.38904	0.000701377	0.355643
hsa-miR-3168	13.49	-1.32206	0.392006	-3.37254	0.00074477	1.05669
hsa-miR-27a-3p	116.63	-0.479585	0.142335	-3.36941	0.000753283	0.332526
hsa-miR-148a-3p	541.278	-0.433132	0.130663	-3.31488	0.000916823	0.284259
hsa-miR-26a-5p	5808.86	-0.271668	0.0827799	-3.28181	0.00103144	0.155985
hsa-miR-199b-3p	73.3492	-0.460436	0.140981	-3.26594	0.00109101	0.320963
hsa-miR-532-5p	9.26665	0.841967	0.264372	3.18478	0.00144864	0.707907
hsa-miR-25-3p	60.7829	0.502471	0.159324	3.15377	0.00161175	0.348344
hsa-miR-106b-3p	13.2515	0.749539	0.23809	3.14813	0.00164317	0.514712
hsa-miR-199a-5p	83.8085	-0.510556	0.16813	-3.03667	0.00239205	0.352718
hsa-miR-744-5p	53.4635	0.581178	0.197953	2.93594	0.00332539	0.424565
hsa-miR-1301-3p	7.94856	0.923785	0.317951	2.90544	0.00366743	0.695041
hsa-miR-199a-3p	146.777	-0.433726	0.1501	-2.88959	0.00385749	0.32085
hsa-miR-126-5p	28.2362	-0.50796	0.178385	-2.84755	0.00440572	0.391253
hsa-miR-28-3p	17.1793	0.599663	0.213542	2.80817	0.00498235	0.455595
hsa-miR-23b-3p	8.85491	0.626285	0.241658	2.59162	0.00955265	0.487034
hsa-miR-30e-5p	98.6092	-0.296042	0.114881	-2.57695	0.00996775	0.248498
hsa-miR-425-5p	32.0733	0.447018	0.175319	2.54974	0.0107803	0.351454
hsa-let-7g-5p	280.371	-0.260747	0.103288	-2.52448	0.0115869	0.223449
hsa-miR-625-5p	14.586	0.799848	0.320768	2.49354	0.0126476	0.774258
hsa-miR-98-5p	52.3494	-0.298952	0.122427	-2.44187	0.0146113	0.257187
hsa-miR-1246	3.33401	1.2343	0.515879	2.39262	0.0167284	1.20339
hsa-miR-339-5p	5.48398	0.768937	0.323436	2.3774	0.0174352	0.720409
hsa-miR-3615	10.7268	0.63889	0.27377	2.33367	0.0196128	0.61467
hsa-miR-361-3p	15.2392	0.477671	0.207448	2.30261	0.0213011	0.419949
hsa-let-7d-5p	141.167	0.231669	0.101463	2.28329	0.0224133	0.198266
hsa-miR-128-3p	252.665	0.272395	0.119781	2.2741	0.0229598	0.241996
hsa-miR-185-5p	23.9207	0.432819	0.190673	2.26996	0.0232099	0.445583
hsa-let-7a-3p	8.04877	-0.969004	0.43875	-2.20855	0.0272057	0.910018
hsa-miR-125b-5p	9.01717	1.08304	0.496513	2.18129	0.0291623	1.30652
hsa-miR-328-3p	23.9592	0.518072	0.238603	2.17127	0.0299106	0.49843
hsa-miR-625-3p	17.9298	0.644931	0.302768	2.13011	0.0331621	0.745681
hsa-miR-16-5p	34.426	-0.350946	0.165215	-2.12417	0.0336557	0.350836
hsa-miR-342-5p	3.27746	0.929219	0.438322	2.11994	0.0340108	1.00282
hsa-miR-423-3p	9.58992	0.553096	0.264711	2.08944	0.0366686	0.56003
hsa-miR-409-3p	40.2378	0.616965	0.31101	1.98375	0.0472842	0.697111
hsa-miR-223-5p	25.1431	0.360185	0.182245	1.97638	0.0481117	0.36082
hsa-miR-143-3p	34.671	-0.520353	0.267012	-1.9488	0.0513191	0.655677
hsa-miR-139-3p	4.21313	0.858226	0.454476	1.88838	0.0589743	1.05847
hsa-miR-151a-3p	357.914	0.207595	0.110342	1.88137	0.0599211	0.213651
hsa-miR-221-3p	87.857	0.248041	0.132081	1.87794	0.0603887	0.258048
hsa-miR-23a-3p	13.9313	0.383023	0.204164	1.87606	0.0606474	0.481524
hsa-miR-191-5p	235.649	0.202078	0.109069	1.85274	0.0639192	0.222344
hsa-miR-330-3p	7.07451	0.449386	0.245496	1.83053	0.0671713	0.517523
hsa-miR-381-3p	15.2184	-0.691011	0.37804	-1.82788	0.0675683	0.799055
hsa-miR-29a-3p	14.2451	-0.410424	0.227602	-1.80325	0.0713488	0.469128
hsa-miR-140-3p	27.8518	0.294852	0.167669	1.75854	0.0786558	0.314301
hsa-miR-144-5p	6.19112	-0.705572	0.426239	-1.65534	0.0978547	1.0827
hsa-miR-127-3p	16.4557	0.595621	0.360349	1.6529	0.0983508	0.759896
hsa-miR-370-3p	15.7796	0.561572	0.340681	1.64838	0.0992747	0.810342
hsa-miR-134-5p	6.70438	0.795221	0.490237	1.62211	0.104779	1.02934
hsa-miR-629-5p	7.87003	0.458567	0.283405	1.61807	0.105648	0.592398
hsa-let-7i-5p	1549.15	-0.132137	0.0820219	-1.611	0.10718	0.143852
hsa-miR-374a-5p	5.85292	-0.484166	0.305046	-1.58719	0.11247	0.639371
hsa-miR-30a-5p	31.3427	-0.400349	0.255975	-1.56401	0.117814	0.654246
hsa-miR-20a-5p	8.90088	-0.384628	0.254752	-1.50982	0.13109	0.464965
hsa-miR-941	29.1089	0.757101	0.501978	1.50823	0.131494	0.77509
hsa-miR-222-3p	31.4067	0.241104	0.165981	1.4526	0.146335	0.330494
hsa-miR-543	23.3333	0.492714	0.34281	1.43728	0.150639	0.670655
hsa-miR-107	10.0022	-0.362466	0.267227	-1.3564	0.174972	0.556833
hsa-miR-342-3p	4.29851	0.577674	0.428758	1.34732	0.177878	0.871941
hsa-miR-99a-5p	99.485	0.236536	0.178098	1.32812	0.184139	0.401833
hsa-miR-30e-3p	22.9321	0.219102	0.187737	1.16707	0.243183	0.355445
hsa-miR-584-5p	24.5578	0.242973	0.215181	1.12916	0.258832	0.433301
hsa-miR-24-3p	103.659	0.118222	0.108447	1.09013	0.275654	0.214362
hsa-let-7d-3p	14.1352	0.248408	0.230485	1.07776	0.281139	0.456298
hsa-let-7a-5p	1830.92	0.0983682	0.0919645	1.06963	0.284785	0.165488
hsa-miR-30c-5p	164.81	0.116798	0.117179	0.996753	0.318885	0.216853
hsa-miR-378a-3p	8.96148	0.292583	0.294145	0.99469	0.319887	0.651306
hsa-miR-152-3p	10.2069	-0.235011	0.2412	-0.974341	0.329887	0.508713
hsa-miR-146a-5p	293.375	-0.112199	0.117123	-0.957964	0.338081	0.213386
hsa-miR-22-3p	80.7514	0.135017	0.145062	0.930752	0.351982	0.307771
hsa-miR-363-3p	22.3541	-0.193251	0.207987	-0.929151	0.352811	0.415542
hsa-miR-379-5p	6.57226	-0.333891	0.35958	-0.928558	0.353118	0.685841
hsa-miR-493-3p	3.90907	-0.422628	0.486044	-0.869526	0.38456	1.02179
hsa-miR-382-5p	7.44957	0.381386	0.439867	0.86705	0.385915	0.822186
hsa-miR-100-5p	13.3183	-0.41656	0.524525	-0.794167	0.427098	1.57038
hsa-miR-30a-3p	6.54452	0.297314	0.375248	0.792314	0.428177	0.724539
hsa-miR-493-5p	9.35463	-0.334033	0.433231	-0.771029	0.44069	1.03232
hsa-miR-451a	638.398	0.18995	0.247377	0.767857	0.442572	0.536626
hsa-miR-17-5p	10.6167	-0.17674	0.232452	-0.76033	0.447058	0.426064
hsa-miR-22-5p	5.80878	-0.224928	0.310546	-0.724299	0.468882	0.666109
hsa-miR-146b-5p	109.006	0.0909425	0.138114	0.658459	0.510243	0.303302
hsa-miR-181b-5p	15.4414	0.224656	0.342437	0.656049	0.511793	0.709842
hsa-miR-654-3p	8.21251	0.280222	0.438981	0.638346	0.523248	0.990408
hsa-miR-10a-5p	77.2547	0.130507	0.205086	0.636355	0.524545	0.442163
hsa-miR-516b-5p	9.95223	-0.242871	0.523247	-0.464162	0.642532	1.06649
hsa-miR-320b	26.7393	0.1316	0.289358	0.4548	0.649253	0.836568
hsa-miR-155-5p	13.0904	0.124423	0.275709	0.451285	0.651784	0.729094
hsa-miR-320c	11.55	0.129049	0.291845	0.442182	0.658358	0.791146
hsa-miR-30b-5p	9.2937	0.1493	0.345398	0.432256	0.665556	0.883092
hsa-miR-7-5p	85.7884	-0.0933556	0.217484	-0.429252	0.66774	2.78572
hsa-miR-28-5p	4.25295	-0.137239	0.335533	-0.409019	0.682526	0.630685
hsa-miR-182-5p	7.95392	-0.176232	0.432236	-0.407722	0.683478	0.831151
hsa-miR-224-5p	8.56103	0.12588	0.321966	0.390973	0.695817	0.676704
hsa-let-7c-5p	102.116	0.0513851	0.141226	0.363851	0.715969	0.276143
hsa-miR-181a-5p	147.438	-0.0562637	0.159506	-0.352736	0.724286	0.288452
hsa-miR-340-3p	9.19798	-0.0868113	0.260502	-0.333246	0.738949	0.538242
hsa-miR-16-2-3p	19.108	0.0579336	0.195958	0.295644	0.767502	0.354319
hsa-miR-1908-5p	3.03277	0.115282	0.475463	0.242463	0.808421	1.01263
hsa-miR-335-3p	6.09688	0.0734874	0.342601	0.214499	0.830158	0.702364
hsa-miR-223-3p	35.4457	0.0380587	0.185332	0.205354	0.837296	0.35036
hsa-miR-432-5p	8.34293	0.0737578	0.390929	0.188673	0.850349	0.82424
hsa-let-7e-5p	17.5188	-0.047043	0.24965	-0.188436	0.850535	0.556162
hsa-miR-186-5p	29.9027	-0.0279476	0.149638	-0.186769	0.851842	0.302291
hsa-miR-192-5p	14.9077	0.0368242	0.272346	0.135211	0.892445	0.585837
hsa-miR-10b-5p	126.644	0.0349706	0.273488	0.127869	0.898253	0.642311
hsa-miR-93-5p	12.6861	0.00401023	0.237181	0.0169079	0.98651	0.513747
